# Supplementary material
Source: PubMed Central journal article supplement (PMC3170664)
Supplement: NIHMS290942-supplement-1.pdf [file NIHMS290942-supplement-1.pdf]

## **Modeling the functional genomics of autism using human neurons**

Genevieve Konopka, Eric Wexler, Ezra Rosen, Zohar Mukamel, Gregory E. Osborn, Leslie Chen, Daning Lu, Fuying Gao, Kun Gao, Jennifer K. Lowe, and Daniel H. Geschwind

### **Supplementary Information**

#### **Supplemental Methods**

R code for network analysis

#### **Supplemental Figure 1**

Hierarchical clustering of the gene expression profiles of differentiating NHNPs. A) Clustering of the samples based on the expression of all genes on the arrays. B) Clustering of the samples based on the top 500 most variable genes on the arrays among the four groups. There is a distinct clustering of To (wo) and D2 (w2) samples together and D4 (w4) and D8 (w8) samples together.

#### **Supplemental Figure 2**

Network visualization of modules containing ASD genes, selecting all ASD genes for inclusion. A) Turquoise module with all ASD genes included. B) Royal blue module with all ASD genes included.

#### **Supplementary Table 1**

Cell Line Characteristics

#### **Supplementary Table 2**

Genes differentially expressed after four weeks of differentiation

#### **Supplementary Table 3**

Complete gene ontology data

**Supplementary Table 4**

Overlap of genes changing at D4 in NHNPs and between 18GW and 23GW *in vivo*

**Supplementary Table 5**

Module characterization

**Supplementary Table 6**

WGCNA gene membership and information

**Supplementary Table 7**

Gene ontology of ASD-related modules

**Supplementary Table 8**

Sequences of primers utilized in qRT-PCR and *in situ* hybridization

## **Supplemental Methods**

### **#1 read in data**

```
setwd("/data/home/fuying/NHNP")

library(Biobase)
library(marray)
library(limma)
library(RColorBrewer)
library(MASS)
library(gplots)
library(MASS)
library(class)
library(cluster)
library(sma)
library(impute)
library(scatterplot3d)

source("/data/home/fuying/NetworkFunctions.txt")
source("/data/home/fuying/MO_fxs.txt")

curr.study="NHNP"

dat1<-read.csv("NHNP_normalized.csv", header=T)
dim(dat1)

dat1<-dat1[!duplicated(dat1$Target),]
dim(dat1)

rownames(dat1)=dat1$Target
```

### **2. selection**

```
data5<-dat1[,5:20]
row.mean<-apply(data5,1,mean)
row.sd<-apply(data5,1,sd)
row.cv<- row.sd/ row.mean

data2<-cbind(dat1, row.mean, row.sd, row.cv)

data3<-data2[order(data2$row.cv, decreasing=TRUE),]

dat2<- data2[data2$row.cv>=0.033,c(5:20)]
dim(dat2)

datExpr = data.frame(t(dat2))
dim(datExpr)
```

### **3. choosing the power**

```
timestamp()
powers1=c(seq(1,20,by=1))
collect_garbage()
TableSoft=PickSoftThreshold(datExpr, powervector=powers1)[[2]]
timestamp()

pdf("power-curve.pdf", height=10, width=18)
par(mfrow=c(1,2))
plot(TableSoft$Power, -sign(TableSoft[,3]* TableSoft[,2]), xlab="power", ylab=" Scale Free Topology Model Fit,signed
R^2")
text(TableSoft$Power, TableSoft$scale.law.R.2, labels=powers1, cex=1,col="red")
#identify(TableSoft$Power, TableSoft$scale.law.R.2, cex=0.6, col=3 )
abline(h=0.9, col=4)
abline(h=0.8, col=6)
plot(TableSoft$Power, TableSoft$mean.k.,
xlab="Soft Threshold (power)",ylab="Mean Connectivity", type="n",
main = paste("Mean connectivity"))
text(TableSoft$Power, TableSoft[,5], labels=powers1, cex=0.6,col="red")
dev.off()
```

### **4. trying power =, get connectivity**

```
curr.power=12
```

#### **5a. computing the adjacency matrix**

```
collect_garbage()
AdjMat = abs(cor(datExpr,use="p"))^curr.power
collect_garbage()
diag(AdjMat)=0
collect_garbage()
dim(AdjMat)
```

#### **5b. computing the TOM**

```
curr.step<-"5b"
noFirstPass=ncol(datExpr)

collect_garbage()
timestamp()
distTOM <- TOMdist1(AdjMat)
timestamp()
```

#### **5c. clustering TOM**

```
curr.step<-"5c"

collect_garbage()
timestamp()
hierTOM <- hclust(as.dist(distTOM),method="average")
timestamp()
collect_garbage()
```

## **6. cutting the tree**

```
curr.step<-"6"
```

```
mydeepSplit = TRUE  
myminModuleSize = 20
```

```
outfile=<-paste(curr.study,"_",curr.step,"_",noFirstPass,"_InitialModulesTesting_", "p",curr.power,".pdf",sep="")
```

```
pdf(file=outfile)
```

```
for (cutoffs in c(0.995,0.990,0.985,0.980, 0.975, 0.97, 0.965, 0.96, 0.955, 0.95, 0.945, 0.94, 0.93, 0.92, 0.9)) {  
  myheightcutoff = cutoffs
```

```
  colorh1=cutreeDynamic(hierclust= hierTOM, deepSplit=mydeepSplit, maxTreeHeight=myheightcutoff,  
    minModuleSize=myminModuleSize)
```

```
  par(mfrow=c(2,1),mar=c(2,2,2,2))
```

```
    plot(hierTOM,  
      main=paste(outfile,"_cutoff: ",cutoffs,  
        "_Modules=",length(unique(colorh1)),  
        "_NotGrey=", length(colorh1[!colorh1=="grey"])
```

```
,sep=""),labels=F,cex.main=0.8)
```

```
  abline(h=myheightcutoff,col="red",lwd=1)
```

```
  hclustplot1(hierTOM,colorh1,title1=paste("DTC modules,",myheightcutoff,  
    "min",myminModuleSize,"mds=",mydeepSplit))
```

```
  cat("cutoff=",cutoffs," Modules=",length(unique(colorh1)),  
    "NotGreyGenes",length(colorh1[!colorh1=="grey"]),"\n")
```

```
} #end cutoff testing
```

```
dev.off()
```

## **7a. choosing a cut threshold**

```
curr.step="7a"
```

```
curr.cutoff<-0.99
```

```
mydeepSplit = TRUE
```

```
myminModuleSize = 20
```

```
myheightcutoff = curr.cutoff
```

```
colorh1=cutreeDynamic(hierclust= hierTOM, deepSplit=mydeepSplit, maxTreeHeight=myheightcutoff,  
  minModuleSize=myminModuleSize)
```

```
data.frame(table(colorh1))
```

```
PSID=data2$Target[data2$row.cv>=0.033]
```

```
datout1=data.frame(PSID,colorh1)
```

```
colnames(datout1)=c("PSID","colorh1")
```

```
outfile=<-paste(curr.study,"_ratio_",curr.step,"_InitialModules_", "cut",curr.cutoff,"_p",curr.power,".csv",sep="")
```

```
write.table(datout1, paste(outfilename),sep=",")
```

## **7b. computing and clustering the PCs**

```
curr.step="7b"
```

```
pcs = ModulePrinComps1(datexpr=as.matrix(datExpr), couleur=as.character(colorh1))
```

```
distCorPCs = 1-abs(cor(pcs[[1]],use="p"))
```

```
distCorPCs = ifelse(is.na(distCorPCs), 0, distCorPCs)
```

```
h1PCs = hclust(as.dist(distCorPCs),method="a")
```

### **##PDF output**

```
outfilename<-
```

```
paste(curr.study,"_",curr.step,"_",noFirstPass,"_InitialModules_", "cut",curr.cutoff,"_p",curr.power,"_PCs.pdf",sep="")
```

```
pdf(file= paste(outfilename,sep=""),bg="transparent",width=21,height=12)
```

```
par(mfrow=c(3,1),mar=c(2,2,2,2))
```

```
#first section: tree
```

```
plot(hierTOM,main=outfilename,labels=F)
```

```
#second section: color codes for modules
```

```
hclustplot1(hierTOM,colorh1,title1=paste("DTC modules",myheightcutoff, "min",myminModuleSize,"mds=",mydeepSplit))
```

```
#third section: clustering of PCs
```

```
plot(h1PCs, xlab="",ylab="",main="",sub="")
```

```
abline(h=0.1, col=3)
```

```
abline(h=0.2, col=4)
```

```
dev.off()
```

## **#8. Re-building the network without the grey genes**

```
curr.step="8"
```

```
greyvec=colorh1=="grey"
```

```
datExpr2=datExpr[!,greyvec]
```

```
dim(datExpr2)
```

```
noFirstPass=ncol(datExpr)
```

```
noSecondPass=ncol(datExpr2)
```

### **#8a. computing the adjacency matrix**

```
AdjMat2 = abs(cor(datExpr2,use="p"))^curr.power
```

```
diag(AdjMat2)=0
```

```
collect_garbage()
```

```
dim(AdjMat2)
```

## **8b. computing the TOM**

```
curr.step="8b"

timestamp()
distTOM2 <- TOMdist1(AdjMat2)
timestamp()
collect_garbage()
```

## **8c. clustering TOM**

```
curr.step="8c"

timestamp()
hierTOM2 <- hclust(as.dist(distTOM2),method="average")
timestamp()

collect_garbage()
```

## **9. cutting the tree**

```
curr.step<-"9"

mydeepSplit = TRUE
myminModuleSize = 20

outfile<-
paste(curr.study,"_",curr.step,"_",noFirstPass,"_ModuleSecondTesting_", "p",curr.power,"greyRemove",noSecondPass,".pdf",sep="")

pdf(file= paste(outfile,sep=""))
for (cutoffs in c(0.995, 0.990,0.985,0.980, 0.975, 0.970, 0.965, 0.960, 0.955, 0.950)) {
  myheightcutoff = cutoffs

  colorh1=cutreeDynamic(hierclust= hierTOM2, deepSplit=mydeepSplit, maxTreeHeight=myheightcutoff,
minModuleSize=myminModuleSize)
  par(mfrow=c(2,1),mar=c(2,2,2,2))
  plot(hierTOM2,
main=paste(outfile,"_cutoff: ",cutoffs,
"_Modules=",length(unique(colorh1)),
"_NotGrey=", length(colorh1[!colorh1=="grey"]))
,sep=""),labels=F,cex.main=0.5)
  abline(h=myheightcutoff,col=2,lwd=0.8)
  hclustplot1(hierTOM2,colorh1,title1=paste("DTC modules,",myheightcutoff,
"min",myminModuleSize,"mds=",mydeepSplit))
  cat("cutoff=",cutoffs," Modules=",length(unique(colorh1)),
NotGreyGenes",length(colorh1[!colorh1=="grey"]),"\n")
} #end cutoff testing
dev.off()
```

## **9a. choosing a cut threshold**

```
curr.step="9a"
```

```
myheightcutoff =0.995
mydeepSplit = TRUE
myminModuleSize = 20
```

```
colorh1=cutreeDynamic(hierclust=hierTOM2, deepSplit=mydeepSplit, maxTreeHeight=myheightcutoff,
minModuleSize=myminModuleSize)
```

```
length(unique(colorh1))
#[1]105
```

```
outfile<-paste(
curr.study,"_",curr.step,"_",noFirstPass,"_", "p",curr.power,"greyRemove",noSecondPass,"_ChosenCut=",myheightcutoff,".
pdf",sep="")
```

```
pdf(file= paste(outfile,sep=""),bg="transparent",width=21,height=12)
```

```
par(mfrow=c(2,1),mar=c(2,2,2,2))
plot(hierTOM2,main=outfile,labels=F,cex.main=0.8)
hclustplot1(hierTOM2,colorh1,title1=paste("DTC modules,",myheightcutoff,
"min",myminModuleSize,"mds=",mydeepSplit))
dev.off()
```

## **9b. computing and clustering the PCs**

```
curr.step="9b"
```

```
pcs = ModulePrinComps1(datexpr=as.matrix(datExpr2), couleur=as.character(colorh1))
distCorPCs = 1-abs(cor(pcs[[1]],use="p"))
distCorPCs = ifelse(is.na(distCorPCs), 0, distCorPCs)
h1PCs = hclust(as.dist(distCorPCs),method="a")
```

```
Rd2ModuleNumbers=ModuleQCnoPerm(datExpr1=datExpr2,couleur=colorh1,distTOM1=distTOM2,hierTOM1=hierTOM2
,pcs1=pcs)
```

```
write.table(Rd2ModuleNumbers,file="ModuleNumbers_SecondPass_998cut.csv",sep=";",row.names=F,col.names=T)
collect_garbage()
```

```
mod.pos<- Rd2ModuleNumbers[,c(1,2,8)]
mod.pos[,1]<- (as.character(mod.pos[,1]))
mod.pos<-mod.pos[order(mod.pos[,1]),]
```

```
h1PCs$labels
```

```
mod.pos
```

```
new.lab<-paste(mod.pos[,3],mod.pos[,1], mod.pos[,2],sep="_")
new.lab->h1PCs$labels
```

```
outfile<-paste(
curr.study,"_",curr.step,"_",noFirstPass,"_", "p",curr.power,"greyRemove",noSecondPass,"_ChosenCut=",myheightcutoff,"P
Cs.pdf",sep="")
```



```

pdf(file= paste(outfilename,sep=""),bg="transparent",width=21,height=12)

par(mfrow=c(3,1),mar=c(2,2,2,2))

plot(hierTOM2,main=outfilename, labels=F)

hclustplot1(hierTOM2,colorh1,title1=paste("DTC modules,",myheightcutoff, "min",myminModuleSize))

plot(h1PCs, xlab="",ylab="",main="",sub="")
abline(h=0.1, col=3)
abline(h=0.2,col=5)

dev.off()

datout2=data.frame(PSID[!greyvec],colorh1)
colnames(datout2)=c("PSID","colorh1")

write.table(datout2,"ModuleNumbers_SecondPass_singleGenes_premerge.csv",sep="," ,row.names=F)

```

## **10. Merging the modules**

```

colorh1 = merge2Clusters(colorh1, mainclusterColor="red3", minorclusterColor="darkslateblue")
colorh1 = merge2Clusters(colorh1, mainclusterColor="green3", minorclusterColor="thistle4")
colorh1 = merge2Clusters(colorh1, mainclusterColor="green3", minorclusterColor="wheat1")
colorh1 = merge2Clusters(colorh1, mainclusterColor="green3", minorclusterColor="navajowhite4")
colorh1 = merge2Clusters(colorh1, mainclusterColor="green3", minorclusterColor="palegreen3")
colorh1 = merge2Clusters(colorh1, mainclusterColor="lightblue1", minorclusterColor="dodgerblue2")
colorh1 = merge2Clusters(colorh1, mainclusterColor="lightblue1", minorclusterColor="tomato1")
colorh1 = merge2Clusters(colorh1, mainclusterColor="darkmagenta", minorclusterColor="midnightblue")
colorh1 = merge2Clusters(colorh1, mainclusterColor="darkmagenta", minorclusterColor="seagreen2")
colorh1 = merge2Clusters(colorh1, mainclusterColor="pink4", minorclusterColor="orangered1")
colorh1 = merge2Clusters(colorh1, mainclusterColor="pink4", minorclusterColor="violet")
colorh1 = merge2Clusters(colorh1, mainclusterColor="lightsalmon1", minorclusterColor="olivedrab3")
colorh1 = merge2Clusters(colorh1, mainclusterColor="blue4", minorclusterColor="orchid2")
colorh1 = merge2Clusters(colorh1, mainclusterColor="blue4", minorclusterColor="lightgoldenrod2")
colorh1 = merge2Clusters(colorh1, mainclusterColor="royalblue4", minorclusterColor="lightsteelblue4")
colorh1 = merge2Clusters(colorh1, mainclusterColor="black", minorclusterColor="sandybrown")
colorh1 = merge2Clusters(colorh1, mainclusterColor="brown1", minorclusterColor="deepskyblue4")
colorh1 = merge2Clusters(colorh1, mainclusterColor="green3", minorclusterColor="aquamarine2")

colorh1 = merge2Clusters(colorh1, mainclusterColor="brown", minorclusterColor="brown1")
colorh1 = merge2Clusters(colorh1, mainclusterColor="blue", minorclusterColor="blue4")
colorh1 = merge2Clusters(colorh1, mainclusterColor="red", minorclusterColor="red3")
colorh1 = merge2Clusters(colorh1, mainclusterColor="yellow", minorclusterColor="lightyellow1")
colorh1 = merge2Clusters(colorh1, mainclusterColor="salmon", minorclusterColor="lightsalmon1")
colorh1 = merge2Clusters(colorh1, mainclusterColor="navy", minorclusterColor="cornflowerblue")
colorh1 = merge2Clusters(colorh1, mainclusterColor="pink", minorclusterColor="pink4")
colorh1 = merge2Clusters(colorh1, mainclusterColor="magenta", minorclusterColor="goldenrod1")
colorh1 = merge2Clusters(colorh1, mainclusterColor="skyblue", minorclusterColor="goldenrod")
colorh1 = merge2Clusters(colorh1, mainclusterColor="cyan", minorclusterColor="lightblue1")
colorh1 = merge2Clusters(colorh1, mainclusterColor="royalblue", minorclusterColor="royalblue4")
colorh1 = merge2Clusters(colorh1, mainclusterColor="tan", minorclusterColor="sienna1")
colorh1 = merge2Clusters(colorh1, mainclusterColor="gold4", minorclusterColor="slateblue2")
colorh1 = merge2Clusters(colorh1, mainclusterColor="purple", minorclusterColor="mediumvioletred")
colorh1 = merge2Clusters(colorh1, mainclusterColor="green", minorclusterColor="green3")
colorh1 = merge2Clusters(colorh1, mainclusterColor="orange", minorclusterColor="mediumslateblue")
colorh1 = merge2Clusters(colorh1, mainclusterColor="seagreen", minorclusterColor="mediumspringgreen")

```

```
colorh1 = merge2Clusters(colorh1, mainclusterColor="darkcyan", minorclusterColor="hotpink3")
```

## **10c. computing and clustering the PCs**

```
curr.step<-"10c"
```

```
pcs = ModulePrinComps1(datexpr=as.matrix(datExpr2), couleur=as.character(colorh1))  
distCorPCs = 1-abs(cor(pcs[[1]],use="p"))  
distCorPCs = ifelse(is.na(distCorPCs), 0, distCorPCs)  
h1PCs = hclust(as.dist(distCorPCs),method="a")
```

```
Rd6ModuleNumbers=ModuleQCnoPerm(datExpr1=datExpr2,couleur=colorh1,distTOM1=distTOM2,hierTOM1=hierTOM2,  
,pcs1=pcs)
```

```
mod.pos<- Rd6ModuleNumbers[,c(1,2,8)]  
mod.pos[,1]<- (as.character(mod.pos[,1]))  
mod.pos<-mod.pos[order(mod.pos[,1]),]
```

```
h1PCs$labels  
mod.pos  
#just to check
```

```
new.lab<-paste(mod.pos[,3],mod.pos[,1], mod.pos[,2],sep="_")  
new.lab->h1PCs$labels
```

```
outfilename<-  
paste(curr.study,"_",curr.step,"_",noFirstPass,"_", "p",curr.power,"greyRemove",noSecondPass,"_ChosenCut=",myheightcu  
toff,"PCs_afterMerging.pdf",sep="")
```

```
pdf(file= paste(outfilename,sep=""),bg="transparent",width=21,height=12)  
par(mfrow=c(3,1),mar=c(2,2,2,2))  
plot(hierTOM2,main=outfilename,labels=F)  
hclustplot1(hierTOM2,colorh1,title1=paste("DTC modules,",myheightcutoff, "min",myminModuleSize))  
plot(h1PCs, xlab="",ylab="",main="",sub="")  
abline(h=0.1,col=3)  
abline(h=0.2,col=6)  
dev.off()
```

## **11. Data output**

```
PSID2=dat1$Target[data2$row.cv>=0.033] [!greyvec]  
Gene2= dat1$Symbol [data2$row.cv>=0.033] [!greyvec]  
Desc2= dat1$Definition [data2$row.cv>=0.033] [!greyvec]  
ASID2<- dat1$Accession [data2$row.cv>=0.033] [!greyvec]
```

```
datout3=data.frame(PSID[!greyvec],colorh1)  
colnames(datout3)=c("PSID","colorh1")  
write.table(datout3,"modules_postmerge.csv",sep="," ,row.names=F)
```

```
collect_garbage()  
alldegrees=DegreeInOutMO(datExpr1=datExpr2,adj1=AdjMat2,couleur=colorh1,pcs1=pcs)
```

```

collect_garbage()
dim(alldegrees)
meanExpr=apply(datExpr2,2,mean)
datout=data.frame(PSID2, Gene2, Desc2, ASID2, colorh1, alldegrees, meanExpr)
write.table(datout,file="Modules_ke_info.csv",sep="," ,row.names=F,col.names=T)

```

```

FinalModuleNumbers=ModuleQCnoPerm(datExpr1=datExpr2, couleur=colorh1, distTOM1=distTOM2, hierTOM1=hierTOM
2, pcs1=pcs)
write.table(FinalModuleNumbers, file="FinalModuleNumbers.csv", sep="," , row.names=F, col.names=T)
collect_garbage()

```

## **12. Network Connectivity Permutation Analysis**

```

ADJ<-AdjMat2
aa<-read.csv("ASD.csv",header=T)

```

```

#ASD.csv is merged from SFARI.gene list and module info
#only got 105 overlapping

```

```

ASD<-aa$PSID2
observed = mean(ADJ[ASD,ASD]) #0.3824946
#where "ASD" is the list of ASD genes.
expected = NULL for (k in 1:5000){ randGenes = sample (1:dim(ADJ)[2],length(ASD)) xx<-
mean(ADJ[randGenes,randGenes])
expected = c(expected, mean(ADJ[randGenes,randGenes]))
pValue = sum(expected>observed)/5000
res<-cbind(xx,pValue)
if (k==1)
res2<-res
else
res2<-rbind(res2,res)
print(k) }
write.table(res2, "pvalue_perm5000.csv",sep="," ,)

```

```

#observed value of entire network
observed=mean(ADJ)
observed
[1] 0.06602216

```

A

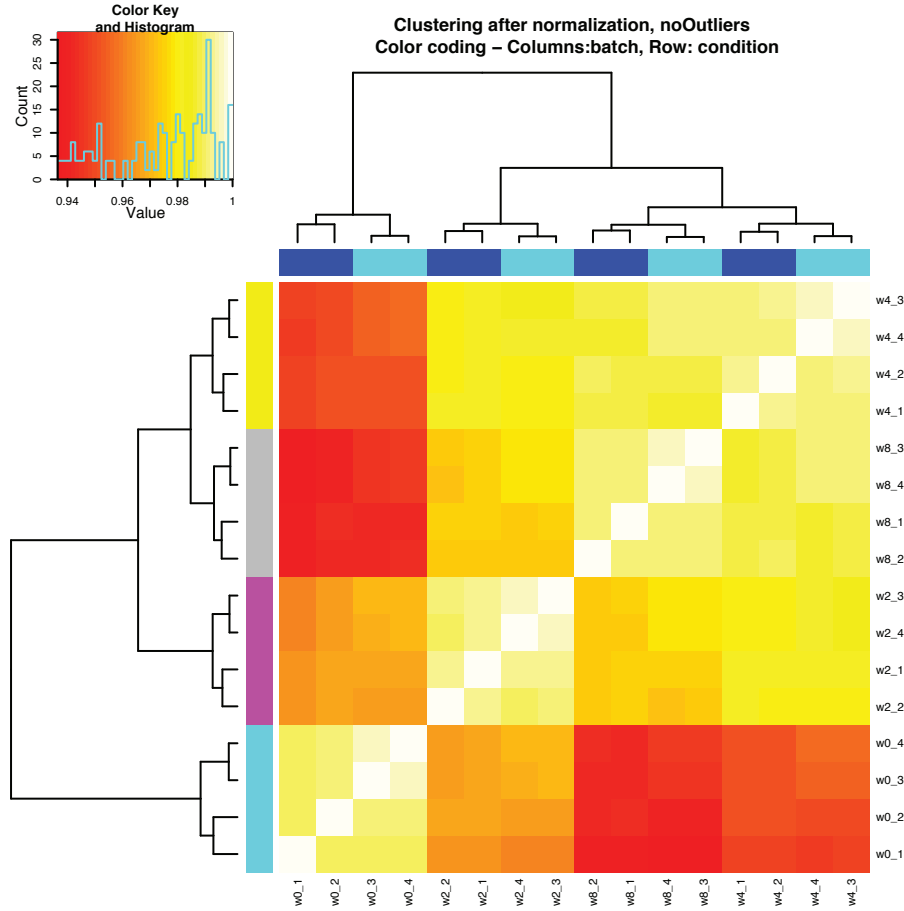

B

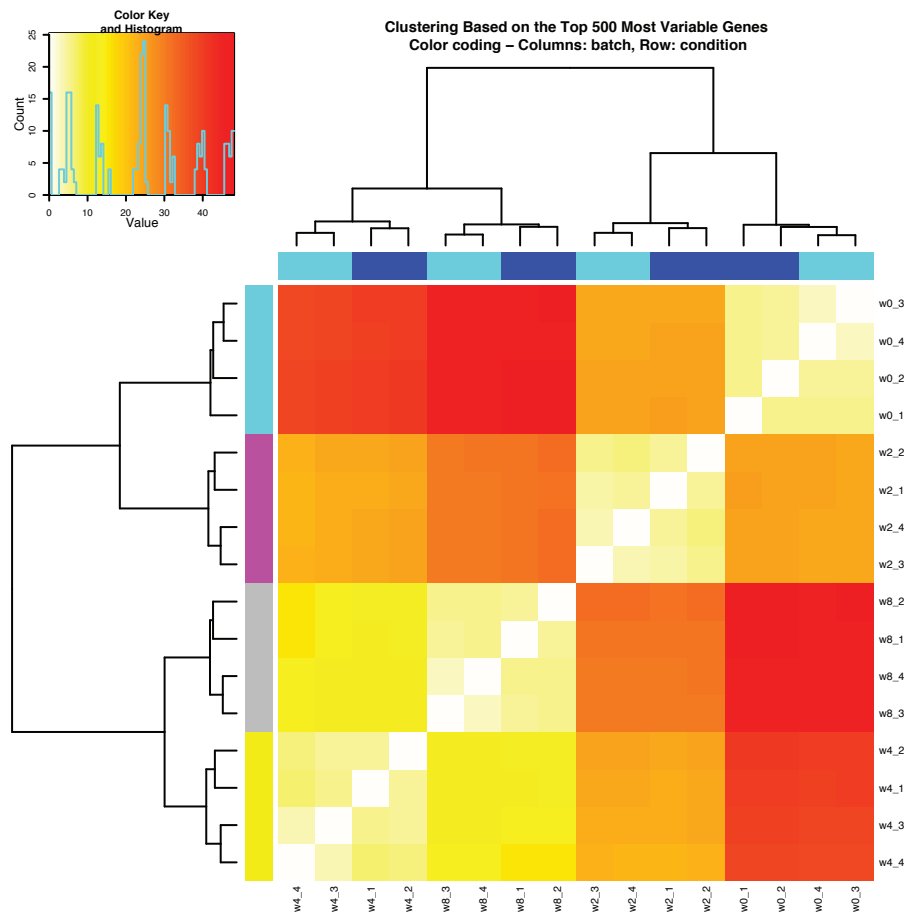

A

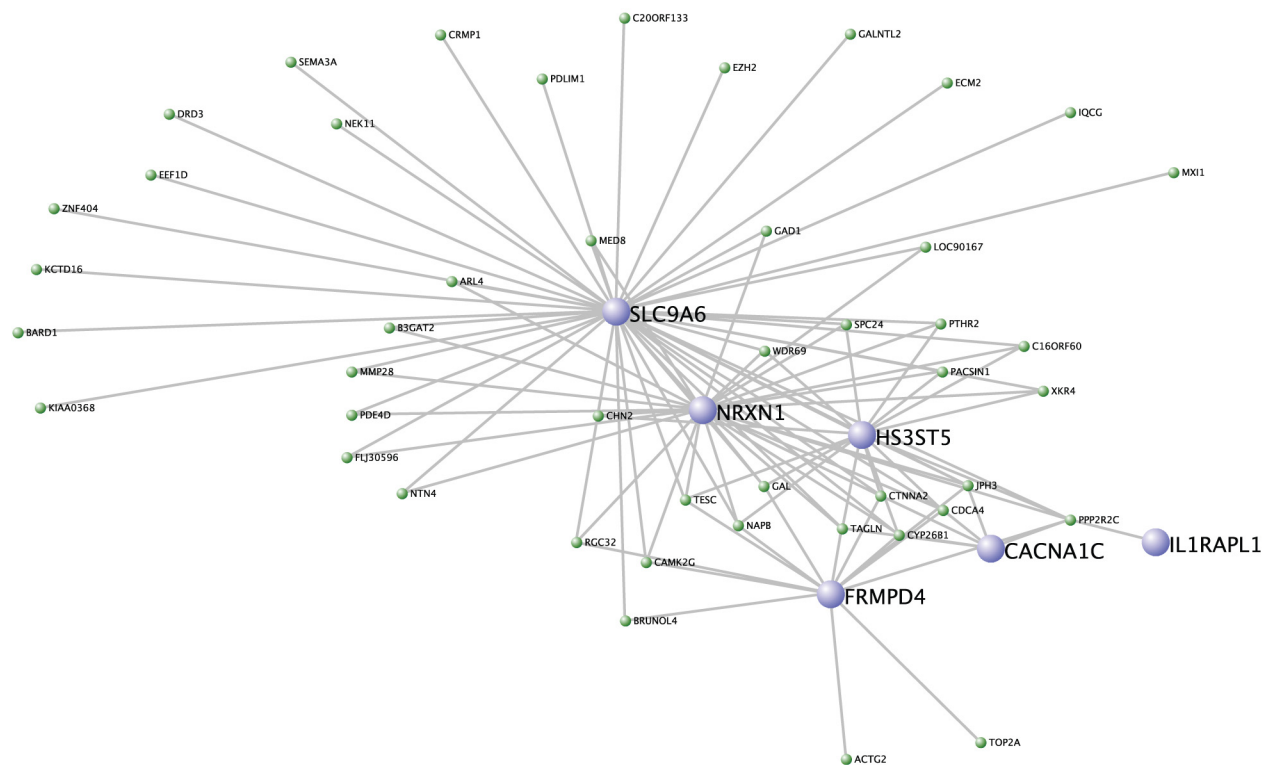

B

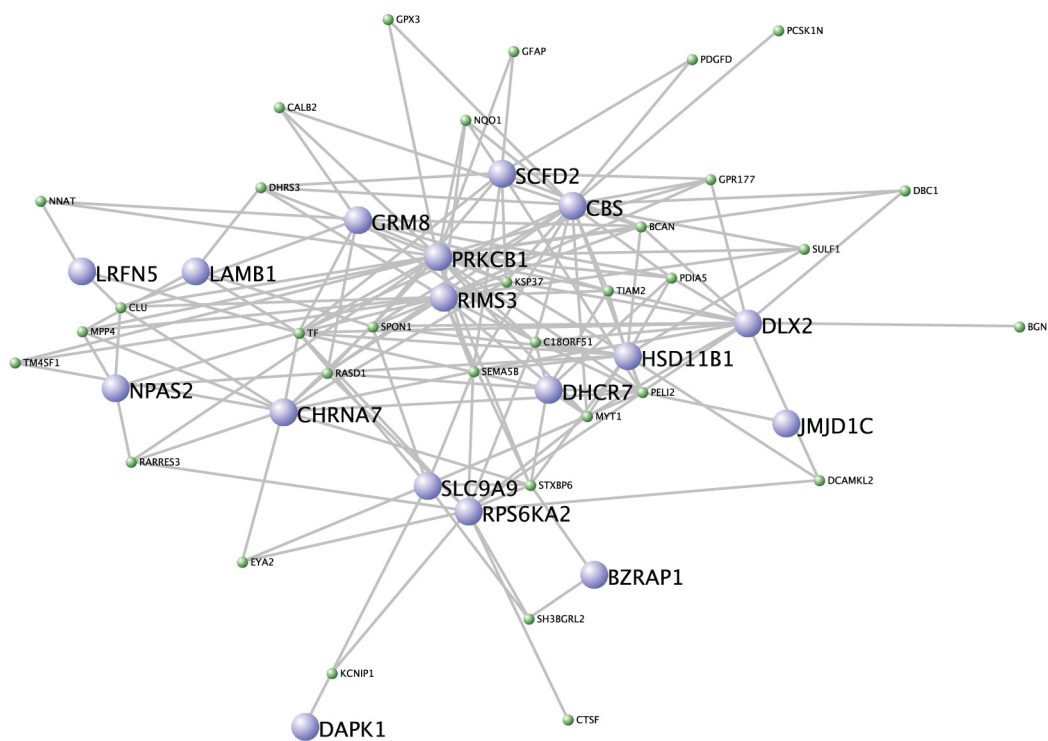

| <b>Supplemental Table 1</b>                                  |                 |            |                  |                                  |
|--------------------------------------------------------------|-----------------|------------|------------------|----------------------------------|
| <b>Cell line characteristics</b>                             |                 |            |                  |                                  |
| <b>Cell Line</b>                                             | <b>Age (GW)</b> | <b>Sex</b> | <b>Race</b>      | <b>Use</b>                       |
| 1                                                            | 17              | Female     | African American | Microarrays; qRT-PCR; genotyping |
| 2                                                            | 19              | Male       | Asian            | ICC; genotyping                  |
| 3                                                            | 17-19           | N/A        | N/A              | ICC                              |
| 4                                                            | 17              | Male       | African American | Growth curves; genotyping        |
| 4.1                                                          | 17              | Male       | African American | Genotyping                       |
| 5                                                            | 17              | Female     | Mixed/unknown    | Genotyping                       |
| GW=gestational week; ICC=immunocytochemistry                 |                 |            |                  |                                  |
| Cell lines 4 and 4.1 are the same line at different passages |                 |            |                  |                                  |

## Supplementary Table 2

## Supplementary Table 2

## Genes differentially expressed after four weeks of differentiation

| ProbeName    | GeneName  | Accession      | Fold   |          | D4 Normalized | T0 Normalized | pValue   | pValueFDR |
|--------------|-----------|----------------|--------|----------|---------------|---------------|----------|-----------|
|              |           |                | Change | LogRatio | Values        | Values        |          |           |
| ILMN_1768425 | TF        | NM_001063.2    | 62.25  | 5.96     | 14.87         | 8.91          | 3.51E-23 | 4.42E-19  |
| ILMN_1748840 | CALB2     | NM_001740.2    | 66.26  | 6.05     | 15.47         | 9.42          | 3.62E-23 | 4.42E-19  |
| ILMN_1726666 | GPX3      | NM_002084.2    | 66.26  | 6.05     | 15.11         | 9.06          | 5.41E-23 | 4.42E-19  |
| ILMN_1761945 | KSP37     | NM_031950.2    | 98.36  | 6.62     | 14.51         | 7.89          | 9.15E-23 | 5.61E-19  |
| ILMN_1752478 | DHRS3     | NM_004753.4    | 138.14 | 7.11     | 14.95         | 7.84          | 1.18E-22 | 5.79E-19  |
| ILMN_2172969 | STXBP6    | NM_014178.6    | 48.17  | 5.59     | 12.84         | 7.25          | 5.07E-22 | 2.07E-18  |
| ILMN_1732154 | BCAN      | NM_021948.3    | 18.77  | 4.23     | 14.7          | 10.47         | 1.36E-21 | 4.76E-18  |
| ILMN_1793006 | TAC3      | NM_001006667.1 | 39.95  | 5.32     | 14.22         | 8.89          | 5.51E-21 | 1.65E-17  |
| ILMN_1689088 | COLEC12   | NM_130386.1    | 66.26  | 6.05     | 13.32         | 7.27          | 6.06E-21 | 1.65E-17  |
| ILMN_1751092 | AMBN      | NM_016519.4    | 11.96  | 3.58     | 12.64         | 9.06          | 2.88E-20 | 7.06E-17  |
| ILMN_1788874 | SERPINA3  | NM_001085.4    | 53.82  | 5.75     | 14.24         | 8.49          | 6.94E-20 | 1.55E-16  |
| ILMN_1789648 | SCGN      | NM_006998.3    | 30.48  | 4.93     | 14.91         | 9.99          | 8.18E-20 | 1.67E-16  |
| ILMN_1740466 | FAM46A    | NM_017633.1    | 11.08  | 3.47     | 13.24         | 9.77          | 1.51E-19 | 2.65E-16  |
| ILMN_1781256 | LEFTY2    | NM_003240.2    | 17.03  | 4.09     | 11.64         | 7.55          | 2.03E-19 | 3.03E-16  |
| ILMN_1701613 | RARRES3   | NM_004585.2    | 15.14  | 3.92     | 15.07         | 11.15         | 2.1E-19  | 3.03E-16  |
| ILMN_1791890 | SPON1     | NM_006108.1    | 16.22  | 4.02     | 14.28         | 10.26         | 3.06E-19 | 4.17E-16  |
| ILMN_1760412 | TMEM46    | NM_001007538.1 | 63.12  | 5.98     | 13.27         | 7.3           | 5.06E-19 | 5.91E-16  |
| ILMN_1656837 | RBP1      | NM_002899.2    | 10.63  | 3.41     | 15.52         | 12.11         | 6.37E-19 | 7.1E-16   |
| ILMN_1772627 | D4S234E   | NM_014392.2    | 11.16  | 3.48     | 13.94         | 10.45         | 7.08E-19 | 7.55E-16  |
| ILMN_1653762 | VMP       | NM_080723.2    | 22.63  | 4.5      | 13.38         | 8.87          | 8.33E-19 | 8.32E-16  |
| ILMN_1687213 | C8ORF13   | NM_053279.1    | 34.78  | 5.12     | 12.88         | 7.76          | 8.48E-19 | 8.32E-16  |
| ILMN_1740426 | RASD1     | NM_016084.3    | 8.57   | 3.1      | 13.4          | 10.31         | 1.05E-18 | 9.74E-16  |
| ILMN_2322996 | EYA2      | NM_172112.1    | 18.00  | 4.17     | 13.86         | 9.69          | 1.39E-18 | 1.14E-15  |
| ILMN_1712708 | TRIM47    | NM_033452.2    | 6.50   | 2.7      | 12.69         | 9.99          | 2.52E-18 | 1.93E-15  |
| ILMN_1719986 | MGC17330  | NM_052880.3    | 7.84   | 2.97     | 13.14         | 10.17         | 3.53E-18 | 2.53E-15  |
| ILMN_1789166 | SHD       | NM_020209.2    | 13.09  | 3.71     | 12.78         | 9.07          | 3.62E-18 | 2.53E-15  |
| ILMN_1762764 | SH3BGRL2  | NM_031469.1    | 8.34   | 3.06     | 11.33         | 8.27          | 4.3E-18  | 2.81E-15  |
| ILMN_2206746 | BGN       | NM_001711.3    | 19.84  | 4.31     | 12.89         | 8.58          | 4.35E-18 | 2.81E-15  |
| ILMN_1685714 | INHBB     | NM_002193.1    | 7.31   | 2.87     | 11.08         | 8.21          | 4.54E-18 | 2.85E-15  |
| ILMN_1767365 | PAK1      | NM_002576.3    | 5.82   | 2.54     | 12.32         | 9.78          | 4.92E-18 | 3.02E-15  |
| ILMN_1798298 | CLU       | NM_203339.1    | 7.26   | 2.86     | 12.01         | 9.15          | 5.3E-18  | 3.09E-15  |
| ILMN_1721540 | LOC284434 | NM_001007525.1 | 12.64  | 3.66     | 10.83         | 7.17          | 7.3E-18  | 4.16E-15  |
| ILMN_1763412 | SKIP      | NM_030623.1    | 8.57   | 3.1      | 11.08         | 7.98          | 8.02E-18 | 4.47E-15  |
| ILMN_1691790 | DACT2     | NM_214462.1    | 16.56  | 4.05     | 11.76         | 7.71          | 9.61E-18 | 5.22E-15  |
| ILMN_2065254 | ELAVL4    | NM_021952.2    | 9.45   | 3.24     | 11.59         | 8.35          | 9.88E-18 | 5.22E-15  |
| ILMN_1669362 | IGFBP6    | NM_002178.2    | 12.47  | 3.64     | 12.6          | 8.96          | 1.1E-17  | 5.51E-15  |
| ILMN_1702363 | SULF1     | NM_015170.1    | 19.84  | 4.31     | 11.69         | 7.39          | 1.16E-17 | 5.68E-15  |

Supplementary Table 2

|              |           |                |       |      |       |       |          |          |
|--------------|-----------|----------------|-------|------|-------|-------|----------|----------|
| ILMN_2131861 | SOCS2     | NM_003877.3    | 5.28  | 2.4  | 13.74 | 11.34 | 1.61E-17 | 7.2E-15  |
| ILMN_1651490 | CYP26A1   | NM_000783.2    | 13.55 | 3.76 | 11.47 | 7.7   | 1.62E-17 | 7.2E-15  |
| ILMN_1813295 | LMO3      | NM_018640.3    | 8.46  | 3.08 | 11.64 | 8.56  | 1.64E-17 | 7.2E-15  |
| ILMN_1794370 | SEMA5B    | NM_001031702.1 | 13.93 | 3.8  | 12.32 | 8.52  | 1.8E-17  | 7.73E-15 |
| ILMN_1716803 | LOC138046 | NM_173848.3    | 8.46  | 3.08 | 10.83 | 7.75  | 1.9E-17  | 8.04E-15 |
| ILMN_1664464 | PTGDS     | NM_000954.5    | 11.16 | 3.48 | 12.59 | 9.11  | 1.94E-17 | 8.05E-15 |
| ILMN_2342271 | BCL11A    | NM_138553.1    | 6.50  | 2.7  | 11.28 | 8.59  | 2.04E-17 | 8.34E-15 |
| ILMN_2389501 | HSD11B1   | NM_181755.1    | 8.82  | 3.14 | 10.57 | 7.44  | 2.17E-17 | 8.72E-15 |
| ILMN_1740938 | APOE      | NM_000041.2    | 7.26  | 2.86 | 15.35 | 12.48 | 2.53E-17 | 1E-14    |
| ILMN_2075067 | DIO3      | NM_001362.2    | 17.75 | 4.15 | 11.87 | 7.71  | 3.15E-17 | 1.23E-14 |
| ILMN_2304495 | PPP1R1B   | NM_181505.1    | 14.32 | 3.84 | 12.59 | 8.75  | 4.05E-17 | 1.53E-14 |
| ILMN_1678710 | PHYHIP1   | NM_032439.1    | 5.98  | 2.58 | 13.48 | 10.9  | 4.92E-17 | 1.82E-14 |
| ILMN_1672605 | ELLS1     | NM_152793.1    | 4.89  | 2.29 | 14.21 | 11.92 | 5.51E-17 | 1.93E-14 |
| ILMN_1777397 | MSX1      | NM_002448.1    | 11.00 | 3.46 | 10.97 | 7.52  | 5.62E-17 | 1.93E-14 |
| ILMN_1721167 | MYT1      | NM_004535.2    | 9.19  | 3.2  | 12.53 | 9.33  | 5.64E-17 | 1.93E-14 |
| ILMN_2358560 | TIAM2     | NM_001010927.2 | 5.62  | 2.49 | 14.27 | 11.78 | 5.73E-17 | 1.93E-14 |
| ILMN_1670718 | C18ORF51  | XM_058931.9    | 4.50  | 2.17 | 13.26 | 11.09 | 6.27E-17 | 2.08E-14 |
| ILMN_1780132 | PELI2     | NM_021255.1    | 5.94  | 2.57 | 12.33 | 9.76  | 6.56E-17 | 2.14E-14 |
| ILMN_2407314 | CYP26A1   | NM_057157.1    | 16.80 | 4.07 | 11.29 | 7.21  | 6.73E-17 | 2.17E-14 |
| ILMN_1656576 | ATCAY     | NM_033064.2    | 4.99  | 2.32 | 11.2  | 8.88  | 6.97E-17 | 2.22E-14 |
| ILMN_1717046 | MOBK12B   | NM_024761.3    | 6.54  | 2.71 | 12.98 | 10.27 | 7.62E-17 | 2.37E-14 |
| ILMN_1719449 | DCAMK12   | NM_152619.1    | 7.67  | 2.94 | 13.61 | 10.66 | 7.84E-17 | 2.4E-14  |
| ILMN_2307903 | VCAM1     | NM_001078.2    | 9.38  | 3.23 | 12.13 | 8.9   | 9.31E-17 | 2.78E-14 |
| ILMN_1775743 | BTG1      | NM_001731.1    | 4.03  | 2.01 | 14.69 | 12.68 | 1.12E-16 | 3.28E-14 |
| ILMN_1734695 | MAP4      | NM_030885.2    | 6.82  | 2.77 | 11.32 | 8.56  | 1.13E-16 | 3.28E-14 |
| ILMN_1717565 | LOC497190 | NM_001011880.1 | 6.41  | 2.68 | 11.14 | 8.46  | 1.14E-16 | 3.28E-14 |
| ILMN_1695763 | PDIA5     | NM_006810.1    | 4.89  | 2.29 | 13    | 10.71 | 1.18E-16 | 3.33E-14 |
| ILMN_1673704 | INA       | NM_032727.2    | 4.92  | 2.3  | 13.56 | 11.25 | 1.2E-16  | 3.35E-14 |
| ILMN_2371458 | CXCR7     | NM_001047841.1 | 7.06  | 2.82 | 10.31 | 7.5   | 1.34E-16 | 3.61E-14 |
| ILMN_1691413 | NNAT      | NM_005386.2    | 6.87  | 2.78 | 14.87 | 12.09 | 1.41E-16 | 3.75E-14 |
| ILMN_2131447 | LRRC3B    | NM_052953.2    | 5.21  | 2.38 | 13.36 | 10.98 | 1.45E-16 | 3.82E-14 |
| ILMN_1666222 | PHACTR3   | NM_080672.3    | 6.41  | 2.68 | 10.49 | 7.81  | 1.69E-16 | 4.27E-14 |
| ILMN_1778523 | KLF9      | NM_001206.2    | 5.31  | 2.41 | 12.14 | 9.72  | 1.75E-16 | 4.38E-14 |
| ILMN_1738684 | NRXN2     | NM_015080.2    | 4.63  | 2.21 | 13.02 | 10.81 | 2.05E-16 | 5.07E-14 |
| ILMN_1781626 | C1S       | NM_001734.2    | 5.98  | 2.58 | 11.6  | 9.02  | 2.21E-16 | 5.38E-14 |
| ILMN_1666444 | LOC648293 | XM_944019.1    | 4.79  | 2.26 | 11.27 | 9.01  | 2.31E-16 | 5.55E-14 |
| ILMN_1798360 | CMKOR1    | NM_020311.1    | 7.52  | 2.91 | 11.13 | 8.22  | 2.78E-16 | 6.49E-14 |
| ILMN_1728803 | HMP19     | NM_015980.3    | 5.43  | 2.44 | 11.42 | 8.98  | 3.35E-16 | 7.6E-14  |
| ILMN_1679984 | ZCCHC12   | NM_173798.2    | 3.46  | 1.79 | 11.46 | 9.67  | 3.51E-16 | 7.89E-14 |
| ILMN_1727815 | CFI       | NM_000204.1    | 5.74  | 2.52 | 13.12 | 10.59 | 3.65E-16 | 8.11E-14 |
| ILMN_1782944 | GPR37L1   | NM_004767.2    | 11.79 | 3.56 | 12.45 | 8.88  | 3.67E-16 | 8.11E-14 |
| ILMN_1757338 | PLSCR4    | NM_020353.1    | 6.68  | 2.74 | 12.27 | 9.53  | 3.74E-16 | 8.18E-14 |
| ILMN_2310814 | MAPT      | NM_016841.2    | 4.86  | 2.28 | 14.43 | 12.15 | 3.85E-16 | 8.35E-14 |



Supplementary Table 2

|              |           |                |       |      |       |       |          |          |
|--------------|-----------|----------------|-------|------|-------|-------|----------|----------|
| ILMN_2413833 | TNRC9     | NM_001080430.1 | 8.17  | 3.03 | 12.56 | 9.53  | 3.88E-16 | 8.35E-14 |
| ILMN_1717639 | SNF1LK    | NM_173354.2    | 4.26  | 2.09 | 10.65 | 8.56  | 3.96E-16 | 8.45E-14 |
| ILMN_1678618 | ELAVL3    | NM_001420.3    | 4.50  | 2.17 | 13.2  | 11.04 | 4.36E-16 | 9.13E-14 |
| ILMN_1776936 | ANKRD38   | NM_181712.2    | 6.68  | 2.74 | 11.09 | 8.35  | 4.72E-16 | 9.8E-14  |
| ILMN_1656300 | GFRA2     | NM_001495.4    | 14.03 | 3.81 | 13.47 | 9.66  | 5.46E-16 | 1.13E-13 |
| ILMN_2361603 | NDRG2     | NM_201539.1    | 5.86  | 2.55 | 12.81 | 10.27 | 5.65E-16 | 1.15E-13 |
| ILMN_1756715 | RPIP8     | NM_006695.3    | 6.96  | 2.8  | 12    | 9.21  | 5.9E-16  | 1.2E-13  |
| ILMN_1688184 | CSPG5     | NM_006574.2    | 5.98  | 2.58 | 13.94 | 11.36 | 5.95E-16 | 1.2E-13  |
| ILMN_2346339 | FOLR1     | NM_016724.1    | 7.31  | 2.87 | 11.39 | 8.52  | 6.16E-16 | 1.23E-13 |
| ILMN_1782050 | CEBPD     | NM_005195.2    | 5.24  | 2.39 | 13.42 | 11.03 | 6.48E-16 | 1.28E-13 |
| ILMN_1701933 | SNCA      | NM_007308.1    | 4.29  | 2.1  | 12.44 | 10.35 | 6.8E-16  | 1.33E-13 |
| ILMN_2197946 | SCG3      | NM_013243.2    | 5.43  | 2.44 | 12.81 | 10.37 | 7.12E-16 | 1.38E-13 |
| ILMN_1700547 | CHST9     | NM_031422.1    | 7.89  | 2.98 | 10.93 | 7.95  | 7.17E-16 | 1.38E-13 |
| ILMN_2165354 | DCAMKL1   | NM_004734.2    | 3.84  | 1.94 | 14.68 | 12.75 | 7.21E-16 | 1.38E-13 |
| ILMN_2326273 | CHI3L2    | NM_004000.2    | 10.70 | 3.42 | 10.96 | 7.54  | 7.31E-16 | 1.39E-13 |
| ILMN_1657451 | SRPK2     | NM_182691.1    | 3.51  | 1.81 | 12.39 | 10.59 | 7.4E-16  | 1.4E-13  |
| ILMN_1667295 | SLITL2    | NM_138440.1    | 3.84  | 1.94 | 13.56 | 11.63 | 7.71E-16 | 1.43E-13 |
| ILMN_1797668 | INSM1     | NM_002196.2    | 3.86  | 1.95 | 14.36 | 12.41 | 7.83E-16 | 1.44E-13 |
| ILMN_1747499 | EMID1     | NM_133455.2    | 6.87  | 2.78 | 10.33 | 7.54  | 9.08E-16 | 1.66E-13 |
| ILMN_1748281 | MAPK10    | NM_138980.1    | 3.92  | 1.97 | 12.74 | 10.77 | 9.64E-16 | 1.74E-13 |
| ILMN_2230025 | PDLIM3    | NM_014476.1    | 4.59  | 2.2  | 12.95 | 10.75 | 9.79E-16 | 1.75E-13 |
| ILMN_1758673 | SLC44A1   | NM_022109.2    | 4.53  | 2.18 | 13.56 | 11.38 | 1.07E-15 | 1.9E-13  |
| ILMN_1700248 | LOC349136 | NM_198285.1    | 5.46  | 2.45 | 12.44 | 9.99  | 1.13E-15 | 1.97E-13 |
| ILMN_1779448 | EFHD1     | NM_025202.2    | 5.28  | 2.4  | 12.44 | 10.04 | 1.13E-15 | 1.97E-13 |
| ILMN_2094856 | RANBP3L   | NM_145000.2    | 7.16  | 2.84 | 10.07 | 7.23  | 1.15E-15 | 1.98E-13 |
| ILMN_2380237 | C1QTNF1   | NM_198594.1    | 10.78 | 3.43 | 13.6  | 10.17 | 1.17E-15 | 2.01E-13 |
| ILMN_2237252 | LY6H      | NM_002347.2    | 7.52  | 2.91 | 13.37 | 10.46 | 1.19E-15 | 2.02E-13 |
| ILMN_1659800 | BCL11A    | NM_138559.1    | 6.06  | 2.6  | 10.28 | 7.68  | 1.19E-15 | 2.02E-13 |
| ILMN_2173500 | C18ORF51  | NM_001044369.1 | 4.17  | 2.06 | 12.73 | 10.67 | 1.21E-15 | 2.04E-13 |
| ILMN_1713124 | AKR1C3    | NM_003739.4    | 5.74  | 2.52 | 10.08 | 7.56  | 1.39E-15 | 2.29E-13 |
| ILMN_2246131 | BCAN      | NM_198427.1    | 6.15  | 2.62 | 11.41 | 8.78  | 1.57E-15 | 2.57E-13 |
| ILMN_1741603 | DBC1      | NM_014618.1    | 3.76  | 1.91 | 13.91 | 12    | 1.73E-15 | 2.77E-13 |
| ILMN_1791280 | HSPB8     | NM_014365.2    | 13.36 | 3.74 | 11.3  | 7.56  | 1.9E-15  | 3E-13    |
| ILMN_1674009 | TKTL1     | NM_012253.2    | 11.88 | 3.57 | 11.99 | 8.42  | 1.94E-15 | 3.05E-13 |
| ILMN_1776602 | RNASE4    | NM_002937.3    | 5.98  | 2.58 | 11.27 | 8.69  | 2.01E-15 | 3.14E-13 |
| ILMN_1755582 | PCSK1N    | NM_013271.2    | 4.00  | 2    | 13.8  | 11.8  | 2.26E-15 | 3.49E-13 |
| ILMN_2361096 | DCX       | NM_178151.1    | 3.61  | 1.85 | 14.02 | 12.17 | 2.29E-15 | 3.49E-13 |
| ILMN_2126038 | STMN2     | NM_007029.2    | 6.77  | 2.76 | 13.08 | 10.32 | 2.49E-15 | 3.7E-13  |
| ILMN_2330382 | PAQR6     | NM_198406.1    | 4.26  | 2.09 | 11.71 | 9.63  | 2.51E-15 | 3.71E-13 |
| ILMN_1697512 | SLC32A1   | NM_080552.2    | 3.32  | 1.73 | 12.88 | 11.15 | 2.69E-15 | 3.93E-13 |
| ILMN_1731237 | CLSTN2    | NM_022131.1    | 13.09 | 3.71 | 12.49 | 8.78  | 2.76E-15 | 3.99E-13 |
| ILMN_2358540 | RBMS1     | NM_002897.3    | 4.29  | 2.1  | 10.45 | 8.34  | 2.81E-15 | 4.02E-13 |
| ILMN_1739235 | OMG       | NM_002544.3    | 10.34 | 3.37 | 12.11 | 8.74  | 2.84E-15 | 4.06E-13 |

Supplementary Table 2

|              |          |                |       |      |       |       |          |          |
|--------------|----------|----------------|-------|------|-------|-------|----------|----------|
| ILMN_1734929 | BBOX1    | NM_003986.1    | 3.68  | 1.88 | 13.08 | 11.21 | 3E-15    | 4.21E-13 |
| ILMN_1674135 | RALGPS1  | NM_014636.1    | 3.94  | 1.98 | 11.9  | 9.92  | 3.03E-15 | 4.22E-13 |
| ILMN_2406184 | TAC3     | NM_013251.2    | 10.20 | 3.35 | 11.87 | 8.52  | 3.13E-15 | 4.34E-13 |
| ILMN_1662963 | PSD2     | NM_032289.1    | 6.41  | 2.68 | 11.12 | 8.44  | 3.17E-15 | 4.36E-13 |
| ILMN_1767068 | SMAD6    | NM_005585.2    | 10.34 | 3.37 | 11.01 | 7.64  | 3.38E-15 | 4.6E-13  |
| ILMN_1701783 | DCT      | NM_001922.2    | 9.19  | 3.2  | 10.86 | 7.66  | 3.44E-15 | 4.63E-13 |
| ILMN_1730818 | C19ORF30 | NM_174947.2    | 9.85  | 3.3  | 11.18 | 7.88  | 3.77E-15 | 5.01E-13 |
| ILMN_1810550 | BAIAP3   | NM_003933.3    | 6.36  | 2.67 | 9.91  | 7.25  | 3.78E-15 | 5.01E-13 |
| ILMN_2407434 | DCAMKL2  | NM_001040260.1 | 7.78  | 2.96 | 13.24 | 10.28 | 3.98E-15 | 5.25E-13 |
| ILMN_1651498 | GADD45G  | NM_006705.2    | 6.59  | 2.72 | 11.56 | 8.84  | 4.5E-15  | 5.88E-13 |
| ILMN_1661733 | FOLR1    | NM_016724.1    | 7.06  | 2.82 | 11.17 | 8.35  | 4.75E-15 | 6.17E-13 |
| ILMN_1730546 | GNAO1    | NM_020988.1    | 4.41  | 2.14 | 11.46 | 9.32  | 5.02E-15 | 6.45E-13 |
| ILMN_1784749 | GAS6     | XM_942084.1    | 3.73  | 1.9  | 11.71 | 9.81  | 5.1E-15  | 6.51E-13 |
| ILMN_1655796 | 3-MAR    | XM_938009.1    | 4.44  | 2.15 | 11.99 | 9.84  | 5.19E-15 | 6.59E-13 |
| ILMN_1658498 | SLC44A3  | NM_152369.2    | 5.82  | 2.54 | 11.56 | 9.03  | 5.36E-15 | 6.78E-13 |
| ILMN_1665761 | BCL11B   | NM_022898.1    | 7.52  | 2.91 | 10.82 | 7.91  | 5.52E-15 | 6.88E-13 |
| ILMN_1659953 | 3-SEP    | NM_019106.4    | 3.34  | 1.74 | 13.83 | 12.09 | 5.92E-15 | 7.3E-13  |
| ILMN_1758461 | ST8SIA2  | NM_006011.3    | 4.32  | 2.11 | 12.2  | 10.09 | 5.93E-15 | 7.3E-13  |
| ILMN_2376953 | KCNK2    | NM_001017425.2 | 6.41  | 2.68 | 10.74 | 8.06  | 6.06E-15 | 7.43E-13 |
| ILMN_1693912 | FLJ31196 | NM_152908.2    | 6.11  | 2.61 | 11.55 | 8.94  | 6.8E-15  | 8.17E-13 |
| ILMN_1660501 | LY6H     | XM_937329.1    | 7.78  | 2.96 | 13.28 | 10.32 | 7.96E-15 | 9.39E-13 |
| ILMN_1657855 | ACTL6B   | NM_016188.3    | 7.11  | 2.83 | 11.12 | 8.29  | 8.37E-15 | 9.69E-13 |
| ILMN_1691884 | STC2     | NM_003714.2    | 6.06  | 2.6  | 10.95 | 8.35  | 8.49E-15 | 9.74E-13 |
| ILMN_1800317 | WNT5A    | NM_003392.3    | 7.84  | 2.97 | 10.53 | 7.55  | 8.81E-15 | 1.01E-12 |
| ILMN_1732410 | SLC16A9  | NM_194298.1    | 4.35  | 2.12 | 13.58 | 11.46 | 1.02E-14 | 1.14E-12 |
| ILMN_1700183 | AGTRL1   | NM_005161.2    | 4.63  | 2.21 | 9.69  | 7.48  | 1.04E-14 | 1.15E-12 |
| ILMN_1655261 | C12ORF46 | NM_152321.1    | 5.10  | 2.35 | 9.61  | 7.26  | 1.05E-14 | 1.16E-12 |
| ILMN_1807969 | SNCAIP   | NM_005460.2    | 3.12  | 1.64 | 13    | 11.36 | 1.08E-14 | 1.19E-12 |
| ILMN_1803094 | PDGFD    | NM_025208.3    | 5.62  | 2.49 | 11.95 | 9.46  | 1.08E-14 | 1.19E-12 |
| ILMN_1671151 | RARB     | NM_000965.2    | 6.82  | 2.77 | 10.03 | 7.26  | 1.1E-14  | 1.21E-12 |
| ILMN_1727360 | MAOB     | NM_000898.3    | 7.89  | 2.98 | 11.3  | 8.33  | 1.17E-14 | 1.26E-12 |
| ILMN_1737631 | PAQR6    | NM_024897.2    | 4.44  | 2.15 | 12.23 | 10.08 | 1.19E-14 | 1.27E-12 |
| ILMN_2081087 | HSPA12A  | NM_025015.2    | 3.29  | 1.72 | 13.22 | 11.49 | 1.24E-14 | 1.3E-12  |
| ILMN_2132982 | IGFBP5   | NM_000599.2    | 4.69  | 2.23 | 13.05 | 10.82 | 1.24E-14 | 1.3E-12  |
| ILMN_2407389 | GNPMB    | NM_002510.2    | 3.92  | 1.97 | 10.44 | 8.47  | 1.26E-14 | 1.32E-12 |
| ILMN_1680624 | CREG1    | NM_003851.2    | 3.20  | 1.68 | 12.17 | 10.49 | 1.34E-14 | 1.39E-12 |
| ILMN_1766054 | ABCA1    | NM_005502.2    | 3.78  | 1.92 | 14.99 | 13.07 | 1.34E-14 | 1.39E-12 |
| ILMN_1804955 | CTSF     | NM_003793.2    | 3.12  | 1.64 | 12.46 | 10.83 | 1.36E-14 | 1.41E-12 |
| ILMN_2283325 | GPR177   | NM_024911.4    | 2.97  | 1.57 | 14.81 | 13.24 | 1.37E-14 | 1.41E-12 |
| ILMN_1684758 | ETFB     | NM_001014763.1 | 4.82  | 2.27 | 9.74  | 7.47  | 1.43E-14 | 1.46E-12 |
| ILMN_1699644 | 3-MAR    | NM_178450.2    | 3.97  | 1.99 | 11.89 | 9.9   | 1.43E-14 | 1.46E-12 |
| ILMN_1677198 | C1R      | NM_001733.4    | 3.68  | 1.88 | 11.88 | 9.99  | 1.48E-14 | 1.5E-12  |
| ILMN_1814917 | TLE2     | NM_003260.3    | 4.47  | 2.16 | 11.54 | 9.38  | 1.56E-14 | 1.57E-12 |

Supplementary Table 2

|              |           |             |      |      |       |       |          |          |
|--------------|-----------|-------------|------|------|-------|-------|----------|----------|
| ILMN_2347592 | NMB       | NM_021077.3 | 5.78 | 2.53 | 13.68 | 11.15 | 1.59E-14 | 1.58E-12 |
| ILMN_1812841 | C8ORF34   | NM_052958.1 | 4.14 | 2.05 | 10.53 | 8.47  | 1.59E-14 | 1.58E-12 |
| ILMN_1800225 | PPARG     | NM_138712.3 | 4.32 | 2.11 | 10.42 | 8.32  | 1.86E-14 | 1.84E-12 |
| ILMN_2195821 | LOC153222 | NM_153607.1 | 3.86 | 1.95 | 11.27 | 9.32  | 1.86E-14 | 1.84E-12 |
| ILMN_1810191 | PLA2G4C   | NM_003706.1 | 3.56 | 1.83 | 10.98 | 9.15  | 1.94E-14 | 1.9E-12  |
| ILMN_1701643 | GDPD5     | NM_030792.4 | 4.89 | 2.29 | 12.11 | 9.82  | 1.98E-14 | 1.92E-12 |
| ILMN_1697448 | TXNIP     | NM_006472.1 | 4.06 | 2.02 | 13.46 | 11.44 | 2.05E-14 | 1.99E-12 |
| ILMN_2316878 | PTPRO     | NM_030671.1 | 6.63 | 2.73 | 11.47 | 8.74  | 2.06E-14 | 1.99E-12 |
| ILMN_1765966 | CHGB      | NM_001819.1 | 5.46 | 2.45 | 11.87 | 9.42  | 2.09E-14 | 2.01E-12 |
| ILMN_1668072 | PGAM2     | NM_000290.2 | 4.76 | 2.25 | 9.97  | 7.72  | 2.13E-14 | 2.03E-12 |
| ILMN_1778575 | WNT7A     | NM_004625.3 | 3.66 | 1.87 | 9.54  | 7.67  | 2.13E-14 | 2.03E-12 |
| ILMN_1755221 | LMAN2L    | NM_030805.1 | 2.85 | 1.51 | 13.52 | 12.01 | 2.22E-14 | 2.1E-12  |
| ILMN_1701827 | IGSF4B    | NM_021189.2 | 8.28 | 3.05 | 11.24 | 8.19  | 2.28E-14 | 2.12E-12 |
| ILMN_1718949 | SLC39A12  | NM_152725.1 | 3.68 | 1.88 | 10.58 | 8.7   | 2.42E-14 | 2.24E-12 |
| ILMN_2233783 | CD38      | NM_001775.2 | 6.45 | 2.69 | 10.33 | 7.64  | 2.46E-14 | 2.27E-12 |
| ILMN_1801703 | CPLX1     | NM_006651.3 | 6.54 | 2.71 | 10.5  | 7.79  | 2.56E-14 | 2.34E-12 |
| ILMN_1800381 | GNAO1     | NM_138736.1 | 3.63 | 1.86 | 10.85 | 8.99  | 2.62E-14 | 2.39E-12 |
| ILMN_1752299 | RAB6B     | NM_016577.2 | 3.12 | 1.64 | 13.05 | 11.41 | 2.68E-14 | 2.44E-12 |
| ILMN_1750373 | KAL1      | NM_000216.1 | 6.68 | 2.74 | 12.02 | 9.28  | 2.73E-14 | 2.47E-12 |
| ILMN_2255133 | BCL11A    | NM_022893.2 | 6.32 | 2.66 | 11.6  | 8.94  | 2.76E-14 | 2.48E-12 |
| ILMN_1740555 | SNAP25    | NM_003081.2 | 3.27 | 1.71 | 12.31 | 10.6  | 2.91E-14 | 2.59E-12 |
| ILMN_1667711 | HRASLS3   | NM_007069.1 | 3.10 | 1.63 | 14.34 | 12.71 | 2.94E-14 | 2.61E-12 |
| ILMN_1695945 | MEIS2     | NM_020149.2 | 2.85 | 1.51 | 14.4  | 12.89 | 2.97E-14 | 2.62E-12 |
| ILMN_1747271 | ATP1B2    | NM_001678.3 | 3.53 | 1.82 | 13.44 | 11.62 | 3.16E-14 | 2.75E-12 |
| ILMN_1679051 | PTPRR     | NM_002849.2 | 4.35 | 2.12 | 9.57  | 7.45  | 3.48E-14 | 3.01E-12 |
| ILMN_1733860 | SYNPR     | NM_144642.3 | 9.92 | 3.31 | 12.61 | 9.3   | 3.53E-14 | 3.01E-12 |
| ILMN_2376859 | PDGFD     | NM_025208.4 | 6.15 | 2.62 | 11.71 | 9.09  | 3.54E-14 | 3.01E-12 |
| ILMN_2408572 | RNASE4    | NM_194430.1 | 4.99 | 2.32 | 10.52 | 8.2   | 3.58E-14 | 3.04E-12 |
| ILMN_2060413 | CD24      | NM_013230.2 | 2.68 | 1.42 | 15.45 | 14.03 | 3.62E-14 | 3.05E-12 |
| ILMN_1760727 | ANG       | NM_001145.2 | 4.44 | 2.15 | 10.85 | 8.7   | 3.66E-14 | 3.08E-12 |
| ILMN_1682326 | PCP4      | NM_006198.2 | 5.24 | 2.39 | 12.25 | 9.86  | 3.83E-14 | 3.19E-12 |
| ILMN_2376403 | TSC2D3    | NM_004089.3 | 3.27 | 1.71 | 11.15 | 9.44  | 3.88E-14 | 3.23E-12 |
| ILMN_1753241 | SNTA1     | NM_003098.2 | 3.76 | 1.91 | 11.48 | 9.57  | 3.9E-14  | 3.23E-12 |
| ILMN_2413779 | SEZ6L2    | NM_201575.1 | 3.05 | 1.61 | 11.64 | 10.03 | 3.91E-14 | 3.23E-12 |
| ILMN_1794190 | CCPG1     | NM_004748.3 | 3.71 | 1.89 | 12.79 | 10.9  | 4E-14    | 3.29E-12 |
| ILMN_1714523 | HEPH      | NM_138737.1 | 4.82 | 2.27 | 9.47  | 7.21  | 4.03E-14 | 3.3E-12  |
| ILMN_1724162 | ARX       | NM_139058.1 | 4.03 | 2.01 | 12.02 | 10.01 | 4.65E-14 | 3.72E-12 |
| ILMN_1728742 | C5ORF4    | NM_016348.1 | 5.58 | 2.48 | 11.16 | 8.68  | 4.69E-14 | 3.75E-12 |
| ILMN_1681234 | TNRC4     | NM_007185.3 | 7.41 | 2.89 | 11.96 | 9.07  | 5.16E-14 | 4.07E-12 |
| ILMN_1726549 | GDPD2     | NM_017711.2 | 4.00 | 2    | 10.82 | 8.83  | 5.27E-14 | 4.13E-12 |
| ILMN_1779558 | GAS6      | NM_000820.1 | 3.63 | 1.86 | 11.69 | 9.83  | 5.42E-14 | 4.22E-12 |
| ILMN_2182148 | C2ORF32   | NM_015463.1 | 3.32 | 1.73 | 11.9  | 10.17 | 5.66E-14 | 4.38E-12 |
| ILMN_1661940 | CAMTA1    | NM_015215.1 | 3.20 | 1.68 | 11.85 | 10.18 | 5.72E-14 | 4.41E-12 |

Supplementary Table 2

|              |           |                |      |      |       |       |          |          |
|--------------|-----------|----------------|------|------|-------|-------|----------|----------|
| ILMN_2359710 | PTP4A3    | NM_007079.2    | 3.71 | 1.89 | 11.62 | 9.73  | 6.12E-14 | 4.63E-12 |
| ILMN_2389506 | HSD11B1   | NM_181755.1    | 5.66 | 2.5  | 10.13 | 7.63  | 6.2E-14  | 4.65E-12 |
| ILMN_1671891 | FLJ20701  | NM_017933.3    | 3.58 | 1.84 | 11.7  | 9.86  | 6.36E-14 | 4.75E-12 |
| ILMN_1741219 | RRAGB     | NM_006064.3    | 2.81 | 1.49 | 12.59 | 11.11 | 6.39E-14 | 4.76E-12 |
| ILMN_1800787 | RAFTLIN   | NM_015150.1    | 2.57 | 1.36 | 14.49 | 13.13 | 6.55E-14 | 4.85E-12 |
| ILMN_1672124 | C4ORF18   | NM_016613.4    | 3.84 | 1.94 | 11.31 | 9.38  | 6.66E-14 | 4.92E-12 |
| ILMN_1663080 | LFNG      | NM_002304.1    | 3.29 | 1.72 | 12.87 | 11.14 | 6.74E-14 | 4.95E-12 |
| ILMN_1746013 | SPOCK     | NM_004598.2    | 2.99 | 1.58 | 12.53 | 10.95 | 7.17E-14 | 5.18E-12 |
| ILMN_1697433 | CYP46A1   | NM_006668.1    | 5.13 | 2.36 | 11.35 | 8.98  | 7.31E-14 | 5.24E-12 |
| ILMN_1812297 | CYP26B1   | NM_019885.2    | 4.79 | 2.26 | 10.36 | 8.11  | 7.59E-14 | 5.41E-12 |
| ILMN_1764709 | MAFB      | NM_005461.3    | 3.23 | 1.69 | 11.14 | 9.45  | 7.66E-14 | 5.45E-12 |
| ILMN_1720496 | GUCY1A2   | NM_000855.1    | 4.00 | 2    | 9.69  | 7.69  | 8E-14    | 5.64E-12 |
| ILMN_1682463 | LOC283174 | NM_001001873.2 | 3.51 | 1.81 | 10.48 | 8.67  | 8.05E-14 | 5.65E-12 |
| ILMN_1699631 | GATS      | NM_178831.4    | 3.10 | 1.63 | 12.64 | 11.01 | 8.29E-14 | 5.79E-12 |
| ILMN_2367384 | EPHB2     | NM_004442.6    | 3.58 | 1.84 | 11.23 | 9.39  | 8.39E-14 | 5.85E-12 |
| ILMN_1812795 | RUNX1T1   | NM_175636.1    | 5.24 | 2.39 | 10.96 | 8.58  | 8.89E-14 | 6.18E-12 |
| ILMN_1813530 | AGT       | NM_000029.2    | 3.66 | 1.87 | 11.55 | 9.67  | 9.17E-14 | 6.35E-12 |
| ILMN_1772446 | C12ORF34  | NM_032829.1    | 3.16 | 1.66 | 11.04 | 9.37  | 1.04E-13 | 7.12E-12 |
| ILMN_1770938 | PAK7      | NM_020341.2    | 5.35 | 2.42 | 10.71 | 8.29  | 1.08E-13 | 7.33E-12 |
| ILMN_1744487 | C1QTNF5   | NM_015645.2    | 2.91 | 1.54 | 12.11 | 10.57 | 1.1E-13  | 7.43E-12 |
| ILMN_1756541 | MXD4      | NM_006454.2    | 2.79 | 1.48 | 14.52 | 13.04 | 1.15E-13 | 7.71E-12 |
| ILMN_1805395 | LTBP3     | NM_021070.2    | 6.15 | 2.62 | 12.75 | 10.14 | 1.17E-13 | 7.78E-12 |
| ILMN_1787981 | MFAP2     | NM_017459.1    | 5.74 | 2.52 | 10.31 | 7.78  | 1.17E-13 | 7.81E-12 |
| ILMN_1654946 | ZNF447    | NM_023926.3    | 2.79 | 1.48 | 14.36 | 12.88 | 1.21E-13 | 8.02E-12 |
| ILMN_1728298 | SBK1      | NM_001024401.2 | 3.03 | 1.6  | 14.02 | 12.42 | 1.24E-13 | 8.16E-12 |
| ILMN_1813639 | C20ORF58  | NM_152864.2    | 7.06 | 2.82 | 11.37 | 8.55  | 1.26E-13 | 8.23E-12 |
| ILMN_1815745 | SOX4      | NM_003107.2    | 3.81 | 1.93 | 13.71 | 11.78 | 1.3E-13  | 8.5E-12  |
| ILMN_2323508 | C9ORF58   | NM_001002260.1 | 3.01 | 1.59 | 12.68 | 11.09 | 1.32E-13 | 8.58E-12 |
| ILMN_1760246 | BSN       | NM_003458.1    | 3.78 | 1.92 | 11.34 | 9.41  | 1.34E-13 | 8.69E-12 |
| ILMN_1785892 | MASP1     | NM_001031849.1 | 5.28 | 2.4  | 10.41 | 8.01  | 1.41E-13 | 9.09E-12 |
| ILMN_2148469 | RASL11B   | NM_023940.2    | 4.38 | 2.13 | 10.94 | 8.81  | 1.41E-13 | 9.1E-12  |
| ILMN_1801441 | C2ORF11   | NM_144629.1    | 2.97 | 1.57 | 13.42 | 11.85 | 1.52E-13 | 9.67E-12 |
| ILMN_1770725 | C9ORF58   | NM_031426.2    | 2.68 | 1.42 | 13.09 | 11.67 | 1.62E-13 | 1.02E-11 |
| ILMN_2227757 | PCDHB2    | NM_018936.2    | 2.35 | 1.23 | 12.46 | 11.23 | 1.63E-13 | 1.03E-11 |
| ILMN_1714397 | CRYL1     | NM_015974.1    | 2.73 | 1.45 | 11.78 | 10.33 | 1.63E-13 | 1.03E-11 |
| ILMN_1795338 | YPEL1     | NM_013313.3    | 3.16 | 1.66 | 11.8  | 10.14 | 1.79E-13 | 1.12E-11 |
| ILMN_1733648 | SNAP91    | NM_014841.1    | 5.13 | 2.36 | 11.19 | 8.82  | 1.81E-13 | 1.13E-11 |
| ILMN_1714444 | KLF12     | NM_007249.3    | 3.34 | 1.74 | 11.6  | 9.86  | 1.89E-13 | 1.17E-11 |
| ILMN_1812946 | GPR88     | NM_022049.1    | 5.24 | 2.39 | 10.28 | 7.89  | 2.02E-13 | 1.24E-11 |
| ILMN_1795762 | PLEK      | NM_002664.1    | 7.06 | 2.82 | 10.43 | 7.61  | 2.05E-13 | 1.26E-11 |
| ILMN_1702899 | PLEKHA7   | NM_175058.3    | 3.20 | 1.68 | 10.71 | 9.03  | 2.06E-13 | 1.26E-11 |
| ILMN_1733627 | NEDD4L    | NM_015277.2    | 4.44 | 2.15 | 13.63 | 11.48 | 2.45E-13 | 1.47E-11 |
| ILMN_1659950 | APC2      | NM_005883.2    | 4.89 | 2.29 | 11.54 | 9.25  | 2.47E-13 | 1.48E-11 |

Supplementary Table 2

|              |           |                |      |      |       |       |          |          |
|--------------|-----------|----------------|------|------|-------|-------|----------|----------|
| ILMN_2224907 | C4ORF34   | NM_174921.1    | 2.71 | 1.44 | 12.91 | 11.47 | 2.53E-13 | 1.51E-11 |
| ILMN_1730777 | KRT19     | NM_002276.3    | 3.32 | 1.73 | 9.09  | 7.36  | 2.58E-13 | 1.54E-11 |
| ILMN_1768758 | CACNG3    | NM_006539.2    | 4.66 | 2.22 | 9.8   | 7.58  | 2.59E-13 | 1.54E-11 |
| ILMN_1801205 | GPNMB     | NM_001005340.1 | 5.06 | 2.34 | 11.36 | 9.02  | 2.59E-13 | 1.54E-11 |
| ILMN_1764780 | SVOP      | NM_018711.2    | 3.63 | 1.86 | 9.59  | 7.73  | 2.76E-13 | 1.62E-11 |
| ILMN_1805104 | ABAT      | NM_020686.3    | 2.51 | 1.33 | 12.16 | 10.84 | 2.96E-13 | 1.72E-11 |
| ILMN_1786278 | DKFZP564J | NM_015398.1    | 3.66 | 1.87 | 11.14 | 9.27  | 2.99E-13 | 1.73E-11 |
| ILMN_1803945 | HCP5      | NM_006674.2    | 4.20 | 2.07 | 10.93 | 8.85  | 3.01E-13 | 1.74E-11 |
| ILMN_1745034 | SLC11A2   | NM_000617.1    | 2.71 | 1.44 | 13.4  | 11.97 | 3.03E-13 | 1.74E-11 |
| ILMN_1765310 | TCEAL2    | NM_080390.3    | 2.64 | 1.4  | 11.56 | 10.16 | 3.1E-13  | 1.78E-11 |
| ILMN_1697176 | GFAP      | NM_002055.2    | 2.62 | 1.39 | 15.47 | 14.08 | 3.18E-13 | 1.82E-11 |
| ILMN_1685056 | FLRT1     | NM_013280.4    | 4.06 | 2.02 | 9.97  | 7.95  | 3.19E-13 | 1.83E-11 |
| ILMN_2343097 | NCALD     | NM_001040626.1 | 2.68 | 1.42 | 11.73 | 10.31 | 3.28E-13 | 1.87E-11 |
| ILMN_2400644 | SRGAP3    | NM_001033117.1 | 2.83 | 1.5  | 12.4  | 10.9  | 3.31E-13 | 1.88E-11 |
| ILMN_1722290 | PRG2      | NM_024888.1    | 5.90 | 2.56 | 10.08 | 7.52  | 3.51E-13 | 1.99E-11 |
| ILMN_1661599 | DDIT4     | NM_019058.2    | 2.64 | 1.4  | 13.37 | 11.97 | 3.59E-13 | 2.03E-11 |
| ILMN_1809456 | CNTFR     | NM_147164.1    | 2.68 | 1.42 | 13.12 | 11.7  | 3.81E-13 | 2.15E-11 |
| ILMN_2073289 | MTSS1     | NM_014751.2    | 2.99 | 1.58 | 13.59 | 12.01 | 3.95E-13 | 2.22E-11 |
| ILMN_1657347 | PODXL2    | NM_015720.1    | 2.48 | 1.31 | 12.88 | 11.56 | 4E-13    | 2.24E-11 |
| ILMN_1693401 | BTBD5     | NM_017658.2    | 3.61 | 1.85 | 11.89 | 10.04 | 4.02E-13 | 2.24E-11 |
| ILMN_1693471 | FLJ33790  | NM_173583.1    | 5.66 | 2.5  | 11.63 | 9.13  | 4.07E-13 | 2.26E-11 |
| ILMN_1707734 | NNAT      | NM_005386.2    | 3.84 | 1.94 | 11.31 | 9.36  | 4.07E-13 | 2.26E-11 |
| ILMN_2340131 | MAPK10    | NM_138980.1    | 3.53 | 1.82 | 10.87 | 9.05  | 4.18E-13 | 2.31E-11 |
| ILMN_2240866 | MASP1     | NM_001031849.1 | 7.36 | 2.88 | 10.95 | 8.07  | 4.26E-13 | 2.34E-11 |
| ILMN_2397795 | FLJ30046  | NM_144595.2    | 2.51 | 1.33 | 13.29 | 11.96 | 4.34E-13 | 2.38E-11 |
| ILMN_1766165 | SNCA      | NM_000345.2    | 3.68 | 1.88 | 10.45 | 8.57  | 4.38E-13 | 2.39E-11 |
| ILMN_1759380 | UNQ5810   | NM_207384.1    | 4.53 | 2.18 | 9.86  | 7.68  | 4.42E-13 | 2.41E-11 |
| ILMN_2189306 | ROBO2     | NM_002942.2    | 4.08 | 2.03 | 11.25 | 9.22  | 4.46E-13 | 2.43E-11 |
| ILMN_1762139 | CRB1      | NM_201253.1    | 5.35 | 2.42 | 10.48 | 8.06  | 4.62E-13 | 2.5E-11  |
| ILMN_1718182 | THRA      | NM_003250.4    | 3.23 | 1.69 | 11.33 | 9.64  | 4.7E-13  | 2.53E-11 |
| ILMN_1719641 | SMOC2     | NM_022138.1    | 7.16 | 2.84 | 10.13 | 7.28  | 4.92E-13 | 2.64E-11 |
| ILMN_2387865 | KCNIP4    | NM_001035004.1 | 3.23 | 1.69 | 13.13 | 11.45 | 4.97E-13 | 2.65E-11 |
| ILMN_1791647 | ASIP      | NM_001672.2    | 5.10 | 2.35 | 9.72  | 7.36  | 5.04E-13 | 2.69E-11 |
| ILMN_2361163 | SSBP3     | NM_018070.3    | 3.14 | 1.65 | 10.44 | 8.79  | 5.07E-13 | 2.7E-11  |
| ILMN_1677603 | C1S       | NM_201442.1    | 3.71 | 1.89 | 9.57  | 7.68  | 5.22E-13 | 2.76E-11 |
| ILMN_1723227 | FGF3      | NM_005247.2    | 4.41 | 2.14 | 9.83  | 7.69  | 5.28E-13 | 2.78E-11 |
| ILMN_1742382 | RIMS3     | NM_014747.2    | 3.25 | 1.7  | 11.57 | 9.88  | 5.41E-13 | 2.84E-11 |
| ILMN_1723684 | DARC      | NM_002036.2    | 4.56 | 2.19 | 10.61 | 8.41  | 5.5E-13  | 2.88E-11 |
| ILMN_1671337 | SLC2A5    | NM_003039.1    | 5.90 | 2.56 | 9.79  | 7.24  | 5.51E-13 | 2.88E-11 |
| ILMN_1660808 | WFDC1     | NM_021197.2    | 4.14 | 2.05 | 9.49  | 7.44  | 5.54E-13 | 2.88E-11 |
| ILMN_1671365 | PRODH     | NM_016335.2    | 4.72 | 2.24 | 9.74  | 7.5   | 5.76E-13 | 2.99E-11 |
| ILMN_1751569 | C1ORF173  | NM_001002912.2 | 5.35 | 2.42 | 10.07 | 7.65  | 5.83E-13 | 3.01E-11 |
| ILMN_2363634 | ADHFE1    | NM_001077593.1 | 2.45 | 1.29 | 9.61  | 8.32  | 5.87E-13 | 3.02E-11 |

Supplementary Table 2

|              |          |                |      |      |       |       |          |          |
|--------------|----------|----------------|------|------|-------|-------|----------|----------|
| ILMN_1657373 | LEPREL1  | NM_018192.2    | 2.28 | 1.19 | 12.3  | 11.11 | 5.94E-13 | 3.05E-11 |
| ILMN_1723678 | PRPH     | NM_006262.3    | 4.00 | 2    | 12.62 | 10.62 | 6.16E-13 | 3.15E-11 |
| ILMN_1814686 | BCMO1    | NM_017429.2    | 4.92 | 2.3  | 9.88  | 7.59  | 6.16E-13 | 3.15E-11 |
| ILMN_1660114 | MMRN1    | NM_007351.2    | 5.39 | 2.43 | 9.76  | 7.33  | 6.28E-13 | 3.2E-11  |
| ILMN_1671843 | PSRC1    | NM_001005290.2 | 2.33 | 1.22 | 14.79 | 13.57 | 6.37E-13 | 3.23E-11 |
| ILMN_1772876 | ZNF395   | NM_018660.2    | 2.17 | 1.12 | 12.25 | 11.13 | 6.58E-13 | 3.34E-11 |
| ILMN_1773082 | CYP21A2  | NM_000500.5    | 3.51 | 1.81 | 9.79  | 7.99  | 6.67E-13 | 3.38E-11 |
| ILMN_1733831 | PGBD5    | NM_024554.2    | 3.84 | 1.94 | 10.78 | 8.84  | 6.69E-13 | 3.38E-11 |
| ILMN_1751445 | PPY      | NM_002722.2    | 5.74 | 2.52 | 9.99  | 7.46  | 6.72E-13 | 3.39E-11 |
| ILMN_1794074 | MXI1     | NM_001008541.1 | 2.85 | 1.51 | 10.26 | 8.76  | 6.88E-13 | 3.46E-11 |
| ILMN_2401987 | DLEC1    | NM_007337.2    | 3.86 | 1.95 | 9.09  | 7.14  | 7.83E-13 | 3.9E-11  |
| ILMN_2219767 | MYCN     | NM_005378.4    | 2.75 | 1.46 | 11.45 | 9.98  | 8.01E-13 | 3.98E-11 |
| ILMN_1751656 | KLF11    | XM_938887.1    | 2.58 | 1.37 | 12.01 | 10.64 | 8.34E-13 | 4.13E-11 |
| ILMN_1788786 | GLRA2    | NM_002063.2    | 3.56 | 1.83 | 10.85 | 9.02  | 8.51E-13 | 4.21E-11 |
| ILMN_1726624 | YPEL4    | NM_145008.1    | 5.31 | 2.41 | 9.93  | 7.52  | 8.85E-13 | 4.32E-11 |
| ILMN_1789112 | FLJ90805 | NM_173633.1    | 3.51 | 1.81 | 11.6  | 9.78  | 8.86E-13 | 4.32E-11 |
| ILMN_1676289 | NCAM1    | NM_181351.1    | 2.62 | 1.39 | 12.76 | 11.37 | 8.9E-13  | 4.33E-11 |
| ILMN_1684959 | ASTN     | NM_004319.1    | 3.01 | 1.59 | 12.02 | 10.42 | 9.12E-13 | 4.42E-11 |
| ILMN_1691410 | BAMBI    | NM_012342.2    | 3.76 | 1.91 | 11.98 | 10.07 | 9.21E-13 | 4.46E-11 |
| ILMN_2363065 | RTN3     | NM_201430.1    | 2.30 | 1.2  | 14.5  | 13.3  | 9.48E-13 | 4.57E-11 |
| ILMN_1743445 | FAM107A  | NM_007177.1    | 2.62 | 1.39 | 14.3  | 12.9  | 9.77E-13 | 4.7E-11  |
| ILMN_1730945 | C19ORF4  | NM_012109.1    | 3.12 | 1.64 | 13.3  | 11.65 | 1.02E-12 | 4.88E-11 |
| ILMN_1682139 | RAI14    | NM_015577.1    | 2.50 | 1.32 | 13.27 | 11.96 | 1.03E-12 | 4.9E-11  |
| ILMN_1781010 | ARHGEF3  | NM_019555.1    | 2.25 | 1.17 | 13.6  | 12.43 | 1.06E-12 | 5.03E-11 |
| ILMN_1738816 | FOXO1A   | NM_002015.2    | 2.77 | 1.47 | 11.37 | 9.89  | 1.08E-12 | 5.08E-11 |
| ILMN_1773389 | PLTP     | NM_006227.2    | 2.51 | 1.33 | 14.28 | 12.95 | 1.11E-12 | 5.18E-11 |
| ILMN_1706859 | LOC91689 | NM_033318.3    | 3.14 | 1.65 | 11.69 | 10.05 | 1.12E-12 | 5.25E-11 |
| ILMN_1814165 | SSBP3    | NM_145716.2    | 3.48 | 1.8  | 10.48 | 8.68  | 1.14E-12 | 5.33E-11 |
| ILMN_2078995 | FAM130A2 | NM_024969.2    | 3.81 | 1.93 | 10.41 | 8.48  | 1.15E-12 | 5.35E-11 |
| ILMN_2065690 | GRAMD3   | NM_023927.1    | 3.27 | 1.71 | 11.03 | 9.32  | 1.17E-12 | 5.41E-11 |
| ILMN_2361737 | TRIM36   | NM_001017397.1 | 3.84 | 1.94 | 11.74 | 9.8   | 1.18E-12 | 5.45E-11 |
| ILMN_1654541 | ATP6V1G2 | NM_130463.2    | 2.51 | 1.33 | 13.34 | 12.02 | 1.26E-12 | 5.76E-11 |
| ILMN_1674580 | TRIM36   | NM_001017397.1 | 3.61 | 1.85 | 10.88 | 9.03  | 1.37E-12 | 6.19E-11 |
| ILMN_1769779 | PTP4A3   | NM_007079.2    | 3.16 | 1.66 | 11.66 | 10    | 1.37E-12 | 6.19E-11 |
| ILMN_1767662 | LASS6    | NM_203463.1    | 3.07 | 1.62 | 14.83 | 13.21 | 1.41E-12 | 6.35E-11 |
| ILMN_1763834 | APLP1    | NM_005166.3    | 2.50 | 1.32 | 12.43 | 11.1  | 1.42E-12 | 6.35E-11 |
| ILMN_1744897 | KCNN3    | NM_170782.1    | 4.63 | 2.21 | 10.79 | 8.58  | 1.47E-12 | 6.55E-11 |
| ILMN_1692698 | FLJ12505 | NM_024749.2    | 3.58 | 1.84 | 10.33 | 8.49  | 1.51E-12 | 6.68E-11 |
| ILMN_1696537 | DDIT4L   | NM_145244.2    | 4.23 | 2.08 | 9.74  | 7.66  | 1.52E-12 | 6.7E-11  |
| ILMN_1745471 | ISGF3G   | NM_006084.3    | 2.22 | 1.15 | 13.53 | 12.38 | 1.53E-12 | 6.73E-11 |
| ILMN_1695706 | H3F3B    | NM_005324.3    | 2.28 | 1.19 | 13.98 | 12.79 | 1.57E-12 | 6.91E-11 |
| ILMN_1808956 | C15ORF27 | NM_152335.1    | 3.86 | 1.95 | 9.31  | 7.36  | 1.62E-12 | 7.1E-11  |
| ILMN_1672094 | DLX1     | NM_178120.3    | 2.22 | 1.15 | 14.81 | 13.67 | 1.67E-12 | 7.31E-11 |

Supplementary Table 2

|              |            |                |      |      |       |       |          |          |
|--------------|------------|----------------|------|------|-------|-------|----------|----------|
| ILMN_1672382 | SLC38A3    | NM_006841.3    | 3.66 | 1.87 | 9.63  | 7.75  | 1.69E-12 | 7.37E-11 |
| ILMN_1680652 | SELENBP1   | NM_003944.2    | 2.75 | 1.46 | 10.68 | 9.22  | 1.8E-12  | 7.81E-11 |
| ILMN_2113102 | PHKG1      | NM_006213.3    | 3.07 | 1.62 | 9.62  | 8     | 1.8E-12  | 7.81E-11 |
| ILMN_1788538 | NCALD      | NM_032041.1    | 2.62 | 1.39 | 12.69 | 11.3  | 1.82E-12 | 7.87E-11 |
| ILMN_2218935 | GPR37      | NM_005302.2    | 2.50 | 1.32 | 10.93 | 9.61  | 1.87E-12 | 8.05E-11 |
| ILMN_1656287 | SPOCK2     | NM_014767.1    | 2.39 | 1.26 | 13.56 | 12.3  | 1.88E-12 | 8.1E-11  |
| ILMN_1783231 | PLEKHB1    | NM_021200.1    | 2.77 | 1.47 | 12.36 | 10.89 | 2E-12    | 8.58E-11 |
| ILMN_1784630 | KBTBD11    | NM_014867.1    | 2.95 | 1.56 | 12.02 | 10.45 | 2.03E-12 | 8.64E-11 |
| ILMN_1761322 | FHOD3      | NM_025135.2    | 3.16 | 1.66 | 11.95 | 10.28 | 2.07E-12 | 8.82E-11 |
| ILMN_1795190 | CLDN2      | NM_020384.2    | 4.00 | 2    | 9.59  | 7.59  | 2.14E-12 | 9.04E-11 |
| ILMN_1754078 | CABP7      | NM_182527.1    | 4.26 | 2.09 | 10.43 | 8.34  | 2.19E-12 | 9.21E-11 |
| ILMN_2311278 | ADD3       | NM_001121.2    | 2.68 | 1.42 | 13.03 | 11.6  | 2.23E-12 | 9.33E-11 |
| ILMN_2283597 | FLJ20152   | NM_001034850.1 | 2.62 | 1.39 | 12.41 | 11.02 | 2.24E-12 | 9.37E-11 |
| ILMN_1692394 | KIAA1024   | NM_015206.1    | 4.92 | 2.3  | 10.81 | 8.51  | 2.27E-12 | 9.5E-11  |
| ILMN_1723912 | IFI44L     | NM_006820.1    | 2.79 | 1.48 | 10.8  | 9.32  | 2.37E-12 | 9.82E-11 |
| ILMN_1759598 | DLX5       | NM_005221.4    | 2.38 | 1.25 | 14.36 | 13.11 | 2.47E-12 | 1.02E-10 |
| ILMN_2228463 | DDC        | NM_000790.2    | 3.58 | 1.84 | 10.25 | 8.41  | 2.53E-12 | 1.04E-10 |
| ILMN_2181892 | BEX2       | NM_032621.2    | 2.85 | 1.51 | 13.34 | 11.83 | 2.66E-12 | 1.09E-10 |
| ILMN_1792256 | TBX2       | NM_005994.3    | 4.32 | 2.11 | 11.2  | 9.1   | 2.66E-12 | 1.09E-10 |
| ILMN_2347798 | IFI6       | NM_022872.2    | 3.41 | 1.77 | 12.19 | 10.42 | 2.7E-12  | 1.1E-10  |
| ILMN_2197693 | CTNNA2     | NM_004389.2    | 3.78 | 1.92 | 9.51  | 7.59  | 2.78E-12 | 1.13E-10 |
| ILMN_1702175 | ST7        | NM_018412.3    | 2.60 | 1.38 | 11.3  | 9.91  | 2.86E-12 | 1.15E-10 |
| ILMN_1675612 | BLCAP      | NM_006698.2    | 2.36 | 1.24 | 12.45 | 11.21 | 2.89E-12 | 1.16E-10 |
| ILMN_1752476 | C6ORF134   | NM_024909.1    | 2.27 | 1.18 | 12.72 | 11.53 | 2.99E-12 | 1.2E-10  |
| ILMN_1738003 | POU3F4     | NM_000307.1    | 3.12 | 1.64 | 10.2  | 8.56  | 3.09E-12 | 1.24E-10 |
| ILMN_1690035 | FLYWCH1    | NM_032296.2    | 4.23 | 2.08 | 10.47 | 8.4   | 3.11E-12 | 1.25E-10 |
| ILMN_1669033 | NCOA1      | NM_147223.2    | 2.16 | 1.11 | 12.74 | 11.63 | 3.15E-12 | 1.26E-10 |
| ILMN_1651838 | RND1       | NM_014470.2    | 3.12 | 1.64 | 9.79  | 8.15  | 3.15E-12 | 1.26E-10 |
| ILMN_1695271 | RPP25      | NM_017793.1    | 2.93 | 1.55 | 10.31 | 8.76  | 3.25E-12 | 1.29E-10 |
| ILMN_1707763 | ST7        | NM_018412.3    | 2.43 | 1.28 | 11.67 | 10.38 | 3.28E-12 | 1.3E-10  |
| ILMN_1651826 | BASP1      | NM_006317.3    | 2.22 | 1.15 | 14.71 | 13.57 | 3.31E-12 | 1.31E-10 |
| ILMN_1713561 | C20ORF103  | NM_012261.2    | 3.46 | 1.79 | 10.77 | 8.98  | 3.34E-12 | 1.32E-10 |
| ILMN_1695829 | TTYH2      | NM_052869.1    | 3.56 | 1.83 | 11.04 | 9.21  | 3.38E-12 | 1.33E-10 |
| ILMN_1660732 | PPP2R2B    | NM_181676.1    | 2.87 | 1.52 | 14.55 | 13.03 | 3.5E-12  | 1.38E-10 |
| ILMN_1719883 | CYP4F11    | NM_021187.2    | 2.66 | 1.41 | 9.88  | 8.47  | 3.56E-12 | 1.39E-10 |
| ILMN_1748831 | PPP1R13B   | NM_015316.1    | 2.81 | 1.49 | 10.86 | 9.37  | 3.58E-12 | 1.4E-10  |
| ILMN_1778844 | FAM5B      | NM_021165.1    | 2.81 | 1.49 | 10.26 | 8.76  | 3.59E-12 | 1.4E-10  |
| ILMN_1716957 | C1QL1      | NM_006688.3    | 3.18 | 1.67 | 11.8  | 10.14 | 3.72E-12 | 1.45E-10 |
| ILMN_2390544 | DKFZP564J1 | NM_015398.1    | 2.62 | 1.39 | 10.42 | 9.03  | 3.74E-12 | 1.45E-10 |
| ILMN_1723123 | FGFR3      | NM_000142.2    | 2.45 | 1.29 | 12.62 | 11.32 | 3.8E-12  | 1.47E-10 |
| ILMN_1691846 | G0S2       | NM_015714.2    | 3.32 | 1.73 | 11.18 | 9.45  | 3.82E-12 | 1.48E-10 |
| ILMN_2412336 | AKR1C2     | NM_001354.4    | 3.41 | 1.77 | 9.09  | 7.32  | 3.84E-12 | 1.48E-10 |
| ILMN_1654563 | EFNB1      | NM_004429.3    | 2.89 | 1.53 | 11.57 | 10.04 | 3.9E-12  | 1.5E-10  |

Supplementary Table 2

|              |          |                |      |      |       |       |          |          |
|--------------|----------|----------------|------|------|-------|-------|----------|----------|
| ILMN_1803855 | FAIM2    | NM_012306.2    | 2.87 | 1.52 | 10.21 | 8.69  | 3.99E-12 | 1.53E-10 |
| ILMN_2227266 | TMEM35   | NM_021637.1    | 2.71 | 1.44 | 11.85 | 10.41 | 4.05E-12 | 1.55E-10 |
| ILMN_1791147 | YPEL3    | NM_031477.3    | 2.55 | 1.35 | 11.47 | 10.12 | 4.09E-12 | 1.56E-10 |
| ILMN_1727183 | ZNF440L  | NM_001012753.1 | 3.14 | 1.65 | 10.06 | 8.4   | 4.1E-12  | 1.56E-10 |
| ILMN_1791097 | RSBN1    | NM_018364.3    | 2.30 | 1.2  | 12.5  | 11.3  | 4.11E-12 | 1.57E-10 |
| ILMN_1729234 | TPP1     | NM_000391.2    | 2.64 | 1.4  | 14.02 | 12.62 | 4.18E-12 | 1.59E-10 |
| ILMN_1711748 | PLTP     | NM_006227.2    | 2.55 | 1.35 | 12.6  | 11.25 | 4.2E-12  | 1.59E-10 |
| ILMN_2410938 | SMOC1    | NM_001034852.1 | 2.50 | 1.32 | 11.86 | 10.54 | 4.28E-12 | 1.62E-10 |
| ILMN_1758315 | SLC9A9   | NM_173653.1    | 5.10 | 2.35 | 9.94  | 7.59  | 4.5E-12  | 1.69E-10 |
| ILMN_1803256 | STOX2    | NM_020225.1    | 2.87 | 1.52 | 12.78 | 11.26 | 4.51E-12 | 1.69E-10 |
| ILMN_1719998 | C9ORF45  | NM_030814.4    | 4.00 | 2    | 10.56 | 8.57  | 4.76E-12 | 1.78E-10 |
| ILMN_1719755 | FBN3     | NM_032447.3    | 4.47 | 2.16 | 10.46 | 8.3   | 4.81E-12 | 1.79E-10 |
| ILMN_1691848 | LIX1     | NM_153234.3    | 4.41 | 2.14 | 10.1  | 7.96  | 4.86E-12 | 1.8E-10  |
| ILMN_1678842 | THBS2    | NM_003247.2    | 4.32 | 2.11 | 11.14 | 9.04  | 4.93E-12 | 1.83E-10 |
| ILMN_1785061 | EPHB2    | NM_017449.2    | 4.06 | 2.02 | 11.49 | 9.47  | 5.04E-12 | 1.86E-10 |
| ILMN_1682123 | TTC9B    | NM_152479.3    | 4.69 | 2.23 | 10.4  | 8.18  | 5.1E-12  | 1.88E-10 |
| ILMN_1811178 | ZNF291   | NM_020843.1    | 2.39 | 1.26 | 10.97 | 9.71  | 5.55E-12 | 2.03E-10 |
| ILMN_2387471 | FLJ22184 | NM_001080403.1 | 2.04 | 1.03 | 12.92 | 11.89 | 5.58E-12 | 2.03E-10 |
| ILMN_1747683 | AQP4     | NM_004028.3    | 3.25 | 1.7  | 14.25 | 12.55 | 5.84E-12 | 2.11E-10 |
| ILMN_1731397 | STMN4    | NM_030795.2    | 2.38 | 1.25 | 13.52 | 12.27 | 5.96E-12 | 2.14E-10 |
| ILMN_2376194 | CAMK2B   | NM_172080.1    | 3.07 | 1.62 | 11.82 | 10.2  | 5.98E-12 | 2.15E-10 |
| ILMN_1673518 | BRWD1    | NM_001007246.1 | 2.16 | 1.11 | 12.33 | 11.22 | 5.99E-12 | 2.15E-10 |
| ILMN_1735996 | NOX4     | NM_016931.2    | 2.77 | 1.47 | 10.64 | 9.17  | 6.12E-12 | 2.19E-10 |
| ILMN_2359742 | CTSB     | NM_001908.3    | 2.39 | 1.26 | 14.21 | 12.95 | 6.13E-12 | 2.19E-10 |
| ILMN_1657554 | TSPYL2   | NM_022117.1    | 3.16 | 1.66 | 11.14 | 9.49  | 6.35E-12 | 2.26E-10 |
| ILMN_1713422 | ST18     | NM_014682.1    | 6.15 | 2.62 | 9.9   | 7.28  | 6.49E-12 | 2.3E-10  |
| ILMN_1771627 | RAI17    | NM_020338.2    | 2.11 | 1.08 | 14.33 | 13.25 | 6.64E-12 | 2.35E-10 |
| ILMN_1779685 | ACCN1    | NM_183377.1    | 4.32 | 2.11 | 9.26  | 7.16  | 7.03E-12 | 2.47E-10 |
| ILMN_1662256 | PARP6    | NM_020213.1    | 3.36 | 1.75 | 10.65 | 8.91  | 7.1E-12  | 2.49E-10 |
| ILMN_2148193 | MPPED2   | NM_001584.1    | 4.72 | 2.24 | 11.72 | 9.48  | 7.16E-12 | 2.51E-10 |
| ILMN_1727975 | SNTG1    | NM_018967.2    | 2.22 | 1.15 | 11.88 | 10.73 | 7.17E-12 | 2.51E-10 |
| ILMN_1702858 | ADHFE1   | NM_144650.1    | 2.87 | 1.52 | 10.79 | 9.26  | 7.4E-12  | 2.58E-10 |
| ILMN_2256907 | MAPK10   | NM_138980.1    | 3.16 | 1.66 | 11.26 | 9.6   | 7.46E-12 | 2.6E-10  |
| ILMN_1655563 | KIAA0427 | NM_014772.1    | 2.62 | 1.39 | 11.3  | 9.91  | 7.48E-12 | 2.6E-10  |
| ILMN_1689456 | ZBTB20   | NM_015642.2    | 4.26 | 2.09 | 13.34 | 11.24 | 7.78E-12 | 2.69E-10 |
| ILMN_1690703 | C21ORF34 | NM_001005732.1 | 2.38 | 1.25 | 11.83 | 10.58 | 7.94E-12 | 2.73E-10 |
| ILMN_1759513 | RND3     | NM_005168.3    | 2.68 | 1.42 | 14.01 | 12.59 | 8.05E-12 | 2.76E-10 |
| ILMN_2401641 | ALDH3A2  | NM_001031806.1 | 2.13 | 1.09 | 12.89 | 11.8  | 8.17E-12 | 2.79E-10 |
| ILMN_1750181 | TESC     | NM_017899.1    | 2.45 | 1.29 | 11.59 | 10.31 | 8.52E-12 | 2.89E-10 |
| ILMN_1787539 | ZNF177   | NM_003451.1    | 2.25 | 1.17 | 11.09 | 9.92  | 8.52E-12 | 2.89E-10 |
| ILMN_2294978 | RNASE4   | NM_194430.1    | 2.93 | 1.55 | 9.82  | 8.27  | 8.63E-12 | 2.92E-10 |
| ILMN_1668592 | STON1    | NM_006873.2    | 3.23 | 1.69 | 10.34 | 8.64  | 8.7E-12  | 2.94E-10 |
| ILMN_1667058 | CLU      | NM_001831.2    | 2.35 | 1.23 | 8.31  | 7.08  | 8.72E-12 | 2.94E-10 |



Supplementary Table 2

|              |           |                |      |      |       |       |          |          |
|--------------|-----------|----------------|------|------|-------|-------|----------|----------|
| ILMN_1704353 | IGSF3     | NM_001542.2    | 2.30 | 1.2  | 12.14 | 10.94 | 9.06E-12 | 3.05E-10 |
| ILMN_2107933 | ZNF285A   | NM_152354.2    | 2.17 | 1.12 | 11.06 | 9.95  | 9.23E-12 | 3.09E-10 |
| ILMN_1787750 | CD200     | NM_001004196.1 | 2.53 | 1.34 | 10.16 | 8.82  | 9.25E-12 | 3.09E-10 |
| ILMN_1737089 | CAPN5     | NM_004055.3    | 2.69 | 1.43 | 14.85 | 13.42 | 9.26E-12 | 3.09E-10 |
| ILMN_2319424 | GYG2      | NM_003918.2    | 2.36 | 1.24 | 13.18 | 11.94 | 9.27E-12 | 3.09E-10 |
| ILMN_1661683 | THRA      | NM_199334.2    | 4.41 | 2.14 | 11.86 | 9.72  | 9.36E-12 | 3.11E-10 |
| ILMN_1767446 | RNF150    | NM_020724.1    | 2.64 | 1.4  | 11.18 | 9.78  | 9.91E-12 | 3.27E-10 |
| ILMN_1752793 | SAP18     | NM_005870.3    | 2.22 | 1.15 | 12.4  | 11.25 | 1.01E-11 | 3.33E-10 |
| ILMN_2082209 | C20ORF100 | NM_032883.1    | 2.30 | 1.2  | 12.98 | 11.78 | 1.03E-11 | 3.38E-10 |
| ILMN_1730931 | RUFY3     | NM_014961.2    | 2.27 | 1.18 | 13.99 | 12.81 | 1.05E-11 | 3.45E-10 |
| ILMN_1802167 | ALDH1L1   | NM_012190.2    | 5.21 | 2.38 | 10.01 | 7.64  | 1.07E-11 | 3.49E-10 |
| ILMN_2401143 | ELAVL3    | NM_001420.3    | 3.29 | 1.72 | 10.81 | 9.09  | 1.07E-11 | 3.49E-10 |
| ILMN_1728301 | GAD2      | NM_000818.1    | 2.89 | 1.53 | 10.36 | 8.83  | 1.09E-11 | 3.55E-10 |
| ILMN_1762531 | FGF9      | NM_002010.1    | 3.48 | 1.8  | 9.71  | 7.91  | 1.09E-11 | 3.55E-10 |
| ILMN_1765258 | HLA-E     | NM_005516.4    | 2.50 | 1.32 | 11.35 | 10.03 | 1.1E-11  | 3.57E-10 |
| ILMN_1733811 | JUP       | NM_021991.1    | 2.81 | 1.49 | 11.65 | 10.16 | 1.1E-11  | 3.57E-10 |
| ILMN_1680132 | IGSF4     | NM_014333.2    | 2.33 | 1.22 | 14.56 | 13.34 | 1.14E-11 | 3.7E-10  |
| ILMN_1713491 | VAMP2     | NM_014232.1    | 2.41 | 1.27 | 12.44 | 11.17 | 1.17E-11 | 3.78E-10 |
| ILMN_2092850 | HPSE      | NM_006665.3    | 3.53 | 1.82 | 9.39  | 7.57  | 1.17E-11 | 3.78E-10 |
| ILMN_1681703 | FOXO3A    | NM_001455.2    | 2.58 | 1.37 | 14.17 | 12.8  | 1.19E-11 | 3.82E-10 |
| ILMN_1679232 | KIDINS220 | NM_020738.1    | 2.33 | 1.22 | 13.61 | 12.39 | 1.27E-11 | 4.07E-10 |
| ILMN_1809859 | PCGF2     | NM_007144.2    | 2.13 | 1.09 | 12.76 | 11.67 | 1.29E-11 | 4.13E-10 |
| ILMN_1685044 | MTUS1     | NM_001001931.1 | 2.60 | 1.38 | 9.34  | 7.96  | 1.33E-11 | 4.24E-10 |
| ILMN_1729987 | SRC       | NM_005417.3    | 2.46 | 1.3  | 11.99 | 10.69 | 1.38E-11 | 4.35E-10 |
| ILMN_2121816 | GPR137B   | NM_003272.1    | 2.03 | 1.02 | 12.92 | 11.9  | 1.39E-11 | 4.38E-10 |
| ILMN_1720113 | PTPRO     | NM_030670.1    | 4.66 | 2.22 | 10.5  | 8.28  | 1.39E-11 | 4.38E-10 |
| ILMN_1814194 | TCF4      | NM_003199.1    | 2.46 | 1.3  | 13.19 | 11.88 | 1.41E-11 | 4.45E-10 |
| ILMN_1673152 | NRXN1     | NM_004801.2    | 4.35 | 2.12 | 9.84  | 7.72  | 1.43E-11 | 4.48E-10 |
| ILMN_2328094 | DACT1     | NM_016651.5    | 4.89 | 2.29 | 10.45 | 8.15  | 1.45E-11 | 4.55E-10 |
| ILMN_1736184 | GSTM3     | NM_000849.3    | 2.77 | 1.47 | 11.02 | 9.54  | 1.46E-11 | 4.56E-10 |
| ILMN_1739428 | IFIT2     | NM_001547.3    | 3.27 | 1.71 | 11.71 | 10    | 1.46E-11 | 4.56E-10 |
| ILMN_2412822 | SCN3B     | NM_018400.2    | 2.58 | 1.37 | 9.14  | 7.77  | 1.47E-11 | 4.59E-10 |
| ILMN_2388445 | DLX1      | NM_001038493.1 | 2.58 | 1.37 | 13.48 | 12.11 | 1.52E-11 | 4.71E-10 |
| ILMN_2390853 | CTSH      | NM_004390.2    | 3.10 | 1.63 | 11.76 | 10.13 | 1.53E-11 | 4.73E-10 |
| ILMN_2343278 | PPAP2A    | NM_176895.1    | 2.27 | 1.18 | 11.92 | 10.74 | 1.56E-11 | 4.83E-10 |
| ILMN_2360202 | PPP2R2B   | NM_181676.1    | 2.95 | 1.56 | 12.12 | 10.56 | 1.57E-11 | 4.86E-10 |
| ILMN_1718629 | NRIP1     | NM_003489.2    | 2.35 | 1.23 | 13.11 | 11.88 | 1.59E-11 | 4.89E-10 |
| ILMN_2334210 | ITGB4     | NM_001005619.1 | 6.54 | 2.71 | 10.72 | 8.02  | 1.59E-11 | 4.9E-10  |
| ILMN_1791447 | CXCL12    | NM_199168.2    | 3.20 | 1.68 | 11.84 | 10.16 | 1.6E-11  | 4.94E-10 |
| ILMN_1765076 | DIP13B    | NM_018171.2    | 1.97 | 0.98 | 12.85 | 11.87 | 1.62E-11 | 4.98E-10 |
| ILMN_2407703 | SYN1      | NM_006950.2    | 4.50 | 2.17 | 11.01 | 8.84  | 1.63E-11 | 4.98E-10 |
| ILMN_2398077 | MEIS2     | NM_170677.2    | 2.91 | 1.54 | 10.82 | 9.28  | 1.65E-11 | 5.05E-10 |
| ILMN_1720850 | BAZ2B     | NM_013450.1    | 2.33 | 1.22 | 12.08 | 10.86 | 1.68E-11 | 5.13E-10 |

Supplementary Table 2

|              |           |                |      |      |       |       |          |          |
|--------------|-----------|----------------|------|------|-------|-------|----------|----------|
| ILMN_1687445 | MGC16372  | NM_145038.1    | 3.63 | 1.86 | 9.11  | 7.25  | 1.71E-11 | 5.2E-10  |
| ILMN_1726597 | C6ORF32   | NM_015864.2    | 2.81 | 1.49 | 11.84 | 10.35 | 1.72E-11 | 5.23E-10 |
| ILMN_1712298 | ANKRD46   | NM_198401.2    | 2.11 | 1.08 | 12.08 | 11.01 | 1.75E-11 | 5.3E-10  |
| ILMN_1721636 | TSC22D4   | NM_030935.3    | 2.48 | 1.31 | 11.47 | 10.16 | 1.77E-11 | 5.37E-10 |
| ILMN_1739161 | PPAP2A    | NM_003711.2    | 2.33 | 1.22 | 10.85 | 9.63  | 1.81E-11 | 5.47E-10 |
| ILMN_1665455 | DCUN1D3   | NM_173475.1    | 2.10 | 1.07 | 11.95 | 10.88 | 1.84E-11 | 5.58E-10 |
| ILMN_1666924 | PINK1     | NM_032409.1    | 2.38 | 1.25 | 12.37 | 11.13 | 1.86E-11 | 5.63E-10 |
| ILMN_1744937 | PTPRM     | NM_002845.2    | 2.81 | 1.49 | 11.12 | 9.63  | 1.88E-11 | 5.68E-10 |
| ILMN_1674151 | GCOM1     | NM_001018096.1 | 4.66 | 2.22 | 9.75  | 7.52  | 1.93E-11 | 5.83E-10 |
| ILMN_1794333 | POU2F1    | NM_002697.2    | 2.39 | 1.26 | 10.27 | 9.01  | 2E-11    | 5.99E-10 |
| ILMN_1782761 | ARHGAP20  | NM_020809.2    | 3.53 | 1.82 | 9.3   | 7.48  | 2E-11    | 6E-10    |
| ILMN_1689002 | DTX1      | NM_004416.2    | 2.99 | 1.58 | 9.96  | 8.38  | 2.11E-11 | 6.3E-10  |
| ILMN_1683065 | MGC52110  | NM_001008215.1 | 2.03 | 1.02 | 13.24 | 12.22 | 2.12E-11 | 6.33E-10 |
| ILMN_1719286 | PPGB      | NM_000308.1    | 2.28 | 1.19 | 12.78 | 11.59 | 2.18E-11 | 6.47E-10 |
| ILMN_1712583 | METRNL    | NM_024042.2    | 2.51 | 1.33 | 14.02 | 12.7  | 2.18E-11 | 6.47E-10 |
| ILMN_1798081 | PTPRF     | NM_130440.1    | 2.00 | 1    | 11.85 | 10.85 | 2.26E-11 | 6.64E-10 |
| ILMN_2393544 | PRMT2     | NM_001535.2    | 2.04 | 1.03 | 13.53 | 12.5  | 2.29E-11 | 6.72E-10 |
| ILMN_1712786 | KIAA0828  | NM_015328.1    | 3.16 | 1.66 | 11.72 | 10.06 | 2.31E-11 | 6.77E-10 |
| ILMN_1793578 | ZFP37     | NM_003408.1    | 2.17 | 1.12 | 10.83 | 9.71  | 2.33E-11 | 6.82E-10 |
| ILMN_1752728 | FUCA1     | NM_000147.2    | 2.04 | 1.03 | 11.85 | 10.82 | 2.36E-11 | 6.9E-10  |
| ILMN_2171588 | SLC6A1    | NM_003042.2    | 5.66 | 2.5  | 11.6  | 9.1   | 2.39E-11 | 6.96E-10 |
| ILMN_2205050 | PRKX      | NM_005044.1    | 3.07 | 1.62 | 10.89 | 9.27  | 2.43E-11 | 7.05E-10 |
| ILMN_1654653 | KNS2      | NM_005552.3    | 2.00 | 1    | 13.82 | 12.82 | 2.48E-11 | 7.17E-10 |
| ILMN_2127897 | DDX25     | NM_013264.2    | 2.77 | 1.47 | 10.19 | 8.72  | 2.54E-11 | 7.33E-10 |
| ILMN_2395375 | GABBR1    | NM_021905.1    | 2.46 | 1.3  | 11.68 | 10.38 | 2.55E-11 | 7.34E-10 |
| ILMN_1811330 | FLJ20152  | NM_019000.2    | 2.71 | 1.44 | 11.6  | 10.16 | 2.59E-11 | 7.43E-10 |
| ILMN_2408683 | PPAP2B    | NM_177414.1    | 2.01 | 1.01 | 13.39 | 12.38 | 2.71E-11 | 7.75E-10 |
| ILMN_1709847 | KCNJ13    | NM_002242.2    | 2.68 | 1.42 | 9.81  | 8.4   | 2.71E-11 | 7.75E-10 |
| ILMN_1701483 | SYP       | NM_003179.2    | 2.41 | 1.27 | 10.31 | 9.04  | 2.75E-11 | 7.85E-10 |
| ILMN_1757262 | ZBTB5     | NM_014872.1    | 1.96 | 0.97 | 11.17 | 10.19 | 2.76E-11 | 7.87E-10 |
| ILMN_1688629 | ZNF274    | NM_016324.2    | 1.91 | 0.93 | 11.98 | 11.05 | 2.77E-11 | 7.89E-10 |
| ILMN_1748124 | TSC22D3   | NM_004089.3    | 2.31 | 1.21 | 10.84 | 9.63  | 2.81E-11 | 7.94E-10 |
| ILMN_1779070 | APOL4     | NM_030643.3    | 2.99 | 1.58 | 9.59  | 8     | 2.84E-11 | 8.01E-10 |
| ILMN_1695946 | LOC388610 | NM_001013642.1 | 2.43 | 1.28 | 12.53 | 11.25 | 2.86E-11 | 8.07E-10 |
| ILMN_1694027 | SESN3     | NM_144665.2    | 3.01 | 1.59 | 10.47 | 8.88  | 2.97E-11 | 8.32E-10 |
| ILMN_1791679 | DNER      | NM_139072.2    | 6.23 | 2.64 | 12.51 | 9.88  | 3E-11    | 8.37E-10 |
| ILMN_1806473 | NGFRAP1L1 | NM_001012978.1 | 2.64 | 1.4  | 8.97  | 7.57  | 3.04E-11 | 8.46E-10 |
| ILMN_1652072 | MGC42105  | NM_153361.2    | 3.34 | 1.74 | 11.06 | 9.33  | 3.29E-11 | 9.08E-10 |
| ILMN_1775405 | ARL4      | NM_005738.2    | 3.12 | 1.64 | 11.9  | 10.26 | 3.34E-11 | 9.2E-10  |
| ILMN_1801068 | DACT1     | NM_016651.4    | 4.47 | 2.16 | 10.05 | 7.9   | 3.36E-11 | 9.23E-10 |
| ILMN_1655595 | SERPINE2  | NM_006216.2    | 1.93 | 0.95 | 13.87 | 12.92 | 3.45E-11 | 9.44E-10 |
| ILMN_1813685 | RAB7L1    | NM_003929.1    | 2.08 | 1.06 | 12.09 | 11.03 | 3.45E-11 | 9.44E-10 |
| ILMN_1808117 | C1QL4     | NM_001008223.1 | 3.34 | 1.74 | 9.49  | 7.74  | 3.52E-11 | 9.61E-10 |

Supplementary Table 2

|              |           |                |      |      |       |       |          |          |
|--------------|-----------|----------------|------|------|-------|-------|----------|----------|
| ILMN_1659753 | LAMP2     | NM_002294.1    | 2.19 | 1.13 | 12.72 | 11.6  | 3.55E-11 | 9.69E-10 |
| ILMN_1741350 | CEP70     | NM_024491.2    | 2.51 | 1.33 | 11.16 | 9.83  | 3.6E-11  | 9.79E-10 |
| ILMN_1732071 | HIST2H2BE | NM_003528.2    | 2.19 | 1.13 | 12.85 | 11.72 | 3.64E-11 | 9.9E-10  |
| ILMN_1664001 | ARSF      | NM_004042.3    | 3.23 | 1.69 | 8.89  | 7.2   | 3.8E-11  | 1.03E-09 |
| ILMN_2373831 | BTN3A3    | NM_197974.1    | 2.43 | 1.28 | 10.23 | 8.96  | 3.86E-11 | 1.04E-09 |
| ILMN_2286987 | LOC388419 | NM_001080466.1 | 2.16 | 1.11 | 11.65 | 10.54 | 3.98E-11 | 1.07E-09 |
| ILMN_1701603 | ALPL      | NM_000478.2    | 2.71 | 1.44 | 10.42 | 8.98  | 4E-11    | 1.08E-09 |
| ILMN_1653504 | EDG1      | NM_001400.2    | 3.27 | 1.71 | 10.35 | 8.64  | 4.18E-11 | 1.12E-09 |
| ILMN_1702384 | ZNF706    | NM_016096.2    | 1.99 | 0.99 | 12.26 | 11.28 | 4.18E-11 | 1.12E-09 |
| ILMN_1811820 | KIAA1853  | NM_194286.2    | 2.68 | 1.42 | 9.4   | 7.98  | 4.23E-11 | 1.13E-09 |
| ILMN_1786197 | NR2F1     | NM_005654.4    | 3.81 | 1.93 | 11.01 | 9.08  | 4.25E-11 | 1.14E-09 |
| ILMN_2367753 | ATP2B4    | NM_001684.3    | 2.57 | 1.36 | 12.56 | 11.21 | 4.27E-11 | 1.14E-09 |
| ILMN_1791366 | RCOR2     | NM_173587.2    | 3.14 | 1.65 | 11.87 | 10.22 | 4.31E-11 | 1.15E-09 |
| ILMN_1791226 | NXN       | NM_022463.3    | 2.71 | 1.44 | 11.67 | 10.23 | 4.43E-11 | 1.18E-09 |
| ILMN_1784333 | KIAA0256  | NM_014701.2    | 1.97 | 0.98 | 12.11 | 11.13 | 4.49E-11 | 1.2E-09  |
| ILMN_2399300 | NAV2      | NM_145117.3    | 2.23 | 1.16 | 12.5  | 11.34 | 4.51E-11 | 1.2E-09  |
| ILMN_1796216 | VASH1     | NM_014909.2    | 1.93 | 0.95 | 12.12 | 11.17 | 4.59E-11 | 1.22E-09 |
| ILMN_1692368 | DLX2      | NM_004405.2    | 2.28 | 1.19 | 10.35 | 9.16  | 4.69E-11 | 1.24E-09 |
| ILMN_1796245 | DNASE2    | NM_001375.2    | 2.62 | 1.39 | 13.28 | 11.89 | 4.7E-11  | 1.24E-09 |
| ILMN_2249018 | LOC389816 | NM_001013653.1 | 3.66 | 1.87 | 9.96  | 8.09  | 4.75E-11 | 1.25E-09 |
| ILMN_1792389 | RNF165    | NM_152470.2    | 2.43 | 1.28 | 11.93 | 10.65 | 4.75E-11 | 1.25E-09 |
| ILMN_1685467 | ZNF397    | NM_032347.1    | 2.25 | 1.17 | 10.18 | 9.01  | 4.78E-11 | 1.26E-09 |
| ILMN_1710903 | MAPT      | NM_016834.1    | 4.41 | 2.14 | 11.22 | 9.08  | 4.99E-11 | 1.31E-09 |
| ILMN_1770399 | C10ORF107 | NM_173554.1    | 2.30 | 1.2  | 10.44 | 9.25  | 5.13E-11 | 1.34E-09 |
| ILMN_1669410 | CHGA      | NM_001275.2    | 3.18 | 1.67 | 9.45  | 7.78  | 5.14E-11 | 1.34E-09 |
| ILMN_1654065 | ATOH8     | NM_032827.3    | 2.91 | 1.54 | 11.07 | 9.53  | 5.15E-11 | 1.35E-09 |
| ILMN_2211003 | GAS2L3    | NM_174942.1    | 2.91 | 1.54 | 11.84 | 10.3  | 5.18E-11 | 1.35E-09 |
| ILMN_2197519 | ZNF627    | NM_145295.2    | 2.08 | 1.06 | 12.94 | 11.89 | 5.18E-11 | 1.35E-09 |
| ILMN_1773855 | CPT1C     | NM_152359.1    | 2.25 | 1.17 | 12.87 | 11.7  | 5.55E-11 | 1.44E-09 |
| ILMN_1685750 | RAB3C     | NM_138453.2    | 3.41 | 1.77 | 9.19  | 7.42  | 5.73E-11 | 1.48E-09 |
| ILMN_1805645 | TMTC2     | NM_152588.1    | 5.21 | 2.38 | 11.32 | 8.94  | 5.77E-11 | 1.49E-09 |
| ILMN_1770673 | AKNA      | NM_030767.2    | 2.46 | 1.3  | 10.45 | 9.15  | 5.95E-11 | 1.53E-09 |
| ILMN_2229877 | PCDH18    | NM_019035.2    | 2.57 | 1.36 | 10.01 | 8.65  | 5.98E-11 | 1.53E-09 |
| ILMN_1724480 | AXIN2     | NM_004655.2    | 2.10 | 1.07 | 11.76 | 10.7  | 6E-11    | 1.54E-09 |
| ILMN_1678705 | FLJ35220  | NM_173627.2    | 2.35 | 1.23 | 9.88  | 8.65  | 6.05E-11 | 1.55E-09 |
| ILMN_1671731 | AVP1      | NM_021732.1    | 2.97 | 1.57 | 11.38 | 9.81  | 6.15E-11 | 1.57E-09 |
| ILMN_1723706 | DIP       | NM_015124.2    | 1.88 | 0.91 | 11.04 | 10.12 | 6.21E-11 | 1.58E-09 |
| ILMN_1688801 | JPH3      | NM_020655.2    | 2.14 | 1.1  | 9.97  | 8.86  | 6.32E-11 | 1.61E-09 |
| ILMN_1799860 | PIGM      | NM_145167.1    | 2.48 | 1.31 | 12.39 | 11.08 | 6.52E-11 | 1.65E-09 |
| ILMN_1739942 | ALS2CR13  | NM_173511.2    | 2.10 | 1.07 | 12.6  | 11.52 | 6.59E-11 | 1.66E-09 |
| ILMN_2381899 | OPTN      | NM_001008213.1 | 2.22 | 1.15 | 11.91 | 10.77 | 6.64E-11 | 1.67E-09 |
| ILMN_1749081 | AUTS2     | NM_015570.1    | 1.95 | 0.96 | 12.4  | 11.44 | 6.65E-11 | 1.67E-09 |
| ILMN_1761084 | FNDC5     | NM_153756.1    | 3.51 | 1.81 | 10.49 | 8.68  | 6.78E-11 | 1.7E-09  |

Supplementary Table 2

|              |           |                |      |      |       |       |          |             |
|--------------|-----------|----------------|------|------|-------|-------|----------|-------------|
| ILMN_1792689 | HIST1H2AC | NM_003512.3    | 2.28 | 1.19 | 11.01 | 9.82  | 6.79E-11 | 1.7E-09     |
| ILMN_1670692 | GPR23     | NM_005296.1    | 2.85 | 1.51 | 11.77 | 10.26 | 6.98E-11 | 1.74E-09    |
| ILMN_2315789 | PTPRD     | NM_130391.2    | 3.41 | 1.77 | 10.73 | 8.97  | 7.1E-11  | 1.77E-09    |
| ILMN_1718950 | ZNF433    | NM_152602.1    | 2.43 | 1.28 | 10.64 | 9.35  | 7.39E-11 | 1.84E-09    |
| ILMN_2346727 | MTUS1     | NM_001001924.1 | 2.87 | 1.52 | 10.1  | 8.57  | 7.45E-11 | 1.85E-09    |
| ILMN_1651950 | TPST1     | NM_003596.2    | 2.25 | 1.17 | 13.69 | 12.52 | 7.5E-11  | 1.86E-09    |
| ILMN_1797744 | CGI-38    | NM_015964.2    | 3.41 | 1.77 | 10.49 | 8.72  | 7.83E-11 | 1.93E-09    |
| ILMN_1744138 | CHCHD7    | NM_001011668.1 | 2.06 | 1.04 | 11.33 | 10.29 | 8.03E-11 | 1.97E-09    |
| ILMN_1765636 | FLJ22184  | XM_940456.1    | 2.06 | 1.04 | 10.36 | 9.33  | 8.05E-11 | 1.98E-09    |
| ILMN_1680757 | LOC389816 | XM_939320.1    | 2.81 | 1.49 | 9.48  | 7.99  | 8.07E-11 | 1.98E-09    |
| ILMN_2360307 | SUSD4     | NM_001037175.1 | 2.35 | 1.23 | 9.62  | 8.39  | 8.11E-11 | 1.98E-09    |
| ILMN_1717636 | RGMA      | NM_020211.1    | 2.27 | 1.18 | 15.27 | 14.09 | 8.19E-11 | 0.000000002 |
| ILMN_1695606 | EFNB3     | NM_001406.3    | 1.93 | 0.95 | 12.58 | 11.63 | 8.38E-11 | 2.04E-09    |
| ILMN_1679580 | KCNIP4    | NM_025221.4    | 3.43 | 1.78 | 11.8  | 10.01 | 8.53E-11 | 2.07E-09    |
| ILMN_2074860 | RN7SK     | NR_001445.1    | 4.20 | 2.07 | 11.75 | 9.69  | 8.55E-11 | 2.07E-09    |
| ILMN_1731215 | MYBPHL    | NM_001010985.1 | 2.71 | 1.44 | 9.47  | 8.04  | 8.59E-11 | 2.07E-09    |
| ILMN_2181125 | NAPB      | NM_022080.1    | 2.01 | 1.01 | 11.57 | 10.56 | 8.73E-11 | 2.1E-09     |
| ILMN_1654398 | RGL1      | NM_015149.2    | 1.96 | 0.97 | 13.57 | 12.59 | 8.74E-11 | 2.1E-09     |
| ILMN_1757106 | 6-MAR     | NM_005885.2    | 2.45 | 1.29 | 12.39 | 11.09 | 8.85E-11 | 2.12E-09    |
| ILMN_1802708 | BTN3A1    | NM_007048.3    | 2.20 | 1.14 | 10.74 | 9.61  | 8.85E-11 | 2.12E-09    |
| ILMN_2185866 | PCDHB17   | NR_001280.1    | 2.64 | 1.4  | 11.53 | 10.13 | 8.92E-11 | 2.14E-09    |
| ILMN_1695354 | BMF       | NM_001003942.1 | 3.61 | 1.85 | 9.29  | 7.44  | 8.96E-11 | 2.14E-09    |
| ILMN_2053103 | SLC40A1   | NM_014585.3    | 2.91 | 1.54 | 10.97 | 9.44  | 8.96E-11 | 2.14E-09    |
| ILMN_2157441 | HLA-DRA   | NM_019111.3    | 2.66 | 1.41 | 13.29 | 11.88 | 9.09E-11 | 2.16E-09    |
| ILMN_2165473 | MID1IP1   | NM_021242.3    | 1.88 | 0.91 | 11.95 | 11.04 | 9.11E-11 | 2.17E-09    |
| ILMN_1755974 | ALDOC     | NM_005165.2    | 2.38 | 1.25 | 13.13 | 11.88 | 9.12E-11 | 2.17E-09    |
| ILMN_1708805 | NCOA3     | NM_006534.2    | 2.08 | 1.06 | 11.24 | 10.18 | 9.37E-11 | 2.22E-09    |
| ILMN_1701557 | WBSCR17   | NM_022479.1    | 2.83 | 1.5  | 10.29 | 8.79  | 9.46E-11 | 2.24E-09    |
| ILMN_1706682 | SCRT2     | NM_033129.1    | 3.36 | 1.75 | 9.22  | 7.47  | 9.59E-11 | 2.27E-09    |
| ILMN_1735038 | 3-MAR     | NM_178450.2    | 2.85 | 1.51 | 9.91  | 8.4   | 9.76E-11 | 2.3E-09     |
| ILMN_1677376 | CHD7      | NM_017780.2    | 2.16 | 1.11 | 12.44 | 11.33 | 9.95E-11 | 2.35E-09    |
| ILMN_1656415 | CDKN2C    | NM_078626.1    | 3.14 | 1.65 | 10.87 | 9.22  | 9.99E-11 | 2.35E-09    |
| ILMN_1726786 | TNRC6B    | NM_001024843.1 | 2.10 | 1.07 | 12.13 | 11.06 | 1.04E-10 | 2.43E-09    |
| ILMN_2141482 | SERPINF1  | NM_002615.4    | 2.73 | 1.45 | 8.92  | 7.46  | 1.05E-10 | 2.47E-09    |
| ILMN_1655117 | WDR19     | NM_025132.3    | 2.36 | 1.24 | 12.57 | 11.33 | 1.06E-10 | 2.48E-09    |
| ILMN_2315208 | CAMK2B    | NM_172078.1    | 2.62 | 1.39 | 10.17 | 8.78  | 1.07E-10 | 2.5E-09     |
| ILMN_2400947 | CUGBP2    | NM_006561.2    | 1.89 | 0.92 | 12.22 | 11.3  | 1.08E-10 | 2.52E-09    |
| ILMN_1761733 | HLA-DMB   | NM_002118.3    | 2.93 | 1.55 | 10.84 | 9.29  | 1.09E-10 | 2.54E-09    |
| ILMN_1779347 | GARNL3    | NM_032293.3    | 2.27 | 1.18 | 10.41 | 9.23  | 1.15E-10 | 2.67E-09    |
| ILMN_1768534 | BHLHB2    | NM_003670.1    | 2.04 | 1.03 | 12.94 | 11.91 | 1.16E-10 | 2.68E-09    |
| ILMN_1659688 | LGALS3BP  | NM_005567.2    | 2.51 | 1.33 | 13.89 | 12.56 | 1.17E-10 | 2.7E-09     |
| ILMN_2380566 | SIAH1     | NM_001006610.1 | 1.91 | 0.93 | 13.07 | 12.14 | 1.21E-10 | 2.78E-09    |
| ILMN_2401978 | STAT3     | NM_213662.1    | 2.08 | 1.06 | 13.59 | 12.54 | 1.22E-10 | 2.8E-09     |

Supplementary Table 2

|              |           |                |      |      |       |       |          |          |
|--------------|-----------|----------------|------|------|-------|-------|----------|----------|
| ILMN_1772686 | FGD3      | NM_033086.1    | 6.36 | 2.67 | 11.14 | 8.47  | 1.24E-10 | 2.85E-09 |
| ILMN_1751452 | NDFIP1    | NM_030571.2    | 2.91 | 1.54 | 13.02 | 11.49 | 1.27E-10 | 2.91E-09 |
| ILMN_1693882 | FLJ90013  | NM_153365.1    | 3.12 | 1.64 | 11.6  | 9.95  | 1.28E-10 | 2.94E-09 |
| ILMN_1771652 | BAIAP2L2  | NM_025045.3    | 2.45 | 1.29 | 9.33  | 8.04  | 1.3E-10  | 2.98E-09 |
| ILMN_1694325 | NFIX      | NM_002501.2    | 1.83 | 0.87 | 14.58 | 13.71 | 1.3E-10  | 2.98E-09 |
| ILMN_1760208 | GDAP1L1   | NM_024034.3    | 2.46 | 1.3  | 9.34  | 8.04  | 1.34E-10 | 3.06E-09 |
| ILMN_2107184 | SNRK      | NM_017719.3    | 1.97 | 0.98 | 12.17 | 11.2  | 1.39E-10 | 3.17E-09 |
| ILMN_2150258 | ZFP36L2   | NM_006887.3    | 1.93 | 0.95 | 11.93 | 10.98 | 1.4E-10  | 3.17E-09 |
| ILMN_1651347 | SERTAD2   | NM_014755.1    | 1.93 | 0.95 | 13.19 | 12.24 | 1.42E-10 | 3.22E-09 |
| ILMN_1709590 | PGM5      | XM_936702.1    | 2.58 | 1.37 | 10.52 | 9.15  | 1.44E-10 | 3.26E-09 |
| ILMN_1719010 | ARL4D     | NM_001661.2    | 2.66 | 1.41 | 9.97  | 8.56  | 1.48E-10 | 3.33E-09 |
| ILMN_1658989 | RKHD3     | NM_032246.3    | 2.79 | 1.48 | 12.29 | 10.81 | 1.49E-10 | 3.35E-09 |
| ILMN_1774733 | SOCS1     | NM_003745.1    | 2.89 | 1.53 | 9.28  | 7.74  | 1.49E-10 | 3.35E-09 |
| ILMN_1682864 | SPSB3     | NM_080861.3    | 2.51 | 1.33 | 12.91 | 11.59 | 1.53E-10 | 3.43E-09 |
| ILMN_1743104 | RBM4B     | NM_031492.2    | 1.96 | 0.97 | 13.38 | 12.42 | 1.57E-10 | 3.51E-09 |
| ILMN_1695959 | C21ORF63  | NM_058187.3    | 1.82 | 0.86 | 12.1  | 11.25 | 1.58E-10 | 3.54E-09 |
| ILMN_1739214 | TMPRSS5   | NM_030770.1    | 2.75 | 1.46 | 9.81  | 8.34  | 1.59E-10 | 3.55E-09 |
| ILMN_1657983 | TERF2IP   | NM_018975.2    | 1.91 | 0.93 | 14.06 | 13.13 | 1.63E-10 | 3.63E-09 |
| ILMN_1710495 | PAPLN     | NM_173462.2    | 4.03 | 2.01 | 9.45  | 7.44  | 1.66E-10 | 3.69E-09 |
| ILMN_1815086 | NINJ1     | NM_004148.2    | 2.17 | 1.12 | 13.07 | 11.95 | 1.69E-10 | 3.73E-09 |
| ILMN_1724070 | MAP3K14   | NM_003954.1    | 2.07 | 1.05 | 10.03 | 8.98  | 1.69E-10 | 3.73E-09 |
| ILMN_1810962 | PTPRK     | NM_002844.2    | 3.29 | 1.72 | 11.23 | 9.51  | 1.69E-10 | 3.73E-09 |
| ILMN_2361862 | VLDLR     | NM_001018056.1 | 2.53 | 1.34 | 12    | 10.66 | 1.7E-10  | 3.75E-09 |
| ILMN_1684158 | GPT2      | NM_133443.1    | 1.93 | 0.95 | 14.01 | 13.05 | 1.72E-10 | 3.79E-09 |
| ILMN_1811719 | MYO7A     | NM_000260.1    | 3.86 | 1.95 | 9.46  | 7.51  | 1.72E-10 | 3.8E-09  |
| ILMN_1811972 | MYCBP2    | NM_015057.2    | 2.23 | 1.16 | 11.43 | 10.27 | 1.73E-10 | 3.8E-09  |
| ILMN_1707077 | SORT1     | NM_002959.4    | 2.35 | 1.23 | 14.42 | 13.19 | 1.74E-10 | 3.83E-09 |
| ILMN_1661833 | ANKRD12   | NM_015208.2    | 3.01 | 1.59 | 11.64 | 10.05 | 1.75E-10 | 3.84E-09 |
| ILMN_1712523 | MAP6      | NM_207577.1    | 2.14 | 1.1  | 11.99 | 10.89 | 1.77E-10 | 3.89E-09 |
| ILMN_1657760 | SYT17     | NM_016524.2    | 2.13 | 1.09 | 12.41 | 11.32 | 1.79E-10 | 3.91E-09 |
| ILMN_1794384 | AMBN      | NM_016519.4    | 4.08 | 2.03 | 9.98  | 7.96  | 1.85E-10 | 4.03E-09 |
| ILMN_1772514 | LOC124842 | NM_207313.1    | 2.25 | 1.17 | 9.9   | 8.74  | 1.86E-10 | 4.06E-09 |
| ILMN_1656951 | APCDD1    | NM_153000.3    | 2.30 | 1.2  | 10.75 | 9.56  | 1.87E-10 | 4.08E-09 |
| ILMN_2141118 | LOC388135 | NM_001039614.1 | 1.82 | 0.86 | 12.68 | 11.81 | 1.91E-10 | 4.17E-09 |
| ILMN_1711203 | C6ORF15   | NM_014070.1    | 5.58 | 2.48 | 10.9  | 8.42  | 1.99E-10 | 4.32E-09 |
| ILMN_1663397 | CAMK2B    | XM_936314.1    | 2.41 | 1.27 | 10.27 | 9     | 2.04E-10 | 4.42E-09 |
| ILMN_1708029 | C9ORF127  | NM_016446.2    | 1.92 | 0.94 | 12.86 | 11.93 | 2.07E-10 | 4.47E-09 |
| ILMN_1665425 | RPRM      | NM_019845.2    | 2.91 | 1.54 | 10.15 | 8.61  | 2.09E-10 | 4.51E-09 |
| ILMN_1658080 | ZNF573    | NM_152360.2    | 1.99 | 0.99 | 11.48 | 10.49 | 2.16E-10 | 4.64E-09 |
| ILMN_1700695 | SLC44A1   | NM_080546.2    | 2.11 | 1.08 | 13.57 | 12.49 | 2.16E-10 | 4.64E-09 |
| ILMN_1733538 | RGS10     | NM_002925.3    | 2.55 | 1.35 | 11.34 | 9.99  | 2.17E-10 | 4.65E-09 |
| ILMN_2148668 | RCBTB2    | NM_001268.2    | 3.25 | 1.7  | 11.91 | 10.21 | 2.18E-10 | 4.68E-09 |
| ILMN_2146389 | MEGF10    | NM_032446.1    | 3.34 | 1.74 | 11.21 | 9.47  | 2.2E-10  | 4.71E-09 |

Supplementary Table 2

|              |           |                |      |      |       |       |          |             |
|--------------|-----------|----------------|------|------|-------|-------|----------|-------------|
| ILMN_2120695 | TSPAN7    | NM_004615.2    | 1.85 | 0.89 | 13.01 | 12.13 | 2.27E-10 | 4.84E-09    |
| ILMN_1813139 | ANKDD1A   | NM_182703.2    | 2.20 | 1.14 | 11.1  | 9.96  | 2.31E-10 | 4.91E-09    |
| ILMN_1777591 | C10ORF65  | NM_138413.2    | 2.85 | 1.51 | 10.46 | 8.95  | 2.35E-10 | 0.000000005 |
| ILMN_1667893 | TNS3      | NM_022748.9    | 2.23 | 1.16 | 12.06 | 10.9  | 2.41E-10 | 5.11E-09    |
| ILMN_1808405 | HLA-DQA1  | XM_936120.1    | 3.39 | 1.76 | 9.32  | 7.56  | 2.43E-10 | 5.15E-09    |
| ILMN_1672717 | C10ORF57  | NM_025125.2    | 1.85 | 0.89 | 11.79 | 10.9  | 2.46E-10 | 5.2E-09     |
| ILMN_2372698 | RGN       | NM_152869.2    | 3.61 | 1.85 | 9.89  | 8.05  | 2.49E-10 | 5.23E-09    |
| ILMN_1813175 | LPHN1     | NM_014921.3    | 1.89 | 0.92 | 11.94 | 11.02 | 2.64E-10 | 5.51E-09    |
| ILMN_1698846 | SLC8A2    | NM_015063.1    | 4.17 | 2.06 | 9.96  | 7.9   | 2.69E-10 | 5.62E-09    |
| ILMN_1815057 | PDGFRB    | NM_002609.3    | 2.64 | 1.4  | 11.2  | 9.8   | 2.74E-10 | 5.69E-09    |
| ILMN_2344221 | LOC150084 | NM_001080444.1 | 2.22 | 1.15 | 10.97 | 9.82  | 2.75E-10 | 5.71E-09    |
| ILMN_1657087 | ZNF533    | NM_152520.3    | 3.16 | 1.66 | 9.2   | 7.54  | 2.8E-10  | 5.8E-09     |
| ILMN_1705302 | FCGRT     | NM_004107.3    | 2.07 | 1.05 | 12.14 | 11.09 | 2.87E-10 | 5.94E-09    |
| ILMN_1815319 | CMTM4     | NM_178818.2    | 2.08 | 1.06 | 12.47 | 11.41 | 2.88E-10 | 5.96E-09    |
| ILMN_1693338 | CYP1B1    | NM_000104.2    | 3.76 | 1.91 | 9.42  | 7.51  | 3.17E-10 | 6.48E-09    |
| ILMN_1742025 | OLFM1     | NM_014279.2    | 2.23 | 1.16 | 10.41 | 9.25  | 3.18E-10 | 6.49E-09    |
| ILMN_1805992 | KIAA1598  | NM_018330.3    | 2.08 | 1.06 | 11.96 | 10.9  | 3.22E-10 | 6.57E-09    |
| ILMN_1659206 | RARA      | NM_001024809.2 | 1.95 | 0.96 | 13.3  | 12.34 | 3.22E-10 | 6.57E-09    |
| ILMN_1707124 | TFPI      | NM_006287.3    | 1.91 | 0.93 | 11.32 | 10.4  | 3.28E-10 | 6.65E-09    |
| ILMN_2387712 | AK5       | NM_012093.2    | 3.46 | 1.79 | 9.55  | 7.77  | 3.28E-10 | 6.65E-09    |
| ILMN_2343264 | PRDM16    | NM_022114.2    | 2.89 | 1.53 | 10.98 | 9.46  | 3.36E-10 | 6.8E-09     |
| ILMN_1760490 | ACVR1     | NM_001105.2    | 2.58 | 1.37 | 13.01 | 11.64 | 3.45E-10 | 6.98E-09    |
| ILMN_1717261 | HLA-DRB3  | NM_022555.3    | 2.85 | 1.51 | 10.09 | 8.57  | 3.5E-10  | 7.07E-09    |
| ILMN_1762606 | AQP11     | NM_173039.1    | 2.13 | 1.09 | 11.34 | 10.25 | 3.53E-10 | 7.12E-09    |
| ILMN_2087692 | CYBRD1    | NM_024843.2    | 2.10 | 1.07 | 12.94 | 11.88 | 3.61E-10 | 7.27E-09    |
| ILMN_2314140 | PAX6      | NM_001604.3    | 2.11 | 1.08 | 11.13 | 10.05 | 3.63E-10 | 7.3E-09     |
| ILMN_1689111 | CXCL12    | NM_001033886.1 | 2.69 | 1.43 | 11.38 | 9.94  | 3.78E-10 | 7.57E-09    |
| ILMN_1708858 | CSNK1E    | NM_152221.2    | 2.17 | 1.12 | 12.92 | 11.8  | 3.86E-10 | 7.73E-09    |
| ILMN_1802190 | FOXJ1     | NM_001454.2    | 2.07 | 1.05 | 9.73  | 8.68  | 4.18E-10 | 8.31E-09    |
| ILMN_1686750 | MGEA5     | NM_012215.1    | 2.53 | 1.34 | 13.77 | 12.43 | 4.2E-10  | 8.33E-09    |
| ILMN_2366490 | ZNF706    | NM_001042511.1 | 1.92 | 0.94 | 11.9  | 10.96 | 4.2E-10  | 8.33E-09    |
| ILMN_1692664 | PRR5      | NM_001017530.1 | 2.46 | 1.3  | 10.03 | 8.73  | 4.3E-10  | 8.48E-09    |
| ILMN_2399769 | GPR177    | NM_001002292.1 | 2.87 | 1.52 | 12.62 | 11.1  | 4.31E-10 | 8.49E-09    |
| ILMN_2071809 | MGP       | NM_000900.2    | 2.68 | 1.42 | 9.75  | 8.33  | 4.32E-10 | 8.52E-09    |
| ILMN_1789733 | CLIPR-59  | NM_015526.1    | 2.00 | 1    | 14.93 | 13.93 | 4.44E-10 | 8.72E-09    |
| ILMN_1658356 | DKFZP586H | NM_001001991.1 | 3.01 | 1.59 | 9.52  | 7.93  | 4.45E-10 | 8.75E-09    |
| ILMN_1786720 | PROM1     | NM_006017.1    | 1.93 | 0.95 | 13.56 | 12.61 | 4.47E-10 | 8.78E-09    |
| ILMN_2086890 | ANGPT1    | NM_001146.3    | 2.97 | 1.57 | 10    | 8.43  | 4.55E-10 | 8.91E-09    |
| ILMN_2056032 | CD99      | NM_002414.3    | 2.16 | 1.11 | 12.81 | 11.71 | 4.59E-10 | 8.95E-09    |
| ILMN_1745217 | FLJ10081  | NM_017991.3    | 2.35 | 1.23 | 12.62 | 11.39 | 4.63E-10 | 9.02E-09    |
| ILMN_2193706 | HRK       | NM_003806.1    | 2.51 | 1.33 | 8.73  | 7.4   | 4.64E-10 | 9.03E-09    |
| ILMN_1744795 | TBL1X     | NM_005647.2    | 2.28 | 1.19 | 12.43 | 11.24 | 4.71E-10 | 9.15E-09    |
| ILMN_2149164 | SFRP1     | NM_003012.3    | 2.06 | 1.04 | 11.87 | 10.82 | 4.72E-10 | 9.17E-09    |

Supplementary Table 2

|              |           |                |      |      |       |       |          |             |
|--------------|-----------|----------------|------|------|-------|-------|----------|-------------|
| ILMN_1779241 | CRYM      | NM_001888.2    | 2.60 | 1.38 | 10.16 | 8.78  | 4.77E-10 | 9.24E-09    |
| ILMN_1694608 | C1QTNF1   | NM_030968.2    | 3.92 | 1.97 | 9.68  | 7.72  | 4.78E-10 | 9.25E-09    |
| ILMN_1691290 | CELSR3    | NM_001407.1    | 2.19 | 1.13 | 11.99 | 10.86 | 4.82E-10 | 9.31E-09    |
| ILMN_1682095 | RCOR3     | NM_018254.2    | 1.82 | 0.86 | 12.2  | 11.34 | 4.82E-10 | 9.31E-09    |
| ILMN_1675038 | PRMT2     | NM_206962.1    | 2.04 | 1.03 | 13.7  | 12.68 | 5.02E-10 | 9.65E-09    |
| ILMN_1730504 | AGPAT4    | NM_001012734.1 | 2.03 | 1.02 | 12.15 | 11.13 | 5.11E-10 | 9.82E-09    |
| ILMN_2243308 | ACVR1B    | NM_004302.3    | 2.16 | 1.11 | 12.87 | 11.75 | 5.13E-10 | 9.84E-09    |
| ILMN_1758672 | FAM107B   | NM_031453.2    | 1.93 | 0.95 | 12.08 | 11.14 | 5.14E-10 | 9.85E-09    |
| ILMN_1743241 | ARL4      | NM_005738.2    | 2.73 | 1.45 | 10.63 | 9.18  | 5.22E-10 | 9.98E-09    |
| ILMN_1685854 | LOC492311 | NM_001007189.1 | 4.32 | 2.11 | 10.72 | 8.61  | 5.27E-10 | 1.01E-08    |
| ILMN_1669709 | TMEM108   | NM_023943.1    | 1.95 | 0.96 | 12.16 | 11.2  | 5.29E-10 | 1.01E-08    |
| ILMN_1651642 | GPC2      | NM_152742.1    | 2.08 | 1.06 | 12.29 | 11.23 | 5.34E-10 | 1.02E-08    |
| ILMN_1810836 | PDE5A     | NM_033437.2    | 2.57 | 1.36 | 9.25  | 7.89  | 5.46E-10 | 1.04E-08    |
| ILMN_2054607 | CYP4V2    | NM_207352.2    | 1.91 | 0.93 | 11.58 | 10.65 | 5.5E-10  | 1.05E-08    |
| ILMN_1744949 | RHOBTB3   | NM_014899.2    | 2.00 | 1    | 14.42 | 13.42 | 5.52E-10 | 1.05E-08    |
| ILMN_1783185 | SOX21     | NM_007084.2    | 1.92 | 0.94 | 14.35 | 13.41 | 5.52E-10 | 1.05E-08    |
| ILMN_2356111 | SLC41A3   | NM_017836.3    | 1.73 | 0.79 | 12.29 | 11.5  | 5.53E-10 | 1.05E-08    |
| ILMN_1814369 | C21ORF62  | NM_019596.2    | 1.97 | 0.98 | 13.41 | 12.44 | 5.56E-10 | 1.05E-08    |
| ILMN_1805902 | ELA1      | NM_001971.4    | 2.79 | 1.48 | 9.01  | 7.53  | 5.61E-10 | 1.06E-08    |
| ILMN_1652525 | C9ORF28   | NM_033446.1    | 2.13 | 1.09 | 12.58 | 11.5  | 5.63E-10 | 1.07E-08    |
| ILMN_1712046 | CPXM      | NM_019609.3    | 1.88 | 0.91 | 11.73 | 10.82 | 5.65E-10 | 1.07E-08    |
| ILMN_1721106 | C14ORF159 | NM_024952.4    | 1.69 | 0.76 | 12.12 | 11.36 | 5.66E-10 | 1.07E-08    |
| ILMN_1774208 | B3GAT2    | NM_080742.1    | 3.10 | 1.63 | 9.07  | 7.44  | 5.72E-10 | 1.08E-08    |
| ILMN_1656285 | METTL7A   | NM_014033.2    | 2.60 | 1.38 | 9.79  | 8.4   | 5.84E-10 | 0.000000011 |
| ILMN_2109197 | EPB41L3   | NM_012307.2    | 2.03 | 1.02 | 14.26 | 13.24 | 5.98E-10 | 1.12E-08    |
| ILMN_2388397 | LYPD1     | NM_001077427.2 | 2.30 | 1.2  | 12.54 | 11.33 | 6.08E-10 | 1.14E-08    |
| ILMN_1656045 | BRUNOL6   | NM_052840.3    | 3.16 | 1.66 | 9.44  | 7.78  | 6.09E-10 | 1.14E-08    |
| ILMN_1773459 | SOX11     | NM_003108.3    | 1.85 | 0.89 | 14.38 | 13.48 | 6.18E-10 | 1.15E-08    |
| ILMN_1699723 | RARB      | NM_000965.2    | 2.48 | 1.31 | 9.29  | 7.98  | 6.22E-10 | 1.16E-08    |
| ILMN_2151056 | C10ORF32  | NM_144591.1    | 1.87 | 0.9  | 12.28 | 11.38 | 6.26E-10 | 1.16E-08    |
| ILMN_1720513 | SETBP1    | NM_015559.1    | 2.45 | 1.29 | 12.35 | 11.06 | 6.3E-10  | 1.17E-08    |
| ILMN_2390526 | RARB      | NM_016152.2    | 3.07 | 1.62 | 9.03  | 7.42  | 6.45E-10 | 1.19E-08    |
| ILMN_2223941 | FBLN5     | NM_006329.2    | 2.39 | 1.26 | 10.79 | 9.53  | 6.52E-10 | 0.000000012 |
| ILMN_1743373 | DLL1      | NM_005618.2    | 1.73 | 0.79 | 11.87 | 11.08 | 6.52E-10 | 0.000000012 |
| ILMN_2228732 | CCNG2     | NM_004354.1    | 2.60 | 1.38 | 11.23 | 9.85  | 6.54E-10 | 1.21E-08    |
| ILMN_2178587 | ANKRD6    | NM_014942.2    | 2.35 | 1.23 | 10.48 | 9.24  | 6.56E-10 | 1.21E-08    |
| ILMN_1731374 | CPE       | NM_001873.1    | 2.62 | 1.39 | 11.85 | 10.46 | 6.67E-10 | 1.23E-08    |
| ILMN_1687384 | G1P3      | NM_002038.2    | 2.20 | 1.14 | 13.55 | 12.41 | 6.7E-10  | 1.23E-08    |
| ILMN_1728663 | IL17RD    | NM_017563.1    | 1.89 | 0.92 | 10.1  | 9.18  | 6.75E-10 | 1.24E-08    |
| ILMN_2387952 | FLJ20152  | NM_001034850.1 | 2.28 | 1.19 | 12.54 | 11.35 | 6.93E-10 | 1.27E-08    |
| ILMN_1765990 | KCNK2     | NM_001017424.1 | 2.81 | 1.49 | 10.25 | 8.76  | 6.96E-10 | 1.27E-08    |
| ILMN_1779886 | TBC1D14   | NM_020773.1    | 2.00 | 1    | 13.11 | 12.11 | 6.97E-10 | 1.28E-08    |
| ILMN_1670807 | FAM84B    | NM_174911.3    | 1.82 | 0.86 | 13.77 | 12.91 | 7.06E-10 | 1.29E-08    |

Supplementary Table 2

|              |          |                |      |      |       |       |          |             |
|--------------|----------|----------------|------|------|-------|-------|----------|-------------|
| ILMN_1751020 | PACSIN1  | NM_020804.2    | 3.03 | 1.6  | 9.04  | 7.44  | 7.12E-10 | 0.000000013 |
| ILMN_1716552 | ENAH     | NM_018212.4    | 2.14 | 1.1  | 12.97 | 11.88 | 7.21E-10 | 1.31E-08    |
| ILMN_1788604 | WBP2     | NM_012478.2    | 1.68 | 0.75 | 15.33 | 14.58 | 7.27E-10 | 1.33E-08    |
| ILMN_1804988 | MOAP1    | NM_022151.4    | 1.87 | 0.9  | 12.54 | 11.64 | 7.32E-10 | 1.33E-08    |
| ILMN_1694084 | PSCD1    | NM_017456.2    | 1.92 | 0.94 | 12.51 | 11.57 | 7.34E-10 | 1.33E-08    |
| ILMN_2172497 | LPPR4    | NM_014839.3    | 3.20 | 1.68 | 11.54 | 9.85  | 7.36E-10 | 1.34E-08    |
| ILMN_2317543 | ITGB4    | NM_001005731.1 | 4.41 | 2.14 | 10.06 | 7.92  | 7.4E-10  | 1.34E-08    |
| ILMN_1680738 | C5ORF13  | NM_004772.1    | 1.87 | 0.9  | 15.02 | 14.12 | 7.42E-10 | 1.35E-08    |
| ILMN_1773742 | DNAJB9   | NM_012328.1    | 1.99 | 0.99 | 11.86 | 10.86 | 7.47E-10 | 1.35E-08    |
| ILMN_1742881 | SYT1     | NM_005639.1    | 2.39 | 1.26 | 9.96  | 8.7   | 7.62E-10 | 1.38E-08    |
| ILMN_1814710 | PCDHB5   | NM_015669.2    | 1.78 | 0.83 | 11.79 | 10.96 | 7.68E-10 | 1.39E-08    |
| ILMN_1680154 | MAP1B    | NM_005909.2    | 2.03 | 1.02 | 13.61 | 12.59 | 7.87E-10 | 1.42E-08    |
| ILMN_1793915 | MXI1     | NM_130439.3    | 1.96 | 0.97 | 9.57  | 8.6   | 7.9E-10  | 1.42E-08    |
| ILMN_2095133 | SPTAN1   | NM_003127.1    | 2.27 | 1.18 | 12.94 | 11.76 | 8.03E-10 | 1.44E-08    |
| ILMN_1713835 | UNQ470   | NM_198573.2    | 2.25 | 1.17 | 12.09 | 10.92 | 8.15E-10 | 1.46E-08    |
| ILMN_1747968 | RBM33    | NM_001008408.1 | 2.16 | 1.11 | 11.54 | 10.43 | 8.31E-10 | 1.49E-08    |
| ILMN_1753312 | PLXDC2   | NM_032812.7    | 3.43 | 1.78 | 9.6   | 7.82  | 8.48E-10 | 1.52E-08    |
| ILMN_1683854 | ZNF484   | NM_031486.1    | 1.95 | 0.96 | 10.57 | 9.61  | 8.59E-10 | 1.53E-08    |
| ILMN_1815023 | PIM1     | NM_002648.2    | 2.31 | 1.21 | 10.64 | 9.43  | 8.66E-10 | 1.54E-08    |
| ILMN_1809695 | CAMK2G   | NM_172169.1    | 1.80 | 0.85 | 12.22 | 11.37 | 8.86E-10 | 1.58E-08    |
| ILMN_1657361 | CBX7     | NM_175709.2    | 2.89 | 1.53 | 10.24 | 8.71  | 9.19E-10 | 1.63E-08    |
| ILMN_2185845 | BRSK1    | NM_032430.1    | 1.95 | 0.96 | 13.24 | 12.28 | 9.26E-10 | 1.64E-08    |
| ILMN_1705848 | CXORF44  | NM_138362.1    | 1.79 | 0.84 | 10.67 | 9.83  | 9.31E-10 | 1.65E-08    |
| ILMN_1749115 | RTN2     | NM_206902.1    | 2.19 | 1.13 | 9.63  | 8.5   | 9.5E-10  | 1.68E-08    |
| ILMN_2400759 | CPVL     | NM_031311.3    | 1.97 | 0.98 | 12.93 | 11.96 | 9.62E-10 | 0.000000017 |
| ILMN_1736828 | CHST10   | NM_004854.3    | 2.07 | 1.05 | 13.01 | 11.95 | 1E-09    | 1.77E-08    |
| ILMN_2396272 | PDCD4    | NM_145341.2    | 1.79 | 0.84 | 12.55 | 11.71 | 1.01E-09 | 1.78E-08    |
| ILMN_1772218 | HLA-DPA1 | NM_033554.2    | 3.20 | 1.68 | 11.38 | 9.7   | 1.01E-09 | 1.78E-08    |
| ILMN_1746276 | EPC1     | NM_025209.2    | 3.34 | 1.74 | 11.04 | 9.3   | 1.03E-09 | 1.82E-08    |
| ILMN_1674034 | H2AFY    | NM_138609.1    | 1.88 | 0.91 | 12.3  | 11.39 | 1.04E-09 | 1.83E-08    |
| ILMN_1740490 | ZNF545   | NM_133466.1    | 1.97 | 0.98 | 10.69 | 9.7   | 1.05E-09 | 1.83E-08    |
| ILMN_1729691 | SLC16A6  | NM_004694.2    | 4.41 | 2.14 | 9.73  | 7.59  | 1.06E-09 | 1.84E-08    |
| ILMN_1780831 | SLC6A12  | NM_003044.2    | 2.46 | 1.3  | 8.98  | 7.69  | 1.06E-09 | 1.85E-08    |
| ILMN_1698441 | MYST4    | NM_012330.1    | 2.79 | 1.48 | 10.64 | 9.16  | 1.06E-09 | 1.85E-08    |
| ILMN_1808587 | ATBF1    | NM_006885.2    | 2.45 | 1.29 | 11.21 | 9.92  | 1.07E-09 | 1.86E-08    |
| ILMN_1750706 | ZNF312   | NM_018008.2    | 3.46 | 1.79 | 9.69  | 7.89  | 1.09E-09 | 1.88E-08    |
| ILMN_2058795 | PGCP     | NM_016134.2    | 1.92 | 0.94 | 11.18 | 10.24 | 1.1E-09  | 1.91E-08    |
| ILMN_1785424 | ABLIM1   | NM_006720.3    | 2.16 | 1.11 | 12.67 | 11.56 | 1.11E-09 | 1.91E-08    |
| ILMN_1736567 | CD74     | NM_001025158.1 | 3.53 | 1.82 | 11.83 | 10.01 | 1.11E-09 | 1.91E-08    |
| ILMN_2124816 | ZNF34    | NM_030580.2    | 1.74 | 0.8  | 10.61 | 9.81  | 1.11E-09 | 1.92E-08    |
| ILMN_1710092 | BTBD4    | NM_025224.2    | 2.64 | 1.4  | 10.74 | 9.34  | 1.11E-09 | 1.92E-08    |
| ILMN_1670130 | ARID3A   | NM_005224.1    | 1.95 | 0.96 | 10.56 | 9.6   | 1.14E-09 | 1.96E-08    |
| ILMN_2130441 | HLA-H    | NR_001434.1    | 1.77 | 0.82 | 13.78 | 12.95 | 1.16E-09 | 1.99E-08    |



Supplementary Table 2

|              |           |                |      |      |       |       |          |             |
|--------------|-----------|----------------|------|------|-------|-------|----------|-------------|
| ILMN_1687556 | LOC92196  | NM_001017920.1 | 2.93 | 1.55 | 10.66 | 9.1   | 1.17E-09 | 0.00000002  |
| ILMN_1653200 | SLC22A17  | NM_016609.3    | 1.92 | 0.94 | 13.57 | 12.63 | 1.19E-09 | 2.05E-08    |
| ILMN_1735402 | WDR22     | NM_003861.1    | 1.80 | 0.85 | 12.64 | 11.78 | 1.2E-09  | 2.05E-08    |
| ILMN_1707323 | PDZRN4    | NM_013377.2    | 2.17 | 1.12 | 9.2   | 8.08  | 1.23E-09 | 0.000000021 |
| ILMN_1729075 | PTHR2     | NM_005048.2    | 2.91 | 1.54 | 9.03  | 7.48  | 1.24E-09 | 2.12E-08    |
| ILMN_1663866 | TGFBI     | NM_000358.1    | 3.46 | 1.79 | 11.2  | 9.41  | 1.28E-09 | 2.18E-08    |
| ILMN_1742935 | ZNF11B    | NM_006955.1    | 1.82 | 0.86 | 11.43 | 10.57 | 1.3E-09  | 2.21E-08    |
| ILMN_2129572 | F3        | NM_001993.2    | 4.17 | 2.06 | 10.86 | 8.8   | 1.3E-09  | 2.21E-08    |
| ILMN_1783606 | MLL5      | NM_018682.2    | 2.43 | 1.28 | 10.34 | 9.06  | 1.35E-09 | 2.28E-08    |
| ILMN_1807767 | KIAA0182  | NM_014615.1    | 2.07 | 1.05 | 13.43 | 12.38 | 1.35E-09 | 2.28E-08    |
| ILMN_1726512 | ZSCAN2    | NM_181877.3    | 1.96 | 0.97 | 11.68 | 10.71 | 1.37E-09 | 2.31E-08    |
| ILMN_2243687 | LAMP2     | NM_002294.1    | 2.36 | 1.24 | 13.01 | 11.77 | 1.39E-09 | 2.34E-08    |
| ILMN_1762696 | C14ORF152 | NM_138344.2    | 2.19 | 1.13 | 12.59 | 11.46 | 1.4E-09  | 2.35E-08    |
| ILMN_2407851 | IL17RD    | NM_001080973.1 | 2.00 | 1    | 11.88 | 10.88 | 1.41E-09 | 2.36E-08    |
| ILMN_2151281 | GABARAPL1 | NM_031412.2    | 1.75 | 0.81 | 12.74 | 11.93 | 1.41E-09 | 2.36E-08    |
| ILMN_2402581 | GCOM1     | NM_001018100.1 | 2.71 | 1.44 | 8.81  | 7.36  | 1.43E-09 | 2.38E-08    |
| ILMN_1764764 | MUM1      | NM_032853.2    | 2.04 | 1.03 | 12.98 | 11.94 | 1.46E-09 | 2.42E-08    |
| ILMN_1752294 | PCDH9     | NM_020403.3    | 2.22 | 1.15 | 10.83 | 9.68  | 1.46E-09 | 2.42E-08    |
| ILMN_1737426 | PCMTD1    | NM_052937.1    | 2.31 | 1.21 | 10.71 | 9.5   | 1.49E-09 | 2.47E-08    |
| ILMN_1705928 | ASCC3L1   | NM_014014.2    | 2.58 | 1.37 | 11.51 | 10.14 | 1.5E-09  | 2.49E-08    |
| ILMN_1797277 | KIF3C     | NM_002254.5    | 1.96 | 0.97 | 12.01 | 11.04 | 1.51E-09 | 0.000000025 |
| ILMN_1784678 | PBX1      | NM_002585.1    | 1.91 | 0.93 | 11.05 | 10.12 | 1.55E-09 | 2.55E-08    |
| ILMN_1753345 | SCAMP5    | NM_138967.2    | 1.89 | 0.92 | 11.75 | 10.83 | 1.55E-09 | 2.56E-08    |
| ILMN_1787127 | SLC43A2   | NM_152346.1    | 2.81 | 1.49 | 11.77 | 10.28 | 1.6E-09  | 2.64E-08    |
| ILMN_1737025 | PLCL2     | NM_015184.2    | 1.91 | 0.93 | 10.98 | 10.05 | 1.63E-09 | 2.67E-08    |
| ILMN_2153485 | NMNAT3    | NM_178177.2    | 2.07 | 1.05 | 9.93  | 8.87  | 1.66E-09 | 2.72E-08    |
| ILMN_1775235 | AFF3      | NM_002285.2    | 3.86 | 1.95 | 10.23 | 8.27  | 1.68E-09 | 2.75E-08    |
| ILMN_1654851 | C2ORF17   | NM_024293.2    | 1.75 | 0.81 | 11.51 | 10.7  | 1.71E-09 | 2.79E-08    |
| ILMN_1810628 | KIAA0367  | NM_015225.1    | 2.08 | 1.06 | 13.23 | 12.17 | 1.77E-09 | 2.89E-08    |
| ILMN_1658494 | RGC32     | NM_014059.1    | 2.25 | 1.17 | 9.9   | 8.72  | 1.78E-09 | 0.000000029 |
| ILMN_1729095 | PDZK3     | NM_178140.1    | 3.05 | 1.61 | 9.13  | 7.52  | 1.78E-09 | 0.000000029 |
| ILMN_2081398 | KIF3B     | NM_004798.2    | 1.61 | 0.69 | 12.38 | 11.69 | 1.79E-09 | 2.91E-08    |
| ILMN_1716733 | MYOM2     | NM_003970.1    | 1.85 | 0.89 | 10.65 | 9.77  | 1.8E-09  | 2.92E-08    |
| ILMN_1784217 | SOX15     | NM_006942.1    | 2.50 | 1.32 | 10.49 | 9.17  | 1.81E-09 | 2.93E-08    |
| ILMN_1788149 | NEK11     | NM_024800.2    | 2.07 | 1.05 | 10.62 | 9.57  | 1.84E-09 | 2.98E-08    |
| ILMN_1735548 | HIVEP1    | NM_002114.1    | 2.41 | 1.27 | 10.15 | 8.88  | 1.9E-09  | 3.08E-08    |
| ILMN_1691648 | TRO       | NM_177557.1    | 2.45 | 1.29 | 10.72 | 9.42  | 1.9E-09  | 3.08E-08    |
| ILMN_1749244 | LOC57149  | NM_020424.2    | 1.96 | 0.97 | 13.37 | 12.4  | 1.91E-09 | 3.09E-08    |
| ILMN_1766914 | MFAP4     | NM_002404.1    | 2.53 | 1.34 | 10.94 | 9.6   | 1.94E-09 | 3.13E-08    |
| ILMN_1676728 | EGFL9     | NM_023932.2    | 2.14 | 1.1  | 11    | 9.9   | 1.98E-09 | 3.19E-08    |
| ILMN_1655720 | CNNM4     | NM_020184.2    | 2.69 | 1.43 | 9.75  | 8.32  | 1.99E-09 | 3.21E-08    |
| ILMN_1761684 | WNK2      | NM_006648.3    | 3.97 | 1.99 | 9.47  | 7.48  | 2.01E-09 | 3.24E-08    |
| ILMN_2375002 | MAP4K4    | NM_145687.2    | 1.87 | 0.9  | 13.28 | 12.38 | 2.04E-09 | 3.27E-08    |

Supplementary Table 2

|              |           |                |      |      |       |       |          |             |
|--------------|-----------|----------------|------|------|-------|-------|----------|-------------|
| ILMN_1754921 | FAM43B    | NM_207334.1    | 2.01 | 1.01 | 10.9  | 9.89  | 2.06E-09 | 0.000000033 |
| ILMN_1713454 | ZNF671    | NM_024833.1    | 1.78 | 0.83 | 12.03 | 11.21 | 2.1E-09  | 3.36E-08    |
| ILMN_1694174 | TRIM68    | NM_018073.5    | 1.89 | 0.92 | 11.42 | 10.5  | 2.14E-09 | 3.42E-08    |
| ILMN_2347298 | TSPYL2    | NM_022117.1    | 3.18 | 1.67 | 10.86 | 9.19  | 2.16E-09 | 3.45E-08    |
| ILMN_2328666 | CD83      | NM_004233.3    | 1.95 | 0.96 | 10.19 | 9.23  | 2.2E-09  | 0.000000035 |
| ILMN_1708041 | PLEKHF1   | NM_024310.2    | 2.14 | 1.1  | 10.35 | 9.25  | 2.2E-09  | 0.000000035 |
| ILMN_1675947 | MT3       | NM_005954.2    | 2.30 | 1.2  | 13.67 | 12.47 | 2.2E-09  | 0.000000035 |
| ILMN_1727992 | FEZ1      | NM_022549.2    | 1.77 | 0.82 | 13.5  | 12.67 | 2.29E-09 | 3.63E-08    |
| ILMN_1708009 | LANCL2    | NM_018697.3    | 1.83 | 0.87 | 12.06 | 11.19 | 2.32E-09 | 3.66E-08    |
| ILMN_1682015 | GAL       | NM_015973.2    | 3.05 | 1.61 | 8.72  | 7.11  | 2.34E-09 | 3.69E-08    |
| ILMN_1795228 | ZA20D2    | NM_006007.1    | 1.83 | 0.87 | 14.82 | 13.96 | 2.39E-09 | 3.76E-08    |
| ILMN_2110271 | OLFM2     | NM_058164.1    | 2.66 | 1.41 | 10.28 | 8.87  | 2.42E-09 | 3.81E-08    |
| ILMN_1770850 | PNMA1     | NM_006029.4    | 1.72 | 0.78 | 12.84 | 12.05 | 2.45E-09 | 3.85E-08    |
| ILMN_2120210 | DSCR1L1   | NM_005822.2    | 1.78 | 0.83 | 12.43 | 11.59 | 2.48E-09 | 3.88E-08    |
| ILMN_1761464 | CD74      | NM_001025159.1 | 2.85 | 1.51 | 9.43  | 7.92  | 2.48E-09 | 3.89E-08    |
| ILMN_2292646 | GAD1      | NM_000817.2    | 1.95 | 0.96 | 13.9  | 12.94 | 2.49E-09 | 0.000000039 |
| ILMN_2163819 | KIF21B    | NM_017596.2    | 3.29 | 1.72 | 10.45 | 8.73  | 2.49E-09 | 0.000000039 |
| ILMN_1775734 | SH2D3C    | NM_170600.1    | 2.85 | 1.51 | 8.91  | 7.4   | 2.58E-09 | 4.03E-08    |
| ILMN_1761941 | C4ORF18   | NM_016613.4    | 3.61 | 1.85 | 10.3  | 8.45  | 2.72E-09 | 4.22E-08    |
| ILMN_1779648 | HIST3H2A  | NM_033445.2    | 2.38 | 1.25 | 12.03 | 10.77 | 2.75E-09 | 4.26E-08    |
| ILMN_2195482 | CACNB3    | NM_000725.2    | 1.77 | 0.82 | 12.84 | 12.02 | 2.76E-09 | 4.28E-08    |
| ILMN_1722718 | BMP2      | NM_001200.1    | 2.19 | 1.13 | 10.03 | 8.9   | 2.85E-09 | 4.41E-08    |
| ILMN_1696657 | LRRN5     | NM_006338.2    | 1.87 | 0.9  | 12.71 | 11.8  | 2.85E-09 | 4.41E-08    |
| ILMN_1769140 | KIAA1958  | NM_133465.1    | 2.35 | 1.23 | 10.32 | 9.08  | 2.9E-09  | 4.47E-08    |
| ILMN_2395055 | ATPAF1    | NM_001042546.1 | 1.65 | 0.72 | 11.8  | 11.08 | 2.92E-09 | 0.000000045 |
| ILMN_2186061 | PFKFB3    | NM_004566.2    | 1.92 | 0.94 | 14.39 | 13.45 | 2.93E-09 | 4.52E-08    |
| ILMN_2406410 | RHBDD2    | NM_001040456.1 | 1.68 | 0.75 | 14.15 | 13.4  | 2.99E-09 | 4.59E-08    |
| ILMN_1811702 | GRN       | NM_001012479.1 | 1.73 | 0.79 | 12.36 | 11.57 | 3.04E-09 | 4.66E-08    |
| ILMN_1746673 | 3-SEP     | NM_019106.4    | 2.73 | 1.45 | 14.38 | 12.92 | 3.05E-09 | 4.67E-08    |
| ILMN_1680507 | PPP2R2C   | NM_181876.2    | 1.92 | 0.94 | 8.3   | 7.36  | 3.09E-09 | 4.73E-08    |
| ILMN_1743204 | DUSP8     | NM_004420.1    | 2.10 | 1.07 | 10.23 | 9.16  | 3.13E-09 | 4.78E-08    |
| ILMN_1740842 | SALL2     | NM_005407.1    | 1.78 | 0.83 | 13.42 | 12.58 | 3.19E-09 | 4.87E-08    |
| ILMN_2139761 | DKFZP686A | NM_014988.1    | 2.48 | 1.31 | 12.7  | 11.39 | 3.19E-09 | 4.87E-08    |
| ILMN_1779071 | FEZ1      | NM_005103.3    | 1.79 | 0.84 | 15    | 14.17 | 3.2E-09  | 4.87E-08    |
| ILMN_2331062 | CBFA2T2   | NM_005093.3    | 2.45 | 1.29 | 10.52 | 9.23  | 3.2E-09  | 4.87E-08    |
| ILMN_1808824 | NEBL      | NM_006393.1    | 2.66 | 1.41 | 9.79  | 8.38  | 3.26E-09 | 4.96E-08    |
| ILMN_1770085 | BTG2      | NM_006763.2    | 1.84 | 0.88 | 12.11 | 11.24 | 3.26E-09 | 4.96E-08    |
| ILMN_1795893 | C1ORF119  | NM_020141.3    | 1.79 | 0.84 | 12.41 | 11.57 | 3.28E-09 | 4.98E-08    |
| ILMN_1677765 | LRP8      | NM_033300.2    | 1.64 | 0.71 | 12.07 | 11.36 | 3.33E-09 | 5.04E-08    |
| ILMN_2361807 | OS9       | NM_006812.2    | 1.77 | 0.82 | 10.84 | 10.02 | 3.35E-09 | 5.08E-08    |
| ILMN_1697189 | PNCK      | NM_198452.1    | 2.03 | 1.02 | 10.99 | 9.97  | 3.4E-09  | 5.15E-08    |
| ILMN_1800626 | SESN1     | NM_014454.1    | 1.91 | 0.93 | 11.58 | 10.66 | 3.4E-09  | 5.15E-08    |
| ILMN_1802316 | SMPD3     | NM_018667.2    | 3.86 | 1.95 | 9.96  | 8.01  | 3.46E-09 | 5.23E-08    |

Supplementary Table 2

|              |          |                |      |      |       |       |          |             |
|--------------|----------|----------------|------|------|-------|-------|----------|-------------|
| ILMN_1663986 | MAGI3    | NM_020965.2    | 2.11 | 1.08 | 10.48 | 9.39  | 3.55E-09 | 5.36E-08    |
| ILMN_1792508 | TMEM59   | NM_004872.3    | 1.88 | 0.91 | 14.97 | 14.06 | 3.63E-09 | 5.46E-08    |
| ILMN_2106227 | KIAA2026 | NM_001017969.1 | 2.28 | 1.19 | 11.62 | 10.43 | 3.7E-09  | 5.57E-08    |
| ILMN_1699772 | RRAGD    | NM_021244.2    | 1.96 | 0.97 | 13.62 | 12.65 | 3.71E-09 | 5.57E-08    |
| ILMN_1674038 | CTSD     | NM_001909.3    | 1.79 | 0.84 | 12.48 | 11.64 | 3.71E-09 | 5.57E-08    |
| ILMN_2308338 | BMF      | NM_001003943.1 | 2.43 | 1.28 | 9.04  | 7.75  | 3.76E-09 | 5.65E-08    |
| ILMN_2160764 | HBP1     | NM_012257.3    | 1.67 | 0.74 | 11.7  | 10.96 | 3.77E-09 | 5.65E-08    |
| ILMN_1678191 | GDF10    | NM_004962.2    | 2.99 | 1.58 | 8.93  | 7.35  | 3.81E-09 | 0.000000057 |
| ILMN_1676905 | TIGD7    | NM_033208.2    | 1.65 | 0.72 | 11.2  | 10.49 | 3.82E-09 | 5.72E-08    |
| ILMN_1744118 | ASTN2    | NM_014010.3    | 2.50 | 1.32 | 11.42 | 10.1  | 3.84E-09 | 5.74E-08    |
| ILMN_1652128 | LMBRD1   | NM_018368.2    | 1.95 | 0.96 | 13.2  | 12.24 | 3.84E-09 | 5.74E-08    |
| ILMN_1741688 | CPXM2    | NM_198148.1    | 1.87 | 0.9  | 8.68  | 7.78  | 3.84E-09 | 5.74E-08    |
| ILMN_1711092 | KCNB1    | NM_004975.2    | 2.35 | 1.23 | 8.77  | 7.54  | 3.87E-09 | 5.77E-08    |
| ILMN_2337974 | PKIA     | NM_181839.1    | 1.92 | 0.94 | 13.15 | 12.21 | 3.94E-09 | 5.86E-08    |
| ILMN_1718766 | MT1F     | NM_005949.1    | 2.28 | 1.19 | 13.15 | 11.96 | 3.94E-09 | 5.86E-08    |
| ILMN_1716875 | CTNND2   | NM_001332.2    | 1.72 | 0.78 | 11.46 | 10.68 | 4E-09    | 5.95E-08    |
| ILMN_1810274 | HOXB2    | NM_002145.2    | 2.31 | 1.21 | 8.31  | 7.1   | 4.05E-09 | 6.01E-08    |
| ILMN_1784110 | PCTK3    | NM_212503.1    | 2.31 | 1.21 | 9.06  | 7.86  | 4.12E-09 | 6.11E-08    |
| ILMN_1747577 | ALAD     | NM_001003945.1 | 1.99 | 0.99 | 12.36 | 11.37 | 4.13E-09 | 6.13E-08    |
| ILMN_1778333 | MMP24    | NM_006690.3    | 2.58 | 1.37 | 10.11 | 8.74  | 4.15E-09 | 6.14E-08    |
| ILMN_1682316 | TRIM33   | NM_033020.2    | 1.78 | 0.83 | 12.88 | 12.05 | 4.16E-09 | 6.15E-08    |
| ILMN_1706590 | MLLT1    | NM_005934.2    | 3.01 | 1.59 | 9.92  | 8.33  | 4.17E-09 | 6.16E-08    |
| ILMN_1746578 | SLC23A2  | NM_005116.5    | 1.83 | 0.87 | 11.21 | 10.34 | 4.32E-09 | 6.37E-08    |
| ILMN_2397024 | SPOP     | NM_001007230.1 | 1.66 | 0.73 | 13.72 | 12.99 | 4.35E-09 | 0.000000064 |
| ILMN_1780582 | CD83     | NM_004233.2    | 1.75 | 0.81 | 10.54 | 9.73  | 4.41E-09 | 6.49E-08    |
| ILMN_1765606 | YAF2     | NM_001012424.1 | 2.00 | 1    | 10.81 | 9.8   | 4.42E-09 | 6.49E-08    |
| ILMN_1687315 | RXRA     | NM_002957.3    | 1.64 | 0.71 | 12.21 | 11.51 | 4.6E-09  | 6.72E-08    |
| ILMN_1744003 | SLC44A5  | NM_152697.2    | 2.73 | 1.45 | 10.01 | 8.56  | 4.61E-09 | 6.74E-08    |
| ILMN_1767842 | SLC17A8  | NM_139319.1    | 2.89 | 1.53 | 8.62  | 7.09  | 4.62E-09 | 6.74E-08    |
| ILMN_1735779 | KCNJ8    | NM_004982.2    | 1.74 | 0.8  | 11.48 | 10.68 | 4.67E-09 | 6.81E-08    |
| ILMN_1768812 | FXYD6    | NM_022003.1    | 1.66 | 0.73 | 14.54 | 13.81 | 4.77E-09 | 6.94E-08    |
| ILMN_2225956 | FLJ31659 | NM_153027.1    | 2.06 | 1.04 | 9.23  | 8.2   | 4.82E-09 | 0.00000007  |
| ILMN_1793859 | ALDH2    | NM_000690.2    | 1.69 | 0.76 | 12.86 | 12.1  | 4.83E-09 | 7.01E-08    |
| ILMN_1675939 | IFNGR1   | NM_000416.1    | 1.68 | 0.75 | 12.36 | 11.61 | 4.84E-09 | 7.01E-08    |
| ILMN_2226304 | ANKRD50  | NM_020337.1    | 2.20 | 1.14 | 11.46 | 10.32 | 4.86E-09 | 7.05E-08    |
| ILMN_1717393 | PTCHD1   | NM_173495.1    | 2.03 | 1.02 | 10.23 | 9.21  | 5.02E-09 | 7.25E-08    |
| ILMN_1675927 | NEBL     | NM_213569.1    | 1.92 | 0.94 | 8.39  | 7.45  | 5.03E-09 | 7.27E-08    |
| ILMN_1752012 | KCND3    | NM_004980.3    | 2.62 | 1.39 | 9.74  | 8.36  | 5.09E-09 | 7.33E-08    |
| ILMN_1695061 | KIAA1409 | NM_020818.2    | 3.61 | 1.85 | 9.64  | 7.79  | 5.13E-09 | 7.37E-08    |
| ILMN_2383807 | CALB2    | NM_007088.1    | 3.14 | 1.65 | 9.82  | 8.17  | 5.13E-09 | 7.38E-08    |
| ILMN_1718295 | STAC2    | NM_198993.2    | 2.73 | 1.45 | 9.84  | 8.39  | 5.14E-09 | 7.38E-08    |
| ILMN_1651964 | ABCC5    | NM_001023587.1 | 1.84 | 0.88 | 11.84 | 10.96 | 5.15E-09 | 7.39E-08    |
| ILMN_1674778 | ATP6V1G2 | NM_130463.2    | 2.01 | 1.01 | 11    | 9.99  | 5.17E-09 | 7.42E-08    |

Supplementary Table 2

|              |          |                |      |      |       |       |          |             |
|--------------|----------|----------------|------|------|-------|-------|----------|-------------|
| ILMN_1740319 | FAM14A   | NM_032036.2    | 1.78 | 0.83 | 11.34 | 10.51 | 5.18E-09 | 7.42E-08    |
| ILMN_2155816 | DIRAS2   | NM_017594.3    | 2.79 | 1.48 | 9.18  | 7.71  | 5.19E-09 | 7.44E-08    |
| ILMN_1813430 | RNF36    | NM_080745.2    | 2.23 | 1.16 | 9.94  | 8.79  | 5.23E-09 | 7.49E-08    |
| ILMN_1668863 | LYPD1    | NM_144586.3    | 1.85 | 0.89 | 11.3  | 10.41 | 5.32E-09 | 0.000000076 |
| ILMN_1814315 | PBXIP1   | NM_020524.2    | 2.01 | 1.01 | 10.1  | 9.09  | 5.32E-09 | 0.000000076 |
| ILMN_2415235 | CSNK1E   | NM_152221.2    | 1.72 | 0.78 | 14.57 | 13.79 | 5.37E-09 | 7.65E-08    |
| ILMN_1720829 | ZFP36    | NM_003407.1    | 1.92 | 0.94 | 11.36 | 10.42 | 5.39E-09 | 7.68E-08    |
| ILMN_2337856 | KCND3    | NM_172198.1    | 1.87 | 0.9  | 9.06  | 8.16  | 5.4E-09  | 7.69E-08    |
| ILMN_1724139 | TMEM123  | NM_052932.1    | 1.72 | 0.78 | 14.43 | 13.64 | 5.43E-09 | 7.73E-08    |
| ILMN_1789244 | SOX8     | NM_014587.2    | 1.74 | 0.8  | 14.56 | 13.76 | 5.45E-09 | 7.75E-08    |
| ILMN_2199313 | NPDC1    | NM_015392.2    | 2.00 | 1    | 11.85 | 10.85 | 5.45E-09 | 7.75E-08    |
| ILMN_1805842 | FHL1     | NM_001449.3    | 1.64 | 0.71 | 12.95 | 12.23 | 5.46E-09 | 7.76E-08    |
| ILMN_1745223 | CDC42EP4 | NM_012121.4    | 2.01 | 1.01 | 14.96 | 13.95 | 5.49E-09 | 7.79E-08    |
| ILMN_1748983 | RTN4     | NM_007008.2    | 2.38 | 1.25 | 9.68  | 8.43  | 5.49E-09 | 7.79E-08    |
| ILMN_1802611 | SPEN     | NM_015001.2    | 2.03 | 1.02 | 12.77 | 11.75 | 5.53E-09 | 7.84E-08    |
| ILMN_1801146 | MMP17    | NM_016155.3    | 2.55 | 1.35 | 8.77  | 7.42  | 5.54E-09 | 7.85E-08    |
| ILMN_2358134 | ADAMTS14 | NM_139155.2    | 2.99 | 1.58 | 9.61  | 8.03  | 5.61E-09 | 7.94E-08    |
| ILMN_1791593 | MGC24039 | NM_144973.2    | 1.73 | 0.79 | 13.13 | 12.34 | 5.66E-09 | 0.00000008  |
| ILMN_1741356 | PRICKLE1 | NM_153026.1    | 2.20 | 1.14 | 10.91 | 9.78  | 5.7E-09  | 8.06E-08    |
| ILMN_1707695 | IFIT1    | NM_001548.2    | 1.96 | 0.97 | 10.62 | 9.65  | 5.75E-09 | 8.11E-08    |
| ILMN_2396198 | APLP1    | NM_005166.3    | 2.50 | 1.32 | 10.45 | 9.13  | 5.75E-09 | 8.11E-08    |
| ILMN_2399036 | SEPN1    | NM_020451.2    | 1.84 | 0.88 | 12.2  | 11.31 | 5.81E-09 | 8.19E-08    |
| ILMN_1813503 | SEMA6C   | NM_030913.3    | 2.23 | 1.16 | 10.72 | 9.56  | 5.85E-09 | 8.23E-08    |
| ILMN_1762972 | CHD9     | NM_025134.3    | 2.10 | 1.07 | 13    | 11.93 | 5.87E-09 | 8.25E-08    |
| ILMN_1737211 | ZNF585A  | NM_199126.1    | 1.88 | 0.91 | 10.63 | 9.73  | 5.9E-09  | 8.29E-08    |
| ILMN_2234187 | CDO1     | NM_001801.2    | 3.01 | 1.59 | 12.33 | 10.74 | 5.97E-09 | 8.37E-08    |
| ILMN_2380938 | SYT7     | NM_004200.2    | 2.87 | 1.52 | 9.63  | 8.11  | 6.02E-09 | 8.44E-08    |
| ILMN_2235679 | ARHGEF7  | NM_145735.1    | 3.29 | 1.72 | 9.38  | 7.66  | 6.03E-09 | 8.45E-08    |
| ILMN_1659845 | KIAA0355 | NM_014686.2    | 1.75 | 0.81 | 12.55 | 11.74 | 6.09E-09 | 8.52E-08    |
| ILMN_1808011 | FAM46B   | NM_052943.2    | 1.89 | 0.92 | 11.18 | 10.26 | 6.09E-09 | 8.52E-08    |
| ILMN_2363744 | PACRG    | NM_001080379.1 | 2.55 | 1.35 | 10.29 | 8.94  | 6.11E-09 | 8.54E-08    |
| ILMN_2089977 | FKBP9L   | NM_182827.1    | 1.75 | 0.81 | 13.11 | 12.3  | 6.17E-09 | 8.62E-08    |
| ILMN_1653042 | HSD3B7   | NM_025193.2    | 2.33 | 1.22 | 9.4   | 8.18  | 6.22E-09 | 8.68E-08    |
| ILMN_1694466 | ZBED1    | NM_004729.3    | 1.68 | 0.75 | 13.43 | 12.67 | 6.28E-09 | 8.76E-08    |
| ILMN_1683211 | CSPG3    | NM_004386.1    | 2.35 | 1.23 | 14.1  | 12.87 | 6.4E-09  | 8.91E-08    |
| ILMN_1712684 | FAM20C   | NM_020223.1    | 2.04 | 1.03 | 12.55 | 11.52 | 6.45E-09 | 8.97E-08    |
| ILMN_2361643 | RRAGB    | NM_006064.3    | 1.95 | 0.96 | 10.86 | 9.9   | 6.46E-09 | 8.98E-08    |
| ILMN_2078975 | GRM3     | NM_000840.2    | 2.10 | 1.07 | 8.48  | 7.42  | 6.59E-09 | 9.16E-08    |
| ILMN_2384807 | LRRCC1   | NM_033402.2    | 1.84 | 0.88 | 11.89 | 11.01 | 6.64E-09 | 9.21E-08    |
| ILMN_1701653 | ASCL1    | NM_004316.2    | 1.61 | 0.69 | 14.01 | 13.33 | 6.65E-09 | 9.22E-08    |
| ILMN_1676649 | AQP4     | NM_001650.4    | 2.30 | 1.2  | 11.8  | 10.6  | 6.66E-09 | 9.22E-08    |
| ILMN_1687546 | HSP90AA1 | NM_001017963.1 | 2.16 | 1.11 | 9.85  | 8.73  | 6.67E-09 | 9.23E-08    |
| ILMN_2360415 | PRNP     | NM_183079.2    | 1.61 | 0.69 | 13.96 | 13.27 | 6.7E-09  | 9.26E-08    |

Supplementary Table 2

|              |           |                |      |      |       |       |          |             |
|--------------|-----------|----------------|------|------|-------|-------|----------|-------------|
| ILMN_1785635 | BRD3      | NM_007371.2    | 2.01 | 1.01 | 13.02 | 12.01 | 6.73E-09 | 0.000000093 |
| ILMN_2379644 | CD74      | NM_004355.2    | 3.43 | 1.78 | 10.75 | 8.98  | 6.76E-09 | 9.33E-08    |
| ILMN_2163070 | C6ORF148  | NM_030568.3    | 2.06 | 1.04 | 10.03 | 8.99  | 6.77E-09 | 9.34E-08    |
| ILMN_1771987 | SLC44A2   | NM_020428.2    | 1.80 | 0.85 | 14.05 | 13.2  | 6.81E-09 | 9.39E-08    |
| ILMN_1720606 | LRCH2     | NM_020871.2    | 1.87 | 0.9  | 11.54 | 10.64 | 6.97E-09 | 0.000000096 |
| ILMN_1710209 | FLJ20160  | NM_017694.2    | 2.36 | 1.24 | 10.11 | 8.87  | 6.99E-09 | 9.62E-08    |
| ILMN_2339748 | RNF13     | NM_183381.1    | 1.79 | 0.84 | 12    | 11.16 | 7.1E-09  | 9.77E-08    |
| ILMN_1669382 | CPLX2     | NM_006650.3    | 3.56 | 1.83 | 9.48  | 7.66  | 7.28E-09 | 9.96E-08    |
| ILMN_1756999 | RBL2      | NM_005611.2    | 1.82 | 0.86 | 12.19 | 11.33 | 7.28E-09 | 9.96E-08    |
| ILMN_1719695 | NFKBIZ    | NM_001005474.1 | 1.88 | 0.91 | 11.59 | 10.68 | 7.39E-09 | 0.000000101 |
| ILMN_2259633 | MLL5      | NM_182931.2    | 1.77 | 0.82 | 11.49 | 10.67 | 7.48E-09 | 0.000000102 |
| ILMN_1814573 | FLJ11171  | NM_018348.4    | 1.99 | 0.99 | 11.64 | 10.66 | 7.49E-09 | 0.000000102 |
| ILMN_2131293 | LOC200810 | NM_001015050.1 | 2.27 | 1.18 | 9.2   | 8.02  | 7.5E-09  | 0.000000102 |
| ILMN_2390974 | DNAJB2    | NM_006736.5    | 1.55 | 0.63 | 13.68 | 13.04 | 7.53E-09 | 0.000000103 |
| ILMN_2062271 | CDK5R1    | NM_003885.2    | 3.71 | 1.89 | 10.27 | 8.38  | 7.62E-09 | 0.000000104 |
| ILMN_2050023 | CCDC23    | NM_199342.1    | 2.00 | 1    | 13.46 | 12.46 | 7.67E-09 | 0.000000104 |
| ILMN_1765208 | GLUL      | NM_001033056.1 | 2.33 | 1.22 | 9.6   | 8.38  | 8E-09    | 0.000000108 |
| ILMN_1759563 | NRIP3     | NM_020645.1    | 1.80 | 0.85 | 10.72 | 9.87  | 8.06E-09 | 0.000000109 |
| ILMN_1712023 | SLC8A3    | NM_183002.1    | 2.30 | 1.2  | 8.55  | 7.36  | 8.1E-09  | 0.00000011  |
| ILMN_1708983 | CASC1     | NM_018272.2    | 2.48 | 1.31 | 9.36  | 8.04  | 8.11E-09 | 0.00000011  |
| ILMN_1695382 | TSC22D3   | NM_001015881.1 | 2.48 | 1.31 | 8.76  | 7.45  | 8.31E-09 | 0.000000112 |
| ILMN_1676528 | BTN3A2    | NM_007047.3    | 2.00 | 1    | 9.99  | 8.99  | 8.42E-09 | 0.000000114 |
| ILMN_1672004 | TOB1      | NM_005749.2    | 1.91 | 0.93 | 12.05 | 11.12 | 8.48E-09 | 0.000000114 |
| ILMN_1717934 | SYT11     | NM_152280.2    | 1.62 | 0.7  | 15.76 | 15.07 | 8.52E-09 | 0.000000115 |
| ILMN_1695311 | HLA-DMA   | NM_006120.2    | 2.62 | 1.39 | 11.41 | 10.02 | 8.69E-09 | 0.000000117 |
| ILMN_1729749 | HERC5     | NM_016323.1    | 2.28 | 1.19 | 9.25  | 8.07  | 8.7E-09  | 0.000000117 |
| ILMN_2344182 | TMTC4     | NM_032813.1    | 2.45 | 1.29 | 11.45 | 10.16 | 8.7E-09  | 0.000000117 |
| ILMN_1669516 | ZNF193    | NM_006299.2    | 1.78 | 0.83 | 11.72 | 10.88 | 8.74E-09 | 0.000000117 |
| ILMN_1686748 | TMEM9     | NM_016456.2    | 1.67 | 0.74 | 12.48 | 11.74 | 8.91E-09 | 0.000000119 |
| ILMN_1762294 | TSRC1     | NM_025008.2    | 2.08 | 1.06 | 8.46  | 7.41  | 8.97E-09 | 0.00000012  |
| ILMN_1734380 | DPF3      | NM_012074.1    | 1.71 | 0.77 | 11.33 | 10.56 | 9.1E-09  | 0.000000122 |
| ILMN_1735463 | FLJ20433  | NM_017820.2    | 2.17 | 1.12 | 9.39  | 8.27  | 9.13E-09 | 0.000000122 |
| ILMN_1703565 | GLTSCR2   | NM_015710.3    | 1.62 | 0.7  | 14.71 | 14.01 | 9.19E-09 | 0.000000123 |
| ILMN_1724145 | CBX4      | NM_003655.2    | 1.83 | 0.87 | 11.34 | 10.47 | 9.21E-09 | 0.000000123 |
| ILMN_1718896 | CNTN2     | NM_005076.2    | 2.91 | 1.54 | 9.75  | 8.21  | 9.41E-09 | 0.000000125 |
| ILMN_1676946 | AP3M2     | NM_006803.2    | 1.73 | 0.79 | 12.54 | 11.75 | 9.44E-09 | 0.000000126 |
| ILMN_2352574 | ZNF274    | NM_016324.2    | 1.69 | 0.76 | 10.56 | 9.8   | 9.5E-09  | 0.000000126 |
| ILMN_1733746 | REEP1     | NM_022912.1    | 1.66 | 0.73 | 12.54 | 11.81 | 9.53E-09 | 0.000000126 |
| ILMN_1731640 | MGC39900  | XM_936687.1    | 2.23 | 1.16 | 13.77 | 12.61 | 9.59E-09 | 0.000000127 |
| ILMN_2072541 | RAB11FIP2 | NM_014904.1    | 1.58 | 0.66 | 11.24 | 10.59 | 9.79E-09 | 0.00000013  |
| ILMN_1789596 | ETV6      | NM_001987.3    | 1.67 | 0.74 | 11.45 | 10.71 | 9.86E-09 | 0.00000013  |
| ILMN_1742358 | CA14      | NM_012113.1    | 1.56 | 0.64 | 11.67 | 11.04 | 9.87E-09 | 0.00000013  |
| ILMN_1707553 | FAM59A    | NM_022751.1    | 1.96 | 0.97 | 9.71  | 8.74  | 9.96E-09 | 0.000000131 |

Supplementary Table 2

|              |          |                |      |      |       |       |          |             |
|--------------|----------|----------------|------|------|-------|-------|----------|-------------|
| ILMN_1715647 | VANGL2   | NM_020335.1    | 1.92 | 0.94 | 13.17 | 12.23 | 9.98E-09 | 0.000000132 |
| ILMN_1807455 | DHRS7    | NM_016029.1    | 1.54 | 0.62 | 13.46 | 12.84 | 1.01E-08 | 0.000000133 |
| ILMN_1756417 | ANKRD37  | NM_181726.1    | 1.82 | 0.86 | 10.44 | 9.58  | 1.01E-08 | 0.000000133 |
| ILMN_1736901 | ZDHHC23  | NM_173570.2    | 2.45 | 1.29 | 9.38  | 8.09  | 1.02E-08 | 0.000000134 |
| ILMN_2133675 | SGSH     | NM_000199.2    | 1.72 | 0.78 | 12.98 | 12.2  | 1.03E-08 | 0.000000135 |
| ILMN_1762095 | TMTC4    | NM_032813.1    | 1.97 | 0.98 | 11.51 | 10.54 | 1.05E-08 | 0.000000137 |
| ILMN_1808500 | CEP68    | NM_015147.1    | 1.75 | 0.81 | 11.31 | 10.5  | 1.06E-08 | 0.000000138 |
| ILMN_1812031 | PALM     | NM_002579.1    | 1.75 | 0.81 | 13.68 | 12.88 | 1.06E-08 | 0.000000138 |
| ILMN_1745887 | FBXO21   | NM_015002.2    | 1.54 | 0.62 | 13.86 | 13.24 | 1.07E-08 | 0.00000014  |
| ILMN_2043265 | ZFP106   | NM_022473.1    | 1.92 | 0.94 | 13.48 | 12.54 | 1.08E-08 | 0.00000014  |
| ILMN_1689774 | MRFAP1L1 | NM_152301.3    | 1.52 | 0.6  | 14.07 | 13.47 | 1.08E-08 | 0.000000141 |
| ILMN_1687751 | BAALC    | NM_001024372.1 | 1.61 | 0.69 | 14.35 | 13.67 | 1.08E-08 | 0.000000141 |
| ILMN_1731062 | NPY      | NM_000905.2    | 1.72 | 0.78 | 14.75 | 13.96 | 1.09E-08 | 0.000000141 |
| ILMN_1755383 | LRRC1    | NM_018214.3    | 1.74 | 0.8  | 11.2  | 10.4  | 1.09E-08 | 0.000000142 |
| ILMN_1674817 | C1ORF115 | NM_024709.2    | 2.14 | 1.1  | 9.67  | 8.56  | 1.11E-08 | 0.000000144 |
| ILMN_1654566 | HSPA1L   | NM_005527.2    | 1.74 | 0.8  | 10.54 | 9.74  | 1.11E-08 | 0.000000144 |
| ILMN_1682928 | CPVL     | NM_031311.2    | 1.80 | 0.85 | 11.93 | 11.07 | 1.12E-08 | 0.000000145 |
| ILMN_2111229 | BZRAP1   | NM_004758.1    | 2.50 | 1.32 | 9.21  | 7.89  | 1.12E-08 | 0.000000145 |
| ILMN_1780444 | ARL3     | NM_004311.2    | 1.72 | 0.78 | 12.19 | 11.41 | 1.13E-08 | 0.000000147 |
| ILMN_2189222 | KLHL8    | NM_020803.3    | 1.69 | 0.76 | 11.85 | 11.08 | 1.14E-08 | 0.000000148 |
| ILMN_1748812 | TMEM130  | NM_152913.1    | 2.20 | 1.14 | 8.6   | 7.46  | 1.15E-08 | 0.000000148 |
| ILMN_1684554 | COL16A1  | NM_001856.2    | 2.20 | 1.14 | 10.33 | 9.18  | 1.15E-08 | 0.000000149 |
| ILMN_1694810 | PANX2    | NM_052839.2    | 1.84 | 0.88 | 10.52 | 9.65  | 1.15E-08 | 0.000000149 |
| ILMN_2334760 | ARMCX3   | NM_177947.2    | 1.77 | 0.82 | 12.27 | 11.45 | 1.16E-08 | 0.000000149 |
| ILMN_2094294 | NR2E1    | NM_003269.2    | 2.77 | 1.47 | 11.22 | 9.75  | 1.16E-08 | 0.00000015  |
| ILMN_1720595 | MDGA1    | NM_153487.2    | 1.80 | 0.85 | 10.96 | 10.11 | 1.17E-08 | 0.000000151 |
| ILMN_2094875 | ABCB1    | NM_000927.3    | 3.05 | 1.61 | 10.53 | 8.92  | 1.21E-08 | 0.000000156 |
| ILMN_2228938 | ECM2     | NM_001393.2    | 3.10 | 1.63 | 9.94  | 8.3   | 1.21E-08 | 0.000000156 |
| ILMN_1660995 | AMH      | NM_000479.2    | 2.48 | 1.31 | 9.79  | 8.48  | 1.22E-08 | 0.000000156 |
| ILMN_1681846 | ZNF540   | NM_152606.2    | 2.27 | 1.18 | 8.9   | 7.71  | 1.22E-08 | 0.000000156 |
| ILMN_2148459 | B2M      | NM_004048.2    | 2.04 | 1.03 | 14.37 | 13.34 | 1.22E-08 | 0.000000157 |
| ILMN_1710522 | RUNX1T1  | NM_175635.1    | 2.87 | 1.52 | 9.47  | 7.95  | 1.22E-08 | 0.000000157 |
| ILMN_2403237 | CHN2     | NM_004067.1    | 1.69 | 0.76 | 10.36 | 9.6   | 1.23E-08 | 0.000000158 |
| ILMN_1742578 | MKLN1    | NM_013255.3    | 1.72 | 0.78 | 12.82 | 12.05 | 1.25E-08 | 0.00000016  |
| ILMN_2118663 | ERV3     | NM_001007253.1 | 2.43 | 1.28 | 9.65  | 8.37  | 1.26E-08 | 0.000000161 |
| ILMN_2111237 | MN1      | NM_002430.2    | 2.93 | 1.55 | 10.56 | 9.02  | 1.28E-08 | 0.000000163 |
| ILMN_1770548 | CLASP2   | NM_015097.1    | 2.35 | 1.23 | 12.17 | 10.94 | 1.32E-08 | 0.000000168 |
| ILMN_2087629 | NOL4     | NM_003787.1    | 2.69 | 1.43 | 10.7  | 9.27  | 1.32E-08 | 0.000000169 |
| ILMN_1729180 | GATM     | NM_001482.1    | 1.66 | 0.73 | 11.47 | 10.74 | 1.33E-08 | 0.000000169 |
| ILMN_1723480 | BST2     | NM_004335.2    | 2.36 | 1.24 | 10.02 | 8.78  | 1.35E-08 | 0.000000172 |
| ILMN_1704164 | ATP13A2  | NM_022089.1    | 1.78 | 0.83 | 10.65 | 9.82  | 1.37E-08 | 0.000000173 |
| ILMN_1773117 | BCOR     | NM_017745.4    | 2.58 | 1.37 | 11.49 | 10.12 | 1.37E-08 | 0.000000174 |
| ILMN_2372398 | ALDH5A1  | NM_001080.3    | 2.30 | 1.2  | 11.66 | 10.47 | 1.38E-08 | 0.000000174 |

Supplementary Table 2

|              |           |                |      |      |       |       |          |             |
|--------------|-----------|----------------|------|------|-------|-------|----------|-------------|
| ILMN_1660864 | RHBDL1    | NM_003961.1    | 2.38 | 1.25 | 9.96  | 8.71  | 1.39E-08 | 0.000000176 |
| ILMN_1735155 | GLB1      | NM_000404.1    | 1.53 | 0.61 | 13.21 | 12.61 | 1.39E-08 | 0.000000176 |
| ILMN_2187533 | FAM130A1  | NM_030809.1    | 1.61 | 0.69 | 11.84 | 11.15 | 1.4E-08  | 0.000000177 |
| ILMN_1743456 | ZCCHC14   | NM_015144.1    | 1.80 | 0.85 | 12.35 | 11.49 | 1.44E-08 | 0.000000181 |
| ILMN_1713807 | MAN1C1    | NM_020379.1    | 2.00 | 1    | 13.59 | 12.59 | 1.45E-08 | 0.000000182 |
| ILMN_2411282 | QSCN6     | NM_001004128.2 | 1.75 | 0.81 | 11.75 | 10.94 | 1.47E-08 | 0.000000184 |
| ILMN_1806782 | ZNF235    | NM_004234.3    | 2.07 | 1.05 | 10.26 | 9.21  | 1.47E-08 | 0.000000185 |
| ILMN_1666493 | CCR10     | NM_016602.1    | 1.89 | 0.92 | 8.7   | 7.78  | 1.5E-08  | 0.000000188 |
| ILMN_1725644 | UBE2D2    | NM_003339.2    | 1.65 | 0.72 | 11.6  | 10.87 | 1.5E-08  | 0.000000188 |
| ILMN_1742547 | NRP1      | NM_001024629.1 | 1.58 | 0.66 | 11    | 10.34 | 1.51E-08 | 0.000000189 |
| ILMN_1772261 | GLG1      | NM_012201.4    | 1.85 | 0.89 | 14.43 | 13.54 | 1.52E-08 | 0.00000019  |
| ILMN_2229214 | STOX1     | NM_152709.3    | 3.23 | 1.69 | 10.24 | 8.56  | 1.52E-08 | 0.00000019  |
| ILMN_1788251 | SNN       | NM_003498.3    | 1.97 | 0.98 | 11.32 | 10.34 | 1.53E-08 | 0.000000191 |
| ILMN_1681984 | GALNT10   | NM_198321.2    | 2.27 | 1.18 | 11.5  | 10.32 | 1.54E-08 | 0.000000192 |
| ILMN_2230862 | GYG1      | NM_004130.2    | 1.58 | 0.66 | 13.19 | 12.53 | 1.56E-08 | 0.000000194 |
| ILMN_1807540 | CBARA1    | NM_006077.1    | 1.72 | 0.78 | 12.18 | 11.4  | 1.57E-08 | 0.000000195 |
| ILMN_1697153 | ZDHHC17   | NM_015336.1    | 1.87 | 0.9  | 11.76 | 10.87 | 1.57E-08 | 0.000000195 |
| ILMN_2350122 | TRIM13    | NM_001007278.1 | 1.95 | 0.96 | 11.05 | 10.09 | 1.58E-08 | 0.000000196 |
| ILMN_1773307 | NAP1L5    | NM_153757.1    | 1.62 | 0.7  | 11.03 | 10.33 | 1.58E-08 | 0.000000196 |
| ILMN_1796063 | TRIM44    | NM_017583.3    | 1.69 | 0.76 | 12.94 | 12.18 | 1.6E-08  | 0.000000198 |
| ILMN_1697491 | FLJ14213  | NM_024841.2    | 1.96 | 0.97 | 10.87 | 9.91  | 1.61E-08 | 0.000000199 |
| ILMN_1728256 | SPAG9     | NM_172345.1    | 1.89 | 0.92 | 12.17 | 11.24 | 1.64E-08 | 0.000000203 |
| ILMN_2353129 | EYA2      | NM_005244.3    | 2.69 | 1.43 | 9.63  | 8.19  | 1.66E-08 | 0.000000205 |
| ILMN_1762103 | WDR48     | NM_020839.2    | 1.72 | 0.78 | 13.01 | 12.23 | 1.68E-08 | 0.000000207 |
| ILMN_1779182 | TMEM98    | NM_015544.2    | 1.55 | 0.63 | 13.97 | 13.34 | 1.68E-08 | 0.000000207 |
| ILMN_2305225 | NDRG4     | NM_022910.1    | 1.69 | 0.76 | 14.56 | 13.8  | 1.7E-08  | 0.000000209 |
| ILMN_1700915 | PCGF4     | NM_005180.5    | 1.68 | 0.75 | 12.85 | 12.1  | 1.7E-08  | 0.000000209 |
| ILMN_1660193 | ZNF529    | NM_020951.1    | 1.72 | 0.78 | 11.14 | 10.36 | 1.71E-08 | 0.00000021  |
| ILMN_2368068 | TCF20     | NM_181492.1    | 1.56 | 0.64 | 11.79 | 11.14 | 1.71E-08 | 0.00000021  |
| ILMN_1681737 | TMSL8     | NM_021992.2    | 2.50 | 1.32 | 14.62 | 13.3  | 1.71E-08 | 0.00000021  |
| ILMN_2189027 | LIPG      | NM_006033.2    | 1.73 | 0.79 | 13.03 | 12.24 | 1.72E-08 | 0.000000211 |
| ILMN_1737283 | MGC39900  | NM_194324.1    | 2.19 | 1.13 | 13.75 | 12.62 | 1.74E-08 | 0.000000213 |
| ILMN_1791483 | PDE4D     | NM_006203.3    | 2.10 | 1.07 | 10.75 | 9.68  | 1.74E-08 | 0.000000214 |
| ILMN_1768480 | VGLL4     | NM_014667.1    | 1.54 | 0.62 | 13.79 | 13.17 | 1.77E-08 | 0.000000216 |
| ILMN_2158705 | ACYP2     | NM_138448.2    | 1.97 | 0.98 | 12.19 | 11.21 | 1.78E-08 | 0.000000217 |
| ILMN_1741440 | SLC35A1   | NM_006416.2    | 1.83 | 0.87 | 11.83 | 10.96 | 1.78E-08 | 0.000000218 |
| ILMN_2387214 | PALM      | NM_002579.2    | 1.92 | 0.94 | 11.79 | 10.86 | 1.79E-08 | 0.000000218 |
| ILMN_1692191 | LOC653133 | XM_926881.1    | 2.11 | 1.08 | 12.4  | 11.32 | 1.79E-08 | 0.000000218 |
| ILMN_1785202 | STAT4     | NM_003151.2    | 2.23 | 1.16 | 8.71  | 7.55  | 1.79E-08 | 0.000000219 |
| ILMN_1812096 | IGSF4C    | NM_145296.1    | 1.80 | 0.85 | 12.77 | 11.92 | 1.8E-08  | 0.000000219 |
| ILMN_1749077 | RIC3      | NM_024557.2    | 2.30 | 1.2  | 9.52  | 8.32  | 1.82E-08 | 0.000000222 |
| ILMN_1752579 | ATP6V0A1  | NM_005177.2    | 1.77 | 0.82 | 13.27 | 12.44 | 1.84E-08 | 0.000000223 |
| ILMN_1667319 | LPPR2     | NM_022737.1    | 1.58 | 0.66 | 11.35 | 10.7  | 1.86E-08 | 0.000000226 |

Supplementary Table 2

|              |           |                |      |      |       |       |          |             |
|--------------|-----------|----------------|------|------|-------|-------|----------|-------------|
| ILMN_1715789 | DOCK1     | NM_001380.2    | 1.95 | 0.96 | 11.62 | 10.66 | 1.87E-08 | 0.000000226 |
| ILMN_1722673 | PCDHB4    | NM_018938.2    | 2.69 | 1.43 | 9.88  | 8.45  | 1.87E-08 | 0.000000227 |
| ILMN_1718712 | C20ORF177 | NM_022106.1    | 1.73 | 0.79 | 12.6  | 11.81 | 1.92E-08 | 0.000000232 |
| ILMN_2234412 | TLE3      | NM_005078.1    | 2.71 | 1.44 | 9.19  | 7.75  | 1.94E-08 | 0.000000235 |
| ILMN_1673370 | FBXL5     | NM_012161.2    | 1.59 | 0.67 | 10.89 | 10.22 | 1.95E-08 | 0.000000236 |
| ILMN_1764827 | MRFAP1L1  | NM_152301.3    | 1.71 | 0.77 | 10.17 | 9.41  | 1.96E-08 | 0.000000236 |
| ILMN_1809437 | RHBDD2    | NM_020684.2    | 1.57 | 0.65 | 14.22 | 13.57 | 1.98E-08 | 0.000000239 |
| ILMN_1758924 | LRFN2     | NM_020737.1    | 2.43 | 1.28 | 8.48  | 7.2   | 1.99E-08 | 0.00000024  |
| ILMN_1687501 | MOXD1     | NM_015529.1    | 1.74 | 0.8  | 14.67 | 13.87 | 2.02E-08 | 0.000000243 |
| ILMN_1777519 | ITGB7     | NM_000889.1    | 2.36 | 1.24 | 8.46  | 7.22  | 2.03E-08 | 0.000000244 |
| ILMN_2341548 | MYO5B     | NM_001080467.1 | 2.99 | 1.58 | 10.43 | 8.85  | 2.06E-08 | 0.000000247 |
| ILMN_2411864 | PHACTR3   | NM_183246.1    | 2.22 | 1.15 | 8.61  | 7.46  | 2.1E-08  | 0.000000252 |
| ILMN_1790352 | PIGZ      | NM_025163.2    | 2.01 | 1.01 | 9.61  | 8.6   | 2.11E-08 | 0.000000253 |
| ILMN_2354478 | CYFIP2    | NM_001037333.1 | 1.72 | 0.78 | 12.35 | 11.57 | 2.12E-08 | 0.000000254 |
| ILMN_1802053 | ZNF91     | NM_003430.1    | 4.47 | 2.16 | 12.44 | 10.28 | 2.13E-08 | 0.000000255 |
| ILMN_2161556 | C12ORF49  | NM_024738.1    | 1.67 | 0.74 | 11.15 | 10.4  | 2.15E-08 | 0.000000258 |
| ILMN_1765523 | TOLLIP    | NM_019009.2    | 1.79 | 0.84 | 11.12 | 10.28 | 2.17E-08 | 0.000000259 |
| ILMN_1653711 | FZD2      | NM_001466.2    | 1.61 | 0.69 | 12.51 | 11.81 | 2.2E-08  | 0.000000262 |
| ILMN_1760890 | SEPN1     | NM_206926.1    | 2.13 | 1.09 | 14.39 | 13.3  | 2.2E-08  | 0.000000262 |
| ILMN_1676998 | SCN2B     | NM_004588.3    | 2.73 | 1.45 | 10.06 | 8.61  | 2.21E-08 | 0.000000263 |
| ILMN_1762766 | PTPRA     | NM_080841.2    | 1.59 | 0.67 | 12.5  | 11.83 | 2.21E-08 | 0.000000263 |
| ILMN_2076940 | C1ORF149  | NM_022756.3    | 1.61 | 0.69 | 11.22 | 10.54 | 2.26E-08 | 0.000000268 |
| ILMN_1738075 | CMIP      | NM_030629.1    | 1.62 | 0.7  | 13.5  | 12.8  | 2.27E-08 | 0.00000027  |
| ILMN_1730794 | SERTAD4   | NM_019605.2    | 2.38 | 1.25 | 9.25  | 8     | 2.28E-08 | 0.000000271 |
| ILMN_1702789 | KNDC1     | NM_152643.5    | 2.08 | 1.06 | 8.76  | 7.7   | 2.3E-08  | 0.000000273 |
| ILMN_1694426 | ROR2      | NM_004560.2    | 1.87 | 0.9  | 8.4   | 7.49  | 2.35E-08 | 0.000000278 |
| ILMN_2264625 | NIPBL     | NM_133433.2    | 1.68 | 0.75 | 11.53 | 10.78 | 2.37E-08 | 0.00000028  |
| ILMN_1693242 | ZNF342    | NM_145288.1    | 1.67 | 0.74 | 8.96  | 8.22  | 2.42E-08 | 0.000000285 |
| ILMN_1676241 | BCOR      | NM_020926.2    | 1.96 | 0.97 | 8.78  | 7.81  | 2.42E-08 | 0.000000286 |
| ILMN_1768505 | IL13RA1   | NM_001560.2    | 1.74 | 0.8  | 12.35 | 11.55 | 2.43E-08 | 0.000000286 |
| ILMN_1757230 | ZNF250    | NM_021061.1    | 1.72 | 0.78 | 10.97 | 10.19 | 2.43E-08 | 0.000000287 |
| ILMN_1717477 | PSD3      | NM_206909.1    | 2.13 | 1.09 | 12.33 | 11.25 | 2.5E-08  | 0.000000293 |
| ILMN_1761093 | B3GAT1    | NM_054025.1    | 1.93 | 0.95 | 12.93 | 11.97 | 2.57E-08 | 0.000000301 |
| ILMN_1739885 | SLC41A3   | NM_001008485.1 | 1.82 | 0.86 | 12.57 | 11.71 | 2.58E-08 | 0.000000302 |
| ILMN_1758497 | TTYH1     | NM_020659.2    | 1.61 | 0.69 | 14.52 | 13.83 | 2.6E-08  | 0.000000304 |
| ILMN_2359601 | CAMK2G    | NM_172172.1    | 1.73 | 0.79 | 10.68 | 9.89  | 2.62E-08 | 0.000000306 |
| ILMN_1810335 | DGKB      | NM_004080.1    | 2.83 | 1.5  | 9.14  | 7.63  | 2.65E-08 | 0.000000309 |
| ILMN_1745116 | C20ORF22  | NM_015600.2    | 1.58 | 0.66 | 11.27 | 10.61 | 2.69E-08 | 0.000000313 |
| ILMN_1774427 | CALCOCO1  | NM_020898.1    | 2.04 | 1.03 | 10.53 | 9.49  | 2.81E-08 | 0.000000326 |
| ILMN_2340052 | NCOR2     | NM_006312.3    | 1.93 | 0.95 | 13.37 | 12.42 | 2.82E-08 | 0.000000327 |
| ILMN_1670926 | GALNAC4S- | NM_015892.2    | 1.99 | 0.99 | 11.96 | 10.97 | 2.88E-08 | 0.000000333 |
| ILMN_1672834 | SSH2      | NM_033389.2    | 1.88 | 0.91 | 11.1  | 10.2  | 2.91E-08 | 0.000000336 |
| ILMN_1802380 | RERE      | NM_012102.2    | 2.19 | 1.13 | 13.38 | 12.25 | 2.97E-08 | 0.000000342 |



Supplementary Table 2

|              |            |                |      |      |       |       |          |             |
|--------------|------------|----------------|------|------|-------|-------|----------|-------------|
| ILMN_1684628 | ZFP90      | NM_133458.1    | 1.56 | 0.64 | 13    | 12.35 | 3E-08    | 0.000000345 |
| ILMN_1692938 | PSAT1      | NM_021154.3    | 1.61 | 0.69 | 13.31 | 12.61 | 3.03E-08 | 0.000000348 |
| ILMN_1682081 | IBRDC3     | NM_153341.1    | 2.07 | 1.05 | 11.09 | 10.04 | 3.06E-08 | 0.000000351 |
| ILMN_2271149 | PGM5       | NM_021965.3    | 2.69 | 1.43 | 9.34  | 7.91  | 3.13E-08 | 0.000000359 |
| ILMN_2315964 | PSRC1      | NM_001032291.1 | 2.50 | 1.32 | 11.76 | 10.44 | 3.15E-08 | 0.000000361 |
| ILMN_1763208 | ZNF10      | NM_015394.4    | 2.04 | 1.03 | 10.56 | 9.53  | 3.22E-08 | 0.000000367 |
| ILMN_1787415 | SNX16      | NM_022133.2    | 1.84 | 0.88 | 10.61 | 9.73  | 3.32E-08 | 0.000000379 |
| ILMN_1760049 | SERGEF     | NM_012139.2    | 1.62 | 0.7  | 11.79 | 11.1  | 3.32E-08 | 0.000000379 |
| ILMN_1660727 | ENPP5      | NM_021572.4    | 1.79 | 0.84 | 9.1   | 8.27  | 3.32E-08 | 0.000000379 |
| ILMN_1758623 | HIST1H2BD  | NM_138720.1    | 2.08 | 1.06 | 10.94 | 9.88  | 3.34E-08 | 0.000000381 |
| ILMN_1691418 | NBLA10383  | NM_173622.2    | 1.79 | 0.84 | 10.11 | 9.27  | 3.36E-08 | 0.000000382 |
| ILMN_1716821 | GORASP1    | NM_031899.2    | 1.69 | 0.76 | 11.87 | 11.11 | 3.37E-08 | 0.000000384 |
| ILMN_2221046 | GM2A       | NM_000405.3    | 1.67 | 0.74 | 10.78 | 10.04 | 3.38E-08 | 0.000000385 |
| ILMN_1735680 | TMEM30A    | NM_018247.2    | 1.59 | 0.67 | 11.28 | 10.61 | 3.43E-08 | 0.00000039  |
| ILMN_2389376 | WDR23      | NM_025230.3    | 1.74 | 0.8  | 11.33 | 10.53 | 3.46E-08 | 0.000000393 |
| ILMN_1712095 | MLLT7      | NM_005938.1    | 1.88 | 0.91 | 10.33 | 9.41  | 3.47E-08 | 0.000000394 |
| ILMN_1784661 | TMEM2      | NM_013390.1    | 1.68 | 0.75 | 12.36 | 11.61 | 3.48E-08 | 0.000000395 |
| ILMN_1794213 | ABHD14A    | NM_015407.3    | 1.74 | 0.8  | 11.62 | 10.82 | 3.5E-08  | 0.000000397 |
| ILMN_2177823 | FLJ43806   | NM_201628.1    | 2.31 | 1.21 | 9.55  | 8.34  | 3.5E-08  | 0.000000397 |
| ILMN_1797893 | PFAAP5     | NM_014887.1    | 1.65 | 0.72 | 11.56 | 10.84 | 3.5E-08  | 0.000000397 |
| ILMN_1699728 | BTD        | NM_000060.2    | 1.83 | 0.87 | 10.19 | 9.32  | 3.57E-08 | 0.000000403 |
| ILMN_1786211 | HERC1      | NM_003922.2    | 2.22 | 1.15 | 11.06 | 9.92  | 3.57E-08 | 0.000000403 |
| ILMN_1725300 | MLL3       | NM_170606.2    | 1.77 | 0.82 | 11.28 | 10.46 | 3.59E-08 | 0.000000405 |
| ILMN_1703284 | SPIRE2     | NM_032451.1    | 1.66 | 0.73 | 9.82  | 9.09  | 3.59E-08 | 0.000000405 |
| ILMN_1777049 | ZNF160     | NM_033288.2    | 1.65 | 0.72 | 11.61 | 10.89 | 3.61E-08 | 0.000000407 |
| ILMN_1688031 | C14ORF44   | NM_152445.1    | 2.33 | 1.22 | 9.42  | 8.2   | 3.64E-08 | 0.00000041  |
| ILMN_1711504 | NRXN1      | NM_138735.1    | 2.73 | 1.45 | 9.43  | 7.98  | 3.68E-08 | 0.000000414 |
| ILMN_1711766 | SKP1A      | NM_170679.1    | 1.52 | 0.6  | 13.88 | 13.29 | 3.71E-08 | 0.000000418 |
| ILMN_1793743 | DIRC2      | NM_032839.1    | 1.53 | 0.61 | 12.8  | 12.19 | 3.74E-08 | 0.000000419 |
| ILMN_1774387 | ZHX3       | NM_015035.3    | 1.83 | 0.87 | 11.52 | 10.65 | 3.75E-08 | 0.000000421 |
| ILMN_2216838 | DKFZP58611 | NR_002186.1    | 1.87 | 0.9  | 10.11 | 9.21  | 3.79E-08 | 0.000000424 |
| ILMN_1764230 | GNPTG      | NM_032520.3    | 1.87 | 0.9  | 12.58 | 11.68 | 3.85E-08 | 0.000000431 |
| ILMN_2170209 | RASD2      | NM_014310.3    | 2.23 | 1.16 | 9.89  | 8.74  | 3.92E-08 | 0.000000438 |
| ILMN_2131177 | GUCY1A3    | NM_000856.2    | 2.19 | 1.13 | 8.76  | 7.63  | 3.93E-08 | 0.000000438 |
| ILMN_2064694 | STIM1      | NM_003156.2    | 1.99 | 0.99 | 11.42 | 10.44 | 3.95E-08 | 0.000000441 |
| ILMN_1695276 | MAPRE2     | NM_014268.1    | 1.61 | 0.69 | 13.44 | 12.75 | 3.99E-08 | 0.000000445 |
| ILMN_1800590 | BBS1       | NM_024649.4    | 1.64 | 0.71 | 12.24 | 11.53 | 4.05E-08 | 0.000000451 |
| ILMN_2055156 | PAG1       | NM_018440.3    | 1.75 | 0.81 | 11.12 | 10.32 | 4.13E-08 | 0.000000459 |
| ILMN_1660400 | BRUNOL4    | XM_943559.1    | 1.80 | 0.85 | 8.36  | 7.5   | 4.2E-08  | 0.000000466 |
| ILMN_1724250 | GRN        | NM_002087.2    | 1.71 | 0.77 | 12.54 | 11.77 | 4.2E-08  | 0.000000467 |
| ILMN_1730964 | MGC34761   | NM_173619.2    | 2.31 | 1.21 | 10    | 8.79  | 4.22E-08 | 0.000000469 |
| ILMN_2299795 | CPM        | NM_001005502.1 | 2.17 | 1.12 | 8.53  | 7.4   | 4.27E-08 | 0.000000473 |
| ILMN_2217212 | ZNF564     | NM_144976.2    | 1.71 | 0.77 | 10.94 | 10.18 | 4.28E-08 | 0.000000474 |

Supplementary Table 2

|              |          |                |      |      |       |       |          |             |
|--------------|----------|----------------|------|------|-------|-------|----------|-------------|
| ILMN_2201966 | N4BP1    | NM_153029.3    | 1.60 | 0.68 | 10.82 | 10.14 | 4.33E-08 | 0.000000479 |
| ILMN_2313434 | TCP1     | NM_030752.2    | 1.79 | 0.84 | 10.24 | 9.41  | 4.36E-08 | 0.000000481 |
| ILMN_1744403 | CSEN     | NM_013434.3    | 2.14 | 1.1  | 10.22 | 9.11  | 4.38E-08 | 0.000000484 |
| ILMN_1692865 | VPS37D   | XM_376631.3    | 1.83 | 0.87 | 12.43 | 11.57 | 4.41E-08 | 0.000000487 |
| ILMN_1775257 | PROK2    | NM_021935.2    | 1.83 | 0.87 | 8.49  | 7.62  | 4.43E-08 | 0.000000489 |
| ILMN_2297765 | KCNMA1   | NM_002247.2    | 1.89 | 0.92 | 10.85 | 9.92  | 4.44E-08 | 0.000000489 |
| ILMN_2374770 | TAX1BP1  | NM_001079864.1 | 1.64 | 0.71 | 13.82 | 13.11 | 4.46E-08 | 0.000000491 |
| ILMN_1796180 | CRY2     | NM_021117.1    | 1.74 | 0.8  | 10.73 | 9.93  | 4.48E-08 | 0.000000493 |
| ILMN_1767470 | SCPEP1   | NM_021626.1    | 1.56 | 0.64 | 11.79 | 11.15 | 4.49E-08 | 0.000000494 |
| ILMN_1792910 | MNT      | NM_020310.2    | 1.56 | 0.64 | 11.77 | 11.13 | 4.55E-08 | 0.0000005   |
| ILMN_1680109 | COL4A3BP | NM_005713.1    | 1.84 | 0.88 | 12.54 | 11.66 | 4.56E-08 | 0.0000005   |
| ILMN_2377240 | AKTIP    | NM_001012398.1 | 1.60 | 0.68 | 12.78 | 12.09 | 4.56E-08 | 0.0000005   |
| ILMN_1757129 | TMEM88   | NM_203411.1    | 1.78 | 0.83 | 9.06  | 8.22  | 4.57E-08 | 0.000000502 |
| ILMN_1676625 | SS18L1   | NM_015558.3    | 1.73 | 0.79 | 11.36 | 10.57 | 4.6E-08  | 0.000000505 |
| ILMN_1771689 | EXDL2    | NM_018199.1    | 1.54 | 0.62 | 12.39 | 11.77 | 4.6E-08  | 0.000000505 |
| ILMN_1744023 | MGC18216 | XM_927732.1    | 2.81 | 1.49 | 11.09 | 9.6   | 4.61E-08 | 0.000000505 |
| ILMN_1736974 | SOX12    | NM_006943.2    | 2.04 | 1.03 | 10.17 | 9.14  | 4.65E-08 | 0.000000509 |
| ILMN_1797341 | ARID1A   | NM_139135.1    | 1.61 | 0.69 | 13.35 | 12.65 | 4.69E-08 | 0.000000513 |
| ILMN_2075757 | LRIG3    | NM_153377.3    | 1.57 | 0.65 | 9.54  | 8.89  | 4.74E-08 | 0.000000517 |
| ILMN_1668469 | KIAA0922 | NM_015196.2    | 1.74 | 0.8  | 11.07 | 10.26 | 4.76E-08 | 0.000000519 |
| ILMN_1656186 | SLC41A1  | NM_173854.4    | 1.75 | 0.81 | 11.27 | 10.46 | 4.8E-08  | 0.000000523 |
| ILMN_1687440 | HIPK2    | NM_022740.2    | 1.65 | 0.72 | 12.19 | 11.48 | 4.84E-08 | 0.000000527 |
| ILMN_1723626 | APBA2    | NM_005503.2    | 2.06 | 1.04 | 10.06 | 9.02  | 4.89E-08 | 0.000000531 |
| ILMN_1776157 | 4-SEP    | NM_080417.1    | 2.03 | 1.02 | 11.46 | 10.44 | 4.92E-08 | 0.000000535 |
| ILMN_2317730 | ELMO2    | NM_133171.2    | 1.52 | 0.6  | 12.75 | 12.15 | 4.95E-08 | 0.000000537 |
| ILMN_1814247 | TCFL5    | NM_006602.2    | 1.61 | 0.69 | 11.22 | 10.53 | 5.05E-08 | 0.000000547 |
| ILMN_1760315 | VWCE     | NM_152718.1    | 1.93 | 0.95 | 9.46  | 8.51  | 5.23E-08 | 0.000000566 |
| ILMN_1727805 | SYNGR1   | NM_004711.3    | 1.60 | 0.68 | 10.99 | 10.32 | 5.24E-08 | 0.000000567 |
| ILMN_1739751 | SLC26A11 | NM_173626.1    | 1.57 | 0.65 | 11.23 | 10.58 | 5.25E-08 | 0.000000568 |
| ILMN_1736982 | PHACTR1  | NM_030948.1    | 3.16 | 1.66 | 9.87  | 8.22  | 5.37E-08 | 0.000000579 |
| ILMN_1782567 | GUCY1B3  | NM_000857.1    | 2.08 | 1.06 | 9.65  | 8.58  | 5.37E-08 | 0.00000058  |
| ILMN_1707649 | MPDZ     | NM_003829.1    | 1.66 | 0.73 | 12.43 | 11.7  | 5.44E-08 | 0.000000586 |
| ILMN_1808326 | NPAS3    | NM_022123.1    | 1.57 | 0.65 | 12.37 | 11.72 | 5.45E-08 | 0.000000587 |
| ILMN_2347068 | MKNK2    | NM_017572.2    | 1.53 | 0.61 | 12.16 | 11.56 | 5.49E-08 | 0.00000059  |
| ILMN_1712944 | AES      | NM_198969.1    | 1.61 | 0.69 | 14    | 13.32 | 5.51E-08 | 0.000000592 |
| ILMN_1711069 | YPEL5    | NM_016061.1    | 1.64 | 0.71 | 12.92 | 12.21 | 5.55E-08 | 0.000000597 |
| ILMN_2327795 | RERE     | NM_012102.3    | 2.07 | 1.05 | 11.99 | 10.94 | 5.59E-08 | 0.0000006   |
| ILMN_1726368 | ZNF135   | NM_003436.2    | 1.74 | 0.8  | 10.76 | 9.97  | 5.64E-08 | 0.000000605 |
| ILMN_1656192 | ZNF704   | NM_001033723.1 | 1.93 | 0.95 | 9.38  | 8.43  | 5.66E-08 | 0.000000606 |
| ILMN_1716507 | EPB41L1  | NM_012156.2    | 1.93 | 0.95 | 9.95  | 9     | 5.73E-08 | 0.000000614 |
| ILMN_1709740 | KIAA1344 | NM_020784.1    | 1.88 | 0.91 | 10.06 | 9.15  | 5.81E-08 | 0.000000622 |
| ILMN_1758806 | C21ORF2  | NM_004928.1    | 1.84 | 0.88 | 10.98 | 10.11 | 5.82E-08 | 0.000000623 |
| ILMN_1676984 | DDIT3    | NM_004083.4    | 1.69 | 0.76 | 10.97 | 10.2  | 5.84E-08 | 0.000000624 |

Supplementary Table 2

|              |            |                |      |      |       |       |          |             |
|--------------|------------|----------------|------|------|-------|-------|----------|-------------|
| ILMN_2351230 | RUFY3      | NM_001037442.1 | 2.04 | 1.03 | 11.55 | 10.52 | 5.86E-08 | 0.000000627 |
| ILMN_1723743 | ROM1       | NM_000327.2    | 2.03 | 1.02 | 10.88 | 9.86  | 5.88E-08 | 0.000000628 |
| ILMN_1745242 | PLSCR1     | NM_021105.1    | 1.83 | 0.87 | 10.02 | 9.15  | 5.88E-08 | 0.000000628 |
| ILMN_2051684 | LOC401152  | NM_001001701.1 | 1.87 | 0.9  | 11.64 | 10.73 | 5.92E-08 | 0.000000632 |
| ILMN_1663754 | ZNF442     | NM_030824.1    | 1.71 | 0.77 | 9.46  | 8.7   | 6.09E-08 | 0.000000649 |
| ILMN_2360401 | LFNG       | NM_001040168.1 | 1.75 | 0.81 | 8.7   | 7.88  | 6.11E-08 | 0.000000651 |
| ILMN_2297526 | HYDIN      | NM_032821.2    | 2.06 | 1.04 | 8.72  | 7.68  | 6.17E-08 | 0.000000655 |
| ILMN_1652952 | RASAL2     | NM_004841.2    | 2.30 | 1.2  | 8.54  | 7.34  | 6.2E-08  | 0.000000658 |
| ILMN_1665004 | CASC3      | NM_007359.3    | 1.55 | 0.63 | 12.07 | 11.43 | 6.23E-08 | 0.000000661 |
| ILMN_1779416 | SCUBE2     | NM_020974.1    | 1.79 | 0.84 | 8.3   | 7.46  | 6.26E-08 | 0.000000664 |
| ILMN_2201678 | FSTL1      | NM_007085.3    | 1.84 | 0.88 | 12.67 | 11.79 | 6.27E-08 | 0.000000664 |
| ILMN_2290776 | FLJ21839   | NM_021831.5    | 1.85 | 0.89 | 9.87  | 8.98  | 6.37E-08 | 0.000000674 |
| ILMN_1672589 | SEMA4B     | NM_020210.2    | 1.73 | 0.79 | 12.15 | 11.35 | 6.46E-08 | 0.000000684 |
| ILMN_1814074 | PHKA2      | NM_000292.1    | 1.92 | 0.94 | 10.81 | 9.87  | 6.56E-08 | 0.000000693 |
| ILMN_2410742 | JMJD1C     | NM_032776.1    | 1.92 | 0.94 | 11.44 | 10.5  | 6.58E-08 | 0.000000695 |
| ILMN_1769520 | UBE2L6     | NM_004223.3    | 1.55 | 0.63 | 14.23 | 13.6  | 6.85E-08 | 0.000000721 |
| ILMN_1662619 | TFPI       | NM_001032281.1 | 1.79 | 0.84 | 10.79 | 9.95  | 6.87E-08 | 0.000000723 |
| ILMN_1764729 | JAG2       | NM_002226.3    | 2.08 | 1.06 | 9.41  | 8.35  | 6.88E-08 | 0.000000724 |
| ILMN_1769091 | PRCP       | NM_199418.1    | 1.52 | 0.6  | 14.15 | 13.55 | 6.92E-08 | 0.000000727 |
| ILMN_1793371 | LKAP       | NM_014647.1    | 1.69 | 0.76 | 12.91 | 12.16 | 6.94E-08 | 0.000000729 |
| ILMN_1750144 | C3ORF19    | NM_016474.3    | 1.65 | 0.72 | 12.29 | 11.56 | 6.96E-08 | 0.000000731 |
| ILMN_1673491 | LRAT       | NM_004744.3    | 2.28 | 1.19 | 8.84  | 7.65  | 7E-08    | 0.000000734 |
| ILMN_1786215 | ZNF3       | NM_017715.2    | 1.58 | 0.66 | 10.65 | 9.99  | 7.15E-08 | 0.000000748 |
| ILMN_1746492 | RABL4      | NM_006860.2    | 1.58 | 0.66 | 11.44 | 10.78 | 7.2E-08  | 0.000000754 |
| ILMN_1749962 | NCAM2      | NM_004540.2    | 2.20 | 1.14 | 10.35 | 9.21  | 7.24E-08 | 0.000000757 |
| ILMN_1727080 | MYO6       | NM_004999.2    | 1.61 | 0.69 | 10.55 | 9.86  | 7.31E-08 | 0.000000762 |
| ILMN_1767722 | AFTIPHILIN | NM_203437.2    | 2.43 | 1.28 | 9.86  | 8.58  | 7.32E-08 | 0.000000763 |
| ILMN_1809537 | MASP1      | NM_139125.2    | 3.14 | 1.65 | 9.49  | 7.84  | 7.39E-08 | 0.00000077  |
| ILMN_1811648 | DCAKD      | NM_024819.3    | 1.55 | 0.63 | 13.92 | 13.29 | 7.44E-08 | 0.000000773 |
| ILMN_1786976 | RAB22A     | NM_020673.2    | 1.59 | 0.67 | 12.78 | 12.11 | 7.45E-08 | 0.000000774 |
| ILMN_1738099 | C2ORF34    | NM_024766.1    | 1.57 | 0.65 | 11    | 10.35 | 7.46E-08 | 0.000000775 |
| ILMN_1687768 | NCOA7      | NM_181782.2    | 1.95 | 0.96 | 10.81 | 9.85  | 7.56E-08 | 0.000000785 |
| ILMN_1684155 | FLJ23584   | NM_024588.3    | 1.74 | 0.8  | 11.11 | 10.31 | 7.56E-08 | 0.000000785 |
| ILMN_1774287 | CFB        | NM_001710.4    | 2.13 | 1.09 | 8.53  | 7.44  | 7.58E-08 | 0.000000786 |
| ILMN_1768798 | SPAG9      | NM_172345.1    | 1.95 | 0.96 | 10.92 | 9.96  | 7.59E-08 | 0.000000788 |
| ILMN_2068698 | RSHL3      | NM_001010892.1 | 2.27 | 1.18 | 8.95  | 7.77  | 7.62E-08 | 0.00000079  |
| ILMN_1800733 | MANBA      | NM_005908.2    | 1.62 | 0.7  | 11.94 | 11.24 | 7.64E-08 | 0.000000791 |
| ILMN_2252295 | ELF2       | NM_201999.1    | 1.74 | 0.8  | 9.54  | 8.74  | 7.65E-08 | 0.000000792 |
| ILMN_1740500 | TSPYL4     | NM_021648.4    | 1.69 | 0.76 | 10.96 | 10.2  | 7.71E-08 | 0.000000798 |
| ILMN_1741698 | OPCML      | NM_001012393.1 | 2.95 | 1.56 | 9.49  | 7.92  | 7.75E-08 | 0.000000801 |
| ILMN_1719938 | FGF11      | NM_004112.2    | 1.80 | 0.85 | 10.53 | 9.69  | 7.77E-08 | 0.000000802 |
| ILMN_1792419 | LOC90167   | NM_194277.1    | 1.92 | 0.94 | 8.23  | 7.29  | 7.86E-08 | 0.000000811 |
| ILMN_1741131 | CHRN1      | NM_000747.2    | 1.58 | 0.66 | 11.33 | 10.66 | 7.93E-08 | 0.000000818 |

Supplementary Table 2

|              |           |                |      |      |       |       |           |             |
|--------------|-----------|----------------|------|------|-------|-------|-----------|-------------|
| ILMN_2090351 | OR7E156P  | NR_002171.1    | 1.78 | 0.83 | 10.56 | 9.73  | 7.97E-08  | 0.000000821 |
| ILMN_1656656 | LOC90639  | NM_001031617.1 | 1.92 | 0.94 | 10.81 | 9.86  | 8.04E-08  | 0.000000828 |
| ILMN_1812191 | C12ORF57  | NM_138425.2    | 1.67 | 0.74 | 14    | 13.26 | 8.06E-08  | 0.000000829 |
| ILMN_1654629 | MGC4618   | NM_032326.2    | 1.64 | 0.71 | 12.08 | 11.37 | 8.11E-08  | 0.000000833 |
| ILMN_1780598 | PIAS1     | NM_016166.1    | 1.53 | 0.61 | 11.68 | 11.06 | 8.17E-08  | 0.00000084  |
| ILMN_1729288 | C1QTNF6   | NM_031910.3    | 1.84 | 0.88 | 11.09 | 10.21 | 8.21E-08  | 0.000000843 |
| ILMN_1674031 | PKIA      | NM_006823.2    | 1.60 | 0.68 | 10.24 | 9.56  | 8.29E-08  | 0.00000085  |
| ILMN_1761788 | MOXD1     | NM_001031699.1 | 1.64 | 0.71 | 13.67 | 12.96 | 8.32E-08  | 0.000000853 |
| ILMN_2213297 | C11ORF54  | NM_014039.2    | 1.57 | 0.65 | 11.68 | 11.03 | 8.37E-08  | 0.000000857 |
| ILMN_1672135 | ZNF615    | NM_198480.2    | 1.58 | 0.66 | 11.44 | 10.78 | 8.42E-08  | 0.000000862 |
| ILMN_2098947 | LOC338799 | NR_002809.1    | 2.06 | 1.04 | 10.31 | 9.27  | 8.53E-08  | 0.000000872 |
| ILMN_1788400 | KIAA2022  | NM_001008537.1 | 2.23 | 1.16 | 8.36  | 7.21  | 8.63E-08  | 0.000000881 |
| ILMN_2151522 | CRISPLD1  | NM_031461.3    | 2.39 | 1.26 | 10.91 | 9.65  | 8.65E-08  | 0.000000883 |
| ILMN_1767503 | GABRB3    | XM_937254.1    | 1.85 | 0.89 | 11.23 | 10.34 | 8.76E-08  | 0.000000893 |
| ILMN_1714990 | DBT       | NM_001918.1    | 1.71 | 0.77 | 12.7  | 11.93 | 8.81E-08  | 0.000000896 |
| ILMN_2230566 | RAB40B    | NM_006822.1    | 1.61 | 0.69 | 12.04 | 11.35 | 8.82E-08  | 0.000000897 |
| ILMN_1779252 | TRIM22    | NM_006074.2    | 1.54 | 0.62 | 11.06 | 10.44 | 8.85E-08  | 0.0000009   |
| ILMN_1736078 | THBS4     | NM_003248.3    | 1.65 | 0.72 | 10.59 | 9.87  | 8.86E-08  | 0.0000009   |
| ILMN_1808217 | PPP1R1C   | XM_945023.1    | 1.77 | 0.82 | 12.35 | 11.52 | 8.92E-08  | 0.000000904 |
| ILMN_1752199 | LHPP      | NM_022126.2    | 1.89 | 0.92 | 11.55 | 10.63 | 9.01E-08  | 0.000000913 |
| ILMN_1771964 | GSTA4     | NM_001512.2    | 1.51 | 0.59 | 13.07 | 12.48 | 9.08E-08  | 0.000000919 |
| ILMN_1652762 | HIC2      | NM_015094.1    | 1.61 | 0.69 | 11.48 | 10.79 | 9.09E-08  | 0.00000092  |
| ILMN_1793522 | PRKAB1    | NM_006253.4    | 1.55 | 0.63 | 11.88 | 11.25 | 9.2E-08   | 0.00000093  |
| ILMN_2408080 | SNAP25    | NM_130811.1    | 1.96 | 0.97 | 10.57 | 9.6   | 9.27E-08  | 0.000000936 |
| ILMN_2378100 | FBXL5     | NM_012161.2    | 1.52 | 0.6  | 12.89 | 12.29 | 9.35E-08  | 0.000000944 |
| ILMN_1689200 | DHDH      | NM_014475.2    | 1.91 | 0.93 | 9.12  | 8.19  | 9.56E-08  | 0.000000963 |
| ILMN_1652521 | MTMR9     | NM_015458.3    | 1.59 | 0.67 | 12.2  | 11.53 | 9.69E-08  | 0.000000975 |
| ILMN_1739876 | RAB3GAP1  | NM_012233.1    | 1.51 | 0.59 | 13.29 | 12.7  | 9.7E-08   | 0.000000975 |
| ILMN_1652826 | LRRC17    | NM_001031692.1 | 1.51 | 0.59 | 13.07 | 12.48 | 9.7E-08   | 0.000000975 |
| ILMN_2057981 | C8ORF70   | NM_016010.1    | 1.91 | 0.93 | 11.95 | 11.02 | 9.78E-08  | 0.000000983 |
| ILMN_1657058 | PPIL6     | NM_173672.1    | 2.11 | 1.08 | 9.75  | 8.68  | 9.92E-08  | 0.000000995 |
| ILMN_1803194 | GALK1     | NM_000154.1    | 1.67 | 0.74 | 12.94 | 12.21 | 9.94E-08  | 0.000000997 |
| ILMN_1716154 | C5ORF4    | NM_032385.1    | 2.13 | 1.09 | 9.18  | 8.09  | 9.96E-08  | 0.000000999 |
| ILMN_2406304 | PDZRN3    | NM_015009.1    | 2.20 | 1.14 | 9.42  | 8.29  | 9.98E-08  | 0.000001    |
| ILMN_1794490 | FLJ10781  | NM_018215.2    | 1.52 | 0.6  | 12.08 | 11.48 | 9.99E-08  | 0.000001    |
| ILMN_1715669 | TP53I11   | NM_006034.2    | 2.53 | 1.34 | 10.52 | 9.18  | 0.0000001 | 0.000001    |
| ILMN_1764795 | FMN2      | NM_020066.3    | 2.36 | 1.24 | 10.78 | 9.55  | 0.0000001 | 0.000001    |
| ILMN_1764970 | JMJD1C    | NM_004241.2    | 1.93 | 0.95 | 11.86 | 10.92 | 1.02E-07  | 0.00000102  |
| ILMN_1656676 | ZYG11B    | NM_024646.1    | 1.52 | 0.6  | 13.3  | 12.7  | 1.03E-07  | 0.00000103  |
| ILMN_1677829 | SLC9A6    | NM_006359.1    | 1.62 | 0.7  | 11.83 | 11.13 | 1.03E-07  | 0.00000103  |
| ILMN_1685722 | EIF4A2    | NM_001967.2    | 1.49 | 0.58 | 15.06 | 14.48 | 1.03E-07  | 0.00000103  |
| ILMN_1754643 | DGCR13    | NM_001024733.1 | 2.11 | 1.08 | 9.56  | 8.48  | 1.04E-07  | 0.00000104  |
| ILMN_1676891 | CDC2L6    | NM_015076.3    | 1.54 | 0.62 | 12.9  | 12.28 | 1.07E-07  | 0.00000106  |

Supplementary Table 2

|              |           |                |      |      |       |       |          |            |
|--------------|-----------|----------------|------|------|-------|-------|----------|------------|
| ILMN_1800354 | CST3      | NM_000099.2    | 1.52 | 0.6  | 15.35 | 14.75 | 1.07E-07 | 0.00000106 |
| ILMN_1730039 | IGSF21    | NM_032880.2    | 2.06 | 1.04 | 8.22  | 7.18  | 1.07E-07 | 0.00000106 |
| ILMN_2082314 | TOM1      | NM_005488.1    | 1.52 | 0.6  | 12.24 | 11.64 | 1.08E-07 | 0.00000107 |
| ILMN_1778203 | CLN5      | NM_006493.1    | 1.69 | 0.76 | 12.2  | 11.45 | 1.08E-07 | 0.00000107 |
| ILMN_1657606 | ZFHX4     | NM_024721.2    | 2.10 | 1.07 | 11.5  | 10.43 | 1.09E-07 | 0.00000108 |
| ILMN_1784753 | PAIP2     | NM_001033112.1 | 1.52 | 0.6  | 13.93 | 13.33 | 1.1E-07  | 0.00000108 |
| ILMN_1718907 | SDCCAG33  | NM_005786.3    | 1.72 | 0.78 | 12    | 11.21 | 1.1E-07  | 0.00000109 |
| ILMN_1790149 | HGF       | NM_001010932.1 | 1.74 | 0.8  | 8.98  | 8.18  | 1.13E-07 | 0.00000111 |
| ILMN_1799467 | SAMD9L    | NM_152703.2    | 2.58 | 1.37 | 9.76  | 8.39  | 1.13E-07 | 0.00000112 |
| ILMN_2083946 | TGFA      | NM_003236.1    | 2.66 | 1.41 | 9.56  | 8.15  | 1.14E-07 | 0.00000112 |
| ILMN_1658830 | C10ORF26  | NM_017787.3    | 1.69 | 0.76 | 11.63 | 10.87 | 1.15E-07 | 0.00000113 |
| ILMN_1660810 | TTC17     | NM_018259.3    | 1.61 | 0.69 | 11.88 | 11.19 | 1.18E-07 | 0.00000115 |
| ILMN_1720430 | C20ORF149 | NM_024299.2    | 1.74 | 0.8  | 11.46 | 10.66 | 1.18E-07 | 0.00000116 |
| ILMN_2191720 | ZNF471    | NM_020813.1    | 1.82 | 0.86 | 10.12 | 9.27  | 1.18E-07 | 0.00000116 |
| ILMN_2405602 | OSBPL1A   | NM_080597.2    | 1.66 | 0.73 | 12.62 | 11.89 | 1.19E-07 | 0.00000116 |
| ILMN_1676822 | ECRG4     | NM_032411.1    | 2.27 | 1.18 | 9.62  | 8.44  | 1.21E-07 | 0.00000118 |
| ILMN_1774110 | CHN2      | NM_004067.1    | 1.92 | 0.94 | 10.06 | 9.12  | 1.25E-07 | 0.00000122 |
| ILMN_1800602 | GCA       | NM_012198.2    | 1.53 | 0.61 | 12.14 | 11.54 | 1.25E-07 | 0.00000122 |
| ILMN_1703379 | VPS41     | NM_014396.3    | 1.59 | 0.67 | 13.41 | 12.74 | 1.27E-07 | 0.00000124 |
| ILMN_1685679 | RNF146    | NM_030963.2    | 1.57 | 0.65 | 12.21 | 11.56 | 1.28E-07 | 0.00000125 |
| ILMN_1813949 | CASQ1     | NM_001231.2    | 2.06 | 1.04 | 9.5   | 8.46  | 1.28E-07 | 0.00000125 |
| ILMN_1766366 | ALS2CR15  | NM_138468.3    | 1.83 | 0.87 | 9.97  | 9.1   | 1.3E-07  | 0.00000126 |
| ILMN_1776188 | MAP1LC3A  | NM_181509.1    | 1.88 | 0.91 | 13.78 | 12.88 | 1.34E-07 | 0.0000013  |
| ILMN_1756849 | HIST1H2AE | NM_021052.2    | 1.69 | 0.76 | 8.8   | 8.04  | 1.34E-07 | 0.0000013  |
| ILMN_2381559 | ASTN2     | NM_198187.2    | 1.69 | 0.76 | 8.76  | 8     | 1.35E-07 | 0.0000013  |
| ILMN_1734483 | BSDC1     | NM_018045.4    | 1.66 | 0.73 | 12.76 | 12.03 | 1.36E-07 | 0.00000131 |
| ILMN_1661309 | XKR4      | NM_052898.1    | 2.53 | 1.34 | 8.63  | 7.29  | 1.36E-07 | 0.00000131 |
| ILMN_1718565 | CDKN1C    | NM_000076.1    | 1.82 | 0.86 | 8.64  | 7.78  | 1.39E-07 | 0.00000134 |
| ILMN_1660436 | HSPA1B    | NM_005346.3    | 1.73 | 0.79 | 13.75 | 12.96 | 1.41E-07 | 0.00000136 |
| ILMN_1691299 | C1ORF192  | NM_001013625.2 | 2.04 | 1.03 | 8.78  | 7.75  | 1.41E-07 | 0.00000136 |
| ILMN_1725528 | LOC400657 | NM_001008234.1 | 1.54 | 0.62 | 11.47 | 10.85 | 1.41E-07 | 0.00000136 |
| ILMN_1701025 | EPHX1     | NM_000120.2    | 1.71 | 0.77 | 11.51 | 10.74 | 1.42E-07 | 0.00000137 |
| ILMN_1787951 | RABL5     | NM_022777.1    | 1.65 | 0.72 | 9.97  | 9.25  | 1.49E-07 | 0.00000143 |
| ILMN_2386982 | PRKCZ     | NM_002744.4    | 1.72 | 0.78 | 11.44 | 10.66 | 1.49E-07 | 0.00000143 |
| ILMN_1751904 | EDNRB     | NM_003991.1    | 1.60 | 0.68 | 12.24 | 11.56 | 1.49E-07 | 0.00000143 |
| ILMN_1735552 | KIF1B     | NM_015074.2    | 1.60 | 0.68 | 13.61 | 12.92 | 1.51E-07 | 0.00000145 |
| ILMN_1678690 | UPB1      | NM_016327.2    | 1.82 | 0.86 | 8.11  | 7.25  | 1.53E-07 | 0.00000146 |
| ILMN_1665205 | ZFP260    | NM_001012756.1 | 1.53 | 0.61 | 12.05 | 11.44 | 1.54E-07 | 0.00000147 |
| ILMN_1688730 | DNAJC18   | NM_152686.2    | 1.51 | 0.59 | 11.6  | 11.01 | 1.55E-07 | 0.00000148 |
| ILMN_1793616 | RNF38     | NM_194331.1    | 1.77 | 0.82 | 13.21 | 12.39 | 1.57E-07 | 0.0000015  |
| ILMN_1769394 | PLCD1     | NM_006225.1    | 2.01 | 1.01 | 11.42 | 10.41 | 1.59E-07 | 0.00000152 |
| ILMN_1658384 | CRTAC1    | NM_018058.4    | 1.69 | 0.76 | 8.26  | 7.5   | 1.61E-07 | 0.00000154 |
| ILMN_1691702 | MGC33584  | NM_173680.2    | 1.66 | 0.73 | 10.71 | 9.98  | 1.63E-07 | 0.00000155 |

Supplementary Table 2

|              |          |                |      |      |       |       |          |            |
|--------------|----------|----------------|------|------|-------|-------|----------|------------|
| ILMN_1703891 | TBC1D9   | NM_015130.1    | 3.86 | 1.95 | 11.39 | 9.44  | 1.7E-07  | 0.00000161 |
| ILMN_1753002 | RAB2B    | NM_032846.2    | 1.52 | 0.6  | 13.73 | 13.14 | 1.7E-07  | 0.00000161 |
| ILMN_2189859 | FLJ38482 | NM_152681.1    | 1.56 | 0.64 | 10.7  | 10.07 | 1.7E-07  | 0.00000162 |
| ILMN_2350357 | ZNF254   | NM_004876.2    | 1.97 | 0.98 | 10.79 | 9.81  | 1.7E-07  | 0.00000162 |
| ILMN_2186216 | GOLPH4   | NM_014498.2    | 1.67 | 0.74 | 12.69 | 11.95 | 1.71E-07 | 0.00000163 |
| ILMN_2289381 | DKK3     | NM_013253.4    | 1.65 | 0.72 | 11    | 10.29 | 1.73E-07 | 0.00000164 |
| ILMN_1653783 | MLC1     | NM_139202.1    | 2.25 | 1.17 | 11.76 | 10.58 | 1.75E-07 | 0.00000165 |
| ILMN_2371440 | B3GAT1   | NM_018644.3    | 1.79 | 0.84 | 11.81 | 10.97 | 1.79E-07 | 0.0000017  |
| ILMN_2353732 | CD8A     | NM_171827.2    | 2.20 | 1.14 | 8.5   | 7.36  | 1.8E-07  | 0.0000017  |
| ILMN_1668194 | LMTK3    | XM_936372.1    | 1.71 | 0.77 | 12.27 | 11.5  | 1.81E-07 | 0.00000171 |
| ILMN_2113490 | NTN4     | NM_021229.3    | 1.91 | 0.93 | 9.64  | 8.71  | 1.82E-07 | 0.00000171 |
| ILMN_1749792 | SORBS1   | NM_015385.1    | 1.82 | 0.86 | 12.38 | 11.52 | 1.83E-07 | 0.00000172 |
| ILMN_1660341 | LRPAP1   | NM_002337.1    | 1.52 | 0.6  | 11.79 | 11.19 | 1.86E-07 | 0.00000175 |
| ILMN_2347424 | MBOAT2   | NM_138799.2    | 1.95 | 0.96 | 10.01 | 9.05  | 1.87E-07 | 0.00000176 |
| ILMN_1730347 | MGC12981 | NM_032357.2    | 1.53 | 0.61 | 12.29 | 11.69 | 1.87E-07 | 0.00000176 |
| ILMN_2397521 | JMJD3    | NM_001080424.1 | 2.23 | 1.16 | 9.31  | 8.14  | 1.88E-07 | 0.00000177 |
| ILMN_1701461 | TIMP3    | NM_000362.4    | 2.07 | 1.05 | 9.84  | 8.79  | 1.9E-07  | 0.00000179 |
| ILMN_1720604 | ARSG     | NM_014960.2    | 1.82 | 0.86 | 9.41  | 8.55  | 1.91E-07 | 0.00000179 |
| ILMN_1784783 | NME5     | NM_003551.2    | 1.72 | 0.78 | 10.76 | 9.98  | 1.93E-07 | 0.0000018  |
| ILMN_1752927 | KIAA1600 | NM_020940.2    | 2.20 | 1.14 | 11.49 | 10.35 | 1.93E-07 | 0.0000018  |
| ILMN_1801658 | BMPR1B   | NM_001203.1    | 1.68 | 0.75 | 8.56  | 7.81  | 1.93E-07 | 0.00000181 |
| ILMN_2181670 | SYT14    | NM_153262.1    | 1.93 | 0.95 | 8.87  | 7.92  | 1.97E-07 | 0.00000184 |
| ILMN_1665207 | C10ORF85 | NM_001012711.1 | 2.11 | 1.08 | 9.66  | 8.59  | 1.97E-07 | 0.00000184 |
| ILMN_2089073 | ATP9A    | NM_006045.1    | 1.69 | 0.76 | 14.08 | 13.32 | 1.98E-07 | 0.00000184 |
| ILMN_1797021 | TMEM86A  | NM_153347.1    | 1.78 | 0.83 | 9.48  | 8.65  | 1.98E-07 | 0.00000184 |
| ILMN_1758087 | TAOK1    | NM_020791.1    | 1.62 | 0.7  | 10.31 | 9.62  | 1.98E-07 | 0.00000184 |
| ILMN_1684497 | C10ORF33 | NM_032709.1    | 1.62 | 0.7  | 10.95 | 10.25 | 1.99E-07 | 0.00000185 |
| ILMN_1713759 | UBE2J1   | NM_016021.2    | 1.49 | 0.58 | 12.07 | 11.49 | 2.01E-07 | 0.00000186 |
| ILMN_2225735 | CRBN     | NM_016302.2    | 1.60 | 0.68 | 11.5  | 10.82 | 2.01E-07 | 0.00000187 |
| ILMN_1707312 | NFIL3    | NM_005384.2    | 1.79 | 0.84 | 10.52 | 9.68  | 2.02E-07 | 0.00000187 |
| ILMN_1789541 | CRMP1    | NM_001014809.1 | 1.68 | 0.75 | 15.08 | 14.33 | 2.02E-07 | 0.00000187 |
| ILMN_1788059 | PCGF5    | NM_032373.2    | 2.06 | 1.04 | 9.55  | 8.51  | 2.05E-07 | 0.0000019  |
| ILMN_1698148 | CHD5     | NM_015557.1    | 2.41 | 1.27 | 9.18  | 7.91  | 2.05E-07 | 0.0000019  |
| ILMN_1723116 | AMFR     | NM_138958.1    | 1.71 | 0.77 | 13.39 | 12.63 | 2.08E-07 | 0.00000192 |
| ILMN_1690682 | B3GALT4  | NM_003782.3    | 1.99 | 0.99 | 9.29  | 8.3   | 2.12E-07 | 0.00000195 |
| ILMN_1684017 | GYG2     | NM_003918.1    | 1.85 | 0.89 | 10.54 | 9.65  | 2.14E-07 | 0.00000197 |
| ILMN_1675797 | EPDR1    | NM_017549.2    | 1.52 | 0.6  | 13.71 | 13.11 | 2.15E-07 | 0.00000198 |
| ILMN_1809141 | ING4     | NM_198287.1    | 1.79 | 0.84 | 11.39 | 10.55 | 2.17E-07 | 0.00000199 |
| ILMN_2173919 | MYO9A    | NM_006901.1    | 2.01 | 1.01 | 10.84 | 9.83  | 2.19E-07 | 0.00000201 |
| ILMN_1788886 | TOX      | NM_014729.2    | 1.69 | 0.76 | 10.59 | 9.83  | 2.2E-07  | 0.00000202 |
| ILMN_2061565 | PLCH2    | NM_014638.2    | 2.23 | 1.16 | 9.89  | 8.73  | 2.21E-07 | 0.00000203 |
| ILMN_2117623 | PLXNC1   | NM_005761.1    | 2.62 | 1.39 | 9.16  | 7.77  | 2.21E-07 | 0.00000203 |
| ILMN_1705258 | CPZ      | NM_001014447.1 | 1.93 | 0.95 | 8.57  | 7.62  | 2.24E-07 | 0.00000205 |

Supplementary Table 2

|              |           |                |      |      |       |       |          |            |
|--------------|-----------|----------------|------|------|-------|-------|----------|------------|
| ILMN_1774742 | MTTP      | NM_000253.1    | 2.35 | 1.23 | 9.81  | 8.59  | 2.25E-07 | 0.00000206 |
| ILMN_1685124 | FLJ21127  | NM_024549.3    | 1.59 | 0.67 | 12.6  | 11.93 | 2.27E-07 | 0.00000208 |
| ILMN_1779965 | AK1       | NM_000476.1    | 1.66 | 0.73 | 11.12 | 10.39 | 2.28E-07 | 0.00000209 |
| ILMN_1733288 | C1RL      | NM_016546.1    | 1.56 | 0.64 | 10.82 | 10.18 | 2.29E-07 | 0.00000209 |
| ILMN_1766528 | SLC25A36  | NM_018155.1    | 1.62 | 0.7  | 11.32 | 10.63 | 2.3E-07  | 0.0000021  |
| ILMN_1670535 | NDRG2     | NM_201535.1    | 2.03 | 1.02 | 9.59  | 8.57  | 2.32E-07 | 0.00000212 |
| ILMN_1665526 | TCEA2     | NM_003195.4    | 1.60 | 0.68 | 13.33 | 12.65 | 2.33E-07 | 0.00000212 |
| ILMN_1668022 | EPHA5     | NM_004439.4    | 1.92 | 0.94 | 8.18  | 7.24  | 2.33E-07 | 0.00000212 |
| ILMN_1656482 | OSBPL2    | NM_144498.1    | 1.67 | 0.74 | 11.93 | 11.19 | 2.34E-07 | 0.00000213 |
| ILMN_1663035 | SREBF1    | NM_004176.3    | 1.75 | 0.81 | 12.36 | 11.55 | 2.36E-07 | 0.00000215 |
| ILMN_1773576 | CPNE3     | NM_003909.2    | 1.51 | 0.59 | 13.83 | 13.25 | 2.37E-07 | 0.00000216 |
| ILMN_1701134 | PTEN      | NM_000314.3    | 1.53 | 0.61 | 11.87 | 11.25 | 2.37E-07 | 0.00000216 |
| ILMN_1768482 | CD8A      | NM_001768.4    | 1.91 | 0.93 | 8.51  | 7.58  | 2.44E-07 | 0.00000221 |
| ILMN_1725417 | NELL2     | NM_006159.1    | 1.77 | 0.82 | 11.62 | 10.8  | 2.45E-07 | 0.00000222 |
| ILMN_2195462 | C1QTNF4   | NM_031909.1    | 2.13 | 1.09 | 9.15  | 8.07  | 2.45E-07 | 0.00000222 |
| ILMN_1741613 | SERINC1   | NM_020755.2    | 1.88 | 0.91 | 12.62 | 11.71 | 2.45E-07 | 0.00000222 |
| ILMN_2152429 | FLJ40142  | NM_207435.1    | 1.57 | 0.65 | 12.77 | 12.12 | 2.49E-07 | 0.00000225 |
| ILMN_1681829 | ZNF606    | NM_025027.3    | 1.75 | 0.81 | 10.51 | 9.7   | 2.5E-07  | 0.00000226 |
| ILMN_1773964 | H1FX      | NM_006026.2    | 1.68 | 0.75 | 12.56 | 11.82 | 2.51E-07 | 0.00000227 |
| ILMN_1693853 | HHAT      | NM_018194.1    | 1.95 | 0.96 | 9.22  | 8.26  | 2.52E-07 | 0.00000228 |
| ILMN_2325347 | B3GALNT1  | NM_033168.2    | 1.52 | 0.6  | 11.78 | 11.18 | 2.55E-07 | 0.0000023  |
| ILMN_1732717 | LOC112703 | NM_138411.1    | 1.58 | 0.66 | 10.54 | 9.88  | 2.6E-07  | 0.00000234 |
| ILMN_1779706 | TP53BP2   | NM_001031685.1 | 1.55 | 0.63 | 12.53 | 11.9  | 2.6E-07  | 0.00000234 |
| ILMN_1725910 | CNTFR     | NM_147164.1    | 2.16 | 1.11 | 9.07  | 7.96  | 2.66E-07 | 0.0000024  |
| ILMN_1768260 | GAS6      | NM_000820.1    | 2.03 | 1.02 | 8.66  | 7.65  | 2.67E-07 | 0.0000024  |
| ILMN_1667162 | NKX3-1    | NM_006167.2    | 2.31 | 1.21 | 8.61  | 7.4   | 2.67E-07 | 0.0000024  |
| ILMN_1739641 | MTMR3     | NM_153050.1    | 1.84 | 0.88 | 12.19 | 11.3  | 2.7E-07  | 0.00000243 |
| ILMN_1716678 | NPC2      | NM_006432.3    | 1.61 | 0.69 | 15.19 | 14.5  | 2.77E-07 | 0.00000249 |
| ILMN_1712657 | FALZ      | NM_004459.5    | 2.25 | 1.17 | 9.95  | 8.77  | 2.8E-07  | 0.00000251 |
| ILMN_1693597 | ZNF287    | NM_020653.1    | 1.87 | 0.9  | 9.61  | 8.71  | 2.8E-07  | 0.00000252 |
| ILMN_1784292 | ANKMY2    | NM_020319.1    | 1.61 | 0.69 | 11.8  | 11.11 | 2.81E-07 | 0.00000252 |
| ILMN_1769013 | ASGR1     | NM_001671.2    | 1.83 | 0.87 | 10.4  | 9.53  | 2.88E-07 | 0.00000257 |
| ILMN_1764873 | ELAVL1    | NM_001419.2    | 1.73 | 0.79 | 11.64 | 10.84 | 2.88E-07 | 0.00000258 |
| ILMN_2354617 | DYRK1B    | NM_004714.1    | 1.79 | 0.84 | 9.43  | 8.59  | 2.88E-07 | 0.00000258 |
| ILMN_2373566 | PJA1      | NM_001032396.1 | 1.51 | 0.59 | 12.82 | 12.22 | 2.88E-07 | 0.00000258 |
| ILMN_1750386 | NPPA      | NM_006172.1    | 1.95 | 0.96 | 8.23  | 7.26  | 2.89E-07 | 0.00000258 |
| ILMN_2402363 | STK19     | NM_004197.1    | 1.57 | 0.65 | 12.5  | 11.84 | 2.95E-07 | 0.00000263 |
| ILMN_2130218 | PAK3      | NM_002578.2    | 2.19 | 1.13 | 8.63  | 7.5   | 2.95E-07 | 0.00000263 |
| ILMN_2340027 | TSPAN4    | NM_001025238.1 | 1.61 | 0.69 | 11.77 | 11.09 | 3.02E-07 | 0.00000269 |
| ILMN_1791202 | SMOC1     | NM_022137.3    | 2.14 | 1.1  | 10.24 | 9.14  | 3.05E-07 | 0.00000271 |
| ILMN_2398184 | NCAM1     | NM_001076682.2 | 1.75 | 0.81 | 9.4   | 8.59  | 3.09E-07 | 0.00000274 |
| ILMN_1733366 | MAST1     | NM_014975.1    | 2.73 | 1.45 | 10.69 | 9.24  | 3.14E-07 | 0.00000279 |
| ILMN_2409754 | PRR5      | NM_001017530.1 | 1.96 | 0.97 | 8.92  | 7.95  | 3.16E-07 | 0.0000028  |

Supplementary Table 2

|              |           |                |      |      |       |       |           |            |
|--------------|-----------|----------------|------|------|-------|-------|-----------|------------|
| ILMN_2138019 | HEPACAM   | NM_152722.4    | 1.93 | 0.95 | 8.6   | 7.66  | 3.16E-07  | 0.0000028  |
| ILMN_1803279 | TMED5     | NM_016040.3    | 1.54 | 0.62 | 13.04 | 12.42 | 3.2E-07   | 0.00000283 |
| ILMN_1656840 | VPS13D    | NM_015378.2    | 2.55 | 1.35 | 9.47  | 8.12  | 3.24E-07  | 0.00000286 |
| ILMN_1705172 | SLC26A7   | NM_052832.2    | 1.83 | 0.87 | 9.33  | 8.46  | 3.26E-07  | 0.00000288 |
| ILMN_1802654 | GLT8D2    | NM_031302.2    | 2.17 | 1.12 | 8.75  | 7.63  | 3.28E-07  | 0.00000289 |
| ILMN_1661595 | C1ORF53   | NM_001024594.1 | 1.93 | 0.95 | 10.81 | 9.86  | 3.28E-07  | 0.00000289 |
| ILMN_1815673 | DKK3      | NM_013253.4    | 1.93 | 0.95 | 14.78 | 13.83 | 3.31E-07  | 0.00000291 |
| ILMN_2167416 | MR1       | NM_001531.1    | 1.85 | 0.89 | 8.38  | 7.49  | 3.32E-07  | 0.00000292 |
| ILMN_2276688 | DIXDC1    | NM_001037954.2 | 1.82 | 0.86 | 8.71  | 7.85  | 3.33E-07  | 0.00000293 |
| ILMN_1664537 | USP11     | NM_004651.3    | 1.58 | 0.66 | 12.81 | 12.15 | 3.33E-07  | 0.00000293 |
| ILMN_1720965 | TULP4     | NM_020245.3    | 1.62 | 0.7  | 11.88 | 11.18 | 3.34E-07  | 0.00000293 |
| ILMN_1684143 | NPTXR     | NM_058178.1    | 1.92 | 0.94 | 9.72  | 8.78  | 3.36E-07  | 0.00000295 |
| ILMN_2396672 | ABLIM1    | NM_001003407.1 | 1.78 | 0.83 | 11.67 | 10.83 | 3.39E-07  | 0.00000298 |
| ILMN_1722726 | RICS      | NM_014715.2    | 1.79 | 0.84 | 11.35 | 10.51 | 3.42E-07  | 0.000003   |
| ILMN_2166972 | BBS12     | NM_152618.2    | 1.65 | 0.72 | 9.68  | 8.95  | 3.43E-07  | 0.00000301 |
| ILMN_1781388 | PGM5      | NM_021965.3    | 2.07 | 1.05 | 10.31 | 9.25  | 3.43E-07  | 0.00000301 |
| ILMN_1699217 | C1ORF96   | NM_145257.2    | 1.95 | 0.96 | 9.17  | 8.2   | 3.44E-07  | 0.00000301 |
| ILMN_1765860 | DOCK11    | NM_144658.2    | 1.74 | 0.8  | 10.52 | 9.72  | 3.45E-07  | 0.00000302 |
| ILMN_1696702 | NEO1      | NM_002499.1    | 1.55 | 0.63 | 11.4  | 10.77 | 3.54E-07  | 0.00000309 |
| ILMN_2099301 | UNC84B    | NM_015374.1    | 1.49 | 0.58 | 13.68 | 13.1  | 3.56E-07  | 0.0000031  |
| ILMN_1737255 | LOC388886 | NM_207644.1    | 1.56 | 0.64 | 10.72 | 10.08 | 3.7E-07   | 0.00000321 |
| ILMN_1680434 | MAPK8IP1  | NM_005456.2    | 1.89 | 0.92 | 11.27 | 10.35 | 3.7E-07   | 0.00000321 |
| ILMN_1752075 | MYBPC1    | NM_002465.2    | 1.87 | 0.9  | 8.33  | 7.43  | 3.72E-07  | 0.00000322 |
| ILMN_1804339 | CAMK1G    | NM_020439.2    | 2.14 | 1.1  | 9.67  | 8.58  | 3.74E-07  | 0.00000324 |
| ILMN_1768640 | CRNKL1    | NM_016652.3    | 1.64 | 0.71 | 10.14 | 9.43  | 3.76E-07  | 0.00000325 |
| ILMN_2394362 | FAM123A   | NM_199138.1    | 1.79 | 0.84 | 12.44 | 11.6  | 3.76E-07  | 0.00000325 |
| ILMN_1733559 | CDC14B    | NM_003671.2    | 1.87 | 0.9  | 12.45 | 11.54 | 3.77E-07  | 0.00000326 |
| ILMN_2268156 | LFNG      | NM_001040168.1 | 1.62 | 0.7  | 8.38  | 7.68  | 3.8E-07   | 0.00000328 |
| ILMN_1786118 | FXYD7     | NM_022006.1    | 2.08 | 1.06 | 8.69  | 7.63  | 3.81E-07  | 0.00000329 |
| ILMN_1790555 | KIAA1505  | NM_020879.1    | 2.07 | 1.05 | 8.98  | 7.93  | 3.83E-07  | 0.00000331 |
| ILMN_1708340 | DAPK1     | NM_004938.1    | 1.88 | 0.91 | 10.92 | 10.01 | 3.85E-07  | 0.00000332 |
| ILMN_1755850 | ZNF350    | NM_021632.3    | 1.80 | 0.85 | 9.94  | 9.09  | 3.88E-07  | 0.00000335 |
| ILMN_1711361 | ZNF319    | NM_020807.1    | 1.58 | 0.66 | 11.62 | 10.95 | 3.9E-07   | 0.00000336 |
| ILMN_1749403 | TSPAN33   | NM_178562.2    | 1.78 | 0.83 | 11.01 | 10.18 | 3.96E-07  | 0.0000034  |
| ILMN_1739050 | PIPOX     | NM_016518.2    | 2.08 | 1.06 | 11.44 | 10.39 | 3.97E-07  | 0.00000341 |
| ILMN_1691483 | CLU       | NM_001831.2    | 1.97 | 0.98 | 9.1   | 8.12  | 3.99E-07  | 0.00000343 |
| ILMN_1698419 | NCOR2     | NM_006312.2    | 1.95 | 0.96 | 12.41 | 11.45 | 0.0000004 | 0.00000343 |
| ILMN_1809583 | CREBBP    | NM_004380.1    | 1.54 | 0.62 | 12.44 | 11.82 | 4.02E-07  | 0.00000345 |
| ILMN_1675406 | PPAPDC1B  | NM_032483.2    | 1.64 | 0.71 | 11.67 | 10.95 | 4.04E-07  | 0.00000347 |
| ILMN_2380163 | PTPRF     | NM_002840.3    | 1.69 | 0.76 | 13.18 | 12.42 | 4.19E-07  | 0.00000358 |
| ILMN_1776519 | RAP1GA1   | NM_002885.1    | 1.69 | 0.76 | 12.15 | 11.39 | 4.23E-07  | 0.00000361 |
| ILMN_1803925 | LOC400924 | NM_001013676.1 | 1.85 | 0.89 | 10.13 | 9.25  | 4.25E-07  | 0.00000363 |
| ILMN_2079386 | RPL22     | NM_000983.3    | 1.57 | 0.65 | 14.64 | 13.98 | 4.28E-07  | 0.00000365 |



Supplementary Table 2

|              |           |                |      |      |       |       |          |            |
|--------------|-----------|----------------|------|------|-------|-------|----------|------------|
| ILMN_2141941 | TOR1AIP1  | NM_015602.2    | 1.61 | 0.69 | 12.2  | 11.52 | 4.29E-07 | 0.00000365 |
| ILMN_1657754 | C1ORF82   | NM_024813.1    | 1.55 | 0.63 | 11.03 | 10.4  | 4.31E-07 | 0.00000367 |
| ILMN_1704376 | GLDN      | NM_181789.1    | 1.84 | 0.88 | 8.02  | 7.14  | 4.31E-07 | 0.00000367 |
| ILMN_1694268 | HES6      | NM_018645.3    | 1.52 | 0.6  | 13.4  | 12.8  | 4.32E-07 | 0.00000368 |
| ILMN_1679256 | AP3B2     | NM_004644.3    | 2.51 | 1.33 | 10.01 | 8.68  | 4.38E-07 | 0.00000372 |
| ILMN_2328986 | SREBF1    | NM_004176.3    | 1.82 | 0.86 | 10.86 | 10    | 4.4E-07  | 0.00000374 |
| ILMN_1672326 | PCDHA2    | NM_031495.1    | 2.08 | 1.06 | 8.58  | 7.52  | 4.42E-07 | 0.00000375 |
| ILMN_1734810 | PJA1      | NM_145119.2    | 1.53 | 0.61 | 10.51 | 9.9   | 4.46E-07 | 0.00000378 |
| ILMN_1673207 | KLF11     | NM_003597.4    | 2.27 | 1.18 | 10.09 | 8.9   | 4.49E-07 | 0.00000381 |
| ILMN_2350114 | TRIM13    | NM_001007278.1 | 1.72 | 0.78 | 10.99 | 10.22 | 4.52E-07 | 0.00000383 |
| ILMN_1661519 | KIAA0408  | NM_014702.3    | 1.51 | 0.59 | 9.43  | 8.84  | 4.56E-07 | 0.00000386 |
| ILMN_1746265 | SARM1     | NM_015077.1    | 1.55 | 0.63 | 11.24 | 10.61 | 4.69E-07 | 0.00000396 |
| ILMN_1777663 | TOP2B     | NM_001068.2    | 1.71 | 0.77 | 14.12 | 13.35 | 4.7E-07  | 0.00000397 |
| ILMN_2179717 | C9ORF61   | NM_004816.2    | 2.01 | 1.01 | 8.24  | 7.23  | 4.73E-07 | 0.00000399 |
| ILMN_1813704 | KIAA1199  | NM_018689.1    | 2.79 | 1.48 | 10.31 | 8.84  | 4.77E-07 | 0.00000402 |
| ILMN_1749070 | HLA-DPB1  | NM_002121.4    | 1.67 | 0.74 | 8.42  | 7.68  | 4.79E-07 | 0.00000403 |
| ILMN_2104141 | FGD5      | NM_152536.2    | 2.33 | 1.22 | 8.64  | 7.42  | 4.81E-07 | 0.00000404 |
| ILMN_2261876 | MDK       | NM_001012334.1 | 1.87 | 0.9  | 9.51  | 8.61  | 4.82E-07 | 0.00000406 |
| ILMN_2409290 | CCPG1     | NM_020739.2    | 2.30 | 1.2  | 8.98  | 7.78  | 4.91E-07 | 0.00000412 |
| ILMN_1696546 | FZD1      | NM_003505.1    | 1.65 | 0.72 | 9.69  | 8.97  | 4.92E-07 | 0.00000413 |
| ILMN_2325574 | CASC4     | NM_177974.1    | 1.73 | 0.79 | 12.65 | 11.86 | 5.06E-07 | 0.00000424 |
| ILMN_1715555 | DBP       | NM_001352.2    | 1.91 | 0.93 | 9.31  | 8.38  | 5.08E-07 | 0.00000425 |
| ILMN_2232854 | FAP       | NM_004460.2    | 1.80 | 0.85 | 7.82  | 6.97  | 5.13E-07 | 0.00000429 |
| ILMN_2268409 | VPS13B    | NM_017890.3    | 1.88 | 0.91 | 9.29  | 8.38  | 5.17E-07 | 0.00000432 |
| ILMN_2289924 | TRAK1     | NM_001042646.1 | 1.56 | 0.64 | 12.24 | 11.6  | 5.21E-07 | 0.00000435 |
| ILMN_1788213 | FRAT2     | NM_012083.2    | 1.53 | 0.61 | 10.82 | 10.21 | 5.21E-07 | 0.00000435 |
| ILMN_1699856 | RALGDS    | NM_006266.2    | 1.51 | 0.59 | 14.19 | 13.61 | 5.26E-07 | 0.00000439 |
| ILMN_2328224 | MADD      | NM_130473.1    | 1.62 | 0.7  | 9.78  | 9.08  | 5.31E-07 | 0.00000442 |
| ILMN_1671766 | F12       | NM_000505.2    | 1.66 | 0.73 | 11.09 | 10.36 | 5.33E-07 | 0.00000444 |
| ILMN_1752622 | PROX1     | NM_002763.3    | 1.68 | 0.75 | 11.48 | 10.74 | 5.43E-07 | 0.00000452 |
| ILMN_2397294 | PLCB4     | NM_000933.2    | 2.10 | 1.07 | 8.84  | 7.78  | 5.45E-07 | 0.00000453 |
| ILMN_2333107 | AES       | NM_198970.1    | 1.67 | 0.74 | 13.33 | 12.58 | 5.47E-07 | 0.00000454 |
| ILMN_1798288 | MOBKL2C   | NM_201403.1    | 1.56 | 0.64 | 10.47 | 9.83  | 5.48E-07 | 0.00000454 |
| ILMN_1690397 | DYNC111   | NM_004411.1    | 1.78 | 0.83 | 9.97  | 9.14  | 5.49E-07 | 0.00000455 |
| ILMN_1760051 | SOX5      | NM_152989.2    | 1.77 | 0.82 | 8.98  | 8.16  | 5.53E-07 | 0.00000458 |
| ILMN_1659782 | STK19     | NM_032454.1    | 1.68 | 0.75 | 12.07 | 11.32 | 5.55E-07 | 0.00000459 |
| ILMN_1717434 | DFNB31    | NM_015404.1    | 1.72 | 0.78 | 8.86  | 8.08  | 5.59E-07 | 0.00000462 |
| ILMN_2414878 | STXBP1    | NM_001032221.1 | 1.57 | 0.65 | 11.47 | 10.82 | 5.62E-07 | 0.00000465 |
| ILMN_1693233 | KIAA0513  | NM_014732.2    | 1.83 | 0.87 | 10.25 | 9.38  | 5.65E-07 | 0.00000467 |
| ILMN_1737343 | KIAA1961  | NM_133372.1    | 1.60 | 0.68 | 11.28 | 10.6  | 5.66E-07 | 0.00000467 |
| ILMN_2388142 | CD99L2    | NM_134445.2    | 1.51 | 0.59 | 14.25 | 13.67 | 5.69E-07 | 0.00000469 |
| ILMN_2115125 | CTGF      | NM_001901.2    | 1.54 | 0.62 | 14.04 | 13.42 | 5.79E-07 | 0.00000477 |
| ILMN_1797828 | C20ORF116 | NM_023935.1    | 1.55 | 0.63 | 12.64 | 12.01 | 5.81E-07 | 0.00000478 |

Supplementary Table 2

|              |           |                |      |      |       |       |          |            |
|--------------|-----------|----------------|------|------|-------|-------|----------|------------|
| ILMN_1812526 | TGFB2     | NM_003238.1    | 1.73 | 0.79 | 11.56 | 10.77 | 5.85E-07 | 0.00000481 |
| ILMN_1754579 | SYNE2     | NM_015180.3    | 2.36 | 1.24 | 9.21  | 7.97  | 5.92E-07 | 0.00000486 |
| ILMN_1804679 | MYST1     | NM_032188.1    | 1.64 | 0.71 | 11.47 | 10.76 | 5.98E-07 | 0.0000049  |
| ILMN_2294542 | IL17RD    | NM_001080973.1 | 1.75 | 0.81 | 8.4   | 7.58  | 5.98E-07 | 0.0000049  |
| ILMN_1786966 | ATRN1     | NM_207303.1    | 2.20 | 1.14 | 8.62  | 7.48  | 6.06E-07 | 0.00000496 |
| ILMN_1676983 | ZNF300    | NM_052860.1    | 1.66 | 0.73 | 10.11 | 9.38  | 6.07E-07 | 0.00000496 |
| ILMN_1679217 | C8ORF72   | NM_147189.1    | 1.53 | 0.61 | 11.8  | 11.18 | 6.07E-07 | 0.00000496 |
| ILMN_1758049 | NFIA      | NM_005595.1    | 2.57 | 1.36 | 12.98 | 11.62 | 6.08E-07 | 0.00000497 |
| ILMN_1715684 | LAMB3     | NM_000228.2    | 1.77 | 0.82 | 9.89  | 9.07  | 6.1E-07  | 0.00000498 |
| ILMN_1655167 | ZNF502    | NM_033210.3    | 1.60 | 0.68 | 10.05 | 9.37  | 6.11E-07 | 0.00000499 |
| ILMN_1688698 | ZFH1B     | NM_014795.2    | 2.33 | 1.22 | 11.12 | 9.9   | 6.16E-07 | 0.00000502 |
| ILMN_1703009 | FAM20C    | XM_928334.1    | 1.85 | 0.89 | 9.39  | 8.5   | 6.21E-07 | 0.00000506 |
| ILMN_1740772 | APBB3     | NM_006051.2    | 1.93 | 0.95 | 12.43 | 11.48 | 6.29E-07 | 0.00000512 |
| ILMN_1653496 | GLUL      | NM_001033044.1 | 2.01 | 1.01 | 8.75  | 7.74  | 6.32E-07 | 0.00000515 |
| ILMN_1656165 | USP9X     | NM_004652.3    | 1.51 | 0.59 | 12.59 | 12    | 6.33E-07 | 0.00000515 |
| ILMN_2385672 | ELN       | NM_001081754.1 | 2.19 | 1.13 | 9.32  | 8.19  | 6.43E-07 | 0.00000522 |
| ILMN_1750158 | ACOX1     | NM_004035.4    | 1.64 | 0.71 | 11.54 | 10.83 | 6.46E-07 | 0.00000525 |
| ILMN_1760121 | RRAGC     | NM_022157.2    | 1.53 | 0.61 | 12.17 | 11.56 | 6.47E-07 | 0.00000525 |
| ILMN_1670875 | PPM1D     | NM_003620.2    | 1.58 | 0.66 | 11.24 | 10.59 | 6.56E-07 | 0.00000532 |
| ILMN_2070896 | BMP2R     | NM_001204.5    | 2.06 | 1.04 | 11.82 | 10.78 | 6.58E-07 | 0.00000533 |
| ILMN_1714956 | PLA2G12A  | NM_030821.3    | 1.87 | 0.9  | 9.28  | 8.37  | 6.72E-07 | 0.00000543 |
| ILMN_1758825 | ABLIM2    | NM_032432.2    | 1.75 | 0.81 | 9.01  | 8.19  | 6.9E-07  | 0.00000557 |
| ILMN_2364272 | MBNL2     | NM_207304.1    | 2.45 | 1.29 | 11.8  | 10.51 | 7.04E-07 | 0.00000567 |
| ILMN_1665049 | KIAA1840  | NM_025137.2    | 1.77 | 0.82 | 11.93 | 11.11 | 7.1E-07  | 0.00000572 |
| ILMN_1745852 | WDR33     | NM_001006623.1 | 2.71 | 1.44 | 9.99  | 8.56  | 7.33E-07 | 0.00000589 |
| ILMN_1701918 | KARCA1    | NM_152366.3    | 1.66 | 0.73 | 11.72 | 10.99 | 7.36E-07 | 0.00000591 |
| ILMN_1669788 | NUDT14    | NM_177533.2    | 1.72 | 0.78 | 12.35 | 11.56 | 7.4E-07  | 0.00000593 |
| ILMN_1769388 | GJB2      | NM_004004.3    | 2.46 | 1.3  | 9.63  | 8.33  | 7.43E-07 | 0.00000596 |
| ILMN_2399264 | 6-SEP     | NM_145800.2    | 1.53 | 0.61 | 11.01 | 10.4  | 7.5E-07  | 0.000006   |
| ILMN_1651496 | HIST1H2BD | NM_138720.1    | 1.89 | 0.92 | 11.38 | 10.46 | 7.7E-07  | 0.00000615 |
| ILMN_1714349 | GLCE      | NM_015554.1    | 1.60 | 0.68 | 11.55 | 10.87 | 7.77E-07 | 0.00000619 |
| ILMN_1677404 | RAP2A     | NM_021033.4    | 1.56 | 0.64 | 13.5  | 12.86 | 7.78E-07 | 0.0000062  |
| ILMN_1720578 | PRAF2     | NM_007213.1    | 1.72 | 0.78 | 11.73 | 10.95 | 8.02E-07 | 0.00000637 |
| ILMN_1714181 | SBP1      | NM_178121.2    | 1.62 | 0.7  | 9.98  | 9.28  | 8.08E-07 | 0.00000642 |
| ILMN_2324672 | USF2      | NM_207291.1    | 1.51 | 0.59 | 11.86 | 11.26 | 8.13E-07 | 0.00000644 |
| ILMN_1658809 | SEZ6      | NM_178860.3    | 1.66 | 0.73 | 11.18 | 10.45 | 8.27E-07 | 0.00000655 |
| ILMN_1709237 | EPHX2     | NM_001979.4    | 1.69 | 0.76 | 10.03 | 9.27  | 8.3E-07  | 0.00000657 |
| ILMN_1744676 | ZNF179    | NM_007148.2    | 1.77 | 0.82 | 10.56 | 9.73  | 8.32E-07 | 0.00000659 |
| ILMN_1808157 | RPIB9     | NM_138290.1    | 1.93 | 0.95 | 9.82  | 8.87  | 8.35E-07 | 0.0000066  |
| ILMN_1731358 | ZNF532    | NM_018181.4    | 1.54 | 0.62 | 11.75 | 11.14 | 8.39E-07 | 0.00000663 |
| ILMN_1798395 | PIGH      | NM_004569.2    | 1.64 | 0.71 | 11.23 | 10.52 | 8.61E-07 | 0.00000679 |
| ILMN_1801845 | DNAL4     | NM_005740.2    | 1.60 | 0.68 | 12.91 | 12.23 | 8.69E-07 | 0.00000685 |
| ILMN_1741632 | RAB3IL1   | NM_013401.2    | 1.61 | 0.69 | 11.28 | 10.59 | 8.75E-07 | 0.00000689 |

Supplementary Table 2

|              |           |                |      |      |       |       |           |            |
|--------------|-----------|----------------|------|------|-------|-------|-----------|------------|
| ILMN_1681103 | AQP1      | NM_198098.1    | 1.93 | 0.95 | 9.06  | 8.11  | 8.8E-07   | 0.00000692 |
| ILMN_1752009 | NANOS1    | NM_199461.2    | 1.88 | 0.91 | 8.54  | 7.63  | 8.84E-07  | 0.00000695 |
| ILMN_2202239 | ZNF474    | NM_207317.1    | 1.84 | 0.88 | 8.31  | 7.43  | 8.84E-07  | 0.00000695 |
| ILMN_1659415 | MAP2K1IP1 | NM_021970.2    | 1.54 | 0.62 | 12.67 | 12.05 | 8.88E-07  | 0.00000698 |
| ILMN_2298818 | RPS29     | NM_001030001.1 | 2.06 | 1.04 | 12.85 | 11.81 | 9.21E-07  | 0.0000072  |
| ILMN_2295252 | C9ORF72   | NM_018325.1    | 2.10 | 1.07 | 8.56  | 7.49  | 9.26E-07  | 0.00000722 |
| ILMN_1664170 | CUGBP2    | NM_001025076.1 | 1.62 | 0.7  | 10.07 | 9.38  | 9.65E-07  | 0.00000751 |
| ILMN_2401344 | PPP2R2C   | NM_181876.2    | 1.75 | 0.81 | 8.39  | 7.57  | 9.76E-07  | 0.00000759 |
| ILMN_1654488 | UTX       | NM_021140.1    | 1.58 | 0.66 | 10.96 | 10.31 | 9.84E-07  | 0.00000764 |
| ILMN_1664502 | CRMP1     | NM_001014809.1 | 1.92 | 0.94 | 8.48  | 7.54  | 9.93E-07  | 0.0000077  |
| ILMN_2086095 | ID2       | NM_002166.4    | 2.20 | 1.14 | 12.35 | 11.21 | 9.95E-07  | 0.00000771 |
| ILMN_1687035 | TSRC1     | NM_025008.2    | 1.79 | 0.84 | 8.76  | 7.92  | 1.01E-06  | 0.0000078  |
| ILMN_1696127 | KIAA0240  | NM_015349.1    | 1.74 | 0.8  | 11.23 | 10.43 | 1.02E-06  | 0.00000787 |
| ILMN_1811957 | CAMSAP1   | NM_015447.1    | 1.62 | 0.7  | 12.41 | 11.71 | 1.03E-06  | 0.00000796 |
| ILMN_1738401 | FOXC1     | NM_001453.1    | 1.80 | 0.85 | 9.21  | 8.35  | 1.04E-06  | 0.00000802 |
| ILMN_1714383 | TPD52L1   | NM_001003396.1 | 1.49 | 0.58 | 10.8  | 10.22 | 1.04E-06  | 0.00000803 |
| ILMN_2320513 | APBB3     | NM_133173.2    | 1.77 | 0.82 | 10.95 | 10.13 | 1.05E-06  | 0.00000807 |
| ILMN_1745365 | PKNOX1    | NM_197976.1    | 1.56 | 0.64 | 11.09 | 10.45 | 1.05E-06  | 0.00000808 |
| ILMN_1684629 | C20ORF26  | NM_015585.2    | 2.03 | 1.02 | 8.4   | 7.38  | 1.06E-06  | 0.0000082  |
| ILMN_1700268 | QPRT      | NM_014298.3    | 1.67 | 0.74 | 12.63 | 11.89 | 1.06E-06  | 0.0000082  |
| ILMN_1654013 | C17ORF28  | NM_030630.1    | 2.03 | 1.02 | 8.99  | 7.97  | 1.07E-06  | 0.00000822 |
| ILMN_1718607 | TSPAN4    | NM_001025235.1 | 1.74 | 0.8  | 12.3  | 11.5  | 1.07E-06  | 0.00000822 |
| ILMN_2106902 | CHES1     | NM_005197.2    | 1.61 | 0.69 | 11.89 | 11.2  | 0.0000011 | 0.00000849 |
| ILMN_2212999 | KIF5C     | NM_004522.1    | 1.58 | 0.66 | 14.16 | 13.5  | 1.11E-06  | 0.00000849 |
| ILMN_1810199 | ASRGL1    | NM_025080.2    | 1.72 | 0.78 | 10.42 | 9.64  | 1.11E-06  | 0.00000853 |
| ILMN_1796075 | VPS41     | NM_014396.3    | 1.61 | 0.69 | 10.25 | 9.56  | 1.11E-06  | 0.00000855 |
| ILMN_2405400 | GRK4      | NM_001004057.1 | 1.59 | 0.67 | 9.94  | 9.27  | 1.12E-06  | 0.00000859 |
| ILMN_1789436 | FLJ20054  | NM_019049.1    | 1.56 | 0.64 | 10    | 9.36  | 1.15E-06  | 0.00000879 |
| ILMN_1777853 | OACT2     | XM_938724.1    | 1.85 | 0.89 | 10.74 | 9.84  | 1.16E-06  | 0.00000888 |
| ILMN_1806705 | ASB6      | NM_177999.1    | 1.75 | 0.81 | 10.73 | 9.92  | 1.16E-06  | 0.00000888 |
| ILMN_1706664 | FAM80A    | NM_173642.1    | 1.78 | 0.83 | 9.84  | 9.01  | 1.18E-06  | 0.00000898 |
| ILMN_1797861 | IL6ST     | NM_002184.2    | 2.00 | 1    | 9.63  | 8.63  | 1.18E-06  | 0.00000899 |
| ILMN_1780302 | DYNC1H1   | NM_001376.2    | 1.74 | 0.8  | 12.47 | 11.66 | 1.19E-06  | 0.00000905 |
| ILMN_2108735 | EEF1A2    | NM_001958.2    | 1.53 | 0.61 | 12.21 | 11.6  | 1.19E-06  | 0.00000907 |
| ILMN_1741422 | FUT8      | NM_178154.1    | 1.82 | 0.86 | 11.34 | 10.47 | 1.19E-06  | 0.00000908 |
| ILMN_1694847 | TERF1     | NM_017489.1    | 1.68 | 0.75 | 11.67 | 10.92 | 0.0000012 | 0.0000091  |
| ILMN_1814526 | ADD3      | NM_016824.3    | 2.20 | 1.14 | 12.32 | 11.18 | 0.0000012 | 0.00000913 |
| ILMN_2255579 | RAB37     | NM_175738.3    | 1.87 | 0.9  | 8.22  | 7.32  | 0.0000012 | 0.00000913 |
| ILMN_1735275 | WDSUB1    | NM_152528.1    | 1.71 | 0.77 | 10.49 | 9.72  | 1.23E-06  | 0.0000093  |
| ILMN_2136177 | CNOT6     | NM_015455.3    | 1.58 | 0.66 | 12.21 | 11.54 | 1.24E-06  | 0.00000939 |
| ILMN_1806448 | NTNG2     | NM_032536.1    | 1.58 | 0.66 | 8.81  | 8.14  | 1.24E-06  | 0.0000094  |
| ILMN_1685122 | COL9A2    | NM_001852.3    | 1.66 | 0.73 | 9.45  | 8.72  | 1.24E-06  | 0.00000941 |
| ILMN_2408877 | MLL3      | NM_170606.2    | 2.11 | 1.08 | 9.91  | 8.84  | 1.25E-06  | 0.00000944 |

Supplementary Table 2

|              |           |                |      |      |       |       |           |            |
|--------------|-----------|----------------|------|------|-------|-------|-----------|------------|
| ILMN_2358647 | FBXO21    | NM_033624.2    | 1.56 | 0.64 | 12.12 | 11.49 | 1.25E-06  | 0.00000948 |
| ILMN_2379626 | PCDH9     | NM_020403.3    | 1.92 | 0.94 | 8.55  | 7.61  | 1.26E-06  | 0.00000951 |
| ILMN_1814790 | SHANK2    | NM_012309.1    | 1.71 | 0.77 | 8.83  | 8.06  | 1.27E-06  | 0.00000957 |
| ILMN_1782441 | CDKL2     | NM_003948.2    | 1.87 | 0.9  | 8.27  | 7.37  | 1.27E-06  | 0.00000957 |
| ILMN_1785380 | SLC1A2    | NM_004171.2    | 2.14 | 1.1  | 11.51 | 10.42 | 0.0000013 | 0.00000978 |
| ILMN_1764694 | KIAA1559  | NM_020917.1    | 1.88 | 0.91 | 9.53  | 8.62  | 0.0000013 | 0.0000098  |
| ILMN_1719622 | RABEP1    | NM_004703.3    | 1.62 | 0.7  | 12.53 | 11.83 | 1.32E-06  | 0.00000991 |
| ILMN_1651987 | C6ORF129  | NM_138493.1    | 1.72 | 0.78 | 13.67 | 12.89 | 1.36E-06  | 0.0000102  |
| ILMN_2282077 | MIB2      | NM_080875.1    | 1.54 | 0.62 | 10.97 | 10.35 | 1.37E-06  | 0.0000102  |
| ILMN_2411897 | KLF10     | NM_005655.1    | 1.57 | 0.65 | 10.28 | 9.63  | 1.39E-06  | 0.0000104  |
| ILMN_1696757 | TTC14     | NM_133462.1    | 1.58 | 0.66 | 11.2  | 10.54 | 1.39E-06  | 0.0000104  |
| ILMN_1762284 | FLJ25084  | NM_152792.1    | 1.87 | 0.9  | 8.89  | 7.98  | 1.41E-06  | 0.0000105  |
| ILMN_1748057 | LASS4     | NM_024552.1    | 1.68 | 0.75 | 10.05 | 9.3   | 1.41E-06  | 0.0000106  |
| ILMN_2157510 | BLOC1S1   | NM_001487.1    | 1.83 | 0.87 | 13.1  | 12.22 | 1.44E-06  | 0.0000107  |
| ILMN_2186806 | HLA-F     | NM_018950.1    | 1.59 | 0.67 | 11.59 | 10.93 | 1.45E-06  | 0.0000108  |
| ILMN_2261882 | KIAA0368  | NM_001080398.1 | 1.52 | 0.6  | 10.19 | 9.59  | 1.45E-06  | 0.0000108  |
| ILMN_1731135 | RAB11B    | NM_004218.1    | 1.56 | 0.64 | 10.08 | 9.45  | 1.48E-06  | 0.000011   |
| ILMN_1702229 | CECR6     | NM_031890.2    | 1.82 | 0.86 | 10.92 | 10.06 | 1.51E-06  | 0.0000112  |
| ILMN_1751120 | HIST1H4H  | NM_003543.3    | 1.66 | 0.73 | 9.93  | 9.19  | 1.52E-06  | 0.0000112  |
| ILMN_2130525 | TSPAN13   | NM_014399.3    | 2.28 | 1.19 | 9.52  | 8.33  | 1.52E-06  | 0.0000113  |
| ILMN_1772148 | SULT1C2   | NM_006588.2    | 1.77 | 0.82 | 10.1  | 9.28  | 1.56E-06  | 0.0000115  |
| ILMN_1711208 | CELSR2    | NM_001408.1    | 2.08 | 1.06 | 11.7  | 10.64 | 1.57E-06  | 0.0000116  |
| ILMN_1781580 | BRI3      | NM_015379.3    | 1.54 | 0.62 | 13.62 | 13.01 | 1.57E-06  | 0.0000116  |
| ILMN_2377900 | MAP1B     | NM_032010.1    | 1.59 | 0.67 | 14.35 | 13.68 | 1.57E-06  | 0.0000116  |
| ILMN_1746883 | SAT2      | NM_133491.2    | 1.59 | 0.67 | 12.45 | 11.77 | 1.58E-06  | 0.0000117  |
| ILMN_1780057 | RENBP     | NM_002910.4    | 1.78 | 0.83 | 11.8  | 10.96 | 1.58E-06  | 0.0000117  |
| ILMN_1700432 | ITPKB     | NM_002221.2    | 1.61 | 0.69 | 12.2  | 11.51 | 1.61E-06  | 0.0000118  |
| ILMN_1764813 | B3GTL     | NM_194318.2    | 1.75 | 0.81 | 10.73 | 9.92  | 1.61E-06  | 0.0000119  |
| ILMN_1751453 | ABCC9     | NM_020297.1    | 2.97 | 1.57 | 9.02  | 7.44  | 1.62E-06  | 0.0000119  |
| ILMN_1686889 | LOC619208 | NM_001033564.1 | 1.69 | 0.76 | 9.82  | 9.06  | 1.63E-06  | 0.000012   |
| ILMN_2058782 | IFI27     | NM_005532.3    | 1.66 | 0.73 | 8.59  | 7.86  | 1.64E-06  | 0.0000121  |
| ILMN_1728305 | PUM2      | NM_015317.1    | 1.55 | 0.63 | 12.58 | 11.95 | 1.67E-06  | 0.0000122  |
| ILMN_1785290 | DOK6      | NM_152721.2    | 1.54 | 0.62 | 9.84  | 9.23  | 1.67E-06  | 0.0000123  |
| ILMN_1742330 | PLXNB1    | NM_002673.3    | 1.74 | 0.8  | 12.18 | 11.38 | 1.68E-06  | 0.0000123  |
| ILMN_1669599 | DENND4C   | NM_017925.3    | 1.55 | 0.63 | 11.18 | 10.54 | 1.68E-06  | 0.0000123  |
| ILMN_1803018 | KIFC2     | NM_145754.2    | 1.62 | 0.7  | 10.91 | 10.21 | 0.0000017 | 0.0000124  |
| ILMN_1808783 | STRBP     | NM_018387.2    | 1.67 | 0.74 | 10.32 | 9.58  | 1.76E-06  | 0.0000128  |
| ILMN_1751471 | MLC1      | NM_015166.2    | 1.85 | 0.89 | 12.32 | 11.43 | 1.78E-06  | 0.0000129  |
| ILMN_1665964 | GAB2      | NM_080491.1    | 1.59 | 0.67 | 11.35 | 10.68 | 1.79E-06  | 0.0000131  |
| ILMN_1710268 | ZNF659    | NM_024697.1    | 1.56 | 0.64 | 11.9  | 11.27 | 0.0000018 | 0.0000131  |
| ILMN_2279961 | LAMP2     | NM_013995.1    | 2.22 | 1.15 | 13.84 | 12.69 | 1.83E-06  | 0.0000133  |
| ILMN_1667298 | LOC201229 | XM_942296.1    | 2.14 | 1.1  | 9.64  | 8.54  | 1.85E-06  | 0.0000134  |
| ILMN_1707350 | TUSC1     | NM_001004125.1 | 1.56 | 0.64 | 10.31 | 9.67  | 1.88E-06  | 0.0000136  |

Supplementary Table 2

|              |           |                |      |      |       |       |           |           |
|--------------|-----------|----------------|------|------|-------|-------|-----------|-----------|
| ILMN_1696615 | CA8       | NM_004056.4    | 2.28 | 1.19 | 8.52  | 7.34  | 0.000019  | 0.0000137 |
| ILMN_2404063 | APP       | NM_201414.1    | 1.80 | 0.85 | 14.15 | 13.3  | 1.92E-06  | 0.0000139 |
| ILMN_1658677 | DTX3      | NM_178502.2    | 1.68 | 0.75 | 11.67 | 10.92 | 1.93E-06  | 0.0000139 |
| ILMN_1778991 | NFIB      | NM_005596.1    | 1.54 | 0.62 | 14.01 | 13.39 | 1.94E-06  | 0.000014  |
| ILMN_2228196 | C6ORF170  | NM_152730.4    | 1.59 | 0.67 | 10.42 | 9.75  | 1.98E-06  | 0.0000142 |
| ILMN_1784287 | TGFBR3    | NM_003243.2    | 1.89 | 0.92 | 9.38  | 8.46  | 1.98E-06  | 0.0000143 |
| ILMN_1695947 | SCN4B     | NM_174934.1    | 1.60 | 0.68 | 10.73 | 10.05 | 1.99E-06  | 0.0000143 |
| ILMN_2362982 | ARID4B    | NM_016374.5    | 1.56 | 0.64 | 10.42 | 9.78  | 2.01E-06  | 0.0000144 |
| ILMN_1659599 | ADC       | NM_052998.2    | 1.85 | 0.89 | 10.12 | 9.23  | 2.01E-06  | 0.0000145 |
| ILMN_2047885 | PCDHB9    | NM_019119.3    | 1.95 | 0.96 | 9.26  | 8.29  | 2.07E-06  | 0.0000148 |
| ILMN_1703244 | MAP1LC3B  | NM_022818.3    | 1.53 | 0.61 | 13.38 | 12.77 | 2.08E-06  | 0.0000149 |
| ILMN_1748245 | LRRTM2    | NM_015564.1    | 1.91 | 0.93 | 9.9   | 8.97  | 2.09E-06  | 0.0000149 |
| ILMN_1786021 | PRKAB2    | NM_005399.3    | 1.62 | 0.7  | 10.73 | 10.03 | 2.13E-06  | 0.0000152 |
| ILMN_1706960 | KIAA1217  | NM_019590.2    | 1.61 | 0.69 | 8.85  | 8.16  | 2.15E-06  | 0.0000153 |
| ILMN_1776283 | LGALS12   | NM_033101.2    | 2.10 | 1.07 | 8.92  | 7.86  | 2.15E-06  | 0.0000153 |
| ILMN_2153916 | HSPA2     | NM_021979.2    | 2.23 | 1.16 | 9.81  | 8.66  | 2.16E-06  | 0.0000154 |
| ILMN_1768732 | SPAG16    | NM_001025436.1 | 1.64 | 0.71 | 10.69 | 9.98  | 2.17E-06  | 0.0000154 |
| ILMN_1683234 | DNAJC1    | NM_022365.2    | 2.10 | 1.07 | 8.57  | 7.5   | 2.18E-06  | 0.0000155 |
| ILMN_1805996 | SIN3A     | NM_015477.1    | 1.53 | 0.61 | 12.56 | 11.95 | 0.0000022 | 0.0000156 |
| ILMN_1681998 | AP2B1     | NM_001282.2    | 1.58 | 0.66 | 11.43 | 10.77 | 2.21E-06  | 0.0000157 |
| ILMN_1801866 | BRWD1     | NM_033656.2    | 2.08 | 1.06 | 9.46  | 8.4   | 2.26E-06  | 0.000016  |
| ILMN_2216815 | MAP7      | NM_003980.3    | 2.71 | 1.44 | 9.19  | 7.74  | 2.26E-06  | 0.000016  |
| ILMN_1801476 | CDS1      | NM_001263.2    | 1.97 | 0.98 | 8.08  | 7.1   | 2.29E-06  | 0.0000162 |
| ILMN_1651771 | RRAGB     | NM_016656.2    | 2.71 | 1.44 | 9.12  | 7.68  | 2.29E-06  | 0.0000162 |
| ILMN_1690392 | COMMD3    | NM_012071.2    | 1.52 | 0.6  | 14.33 | 13.73 | 2.29E-06  | 0.0000162 |
| ILMN_2168766 | BAGE2     | NM_182482.1    | 1.65 | 0.72 | 8.26  | 7.54  | 0.0000023 | 0.0000163 |
| ILMN_1799589 | NOXA1     | NM_006647.1    | 1.82 | 0.86 | 9.56  | 8.7   | 2.32E-06  | 0.0000164 |
| ILMN_1801588 | FN3K      | NM_022158.2    | 1.49 | 0.58 | 8.6   | 8.02  | 2.32E-06  | 0.0000164 |
| ILMN_1755741 | DACH1     | NM_080759.3    | 1.79 | 0.84 | 12.01 | 11.18 | 2.35E-06  | 0.0000166 |
| ILMN_2199947 | REV3L     | NM_002912.1    | 2.19 | 1.13 | 10.21 | 9.08  | 2.38E-06  | 0.0000168 |
| ILMN_1771728 | PXMP4     | NM_007238.3    | 1.61 | 0.69 | 9.87  | 9.18  | 2.41E-06  | 0.000017  |
| ILMN_1746784 | FLJ30046  | NM_144595.2    | 2.01 | 1.01 | 13.24 | 12.23 | 2.41E-06  | 0.000017  |
| ILMN_1803779 | AP2A2     | NM_012305.2    | 1.72 | 0.78 | 10.73 | 9.95  | 2.43E-06  | 0.0000171 |
| ILMN_1737965 | ELOVL4    | NM_022726.2    | 1.55 | 0.63 | 10.88 | 10.25 | 2.46E-06  | 0.0000173 |
| ILMN_2099487 | LOC201229 | NM_001076680.1 | 1.79 | 0.84 | 8.68  | 7.84  | 2.48E-06  | 0.0000174 |
| ILMN_1663068 | MGC33556  | NM_001004307.1 | 1.65 | 0.72 | 9.03  | 8.31  | 2.49E-06  | 0.0000175 |
| ILMN_2095759 | OGFRL1    | NM_024576.3    | 1.61 | 0.69 | 9.38  | 8.69  | 2.55E-06  | 0.0000178 |
| ILMN_2073592 | CAND2     | NM_012298.1    | 1.53 | 0.61 | 11.68 | 11.07 | 2.55E-06  | 0.0000179 |
| ILMN_1702226 | C21ORF34  | NM_001005732.1 | 1.66 | 0.73 | 9.51  | 8.79  | 2.56E-06  | 0.0000179 |
| ILMN_1795435 | ZNF264    | NM_003417.2    | 1.59 | 0.67 | 10.95 | 10.28 | 2.61E-06  | 0.0000182 |
| ILMN_1690621 | MASS1     | NM_032119.1    | 2.06 | 1.04 | 9.19  | 8.15  | 2.61E-06  | 0.0000182 |
| ILMN_1711015 | CRYAA     | NM_000394.2    | 1.71 | 0.77 | 8.37  | 7.6   | 2.65E-06  | 0.0000184 |
| ILMN_2365223 | NEK11     | NM_145910.1    | 1.61 | 0.69 | 9.93  | 9.23  | 2.67E-06  | 0.0000186 |

Supplementary Table 2

|              |           |                |      |      |       |       |           |           |
|--------------|-----------|----------------|------|------|-------|-------|-----------|-----------|
| ILMN_1769195 | CAST1     | NM_015576.1    | 1.92 | 0.94 | 8.44  | 7.5   | 2.67E-06  | 0.0000186 |
| ILMN_1709681 | GABRB3    | NM_000814.3    | 1.60 | 0.68 | 12.32 | 11.64 | 2.69E-06  | 0.0000187 |
| ILMN_1716728 | C6ORF64   | NM_018322.1    | 1.55 | 0.63 | 10.39 | 9.76  | 0.0000027 | 0.0000188 |
| ILMN_2252495 | UBE2L6    | NM_198183.1    | 1.71 | 0.77 | 8.52  | 7.75  | 2.71E-06  | 0.0000188 |
| ILMN_2095273 | KIAA1407  | NM_020817.1    | 1.67 | 0.74 | 9.68  | 8.94  | 2.74E-06  | 0.000019  |
| ILMN_1708016 | C20ORF108 | NM_080821.1    | 2.06 | 1.04 | 12.47 | 11.43 | 2.75E-06  | 0.0000191 |
| ILMN_1741684 | SMPD1     | NM_000543.3    | 1.56 | 0.64 | 10.96 | 10.31 | 2.75E-06  | 0.0000191 |
| ILMN_1663897 | ALS2CR16  | NM_205543.1    | 1.68 | 0.75 | 8.51  | 7.76  | 2.79E-06  | 0.0000193 |
| ILMN_2045994 | SEPW1     | NM_003009.2    | 1.61 | 0.69 | 13.56 | 12.88 | 0.0000028 | 0.0000194 |
| ILMN_1667030 | HSBP1     | NM_001537.2    | 1.52 | 0.6  | 14.75 | 14.15 | 2.82E-06  | 0.0000195 |
| ILMN_1703686 | BRF1      | NM_145696.1    | 1.56 | 0.64 | 10.67 | 10.03 | 2.83E-06  | 0.0000196 |
| ILMN_2094351 | NUDT9P1   | NR_002779.1    | 1.85 | 0.89 | 8.14  | 7.25  | 2.85E-06  | 0.0000197 |
| ILMN_1671076 | BAI3      | NM_001704.1    | 1.54 | 0.62 | 11.49 | 10.87 | 2.89E-06  | 0.00002   |
| ILMN_1736015 | PHF17     | NM_024900.2    | 1.56 | 0.64 | 10.81 | 10.17 | 0.0000029 | 0.00002   |
| ILMN_1724350 | TRIM36    | NM_018700.3    | 1.72 | 0.78 | 9.03  | 8.26  | 2.92E-06  | 0.0000201 |
| ILMN_1739199 | LOC349338 | NM_182905.1    | 1.58 | 0.66 | 10    | 9.34  | 2.92E-06  | 0.0000201 |
| ILMN_1660549 | GPR177    | NM_001002292.1 | 2.16 | 1.11 | 10.72 | 9.61  | 2.95E-06  | 0.0000203 |
| ILMN_1730639 | SLC22A15  | NM_018420.1    | 1.62 | 0.7  | 8.28  | 7.58  | 2.97E-06  | 0.0000205 |
| ILMN_1659923 | GNAQ      | NM_002072.2    | 1.54 | 0.62 | 12.3  | 11.67 | 3.01E-06  | 0.0000207 |
| ILMN_1775549 | PRSS27    | NM_031948.3    | 1.99 | 0.99 | 8.94  | 7.95  | 3.02E-06  | 0.0000207 |
| ILMN_1767135 | SOS1      | NM_005633.2    | 1.60 | 0.68 | 10.04 | 9.37  | 3.03E-06  | 0.0000208 |
| ILMN_1666206 | GSDML     | NM_018530.1    | 1.56 | 0.64 | 9.54  | 8.9   | 3.05E-06  | 0.0000209 |
| ILMN_1760909 | FGF19     | NM_005117.2    | 1.83 | 0.87 | 9.2   | 8.33  | 3.06E-06  | 0.000021  |
| ILMN_1681757 | FAM80B    | NM_020734.1    | 2.07 | 1.05 | 9.47  | 8.42  | 3.09E-06  | 0.0000212 |
| ILMN_2394561 | IRF2BP2   | NM_182972.1    | 1.58 | 0.66 | 11.28 | 10.63 | 0.0000031 | 0.0000212 |
| ILMN_2337923 | TPD52L1   | NM_001003397.1 | 1.59 | 0.67 | 10.92 | 10.26 | 3.11E-06  | 0.0000213 |
| ILMN_1763704 | RGS11     | NM_183337.1    | 1.79 | 0.84 | 11.96 | 11.12 | 3.11E-06  | 0.0000213 |
| ILMN_1804737 | RAVER2    | NM_018211.2    | 1.51 | 0.59 | 10.72 | 10.13 | 3.12E-06  | 0.0000214 |
| ILMN_1727553 | LOC63920  | NM_022090.3    | 1.52 | 0.6  | 10.46 | 9.87  | 3.13E-06  | 0.0000214 |
| ILMN_2180352 | DIP2B     | NM_173602.2    | 1.60 | 0.68 | 13.18 | 12.51 | 3.14E-06  | 0.0000215 |
| ILMN_2252813 | TAF5L     | NM_014409.3    | 2.03 | 1.02 | 9.46  | 8.44  | 3.16E-06  | 0.0000216 |
| ILMN_2115340 | HIST2H4A  | NM_003548.2    | 1.79 | 0.84 | 9.93  | 9.09  | 3.19E-06  | 0.0000217 |
| ILMN_2345142 | SULF2     | NM_018837.2    | 1.53 | 0.61 | 11.59 | 10.98 | 0.0000032 | 0.0000218 |
| ILMN_1702517 | CDON      | NM_016952.3    | 1.88 | 0.91 | 8.56  | 7.65  | 3.21E-06  | 0.0000218 |
| ILMN_1693762 | LRRC48    | NM_031294.2    | 1.68 | 0.75 | 8.31  | 7.56  | 3.22E-06  | 0.0000219 |
| ILMN_1658639 | LOC283537 | NM_181785.1    | 1.78 | 0.83 | 9.54  | 8.71  | 3.24E-06  | 0.0000221 |
| ILMN_2211065 | TMEM91    | NM_001042595.1 | 2.14 | 1.1  | 10.44 | 9.34  | 0.0000033 | 0.0000224 |
| ILMN_1811616 | KIAA1706  | NM_030636.2    | 1.52 | 0.6  | 10.23 | 9.63  | 3.34E-06  | 0.0000227 |
| ILMN_1683377 | MDH1B     | NM_206892.1    | 1.66 | 0.73 | 8.97  | 8.25  | 3.36E-06  | 0.0000228 |
| ILMN_1802205 | RHOB      | NM_004040.2    | 1.66 | 0.73 | 11.79 | 11.06 | 3.36E-06  | 0.0000228 |
| ILMN_2287653 | PLAG1     | NM_002655.1    | 1.82 | 0.86 | 8.01  | 7.15  | 3.43E-06  | 0.0000232 |
| ILMN_1703408 | FZD3      | NM_017412.2    | 1.64 | 0.71 | 13.28 | 12.57 | 3.44E-06  | 0.0000233 |
| ILMN_2089656 | C1ORF107  | NM_014388.5    | 2.01 | 1.01 | 9.63  | 8.62  | 3.51E-06  | 0.0000238 |

Supplementary Table 2

|              |          |                |      |      |       |       |           |           |
|--------------|----------|----------------|------|------|-------|-------|-----------|-----------|
| ILMN_1770927 | KIAA1026 | NM_015209.1    | 1.61 | 0.69 | 10.07 | 9.38  | 3.52E-06  | 0.0000238 |
| ILMN_1686985 | MTM1     | NM_000252.1    | 1.52 | 0.6  | 11.19 | 10.59 | 3.55E-06  | 0.000024  |
| ILMN_2098616 | AXIIR    | NM_001014279.1 | 1.64 | 0.71 | 9.23  | 8.52  | 3.55E-06  | 0.000024  |
| ILMN_2149766 | APPBP2   | NM_006380.2    | 1.51 | 0.59 | 12.9  | 12.3  | 0.0000036 | 0.0000243 |
| ILMN_1775042 | WDR69    | NM_178821.1    | 1.74 | 0.8  | 8.15  | 7.35  | 3.68E-06  | 0.0000248 |
| ILMN_1676449 | SLIT2    | NM_004787.1    | 1.96 | 0.97 | 10.99 | 10.02 | 3.72E-06  | 0.000025  |
| ILMN_1665775 | MOSC2    | NM_017898.3    | 1.49 | 0.58 | 10.22 | 9.64  | 3.76E-06  | 0.0000252 |
| ILMN_2287535 | ACCN4    | NM_018674.3    | 1.67 | 0.74 | 8.13  | 7.39  | 0.0000038 | 0.0000255 |
| ILMN_2410182 | VMD2L3   | NM_152439.1    | 1.51 | 0.59 | 10.49 | 9.89  | 3.81E-06  | 0.0000256 |
| ILMN_2397776 | ASB6     | NM_177999.1    | 1.82 | 0.86 | 10.61 | 9.75  | 3.82E-06  | 0.0000256 |
| ILMN_2394897 | ACCN4    | NM_018674.3    | 1.77 | 0.82 | 8.72  | 7.9   | 3.85E-06  | 0.0000258 |
| ILMN_1755990 | LOC92270 | NM_001017971.1 | 1.60 | 0.68 | 9.59  | 8.91  | 3.94E-06  | 0.0000264 |
| ILMN_1745374 | IFI35    | NM_005533.2    | 1.73 | 0.79 | 11.27 | 10.48 | 3.99E-06  | 0.0000267 |
| ILMN_2263718 | SPAG9    | NM_003971.3    | 1.79 | 0.84 | 13.02 | 12.18 | 4.03E-06  | 0.0000269 |
| ILMN_1793378 | KCTD16   | NM_020768.1    | 2.04 | 1.03 | 8.47  | 7.44  | 4.03E-06  | 0.0000269 |
| ILMN_1700515 | C17ORF58 | XM_942508.1    | 1.53 | 0.61 | 12.47 | 11.85 | 4.04E-06  | 0.0000269 |
| ILMN_1661335 | SPTBN1   | NM_003128.1    | 1.85 | 0.89 | 12.42 | 11.53 | 4.04E-06  | 0.000027  |
| ILMN_1708508 | PPM1E    | NM_014906.3    | 1.57 | 0.65 | 11.15 | 10.5  | 4.09E-06  | 0.0000272 |
| ILMN_1738237 | HS1BP3   | NM_022460.3    | 1.73 | 0.79 | 10.7  | 9.91  | 0.0000041 | 0.0000273 |
| ILMN_2277419 | MGC15523 | NM_001037984.1 | 1.58 | 0.66 | 10.27 | 9.61  | 4.19E-06  | 0.0000279 |
| ILMN_2206141 | BAGE5    | NM_182484.1    | 1.69 | 0.76 | 8.72  | 7.96  | 4.23E-06  | 0.0000281 |
| ILMN_1736165 | MLL3     | NM_021230.1    | 1.91 | 0.93 | 9.81  | 8.88  | 4.27E-06  | 0.0000284 |
| ILMN_1702231 | C1ORF54  | NM_024579.1    | 1.69 | 0.76 | 13.04 | 12.29 | 4.29E-06  | 0.0000285 |
| ILMN_1663131 | LYST     | NM_001005736.1 | 1.62 | 0.7  | 10.22 | 9.52  | 4.34E-06  | 0.0000288 |
| ILMN_1718633 | LRP5L    | NM_182492.1    | 1.71 | 0.77 | 8.83  | 8.06  | 4.35E-06  | 0.0000288 |
| ILMN_2269900 | PACRG    | NM_001080379.1 | 1.80 | 0.85 | 9.21  | 8.35  | 4.44E-06  | 0.0000294 |
| ILMN_1783671 | PCDHB12  | NM_018932.3    | 2.10 | 1.07 | 9.38  | 8.31  | 0.0000045 | 0.0000297 |
| ILMN_1658513 | IQSEC2   | NM_015075.1    | 1.56 | 0.64 | 8.96  | 8.32  | 4.56E-06  | 0.0000301 |
| ILMN_1755727 | JARID1B  | NM_006618.3    | 1.60 | 0.68 | 13.53 | 12.85 | 4.61E-06  | 0.0000304 |
| ILMN_1815500 | ITPR3    | NM_002224.1    | 1.66 | 0.73 | 10.09 | 9.37  | 4.67E-06  | 0.0000308 |
| ILMN_1699254 | PLEKHH1  | NM_020715.1    | 1.82 | 0.86 | 9.74  | 8.88  | 4.68E-06  | 0.0000309 |
| ILMN_2404407 | ABAT     | NM_000663.3    | 1.97 | 0.98 | 9.13  | 8.15  | 4.73E-06  | 0.0000311 |
| ILMN_1815366 | FLJ21865 | NM_022759.1    | 1.59 | 0.67 | 9.93  | 9.26  | 4.79E-06  | 0.0000315 |
| ILMN_1770388 | VPS39    | NM_015289.2    | 1.54 | 0.62 | 10.87 | 10.25 | 4.83E-06  | 0.0000317 |
| ILMN_1698038 | FLJ22374 | NM_032222.1    | 1.69 | 0.76 | 9     | 8.24  | 4.88E-06  | 0.000032  |
| ILMN_1742949 | PDZRN3   | NM_015009.1    | 1.71 | 0.77 | 8.9   | 8.13  | 0.0000049 | 0.0000322 |
| ILMN_1768510 | MAN2B2   | NM_015274.1    | 1.54 | 0.62 | 11.55 | 10.93 | 4.96E-06  | 0.0000325 |
| ILMN_1792409 | AMOT     | NM_133265.2    | 1.49 | 0.58 | 11.97 | 11.39 | 4.96E-06  | 0.0000325 |
| ILMN_2120247 | SLC2A10  | NM_030777.3    | 1.59 | 0.67 | 11.73 | 11.05 | 4.99E-06  | 0.0000327 |
| ILMN_1791306 | C9ORF103 | NM_001001551.1 | 1.62 | 0.7  | 10.44 | 9.74  | 5.06E-06  | 0.0000331 |
| ILMN_2379240 | RGS11    | NM_183337.1    | 1.52 | 0.6  | 9.33  | 8.73  | 5.06E-06  | 0.0000331 |
| ILMN_1760062 | IFI44    | NM_006417.2    | 1.59 | 0.67 | 10.76 | 10.09 | 5.18E-06  | 0.0000337 |
| ILMN_1680390 | GCNT2    | NM_001491.2    | 1.64 | 0.71 | 10.35 | 9.64  | 5.27E-06  | 0.0000343 |

Supplementary Table 2

|              |           |                |      |      |       |       |           |           |
|--------------|-----------|----------------|------|------|-------|-------|-----------|-----------|
| ILMN_1773620 | SMARCC2   | NM_003075.2    | 1.51 | 0.59 | 13.28 | 12.7  | 5.28E-06  | 0.0000343 |
| ILMN_1676296 | PPAP2A    | NM_176895.1    | 1.65 | 0.72 | 9.09  | 8.37  | 5.39E-06  | 0.000035  |
| ILMN_1734991 | PPM1B     | NM_001033556.1 | 1.93 | 0.95 | 9.05  | 8.1   | 5.47E-06  | 0.0000355 |
| ILMN_2211728 | GUCA1B    | NM_002098.3    | 1.59 | 0.67 | 9     | 8.33  | 5.53E-06  | 0.0000358 |
| ILMN_1767441 | FBXL14    | NM_152441.1    | 2.01 | 1.01 | 8.81  | 7.81  | 5.53E-06  | 0.0000358 |
| ILMN_1699440 | ZNF651    | NM_145166.2    | 1.67 | 0.74 | 11.06 | 10.32 | 5.58E-06  | 0.0000361 |
| ILMN_1746604 | IL6ST     | NM_175767.1    | 1.58 | 0.66 | 8.78  | 8.12  | 0.0000056 | 0.0000362 |
| ILMN_1793384 | JAK1      | NM_002227.1    | 1.67 | 0.74 | 11.58 | 10.84 | 5.62E-06  | 0.0000363 |
| ILMN_2227120 | KIF5A     | NM_004984.2    | 1.87 | 0.9  | 8.97  | 8.07  | 5.65E-06  | 0.0000365 |
| ILMN_2366473 | ABCC9     | NM_020298.2    | 2.03 | 1.02 | 9.44  | 8.43  | 5.75E-06  | 0.0000371 |
| ILMN_1661299 | TLE6      | NM_024760.1    | 1.68 | 0.75 | 9.85  | 9.1   | 5.76E-06  | 0.0000371 |
| ILMN_2140380 | ZBTB12    | NM_181842.1    | 1.96 | 0.97 | 8.89  | 7.92  | 5.81E-06  | 0.0000374 |
| ILMN_1790154 | PHF21B    | NM_138415.1    | 1.56 | 0.64 | 10.21 | 9.58  | 5.88E-06  | 0.0000378 |
| ILMN_1678781 | SNX26     | NM_052948.2    | 1.53 | 0.61 | 12.88 | 12.28 | 6.08E-06  | 0.0000389 |
| ILMN_2391419 | SYNE2     | NM_015180.4    | 2.41 | 1.27 | 10.04 | 8.77  | 6.13E-06  | 0.0000392 |
| ILMN_1655577 | TIAM1     | NM_003253.1    | 1.59 | 0.67 | 10.77 | 10.1  | 6.27E-06  | 0.0000401 |
| ILMN_1654861 | ACO2      | NM_001098.2    | 1.53 | 0.61 | 12.25 | 11.64 | 6.28E-06  | 0.0000401 |
| ILMN_2290893 | PCDHA3    | NM_018906.2    | 2.14 | 1.1  | 9.77  | 8.67  | 6.31E-06  | 0.0000403 |
| ILMN_2044572 | TBC1D20   | NM_144628.2    | 1.65 | 0.72 | 11.81 | 11.1  | 6.32E-06  | 0.0000403 |
| ILMN_2295518 | TRO       | NM_001039705.1 | 1.58 | 0.66 | 12.76 | 12.1  | 6.38E-06  | 0.0000407 |
| ILMN_1690921 | STAT2     | NM_005419.2    | 1.54 | 0.62 | 13.03 | 12.41 | 6.52E-06  | 0.0000415 |
| ILMN_1723886 | ZFP2      | NM_030613.2    | 1.55 | 0.63 | 10.37 | 9.73  | 6.55E-06  | 0.0000416 |
| ILMN_1752032 | PPP2R3B   | NM_199326.1    | 1.62 | 0.7  | 9.2   | 8.5   | 6.59E-06  | 0.0000418 |
| ILMN_1704210 | CNTNAP4   | NM_033401.2    | 1.61 | 0.69 | 8.23  | 7.54  | 6.72E-06  | 0.0000426 |
| ILMN_1742541 | ZNF518    | NM_014803.2    | 1.58 | 0.66 | 9.92  | 9.26  | 6.81E-06  | 0.0000431 |
| ILMN_2304289 | GRIP1     | NM_021150.1    | 2.03 | 1.02 | 8.16  | 7.15  | 6.91E-06  | 0.0000437 |
| ILMN_1670008 | FLCN      | NM_144997.4    | 1.72 | 0.78 | 9.81  | 9.02  | 6.93E-06  | 0.0000438 |
| ILMN_2411791 | CNTFR     | NM_001842.3    | 1.88 | 0.91 | 8.6   | 7.69  | 6.99E-06  | 0.0000441 |
| ILMN_2202637 | CRY1      | NM_004075.2    | 1.89 | 0.92 | 11.45 | 10.52 | 7.06E-06  | 0.0000446 |
| ILMN_2102069 | SLC16A4   | NM_004696.1    | 1.66 | 0.73 | 8.95  | 8.22  | 7.16E-06  | 0.0000451 |
| ILMN_1687743 | BTBD7     | NM_001002860.2 | 1.55 | 0.63 | 11.27 | 10.64 | 7.17E-06  | 0.0000451 |
| ILMN_2094313 | ZDHHC1    | NM_013304.1    | 1.60 | 0.68 | 10.26 | 9.58  | 7.26E-06  | 0.0000457 |
| ILMN_2405534 | GAB1      | NM_002039.2    | 1.55 | 0.63 | 10.37 | 9.75  | 7.36E-06  | 0.0000462 |
| ILMN_1813104 | GALNTL2   | NM_054110.2    | 2.08 | 1.06 | 8.45  | 7.39  | 7.42E-06  | 0.0000466 |
| ILMN_1652371 | KIAA1324L | NM_152748.2    | 2.01 | 1.01 | 8.9   | 7.89  | 7.43E-06  | 0.0000466 |
| ILMN_2214355 | RAB30     | NM_014488.3    | 1.71 | 0.77 | 9.25  | 8.48  | 7.45E-06  | 0.0000467 |
| ILMN_2097259 | CYP2U1    | NM_183075.2    | 1.57 | 0.65 | 10.15 | 9.51  | 7.54E-06  | 0.0000472 |
| ILMN_2304186 | MITF      | NM_198158.1    | 1.68 | 0.75 | 8.95  | 8.2   | 7.63E-06  | 0.0000478 |
| ILMN_1668559 | RGS10     | NM_001005339.1 | 1.92 | 0.94 | 10.07 | 9.12  | 7.66E-06  | 0.0000479 |
| ILMN_1799082 | ZNF609    | NM_015042.1    | 1.67 | 0.74 | 10.22 | 9.48  | 7.66E-06  | 0.0000479 |
| ILMN_1668683 | MLL       | NM_005933.2    | 1.72 | 0.78 | 9.91  | 9.13  | 7.68E-06  | 0.000048  |
| ILMN_1758229 | QSCN6     | NM_002826.4    | 2.16 | 1.11 | 9.57  | 8.46  | 7.69E-06  | 0.0000481 |
| ILMN_1665871 | ANGEL1    | NM_015305.2    | 1.62 | 0.7  | 10.04 | 9.34  | 7.74E-06  | 0.0000483 |



Supplementary Table 2

|              |           |                |      |      |       |       |           |           |
|--------------|-----------|----------------|------|------|-------|-------|-----------|-----------|
| ILMN_1697975 | PHF14     | NM_014660.2    | 1.78 | 0.83 | 9.87  | 9.04  | 7.77E-06  | 0.0000485 |
| ILMN_1723494 | SIRT2     | NM_030593.1    | 1.61 | 0.69 | 10.52 | 9.83  | 7.87E-06  | 0.000049  |
| ILMN_2198867 | WDR49     | NM_178824.3    | 1.58 | 0.66 | 7.85  | 7.19  | 7.93E-06  | 0.0000494 |
| ILMN_1663665 | FLJ46082  | NM_207417.1    | 1.74 | 0.8  | 7.96  | 7.16  | 7.96E-06  | 0.0000495 |
| ILMN_1677326 | HYDIN     | XM_936224.1    | 1.60 | 0.68 | 8.4   | 7.72  | 8.04E-06  | 0.0000499 |
| ILMN_1748642 | C9ORF18   | NM_198469.1    | 1.73 | 0.79 | 7.95  | 7.16  | 8.05E-06  | 0.00005   |
| ILMN_2097858 | KIAA1737  | NM_033426.2    | 1.54 | 0.62 | 11.98 | 11.35 | 8.05E-06  | 0.00005   |
| ILMN_2199439 | CA2       | NM_000067.1    | 1.60 | 0.68 | 9.89  | 9.2   | 8.19E-06  | 0.0000507 |
| ILMN_1699503 | UBE2D2    | NM_003339.2    | 1.56 | 0.64 | 11.1  | 10.46 | 8.22E-06  | 0.0000509 |
| ILMN_1723536 | USP33     | NM_201626.1    | 1.68 | 0.75 | 10.51 | 9.76  | 8.23E-06  | 0.0000509 |
| ILMN_1723124 | GALK2     | NM_001001556.1 | 2.10 | 1.07 | 9.59  | 8.52  | 8.24E-06  | 0.000051  |
| ILMN_2144426 | HIST2H2AA | NM_003516.2    | 1.65 | 0.72 | 11.81 | 11.09 | 8.25E-06  | 0.000051  |
| ILMN_2285112 | FBXO11    | NM_025133.3    | 1.58 | 0.66 | 13.25 | 12.59 | 8.27E-06  | 0.0000511 |
| ILMN_1655748 | ZNF323    | NM_145909.1    | 1.67 | 0.74 | 9.86  | 9.13  | 8.37E-06  | 0.0000517 |
| ILMN_2381834 | TRIM69    | NM_080745.3    | 1.84 | 0.88 | 9.27  | 8.39  | 8.37E-06  | 0.0000517 |
| ILMN_1760303 | PIK3R1    | NM_181504.2    | 1.52 | 0.6  | 11.29 | 10.69 | 8.41E-06  | 0.0000519 |
| ILMN_1664928 | ZNF599    | NM_001007248.1 | 1.87 | 0.9  | 8.84  | 7.94  | 8.45E-06  | 0.0000521 |
| ILMN_1712419 | DCDC2     | NM_016356.1    | 1.77 | 0.82 | 8.36  | 7.54  | 0.000009  | 0.0000551 |
| ILMN_2329114 | COLQ      | NM_080539.2    | 1.62 | 0.7  | 8.38  | 7.68  | 9.03E-06  | 0.0000553 |
| ILMN_1799529 | ZNF441    | NM_152355.1    | 1.64 | 0.71 | 8.43  | 7.71  | 9.15E-06  | 0.000056  |
| ILMN_1772824 | WNT5B     | NM_032642.2    | 1.56 | 0.64 | 9.91  | 9.28  | 9.29E-06  | 0.0000567 |
| ILMN_1657515 | RPS6KA5   | NM_004755.2    | 1.49 | 0.58 | 10.45 | 9.86  | 9.31E-06  | 0.0000569 |
| ILMN_1793002 | FLJ25067  | NM_152504.2    | 2.06 | 1.04 | 10.15 | 9.1   | 9.32E-06  | 0.0000569 |
| ILMN_2095840 | MYST3     | NM_006766.2    | 1.85 | 0.89 | 12.43 | 11.53 | 9.38E-06  | 0.0000572 |
| ILMN_1766359 | GATAD2B   | NM_020699.1    | 1.52 | 0.6  | 11.37 | 10.77 | 9.38E-06  | 0.0000572 |
| ILMN_1748884 | TOB2      | NM_016272.3    | 1.77 | 0.82 | 10.3  | 9.48  | 9.54E-06  | 0.0000581 |
| ILMN_1767343 | LOC126147 | NM_145807.1    | 1.77 | 0.82 | 8.13  | 7.3   | 9.68E-06  | 0.0000589 |
| ILMN_1712461 | CBLN1     | NM_004352.1    | 1.73 | 0.79 | 8.71  | 7.93  | 9.78E-06  | 0.0000595 |
| ILMN_2341595 | KITLG     | NM_000899.3    | 2.25 | 1.17 | 10.31 | 9.13  | 9.93E-06  | 0.0000602 |
| ILMN_1682227 | ZNF404    | NM_001033719.1 | 2.10 | 1.07 | 9.33  | 8.26  | 9.96E-06  | 0.0000604 |
| ILMN_2211790 | ADAMTS7   | NM_014272.2    | 1.60 | 0.68 | 8.27  | 7.59  | 9.97E-06  | 0.0000604 |
| ILMN_2059797 | NOL3      | NM_003946.3    | 1.53 | 0.61 | 9.91  | 9.3   | 9.99E-06  | 0.0000605 |
| ILMN_1807031 | C14ORF28  | NM_001017923.1 | 1.61 | 0.69 | 9.59  | 8.91  | 0.0000101 | 0.0000608 |
| ILMN_2404688 | NUPR1     | NM_001042483.1 | 1.65 | 0.72 | 10.41 | 9.7   | 0.0000101 | 0.0000612 |
| ILMN_1747932 | TMPRSS7   | XM_938469.1    | 1.59 | 0.67 | 7.63  | 6.97  | 0.0000101 | 0.0000613 |
| ILMN_1668586 | KCND1     | NM_004979.4    | 1.56 | 0.64 | 9.32  | 8.68  | 0.0000102 | 0.0000614 |
| ILMN_1734346 | C19ORF36  | NM_001031735.1 | 1.69 | 0.76 | 9.16  | 8.4   | 0.0000102 | 0.0000616 |
| ILMN_1742450 | TAPBP     | NM_003190.3    | 1.52 | 0.6  | 12.4  | 11.81 | 0.0000103 | 0.0000622 |
| ILMN_1799487 | CG018     | NM_052818.1    | 1.78 | 0.83 | 8.65  | 7.83  | 0.0000104 | 0.000063  |
| ILMN_2294684 | CEP170    | NM_014812.2    | 1.64 | 0.71 | 9.34  | 8.64  | 0.0000105 | 0.0000631 |
| ILMN_1809496 | COPG2     | NM_012133.2    | 1.68 | 0.75 | 11.34 | 10.59 | 0.0000106 | 0.000064  |
| ILMN_1715203 | DNAH7     | NM_018897.1    | 1.65 | 0.72 | 8.59  | 7.87  | 0.000011  | 0.0000657 |
| ILMN_2361810 | DRD3      | NM_000796.3    | 1.66 | 0.73 | 8.24  | 7.51  | 0.000011  | 0.0000661 |

Supplementary Table 2

|              |           |                |      |      |       |       |           |           |
|--------------|-----------|----------------|------|------|-------|-------|-----------|-----------|
| ILMN_2134130 | FLG       | NM_002016.1    | 2.66 | 1.41 | 8.2   | 6.79  | 0.0000112 | 0.0000669 |
| ILMN_1745533 | LOC81558  | NM_030802.2    | 1.83 | 0.87 | 8.63  | 7.76  | 0.0000112 | 0.000067  |
| ILMN_2041780 | SNTG2     | NM_018968.2    | 1.79 | 0.84 | 8.17  | 7.33  | 0.0000112 | 0.000067  |
| ILMN_2224990 | HIST1H4J  | NM_021968.3    | 2.43 | 1.28 | 9.65  | 8.37  | 0.0000112 | 0.000067  |
| ILMN_1786273 | C1ORF122  | NM_198446.1    | 1.51 | 0.59 | 12.96 | 12.37 | 0.0000115 | 0.0000687 |
| ILMN_1736796 | RB1CC1    | NM_014781.3    | 1.53 | 0.61 | 12.08 | 11.47 | 0.0000116 | 0.0000692 |
| ILMN_1685792 | MAG11     | NM_004742.2    | 1.51 | 0.59 | 8.6   | 8.01  | 0.0000117 | 0.0000698 |
| ILMN_1703511 | PDZRN3    | XM_946222.1    | 1.89 | 0.92 | 9.24  | 8.33  | 0.0000117 | 0.0000698 |
| ILMN_2273609 | KIAA1543  | NM_001080429.1 | 1.73 | 0.79 | 8.24  | 7.44  | 0.0000118 | 0.0000704 |
| ILMN_1708485 | BIN3      | NM_018688.3    | 1.61 | 0.69 | 9.46  | 8.77  | 0.0000121 | 0.0000717 |
| ILMN_1659075 | HLA-DOA   | NM_002119.3    | 1.69 | 0.76 | 9.38  | 8.62  | 0.0000123 | 0.0000729 |
| ILMN_2062701 | GAS1      | NM_002048.1    | 2.08 | 1.06 | 10.02 | 8.96  | 0.0000128 | 0.0000756 |
| ILMN_1790508 | KCNA5     | NM_002234.2    | 2.46 | 1.3  | 9.02  | 7.72  | 0.0000132 | 0.0000773 |
| ILMN_1684571 | TSGA2     | NM_080860.2    | 1.64 | 0.71 | 8.94  | 8.23  | 0.0000132 | 0.0000777 |
| ILMN_1652797 | LOC400451 | NM_207446.1    | 3.03 | 1.6  | 9.62  | 8.02  | 0.0000132 | 0.0000777 |
| ILMN_1814316 | A2BP1     | NM_018723.2    | 1.78 | 0.83 | 8.08  | 7.25  | 0.0000133 | 0.0000779 |
| ILMN_1745860 | FLJ40852  | NM_173677.1    | 1.71 | 0.77 | 9.72  | 8.95  | 0.0000133 | 0.000078  |
| ILMN_2041483 | PCDHB10   | NM_018930.3    | 2.41 | 1.27 | 9.87  | 8.6   | 0.0000134 | 0.0000787 |
| ILMN_1740572 | TCN2      | NM_000355.2    | 1.67 | 0.74 | 10.26 | 9.52  | 0.0000135 | 0.0000788 |
| ILMN_2170476 | PCDHB18   | NR_001281.1    | 1.89 | 0.92 | 9.41  | 8.48  | 0.0000136 | 0.0000797 |
| ILMN_1769769 | CDKL4     | NM_001009565.1 | 1.71 | 0.77 | 8.41  | 7.64  | 0.0000137 | 0.0000798 |
| ILMN_1796490 | GRINA     | NM_000837.1    | 1.53 | 0.61 | 12.36 | 11.75 | 0.0000137 | 0.0000799 |
| ILMN_2404065 | APP       | NM_201414.1    | 1.80 | 0.85 | 14.17 | 13.31 | 0.000014  | 0.0000815 |
| ILMN_1762262 | PKIA      | NM_006823.2    | 1.64 | 0.71 | 11.67 | 10.96 | 0.0000143 | 0.0000832 |
| ILMN_1711049 | CACNA2D2  | NM_001005505.1 | 2.03 | 1.02 | 9.41  | 8.39  | 0.0000146 | 0.0000847 |
| ILMN_2351269 | TTYH1     | NM_001005367.1 | 1.68 | 0.75 | 12.81 | 12.06 | 0.0000148 | 0.0000858 |
| ILMN_1754130 | TRIM52    | NM_032765.2    | 1.71 | 0.77 | 9.91  | 9.14  | 0.0000154 | 0.000089  |
| ILMN_2353327 | RNF38     | NM_194328.2    | 1.62 | 0.7  | 11.12 | 10.43 | 0.0000155 | 0.0000895 |
| ILMN_1737981 | FSTL5     | NM_020116.2    | 1.79 | 0.84 | 8.27  | 7.43  | 0.0000155 | 0.00009   |
| ILMN_1731064 | CABC1     | NM_020247.3    | 1.73 | 0.79 | 11.1  | 10.31 | 0.0000156 | 0.0000902 |
| ILMN_1797155 | C17ORF75  | NM_022344.2    | 1.61 | 0.69 | 9.81  | 9.12  | 0.0000156 | 0.0000903 |
| ILMN_1803652 | C9ORF91   | NM_153045.2    | 1.60 | 0.68 | 9.54  | 8.85  | 0.0000158 | 0.0000911 |
| ILMN_1746696 | APRIN     | NM_015032.1    | 1.67 | 0.74 | 10.51 | 9.77  | 0.000016  | 0.0000926 |
| ILMN_1675984 | ARHGEF7   | NM_003899.2    | 1.66 | 0.73 | 9.8   | 9.08  | 0.000016  | 0.0000926 |
| ILMN_1745607 | A2M       | NM_000014.4    | 2.51 | 1.33 | 12.11 | 10.79 | 0.0000162 | 0.0000933 |
| ILMN_1814629 | ZC3H12B   | NM_001010888.1 | 1.65 | 0.72 | 9.22  | 8.5   | 0.0000162 | 0.0000934 |
| ILMN_2412624 | TP53I11   | NM_006034.2    | 1.65 | 0.72 | 9.13  | 8.41  | 0.0000163 | 0.0000939 |
| ILMN_1704362 | ZNF174    | NM_003450.1    | 1.73 | 0.79 | 9.39  | 8.59  | 0.0000165 | 0.0000947 |
| ILMN_1770940 | CDH1      | NM_004360.2    | 1.82 | 0.86 | 8.19  | 7.33  | 0.0000167 | 0.0000961 |
| ILMN_2400661 | ZNF626    | NM_001076675.1 | 1.60 | 0.68 | 10.46 | 9.77  | 0.0000172 | 0.0000986 |
| ILMN_2196550 | C13ORF18  | NM_025113.1    | 1.69 | 0.76 | 8.58  | 7.82  | 0.0000178 | 0.0001    |
| ILMN_1664047 | CACNA1E   | NM_000721.2    | 1.69 | 0.76 | 8.14  | 7.38  | 0.0000179 | 0.0001    |
| ILMN_2278653 | ZNF493    | NM_001076678.1 | 1.78 | 0.83 | 9     | 8.17  | 0.000018  | 0.0001    |

Supplementary Table 2

|              |           |                |      |      |       |       |           |         |
|--------------|-----------|----------------|------|------|-------|-------|-----------|---------|
| ILMN_1762803 | RFXDC2    | NM_022841.2    | 1.78 | 0.83 | 9.74  | 8.91  | 0.0000183 | 0.0001  |
| ILMN_2186137 | RRAD      | NM_004165.1    | 1.54 | 0.62 | 7.9   | 7.28  | 0.0000183 | 0.0001  |
| ILMN_1721629 | ZNF654    | NM_018293.2    | 1.55 | 0.63 | 9.97  | 9.33  | 0.0000184 | 0.0001  |
| ILMN_1665547 | CADPS     | NM_183394.1    | 1.62 | 0.7  | 9.77  | 9.07  | 0.0000186 | 0.00011 |
| ILMN_1712066 | EXPH5     | NM_015065.1    | 1.62 | 0.7  | 8.29  | 7.59  | 0.0000187 | 0.00011 |
| ILMN_1665217 | C3ORF34   | NM_032898.2    | 1.53 | 0.61 | 10.02 | 9.41  | 0.0000193 | 0.00011 |
| ILMN_2364384 | PPARG     | NM_138712.3    | 1.66 | 0.73 | 8.07  | 7.34  | 0.0000194 | 0.00011 |
| ILMN_1807277 | IFI30     | NM_006332.3    | 1.69 | 0.76 | 8.39  | 7.63  | 0.0000196 | 0.00011 |
| ILMN_1772727 | GPR75     | NM_006794.1    | 1.69 | 0.76 | 8.11  | 7.35  | 0.00002   | 0.00011 |
| ILMN_1701681 | SEC11L3   | NM_033280.1    | 1.51 | 0.59 | 11.9  | 11.31 | 0.0000201 | 0.00011 |
| ILMN_2381697 | P4HA2     | NM_001017974.1 | 1.64 | 0.71 | 10.02 | 9.32  | 0.0000202 | 0.00011 |
| ILMN_2139396 | NOPE      | NM_020962.1    | 1.89 | 0.92 | 12.74 | 11.82 | 0.0000208 | 0.00012 |
| ILMN_1698770 | FLJ30596  | NM_153013.2    | 1.64 | 0.71 | 9.79  | 9.08  | 0.000021  | 0.00012 |
| ILMN_1667592 | PARVB     | NM_001003828.1 | 1.52 | 0.6  | 9.04  | 8.44  | 0.0000211 | 0.00012 |
| ILMN_1741056 | CXXC6     | NM_030625.1    | 1.89 | 0.92 | 9.23  | 8.31  | 0.0000215 | 0.00012 |
| ILMN_1663858 | ZNF286    | NM_020652.1    | 1.54 | 0.62 | 11.21 | 10.6  | 0.0000222 | 0.00012 |
| ILMN_1662741 | EDG4      | NM_004720.4    | 1.65 | 0.72 | 10.78 | 10.06 | 0.0000222 | 0.00012 |
| ILMN_1785731 | MAPK8IP2  | NM_012324.2    | 1.55 | 0.63 | 9.36  | 8.74  | 0.0000223 | 0.00012 |
| ILMN_1815033 | HPCA      | NM_002143.2    | 1.83 | 0.87 | 8.37  | 7.5   | 0.0000239 | 0.00013 |
| ILMN_1693483 | FGF18     | NM_033649.1    | 1.72 | 0.78 | 7.78  | 7     | 0.0000241 | 0.00013 |
| ILMN_1690096 | PPP1R1B   | NM_032192.2    | 1.79 | 0.84 | 8.32  | 7.48  | 0.0000241 | 0.00013 |
| ILMN_2093427 | SHF       | NM_138356.2    | 1.60 | 0.68 | 9.46  | 8.78  | 0.0000242 | 0.00013 |
| ILMN_1736585 | TMED10    | NM_006827.4    | 1.62 | 0.7  | 13.33 | 12.62 | 0.0000244 | 0.00014 |
| ILMN_2053334 | LRRTM3    | NM_178011.3    | 1.99 | 0.99 | 9.18  | 8.19  | 0.0000249 | 0.00014 |
| ILMN_1772074 | LOC352909 | NM_001031802.1 | 1.56 | 0.64 | 9.27  | 8.63  | 0.0000249 | 0.00014 |
| ILMN_1707461 | TXNDC8    | NM_001003936.1 | 1.68 | 0.75 | 7.9   | 7.15  | 0.0000249 | 0.00014 |
| ILMN_1777895 | LRRC37B   | NM_052888.2    | 1.51 | 0.59 | 11.51 | 10.92 | 0.0000251 | 0.00014 |
| ILMN_1801383 | SMG1      | NM_015092.3    | 1.72 | 0.78 | 11.45 | 10.67 | 0.0000252 | 0.00014 |
| ILMN_2334359 | GFRA1     | NM_005264.3    | 1.60 | 0.68 | 9.31  | 8.62  | 0.0000253 | 0.00014 |
| ILMN_1651504 | C4ORF8    | NM_003704.3    | 1.55 | 0.63 | 11.08 | 10.45 | 0.0000256 | 0.00014 |
| ILMN_1789040 | SLITRK5   | NM_015567.1    | 1.80 | 0.85 | 8.48  | 7.63  | 0.0000258 | 0.00014 |
| ILMN_1681542 | HIST1H4E  | NM_003545.3    | 1.55 | 0.63 | 8.72  | 8.09  | 0.0000259 | 0.00014 |
| ILMN_2160005 | NUMA1     | NM_006185.2    | 1.71 | 0.77 | 11.91 | 11.14 | 0.0000259 | 0.00014 |
| ILMN_1653412 | RAXL1     | NM_032753.2    | 1.49 | 0.58 | 10.05 | 9.47  | 0.0000267 | 0.00015 |
| ILMN_2050813 | CLGN      | NM_004362.1    | 2.20 | 1.14 | 8.39  | 7.26  | 0.0000271 | 0.00015 |
| ILMN_1679299 | IGSF1     | NM_001555.2    | 1.77 | 0.82 | 8.45  | 7.62  | 0.0000272 | 0.00015 |
| ILMN_1654966 | SCARA3    | NM_182826.1    | 1.51 | 0.59 | 9.67  | 9.08  | 0.0000274 | 0.00015 |
| ILMN_1652381 | LOC653723 | XM_929209.1    | 1.62 | 0.7  | 8.78  | 8.08  | 0.0000275 | 0.00015 |
| ILMN_2246510 | TSC1      | NM_000368.3    | 1.66 | 0.73 | 11.93 | 11.2  | 0.0000283 | 0.00015 |
| ILMN_1678337 | MAP1B     | NM_032010.1    | 1.57 | 0.65 | 8.27  | 7.62  | 0.0000285 | 0.00016 |
| ILMN_1781431 | GLCC1     | NM_138426.1    | 1.55 | 0.63 | 9.94  | 9.32  | 0.0000287 | 0.00016 |
| ILMN_2398159 | DKK3      | NM_013253.4    | 1.58 | 0.66 | 15.12 | 14.46 | 0.0000288 | 0.00016 |
| ILMN_2055760 | KIAA1715  | NM_030650.1    | 1.65 | 0.72 | 11.7  | 10.99 | 0.0000288 | 0.00016 |

Supplementary Table 2

|              |           |                |      |      |       |       |           |         |
|--------------|-----------|----------------|------|------|-------|-------|-----------|---------|
| ILMN_2198594 | RFPL1S    | NR_002727.1    | 1.59 | 0.67 | 8.62  | 7.95  | 0.0000294 | 0.00016 |
| ILMN_1701111 | KIAA1434  | NM_019593.2    | 1.82 | 0.86 | 9.87  | 9.01  | 0.0000299 | 0.00016 |
| ILMN_1653263 | KIAA1893  | NM_052899.1    | 1.51 | 0.59 | 9.98  | 9.39  | 0.00003   | 0.00016 |
| ILMN_2158003 | KIAA1683  | NM_025249.1    | 1.73 | 0.79 | 8.98  | 8.19  | 0.00003   | 0.00016 |
| ILMN_1705253 | PTPRD     | NM_130391.2    | 1.95 | 0.96 | 8.65  | 7.7   | 0.0000301 | 0.00016 |
| ILMN_1719864 | PACS2     | NM_015197.1    | 1.51 | 0.59 | 10.63 | 10.04 | 0.0000304 | 0.00017 |
| ILMN_2380605 | MTMR3     | NM_153050.1    | 1.82 | 0.86 | 10.08 | 9.22  | 0.0000306 | 0.00017 |
| ILMN_1741780 | LOC285193 | NM_001033575.1 | 1.49 | 0.58 | 11.57 | 10.99 | 0.0000322 | 0.00017 |
| ILMN_1741059 | SCN1A     | NM_006920.2    | 1.71 | 0.77 | 8.83  | 8.06  | 0.0000323 | 0.00017 |
| ILMN_1809208 | KIAA1543  | XM_048362.9    | 1.79 | 0.84 | 8.61  | 7.78  | 0.0000323 | 0.00017 |
| ILMN_1756501 | ST6GAL1   | NM_173217.1    | 1.64 | 0.71 | 9.91  | 9.21  | 0.0000327 | 0.00018 |
| ILMN_2383516 | WDR7      | NM_015285.2    | 1.51 | 0.59 | 11.18 | 10.59 | 0.0000328 | 0.00018 |
| ILMN_1742704 | GNAO1     | NM_138736.1    | 1.52 | 0.6  | 8.39  | 7.79  | 0.0000335 | 0.00018 |
| ILMN_2327860 | MAL       | NM_022440.1    | 1.52 | 0.6  | 10.64 | 10.04 | 0.0000336 | 0.00018 |
| ILMN_1770758 | AKAP6     | NM_004274.3    | 1.65 | 0.72 | 9.45  | 8.73  | 0.0000339 | 0.00018 |
| ILMN_2244841 | ALDH4A1   | NM_003748.2    | 1.61 | 0.69 | 9.45  | 8.76  | 0.0000341 | 0.00018 |
| ILMN_1789567 | MAGED2    | NM_014599.4    | 1.54 | 0.62 | 10.83 | 10.22 | 0.0000352 | 0.00019 |
| ILMN_1733221 | LOC349236 | NM_182635.1    | 1.54 | 0.62 | 8.13  | 7.51  | 0.0000366 | 0.0002  |
| ILMN_1750563 | CEECAM1   | NM_016174.3    | 1.53 | 0.61 | 10.68 | 10.07 | 0.000037  | 0.0002  |
| ILMN_2344298 | STEAP2    | NM_152999.2    | 1.92 | 0.94 | 8.75  | 7.81  | 0.0000376 | 0.0002  |
| ILMN_1768050 | SCOC      | NM_032547.1    | 1.54 | 0.62 | 12.29 | 11.66 | 0.0000384 | 0.0002  |
| ILMN_1745079 | TRIM2     | NM_015271.2    | 1.92 | 0.94 | 11.28 | 10.34 | 0.000039  | 0.00021 |
| ILMN_1712798 | ZNF608    | NM_020747.1    | 1.82 | 0.86 | 9.33  | 8.46  | 0.0000395 | 0.00021 |
| ILMN_2184064 | ARRDC4    | NM_183376.1    | 2.28 | 1.19 | 10.8  | 9.61  | 0.0000398 | 0.00021 |
| ILMN_1736654 | PIP5K1B   | NM_001031687.1 | 1.59 | 0.67 | 8     | 7.32  | 0.0000405 | 0.00021 |
| ILMN_1748738 | SLC22A17  | NM_020372.2    | 1.53 | 0.61 | 9.53  | 8.92  | 0.0000405 | 0.00021 |
| ILMN_2046470 | DAAM1     | NM_014992.1    | 1.92 | 0.94 | 10.54 | 9.6   | 0.0000405 | 0.00021 |
| ILMN_1778347 | NUDT2     | NM_147173.1    | 1.58 | 0.66 | 11.87 | 11.21 | 0.0000405 | 0.00021 |
| ILMN_1681467 | RAB11FIP4 | NM_032932.3    | 1.52 | 0.6  | 7.97  | 7.37  | 0.0000407 | 0.00021 |
| ILMN_2258543 | PRDM2     | NM_012231.3    | 1.56 | 0.64 | 9.23  | 8.59  | 0.0000414 | 0.00022 |
| ILMN_1800412 | BMP1      | NM_006129.2    | 1.52 | 0.6  | 11.13 | 10.53 | 0.0000432 | 0.00023 |
| ILMN_1753026 | PRG-3     | NM_017753.2    | 1.89 | 0.92 | 9.91  | 8.99  | 0.0000433 | 0.00023 |
| ILMN_1664362 | SGIP1     | NM_032291.1    | 1.52 | 0.6  | 8.02  | 7.42  | 0.0000435 | 0.00023 |
| ILMN_2355586 | ATRN      | NM_139322.1    | 1.67 | 0.74 | 9.4   | 8.66  | 0.0000441 | 0.00023 |
| ILMN_1680928 | DNM3      | NM_015569.2    | 1.54 | 0.62 | 11.13 | 10.52 | 0.0000447 | 0.00023 |
| ILMN_2122103 | ETS1      | NM_005238.2    | 1.99 | 0.99 | 9.62  | 8.63  | 0.0000454 | 0.00024 |
| ILMN_1750880 | LOC196394 | NM_207337.1    | 1.96 | 0.97 | 9.24  | 8.27  | 0.0000461 | 0.00024 |
| ILMN_1703142 | 2-MAR     | NM_001005415.1 | 1.51 | 0.59 | 11.2  | 10.61 | 0.0000466 | 0.00024 |
| ILMN_1681249 | KIF21A    | NM_017641.2    | 1.52 | 0.6  | 10.99 | 10.39 | 0.0000467 | 0.00024 |
| ILMN_1656088 | C1ORF110  | NM_178550.3    | 1.93 | 0.95 | 8.75  | 7.8   | 0.0000467 | 0.00024 |
| ILMN_2084073 | UCN       | NM_003353.2    | 1.89 | 0.92 | 9.43  | 8.51  | 0.0000472 | 0.00025 |
| ILMN_1682818 | TTLL3     | NM_015644.2    | 1.64 | 0.71 | 9.94  | 9.23  | 0.0000472 | 0.00025 |
| ILMN_1764231 | LMO3      | NM_018640.3    | 1.65 | 0.72 | 8.16  | 7.45  | 0.0000474 | 0.00025 |

Supplementary Table 2

|              |           |                |      |      |       |       |           |         |
|--------------|-----------|----------------|------|------|-------|-------|-----------|---------|
| ILMN_1717706 | PLK2      | NM_006622.1    | 1.95 | 0.96 | 9.24  | 8.28  | 0.000048  | 0.00025 |
| ILMN_2266184 | NCALD     | NM_032041.1    | 1.56 | 0.64 | 8.05  | 7.41  | 0.000048  | 0.00025 |
| ILMN_1669772 | LRP1      | NM_002332.1    | 1.69 | 0.76 | 9.66  | 8.9   | 0.0000489 | 0.00025 |
| ILMN_1656920 | CRIP1     | NM_001311.3    | 1.78 | 0.83 | 8.8   | 7.97  | 0.0000494 | 0.00026 |
| ILMN_2117223 | ROD1      | NM_005156.4    | 1.60 | 0.68 | 10.54 | 9.86  | 0.0000502 | 0.00026 |
| ILMN_1677586 | KRTHB3    | NM_002282.2    | 1.57 | 0.65 | 8.39  | 7.74  | 0.0000512 | 0.00026 |
| ILMN_1765109 | TNFRSF25  | NM_148973.1    | 1.49 | 0.58 | 10.63 | 10.04 | 0.0000531 | 0.00027 |
| ILMN_1769615 | FLRT2     | NM_013231.4    | 1.79 | 0.84 | 8.72  | 7.87  | 0.0000538 | 0.00028 |
| ILMN_1716195 | HIST1H2BG | NM_003518.3    | 1.73 | 0.79 | 9.6   | 8.82  | 0.0000551 | 0.00028 |
| ILMN_1754076 | CACNA2D3  | NM_018398.2    | 1.66 | 0.73 | 8.78  | 8.05  | 0.0000581 | 0.0003  |
| ILMN_2345319 | PREPL     | NM_006036.3    | 1.55 | 0.63 | 11.88 | 11.26 | 0.0000597 | 0.0003  |
| ILMN_2331735 | AP2B1     | NM_001282.2    | 1.55 | 0.63 | 11.58 | 10.95 | 0.00006   | 0.0003  |
| ILMN_2185339 | LRRC51    | NM_145309.1    | 1.51 | 0.59 | 10.4  | 9.81  | 0.0000607 | 0.00031 |
| ILMN_1705035 | FBXL7     | NM_012304.3    | 1.52 | 0.6  | 9.99  | 9.39  | 0.0000615 | 0.00031 |
| ILMN_1663379 | FBXL15    | NM_024326.2    | 1.54 | 0.62 | 11.07 | 10.45 | 0.0000622 | 0.00031 |
| ILMN_1792242 | C8ORF44   | NM_019607.1    | 1.56 | 0.64 | 9.05  | 8.41  | 0.0000632 | 0.00032 |
| ILMN_1669876 | CUTL2     | NM_015267.1    | 1.55 | 0.63 | 7.74  | 7.11  | 0.0000654 | 0.00033 |
| ILMN_1696466 | ROPN1L    | NM_031916.2    | 1.66 | 0.73 | 8.3   | 7.57  | 0.000066  | 0.00033 |
| ILMN_1651710 | IQCD      | NM_138451.1    | 1.62 | 0.7  | 8.36  | 7.66  | 0.0000677 | 0.00034 |
| ILMN_1792182 | RDH12     | NM_152443.1    | 1.53 | 0.61 | 7.96  | 7.35  | 0.0000682 | 0.00034 |
| ILMN_1719069 | FOXN4     | NM_213596.1    | 1.58 | 0.66 | 8.29  | 7.63  | 0.0000693 | 0.00035 |
| ILMN_1761963 | FLJ21106  | NM_025097.1    | 1.51 | 0.59 | 9.57  | 8.98  | 0.00007   | 0.00035 |
| ILMN_1681657 | MAP4K4    | NM_145686.2    | 1.75 | 0.81 | 8.86  | 8.04  | 0.0000703 | 0.00035 |
| ILMN_1769633 | CTSO      | NM_001334.2    | 1.74 | 0.8  | 10.22 | 9.43  | 0.0000711 | 0.00035 |
| ILMN_2415748 | WSB1      | NM_134265.2    | 1.60 | 0.68 | 12.13 | 11.45 | 0.0000717 | 0.00036 |
| ILMN_2232368 | C20ORF67  | NM_022104.3    | 1.68 | 0.75 | 10.03 | 9.28  | 0.000072  | 0.00036 |
| ILMN_2052686 | C6ORF152  | NM_181714.1    | 1.84 | 0.88 | 9.58  | 8.7   | 0.0000725 | 0.00036 |
| ILMN_1752968 | LAMB2     | NM_002292.2    | 1.52 | 0.6  | 11.08 | 10.48 | 0.0000728 | 0.00036 |
| ILMN_2127328 | PURA      | NM_005859.3    | 1.62 | 0.7  | 10.81 | 10.11 | 0.0000732 | 0.00036 |
| ILMN_1654639 | HERC6     | NM_001013005.1 | 1.56 | 0.64 | 8.74  | 8.11  | 0.0000738 | 0.00037 |
| ILMN_1808272 | KCNJ10    | NM_002241.2    | 1.55 | 0.63 | 9.82  | 9.19  | 0.000074  | 0.00037 |
| ILMN_1736180 | FRAT1     | NM_005479.2    | 1.67 | 0.74 | 8.21  | 7.46  | 0.0000753 | 0.00037 |
| ILMN_1658917 | SLC1A1    | NM_004170.4    | 1.92 | 0.94 | 8.95  | 8.01  | 0.0000765 | 0.00038 |
| ILMN_1809086 | XRN1      | NM_019001.2    | 1.75 | 0.81 | 10.02 | 9.2   | 0.000077  | 0.00038 |
| ILMN_1739914 | ZNF618    | NM_133374.1    | 1.58 | 0.66 | 10.57 | 9.92  | 0.0000772 | 0.00038 |
| ILMN_1812902 | CYYR1     | NM_052954.2    | 1.54 | 0.62 | 8.26  | 7.65  | 0.0000791 | 0.00039 |
| ILMN_1734021 | CLSTN3    | NM_014718.2    | 1.75 | 0.81 | 8.87  | 8.06  | 0.0000806 | 0.0004  |
| ILMN_1815148 | MAN2A2    | NM_006122.2    | 1.54 | 0.62 | 9.35  | 8.74  | 0.000084  | 0.00041 |
| ILMN_2367215 | PRCP      | NM_005040.2    | 1.59 | 0.67 | 12.52 | 11.85 | 0.0000858 | 0.00042 |
| ILMN_1794842 | LGALS13   | NM_013268.2    | 1.56 | 0.64 | 9.12  | 8.48  | 0.0000859 | 0.00042 |
| ILMN_1699574 | NRP1      | NM_003873.3    | 1.60 | 0.68 | 12.88 | 12.2  | 0.0000863 | 0.00042 |
| ILMN_2344650 | CG018     | NM_001079691.1 | 1.69 | 0.76 | 8.56  | 7.79  | 0.0000891 | 0.00043 |
| ILMN_1696991 | DYRK1B    | NM_006484.1    | 1.88 | 0.91 | 9.66  | 8.75  | 0.0000898 | 0.00044 |

Supplementary Table 2

|              |           |                |      |      |       |       |           |         |
|--------------|-----------|----------------|------|------|-------|-------|-----------|---------|
| ILMN_1798971 | FZD5      | NM_003468.2    | 1.57 | 0.65 | 9.94  | 9.29  | 0.0000899 | 0.00044 |
| ILMN_1697289 | ZNF713    | NM_182633.1    | 1.56 | 0.64 | 8.87  | 8.23  | 0.0000899 | 0.00044 |
| ILMN_1664802 | WSB1      | NM_134264.2    | 1.51 | 0.59 | 10.61 | 10.02 | 0.00009   | 0.00044 |
| ILMN_1688666 | HIST1H2BH | NM_003524.2    | 1.74 | 0.8  | 9.52  | 8.71  | 0.0000907 | 0.00044 |
| ILMN_1784269 | AASDH     | NM_181806.2    | 1.67 | 0.74 | 10.3  | 9.56  | 0.0000909 | 0.00044 |
| ILMN_1801366 | DNASE1L2  | NM_001374.2    | 1.68 | 0.75 | 8.76  | 8.01  | 0.0000919 | 0.00045 |
| ILMN_1714000 | NXPH3     | NM_007225.1    | 1.54 | 0.62 | 8.41  | 7.8   | 0.0000928 | 0.00045 |
| ILMN_1658015 | MBNL2     | NM_144778.2    | 2.11 | 1.08 | 9.77  | 8.69  | 0.0000977 | 0.00047 |
| ILMN_1663816 | LOC130940 | NM_138803.2    | 1.51 | 0.59 | 7.99  | 7.4   | 0.0001    | 0.00049 |
| ILMN_1706498 | SART2     | NM_013352.1    | 1.61 | 0.69 | 9.79  | 9.1   | 0.0001    | 0.00049 |
| ILMN_2323413 | KRIT1     | NM_001013406.1 | 1.51 | 0.59 | 7.78  | 7.19  | 0.0001    | 0.00049 |
| ILMN_2058468 | BACH2     | NM_021813.1    | 1.59 | 0.67 | 9.82  | 9.14  | 0.0001    | 0.0005  |
| ILMN_1767349 | ABCB4     | NM_000443.2    | 1.61 | 0.69 | 8.11  | 7.42  | 0.0001    | 0.0005  |
| ILMN_2373377 | RTN2      | NM_206902.1    | 1.52 | 0.6  | 8.92  | 8.32  | 0.00011   | 0.00051 |
| ILMN_2214197 | TP53INP1  | NM_033285.2    | 1.88 | 0.91 | 11.13 | 10.23 | 0.00011   | 0.00052 |
| ILMN_1783946 | MRC2      | NM_006039.2    | 1.59 | 0.67 | 10.39 | 9.72  | 0.00011   | 0.00052 |
| ILMN_1740083 | ORC4L     | NM_181742.1    | 1.53 | 0.61 | 9.67  | 9.06  | 0.00011   | 0.00052 |
| ILMN_2089616 | FBXO10    | NM_012166.2    | 1.60 | 0.68 | 9.92  | 9.23  | 0.00011   | 0.00053 |
| ILMN_1806533 | PDE7B     | NM_018945.3    | 1.60 | 0.68 | 8.15  | 7.47  | 0.00011   | 0.00053 |
| ILMN_1701837 | KLHL2     | NM_007246.2    | 1.72 | 0.78 | 10.07 | 9.29  | 0.00011   | 0.00054 |
| ILMN_1771710 | S100B     | NM_006272.1    | 1.59 | 0.67 | 7.93  | 7.26  | 0.00012   | 0.00055 |
| ILMN_1706357 | RFX2      | NM_000635.2    | 1.67 | 0.74 | 9.29  | 8.55  | 0.00012   | 0.00055 |
| ILMN_1732722 | TRSPAP1   | NM_017846.3    | 1.57 | 0.65 | 10.15 | 9.51  | 0.00012   | 0.00056 |
| ILMN_1678541 | LOC654084 | XM_938984.1    | 1.64 | 0.71 | 9.34  | 8.63  | 0.00012   | 0.00057 |
| ILMN_2151075 | LOC55565  | NM_017530.1    | 1.57 | 0.65 | 11.2  | 10.55 | 0.00013   | 0.0006  |
| ILMN_1732554 | ZNF346    | NM_012279.2    | 1.57 | 0.65 | 9.08  | 8.43  | 0.00013   | 0.00061 |
| ILMN_1728001 | P18SRP    | NM_173829.2    | 1.55 | 0.63 | 9.27  | 8.64  | 0.00013   | 0.00062 |
| ILMN_1702305 | NCAM1     | NM_000615.1    | 1.56 | 0.64 | 9.57  | 8.93  | 0.00013   | 0.00062 |
| ILMN_1675124 | DDX17     | NM_006386.3    | 1.49 | 0.58 | 12.75 | 12.16 | 0.00013   | 0.00063 |
| ILMN_2103388 | ZNF509    | NM_145291.2    | 1.59 | 0.67 | 9.34  | 8.67  | 0.00013   | 0.00063 |
| ILMN_2102960 | KIAA1370  | NM_019600.1    | 2.20 | 1.14 | 10.2  | 9.06  | 0.00014   | 0.00063 |
| ILMN_2085844 | LOC727936 | NM_001080393.1 | 1.56 | 0.64 | 8.64  | 8     | 0.00014   | 0.00064 |
| ILMN_1806242 | PSD       | NM_002779.3    | 1.54 | 0.62 | 8.53  | 7.91  | 0.00014   | 0.00065 |
| ILMN_1713161 | USP16     | NM_001032410.1 | 1.62 | 0.7  | 8.45  | 7.76  | 0.00014   | 0.00065 |
| ILMN_2379063 | NDRG4     | NM_020465.2    | 1.64 | 0.71 | 9.63  | 8.92  | 0.00014   | 0.00065 |
| ILMN_2059211 | KIAA0195  | NM_014738.2    | 1.60 | 0.68 | 10.51 | 9.83  | 0.00014   | 0.00065 |
| ILMN_1709907 | B3GALT2   | NM_003783.2    | 1.58 | 0.66 | 8.58  | 7.92  | 0.00014   | 0.00065 |
| ILMN_1718866 | MGC23985  | NM_206966.1    | 1.64 | 0.71 | 8.03  | 7.32  | 0.00015   | 0.00068 |
| ILMN_1749131 | ENPP3     | NM_005021.2    | 1.58 | 0.66 | 8.13  | 7.47  | 0.00015   | 0.0007  |
| ILMN_2325337 | APOL2     | NM_145637.1    | 1.58 | 0.66 | 9.56  | 8.9   | 0.00015   | 0.00071 |
| ILMN_2052717 | GRAMD1C   | NM_017577.2    | 2.25 | 1.17 | 8.3   | 7.13  | 0.00016   | 0.00072 |
| ILMN_1698608 | FOLR1     | NM_016725.1    | 1.56 | 0.64 | 8.13  | 7.5   | 0.00016   | 0.00073 |
| ILMN_2235851 | LINCR     | NM_001080535.1 | 1.62 | 0.7  | 8.48  | 7.79  | 0.00016   | 0.00073 |

Supplementary Table 2

|              |          |                |      |      |       |       |         |         |
|--------------|----------|----------------|------|------|-------|-------|---------|---------|
| ILMN_2396546 | IGSF3    | NM_001542.2    | 1.80 | 0.85 | 9.61  | 8.77  | 0.00016 | 0.00073 |
| ILMN_2396287 | RFX2     | NM_134433.1    | 1.60 | 0.68 | 9.21  | 8.53  | 0.00016 | 0.00074 |
| ILMN_1664525 | P2RY13   | NM_176894.1    | 1.75 | 0.81 | 8.41  | 7.61  | 0.00016 | 0.00074 |
| ILMN_1794534 | FLJ23514 | NM_021827.2    | 1.61 | 0.69 | 9.11  | 8.41  | 0.00016 | 0.00074 |
| ILMN_1775336 | TSPYL2   | NM_022117.1    | 1.66 | 0.73 | 8.46  | 7.72  | 0.00016 | 0.00074 |
| ILMN_1652777 | CDC42EP2 | NM_006779.2    | 1.75 | 0.81 | 9.58  | 8.77  | 0.00017 | 0.00076 |
| ILMN_1676062 | DIP2C    | NM_014974.1    | 1.61 | 0.69 | 11.39 | 10.71 | 0.00017 | 0.00076 |
| ILMN_1655985 | GALNT10  | NM_017540.3    | 1.68 | 0.75 | 9.03  | 8.28  | 0.00017 | 0.00077 |
| ILMN_1708110 | FLJ11155 | NM_018342.2    | 1.77 | 0.82 | 8.31  | 7.5   | 0.00017 | 0.00077 |
| ILMN_1784756 | ACOT7    | NM_181866.2    | 1.57 | 0.65 | 8.49  | 7.84  | 0.00017 | 0.0008  |
| ILMN_2190598 | FGD6     | NM_018351.2    | 1.78 | 0.83 | 8.97  | 8.14  | 0.00018 | 0.0008  |
| ILMN_1689176 | FLJ23191 | NM_024574.2    | 1.55 | 0.63 | 7.95  | 7.31  | 0.00018 | 0.00081 |
| ILMN_1706304 | EIF2C4   | NM_017629.2    | 1.62 | 0.7  | 8.87  | 8.17  | 0.00018 | 0.00083 |
| ILMN_1790109 | THAP8    | NM_152658.1    | 1.49 | 0.58 | 9.33  | 8.75  | 0.00018 | 0.00084 |
| ILMN_1677098 | YPEL2    | NM_001005404.3 | 1.83 | 0.87 | 9.28  | 8.41  | 0.00019 | 0.00084 |
| ILMN_1690646 | SATB1    | NM_002971.2    | 1.54 | 0.62 | 8.4   | 7.78  | 0.00019 | 0.00084 |
| ILMN_1656496 | EPC2     | NM_015630.2    | 1.66 | 0.73 | 9.38  | 8.65  | 0.00019 | 0.00087 |
| ILMN_1703374 | NAV1     | NM_020443.2    | 1.49 | 0.58 | 12.36 | 11.78 | 0.00019 | 0.00087 |
| ILMN_2309848 | FXD5     | NM_014164.4    | 1.57 | 0.65 | 8.77  | 8.12  | 0.00019 | 0.00088 |
| ILMN_1682270 | FGFR2    | NM_022971.1    | 1.58 | 0.66 | 8.26  | 7.6   | 0.0002  | 0.00088 |
| ILMN_1763793 | PPM1L    | NM_139245.2    | 1.57 | 0.65 | 8.18  | 7.53  | 0.0002  | 0.00089 |
| ILMN_1673503 | CACNB4   | NM_001005747.1 | 1.53 | 0.61 | 8.67  | 8.06  | 0.0002  | 0.00092 |
| ILMN_1772189 | ABCD1    | NM_000033.2    | 1.83 | 0.87 | 9.34  | 8.47  | 0.00021 | 0.00093 |
| ILMN_2183687 | LIME1    | NM_017806.1    | 1.58 | 0.66 | 11.16 | 10.51 | 0.00021 | 0.00094 |
| ILMN_1770641 | KLHL3    | NM_017415.1    | 1.68 | 0.75 | 9.63  | 8.87  | 0.00021 | 0.00094 |
| ILMN_1809817 | FLJ23834 | NM_152750.2    | 1.65 | 0.72 | 8.36  | 7.64  | 0.00021 | 0.00095 |
| ILMN_1766950 | PCDHB13  | NM_018933.2    | 1.78 | 0.83 | 8.3   | 7.46  | 0.00021 | 0.00095 |
| ILMN_1777934 | MORN3    | NM_173855.3    | 1.51 | 0.59 | 8.58  | 7.99  | 0.00022 | 0.00096 |
| ILMN_1685891 | ETV1     | NM_004956.3    | 1.75 | 0.81 | 10.01 | 9.19  | 0.00022 | 0.00096 |
| ILMN_1705663 | DMXL2    | NM_015263.1    | 1.67 | 0.74 | 9.81  | 9.08  | 0.00022 | 0.00096 |
| ILMN_2124802 | MT1H     | NM_005951.2    | 1.53 | 0.61 | 8.81  | 8.2   | 0.00022 | 0.00099 |
| ILMN_1765204 | ST13     | NM_003932.3    | 1.54 | 0.62 | 13.04 | 12.42 | 0.00023 | 0.001   |
| ILMN_1676099 | SPON2    | NM_012445.1    | 1.79 | 0.84 | 8.17  | 7.33  | 0.00023 | 0.00102 |
| ILMN_1810856 | HDAC5    | NM_001015053.1 | 1.61 | 0.69 | 8.99  | 8.3   | 0.00023 | 0.00103 |
| ILMN_1701991 | SYNJ1    | NM_203446.1    | 1.66 | 0.73 | 10.21 | 9.48  | 0.00024 | 0.00104 |
| ILMN_2324162 | SLC45A1  | NM_001080397.1 | 1.59 | 0.67 | 8.77  | 8.09  | 0.00024 | 0.00106 |
| ILMN_2145997 | SP4      | NM_003112.3    | 1.72 | 0.78 | 10.05 | 9.27  | 0.00025 | 0.00109 |
| ILMN_1794470 | ANKFY1   | NM_016376.2    | 1.49 | 0.58 | 12.23 | 11.64 | 0.00025 | 0.0011  |
| ILMN_2196347 | CDKN1B   | NM_004064.2    | 1.66 | 0.73 | 10.28 | 9.55  | 0.00025 | 0.0011  |
| ILMN_1705733 | KIAA0460 | NM_015203.2    | 1.59 | 0.67 | 9.36  | 8.69  | 0.00026 | 0.00111 |
| ILMN_1762801 | KLF12    | NM_016285.2    | 1.53 | 0.61 | 8.1   | 7.48  | 0.00026 | 0.00112 |
| ILMN_1761764 | ALKBH7   | NM_032306.2    | 1.49 | 0.58 | 11.98 | 11.4  | 0.00026 | 0.00113 |
| ILMN_1687216 | PCBP3    | NM_020528.1    | 1.51 | 0.59 | 8.3   | 7.72  | 0.00026 | 0.00114 |

Supplementary Table 2

|              |          |                |      |      |       |       |         |         |
|--------------|----------|----------------|------|------|-------|-------|---------|---------|
| ILMN_1702407 | SPIN     | NM_006717.1    | 1.51 | 0.59 | 11.12 | 10.54 | 0.00027 | 0.00115 |
| ILMN_2338447 | ARID4A   | NM_023000.2    | 1.56 | 0.64 | 9.7   | 9.06  | 0.00027 | 0.00117 |
| ILMN_1670878 | YTHDC1   | NM_133370.1    | 1.84 | 0.88 | 9.83  | 8.95  | 0.00027 | 0.00117 |
| ILMN_1655177 | PIK4CA   | NM_058004.1    | 1.49 | 0.58 | 12.86 | 12.28 | 0.00027 | 0.00119 |
| ILMN_1736752 | COMTD1   | NM_144589.2    | 1.55 | 0.63 | 9.73  | 9.1   | 0.00027 | 0.00119 |
| ILMN_2185665 | PGAP1    | NM_024989.3    | 1.61 | 0.69 | 10.1  | 9.41  | 0.00027 | 0.00119 |
| ILMN_2330213 | CUTL1    | NM_001913.2    | 1.53 | 0.61 | 9.62  | 9.01  | 0.00028 | 0.00122 |
| ILMN_1690179 | CRYM     | NM_001888.2    | 1.52 | 0.6  | 9.88  | 9.28  | 0.00029 | 0.00124 |
| ILMN_1760037 | C6ORF134 | NM_001031722.1 | 1.58 | 0.66 | 8.88  | 8.22  | 0.00029 | 0.00124 |
| ILMN_1693392 | RGAG4    | NM_001024455.1 | 1.55 | 0.63 | 8.59  | 7.95  | 0.00029 | 0.00126 |
| ILMN_1712913 | UNC5A    | NM_133369.2    | 1.55 | 0.63 | 8.54  | 7.92  | 0.00029 | 0.00126 |
| ILMN_2129877 | PARP11   | NM_020367.3    | 1.60 | 0.68 | 10.37 | 9.69  | 0.0003  | 0.00128 |
| ILMN_2387105 | OGN      | NM_014057.3    | 1.56 | 0.64 | 8.27  | 7.63  | 0.0003  | 0.00128 |
| ILMN_1737416 | PGBD3    | NM_170753.1    | 1.53 | 0.61 | 8.94  | 8.33  | 0.0003  | 0.00129 |
| ILMN_2142979 | PTBP2    | NM_021190.1    | 1.71 | 0.77 | 10.69 | 9.92  | 0.0003  | 0.00129 |
| ILMN_2323848 | PARD6A   | NM_016948.2    | 1.60 | 0.68 | 9.9   | 9.23  | 0.0003  | 0.0013  |
| ILMN_2334296 | IL18BP   | NM_173042.2    | 1.57 | 0.65 | 9.48  | 8.83  | 0.00031 | 0.00131 |
| ILMN_2139052 | ZKSCAN1  | NM_003439.1    | 1.60 | 0.68 | 9.03  | 8.35  | 0.00031 | 0.00132 |
| ILMN_2268618 | PHF20L1  | NM_198513.1    | 1.58 | 0.66 | 8.58  | 7.92  | 0.00031 | 0.00132 |
| ILMN_1801605 | BIRC6    | NM_016252.2    | 1.49 | 0.58 | 9.92  | 9.34  | 0.00031 | 0.00133 |
| ILMN_2413323 | GRP      | NM_001012513.1 | 1.54 | 0.62 | 7.85  | 7.23  | 0.00031 | 0.00134 |
| ILMN_1789593 | PRPF40B  | NM_001031698.1 | 1.59 | 0.67 | 8.78  | 8.11  | 0.00032 | 0.00134 |
| ILMN_1715332 | TTC21A   | NM_145755.1    | 1.62 | 0.7  | 8.72  | 8.02  | 0.00032 | 0.00138 |
| ILMN_2044293 | KBTBD7   | NM_032138.3    | 1.54 | 0.62 | 9.5   | 8.88  | 0.00033 | 0.0014  |
| ILMN_2246134 | PDE4DIP  | NM_001002811.1 | 1.55 | 0.63 | 8.76  | 8.13  | 0.00033 | 0.0014  |
| ILMN_2320906 | RTN3     | NM_006054.2    | 1.96 | 0.97 | 11.55 | 10.58 | 0.00034 | 0.00142 |
| ILMN_2370296 | ENAH     | NM_018212.4    | 1.73 | 0.79 | 11.05 | 10.26 | 0.00034 | 0.00142 |
| ILMN_1695413 | ZNF429   | NM_001001415.1 | 1.56 | 0.64 | 9.24  | 8.61  | 0.00034 | 0.00143 |
| ILMN_1656934 | REPS2    | XM_942570.1    | 1.54 | 0.62 | 8.08  | 7.46  | 0.00034 | 0.00143 |
| ILMN_1783161 | DAB2IP   | NM_032552.1    | 1.57 | 0.65 | 9.14  | 8.49  | 0.00034 | 0.00144 |
| ILMN_1717265 | FLJ37078 | NM_153043.3    | 1.78 | 0.83 | 8.63  | 7.81  | 0.00035 | 0.00147 |
| ILMN_1808379 | PLCD4    | NM_032726.2    | 1.51 | 0.59 | 8.96  | 8.37  | 0.00036 | 0.00153 |
| ILMN_1690708 | SPTBN1   | NM_178313.1    | 1.54 | 0.62 | 10.82 | 10.2  | 0.00039 | 0.00161 |
| ILMN_2345353 | LST1     | NM_205840.1    | 1.51 | 0.59 | 8.32  | 7.73  | 0.00039 | 0.00163 |
| ILMN_1794638 | VIP      | NM_194435.1    | 1.58 | 0.66 | 8.01  | 7.35  | 0.00039 | 0.00164 |
| ILMN_1754757 | SCNN1D   | NM_002978.2    | 1.56 | 0.64 | 10.24 | 9.6   | 0.0004  | 0.00167 |
| ILMN_1722532 | JMJD1A   | NM_018433.3    | 1.74 | 0.8  | 10.43 | 9.63  | 0.00041 | 0.00168 |
| ILMN_1767362 | ADAMTS6  | NM_197941.2    | 1.53 | 0.61 | 8.56  | 7.95  | 0.00042 | 0.00172 |
| ILMN_1741970 | JUP      | NM_002230.1    | 1.62 | 0.7  | 8.79  | 8.09  | 0.00042 | 0.00175 |
| ILMN_2391400 | PITX2    | NM_153427.1    | 2.30 | 1.2  | 9.15  | 7.95  | 0.00042 | 0.00175 |
| ILMN_2329885 | CEP170   | NM_001042404.1 | 1.71 | 0.77 | 9.62  | 8.85  | 0.00043 | 0.00176 |
| ILMN_1769433 | IQGAP2   | NM_006633.1    | 1.61 | 0.69 | 9.04  | 8.35  | 0.00044 | 0.00179 |
| ILMN_1683959 | THRAP2   | NM_015335.2    | 1.55 | 0.63 | 9.09  | 8.46  | 0.00044 | 0.0018  |



Supplementary Table 2

|              |          |                |      |      |       |       |         |         |
|--------------|----------|----------------|------|------|-------|-------|---------|---------|
| ILMN_1736054 | SUB1     | NM_006713.2    | 1.58 | 0.66 | 12.55 | 11.89 | 0.00044 | 0.00182 |
| ILMN_1676283 | RIMBP2   | NM_015347.3    | 1.67 | 0.74 | 8.17  | 7.43  | 0.00045 | 0.00183 |
| ILMN_1712352 | DOCK3    | NM_004947.3    | 1.56 | 0.64 | 9.07  | 8.43  | 0.00046 | 0.00187 |
| ILMN_1787378 | ADD3     | NM_016824.3    | 1.71 | 0.77 | 9.28  | 8.51  | 0.00049 | 0.00198 |
| ILMN_1759987 | HS6ST1   | NM_004807.1    | 1.67 | 0.74 | 9.71  | 8.97  | 0.00049 | 0.00199 |
| ILMN_1805024 | ERBB2IP  | NM_018695.2    | 1.54 | 0.62 | 9.7   | 9.08  | 0.0005  | 0.00203 |
| ILMN_1788689 | PHIP     | NM_017934.4    | 1.53 | 0.61 | 11.32 | 10.71 | 0.0005  | 0.00203 |
| ILMN_2394902 | ACCN4    | NM_018674.3    | 1.79 | 0.84 | 8.66  | 7.82  | 0.00051 | 0.00205 |
| ILMN_1781672 | GAB1     | NM_207123.1    | 1.66 | 0.73 | 11.01 | 10.28 | 0.00053 | 0.00212 |
| ILMN_1806328 | PDIK1L   | NM_152835.1    | 1.53 | 0.61 | 11.01 | 10.4  | 0.00054 | 0.00215 |
| ILMN_1683313 | ST3GAL1  | NM_173344.1    | 1.52 | 0.6  | 9.67  | 9.07  | 0.00054 | 0.00217 |
| ILMN_2095114 | PCDHB11  | NM_018931.2    | 1.64 | 0.71 | 7.8   | 7.09  | 0.00055 | 0.00219 |
| ILMN_1738854 | CACHD1   | NM_020925.1    | 1.61 | 0.69 | 10.2  | 9.51  | 0.00057 | 0.00228 |
| ILMN_1692094 | GRIA4    | NM_000829.1    | 1.56 | 0.64 | 8.87  | 8.23  | 0.00058 | 0.00229 |
| ILMN_2229379 | KIT      | NM_000222.1    | 1.53 | 0.61 | 9.07  | 8.46  | 0.00058 | 0.00231 |
| ILMN_1743205 | ABCA7    | NM_019112.2    | 1.77 | 0.82 | 8.61  | 7.79  | 0.00058 | 0.00231 |
| ILMN_1733415 | MFAP5    | NM_003480.2    | 1.69 | 0.76 | 10.46 | 9.7   | 0.00059 | 0.00234 |
| ILMN_1789500 | KIAA1875 | NM_032529.1    | 1.66 | 0.73 | 8.83  | 8.1   | 0.0006  | 0.00237 |
| ILMN_1706051 | PLD5     | NM_152666.1    | 1.59 | 0.67 | 8.52  | 7.85  | 0.00061 | 0.00241 |
| ILMN_1770667 | HECA     | NM_016217.2    | 1.54 | 0.62 | 8.69  | 8.07  | 0.00061 | 0.00241 |
| ILMN_1781373 | IFIH1    | NM_022168.2    | 1.53 | 0.61 | 9.28  | 8.68  | 0.00061 | 0.00242 |
| ILMN_1813517 | DISP2    | NM_033510.1    | 1.49 | 0.58 | 10    | 9.42  | 0.00063 | 0.00247 |
| ILMN_2208373 | TMEM164  | NM_032227.2    | 1.61 | 0.69 | 9.29  | 8.6   | 0.00064 | 0.00251 |
| ILMN_1776395 | ARMC4    | NM_018076.2    | 1.62 | 0.7  | 8.08  | 7.38  | 0.00066 | 0.00258 |
| ILMN_1812080 | PARP16   | NM_017851.4    | 1.65 | 0.72 | 9.8   | 9.08  | 0.00068 | 0.00265 |
| ILMN_1764754 | RAMP1    | NM_005855.2    | 1.58 | 0.66 | 12.48 | 11.82 | 0.00069 | 0.00269 |
| ILMN_2054510 | BCAS3    | NM_017679.2    | 1.52 | 0.6  | 8.18  | 7.58  | 0.0007  | 0.00272 |
| ILMN_1782032 | ASH1L    | NM_018489.1    | 1.49 | 0.58 | 8.38  | 7.8   | 0.00072 | 0.00278 |
| ILMN_1722798 | PLCD3    | NM_133373.2    | 1.51 | 0.59 | 10.75 | 10.16 | 0.00072 | 0.00279 |
| ILMN_1753112 | CD5      | NM_014207.2    | 1.79 | 0.84 | 9.15  | 8.31  | 0.00072 | 0.0028  |
| ILMN_1745686 | MFHAS1   | NM_004225.1    | 1.88 | 0.91 | 9.88  | 8.98  | 0.00072 | 0.00281 |
| ILMN_1697952 | OSBPL1A  | NM_018030.3    | 1.67 | 0.74 | 8.85  | 8.12  | 0.00073 | 0.00282 |
| ILMN_1752750 | MCF2     | NM_005369.2    | 1.56 | 0.64 | 8.43  | 7.8   | 0.00074 | 0.00285 |
| ILMN_2339028 | PKD1     | NM_001009944.1 | 1.52 | 0.6  | 9.81  | 9.22  | 0.00075 | 0.00289 |
| ILMN_1768251 | SLC25A26 | NM_173471.1    | 1.54 | 0.62 | 9.22  | 8.6   | 0.00076 | 0.00292 |
| ILMN_1742046 | VN1R1    | NM_020633.2    | 1.69 | 0.76 | 8.36  | 7.6   | 0.00076 | 0.00295 |
| ILMN_1675956 | LYST     | NM_000081.2    | 1.92 | 0.94 | 9.46  | 8.53  | 0.00077 | 0.00298 |
| ILMN_2112915 | DRD4     | NM_000797.2    | 1.51 | 0.59 | 8.85  | 8.26  | 0.00081 | 0.00312 |
| ILMN_2068257 | MXRA8    | NM_032348.2    | 1.72 | 0.78 | 9.59  | 8.82  | 0.00082 | 0.00315 |
| ILMN_1720181 | CLSTN1   | XM_937951.1    | 1.52 | 0.6  | 10.44 | 9.83  | 0.00093 | 0.0035  |
| ILMN_1688101 | BTNL2    | NM_019602.1    | 1.64 | 0.71 | 10.33 | 9.62  | 0.00095 | 0.00357 |
| ILMN_1727738 | RAB33B   | NM_031296.1    | 1.51 | 0.59 | 8.82  | 8.23  | 0.00096 | 0.0036  |
| ILMN_2256868 | NCOR2    | NM_006312.3    | 1.71 | 0.77 | 8.91  | 8.14  | 0.00098 | 0.00367 |

Supplementary Table 2

|              |           |                |        |       |       |       |          |          |
|--------------|-----------|----------------|--------|-------|-------|-------|----------|----------|
| ILMN_1802674 | PACRG     | NM_152410.1    | 1.52   | 0.6   | 8.16  | 7.56  | 0.001    | 0.00375  |
| ILMN_1773312 | INADL     | NM_170605.2    | 1.54   | 0.62  | 8.85  | 8.23  | 0.00101  | 0.00378  |
| ILMN_2100258 | PCDHB16   | NM_020957.1    | 1.66   | 0.73  | 8.66  | 7.93  | 0.00106  | 0.00393  |
| ILMN_1676247 | JPH2      | NM_175913.3    | 1.62   | 0.7   | 9.62  | 8.91  | 0.00113  | 0.00416  |
| ILMN_2295987 | NBPF1     | NM_017940.2    | 1.65   | 0.72  | 9.31  | 8.59  | 0.00113  | 0.00417  |
| ILMN_1666076 | ARHGEF4   | NM_032995.1    | 1.55   | 0.63  | 9.56  | 8.93  | 0.00113  | 0.00417  |
| ILMN_1738955 | C10ORF104 | NM_173473.2    | 1.57   | 0.65  | 10.18 | 9.52  | 0.00115  | 0.00423  |
| ILMN_1809101 | STEAP2    | NM_152999.2    | 1.69   | 0.76  | 8.48  | 7.72  | 0.00119  | 0.00439  |
| ILMN_1702715 | MECP2     | NM_004992.2    | 1.72   | 0.78  | 9.61  | 8.83  | 0.00131  | 0.00477  |
| ILMN_1721132 | DKKL1     | NM_014419.3    | 1.59   | 0.67  | 9.44  | 8.78  | 0.00138  | 0.00503  |
| ILMN_1801586 | HGF       | NM_001010931.1 | 1.61   | 0.69  | 8.1   | 7.41  | 0.00142  | 0.00513  |
| ILMN_1684563 | LOC139886 | NM_001012968.1 | 1.51   | 0.59  | 10.67 | 10.07 | 0.00142  | 0.00514  |
| ILMN_2062381 | LCOR      | NM_032440.1    | 1.55   | 0.63  | 9.64  | 9.01  | 0.0015   | 0.00542  |
| ILMN_1656927 | SEMA5A    | NM_003966.1    | 1.64   | 0.71  | 11.65 | 10.94 | 0.00151  | 0.00545  |
| ILMN_1684439 | MLF1      | NM_022443.2    | 1.54   | 0.62  | 8.59  | 7.97  | 0.00154  | 0.00554  |
| ILMN_1659820 | PTD004    | NM_013341.3    | 1.54   | 0.62  | 8.33  | 7.71  | 0.00159  | 0.00569  |
| ILMN_1779410 | VAPA      | NM_194434.2    | 1.73   | 0.79  | 9.06  | 8.27  | 0.00159  | 0.00569  |
| ILMN_2324375 | CHCHD7    | NM_001011670.1 | 1.62   | 0.7   | 8.79  | 8.1   | 0.00159  | 0.00571  |
| ILMN_1712283 | WNT10B    | NM_003394.2    | 1.62   | 0.7   | 8.86  | 8.16  | 0.00164  | 0.00585  |
| ILMN_1773310 | FUT5      | NM_002034.2    | 1.51   | 0.59  | 8.19  | 7.6   | 0.00168  | 0.00599  |
| ILMN_1675117 | DHRS8     | NM_016245.2    | 1.75   | 0.81  | 8.92  | 8.11  | 0.00174  | 0.00617  |
| ILMN_2112755 | HSDL1     | NM_031463.3    | 1.54   | 0.62  | 10.84 | 10.22 | 0.00184  | 0.0065   |
| ILMN_1658706 | ST6GALNAC | NM_006456.1    | 1.49   | 0.58  | 9.09  | 8.51  | 0.00197  | 0.00691  |
| ILMN_1664439 | TAF1      | NM_004606.2    | 1.54   | 0.62  | 9.19  | 8.57  | 0.00199  | 0.00696  |
| ILMN_1674908 | HOXB5     | NM_002147.2    | 1.56   | 0.64  | 8.84  | 8.2   | 0.00205  | 0.00715  |
| ILMN_1715255 | MAGI2     | NM_012301.3    | 1.58   | 0.66  | 8.56  | 7.89  | 0.00228  | 0.00785  |
| ILMN_1806149 | MGC17624  | NM_206967.1    | 1.51   | 0.59  | 10.12 | 9.53  | 0.00239  | 0.00819  |
| ILMN_2173611 | MT1E      | NM_175617.3    | 1.53   | 0.61  | 10.11 | 9.49  | 0.00242  | 0.0083   |
| ILMN_1785785 | NCOA1     | NM_147223.2    | 1.58   | 0.66  | 8.81  | 8.14  | 0.00274  | 0.00926  |
| ILMN_1688373 | LST1      | NM_205837.1    | 1.71   | 0.77  | 8.64  | 7.87  | 0.00281  | 0.00946  |
| ILMN_2306631 | SP8       | NM_182700.2    | 1.55   | 0.63  | 10.85 | 10.22 | 0.00293  | 0.00982  |
| ILMN_1758067 | RGS4      | NM_005613.3    | -20.11 | -4.33 | 10.52 | 14.85 | 1.05E-19 | 1.98E-16 |
| ILMN_1708934 | ADM       | NM_001124.1    | -10.13 | -3.34 | 11.29 | 14.63 | 2.1E-19  | 3.03E-16 |
| ILMN_1770338 | TM4SF1    | NM_014220.2    | -9.58  | -3.26 | 8.4   | 11.66 | 3.82E-19 | 4.94E-16 |
| ILMN_1751276 | BDNF      | NM_001709.3    | -9.19  | -3.2  | 7.7   | 10.91 | 5.06E-19 | 5.91E-16 |
| ILMN_1801616 | EMP1      | NM_001423.1    | -12.91 | -3.69 | 10.73 | 14.43 | 1.1E-18  | 9.74E-16 |
| ILMN_1671486 | HOMER2    | NM_004839.2    | -9.92  | -3.31 | 9.57  | 12.88 | 1.12E-18 | 9.74E-16 |
| ILMN_2215989 | NEFM      | NM_005382.1    | -19.43 | -4.28 | 8.66  | 12.94 | 1.15E-18 | 9.74E-16 |
| ILMN_1705579 | MPP4      | NM_033066.1    | -11.47 | -3.52 | 7.3   | 10.82 | 1.9E-18  | 1.5E-15  |
| ILMN_1689431 | FLJ90166  | NM_153360.1    | -11.00 | -3.46 | 9     | 12.47 | 3.45E-18 | 2.53E-15 |
| ILMN_1727532 | OLFML3    | NM_020190.2    | -12.38 | -3.63 | 8.67  | 12.3  | 4.22E-18 | 2.81E-15 |
| ILMN_1659086 | NEFL      | NM_006158.1    | -17.88 | -4.16 | 8.73  | 12.89 | 5.15E-18 | 3.08E-15 |
| ILMN_1739222 | ETV5      | NM_004454.1    | -7.84  | -2.97 | 11.36 | 14.33 | 1E-17    | 5.22E-15 |

Supplementary Table 2

|              |           |                |        |       |       |       |          |          |
|--------------|-----------|----------------|--------|-------|-------|-------|----------|----------|
| ILMN_1757497 | VGf       | NM_003378.2    | -11.31 | -3.5  | 10.05 | 13.56 | 1.08E-17 | 5.51E-15 |
| ILMN_1677466 | DUSP6     | NM_001946.2    | -9.32  | -3.22 | 8.91  | 12.13 | 1.3E-17  | 6.18E-15 |
| ILMN_1656501 | DUSP5     | NM_004419.3    | -6.28  | -2.65 | 9.46  | 12.11 | 1.31E-17 | 6.18E-15 |
| ILMN_1732296 | ID3       | NM_002167.2    | -8.51  | -3.09 | 11.64 | 14.72 | 1.57E-17 | 7.2E-15  |
| ILMN_2121408 | HBEGF     | NM_001945.1    | -4.53  | -2.18 | 10.44 | 12.62 | 3.36E-17 | 1.29E-14 |
| ILMN_2367883 | GEM       | NM_181702.1    | -7.67  | -2.94 | 9.48  | 12.42 | 4.98E-17 | 1.82E-14 |
| ILMN_2188521 | PVRL3     | NM_015480.1    | -5.46  | -2.45 | 10.26 | 12.71 | 5.53E-17 | 1.93E-14 |
| ILMN_2089752 | LOC285016 | NM_001002919.1 | -11.08 | -3.47 | 9.23  | 12.71 | 5.74E-17 | 1.93E-14 |
| ILMN_2396875 | IGFBP3    | NM_001013398.1 | -6.63  | -2.73 | 10.94 | 13.67 | 7.55E-17 | 2.37E-14 |
| ILMN_1778668 | TAGLN     | NM_003186.3    | -6.87  | -2.78 | 12.56 | 15.34 | 8.56E-17 | 2.59E-14 |
| ILMN_1696167 | SYT6      | NM_205848.1    | -6.59  | -2.72 | 8.72  | 11.44 | 1.17E-16 | 3.33E-14 |
| ILMN_1810725 | C1ORF24   | NM_022083.1    | -7.73  | -2.95 | 10    | 12.95 | 1.24E-16 | 3.41E-14 |
| ILMN_1689004 | TNFRSF12A | NM_016639.1    | -7.84  | -2.97 | 11.04 | 14.01 | 1.31E-16 | 3.56E-14 |
| ILMN_1679391 | MAMDC2    | NM_153267.3    | -23.75 | -4.57 | 7.52  | 12.1  | 1.52E-16 | 3.98E-14 |
| ILMN_1792885 | CTSC      | NM_001814.2    | -10.34 | -3.37 | 9.15  | 12.53 | 1.56E-16 | 4.02E-14 |
| ILMN_1653856 | STS-1     | NM_032873.3    | -7.78  | -2.96 | 10.3  | 13.26 | 1.57E-16 | 4.02E-14 |
| ILMN_1671392 | KCNF1     | NM_002236.4    | -8.22  | -3.04 | 10.45 | 13.49 | 2.09E-16 | 5.12E-14 |
| ILMN_2400935 | TAGLN     | NM_003186.3    | -10.48 | -3.39 | 10.75 | 14.14 | 2.39E-16 | 5.68E-14 |
| ILMN_2064725 | METTL7B   | NM_152637.1    | -5.70  | -2.51 | 11.34 | 13.85 | 2.75E-16 | 6.49E-14 |
| ILMN_2346479 | HOMER2    | NM_199332.2    | -10.13 | -3.34 | 8.83  | 12.17 | 3.03E-16 | 6.99E-14 |
| ILMN_1652185 | IL4R      | NM_000418.2    | -5.70  | -2.51 | 8.51  | 11.02 | 3.05E-16 | 6.99E-14 |
| ILMN_1784948 | SPOCD1    | NM_144569.3    | -6.73  | -2.75 | 9.72  | 12.47 | 4.31E-16 | 9.11E-14 |
| ILMN_2069286 | CHRNA9    | NM_017581.2    | -5.46  | -2.45 | 8.51  | 10.95 | 7.71E-16 | 1.43E-13 |
| ILMN_1753135 | ALK       | NM_004304.3    | -5.10  | -2.35 | 10.06 | 12.4  | 9.53E-16 | 1.73E-13 |
| ILMN_2374340 | PLAUR     | NM_001005376.1 | -6.41  | -2.68 | 9.08  | 11.76 | 1.05E-15 | 1.87E-13 |
| ILMN_1711899 | ANXA2     | NM_001002857.1 | -5.06  | -2.34 | 10.82 | 13.16 | 1.29E-15 | 2.16E-13 |
| ILMN_1747016 | CEP55     | NM_018131.3    | -4.79  | -2.26 | 9.92  | 12.18 | 1.36E-15 | 2.25E-13 |
| ILMN_1811468 | IRX3      | NM_024336.1    | -5.17  | -2.37 | 10.83 | 13.2  | 1.69E-15 | 2.74E-13 |
| ILMN_1771841 | FOSL1     | NM_005438.2    | -10.70 | -3.42 | 8.05  | 11.47 | 1.71E-15 | 2.76E-13 |
| ILMN_1660718 | GABBR2    | NM_005458.5    | -4.59  | -2.2  | 12.04 | 14.24 | 1.84E-15 | 2.93E-13 |
| ILMN_1679318 | ARSJ      | NM_024590.2    | -6.36  | -2.67 | 8.81  | 11.47 | 2.16E-15 | 3.35E-13 |
| ILMN_1792455 | RIS1      | NM_015444.1    | -4.72  | -2.24 | 13.24 | 15.47 | 2.28E-15 | 3.49E-13 |
| ILMN_1738558 | RGS20     | NM_170587.1    | -5.50  | -2.46 | 9.44  | 11.9  | 2.32E-15 | 3.51E-13 |
| ILMN_1744387 | KCNIP1    | NM_014592.2    | -4.26  | -2.09 | 11.18 | 13.27 | 2.39E-15 | 3.6E-13  |
| ILMN_1788107 | IL11      | NM_000641.2    | -6.41  | -2.68 | 7.83  | 10.51 | 2.41E-15 | 3.6E-13  |
| ILMN_2225318 | SMS       | NM_004595.2    | -3.66  | -1.87 | 12.29 | 14.16 | 2.53E-15 | 3.72E-13 |
| ILMN_1720998 | CA12      | NM_001218.3    | -5.86  | -2.55 | 11.75 | 14.3  | 2.76E-15 | 3.99E-13 |
| ILMN_2357086 | NETO1     | NM_153181.2    | -6.11  | -2.61 | 7.82  | 10.43 | 2.9E-15  | 4.11E-13 |
| ILMN_2408543 | PLAUR     | NM_002659.2    | -7.06  | -2.82 | 7.8   | 10.63 | 2.98E-15 | 4.19E-13 |
| ILMN_1806908 | PRKCB1    | NM_002738.5    | -6.28  | -2.65 | 9.21  | 11.86 | 3.19E-15 | 4.37E-13 |
| ILMN_2242463 | CTSC      | NM_001814.2    | -9.99  | -3.32 | 9.35  | 12.67 | 3.43E-15 | 4.63E-13 |
| ILMN_2056975 | HPRT1     | NM_000194.1    | -3.81  | -1.93 | 11.06 | 12.98 | 3.49E-15 | 4.68E-13 |
| ILMN_1664861 | ID1       | NM_181353.1    | -13.27 | -3.73 | 9.15  | 12.88 | 4.01E-15 | 5.25E-13 |

Supplementary Table 2

|              |           |                |        |       |       |       |          |          |
|--------------|-----------|----------------|--------|-------|-------|-------|----------|----------|
| ILMN_1671703 | ACTA2     | NM_001613.1    | -3.97  | -1.99 | 13.31 | 15.3  | 4.95E-15 | 6.39E-13 |
| ILMN_2337263 | PKIB      | NM_032471.4    | -7.11  | -2.83 | 8.68  | 11.51 | 5.45E-15 | 6.85E-13 |
| ILMN_1792679 | ITGA5     | NM_002205.2    | -6.11  | -2.61 | 9.25  | 11.86 | 5.51E-15 | 6.88E-13 |
| ILMN_1665510 | ERRFI1    | NM_018948.2    | -3.63  | -1.86 | 12.29 | 14.14 | 6.46E-15 | 7.85E-13 |
| ILMN_1757604 | TPM2      | NM_003289.3    | -5.43  | -2.44 | 11.11 | 13.55 | 6.47E-15 | 7.85E-13 |
| ILMN_1749071 | CNIH3     | NM_152495.1    | -4.08  | -2.03 | 10.31 | 12.34 | 6.64E-15 | 8.02E-13 |
| ILMN_1803811 | TRIB1     | NM_025195.2    | -4.99  | -2.32 | 9.96  | 12.28 | 6.87E-15 | 8.22E-13 |
| ILMN_1720282 | NQO1      | NM_000903.2    | -3.34  | -1.74 | 10.69 | 12.43 | 7.03E-15 | 8.37E-13 |
| ILMN_1744381 | SERPINE1  | NM_000602.1    | -10.20 | -3.35 | 10.09 | 13.44 | 7.65E-15 | 9.07E-13 |
| ILMN_1702487 | SGK       | NM_005627.2    | -3.76  | -1.91 | 10.96 | 12.87 | 8.03E-15 | 9.42E-13 |
| ILMN_2086105 | SPRY4     | NM_030964.2    | -9.25  | -3.21 | 10.24 | 13.45 | 8.06E-15 | 9.42E-13 |
| ILMN_1783168 | NETO1     | NM_138999.1    | -6.63  | -2.73 | 7.87  | 10.6  | 8.3E-15  | 9.65E-13 |
| ILMN_2141807 | C15ORF23  | NM_033286.2    | -2.83  | -1.5  | 10.05 | 11.55 | 8.42E-15 | 9.69E-13 |
| ILMN_2206474 | C20ORF39  | NM_024893.1    | -4.06  | -2.02 | 10    | 12.02 | 9.13E-15 | 1.04E-12 |
| ILMN_2382942 | CA12      | NM_001218.3    | -4.56  | -2.19 | 10.02 | 12.2  | 9.81E-15 | 1.11E-12 |
| ILMN_1780334 | KCNJ2     | NM_000891.2    | -6.59  | -2.72 | 8.66  | 11.39 | 1.01E-14 | 1.14E-12 |
| ILMN_1753830 | ETV4      | NM_001986.1    | -6.15  | -2.62 | 8.14  | 10.76 | 1.13E-14 | 1.23E-12 |
| ILMN_1673991 | ATIC      | NM_004044.4    | -3.34  | -1.74 | 11.26 | 13    | 1.13E-14 | 1.23E-12 |
| ILMN_1771051 | RPL29     | NM_000992.2    | -5.17  | -2.37 | 10.13 | 12.5  | 1.17E-14 | 1.26E-12 |
| ILMN_1664630 | CHEK1     | NM_001274.2    | -4.44  | -2.15 | 10.1  | 12.26 | 1.2E-14  | 1.28E-12 |
| ILMN_1669114 | WNK4      | NM_032387.3    | -8.88  | -3.15 | 7.19  | 10.34 | 1.23E-14 | 1.3E-12  |
| ILMN_2349459 | BIRC5     | NM_001168.2    | -3.23  | -1.69 | 10.2  | 11.89 | 1.45E-14 | 1.48E-12 |
| ILMN_1704785 | C10ORF125 | NM_198472.1    | -5.62  | -2.49 | 7.48  | 9.97  | 1.53E-14 | 1.55E-12 |
| ILMN_1725338 | CLDN23    | NM_194284.1    | -4.76  | -2.25 | 8.31  | 10.56 | 1.58E-14 | 1.58E-12 |
| ILMN_2074044 | PLS1      | NM_002670.1    | -3.66  | -1.87 | 8.6   | 10.47 | 1.93E-14 | 1.9E-12  |
| ILMN_1676003 | PNOC      | NM_006228.2    | -4.26  | -2.09 | 9.4   | 11.5  | 2.11E-14 | 2.02E-12 |
| ILMN_1709294 | CDCA8     | NM_018101.2    | -3.46  | -1.79 | 10.21 | 12    | 2.25E-14 | 2.12E-12 |
| ILMN_1722135 | CNGA3     | NM_001298.1    | -3.78  | -1.92 | 10.52 | 12.45 | 2.26E-14 | 2.12E-12 |
| ILMN_1751016 | LONRF2    | NM_198461.1    | -3.01  | -1.59 | 10.68 | 12.27 | 2.27E-14 | 2.12E-12 |
| ILMN_2329914 | SPRY1     | NM_005841.1    | -3.63  | -1.86 | 12.56 | 14.42 | 2.47E-14 | 2.27E-12 |
| ILMN_2119123 | GRPR      | NM_005314.2    | -5.94  | -2.57 | 8.1   | 10.66 | 2.55E-14 | 2.34E-12 |
| ILMN_2363621 | RBBP8     | NM_203291.1    | -2.95  | -1.56 | 11.4  | 12.97 | 2.77E-14 | 2.48E-12 |
| ILMN_1683450 | CDCA5     | NM_080668.2    | -3.18  | -1.67 | 11.9  | 13.57 | 2.78E-14 | 2.48E-12 |
| ILMN_2405521 | MTHFD2    | NM_001040409.1 | -4.41  | -2.14 | 10.39 | 12.53 | 2.94E-14 | 2.61E-12 |
| ILMN_2367743 | TUBG1     | NM_001070.3    | -3.12  | -1.64 | 11.49 | 13.13 | 3.01E-14 | 2.65E-12 |
| ILMN_1746769 | PLA2G3    | NM_015715.2    | -6.28  | -2.65 | 7.36  | 10.01 | 3.08E-14 | 2.7E-12  |
| ILMN_1695880 | LOX       | NM_002317.3    | -5.24  | -2.39 | 9.29  | 11.68 | 3.1E-14  | 2.71E-12 |
| ILMN_1790885 | KCNK10    | NM_021161.3    | -5.50  | -2.46 | 7.45  | 9.91  | 3.24E-14 | 2.81E-12 |
| ILMN_1807423 | IGF2BP3   | NM_006547.2    | -3.01  | -1.59 | 11.76 | 13.35 | 3.49E-14 | 3.01E-12 |
| ILMN_1805737 | PFKP      | NM_002627.3    | -3.51  | -1.81 | 11.41 | 13.21 | 3.51E-14 | 3.01E-12 |
| ILMN_1729455 | EML1      | NM_004434.2    | -3.12  | -1.64 | 11    | 12.63 | 3.62E-14 | 3.05E-12 |
| ILMN_1728972 | FAM64A    | NM_019013.1    | -3.66  | -1.87 | 11.05 | 12.92 | 3.7E-14  | 3.1E-12  |
| ILMN_1678669 | RRM2      | NM_001034.1    | -4.59  | -2.2  | 10.14 | 12.34 | 4.12E-14 | 3.36E-12 |

Supplementary Table 2

|              |           |                |       |       |       |       |          |          |
|--------------|-----------|----------------|-------|-------|-------|-------|----------|----------|
| ILMN_1791232 | SPRED2    | NM_181784.1    | -2.87 | -1.52 | 10.6  | 12.11 | 4.41E-14 | 3.59E-12 |
| ILMN_1661589 | CD151     | NM_004357.3    | -3.29 | -1.72 | 11.84 | 13.56 | 4.42E-14 | 3.59E-12 |
| ILMN_2336609 | SYTL2     | NM_206929.1    | -3.78 | -1.92 | 11.82 | 13.74 | 4.44E-14 | 3.59E-12 |
| ILMN_2091310 | TMEM16A   | NM_018043.4    | -6.92 | -2.79 | 8.86  | 11.65 | 4.51E-14 | 3.63E-12 |
| ILMN_1699695 | TNFRSF21  | NM_014452.3    | -3.20 | -1.68 | 12.61 | 14.29 | 4.51E-14 | 3.63E-12 |
| ILMN_1758164 | STC1      | NM_003155.2    | -3.56 | -1.83 | 10.75 | 12.58 | 4.94E-14 | 3.93E-12 |
| ILMN_1746085 | IGFBP3    | NM_001013398.1 | -6.32 | -2.66 | 11.47 | 14.13 | 5.15E-14 | 4.07E-12 |
| ILMN_2212909 | MELK      | NM_014791.2    | -5.17 | -2.37 | 10.6  | 12.97 | 5.16E-14 | 4.07E-12 |
| ILMN_1781942 | HMMR      | NM_012485.1    | -6.54 | -2.71 | 9.44  | 12.15 | 5.22E-14 | 4.1E-12  |
| ILMN_2396020 | DUSP6     | NM_022652.2    | -4.38 | -2.13 | 9.5   | 11.64 | 5.34E-14 | 4.17E-12 |
| ILMN_1686770 | RPE65     | NM_000329.2    | -4.38 | -2.13 | 9.33  | 11.47 | 5.63E-14 | 4.37E-12 |
| ILMN_1767658 | RRS1      | NM_015169.3    | -3.07 | -1.62 | 11.02 | 12.64 | 5.74E-14 | 4.42E-12 |
| ILMN_1769245 | GLIPR1    | NM_006851.1    | -4.26 | -2.09 | 9.71  | 11.81 | 5.77E-14 | 4.42E-12 |
| ILMN_1683415 | CAMK2D    | NM_172115.1    | -2.91 | -1.54 | 10.8  | 12.34 | 5.8E-14  | 4.43E-12 |
| ILMN_1785474 | ACOT12    | NM_130767.1    | -4.03 | -2.01 | 7.64  | 9.65  | 5.82E-14 | 4.44E-12 |
| ILMN_1699489 | TUBB6     | XM_940079.1    | -3.43 | -1.78 | 10.95 | 12.72 | 6.08E-14 | 4.62E-12 |
| ILMN_1713249 | PHF19     | NM_015651.1    | -4.53 | -2.18 | 9.67  | 11.85 | 6.17E-14 | 4.65E-12 |
| ILMN_1793476 | PRKCDBP   | NM_145040.2    | -6.87 | -2.78 | 8.26  | 11.04 | 6.19E-14 | 4.65E-12 |
| ILMN_1701875 | ZYX       | NM_003461.4    | -3.23 | -1.69 | 12.15 | 13.84 | 6.42E-14 | 4.77E-12 |
| ILMN_2389876 | TGFB111   | NM_015927.3    | -3.27 | -1.71 | 10.37 | 12.08 | 6.69E-14 | 4.92E-12 |
| ILMN_1776121 | MGC42367  | NM_207362.1    | -4.72 | -2.24 | 10.03 | 12.27 | 6.76E-14 | 4.95E-12 |
| ILMN_1663390 | CDC20     | NM_001255.1    | -4.69 | -2.23 | 11.55 | 13.78 | 6.79E-14 | 4.96E-12 |
| ILMN_1797596 | LOC653170 | XM_926321.1    | -6.02 | -2.59 | 8.35  | 10.93 | 6.89E-14 | 5.01E-12 |
| ILMN_1713679 | DSU       | NM_018000.1    | -4.47 | -2.16 | 8.37  | 10.53 | 7.15E-14 | 5.18E-12 |
| ILMN_1683755 | SOX13     | NM_005686.2    | -4.20 | -2.07 | 8.74  | 10.81 | 7.25E-14 | 5.23E-12 |
| ILMN_2384158 | CNGA3     | NM_001298.1    | -3.68 | -1.88 | 10.28 | 12.16 | 7.29E-14 | 5.24E-12 |
| ILMN_1697220 | NT5E      | NM_002526.1    | -7.11 | -2.83 | 9.9   | 12.73 | 7.46E-14 | 5.34E-12 |
| ILMN_1710962 | TMEM97    | NM_014573.1    | -2.77 | -1.47 | 12.67 | 14.13 | 7.71E-14 | 5.47E-12 |
| ILMN_1778444 | FKBP5     | NM_004117.2    | -3.36 | -1.75 | 9.63  | 11.38 | 7.91E-14 | 5.59E-12 |
| ILMN_1758392 | ANKS1B    | NM_181670.2    | -3.63 | -1.86 | 11.33 | 13.19 | 8.23E-14 | 5.77E-12 |
| ILMN_1699768 | CBLN4     | NM_080617.4    | -4.03 | -2.01 | 9.38  | 11.4  | 9.36E-14 | 6.47E-12 |
| ILMN_1796589 | TRIP13    | NM_004237.2    | -5.31 | -2.41 | 10.48 | 12.89 | 9.43E-14 | 6.5E-12  |
| ILMN_1806037 | TK1       | NM_003258.1    | -3.53 | -1.82 | 9.77  | 11.59 | 1E-13    | 6.88E-12 |
| ILMN_1671404 | SVIL      | NM_003174.2    | -4.82 | -2.27 | 10.75 | 13.02 | 1.04E-13 | 7.12E-12 |
| ILMN_1670238 | CDC45L    | NM_003504.3    | -2.79 | -1.48 | 10.93 | 12.41 | 1.08E-13 | 7.33E-12 |
| ILMN_2053415 | LDLR      | NM_000527.2    | -3.46 | -1.79 | 12.33 | 14.13 | 1.12E-13 | 7.55E-12 |
| ILMN_1682717 | IER3      | NM_052815.1    | -6.36 | -2.67 | 9.04  | 11.71 | 1.12E-13 | 7.57E-12 |
| ILMN_2053281 | C14ORF149 | NM_144581.1    | -4.50 | -2.17 | 10.15 | 12.32 | 1.13E-13 | 7.61E-12 |
| ILMN_2411745 | EML1      | NM_004434.2    | -3.14 | -1.65 | 10.66 | 12.31 | 1.16E-13 | 7.77E-12 |
| ILMN_2146418 | CRIM1     | NM_016441.1    | -3.43 | -1.78 | 9.59  | 11.38 | 1.21E-13 | 8.02E-12 |
| ILMN_1757631 | MGC3101   | NM_024043.2    | -3.66 | -1.87 | 10.6  | 12.48 | 1.23E-13 | 8.12E-12 |
| ILMN_2041190 | F2RL1     | NM_005242.3    | -5.70 | -2.51 | 9.18  | 11.7  | 1.24E-13 | 8.15E-12 |
| ILMN_1780769 | TUBB2C    | NM_006088.5    | -3.34 | -1.74 | 12.86 | 14.6  | 1.37E-13 | 8.84E-12 |

Supplementary Table 2

|              |           |                |       |       |       |       |          |          |
|--------------|-----------|----------------|-------|-------|-------|-------|----------|----------|
| ILMN_1794552 | GAP43     | NM_002045.2    | -4.63 | -2.21 | 12.48 | 14.68 | 1.42E-13 | 9.11E-12 |
| ILMN_1771039 | GTSE1     | NM_016426.4    | -3.66 | -1.87 | 9.26  | 11.13 | 1.44E-13 | 9.24E-12 |
| ILMN_2143795 | MGC4677   | NM_052871.3    | -3.68 | -1.88 | 12.42 | 14.3  | 1.48E-13 | 9.45E-12 |
| ILMN_1664855 | PPP1R14C  | NM_030949.1    | -3.86 | -1.95 | 9.06  | 11.01 | 1.49E-13 | 9.5E-12  |
| ILMN_1782419 | GNG11     | NM_004126.2    | -3.61 | -1.85 | 12.5  | 14.35 | 1.71E-13 | 1.08E-11 |
| ILMN_2371169 | ZYX       | NM_003461.4    | -3.07 | -1.62 | 11.08 | 12.7  | 1.73E-13 | 1.08E-11 |
| ILMN_1714700 | TRIB2     | NM_021643.1    | -3.76 | -1.91 | 12.09 | 14    | 1.76E-13 | 1.1E-11  |
| ILMN_1725510 | DHCR24    | NM_014762.2    | -3.86 | -1.95 | 9.8   | 11.76 | 1.93E-13 | 1.2E-11  |
| ILMN_1805543 | ADAMTS9   | NM_182920.1    | -4.53 | -2.18 | 9.67  | 11.85 | 1.96E-13 | 1.21E-11 |
| ILMN_2134974 | RAB38     | NM_022337.1    | -3.01 | -1.59 | 9.57  | 11.16 | 1.98E-13 | 1.22E-11 |
| ILMN_2237428 | SCD5      | NM_001037582.1 | -2.55 | -1.35 | 12.93 | 14.27 | 2.02E-13 | 1.24E-11 |
| ILMN_1680955 | AURKA     | NM_198434.1    | -2.64 | -1.4  | 11.53 | 12.93 | 2.07E-13 | 1.26E-11 |
| ILMN_1789624 | TPM2      | NM_003289.3    | -4.00 | -2    | 8.36  | 10.35 | 2.26E-13 | 1.37E-11 |
| ILMN_1749829 | DLG7      | NM_014750.3    | -4.50 | -2.17 | 9.91  | 12.08 | 2.26E-13 | 1.37E-11 |
| ILMN_2088124 | TMEM154   | NM_152680.1    | -4.82 | -2.27 | 7.57  | 9.84  | 2.33E-13 | 1.41E-11 |
| ILMN_1703906 | DKFZP762E | NM_018410.2    | -3.76 | -1.91 | 10.14 | 12.05 | 2.4E-13  | 1.45E-11 |
| ILMN_1726809 | BHLHB3    | NM_030762.1    | -2.99 | -1.58 | 9.97  | 11.55 | 2.48E-13 | 1.49E-11 |
| ILMN_1691376 | JAG1      | NM_000214.1    | -4.47 | -2.16 | 10.7  | 12.86 | 2.61E-13 | 1.54E-11 |
| ILMN_1745964 | IRAK2     | NM_001570.3    | -4.76 | -2.25 | 8.79  | 11.03 | 2.68E-13 | 1.58E-11 |
| ILMN_2351466 | HNT       | NM_001048209.1 | -2.46 | -1.3  | 11.21 | 12.52 | 2.84E-13 | 1.67E-11 |
| ILMN_1716687 | TPM1      | NM_000366.5    | -2.64 | -1.4  | 12.11 | 13.51 | 2.92E-13 | 1.71E-11 |
| ILMN_2213759 | DBX2      | NM_001004329.2 | -3.29 | -1.72 | 9.36  | 11.08 | 2.93E-13 | 1.71E-11 |
| ILMN_1786125 | CCNA2     | NM_001237.2    | -3.32 | -1.73 | 11.12 | 12.85 | 2.94E-13 | 1.72E-11 |
| ILMN_2370976 | FER1L3    | NM_013451.2    | -4.29 | -2.1  | 9.71  | 11.81 | 2.97E-13 | 1.72E-11 |
| ILMN_1688480 | CCND1     | NM_053056.1    | -4.08 | -2.03 | 12.2  | 14.23 | 3.67E-13 | 2.07E-11 |
| ILMN_1727567 | OLIG2     | NM_005806.2    | -3.16 | -1.66 | 11.73 | 13.38 | 3.67E-13 | 2.07E-11 |
| ILMN_2397028 | SERPINB8  | NM_002640.3    | -3.48 | -1.8  | 9.16  | 10.96 | 4E-13    | 2.24E-11 |
| ILMN_1673363 | CD97      | NM_078481.2    | -3.18 | -1.67 | 10.01 | 11.68 | 4.13E-13 | 2.29E-11 |
| ILMN_1696749 | LMNA      | NM_005572.2    | -2.79 | -1.48 | 11.83 | 13.32 | 4.2E-13  | 2.31E-11 |
| ILMN_2383305 | GPATCH4   | NM_182679.1    | -3.03 | -1.6  | 11.01 | 12.6  | 4.3E-13  | 2.36E-11 |
| ILMN_1756982 | CLIC1     | NM_001288.4    | -2.57 | -1.36 | 13.55 | 14.91 | 4.6E-13  | 2.49E-11 |
| ILMN_2341661 | ETV4      | NM_001986.1    | -6.50 | -2.7  | 7.72  | 10.42 | 4.62E-13 | 2.5E-11  |
| ILMN_1801939 | CCNB2     | NM_004701.2    | -3.16 | -1.66 | 11.4  | 13.06 | 4.73E-13 | 2.55E-11 |
| ILMN_1810228 | TTF2      | NM_003594.3    | -5.24 | -2.39 | 8.59  | 10.98 | 4.8E-13  | 2.58E-11 |
| ILMN_1684045 | CDCA4     | NM_017955.2    | -2.60 | -1.38 | 9.94  | 11.32 | 5.14E-13 | 2.73E-11 |
| ILMN_2301083 | UBE2C     | NM_181800.1    | -2.85 | -1.51 | 12.5  | 14.01 | 5.22E-13 | 2.76E-11 |
| ILMN_2160929 | FEN1      | NM_004111.4    | -2.35 | -1.23 | 12.63 | 13.86 | 5.26E-13 | 2.77E-11 |
| ILMN_2311537 | HMGA1     | NM_145899.1    | -3.92 | -1.97 | 11.63 | 13.6  | 5.52E-13 | 2.88E-11 |
| ILMN_1728934 | PRC1      | NM_003981.2    | -2.69 | -1.43 | 12.11 | 13.54 | 5.6E-13  | 2.91E-11 |
| ILMN_1789196 | TPM2      | NM_213674.1    | -4.50 | -2.17 | 11.86 | 14.04 | 5.84E-13 | 3.01E-11 |
| ILMN_1705814 | LOC144501 | NM_182507.1    | -5.66 | -2.5  | 8.02  | 10.51 | 6.03E-13 | 3.09E-11 |
| ILMN_2360710 | TPM1      | NM_001018004.1 | -2.68 | -1.42 | 12.7  | 14.12 | 6.22E-13 | 3.17E-11 |
| ILMN_1740291 | POLQ      | NM_199420.2    | -4.72 | -2.24 | 8.99  | 11.23 | 6.9E-13  | 3.46E-11 |

Supplementary Table 2

|              |           |                |       |       |       |       |          |          |
|--------------|-----------|----------------|-------|-------|-------|-------|----------|----------|
| ILMN_1720270 | CDR2      | NM_001802.1    | -2.38 | -1.25 | 10.37 | 11.62 | 6.94E-13 | 3.47E-11 |
| ILMN_1668411 | FHL2      | NM_001450.3    | -2.51 | -1.33 | 12.22 | 13.55 | 7.14E-13 | 3.57E-11 |
| ILMN_2384056 | GPR30     | NM_001039966.1 | -2.83 | -1.5  | 9.21  | 10.71 | 7.19E-13 | 3.59E-11 |
| ILMN_1653055 | SOX3      | NM_005634.2    | -5.78 | -2.53 | 9.47  | 12    | 8.55E-13 | 4.22E-11 |
| ILMN_1781943 | C20ORF129 | NM_030919.1    | -3.29 | -1.72 | 9.87  | 11.58 | 8.71E-13 | 4.29E-11 |
| ILMN_1689306 | TMC7      | NM_024847.2    | -2.85 | -1.51 | 8.7   | 10.21 | 8.76E-13 | 4.3E-11  |
| ILMN_1789507 | COL11A1   | NM_080629.1    | -3.34 | -1.74 | 11.34 | 13.08 | 8.78E-13 | 4.31E-11 |
| ILMN_1695414 | ASF1B     | NM_018154.2    | -3.23 | -1.69 | 10.13 | 11.82 | 8.83E-13 | 4.32E-11 |
| ILMN_1810289 | FER1L3    | NM_013451.2    | -3.94 | -1.98 | 10.83 | 12.81 | 8.97E-13 | 4.36E-11 |
| ILMN_1799667 | KIF4A     | NM_012310.2    | -3.25 | -1.7  | 9.57  | 11.28 | 9.77E-13 | 4.7E-11  |
| ILMN_2347949 | G6PD      | NM_000402.3    | -2.66 | -1.41 | 11.96 | 13.36 | 1.02E-12 | 4.89E-11 |
| ILMN_1802292 | WDFY2     | NM_052950.2    | -3.25 | -1.7  | 10.08 | 11.77 | 1.03E-12 | 4.9E-11  |
| ILMN_2340974 | ANKS1B    | NM_020140.2    | -3.89 | -1.96 | 9.42  | 11.38 | 1.06E-12 | 5.03E-11 |
| ILMN_2375879 | VEGFA     | NM_003376.4    | -4.32 | -2.11 | 8.93  | 11.04 | 1.06E-12 | 5.03E-11 |
| ILMN_2215730 | GABRA5    | NM_000810.2    | -3.51 | -1.81 | 9.13  | 10.93 | 1.07E-12 | 5.06E-11 |
| ILMN_2225537 | LTB4DH    | NM_012212.2    | -2.41 | -1.27 | 11.05 | 12.32 | 1.09E-12 | 5.16E-11 |
| ILMN_1683859 | SLC7A1    | NM_003045.3    | -3.68 | -1.88 | 10.45 | 12.33 | 1.1E-12  | 5.18E-11 |
| ILMN_1720083 | EHD4      | NM_139265.2    | -2.55 | -1.35 | 10.03 | 11.38 | 1.1E-12  | 5.18E-11 |
| ILMN_1658094 | ZNF365    | NM_014951.1    | -2.53 | -1.34 | 10.31 | 11.65 | 1.16E-12 | 5.4E-11  |
| ILMN_2165867 | DHCR7     | NM_001360.2    | -3.76 | -1.91 | 11.5  | 13.4  | 1.16E-12 | 5.41E-11 |
| ILMN_2319544 | CAMK2D    | NM_172128.1    | -2.69 | -1.43 | 10.72 | 12.15 | 1.17E-12 | 5.43E-11 |
| ILMN_1698934 | CMTM7     | NM_138410.2    | -4.11 | -2.04 | 7.9   | 9.93  | 1.18E-12 | 5.43E-11 |
| ILMN_1741054 | SLC5A6    | NM_021095.1    | -2.55 | -1.35 | 10.64 | 11.99 | 1.19E-12 | 5.45E-11 |
| ILMN_1752046 | LNK       | NM_005475.1    | -3.14 | -1.65 | 10.85 | 12.5  | 1.21E-12 | 5.58E-11 |
| ILMN_1732799 | CD34      | NM_001773.1    | -3.76 | -1.91 | 7.87  | 9.78  | 1.27E-12 | 5.82E-11 |
| ILMN_1676213 | SRPX2     | NM_014467.1    | -4.11 | -2.04 | 9.28  | 11.32 | 1.28E-12 | 5.83E-11 |
| ILMN_1714170 | SPSB1     | NM_025106.2    | -3.66 | -1.87 | 8.35  | 10.22 | 1.28E-12 | 5.83E-11 |
| ILMN_1685397 | ITGA3     | NM_002204.1    | -3.14 | -1.65 | 11.02 | 12.67 | 1.29E-12 | 5.86E-11 |
| ILMN_1745420 | PHF19     | NM_001009936.1 | -4.38 | -2.13 | 8.26  | 10.39 | 1.3E-12  | 5.89E-11 |
| ILMN_1657550 | MVD       | NM_002461.1    | -2.99 | -1.58 | 10.34 | 11.92 | 1.32E-12 | 5.97E-11 |
| ILMN_2136446 | CTNNA1    | NM_003798.1    | -4.23 | -2.08 | 9.81  | 11.89 | 1.37E-12 | 6.19E-11 |
| ILMN_1693985 | JPH1      | NM_020647.2    | -4.20 | -2.07 | 8.51  | 10.58 | 1.41E-12 | 6.34E-11 |
| ILMN_1710408 | LGR4      | NM_018490.1    | -4.63 | -2.21 | 8.96  | 11.17 | 1.42E-12 | 6.35E-11 |
| ILMN_1706217 | TLR4      | NM_138557.1    | -4.56 | -2.19 | 8.67  | 10.86 | 1.42E-12 | 6.35E-11 |
| ILMN_2324056 | GNL3      | NM_206826.1    | -2.39 | -1.26 | 11.63 | 12.88 | 1.47E-12 | 6.55E-11 |
| ILMN_2403965 | TXNDC5    | NM_022085.3    | -2.89 | -1.53 | 10.51 | 12.05 | 1.47E-12 | 6.55E-11 |
| ILMN_2383349 | STEAP3    | NM_018234.2    | -3.03 | -1.6  | 10.45 | 12.04 | 1.48E-12 | 6.58E-11 |
| ILMN_2358886 | EDN3      | NM_207033.1    | -4.92 | -2.3  | 7.76  | 10.05 | 1.5E-12  | 6.66E-11 |
| ILMN_2368856 | KCNIP1    | NM_014592.2    | -4.59 | -2.2  | 9.65  | 11.85 | 1.68E-12 | 7.35E-11 |
| ILMN_2357438 | AURKA     | NM_198434.1    | -2.60 | -1.38 | 11.37 | 12.75 | 1.75E-12 | 7.61E-11 |
| ILMN_2374352 | DBNDD1    | NM_001042610.1 | -2.57 | -1.36 | 12.05 | 13.4  | 1.77E-12 | 7.71E-11 |
| ILMN_1768357 | RTN1      | NM_021136.2    | -3.84 | -1.94 | 9.59  | 11.53 | 1.84E-12 | 7.94E-11 |
| ILMN_1809522 | BTBD14A   | NM_144653.3    | -3.86 | -1.95 | 10.09 | 12.04 | 1.87E-12 | 8.05E-11 |

Supplementary Table 2

|              |          |                |       |       |       |       |          |          |
|--------------|----------|----------------|-------|-------|-------|-------|----------|----------|
| ILMN_1690754 | SVIL     | NM_003174.2    | -4.41 | -2.14 | 8.44  | 10.58 | 1.92E-12 | 8.25E-11 |
| ILMN_1746888 | PCOLCE2  | NM_013363.2    | -3.58 | -1.84 | 10.07 | 11.91 | 2.01E-12 | 8.6E-11  |
| ILMN_1793263 | C1ORF94  | NM_032884.2    | -4.41 | -2.14 | 8.36  | 10.5  | 2.03E-12 | 8.64E-11 |
| ILMN_1758978 | KLHL4    | NM_057162.1    | -2.75 | -1.46 | 9.93  | 11.39 | 2.09E-12 | 8.86E-11 |
| ILMN_2392472 | CENPA    | NM_001042426.1 | -2.91 | -1.54 | 9.46  | 11    | 2.11E-12 | 8.94E-11 |
| ILMN_1702197 | C9ORF140 | NM_178448.2    | -3.16 | -1.66 | 9.71  | 11.38 | 2.14E-12 | 9.03E-11 |
| ILMN_1702636 | TUBB6    | NM_032525.1    | -3.18 | -1.67 | 10.7  | 12.37 | 2.19E-12 | 9.21E-11 |
| ILMN_1728049 | S100A16  | NM_080388.1    | -2.58 | -1.37 | 13.02 | 14.39 | 2.21E-12 | 9.3E-11  |
| ILMN_2355738 | INCENP   | NM_001040694.1 | -2.25 | -1.17 | 9.8   | 10.97 | 2.3E-12  | 9.58E-11 |
| ILMN_1695658 | KIF20A   | NM_005733.1    | -3.27 | -1.71 | 10.89 | 12.6  | 2.31E-12 | 9.61E-11 |
| ILMN_1724407 | TACC3    | NM_006342.1    | -3.36 | -1.75 | 9.3   | 11.04 | 2.31E-12 | 9.61E-11 |
| ILMN_2314169 | PTHLH    | NM_198965.1    | -3.23 | -1.69 | 8.65  | 10.33 | 2.32E-12 | 9.63E-11 |
| ILMN_1794522 | EIF5A    | NM_001970.3    | -2.25 | -1.17 | 13.05 | 14.22 | 2.41E-12 | 9.96E-11 |
| ILMN_2257432 | RAD51    | NM_002875.2    | -2.48 | -1.31 | 8.71  | 10.02 | 2.46E-12 | 1.02E-10 |
| ILMN_2151114 | VSNL1    | NM_003385.4    | -5.46 | -2.45 | 8.06  | 10.51 | 2.51E-12 | 1.03E-10 |
| ILMN_2341229 | CD34     | NM_001773.2    | -3.58 | -1.84 | 8.86  | 10.7  | 2.56E-12 | 1.05E-10 |
| ILMN_1713901 | KDELR3   | NM_016657.1    | -3.03 | -1.6  | 8.8   | 10.4  | 2.64E-12 | 1.08E-10 |
| ILMN_1668996 | C1QBP    | NM_001212.3    | -2.08 | -1.06 | 13.24 | 14.3  | 2.67E-12 | 1.09E-10 |
| ILMN_1695110 | BCAT2    | NM_001190.2    | -2.66 | -1.41 | 10.47 | 11.88 | 2.75E-12 | 1.12E-10 |
| ILMN_1806754 | GLDC     | NM_000170.1    | -2.79 | -1.48 | 12.8  | 14.28 | 2.79E-12 | 1.13E-10 |
| ILMN_1787280 | C1ORF135 | NM_024037.1    | -3.18 | -1.67 | 8.26  | 9.93  | 3.12E-12 | 1.25E-10 |
| ILMN_2068104 | TFPI2    | NM_006528.2    | -4.66 | -2.22 | 7.09  | 9.31  | 3.17E-12 | 1.26E-10 |
| ILMN_2355665 | MTP18    | NM_016498.3    | -3.56 | -1.83 | 9.95  | 11.78 | 3.31E-12 | 1.31E-10 |
| ILMN_1793241 | SRD5A1   | NM_001047.1    | -2.36 | -1.24 | 10.65 | 11.9  | 3.5E-12  | 1.38E-10 |
| ILMN_1728202 | TMEM22   | NM_025246.1    | -2.36 | -1.24 | 9.82  | 11.06 | 3.54E-12 | 1.39E-10 |
| ILMN_2149226 | CAV1     | NM_001753.3    | -3.63 | -1.86 | 10.59 | 12.45 | 3.56E-12 | 1.39E-10 |
| ILMN_1755937 | ANXA2    | NM_001002857.1 | -2.77 | -1.47 | 10.13 | 11.6  | 3.7E-12  | 1.44E-10 |
| ILMN_1725791 | PTPLA    | NM_014241.2    | -2.62 | -1.39 | 11.07 | 12.45 | 3.88E-12 | 1.5E-10  |
| ILMN_1651237 | CDT1     | NM_030928.2    | -3.12 | -1.64 | 9.79  | 11.44 | 3.99E-12 | 1.53E-10 |
| ILMN_1811933 | SHMT1    | NM_148918.1    | -2.25 | -1.17 | 10.36 | 11.53 | 4.03E-12 | 1.55E-10 |
| ILMN_2219466 | APOBEC3B | NM_004900.3    | -3.66 | -1.87 | 8.04  | 9.91  | 4.12E-12 | 1.57E-10 |
| ILMN_1724533 | LY96     | NM_015364.2    | -4.79 | -2.26 | 9.15  | 11.41 | 4.27E-12 | 1.62E-10 |
| ILMN_1658995 | ACOT9    | NM_001033583.1 | -2.35 | -1.23 | 10.9  | 12.13 | 4.27E-12 | 1.62E-10 |
| ILMN_1784860 | RFC3     | NM_002915.2    | -2.66 | -1.41 | 10.22 | 11.63 | 4.33E-12 | 1.63E-10 |
| ILMN_1780667 | WDR51A   | NM_015426.2    | -3.10 | -1.63 | 10.77 | 12.4  | 4.45E-12 | 1.68E-10 |
| ILMN_1774336 | POLE2    | NM_002692.2    | -2.81 | -1.49 | 9.64  | 11.13 | 4.46E-12 | 1.68E-10 |
| ILMN_1810051 | EPB41L4B | NM_019114.2    | -3.51 | -1.81 | 8.38  | 10.18 | 4.64E-12 | 1.74E-10 |
| ILMN_1806040 | TYMS     | NM_001071.1    | -2.75 | -1.46 | 12.66 | 14.11 | 4.77E-12 | 1.78E-10 |
| ILMN_2094396 | LRRC8C   | NM_032270.2    | -3.53 | -1.82 | 7.74  | 9.55  | 4.84E-12 | 1.8E-10  |
| ILMN_1811472 | KIF23    | NM_004856.4    | -4.11 | -2.04 | 9.52  | 11.56 | 4.91E-12 | 1.82E-10 |
| ILMN_2374633 | ZWILCH   | NR_003105.1    | -2.39 | -1.26 | 11.65 | 12.92 | 5.11E-12 | 1.88E-10 |
| ILMN_1798379 | HNT      | NM_016522.2    | -3.18 | -1.67 | 9.71  | 11.39 | 5.11E-12 | 1.88E-10 |
| ILMN_1712112 | DSCR1    | NM_203418.1    | -2.83 | -1.5  | 12.08 | 13.58 | 5.12E-12 | 1.88E-10 |



Supplementary Table 2

|              |          |                |       |       |       |       |          |          |
|--------------|----------|----------------|-------|-------|-------|-------|----------|----------|
| ILMN_1686227 | GNA14    | NM_004297.2    | -3.20 | -1.68 | 7.88  | 9.56  | 5.33E-12 | 1.96E-10 |
| ILMN_1722491 | APRT     | NM_000485.2    | -2.73 | -1.45 | 11.67 | 13.12 | 5.4E-12  | 1.98E-10 |
| ILMN_1794501 | HAS3     | NM_005329.2    | -3.25 | -1.7  | 8.07  | 9.77  | 5.42E-12 | 1.98E-10 |
| ILMN_1752953 | BCL2L12  | NM_052842.2    | -2.75 | -1.46 | 10.15 | 11.61 | 5.46E-12 | 2E-10    |
| ILMN_2090105 | TAGLN2   | NM_003564.1    | -2.46 | -1.3  | 12.94 | 14.24 | 5.61E-12 | 2.04E-10 |
| ILMN_1709486 | SRPX     | NM_006307.2    | -2.30 | -1.2  | 13.17 | 14.37 | 5.7E-12  | 2.07E-10 |
| ILMN_1662198 | RANGAP1  | NM_002883.2    | -2.28 | -1.19 | 12.35 | 13.54 | 5.72E-12 | 2.08E-10 |
| ILMN_1715583 | BOP1     | NM_015201.3    | -2.13 | -1.09 | 12.17 | 13.26 | 5.78E-12 | 2.09E-10 |
| ILMN_2212763 | ICAM3    | NM_002162.2    | -3.10 | -1.63 | 8     | 9.64  | 5.89E-12 | 2.13E-10 |
| ILMN_2215119 | SYNJ2    | NM_003898.2    | -3.94 | -1.98 | 8.92  | 10.9  | 5.94E-12 | 2.14E-10 |
| ILMN_1703205 | EDN3     | NM_207034.1    | -4.86 | -2.28 | 7.15  | 9.43  | 5.99E-12 | 2.15E-10 |
| ILMN_2396982 | BCL2L12  | NM_001040668.1 | -2.87 | -1.52 | 10.28 | 11.8  | 6E-12    | 2.15E-10 |
| ILMN_1721022 | SHC1     | NM_003029.3    | -2.99 | -1.58 | 12.46 | 14.04 | 6.19E-12 | 2.21E-10 |
| ILMN_1695731 | TUBG1    | NM_001070.3    | -2.87 | -1.52 | 11.98 | 13.5  | 6.22E-12 | 2.22E-10 |
| ILMN_1704398 | FZD9     | NM_003508.2    | -2.28 | -1.19 | 9.62  | 10.81 | 6.42E-12 | 2.28E-10 |
| ILMN_1727459 | ORC1L    | NM_004153.2    | -3.66 | -1.87 | 8.5   | 10.37 | 6.61E-12 | 2.34E-10 |
| ILMN_2111187 | ELOVL6   | NM_024090.1    | -3.01 | -1.59 | 11.71 | 13.3  | 6.93E-12 | 2.45E-10 |
| ILMN_1786444 | LPL      | NM_000237.1    | -5.24 | -2.39 | 7.83  | 10.22 | 6.94E-12 | 2.45E-10 |
| ILMN_1772521 | MTHFD1L  | NM_015440.3    | -2.91 | -1.54 | 10.8  | 12.34 | 6.96E-12 | 2.45E-10 |
| ILMN_1797735 | C1ORF21  | NM_030806.3    | -2.64 | -1.4  | 10.05 | 11.45 | 7.2E-12  | 2.51E-10 |
| ILMN_2399588 | THSD1    | NM_199263.1    | -2.64 | -1.4  | 8.78  | 10.18 | 7.55E-12 | 2.62E-10 |
| ILMN_2070072 | RPS7     | NM_001011.3    | -3.66 | -1.87 | 11.04 | 12.92 | 7.6E-12  | 2.64E-10 |
| ILMN_1700337 | TROAP    | NM_005480.2    | -2.60 | -1.38 | 9.94  | 11.33 | 7.61E-12 | 2.64E-10 |
| ILMN_1692163 | NSDHL    | NM_015922.1    | -2.45 | -1.29 | 12.02 | 13.31 | 7.71E-12 | 2.67E-10 |
| ILMN_1675387 | LIMS1    | NM_004987.3    | -2.75 | -1.46 | 10.36 | 11.81 | 7.75E-12 | 2.68E-10 |
| ILMN_1737394 | LMNA     | NM_005572.2    | -3.05 | -1.61 | 11.28 | 12.89 | 7.92E-12 | 2.73E-10 |
| ILMN_2082865 | TM4SF11  | NM_015993.1    | -4.08 | -2.03 | 7.59  | 9.63  | 8E-12    | 2.75E-10 |
| ILMN_1798123 | ELOVL1   | NM_022821.2    | -2.46 | -1.3  | 9.89  | 11.19 | 8E-12    | 2.75E-10 |
| ILMN_1696601 | VAR5     | NM_006295.1    | -2.50 | -1.32 | 11.47 | 12.79 | 8.12E-12 | 2.78E-10 |
| ILMN_1771966 | BCCIP    | NM_078468.1    | -2.35 | -1.23 | 11.67 | 12.9  | 8.16E-12 | 2.79E-10 |
| ILMN_1773119 | CCNF     | NM_001761.1    | -2.73 | -1.45 | 10.64 | 12.09 | 8.38E-12 | 2.85E-10 |
| ILMN_1712431 | FAM113B  | NM_138371.1    | -2.55 | -1.35 | 8.72  | 10.07 | 8.44E-12 | 2.87E-10 |
| ILMN_1676192 | SLC13A5  | NM_177550.2    | -3.10 | -1.63 | 7.9   | 9.53  | 8.65E-12 | 2.93E-10 |
| ILMN_1727043 | GLT25D1  | NM_024656.2    | -2.50 | -1.32 | 11.47 | 12.79 | 8.82E-12 | 2.97E-10 |
| ILMN_1668814 | C22ORF18 | NM_024053.3    | -3.34 | -1.74 | 9.98  | 11.73 | 8.98E-12 | 3.02E-10 |
| ILMN_2370365 | RFC4     | NM_002916.3    | -2.28 | -1.19 | 11.73 | 12.92 | 9.14E-12 | 3.07E-10 |
| ILMN_1667994 | AMD1     | NM_001634.4    | -2.75 | -1.46 | 10.99 | 12.45 | 9.3E-12  | 3.1E-10  |
| ILMN_1665483 | KIAA0020 | NM_014878.3    | -2.14 | -1.1  | 11.56 | 12.66 | 9.32E-12 | 3.1E-10  |
| ILMN_2383306 | GPATCH4  | NM_182679.1    | -3.10 | -1.63 | 9.07  | 10.7  | 9.58E-12 | 3.18E-10 |
| ILMN_1660806 | CSRP2    | NM_001321.1    | -3.05 | -1.61 | 12.13 | 13.74 | 9.6E-12  | 3.18E-10 |
| ILMN_1805192 | KIAA1754 | NM_033397.2    | -2.38 | -1.25 | 11.43 | 12.67 | 9.62E-12 | 3.18E-10 |
| ILMN_1775432 | CSMD2    | NM_052896.2    | -4.82 | -2.27 | 8.48  | 10.75 | 9.74E-12 | 3.22E-10 |
| ILMN_1801105 | PRKCD    | NM_212539.1    | -2.45 | -1.29 | 8.31  | 9.6   | 9.93E-12 | 3.27E-10 |

Supplementary Table 2

|              |          |                |       |       |       |       |          |          |
|--------------|----------|----------------|-------|-------|-------|-------|----------|----------|
| ILMN_1676361 | ARHGAP22 | NM_021226.2    | -2.87 | -1.52 | 9.05  | 10.57 | 1.04E-11 | 3.43E-10 |
| ILMN_1673721 | EXO1     | NM_003686.3    | -3.23 | -1.69 | 9.71  | 11.41 | 1.05E-11 | 3.44E-10 |
| ILMN_1753639 | MTAP     | NM_002451.3    | -2.23 | -1.16 | 10.78 | 11.93 | 1.1E-11  | 3.58E-10 |
| ILMN_1734194 | EXOSC3   | NM_016042.2    | -2.31 | -1.21 | 10.75 | 11.96 | 1.13E-11 | 3.66E-10 |
| ILMN_2073604 | EBP      | NM_006579.1    | -3.05 | -1.61 | 10.84 | 12.45 | 1.16E-11 | 3.74E-10 |
| ILMN_1675848 | MRCL3    | NM_006471.2    | -2.69 | -1.43 | 12.85 | 14.27 | 1.2E-11  | 3.86E-10 |
| ILMN_1674706 | MTHFD2   | NM_006636.2    | -4.08 | -2.03 | 9.24  | 11.27 | 1.21E-11 | 3.87E-10 |
| ILMN_2082585 | SNAI2    | NM_003068.3    | -5.39 | -2.43 | 8.54  | 10.98 | 1.22E-11 | 3.92E-10 |
| ILMN_1804415 | LOC57228 | NM_001031628.1 | -2.87 | -1.52 | 9.23  | 10.75 | 1.25E-11 | 3.99E-10 |
| ILMN_1698885 | PTPRT    | NM_133170.2    | -3.86 | -1.95 | 8.37  | 10.32 | 1.25E-11 | 3.99E-10 |
| ILMN_1794875 | HMFN0839 | NM_032717.3    | -4.89 | -2.29 | 8.72  | 11.01 | 1.34E-11 | 4.28E-10 |
| ILMN_1722089 | IBRDC1   | NM_152553.2    | -2.97 | -1.57 | 8.61  | 10.18 | 1.35E-11 | 4.29E-10 |
| ILMN_1798210 | E2F7     | NM_203394.1    | -4.08 | -2.03 | 9.36  | 11.39 | 1.36E-11 | 4.32E-10 |
| ILMN_2042771 | PTTG1    | NM_004219.2    | -2.11 | -1.08 | 13.23 | 14.31 | 1.37E-11 | 4.35E-10 |
| ILMN_1679995 | MPP6     | NM_016447.2    | -2.35 | -1.23 | 9.5   | 10.73 | 1.39E-11 | 4.38E-10 |
| ILMN_1724489 | RFC4     | NM_002916.3    | -2.10 | -1.07 | 11.09 | 12.16 | 1.42E-11 | 4.46E-10 |
| ILMN_1725485 | RGS17    | NM_012419.4    | -2.08 | -1.06 | 11.8  | 12.85 | 1.45E-11 | 4.53E-10 |
| ILMN_1741133 | NME1     | NM_198175.1    | -2.19 | -1.13 | 14.19 | 15.32 | 1.48E-11 | 4.62E-10 |
| ILMN_1725271 | GPR3     | NM_005281.2    | -3.29 | -1.72 | 8.05  | 9.77  | 1.49E-11 | 4.62E-10 |
| ILMN_1808391 | DUSP4    | NM_001394.5    | -3.58 | -1.84 | 9.5   | 11.35 | 1.5E-11  | 4.65E-10 |
| ILMN_2301722 | PDE8B    | NM_001029851.1 | -2.81 | -1.49 | 11.46 | 12.96 | 1.57E-11 | 4.85E-10 |
| ILMN_1778561 | WEE1     | NM_003390.2    | -2.43 | -1.28 | 11.26 | 12.55 | 1.62E-11 | 4.97E-10 |
| ILMN_1712452 | MPHOSPH1 | NM_016195.2    | -2.64 | -1.4  | 10.22 | 11.63 | 1.64E-11 | 5.03E-10 |
| ILMN_1804735 | CBS      | NM_000071.1    | -2.25 | -1.17 | 11.66 | 12.83 | 1.7E-11  | 5.19E-10 |
| ILMN_2379130 | IRAK1    | NM_001025243.1 | -2.58 | -1.37 | 11.5  | 12.87 | 1.73E-11 | 5.25E-10 |
| ILMN_1675844 | WDR1     | NM_017491.3    | -2.73 | -1.45 | 11.07 | 12.53 | 1.94E-11 | 5.83E-10 |
| ILMN_1808226 | RGS16    | NM_002928.2    | -3.94 | -1.98 | 8.22  | 10.2  | 1.96E-11 | 5.9E-10  |
| ILMN_1807919 | TNS1     | NM_022648.3    | -2.79 | -1.48 | 8.02  | 9.5   | 2E-11    | 5.99E-10 |
| ILMN_1762899 | EGR1     | NM_001964.2    | -2.55 | -1.35 | 11.11 | 12.46 | 2.1E-11  | 6.28E-10 |
| ILMN_1809590 | PFS2     | NM_016095.1    | -2.58 | -1.37 | 11.96 | 13.33 | 2.15E-11 | 6.41E-10 |
| ILMN_2144088 | FDFT1    | NM_004462.3    | -2.14 | -1.1  | 14.04 | 15.14 | 2.16E-11 | 6.42E-10 |
| ILMN_1657898 | MTP18    | NM_016498.3    | -2.93 | -1.55 | 7.9   | 9.44  | 2.16E-11 | 6.42E-10 |
| ILMN_2396948 | PSMC3IP  | NM_016556.1    | -2.73 | -1.45 | 9.83  | 11.28 | 2.19E-11 | 6.48E-10 |
| ILMN_1794829 | C6ORF117 | NM_138409.1    | -2.57 | -1.36 | 8.79  | 10.15 | 2.19E-11 | 6.48E-10 |
| ILMN_1754272 | FLJ13912 | NM_022770.2    | -2.16 | -1.11 | 10.6  | 11.71 | 2.2E-11  | 6.5E-10  |
| ILMN_1699071 | C21ORF7  | NM_020152.2    | -4.06 | -2.02 | 8.2   | 10.22 | 2.22E-11 | 6.55E-10 |
| ILMN_1677814 | ABCC3    | NM_020037.1    | -4.79 | -2.26 | 8.95  | 11.21 | 2.22E-11 | 6.55E-10 |
| ILMN_2112128 | MAPK4    | NM_002747.3    | -2.57 | -1.36 | 9.9   | 11.26 | 2.26E-11 | 6.64E-10 |
| ILMN_1770084 | TACC1    | NM_006283.1    | -2.22 | -1.15 | 13.63 | 14.78 | 2.3E-11  | 6.76E-10 |
| ILMN_2362545 | ZWINT    | NM_001005413.1 | -2.75 | -1.46 | 8.04  | 9.5   | 2.33E-11 | 6.82E-10 |
| ILMN_1726410 | APRT     | NM_001030018.1 | -2.87 | -1.52 | 11.47 | 13    | 2.38E-11 | 6.94E-10 |
| ILMN_2227573 | GSTO1    | NM_004832.1    | -2.31 | -1.21 | 12.78 | 13.99 | 2.39E-11 | 6.95E-10 |
| ILMN_1708936 | EXOSC3   | NM_001002269.1 | -2.19 | -1.13 | 11.17 | 12.3  | 2.46E-11 | 7.15E-10 |

Supplementary Table 2

|              |          |                |       |       |       |       |          |          |
|--------------|----------|----------------|-------|-------|-------|-------|----------|----------|
| ILMN_1797776 | PRSS23   | NM_007173.3    | -2.77 | -1.47 | 11.47 | 12.94 | 2.47E-11 | 7.16E-10 |
| ILMN_1758728 | FANCG    | NM_004629.1    | -2.22 | -1.15 | 11.26 | 12.41 | 2.48E-11 | 7.17E-10 |
| ILMN_1806023 | JUN      | NM_002228.3    | -2.03 | -1.02 | 13.63 | 14.65 | 2.5E-11  | 7.21E-10 |
| ILMN_2268068 | MAPKAP1  | NM_001006618.1 | -2.43 | -1.28 | 8.69  | 9.97  | 2.53E-11 | 7.31E-10 |
| ILMN_1779517 | RASEF    | NM_152573.2    | -2.51 | -1.33 | 8.34  | 9.67  | 2.68E-11 | 7.69E-10 |
| ILMN_1718960 | SERPINB8 | NM_001031848.1 | -3.34 | -1.74 | 9.14  | 10.88 | 2.7E-11  | 7.73E-10 |
| ILMN_1677273 | TH       | NM_000360.2    | -2.77 | -1.47 | 8.18  | 9.65  | 2.73E-11 | 7.8E-10  |
| ILMN_1687107 | RFWD3    | NM_018124.3    | -2.22 | -1.15 | 10.9  | 12.05 | 2.77E-11 | 7.88E-10 |
| ILMN_2336595 | ACSS2    | NM_001076552.1 | -2.16 | -1.11 | 12.01 | 13.12 | 2.77E-11 | 7.88E-10 |
| ILMN_2355831 | FHL2     | NM_201555.1    | -2.35 | -1.23 | 12.26 | 13.49 | 2.78E-11 | 7.89E-10 |
| ILMN_1714197 | ACSS2    | NM_139274.1    | -2.13 | -1.09 | 12.28 | 13.37 | 2.79E-11 | 7.92E-10 |
| ILMN_2388155 | CASP3    | NM_032991.2    | -2.03 | -1.02 | 12.6  | 13.62 | 2.8E-11  | 7.92E-10 |
| ILMN_1714730 | UBE2C    | NM_181803.1    | -2.95 | -1.56 | 11.65 | 13.21 | 2.84E-11 | 8.02E-10 |
| ILMN_1806106 | GNL3     | NM_014366.4    | -2.33 | -1.22 | 11.08 | 12.3  | 2.89E-11 | 8.15E-10 |
| ILMN_1783285 | CTPS     | NM_001905.1    | -2.36 | -1.24 | 11.27 | 12.52 | 2.91E-11 | 8.18E-10 |
| ILMN_1685916 | KIF2C    | NM_006845.2    | -3.20 | -1.68 | 9.86  | 11.55 | 2.94E-11 | 8.27E-10 |
| ILMN_1788783 | TRAM2    | NM_012288.3    | -3.34 | -1.74 | 10.82 | 12.56 | 2.96E-11 | 8.31E-10 |
| ILMN_1687978 | PHLDA1   | NM_007350.2    | -2.53 | -1.34 | 13.45 | 14.79 | 2.97E-11 | 8.32E-10 |
| ILMN_1716057 | CAPN2    | NM_001748.3    | -2.13 | -1.09 | 9.18  | 10.27 | 2.98E-11 | 8.33E-10 |
| ILMN_2374425 | CCNE1    | NM_001238.1    | -2.31 | -1.21 | 9.97  | 11.18 | 3.02E-11 | 8.43E-10 |
| ILMN_1670353 | RAD51AP1 | NM_006479.2    | -2.75 | -1.46 | 10.26 | 11.73 | 3.03E-11 | 8.44E-10 |
| ILMN_1678961 | FRMD4A   | NM_018027.2    | -2.11 | -1.08 | 11.89 | 12.97 | 3.09E-11 | 8.59E-10 |
| ILMN_1717490 | RPL6     | NM_001024662.1 | -2.58 | -1.37 | 11.86 | 13.23 | 3.1E-11  | 8.61E-10 |
| ILMN_1702973 | FLJ13391 | NM_032181.1    | -4.26 | -2.09 | 7.72  | 9.81  | 3.12E-11 | 8.65E-10 |
| ILMN_1778488 | WDR41    | NM_018268.2    | -1.89 | -0.92 | 11.61 | 12.53 | 3.19E-11 | 8.85E-10 |
| ILMN_1739576 | CYB5R2   | NM_016229.2    | -5.50 | -2.46 | 8.21  | 10.68 | 3.2E-11  | 8.86E-10 |
| ILMN_1776490 | C17ORF53 | NM_024032.2    | -3.43 | -1.78 | 9.57  | 11.35 | 3.2E-11  | 8.86E-10 |
| ILMN_1713751 | ADAM19   | NM_033274.2    | -2.14 | -1.1  | 12.02 | 13.12 | 3.33E-11 | 9.19E-10 |
| ILMN_1753377 | RASGRF2  | NM_006909.1    | -2.95 | -1.56 | 8.44  | 10.01 | 3.34E-11 | 9.2E-10  |
| ILMN_2172174 | NP       | NM_000270.1    | -2.89 | -1.53 | 10.09 | 11.62 | 3.38E-11 | 9.28E-10 |
| ILMN_2162989 | KUA      | NM_199129.1    | -2.35 | -1.23 | 11.19 | 12.42 | 3.39E-11 | 9.31E-10 |
| ILMN_1753342 | SAT      | NM_002970.1    | -2.25 | -1.17 | 12.55 | 13.72 | 3.41E-11 | 9.34E-10 |
| ILMN_1721128 | TOMM34   | NM_006809.4    | -2.28 | -1.19 | 12.05 | 13.23 | 3.57E-11 | 9.73E-10 |
| ILMN_2368718 | CENPM    | NM_001002876.1 | -2.97 | -1.57 | 10.57 | 12.14 | 3.72E-11 | 1.01E-09 |
| ILMN_1656369 | C8ORF4   | NM_020130.2    | -2.22 | -1.15 | 8.81  | 9.96  | 3.83E-11 | 1.04E-09 |
| ILMN_1685625 | UCP2     | NM_003355.2    | -3.18 | -1.67 | 8.82  | 10.49 | 3.95E-11 | 1.07E-09 |
| ILMN_1683678 | DNAPT6   | NM_015535.1    | -2.39 | -1.26 | 12.75 | 14.01 | 3.99E-11 | 1.08E-09 |
| ILMN_1790100 | FLJ25416 | NM_145018.2    | -3.63 | -1.86 | 9.26  | 11.12 | 4.05E-11 | 1.09E-09 |
| ILMN_1800619 | BRI3BP   | NM_080626.5    | -2.91 | -1.54 | 8.81  | 10.36 | 4.21E-11 | 1.13E-09 |
| ILMN_1678143 | ARHGDI8  | NM_001175.4    | -4.32 | -2.11 | 7.75  | 9.86  | 4.26E-11 | 1.14E-09 |
| ILMN_2045729 | WDR12    | NM_018256.2    | -1.93 | -0.95 | 10.95 | 11.9  | 4.34E-11 | 1.16E-09 |
| ILMN_2412927 | GMPPB    | NM_021971.1    | -2.66 | -1.41 | 9.92  | 11.33 | 4.5E-11  | 1.2E-09  |
| ILMN_1668408 | PDCD8    | NM_004208.2    | -2.13 | -1.09 | 10.25 | 11.34 | 4.76E-11 | 1.26E-09 |

Supplementary Table 2

|              |           |                |       |       |       |       |          |          |
|--------------|-----------|----------------|-------|-------|-------|-------|----------|----------|
| ILMN_2368721 | CENPM     | NM_001002876.1 | -3.43 | -1.78 | 9.45  | 11.23 | 4.79E-11 | 1.26E-09 |
| ILMN_1738742 | PLAT      | NM_000930.2    | -2.79 | -1.48 | 10.34 | 11.82 | 4.87E-11 | 1.28E-09 |
| ILMN_2092756 | TMEM109   | NM_024092.1    | -2.11 | -1.08 | 10.79 | 11.88 | 4.95E-11 | 1.3E-09  |
| ILMN_1696713 | POLA2     | NM_002689.2    | -2.57 | -1.36 | 10.84 | 12.19 | 5.27E-11 | 1.37E-09 |
| ILMN_1723158 | NOL1      | NM_006170.2    | -2.13 | -1.09 | 11.67 | 12.76 | 5.3E-11  | 1.38E-09 |
| ILMN_1684368 | MST150    | NM_032947.3    | -2.75 | -1.46 | 8.78  | 10.24 | 5.31E-11 | 1.38E-09 |
| ILMN_2409220 | HMMR      | NM_012484.1    | -4.92 | -2.3  | 8.55  | 10.85 | 5.39E-11 | 1.4E-09  |
| ILMN_1690125 | PDLIM7    | NM_213636.1    | -2.10 | -1.07 | 13.16 | 14.23 | 5.46E-11 | 1.42E-09 |
| ILMN_1684321 | CYB5-M    | NM_030579.1    | -1.88 | -0.91 | 13.48 | 14.39 | 5.51E-11 | 1.43E-09 |
| ILMN_1720048 | CCL2      | NM_002982.3    | -2.46 | -1.3  | 12.56 | 13.86 | 5.56E-11 | 1.44E-09 |
| ILMN_1660654 | CDCA2     | NM_152562.2    | -3.25 | -1.7  | 9.21  | 10.92 | 5.68E-11 | 1.47E-09 |
| ILMN_1803882 | VEGF      | NM_001025366.1 | -2.66 | -1.41 | 8.08  | 9.5   | 5.79E-11 | 1.49E-09 |
| ILMN_1702237 | FKBP1A    | NM_054014.1    | -2.55 | -1.35 | 8.77  | 10.13 | 5.92E-11 | 1.52E-09 |
| ILMN_1815308 | SDC1      | NM_002997.4    | -3.41 | -1.77 | 9.08  | 10.85 | 5.95E-11 | 1.53E-09 |
| ILMN_1726266 | ADAM12    | NM_021641.2    | -2.77 | -1.47 | 7.93  | 9.41  | 5.97E-11 | 1.53E-09 |
| ILMN_1758626 | IDS       | NM_000202.2    | -2.45 | -1.29 | 12.11 | 13.4  | 6.03E-11 | 1.54E-09 |
| ILMN_1811433 | RPL8      | NM_033301.1    | -3.51 | -1.81 | 10.49 | 12.29 | 6.07E-11 | 1.55E-09 |
| ILMN_2081682 | SMAP1L    | NM_022733.1    | -2.03 | -1.02 | 12.92 | 13.94 | 6.19E-11 | 1.58E-09 |
| ILMN_1815169 | MCM5      | NM_006739.2    | -2.31 | -1.21 | 10.78 | 11.98 | 6.26E-11 | 1.59E-09 |
| ILMN_1731612 | UCHL5     | NM_015984.1    | -2.17 | -1.12 | 10.39 | 11.51 | 6.43E-11 | 1.63E-09 |
| ILMN_1760506 | LOC158160 | NM_182829.1    | -2.60 | -1.38 | 8.59  | 9.96  | 6.55E-11 | 1.66E-09 |
| ILMN_2339266 | LAMA2     | NM_000426.3    | -2.50 | -1.32 | 7.84  | 9.16  | 6.57E-11 | 1.66E-09 |
| ILMN_1697559 | G6PD      | NM_000402.2    | -2.55 | -1.35 | 10.81 | 12.16 | 6.59E-11 | 1.66E-09 |
| ILMN_1656628 | WDR4      | NM_033661.3    | -2.22 | -1.15 | 10.87 | 12.02 | 6.62E-11 | 1.67E-09 |
| ILMN_1725260 | CDC25C    | NM_001790.3    | -3.29 | -1.72 | 8.9   | 10.62 | 6.67E-11 | 1.68E-09 |
| ILMN_1673673 | PBK       | NM_018492.2    | -2.50 | -1.32 | 10.7  | 12.02 | 6.73E-11 | 1.69E-09 |
| ILMN_1751776 | FLJ40629  | NM_152515.2    | -2.62 | -1.39 | 10.44 | 11.83 | 6.93E-11 | 1.73E-09 |
| ILMN_1682792 | BYSL      | NM_004053.3    | -2.04 | -1.03 | 11.08 | 12.11 | 6.94E-11 | 1.73E-09 |
| ILMN_1674985 | TMEM51    | NM_018022.1    | -2.38 | -1.25 | 10.28 | 11.53 | 6.97E-11 | 1.74E-09 |
| ILMN_1707720 | SLC1A5    | NM_005628.1    | -3.16 | -1.66 | 7.87  | 9.53  | 6.99E-11 | 1.74E-09 |
| ILMN_2313821 | AIFM1     | NM_145813.1    | -1.96 | -0.97 | 11.43 | 12.41 | 7.09E-11 | 1.77E-09 |
| ILMN_1797822 | KIAA0746  | NM_015187.1    | -2.73 | -1.45 | 12.23 | 13.68 | 7.42E-11 | 1.84E-09 |
| ILMN_1784871 | FASN      | NM_004104.4    | -3.03 | -1.6  | 12.77 | 14.36 | 7.43E-11 | 1.84E-09 |
| ILMN_1727540 | C1ORF112  | NM_018186.2    | -2.23 | -1.16 | 9.88  | 11.04 | 7.51E-11 | 1.86E-09 |
| ILMN_1704702 | MCM7      | NM_005916.3    | -3.71 | -1.89 | 10.05 | 11.94 | 7.52E-11 | 1.86E-09 |
| ILMN_1661264 | SHMT2     | NM_005412.4    | -1.88 | -0.91 | 13.12 | 14.03 | 7.81E-11 | 1.92E-09 |
| ILMN_1782403 | PRR11     | NM_018304.1    | -2.64 | -1.4  | 9.6   | 11    | 7.81E-11 | 1.92E-09 |
| ILMN_1702447 | IGF2BP2   | NM_006548.4    | -2.22 | -1.15 | 12.06 | 13.2  | 7.88E-11 | 1.94E-09 |
| ILMN_1742166 | GRWD1     | NM_031485.2    | -2.07 | -1.05 | 11.13 | 12.18 | 8.05E-11 | 1.98E-09 |
| ILMN_2285996 | KIAA0101  | NM_014736.4    | -2.69 | -1.43 | 12.21 | 13.64 | 8.13E-11 | 1.99E-09 |
| ILMN_1795298 | GPR30     | NM_001031682.1 | -2.39 | -1.26 | 9.51  | 10.77 | 8.14E-11 | 1.99E-09 |
| ILMN_1814985 | PDLIM7    | NM_213636.1    | -2.45 | -1.29 | 10.98 | 12.27 | 8.16E-11 | 1.99E-09 |
| ILMN_1784553 | SDC2      | NM_002998.3    | -2.73 | -1.45 | 9.29  | 10.74 | 8.17E-11 | 1.99E-09 |

Supplementary Table 2

|              |           |                |       |       |       |       |          |          |
|--------------|-----------|----------------|-------|-------|-------|-------|----------|----------|
| ILMN_1770290 | CNN2      | NM_201277.1    | -2.07 | -1.05 | 11.73 | 12.77 | 8.25E-11 | 2.01E-09 |
| ILMN_1723260 | ETV5      | NM_004454.1    | -3.94 | -1.98 | 9.21  | 11.19 | 8.31E-11 | 2.02E-09 |
| ILMN_1801257 | CENPA     | NM_001809.2    | -3.68 | -1.88 | 9.76  | 11.64 | 8.46E-11 | 2.05E-09 |
| ILMN_1768020 | NY-SAR-48 | NM_001011699.1 | -2.83 | -1.5  | 9.54  | 11.05 | 8.56E-11 | 2.07E-09 |
| ILMN_1750711 | MYOHD1    | NM_001033580.1 | -3.14 | -1.65 | 8.54  | 10.19 | 8.71E-11 | 2.1E-09  |
| ILMN_2406106 | CACNB2    | NM_201572.1    | -2.38 | -1.25 | 10.11 | 11.37 | 8.83E-11 | 2.12E-09 |
| ILMN_1654072 | CX3CL1    | NM_002996.3    | -2.17 | -1.12 | 11.44 | 12.55 | 8.83E-11 | 2.12E-09 |
| ILMN_1709153 | LOC51334  | NM_016644.1    | -2.71 | -1.44 | 9     | 10.44 | 8.9E-11  | 2.13E-09 |
| ILMN_2318638 | TGIF1     | NM_170695.2    | -1.99 | -0.99 | 12.2  | 13.19 | 8.94E-11 | 2.14E-09 |
| ILMN_1757552 | PTRF      | NM_012232.2    | -2.08 | -1.06 | 12.94 | 14.01 | 9.01E-11 | 2.15E-09 |
| ILMN_2213136 | LEF1      | NM_016269.2    | -3.05 | -1.61 | 8.51  | 10.12 | 9.04E-11 | 2.15E-09 |
| ILMN_1696485 | HNRPAB    | NM_031266.2    | -2.13 | -1.09 | 11.98 | 13.07 | 9.46E-11 | 2.24E-09 |
| ILMN_1728048 | LOC158160 | NM_001031744.1 | -2.87 | -1.52 | 9.6   | 11.12 | 9.66E-11 | 2.29E-09 |
| ILMN_2330267 | ABCE1     | NM_001040876.1 | -2.31 | -1.21 | 11.07 | 12.28 | 9.74E-11 | 2.3E-09  |
| ILMN_1663976 | PDLIM4    | NM_003687.2    | -2.99 | -1.58 | 8.89  | 10.47 | 1.01E-10 | 2.37E-09 |
| ILMN_2085760 | ARPC1B    | NM_005720.2    | -2.77 | -1.47 | 9.42  | 10.89 | 1.01E-10 | 2.38E-09 |
| ILMN_1702501 | RPS6KA2   | NM_021135.4    | -2.13 | -1.09 | 12.23 | 13.32 | 1.05E-10 | 2.47E-09 |
| ILMN_1768662 | UCK2      | NM_012474.3    | -2.45 | -1.29 | 10.33 | 11.61 | 1.06E-10 | 2.48E-09 |
| ILMN_2404906 | SGOL1     | NM_001012413.1 | -3.20 | -1.68 | 8.79  | 10.47 | 1.08E-10 | 2.51E-09 |
| ILMN_1763386 | BID       | NM_001196.2    | -2.20 | -1.14 | 10.22 | 11.35 | 1.09E-10 | 2.54E-09 |
| ILMN_2120340 | RUVBL2    | NM_006666.1    | -1.93 | -0.95 | 11.68 | 12.63 | 1.11E-10 | 2.57E-09 |
| ILMN_1785336 | PMM2      | NM_000303.1    | -2.53 | -1.34 | 9.38  | 10.72 | 1.11E-10 | 2.58E-09 |
| ILMN_2410929 | PAPSS2    | NM_004670.3    | -2.58 | -1.37 | 7.68  | 9.05  | 1.12E-10 | 2.6E-09  |
| ILMN_1703572 | PCDH20    | NM_022843.2    | -6.32 | -2.66 | 8.53  | 11.19 | 1.15E-10 | 2.67E-09 |
| ILMN_1749432 | MRPL32    | NM_031903.1    | -1.88 | -0.91 | 11.35 | 12.26 | 1.18E-10 | 2.72E-09 |
| ILMN_1655642 | KIAA1794  | NM_018193.1    | -3.39 | -1.76 | 8.44  | 10.2  | 1.19E-10 | 2.76E-09 |
| ILMN_1677085 | RGS19     | NM_005873.1    | -2.58 | -1.37 | 9.63  | 10.99 | 1.2E-10  | 2.76E-09 |
| ILMN_2077550 | RACGAP1   | NM_013277.2    | -2.11 | -1.08 | 11.24 | 12.32 | 1.2E-10  | 2.76E-09 |
| ILMN_1683475 | TOMM40    | NM_006114.1    | -2.01 | -1.01 | 12.95 | 13.95 | 1.24E-10 | 2.85E-09 |
| ILMN_1659364 | RFC5      | NM_007370.3    | -1.77 | -0.82 | 11.35 | 12.18 | 1.33E-10 | 3.03E-09 |
| ILMN_1685661 | CGI-115   | NM_016052.2    | -1.83 | -0.87 | 10.76 | 11.63 | 1.34E-10 | 3.06E-09 |
| ILMN_1781207 | FYN       | NM_153047.1    | -2.22 | -1.15 | 9.63  | 10.78 | 1.37E-10 | 3.12E-09 |
| ILMN_2414848 | TBRG4     | NM_030900.2    | -1.91 | -0.93 | 10.55 | 11.48 | 1.37E-10 | 3.12E-09 |
| ILMN_1803312 | HSA9761   | NM_014473.2    | -2.20 | -1.14 | 11.18 | 12.32 | 1.38E-10 | 3.14E-09 |
| ILMN_1715748 | FLNC      | NM_001458.2    | -3.94 | -1.98 | 9.86  | 11.84 | 1.4E-10  | 3.18E-09 |
| ILMN_2372413 | BID       | NM_197967.1    | -2.39 | -1.26 | 9.92  | 11.18 | 1.43E-10 | 3.25E-09 |
| ILMN_1657547 | CCDC34    | NM_030771.1    | -2.62 | -1.39 | 12.24 | 13.63 | 1.44E-10 | 3.25E-09 |
| ILMN_1786310 | MVK       | NM_000431.1    | -2.77 | -1.47 | 9.53  | 11.01 | 1.44E-10 | 3.26E-09 |
| ILMN_1796949 | TPX2      | NM_012112.4    | -2.95 | -1.56 | 10.35 | 11.91 | 1.44E-10 | 3.26E-09 |
| ILMN_1669497 | OSBPL10   | NM_017784.3    | -3.27 | -1.71 | 9.25  | 10.96 | 1.49E-10 | 3.36E-09 |
| ILMN_1794885 | FRMD5     | NM_001031729.1 | -2.71 | -1.44 | 9.5   | 10.94 | 1.51E-10 | 3.4E-09  |
| ILMN_2222008 | KIFC1     | NM_002263.2    | -2.46 | -1.3  | 11.51 | 12.81 | 1.57E-10 | 3.51E-09 |
| ILMN_1685954 | HMBS      | NM_000190.3    | -2.53 | -1.34 | 10.76 | 12.1  | 1.57E-10 | 3.52E-09 |

Supplementary Table 2

|              |          |                |       |       |       |       |          |             |
|--------------|----------|----------------|-------|-------|-------|-------|----------|-------------|
| ILMN_1803686 | ADA      | NM_000022.2    | -2.28 | -1.19 | 10.05 | 11.24 | 1.58E-10 | 3.53E-09    |
| ILMN_1716397 | LAYN     | NM_178834.2    | -3.05 | -1.61 | 9.18  | 10.79 | 1.58E-10 | 3.54E-09    |
| ILMN_1777233 | E2F2     | NM_004091.2    | -2.35 | -1.23 | 10.86 | 12.09 | 1.61E-10 | 3.58E-09    |
| ILMN_1779374 | AMMECR1  | NM_001025580.1 | -3.23 | -1.69 | 9.18  | 10.87 | 1.62E-10 | 3.61E-09    |
| ILMN_1722834 | RGS12    | NM_002926.2    | -2.03 | -1.02 | 11.89 | 12.91 | 1.63E-10 | 3.63E-09    |
| ILMN_1678957 | WDR55    | NM_017706.3    | -2.27 | -1.18 | 9.36  | 10.55 | 1.64E-10 | 3.63E-09    |
| ILMN_1692280 | NKX2-2   | NM_002509.2    | -2.00 | -1    | 11.96 | 12.96 | 1.67E-10 | 3.69E-09    |
| ILMN_1680675 | MRRF     | NM_138777.2    | -2.04 | -1.03 | 11.02 | 12.06 | 1.77E-10 | 3.88E-09    |
| ILMN_2362974 | CASP7    | NM_033338.4    | -2.51 | -1.33 | 8.19  | 9.52  | 1.81E-10 | 3.96E-09    |
| ILMN_1697567 | TPM3     | NM_153649.2    | -2.04 | -1.03 | 11.83 | 12.86 | 1.82E-10 | 3.98E-09    |
| ILMN_1740155 | COL9A3   | NM_001853.2    | -3.39 | -1.76 | 8.72  | 10.47 | 1.84E-10 | 4.02E-09    |
| ILMN_1791222 | GLYCTK   | NM_145262.2    | -2.19 | -1.13 | 8.25  | 9.38  | 1.95E-10 | 4.25E-09    |
| ILMN_1804448 | MSI2     | NM_170721.1    | -1.84 | -0.88 | 10.69 | 11.57 | 1.98E-10 | 4.31E-09    |
| ILMN_1716400 | FOXM1    | NM_202002.1    | -2.77 | -1.47 | 8.83  | 10.3  | 2E-10    | 4.34E-09    |
| ILMN_1789123 | PLK4     | NM_014264.2    | -2.31 | -1.21 | 10.63 | 11.84 | 2.03E-10 | 4.41E-09    |
| ILMN_2134765 | C6ORF26  | NM_001039651.1 | -2.10 | -1.07 | 9.6   | 10.67 | 2.06E-10 | 4.46E-09    |
| ILMN_1721713 | EXOSC9   | NM_005033.1    | -1.75 | -0.81 | 11.18 | 11.99 | 2.08E-10 | 4.49E-09    |
| ILMN_1785795 | METAP1   | NM_015143.1    | -1.85 | -0.89 | 12.19 | 13.08 | 2.11E-10 | 4.54E-09    |
| ILMN_1674231 | CHAF1B   | NM_005441.2    | -3.07 | -1.62 | 9.57  | 11.2  | 2.16E-10 | 4.64E-09    |
| ILMN_1810181 | PCGF6    | NM_001011663.1 | -2.60 | -1.38 | 9.34  | 10.72 | 2.19E-10 | 4.71E-09    |
| ILMN_1686884 | IL1RAP   | NM_002182.2    | -2.55 | -1.35 | 7.99  | 9.34  | 2.23E-10 | 4.79E-09    |
| ILMN_1732831 | CHST7    | NM_019886.2    | -1.96 | -0.97 | 12.63 | 13.6  | 2.25E-10 | 4.81E-09    |
| ILMN_2200917 | SLC4A7   | NM_003615.2    | -2.27 | -1.18 | 11.08 | 12.27 | 2.26E-10 | 4.83E-09    |
| ILMN_1776428 | STK17A   | NM_004760.1    | -2.60 | -1.38 | 8.77  | 10.15 | 2.26E-10 | 4.83E-09    |
| ILMN_1803005 | MMACHC   | NM_015506.1    | -2.30 | -1.2  | 9.37  | 10.57 | 2.28E-10 | 4.86E-09    |
| ILMN_1752249 | FAM38A   | NM_014745.1    | -2.28 | -1.19 | 10.43 | 11.62 | 2.35E-10 | 0.000000005 |
| ILMN_2173451 | GPI      | NM_000175.2    | -2.00 | -1    | 11.57 | 12.57 | 2.36E-10 | 5.03E-09    |
| ILMN_2096719 | GRK5     | NM_005308.2    | -2.36 | -1.24 | 10.85 | 12.09 | 2.37E-10 | 5.04E-09    |
| ILMN_1737205 | MCM4     | NM_005914.2    | -2.38 | -1.25 | 12.48 | 13.73 | 2.4E-10  | 5.1E-09     |
| ILMN_1803124 | BIRC5    | NM_001012271.1 | -2.99 | -1.58 | 8.61  | 10.19 | 2.41E-10 | 5.11E-09    |
| ILMN_1811188 | BCCIP    | NM_078468.1    | -1.96 | -0.97 | 11.36 | 12.33 | 2.43E-10 | 5.15E-09    |
| ILMN_1704305 | NIP7     | NM_016101.3    | -2.11 | -1.08 | 10.73 | 11.82 | 2.46E-10 | 5.2E-09     |
| ILMN_2094061 | IMPA2    | NM_014214.1    | -2.62 | -1.39 | 9.13  | 10.52 | 2.47E-10 | 5.21E-09    |
| ILMN_2071682 | FLJ45557 | NM_001039762.1 | -4.69 | -2.23 | 9.96  | 12.19 | 2.48E-10 | 5.22E-09    |
| ILMN_2215545 | C3ORF26  | NM_032359.2    | -1.80 | -0.85 | 11.88 | 12.73 | 2.5E-10  | 5.26E-09    |
| ILMN_2303912 | SCD5     | NM_001037582.1 | -3.39 | -1.76 | 9.81  | 11.58 | 2.51E-10 | 5.27E-09    |
| ILMN_1738147 | NES      | NM_006617.1    | -1.99 | -0.99 | 13.73 | 14.72 | 2.53E-10 | 5.31E-09    |
| ILMN_2372040 | MTP18    | NM_001003704.1 | -3.32 | -1.73 | 8.32  | 10.05 | 2.55E-10 | 5.35E-09    |
| ILMN_1740407 | CSS3     | NM_175856.4    | -2.00 | -1    | 10.31 | 11.31 | 2.57E-10 | 5.4E-09     |
| ILMN_1706783 | TAGLN    | NM_001001522.1 | -3.48 | -1.8  | 7.36  | 9.17  | 2.59E-10 | 5.42E-09    |
| ILMN_1741346 | EPHB3    | NM_004443.3    | -2.62 | -1.39 | 8.76  | 10.15 | 2.59E-10 | 5.42E-09    |
| ILMN_2294431 | CDC25C   | NM_001790.3    | -3.27 | -1.71 | 8.74  | 10.46 | 2.61E-10 | 5.45E-09    |
| ILMN_1737252 | NRG1     | NM_013961.1    | -4.00 | -2    | 8.56  | 10.56 | 2.61E-10 | 5.45E-09    |

Supplementary Table 2

|              |           |                |       |       |       |       |          |          |
|--------------|-----------|----------------|-------|-------|-------|-------|----------|----------|
| ILMN_1772719 | XAB1      | NM_007266.1    | -2.22 | -1.15 | 13.11 | 14.27 | 2.64E-10 | 5.5E-09  |
| ILMN_1731639 | CASP3     | NM_004346.3    | -2.87 | -1.52 | 8.47  | 9.98  | 2.71E-10 | 5.65E-09 |
| ILMN_1686961 | C10ORF13  | NM_152429.2    | -2.38 | -1.25 | 9.03  | 10.27 | 2.75E-10 | 5.71E-09 |
| ILMN_1728984 | PA2G4     | NM_006191.1    | -2.03 | -1.02 | 11.94 | 12.96 | 2.75E-10 | 5.71E-09 |
| ILMN_1703178 | SCG2      | NM_003469.3    | -2.00 | -1    | 13.53 | 14.52 | 2.8E-10  | 5.8E-09  |
| ILMN_1665832 | ID1       | NM_181353.1    | -2.87 | -1.52 | 7.22  | 8.74  | 2.87E-10 | 5.94E-09 |
| ILMN_2089329 | SPRY2     | NM_005842.2    | -2.77 | -1.47 | 11.87 | 13.34 | 2.9E-10  | 5.98E-09 |
| ILMN_1734826 | NUP88     | NM_002532.3    | -1.80 | -0.85 | 12.2  | 13.05 | 2.9E-10  | 5.98E-09 |
| ILMN_1685703 | ACOX2     | NM_003500.2    | -1.96 | -0.97 | 11.72 | 12.7  | 2.9E-10  | 5.98E-09 |
| ILMN_2075189 | SLC35F2   | NM_017515.3    | -2.81 | -1.49 | 10.39 | 11.88 | 2.92E-10 | 6.02E-09 |
| ILMN_1803676 | ENOSF1    | NM_017512.2    | -2.38 | -1.25 | 10    | 11.25 | 2.94E-10 | 6.04E-09 |
| ILMN_1665559 | CDK2      | NM_001798.2    | -1.96 | -0.97 | 12.21 | 13.18 | 2.96E-10 | 6.09E-09 |
| ILMN_2181432 | SPC24     | NM_182513.1    | -2.41 | -1.27 | 10.56 | 11.83 | 2.99E-10 | 6.13E-09 |
| ILMN_1663399 | TIMP4     | NM_003256.2    | -2.62 | -1.39 | 9.86  | 11.25 | 2.99E-10 | 6.13E-09 |
| ILMN_1785324 | MTHFD1    | NM_005956.2    | -2.10 | -1.07 | 10.16 | 11.23 | 3.02E-10 | 6.19E-09 |
| ILMN_1795026 | C1ORF2    | NM_006589.2    | -2.22 | -1.15 | 11.82 | 12.97 | 3.08E-10 | 6.31E-09 |
| ILMN_1699603 | MRPL12    | NM_002949.2    | -2.35 | -1.23 | 11.27 | 12.51 | 3.09E-10 | 6.33E-09 |
| ILMN_1652237 | CBR3      | NM_001236.3    | -2.30 | -1.2  | 9.98  | 11.18 | 3.12E-10 | 6.39E-09 |
| ILMN_1739496 | PRRX1     | NM_022716.2    | -2.13 | -1.09 | 11.63 | 12.71 | 3.19E-10 | 6.5E-09  |
| ILMN_1790534 | LOC651423 | XM_940575.1    | -2.60 | -1.38 | 9.95  | 11.33 | 3.25E-10 | 6.61E-09 |
| ILMN_1742031 | IFRD2     | NM_006764.3    | -2.68 | -1.42 | 9.33  | 10.75 | 3.27E-10 | 6.65E-09 |
| ILMN_1658027 | RAD54L    | NM_003579.2    | -2.39 | -1.26 | 9.12  | 10.38 | 3.32E-10 | 6.74E-09 |
| ILMN_1666305 | CDKN3     | NM_005192.2    | -2.73 | -1.45 | 10.37 | 11.82 | 3.37E-10 | 6.82E-09 |
| ILMN_2066756 | NCAPG2    | NM_017760.5    | -2.64 | -1.4  | 10.45 | 11.85 | 3.56E-10 | 7.18E-09 |
| ILMN_2338268 | ABHD11    | NM_148916.2    | -2.17 | -1.12 | 9.19  | 10.31 | 3.56E-10 | 7.18E-09 |
| ILMN_2383611 | PTPRE     | NM_130435.2    | -1.99 | -0.99 | 11.09 | 12.08 | 3.6E-10  | 7.25E-09 |
| ILMN_1666306 | LOC402055 | NM_001013694.1 | -2.00 | -1    | 9.8   | 10.8  | 3.64E-10 | 7.32E-09 |
| ILMN_1741954 | SMYD3     | NM_022743.1    | -1.83 | -0.87 | 11.31 | 12.18 | 3.74E-10 | 7.51E-09 |
| ILMN_2087303 | XKR8      | NM_018053.2    | -2.22 | -1.15 | 9.15  | 10.3  | 3.77E-10 | 7.57E-09 |
| ILMN_1803348 | EHBP1     | NM_015252.2    | -1.87 | -0.9  | 12.56 | 13.46 | 3.81E-10 | 7.63E-09 |
| ILMN_2320250 | NOL6      | NM_139235.3    | -1.99 | -0.99 | 11.38 | 12.38 | 3.85E-10 | 7.7E-09  |
| ILMN_1771688 | RAB7B     | NM_177403.3    | -2.38 | -1.25 | 9.87  | 11.12 | 3.88E-10 | 7.76E-09 |
| ILMN_1684346 | TNFAIP8L1 | NM_152362.1    | -3.12 | -1.64 | 8.68  | 10.32 | 3.89E-10 | 7.76E-09 |
| ILMN_1691071 | FCRLM1    | NM_032738.3    | -2.45 | -1.29 | 7.59  | 8.89  | 3.95E-10 | 7.88E-09 |
| ILMN_2183409 | SCARB1    | NM_005505.3    | -1.91 | -0.93 | 11.15 | 12.08 | 3.95E-10 | 7.88E-09 |
| ILMN_1797728 | HMGCS1    | NM_002130.4    | -2.07 | -1.05 | 13.91 | 14.97 | 4E-10    | 7.97E-09 |
| ILMN_1779353 | PUS7      | NM_019042.3    | -3.12 | -1.64 | 9.48  | 11.12 | 4.05E-10 | 8.06E-09 |
| ILMN_1670218 | EXOSC6    | NM_058219.2    | -1.83 | -0.87 | 11.26 | 12.13 | 4.14E-10 | 8.24E-09 |
| ILMN_1748427 | ZNF239    | NM_005674.1    | -2.01 | -1.01 | 10.11 | 11.11 | 4.2E-10  | 8.33E-09 |
| ILMN_1688178 | CGI-96    | NM_015703.3    | -2.06 | -1.04 | 10.92 | 11.96 | 4.21E-10 | 8.33E-09 |
| ILMN_2334204 | FLJ20105  | NM_017669.2    | -3.27 | -1.71 | 7.76  | 9.47  | 4.22E-10 | 8.34E-09 |
| ILMN_1691476 | MYLK      | NM_005965.3    | -3.39 | -1.76 | 8.53  | 10.29 | 4.22E-10 | 8.34E-09 |
| ILMN_1728572 | DOK5      | NM_018431.3    | -2.03 | -1.02 | 10.55 | 11.57 | 4.25E-10 | 8.4E-09  |

Supplementary Table 2

|              |          |                |       |       |       |       |          |          |
|--------------|----------|----------------|-------|-------|-------|-------|----------|----------|
| ILMN_1658143 | RFC3     | NM_181558.1    | -2.97 | -1.57 | 10.23 | 11.8  | 4.26E-10 | 8.42E-09 |
| ILMN_1799103 | SNRPB    | NM_003091.3    | -1.77 | -0.82 | 13.21 | 14.03 | 4.34E-10 | 8.55E-09 |
| ILMN_1808789 | MYO5C    | NM_018728.1    | -2.57 | -1.36 | 9.43  | 10.79 | 4.47E-10 | 8.78E-09 |
| ILMN_2098446 | PMAIP1   | NM_021127.1    | -3.58 | -1.84 | 8.29  | 10.13 | 4.48E-10 | 8.78E-09 |
| ILMN_1735877 | EFEMP1   | NM_004105.2    | -1.99 | -0.99 | 11.62 | 12.62 | 4.48E-10 | 8.78E-09 |
| ILMN_2357809 | G3BP1    | NM_198395.1    | -1.91 | -0.93 | 10.76 | 11.69 | 4.49E-10 | 8.78E-09 |
| ILMN_1761463 | EFHD2    | NM_024329.4    | -2.13 | -1.09 | 11.74 | 12.83 | 4.56E-10 | 8.92E-09 |
| ILMN_2362457 | ZDHHC16  | NM_032327.2    | -1.95 | -0.96 | 11.24 | 12.2  | 4.57E-10 | 8.92E-09 |
| ILMN_1735093 | TIMELESS | NM_003920.2    | -2.00 | -1    | 11.24 | 12.24 | 4.63E-10 | 9.02E-09 |
| ILMN_2404256 | PTPRT    | NM_007050.4    | -3.86 | -1.95 | 7.57  | 9.52  | 4.64E-10 | 9.03E-09 |
| ILMN_1751028 | SERPINH1 | NM_001235.2    | -1.95 | -0.96 | 12.54 | 13.5  | 4.73E-10 | 9.18E-09 |
| ILMN_1678692 | M-RIP    | NM_201274.2    | -3.29 | -1.72 | 9.7   | 11.42 | 4.77E-10 | 9.25E-09 |
| ILMN_1698225 | MYO5A    | NM_000259.1    | -2.03 | -1.02 | 9.86  | 10.88 | 4.78E-10 | 9.25E-09 |
| ILMN_2196984 | OIP5     | NM_007280.1    | -2.57 | -1.36 | 10.72 | 12.08 | 4.81E-10 | 9.29E-09 |
| ILMN_2172890 | SLC18A1  | NM_003053.1    | -2.14 | -1.1  | 9.26  | 10.35 | 4.84E-10 | 9.34E-09 |
| ILMN_1726659 | THOP1    | NM_003249.3    | -1.84 | -0.88 | 11.13 | 12    | 4.86E-10 | 9.36E-09 |
| ILMN_1798654 | MCM6     | NM_005915.4    | -2.01 | -1.01 | 12.73 | 13.75 | 4.89E-10 | 9.42E-09 |
| ILMN_1799516 | DNAJC9   | NM_015190.3    | -1.75 | -0.81 | 12.95 | 13.77 | 5.04E-10 | 9.69E-09 |
| ILMN_1734445 | LOC91461 | NM_138370.1    | -2.41 | -1.27 | 7.94  | 9.2   | 5.14E-10 | 9.85E-09 |
| ILMN_1794165 | PGD      | NM_002631.2    | -1.78 | -0.83 | 13.85 | 14.69 | 5.2E-10  | 9.97E-09 |
| ILMN_1661755 | C9ORF88  | NM_022833.2    | -2.17 | -1.12 | 12.88 | 14    | 5.36E-10 | 1.02E-08 |
| ILMN_2169966 | TM4SF18  | NM_138786.1    | -2.77 | -1.47 | 7.43  | 8.9   | 5.55E-10 | 1.05E-08 |
| ILMN_1800697 | LDB2     | NM_001290.2    | -1.87 | -0.9  | 11.94 | 12.85 | 5.59E-10 | 1.06E-08 |
| ILMN_1673676 | SNX5     | NM_152227.1    | -2.66 | -1.41 | 10.88 | 12.29 | 5.68E-10 | 1.07E-08 |
| ILMN_1695404 | LY6E     | NM_002346.1    | -2.41 | -1.27 | 10.23 | 11.5  | 5.71E-10 | 1.08E-08 |
| ILMN_1723625 | MAP4K2   | NM_004579.2    | -2.07 | -1.05 | 11.26 | 12.31 | 5.72E-10 | 1.08E-08 |
| ILMN_2394242 | AMMECR1  | NM_001025580.1 | -2.81 | -1.49 | 8.83  | 10.32 | 5.73E-10 | 1.08E-08 |
| ILMN_1714335 | RDH10    | NM_172037.2    | -2.17 | -1.12 | 10.72 | 11.84 | 5.81E-10 | 1.09E-08 |
| ILMN_1703123 | AXUD1    | NM_033027.2    | -2.03 | -1.02 | 11.76 | 12.79 | 5.95E-10 | 1.12E-08 |
| ILMN_1778321 | SLC2A6   | NM_017585.2    | -2.64 | -1.4  | 10.81 | 12.22 | 5.98E-10 | 1.12E-08 |
| ILMN_1720526 | C16ORF60 | NM_018455.3    | -2.30 | -1.2  | 11.01 | 12.21 | 6.1E-10  | 1.14E-08 |
| ILMN_1772645 | MULK     | NM_018238.2    | -1.71 | -0.77 | 11.4  | 12.17 | 6.11E-10 | 1.14E-08 |
| ILMN_2373763 | CASP7    | NM_033339.3    | -2.33 | -1.22 | 9.7   | 10.92 | 6.18E-10 | 1.15E-08 |
| ILMN_1652505 | APEX2    | NM_014481.2    | -1.79 | -0.84 | 11.01 | 11.85 | 6.19E-10 | 1.15E-08 |
| ILMN_1673252 | JTV1     | NM_006303.2    | -1.84 | -0.88 | 12.5  | 13.38 | 6.22E-10 | 1.16E-08 |
| ILMN_2407619 | CDC25C   | NM_001790.3    | -3.18 | -1.67 | 8.75  | 10.42 | 6.25E-10 | 1.16E-08 |
| ILMN_1704055 | HSPC111  | NM_016391.2    | -2.55 | -1.35 | 9.74  | 11.09 | 6.33E-10 | 1.18E-08 |
| ILMN_1742577 | GTPBP4   | NM_012341.2    | -1.91 | -0.93 | 12.51 | 13.44 | 6.34E-10 | 1.18E-08 |
| ILMN_2339835 | PTGS1    | NM_080591.1    | -3.53 | -1.82 | 8.24  | 10.06 | 6.36E-10 | 1.18E-08 |
| ILMN_2070013 | SLC25A15 | NM_014252.2    | -2.19 | -1.13 | 8.7   | 9.84  | 6.36E-10 | 1.18E-08 |
| ILMN_2367239 | DSCR1    | NM_203417.1    | -1.91 | -0.93 | 13.66 | 14.59 | 6.38E-10 | 1.18E-08 |
| ILMN_1684217 | AURKB    | NM_004217.1    | -3.61 | -1.85 | 10.35 | 12.2  | 6.59E-10 | 1.21E-08 |
| ILMN_2382505 | SLC22A18 | NM_002555.3    | -1.80 | -0.85 | 9.19  | 10.04 | 6.68E-10 | 1.23E-08 |



Supplementary Table 2

|              |           |                |       |       |       |       |          |             |
|--------------|-----------|----------------|-------|-------|-------|-------|----------|-------------|
| ILMN_2375418 | DPH2      | NM_001384.4    | -1.79 | -0.84 | 11.26 | 12.09 | 6.77E-10 | 1.24E-08    |
| ILMN_1727194 | CALU      | NM_001219.2    | -1.78 | -0.83 | 12.77 | 13.61 | 6.78E-10 | 1.24E-08    |
| ILMN_1753249 | DDX10     | NM_004398.2    | -1.71 | -0.77 | 11.37 | 12.14 | 6.81E-10 | 1.25E-08    |
| ILMN_1651254 | LPP       | NM_005578.2    | -1.99 | -0.99 | 11.41 | 12.4  | 7.07E-10 | 1.29E-08    |
| ILMN_1794468 | QPCTL     | NM_017659.1    | -2.10 | -1.07 | 7.86  | 8.93  | 7.32E-10 | 1.33E-08    |
| ILMN_1715616 | PPIL5     | NM_152329.3    | -1.99 | -0.99 | 11.34 | 12.32 | 7.43E-10 | 1.35E-08    |
| ILMN_2112417 | PGAM1     | NM_002629.2    | -1.83 | -0.87 | 13.76 | 14.63 | 7.59E-10 | 1.37E-08    |
| ILMN_1808238 | RBPMS2    | NM_194272.1    | -2.83 | -1.5  | 10.75 | 12.25 | 7.62E-10 | 1.38E-08    |
| ILMN_1707807 | RNF128    | NM_194463.1    | -2.31 | -1.21 | 8.9   | 10.12 | 7.69E-10 | 1.39E-08    |
| ILMN_1733157 | THSD1     | NM_018676.2    | -2.93 | -1.55 | 9.33  | 10.88 | 7.75E-10 | 0.000000014 |
| ILMN_1815190 | METTL1    | NM_005371.3    | -2.31 | -1.21 | 9.9   | 11.11 | 7.76E-10 | 0.000000014 |
| ILMN_1726743 | MRPS30    | NM_016640.3    | -2.10 | -1.07 | 11.82 | 12.9  | 7.99E-10 | 1.44E-08    |
| ILMN_1763540 | PSME4     | NM_014614.1    | -3.10 | -1.63 | 10.26 | 11.89 | 7.99E-10 | 1.44E-08    |
| ILMN_2140974 | TPM4      | NM_003290.1    | -1.88 | -0.91 | 11    | 11.92 | 8E-10    | 1.44E-08    |
| ILMN_2399893 | RPS24     | NM_001026.3    | -2.16 | -1.11 | 12.47 | 13.57 | 8.25E-10 | 1.48E-08    |
| ILMN_1763638 | BCAR3     | NM_003567.2    | -1.91 | -0.93 | 11.42 | 12.35 | 8.29E-10 | 1.48E-08    |
| ILMN_1707484 | GEMIN6    | NM_024775.9    | -2.48 | -1.31 | 10.39 | 11.69 | 8.49E-10 | 1.52E-08    |
| ILMN_1685413 | ALG8      | NM_001007027.1 | -1.72 | -0.78 | 11.47 | 12.25 | 8.57E-10 | 1.53E-08    |
| ILMN_2224143 | MCM3      | NM_002388.3    | -1.93 | -0.95 | 13.44 | 14.39 | 8.6E-10  | 1.53E-08    |
| ILMN_2140990 | CAMK1     | NM_003656.3    | -1.96 | -0.97 | 10.8  | 11.77 | 8.75E-10 | 1.56E-08    |
| ILMN_1807501 | SLD5      | NM_032336.1    | -2.60 | -1.38 | 9.48  | 10.86 | 8.89E-10 | 1.58E-08    |
| ILMN_1788166 | TTK       | NM_003318.3    | -3.18 | -1.67 | 9.71  | 11.38 | 9.1E-10  | 1.62E-08    |
| ILMN_2368971 | PSMD12    | NM_002816.3    | -1.97 | -0.98 | 11.24 | 12.22 | 9.2E-10  | 1.63E-08    |
| ILMN_2394250 | PLEKHA1   | NM_021622.3    | -2.50 | -1.32 | 11.18 | 12.5  | 9.24E-10 | 1.64E-08    |
| ILMN_1669502 | E2F3      | NM_001949.2    | -1.74 | -0.8  | 11.64 | 12.43 | 9.38E-10 | 1.66E-08    |
| ILMN_1773395 | RDH5      | NM_002905.2    | -2.25 | -1.17 | 10.25 | 11.42 | 9.43E-10 | 1.67E-08    |
| ILMN_1781479 | SUV39H1   | NM_003173.1    | -1.96 | -0.97 | 11.1  | 12.07 | 9.97E-10 | 1.76E-08    |
| ILMN_1680367 | C10ORF90  | NM_001004298.2 | -2.57 | -1.36 | 8.02  | 9.38  | 1.02E-09 | 1.79E-08    |
| ILMN_2381138 | SEH1L     | NM_001013437.1 | -1.88 | -0.91 | 10.19 | 11.1  | 1.02E-09 | 0.000000018 |
| ILMN_1810423 | RPP40     | NM_006638.2    | -1.99 | -0.99 | 10.99 | 11.99 | 1.04E-09 | 1.83E-08    |
| ILMN_1689378 | CCRN4L    | NM_012118.2    | -2.19 | -1.13 | 9     | 10.13 | 1.04E-09 | 1.83E-08    |
| ILMN_1664231 | TIMM23    | XM_943316.1    | -1.66 | -0.73 | 12.59 | 13.32 | 1.05E-09 | 1.84E-08    |
| ILMN_1656452 | FLJ13909  | NM_025108.1    | -2.46 | -1.3  | 9.64  | 10.94 | 1.05E-09 | 1.84E-08    |
| ILMN_1763129 | XTP3TPA   | NM_024096.1    | -1.84 | -0.88 | 12.36 | 13.24 | 1.06E-09 | 1.84E-08    |
| ILMN_2383484 | C19ORF48  | NM_199250.1    | -2.01 | -1.01 | 10.58 | 11.59 | 1.06E-09 | 1.85E-08    |
| ILMN_1712803 | CCNB1     | NM_031966.2    | -3.16 | -1.66 | 9.23  | 10.9  | 1.06E-09 | 1.85E-08    |
| ILMN_1672121 | LOC387856 | XM_937099.1    | -1.77 | -0.82 | 10.7  | 11.53 | 1.06E-09 | 1.85E-08    |
| ILMN_1737195 | FKSG14    | NM_022145.2    | -3.14 | -1.65 | 9.31  | 10.96 | 1.07E-09 | 1.86E-08    |
| ILMN_1678353 | FARP1     | NM_005766.2    | -2.08 | -1.06 | 12.76 | 13.82 | 1.07E-09 | 1.86E-08    |
| ILMN_1756612 | STK32A    | NM_145001.1    | -2.46 | -1.3  | 8.4   | 9.71  | 1.09E-09 | 1.89E-08    |
| ILMN_1685834 | AMPH      | NM_001635.2    | -1.84 | -0.88 | 11.81 | 12.68 | 1.11E-09 | 1.92E-08    |
| ILMN_2181191 | TPI1      | NM_000365.4    | -1.65 | -0.72 | 14.56 | 15.27 | 1.13E-09 | 1.94E-08    |
| ILMN_1813846 | P2RX4     | NM_175568.1    | -1.87 | -0.9  | 9.32  | 10.22 | 1.15E-09 | 1.99E-08    |

Supplementary Table 2

|              |          |                |       |       |       |       |          |             |
|--------------|----------|----------------|-------|-------|-------|-------|----------|-------------|
| ILMN_1697363 | C20ORF27 | NM_017874.2    | -1.85 | -0.89 | 10.8  | 11.69 | 1.15E-09 | 1.99E-08    |
| ILMN_2210129 | PRIM1    | NM_000946.2    | -1.99 | -0.99 | 11    | 11.98 | 1.16E-09 | 1.99E-08    |
| ILMN_2056479 | TXNL2    | NM_006541.2    | -1.77 | -0.82 | 12.42 | 13.24 | 1.17E-09 | 0.00000002  |
| ILMN_2376723 | CDKN2B   | NM_078487.2    | -2.46 | -1.3  | 10.41 | 11.7  | 1.18E-09 | 2.03E-08    |
| ILMN_1656540 | RUVBL1   | NM_003707.1    | -1.95 | -0.96 | 11.4  | 12.36 | 1.21E-09 | 2.07E-08    |
| ILMN_1815039 | C6ORF153 | NM_033112.2    | -1.91 | -0.93 | 12.41 | 13.34 | 1.22E-09 | 2.08E-08    |
| ILMN_1685928 | WDR34    | NM_052844.3    | -2.01 | -1.01 | 10.75 | 11.76 | 1.23E-09 | 2.11E-08    |
| ILMN_1714364 | PTK2     | NM_153831.2    | -1.87 | -0.9  | 13.63 | 14.53 | 1.24E-09 | 2.11E-08    |
| ILMN_1810486 | RAB34    | NM_031934.3    | -2.08 | -1.06 | 11.54 | 12.6  | 1.24E-09 | 2.12E-08    |
| ILMN_1703370 | ZDHHC12  | NM_032799.4    | -1.97 | -0.98 | 10    | 10.98 | 1.25E-09 | 2.14E-08    |
| ILMN_2353143 | FBLIM1   | NM_001024215.1 | -2.33 | -1.22 | 7.89  | 9.1   | 1.27E-09 | 2.16E-08    |
| ILMN_1796335 | AYTL1    | NM_017839.3    | -2.23 | -1.16 | 8.3   | 9.46  | 1.28E-09 | 2.17E-08    |
| ILMN_2235283 | MAPK1    | NM_138957.2    | -2.46 | -1.3  | 9.39  | 10.69 | 1.32E-09 | 2.23E-08    |
| ILMN_1711005 | CDC25A   | NM_001789.2    | -2.31 | -1.21 | 9.96  | 11.18 | 1.32E-09 | 2.23E-08    |
| ILMN_1651902 | RASL11A  | NM_206827.1    | -1.84 | -0.88 | 7.84  | 8.72  | 1.33E-09 | 2.25E-08    |
| ILMN_2156982 | IMP4     | NM_033416.1    | -2.04 | -1.03 | 12.24 | 13.28 | 1.34E-09 | 2.27E-08    |
| ILMN_1805828 | VRK1     | NM_003384.2    | -2.77 | -1.47 | 9.83  | 11.29 | 1.34E-09 | 2.27E-08    |
| ILMN_1780298 | FAM86A   | NM_201400.1    | -3.51 | -1.81 | 8.69  | 10.5  | 1.35E-09 | 2.28E-08    |
| ILMN_1676504 | RPRML    | NM_203400.1    | -2.31 | -1.21 | 8.64  | 9.86  | 1.35E-09 | 2.28E-08    |
| ILMN_1805658 | LTV1     | NM_032860.3    | -1.78 | -0.83 | 11.09 | 11.93 | 1.35E-09 | 2.28E-08    |
| ILMN_1726114 | SLC45A3  | NM_033102.1    | -2.75 | -1.46 | 8.65  | 10.11 | 1.36E-09 | 0.000000023 |
| ILMN_1747303 | DDX39    | NM_005804.2    | -1.87 | -0.9  | 12.68 | 13.58 | 1.39E-09 | 2.33E-08    |
| ILMN_1719577 | C10ORF67 | NM_153714.1    | -2.38 | -1.25 | 7.91  | 9.16  | 1.39E-09 | 2.33E-08    |
| ILMN_2180371 | C12ORF24 | NM_013300.1    | -2.30 | -1.2  | 10.89 | 12.09 | 1.4E-09  | 2.34E-08    |
| ILMN_2048607 | ANKRD9   | NM_152326.2    | -2.07 | -1.05 | 11.71 | 12.77 | 1.41E-09 | 2.36E-08    |
| ILMN_1672660 | MBP      | NM_001025100.1 | -2.19 | -1.13 | 8.24  | 9.37  | 1.41E-09 | 2.36E-08    |
| ILMN_1713952 | C1ORF106 | NM_018265.1    | -2.10 | -1.07 | 10.2  | 11.27 | 1.41E-09 | 2.36E-08    |
| ILMN_1802151 | OSBPL5   | NM_020896.2    | -1.75 | -0.81 | 10.5  | 11.31 | 1.43E-09 | 2.38E-08    |
| ILMN_1784532 | COL22A1  | NM_152888.1    | -2.45 | -1.29 | 11.57 | 12.85 | 1.43E-09 | 2.38E-08    |
| ILMN_1789186 | OBFC1    | NM_024928.3    | -1.83 | -0.87 | 10.49 | 11.36 | 1.43E-09 | 2.39E-08    |
| ILMN_2184640 | NOLC1    | NM_004741.1    | -1.79 | -0.84 | 10.59 | 11.42 | 1.44E-09 | 2.39E-08    |
| ILMN_2344971 | FOXM1    | NM_021953.2    | -3.63 | -1.86 | 9.21  | 11.08 | 1.44E-09 | 2.39E-08    |
| ILMN_2414399 | NME1     | NM_000269.2    | -2.39 | -1.26 | 9.77  | 11.03 | 1.44E-09 | 0.000000024 |
| ILMN_2380850 | SDCCAG3  | NM_001039708.1 | -1.82 | -0.86 | 10.59 | 11.45 | 1.45E-09 | 0.000000024 |
| ILMN_2335718 | HNRPAB   | NM_004499.3    | -1.73 | -0.79 | 13.31 | 14.1  | 1.45E-09 | 2.41E-08    |
| ILMN_2329569 | C9ORF116 | NM_144654.1    | -2.17 | -1.12 | 10.51 | 11.63 | 1.45E-09 | 2.41E-08    |
| ILMN_2323087 | RBPMS    | NM_001008712.1 | -1.97 | -0.98 | 10.36 | 11.34 | 1.51E-09 | 0.000000025 |
| ILMN_1800958 | ALS2CR4  | NM_152388.1    | -1.89 | -0.92 | 12.12 | 13.04 | 1.52E-09 | 2.51E-08    |
| ILMN_1798172 | IPO4     | NM_024658.3    | -2.79 | -1.48 | 9.5   | 10.98 | 1.54E-09 | 2.55E-08    |
| ILMN_1813389 | MRPS7    | NM_015971.2    | -1.73 | -0.79 | 11.53 | 12.32 | 1.56E-09 | 2.57E-08    |
| ILMN_1699206 | KIAA1727 | NM_033393.1    | -2.45 | -1.29 | 8.41  | 9.7   | 1.57E-09 | 2.58E-08    |
| ILMN_1773801 | TGFB111  | NM_015927.3    | -2.33 | -1.22 | 8.48  | 9.7   | 1.58E-09 | 0.000000026 |
| ILMN_1713875 | NME1     | NM_198175.1    | -2.30 | -1.2  | 9.7   | 10.89 | 1.61E-09 | 2.65E-08    |

Supplementary Table 2

|              |             |                |       |       |       |       |          |             |
|--------------|-------------|----------------|-------|-------|-------|-------|----------|-------------|
| ILMN_1803317 | C9ORF114    | NM_016390.2    | -1.99 | -0.99 | 10.97 | 11.95 | 1.62E-09 | 2.66E-08    |
| ILMN_2357855 | NTRK2       | NM_001018065.1 | -2.43 | -1.28 | 9.65  | 10.94 | 1.63E-09 | 2.68E-08    |
| ILMN_1810852 | LAMC1       | NM_002293.2    | -2.58 | -1.37 | 12.73 | 14.1  | 1.68E-09 | 2.76E-08    |
| ILMN_1663401 | LARP6       | NM_197958.1    | -2.50 | -1.32 | 9.93  | 11.25 | 1.7E-09  | 2.78E-08    |
| ILMN_2148796 | MND1        | NM_032117.2    | -2.73 | -1.45 | 8.48  | 9.94  | 1.71E-09 | 0.000000028 |
| ILMN_1769082 | TXNDC5      | NM_030810.2    | -2.91 | -1.54 | 8.78  | 10.32 | 1.74E-09 | 2.84E-08    |
| ILMN_1739645 | ANLN        | NM_018685.2    | -2.68 | -1.42 | 9.16  | 10.59 | 1.78E-09 | 0.000000029 |
| ILMN_1676305 | PTK2        | NM_153831.2    | -2.17 | -1.12 | 8.29  | 9.41  | 1.79E-09 | 2.91E-08    |
| ILMN_1738530 | ATAD3A      | NM_018188.2    | -2.07 | -1.05 | 10.18 | 11.23 | 1.79E-09 | 2.91E-08    |
| ILMN_1663195 | MCM7        | NM_182776.1    | -1.83 | -0.87 | 13.73 | 14.59 | 1.87E-09 | 3.03E-08    |
| ILMN_1801391 | SKP2        | NM_005983.2    | -1.74 | -0.8  | 8.77  | 9.58  | 1.88E-09 | 3.04E-08    |
| ILMN_1722127 | RAD54B      | NM_012415.2    | -1.66 | -0.73 | 10.06 | 10.79 | 1.99E-09 | 3.21E-08    |
| ILMN_1809047 | TBRG4       | NM_004749.2    | -2.58 | -1.37 | 8.94  | 10.31 | 1.99E-09 | 3.21E-08    |
| ILMN_1679382 | CCT2        | NM_006431.2    | -1.72 | -0.78 | 14.02 | 14.8  | 2E-09    | 3.23E-08    |
| ILMN_1726306 | HMBS        | NM_001024382.1 | -2.23 | -1.16 | 11.19 | 12.36 | 2.02E-09 | 3.24E-08    |
| ILMN_2149400 | SPC25       | NM_020675.3    | -2.64 | -1.4  | 7.45  | 8.85  | 2.02E-09 | 3.24E-08    |
| ILMN_1705686 | NRGN        | NM_006176.1    | -2.75 | -1.46 | 8.81  | 10.26 | 2.03E-09 | 3.25E-08    |
| ILMN_2332250 | ACOT7       | NM_007274.3    | -1.74 | -0.8  | 12.52 | 13.32 | 2.09E-09 | 3.35E-08    |
| ILMN_1734229 | SPPL2A      | NM_032802.2    | -1.67 | -0.74 | 11.38 | 12.13 | 2.09E-09 | 3.36E-08    |
| ILMN_2080611 | PDSS1       | NM_014317.3    | -1.71 | -0.77 | 10.77 | 11.55 | 2.1E-09  | 3.36E-08    |
| ILMN_2212354 | WDR46       | NM_005452.4    | -1.88 | -0.91 | 10.83 | 11.73 | 2.11E-09 | 3.37E-08    |
| ILMN_1787186 | NOV         | NM_002514.2    | -3.03 | -1.6  | 8.91  | 10.51 | 2.11E-09 | 3.38E-08    |
| ILMN_1661337 | SRM         | NM_003132.2    | -1.99 | -0.99 | 11.68 | 12.67 | 2.12E-09 | 3.38E-08    |
| ILMN_1796235 | CIRH1A      | NM_032830.1    | -1.69 | -0.76 | 11.87 | 12.64 | 2.17E-09 | 3.46E-08    |
| ILMN_1751086 | DKFZP564J01 | NM_015459.3    | -1.92 | -0.94 | 9.54  | 10.48 | 2.17E-09 | 3.46E-08    |
| ILMN_2360229 | MAPKAP1     | NM_001006618.1 | -2.01 | -1.01 | 11.57 | 12.59 | 2.2E-09  | 0.000000035 |
| ILMN_1758939 | RIPK2       | NM_003821.4    | -2.00 | -1    | 10.55 | 11.55 | 2.22E-09 | 3.52E-08    |
| ILMN_1791002 | SKP2        | NM_032637.2    | -2.43 | -1.28 | 9.47  | 10.75 | 2.25E-09 | 3.58E-08    |
| ILMN_2398489 | OPRS1       | NM_005866.2    | -1.79 | -0.84 | 11.3  | 12.14 | 2.28E-09 | 3.62E-08    |
| ILMN_1708486 | CNN2        | NM_004368.2    | -2.33 | -1.22 | 8.96  | 10.18 | 2.29E-09 | 3.62E-08    |
| ILMN_1694923 | PTPN9       | NM_002833.2    | -2.11 | -1.08 | 9.66  | 10.74 | 2.3E-09  | 3.64E-08    |
| ILMN_1671257 | DKC1        | NM_001363.2    | -1.67 | -0.74 | 12.73 | 13.48 | 2.3E-09  | 3.64E-08    |
| ILMN_1695357 | FLJ20364    | NM_017785.2    | -1.93 | -0.95 | 10.63 | 11.59 | 2.31E-09 | 3.64E-08    |
| ILMN_1695576 | MRPL24      | NM_024540.2    | -1.67 | -0.74 | 13.03 | 13.77 | 2.31E-09 | 3.65E-08    |
| ILMN_1766169 | BCAT1       | NM_005504.4    | -2.58 | -1.37 | 11.15 | 12.51 | 2.34E-09 | 3.69E-08    |
| ILMN_1779190 | ALKBH8      | NM_138775.1    | -2.22 | -1.15 | 9.63  | 10.78 | 2.37E-09 | 3.74E-08    |
| ILMN_2183510 | ARMET       | NM_006010.2    | -1.77 | -0.82 | 13.51 | 14.33 | 2.4E-09  | 3.78E-08    |
| ILMN_2410194 | SPRED3      | NM_001039616.1 | -2.39 | -1.26 | 7.42  | 8.68  | 2.45E-09 | 3.85E-08    |
| ILMN_1798700 | CHRNA1      | NM_000079.1    | -2.53 | -1.34 | 7.94  | 9.28  | 2.47E-09 | 3.88E-08    |
| ILMN_1765446 | EMP3        | NM_001425.1    | -2.13 | -1.09 | 13.34 | 14.42 | 2.5E-09  | 3.91E-08    |
| ILMN_1740430 | SLC2A4RG    | NM_020062.3    | -2.38 | -1.25 | 9.5   | 10.75 | 2.5E-09  | 3.91E-08    |
| ILMN_2155172 | BXDC2       | NM_018321.3    | -2.03 | -1.02 | 10.51 | 11.53 | 2.5E-09  | 3.91E-08    |
| ILMN_1750101 | S100A11     | NM_005620.1    | -2.06 | -1.04 | 11.34 | 12.38 | 2.53E-09 | 3.96E-08    |

Supplementary Table 2

|              |             |                |       |       |       |       |          |             |
|--------------|-------------|----------------|-------|-------|-------|-------|----------|-------------|
| ILMN_1700306 | OCIAD2      | NM_001014446.1 | -2.55 | -1.35 | 9.72  | 11.07 | 2.57E-09 | 4.01E-08    |
| ILMN_2354211 | RCC1        | NM_001269.3    | -2.43 | -1.28 | 8.72  | 10    | 2.61E-09 | 4.07E-08    |
| ILMN_2392143 | TRAF6       | NM_004620.2    | -1.91 | -0.93 | 9.82  | 10.75 | 2.61E-09 | 4.07E-08    |
| ILMN_2364521 | AXL         | NM_021913.2    | -1.72 | -0.78 | 10.67 | 11.45 | 2.62E-09 | 4.07E-08    |
| ILMN_1788019 | LAMA2       | NM_000426.2    | -2.30 | -1.2  | 8.03  | 9.23  | 2.63E-09 | 4.09E-08    |
| ILMN_1711888 | COBL        | NM_015198.2    | -2.13 | -1.09 | 10.73 | 11.82 | 2.65E-09 | 4.13E-08    |
| ILMN_1748241 | RP11-19J3.3 | NM_001012267.1 | -2.57 | -1.36 | 8.23  | 9.59  | 2.66E-09 | 4.13E-08    |
| ILMN_1663113 | TLL12       | NM_015140.2    | -1.84 | -0.88 | 10.7  | 11.58 | 2.75E-09 | 4.27E-08    |
| ILMN_2061732 | YRDC        | NM_024640.3    | -1.61 | -0.69 | 11.24 | 11.93 | 2.81E-09 | 4.35E-08    |
| ILMN_1774661 | SNRPB       | NM_003091.3    | -2.16 | -1.11 | 12.2  | 13.31 | 2.82E-09 | 4.36E-08    |
| ILMN_2286106 | PAICS       | NM_006452.2    | -2.43 | -1.28 | 7.6   | 8.88  | 2.85E-09 | 4.41E-08    |
| ILMN_1783728 | TBRG4       | NM_199122.1    | -2.03 | -1.02 | 11.07 | 12.09 | 2.86E-09 | 4.42E-08    |
| ILMN_1690822 | VAPA        | NM_003574.4    | -2.50 | -1.32 | 8.23  | 9.55  | 2.88E-09 | 4.45E-08    |
| ILMN_1743714 | CARD10      | NM_014550.3    | -2.71 | -1.44 | 9.1   | 10.54 | 2.94E-09 | 4.52E-08    |
| ILMN_2329679 | TPST2       | NM_001008566.1 | -1.77 | -0.82 | 12.11 | 12.92 | 2.95E-09 | 4.53E-08    |
| ILMN_1726720 | NUSAP1      | NM_016359.2    | -1.83 | -0.87 | 12.56 | 13.43 | 3E-09    | 4.61E-08    |
| ILMN_1727315 | DENND1A     | NM_024820.2    | -2.36 | -1.24 | 8.78  | 10.02 | 3.03E-09 | 4.65E-08    |
| ILMN_1655733 | RFC2        | NM_181471.1    | -2.50 | -1.32 | 9.72  | 11.04 | 3.04E-09 | 4.66E-08    |
| ILMN_1657955 | FMNL3       | NM_198900.2    | -2.41 | -1.27 | 7.67  | 8.94  | 3.13E-09 | 4.78E-08    |
| ILMN_1702822 | NTRK2       | NM_006180.3    | -1.95 | -0.96 | 8.13  | 9.09  | 3.14E-09 | 0.000000048 |
| ILMN_1800634 | NME4        | NM_005009.2    | -1.87 | -0.9  | 13.41 | 14.31 | 3.19E-09 | 4.87E-08    |
| ILMN_1658678 | SAAL1       | NM_138421.1    | -1.67 | -0.74 | 11.32 | 12.06 | 3.22E-09 | 4.91E-08    |
| ILMN_2333319 | PTBP1       | NM_175847.1    | -1.64 | -0.71 | 14.67 | 15.38 | 3.23E-09 | 4.92E-08    |
| ILMN_2316173 | AP1S1       | NM_001283.2    | -1.75 | -0.81 | 12.71 | 13.52 | 3.32E-09 | 5.04E-08    |
| ILMN_2140059 | LAMA4       | NM_002290.2    | -3.56 | -1.83 | 8.25  | 10.08 | 3.36E-09 | 5.09E-08    |
| ILMN_1797184 | PKN3        | NM_013355.3    | -2.27 | -1.18 | 8.07  | 9.25  | 3.4E-09  | 5.15E-08    |
| ILMN_2341952 | MRPL35      | NM_145644.1    | -1.87 | -0.9  | 11.47 | 12.37 | 3.44E-09 | 5.19E-08    |
| ILMN_1699354 | EPHA2       | NM_004431.2    | -2.39 | -1.26 | 8.87  | 10.12 | 3.44E-09 | 5.19E-08    |
| ILMN_1768127 | EBNA1BP2    | NM_006824.1    | -1.59 | -0.67 | 13.24 | 13.91 | 3.49E-09 | 5.26E-08    |
| ILMN_1814213 | PQLC3       | NM_152391.2    | -1.80 | -0.85 | 10.32 | 11.17 | 3.65E-09 | 5.49E-08    |
| ILMN_1680626 | PDIA6       | NM_005742.2    | -1.67 | -0.74 | 11.9  | 12.64 | 3.75E-09 | 5.63E-08    |
| ILMN_1707503 | C1ORF144    | NM_015609.1    | -1.82 | -0.86 | 11.58 | 12.45 | 3.8E-09  | 5.69E-08    |
| ILMN_1753482 | FLJ10661    | NM_152563.1    | -2.07 | -1.05 | 9.4   | 10.45 | 3.84E-09 | 5.74E-08    |
| ILMN_1664303 | HTATIP2     | NM_006410.3    | -2.64 | -1.4  | 7.32  | 8.72  | 3.89E-09 | 0.000000058 |
| ILMN_1736816 | C13ORF3     | NM_145061.3    | -3.10 | -1.63 | 8.88  | 10.51 | 3.9E-09  | 5.82E-08    |
| ILMN_2341793 | CCT7        | NM_001009570.1 | -1.64 | -0.71 | 14.44 | 15.14 | 3.94E-09 | 5.86E-08    |
| ILMN_2242403 | DGUOK       | NM_080916.1    | -1.74 | -0.8  | 11.19 | 12    | 3.95E-09 | 5.88E-08    |
| ILMN_1756676 | PHF19       | NM_001009936.1 | -3.36 | -1.75 | 8.49  | 10.24 | 4.04E-09 | 0.00000006  |
| ILMN_1711331 | MAP1LC3C    | NM_001004343.1 | -1.91 | -0.93 | 9.48  | 10.41 | 4.04E-09 | 0.00000006  |
| ILMN_1671291 | EIF3S2      | NM_003757.1    | -1.58 | -0.66 | 13.43 | 14.09 | 4.14E-09 | 6.13E-08    |
| ILMN_1662954 | CCT7        | NM_006429.2    | -1.78 | -0.83 | 13.03 | 13.87 | 4.15E-09 | 6.14E-08    |
| ILMN_1783276 | NEXN        | NM_144573.1    | -1.93 | -0.95 | 9.99  | 10.94 | 4.21E-09 | 6.21E-08    |
| ILMN_1714067 | NTRK2       | NM_001007097.1 | -2.23 | -1.16 | 9.36  | 10.52 | 4.28E-09 | 6.31E-08    |

Supplementary Table 2

|              |           |                |       |       |       |       |          |             |
|--------------|-----------|----------------|-------|-------|-------|-------|----------|-------------|
| ILMN_2266948 | SLC38A1   | NM_030674.2    | -2.91 | -1.54 | 8.38  | 9.92  | 4.28E-09 | 6.32E-08    |
| ILMN_1751785 | DMRT2     | NM_181872.1    | -2.14 | -1.1  | 7.17  | 8.27  | 4.32E-09 | 6.36E-08    |
| ILMN_1681503 | MCM2      | NM_004526.2    | -1.84 | -0.88 | 11.53 | 12.4  | 4.37E-09 | 6.43E-08    |
| ILMN_1793360 | APITD1    | NM_198544.2    | -1.82 | -0.86 | 10.93 | 11.79 | 4.43E-09 | 0.000000065 |
| ILMN_2132161 | KIF18A    | NM_031217.2    | -3.97 | -1.99 | 8.15  | 10.14 | 4.43E-09 | 0.000000065 |
| ILMN_1782069 | TRAK1     | NM_014965.2    | -1.82 | -0.86 | 10.1  | 10.96 | 4.45E-09 | 6.53E-08    |
| ILMN_1662658 | PUS1      | NM_025215.4    | -1.83 | -0.87 | 11.27 | 12.14 | 4.47E-09 | 6.56E-08    |
| ILMN_2370907 | RAD51L3   | NM_002878.2    | -1.77 | -0.82 | 10.16 | 10.98 | 4.49E-09 | 6.58E-08    |
| ILMN_1752802 | CRR9      | NM_030782.2    | -1.69 | -0.76 | 12.32 | 13.08 | 4.5E-09  | 6.59E-08    |
| ILMN_2408576 | FAM129B   | NM_001035534.1 | -1.95 | -0.96 | 10.18 | 11.14 | 4.5E-09  | 6.59E-08    |
| ILMN_1725193 | IGFBP2    | NM_000597.2    | -1.89 | -0.92 | 13.31 | 14.23 | 4.55E-09 | 6.65E-08    |
| ILMN_1729868 | LOC283377 | NM_207344.1    | -1.85 | -0.89 | 9.17  | 10.06 | 4.59E-09 | 0.000000067 |
| ILMN_2373689 | DIAPH3    | NM_001042517.1 | -2.46 | -1.3  | 8.46  | 9.76  | 4.7E-09  | 6.86E-08    |
| ILMN_1781999 | ABCF2     | NM_005692.3    | -1.66 | -0.73 | 11.35 | 12.08 | 4.72E-09 | 6.87E-08    |
| ILMN_1795383 | RPUSD3    | NM_173659.2    | -1.97 | -0.98 | 10.57 | 11.55 | 4.81E-09 | 0.00000007  |
| ILMN_1748890 | GPR176    | NM_007223.1    | -2.46 | -1.3  | 8.35  | 9.65  | 4.82E-09 | 0.00000007  |
| ILMN_1663032 | FNDC4     | NM_022823.1    | -1.72 | -0.78 | 11.58 | 12.36 | 4.83E-09 | 7.01E-08    |
| ILMN_1738657 | SATB2     | NM_015265.1    | -2.04 | -1.03 | 10.54 | 11.57 | 4.85E-09 | 7.02E-08    |
| ILMN_2175601 | VDAC1     | NM_003374.1    | -1.72 | -0.78 | 13.56 | 14.34 | 4.88E-09 | 7.06E-08    |
| ILMN_1685433 | COL8A1    | NM_020351.2    | -1.85 | -0.89 | 12.64 | 13.53 | 4.89E-09 | 7.07E-08    |
| ILMN_1807106 | LDHA      | NM_005566.1    | -1.68 | -0.75 | 13.88 | 14.64 | 4.91E-09 | 0.000000071 |
| ILMN_1798459 | PPAN      | NM_020230.4    | -2.38 | -1.25 | 8.99  | 10.24 | 4.93E-09 | 7.12E-08    |
| ILMN_2400250 | FAM86A    | NM_201598.1    | -2.66 | -1.41 | 9.32  | 10.73 | 5.05E-09 | 7.28E-08    |
| ILMN_1724293 | KDELR2    | NM_006854.2    | -1.68 | -0.75 | 11.96 | 12.71 | 5.05E-09 | 7.29E-08    |
| ILMN_1673455 | RASAL2    | NM_170692.1    | -1.96 | -0.97 | 9.47  | 10.44 | 5.06E-09 | 7.29E-08    |
| ILMN_1794740 | CD151     | NM_139030.2    | -1.91 | -0.93 | 11.42 | 12.35 | 5.06E-09 | 7.29E-08    |
| ILMN_1733562 | TFB1M     | NM_016020.1    | -2.06 | -1.04 | 10.8  | 11.84 | 5.14E-09 | 7.38E-08    |
| ILMN_1769911 | SLC38A1   | NM_030674.2    | -2.23 | -1.16 | 11.72 | 12.89 | 5.2E-09  | 7.44E-08    |
| ILMN_2399431 | PRPS2     | NM_001039091.1 | -2.17 | -1.12 | 9.92  | 11.04 | 5.25E-09 | 7.51E-08    |
| ILMN_1651776 | FHOD1     | NM_013241.1    | -2.73 | -1.45 | 8.85  | 10.29 | 5.32E-09 | 0.000000076 |
| ILMN_1673773 | GALNTL4   | NM_198516.1    | -1.91 | -0.93 | 8.65  | 9.58  | 5.34E-09 | 7.62E-08    |
| ILMN_1687652 | TGFB3     | NM_003239.1    | -1.82 | -0.86 | 9.35  | 10.21 | 5.42E-09 | 7.71E-08    |
| ILMN_1711470 | UBE2T     | NM_014176.1    | -2.38 | -1.25 | 11.03 | 12.28 | 5.66E-09 | 0.00000008  |
| ILMN_1797693 | BRI3BP    | XM_941876.1    | -2.43 | -1.28 | 8.63  | 9.91  | 5.71E-09 | 8.07E-08    |
| ILMN_1688152 | IL27RA    | NM_004843.2    | -2.04 | -1.03 | 9.07  | 10.1  | 5.74E-09 | 8.11E-08    |
| ILMN_1689972 | RNU3IP2   | NM_004704.3    | -2.25 | -1.17 | 9.14  | 10.31 | 5.75E-09 | 8.11E-08    |
| ILMN_1791006 | AHI1      | NM_017651.3    | -2.13 | -1.09 | 9.81  | 10.9  | 5.85E-09 | 8.23E-08    |
| ILMN_1802252 | GAPDH     | NM_002046.2    | -1.71 | -0.77 | 13.67 | 14.45 | 5.85E-09 | 8.23E-08    |
| ILMN_1653443 | CDK2      | NM_001798.2    | -2.27 | -1.18 | 10.24 | 11.42 | 5.92E-09 | 8.32E-08    |
| ILMN_2409395 | CCNC      | NM_001013399.1 | -1.79 | -0.84 | 11.04 | 11.88 | 6.08E-09 | 8.51E-08    |
| ILMN_1721868 | LOC643995 | XM_930156.1    | -3.20 | -1.68 | 10.79 | 12.47 | 6.2E-09  | 8.67E-08    |
| ILMN_1735461 | DDX21     | NM_004728.2    | -1.72 | -0.78 | 11.79 | 12.57 | 6.29E-09 | 8.76E-08    |
| ILMN_1790659 | GNL3      | NM_206825.1    | -2.07 | -1.05 | 8.11  | 9.15  | 6.44E-09 | 8.97E-08    |

Supplementary Table 2

|              |           |                |       |       |       |       |          |             |
|--------------|-----------|----------------|-------|-------|-------|-------|----------|-------------|
| ILMN_2356578 | TH        | NM_000360.3    | -2.97 | -1.57 | 8.05  | 9.62  | 6.49E-09 | 9.03E-08    |
| ILMN_1691364 | STAT1     | NM_139266.1    | -1.73 | -0.79 | 10.68 | 11.47 | 6.59E-09 | 9.15E-08    |
| ILMN_2187727 | NOC3L     | NM_022451.9    | -2.23 | -1.16 | 10.03 | 11.19 | 6.61E-09 | 9.18E-08    |
| ILMN_1773760 | PAICS     | NM_006452.2    | -1.67 | -0.74 | 13.9  | 14.64 | 6.63E-09 | 0.000000092 |
| ILMN_1729368 | FZD8      | NM_031866.1    | -2.11 | -1.08 | 9.86  | 10.94 | 6.69E-09 | 9.26E-08    |
| ILMN_1659952 | MTMR2     | NM_201281.1    | -1.74 | -0.8  | 10.63 | 11.43 | 6.79E-09 | 9.36E-08    |
| ILMN_2288784 | CCDC34    | NM_030771.1    | -3.01 | -1.59 | 9.3   | 10.88 | 6.89E-09 | 0.000000095 |
| ILMN_1758104 | PRPS2     | NM_002765.2    | -1.84 | -0.88 | 9.8   | 10.67 | 6.97E-09 | 0.000000096 |
| ILMN_1737475 | ABHD11    | NM_148914.2    | -2.17 | -1.12 | 9.42  | 10.54 | 7.13E-09 | 9.79E-08    |
| ILMN_1680129 | NSUN2     | NM_017755.4    | -1.66 | -0.73 | 12.23 | 12.96 | 7.14E-09 | 9.81E-08    |
| ILMN_1806294 | RPS6KA3   | NM_004586.2    | -2.08 | -1.06 | 9.46  | 10.53 | 7.22E-09 | 9.91E-08    |
| ILMN_1741148 | ALDOA     | NM_184041.1    | -1.73 | -0.79 | 14.02 | 14.8  | 7.23E-09 | 9.91E-08    |
| ILMN_1779584 | WDR50     | NM_016001.1    | -1.77 | -0.82 | 10.34 | 11.17 | 7.26E-09 | 9.94E-08    |
| ILMN_2202948 | BUB1      | NM_004336.2    | -4.08 | -2.03 | 8.79  | 10.82 | 7.26E-09 | 9.94E-08    |
| ILMN_2225974 | GCLM      | NM_002061.2    | -1.95 | -0.96 | 8.74  | 9.7   | 7.33E-09 | 0.0000001   |
| ILMN_1710428 | CDC2      | NM_001786.2    | -2.57 | -1.36 | 8.34  | 9.7   | 7.35E-09 | 0.000000101 |
| ILMN_2041293 | SQLE      | NM_003129.3    | -1.79 | -0.84 | 12.87 | 13.71 | 7.38E-09 | 0.000000101 |
| ILMN_1719543 | MAF       | NM_005360.3    | -2.11 | -1.08 | 9.73  | 10.8  | 7.45E-09 | 0.000000102 |
| ILMN_2138765 | ADFP      | NM_001122.2    | -1.85 | -0.89 | 12.42 | 13.31 | 7.61E-09 | 0.000000104 |
| ILMN_1697348 | WBSCR22   | NM_017528.2    | -1.59 | -0.67 | 12.18 | 12.86 | 7.62E-09 | 0.000000104 |
| ILMN_1710479 | RGMB      | NM_173670.2    | -1.95 | -0.96 | 8.77  | 9.74  | 7.62E-09 | 0.000000104 |
| ILMN_1671557 | PHLDA2    | NM_003311.3    | -2.91 | -1.54 | 8.03  | 9.57  | 7.65E-09 | 0.000000104 |
| ILMN_2101526 | C7ORF24   | NM_024051.2    | -2.04 | -1.03 | 11.44 | 12.47 | 7.76E-09 | 0.000000105 |
| ILMN_1672662 | SLC20A1   | NM_005415.3    | -1.73 | -0.79 | 12.98 | 13.77 | 7.87E-09 | 0.000000107 |
| ILMN_1790537 | MGC24665  | NM_152308.1    | -1.92 | -0.94 | 10.94 | 11.88 | 8.1E-09  | 0.00000011  |
| ILMN_1657862 | AHCY      | NM_000687.1    | -1.68 | -0.75 | 13.47 | 14.22 | 8.16E-09 | 0.00000011  |
| ILMN_1752117 | TMEM55A   | NM_018710.1    | -1.88 | -0.91 | 10.44 | 11.36 | 8.35E-09 | 0.000000113 |
| ILMN_1687724 | LOC642323 | XM_925863.1    | -2.23 | -1.16 | 9.32  | 10.49 | 8.49E-09 | 0.000000114 |
| ILMN_1753183 | CDCA4     | NM_017955.2    | -1.84 | -0.88 | 9.99  | 10.87 | 8.6E-09  | 0.000000116 |
| ILMN_1789775 | WDR74     | NM_018093.1    | -1.66 | -0.73 | 9.86  | 10.59 | 8.63E-09 | 0.000000116 |
| ILMN_1788462 | AMD1      | NM_001033059.1 | -2.43 | -1.28 | 11.44 | 12.72 | 8.79E-09 | 0.000000118 |
| ILMN_1744649 | PSMB5     | NM_002797.2    | -1.54 | -0.62 | 13.62 | 14.24 | 8.87E-09 | 0.000000119 |
| ILMN_1715905 | C20ORF172 | NM_024918.2    | -2.43 | -1.28 | 9.3   | 10.59 | 8.92E-09 | 0.000000119 |
| ILMN_2401822 | FTSJ1     | NM_012280.2    | -1.64 | -0.71 | 11.41 | 12.12 | 8.92E-09 | 0.000000119 |
| ILMN_1662049 | AGPAT5    | NM_018361.2    | -1.77 | -0.82 | 11.94 | 12.76 | 9.08E-09 | 0.000000121 |
| ILMN_1703140 | NEDD4     | NM_198400.1    | -2.10 | -1.07 | 9.88  | 10.95 | 9.09E-09 | 0.000000121 |
| ILMN_1767260 | FLJ32745  | NM_144978.1    | -1.93 | -0.95 | 9.22  | 10.18 | 9.31E-09 | 0.000000124 |
| ILMN_1771224 | C18ORF24  | NM_145060.1    | -2.60 | -1.38 | 9.14  | 10.52 | 9.41E-09 | 0.000000125 |
| ILMN_2393763 | ARPC4     | NM_001024960.1 | -1.78 | -0.83 | 12.99 | 13.82 | 9.43E-09 | 0.000000125 |
| ILMN_1716563 | PRKCB1    | NM_212535.1    | -2.60 | -1.38 | 7.73  | 9.11  | 9.49E-09 | 0.000000126 |
| ILMN_1763745 | FLJ14166  | NM_024565.4    | -2.16 | -1.11 | 8.44  | 9.54  | 9.52E-09 | 0.000000126 |
| ILMN_2377977 | MTRR      | NM_002454.1    | -2.17 | -1.12 | 8.63  | 9.75  | 9.7E-09  | 0.000000129 |
| ILMN_2188264 | CYR61     | NM_001554.3    | -1.88 | -0.91 | 11.13 | 12.04 | 9.74E-09 | 0.000000129 |

Supplementary Table 2

|              |           |                |       |       |       |       |          |             |
|--------------|-----------|----------------|-------|-------|-------|-------|----------|-------------|
| ILMN_1674662 | C15ORF42  | NM_152259.2    | -2.19 | -1.13 | 8.37  | 9.5   | 9.78E-09 | 0.000000129 |
| ILMN_1812570 | SHC1      | NM_183001.3    | -2.69 | -1.43 | 8.66  | 10.08 | 9.84E-09 | 0.00000013  |
| ILMN_2380243 | LOC57228  | NM_001031628.1 | -2.58 | -1.37 | 8.14  | 9.51  | 9.87E-09 | 0.00000013  |
| ILMN_1711799 | C9ORF40   | NM_017998.1    | -1.66 | -0.73 | 9.98  | 10.71 | 9.94E-09 | 0.000000131 |
| ILMN_1660063 | POLE4     | NM_019896.2    | -2.30 | -1.2  | 12.09 | 13.28 | 9.96E-09 | 0.000000131 |
| ILMN_1740185 | TPMT      | NM_000367.2    | -1.83 | -0.87 | 10.3  | 11.16 | 1E-08    | 0.000000132 |
| ILMN_1801664 | POLR3K    | NM_016310.2    | -1.79 | -0.84 | 10.52 | 11.36 | 1.01E-08 | 0.000000133 |
| ILMN_1764431 | COPS6     | NM_006833.4    | -1.89 | -0.92 | 11.88 | 12.8  | 1.03E-08 | 0.000000135 |
| ILMN_1655307 | FLJ14668  | NM_032822.1    | -1.64 | -0.71 | 11.86 | 12.57 | 1.03E-08 | 0.000000136 |
| ILMN_1669070 | MIPEP     | NM_005932.1    | -1.85 | -0.89 | 10.28 | 11.17 | 1.04E-08 | 0.000000136 |
| ILMN_1810901 | RNASEH2A  | NM_006397.2    | -2.17 | -1.12 | 10.6  | 11.72 | 1.04E-08 | 0.000000136 |
| ILMN_1796074 | C18ORF56  | NM_001012716.1 | -1.87 | -0.9  | 10.4  | 11.3  | 1.04E-08 | 0.000000137 |
| ILMN_2413898 | MCM10     | NM_018518.3    | -3.07 | -1.62 | 10.06 | 11.69 | 1.05E-08 | 0.000000137 |
| ILMN_1700380 | ATP6V0A2  | NM_012463.2    | -1.82 | -0.86 | 10.78 | 11.64 | 1.07E-08 | 0.00000014  |
| ILMN_2365686 | ALG8      | NM_001007027.2 | -1.82 | -0.86 | 10.89 | 11.75 | 1.08E-08 | 0.00000014  |
| ILMN_2104356 | COL1A2    | NM_000089.3    | -2.41 | -1.27 | 10.08 | 11.35 | 1.08E-08 | 0.00000014  |
| ILMN_1740170 | C22ORF16  | NM_213720.1    | -2.01 | -1.01 | 12.18 | 13.2  | 1.08E-08 | 0.000000141 |
| ILMN_1682034 | HEY2      | NM_012259.1    | -2.27 | -1.18 | 9.38  | 10.56 | 1.09E-08 | 0.000000142 |
| ILMN_1668345 | OAF       | NM_178507.2    | -1.85 | -0.89 | 12.28 | 13.17 | 1.11E-08 | 0.000000145 |
| ILMN_1709257 | DSCR6     | NM_018962.1    | -3.56 | -1.83 | 8.07  | 9.91  | 1.12E-08 | 0.000000145 |
| ILMN_1763568 | ZDHHC16   | NM_198044.1    | -1.69 | -0.76 | 13.02 | 13.78 | 1.12E-08 | 0.000000145 |
| ILMN_1704972 | TRIM5     | NM_033034.1    | -1.82 | -0.86 | 11.3  | 12.16 | 1.15E-08 | 0.000000149 |
| ILMN_2404665 | TRIM5     | NM_033093.1    | -1.78 | -0.83 | 10.14 | 10.97 | 1.15E-08 | 0.000000149 |
| ILMN_1775926 | SPATA6    | NM_019073.1    | -1.85 | -0.89 | 9.29  | 10.18 | 1.19E-08 | 0.000000154 |
| ILMN_1701386 | ALS2CR2   | NM_018571.4    | -1.65 | -0.72 | 12.31 | 13.03 | 1.21E-08 | 0.000000155 |
| ILMN_1704238 | C14ORF126 | NM_080664.1    | -1.85 | -0.89 | 9.34  | 10.23 | 1.24E-08 | 0.000000158 |
| ILMN_1725612 | NUP50     | NM_153645.1    | -1.93 | -0.95 | 10.1  | 11.04 | 1.24E-08 | 0.000000159 |
| ILMN_1763523 | HARS      | NM_002109.3    | -1.71 | -0.77 | 12.36 | 13.13 | 1.27E-08 | 0.000000162 |
| ILMN_2091792 | ENTPD6    | NM_001247.1    | -1.99 | -0.99 | 11    | 11.99 | 1.27E-08 | 0.000000162 |
| ILMN_1726574 | CACYBP    | NM_014412.2    | -1.65 | -0.72 | 11.92 | 12.64 | 1.28E-08 | 0.000000164 |
| ILMN_2364529 | EZH2      | NM_152998.1    | -1.59 | -0.67 | 11.22 | 11.88 | 1.3E-08  | 0.000000166 |
| ILMN_1788099 | LSM4      | NM_012321.2    | -1.75 | -0.81 | 13.21 | 14.02 | 1.3E-08  | 0.000000166 |
| ILMN_2312719 | EXOSC9    | NM_001034194.1 | -1.89 | -0.92 | 10.04 | 10.96 | 1.32E-08 | 0.000000168 |
| ILMN_1790062 | FAM105B   | NM_138348.3    | -1.64 | -0.71 | 9.92  | 10.63 | 1.32E-08 | 0.000000168 |
| ILMN_1781560 | ST3GAL6   | NM_006100.2    | -2.50 | -1.32 | 9.02  | 10.34 | 1.34E-08 | 0.000000171 |
| ILMN_1737728 | CDCA3     | NM_031299.3    | -3.20 | -1.68 | 9.34  | 11.02 | 1.37E-08 | 0.000000174 |
| ILMN_1785330 | SH3BP4    | NM_014521.1    | -1.79 | -0.84 | 12.37 | 13.21 | 1.37E-08 | 0.000000174 |
| ILMN_1651557 | KDELC2    | NM_153705.2    | -2.08 | -1.06 | 10.13 | 11.18 | 1.38E-08 | 0.000000175 |
| ILMN_1748476 | NOP5/NOP5 | NM_015934.3    | -1.83 | -0.87 | 10.65 | 11.52 | 1.39E-08 | 0.000000176 |
| ILMN_1720114 | GMNN      | NM_015895.3    | -3.16 | -1.66 | 9.2   | 10.86 | 1.4E-08  | 0.000000177 |
| ILMN_2141259 | SPAG5     | NM_006461.3    | -2.22 | -1.15 | 8.85  | 10    | 1.42E-08 | 0.000000179 |
| ILMN_1777691 | ARL9      | NM_206919.1    | -2.55 | -1.35 | 8.61  | 9.97  | 1.42E-08 | 0.000000179 |
| ILMN_1717868 | CCT8      | NM_006585.2    | -1.57 | -0.65 | 13.91 | 14.55 | 1.44E-08 | 0.000000181 |

Supplementary Table 2

|              |           |                |       |       |       |       |          |             |
|--------------|-----------|----------------|-------|-------|-------|-------|----------|-------------|
| ILMN_2398995 | MRPL24    | NM_024540.2    | -1.77 | -0.82 | 11.07 | 11.89 | 1.44E-08 | 0.000000182 |
| ILMN_1742260 | SSFA2     | NM_006751.3    | -2.03 | -1.02 | 10.36 | 11.37 | 1.44E-08 | 0.000000182 |
| ILMN_1780292 | MSH5      | NM_002441.2    | -2.16 | -1.11 | 8.02  | 9.14  | 1.45E-08 | 0.000000183 |
| ILMN_2415949 | MRRF      | NM_138777.2    | -2.01 | -1.01 | 10.22 | 11.22 | 1.46E-08 | 0.000000183 |
| ILMN_2261076 | NEDD9     | NM_006403.2    | -2.35 | -1.23 | 8.86  | 10.09 | 1.46E-08 | 0.000000184 |
| ILMN_1664167 | BXDC1     | NM_032194.1    | -1.71 | -0.77 | 12.05 | 12.82 | 1.46E-08 | 0.000000184 |
| ILMN_1722648 | SF3B4     | NM_005850.3    | -1.59 | -0.67 | 13.27 | 13.94 | 1.49E-08 | 0.000000186 |
| ILMN_1673880 | EFEMP1    | NM_004105.2    | -1.97 | -0.98 | 11.65 | 12.63 | 1.49E-08 | 0.000000187 |
| ILMN_2176251 | C20ORF72  | NM_052865.2    | -1.56 | -0.64 | 12.17 | 12.81 | 1.5E-08  | 0.000000188 |
| ILMN_1653612 | KCTD9     | NM_017634.2    | -2.00 | -1    | 8.75  | 9.75  | 1.51E-08 | 0.000000189 |
| ILMN_1810376 | LOC399947 | NM_207645.1    | -2.07 | -1.05 | 8.74  | 9.8   | 1.51E-08 | 0.000000189 |
| ILMN_2364062 | THOC4     | NM_005782.2    | -2.17 | -1.12 | 10.82 | 11.94 | 1.52E-08 | 0.00000019  |
| ILMN_2155272 | PIF1      | NM_025049.2    | -2.22 | -1.15 | 8.21  | 9.36  | 1.54E-08 | 0.000000192 |
| ILMN_2392546 | PAICS     | NM_006452.2    | -1.65 | -0.72 | 14.05 | 14.76 | 1.54E-08 | 0.000000192 |
| ILMN_1765641 | SEMA3A    | NM_006080.1    | -1.78 | -0.83 | 10.91 | 11.74 | 1.55E-08 | 0.000000193 |
| ILMN_1689665 | APPBP1    | NM_003905.3    | -1.59 | -0.67 | 12.62 | 13.29 | 1.55E-08 | 0.000000193 |
| ILMN_1730433 | CD2AP     | NM_012120.1    | -1.82 | -0.86 | 9.34  | 10.2  | 1.55E-08 | 0.000000193 |
| ILMN_1666625 | KIF17     | NM_020816.1    | -2.00 | -1    | 7.4   | 8.4   | 1.57E-08 | 0.000000195 |
| ILMN_2192683 | DHX37     | NM_032656.2    | -1.78 | -0.83 | 11    | 11.83 | 1.57E-08 | 0.000000195 |
| ILMN_1705301 | TEAD4     | NM_201441.1    | -2.35 | -1.23 | 8.93  | 10.17 | 1.57E-08 | 0.000000195 |
| ILMN_1727045 | RASGRP3   | NM_170672.1    | -2.01 | -1.01 | 7.53  | 8.55  | 1.58E-08 | 0.000000196 |
| ILMN_1793615 | ME3       | NM_006680.2    | -2.00 | -1    | 8.89  | 9.89  | 1.59E-08 | 0.000000197 |
| ILMN_2403889 | PRMT5     | NM_001039619.1 | -1.62 | -0.7  | 11.84 | 12.54 | 1.61E-08 | 0.000000199 |
| ILMN_1763907 | C6ORF173  | NM_001012507.1 | -2.60 | -1.38 | 9.35  | 10.73 | 1.63E-08 | 0.000000201 |
| ILMN_2174127 | DCBLD2    | NM_080927.3    | -2.10 | -1.07 | 12.37 | 13.45 | 1.66E-08 | 0.000000205 |
| ILMN_1694106 | GPD1L     | NM_015141.2    | -1.77 | -0.82 | 12.25 | 13.07 | 1.67E-08 | 0.000000205 |
| ILMN_1753790 | ZNF259    | NM_003904.3    | -1.78 | -0.83 | 10.17 | 11    | 1.67E-08 | 0.000000206 |
| ILMN_1656111 | MYLIP     | NM_013262.3    | -1.87 | -0.9  | 8.7   | 9.6   | 1.72E-08 | 0.000000211 |
| ILMN_2235137 | FANCD2    | NM_001018115.1 | -2.50 | -1.32 | 10    | 11.32 | 1.75E-08 | 0.000000215 |
| ILMN_2228710 | PDCD5     | NM_004708.2    | -1.79 | -0.84 | 11.74 | 12.58 | 1.76E-08 | 0.000000216 |
| ILMN_1696266 | XRCC3     | NM_005432.2    | -1.80 | -0.85 | 9.11  | 9.96  | 1.78E-08 | 0.000000218 |
| ILMN_1804822 | SRXN1     | NM_080725.1    | -1.65 | -0.72 | 10.99 | 11.71 | 1.79E-08 | 0.000000218 |
| ILMN_1687519 | SNAP23    | NM_003825.2    | -1.78 | -0.83 | 10.25 | 11.08 | 1.8E-08  | 0.000000219 |
| ILMN_2395214 | FMNL3     | NM_198900.2    | -2.95 | -1.56 | 8.48  | 10.03 | 1.82E-08 | 0.000000222 |
| ILMN_1797933 | MRPL17    | NM_022061.2    | -1.80 | -0.85 | 12.11 | 12.97 | 1.82E-08 | 0.000000222 |
| ILMN_1815445 | IDS       | NM_006123.1    | -1.65 | -0.72 | 12.13 | 12.85 | 1.84E-08 | 0.000000223 |
| ILMN_1721968 | NOVA1     | NM_006491.2    | -1.60 | -0.68 | 10.31 | 10.99 | 1.85E-08 | 0.000000224 |
| ILMN_1676846 | ABCE1     | NM_002940.1    | -2.28 | -1.19 | 10.73 | 11.92 | 1.85E-08 | 0.000000225 |
| ILMN_2216852 | PGK1      | NM_000291.2    | -1.75 | -0.81 | 11.49 | 12.3  | 1.87E-08 | 0.000000226 |
| ILMN_1785852 | OBFC2A    | NM_022837.1    | -1.78 | -0.83 | 9.69  | 10.52 | 1.92E-08 | 0.000000232 |
| ILMN_1772286 | OCIAD2    | NM_152398.2    | -2.71 | -1.44 | 8.16  | 9.6   | 1.93E-08 | 0.000000234 |
| ILMN_1808219 | FLJ20718  | NM_182922.1    | -1.89 | -0.92 | 9.81  | 10.73 | 1.94E-08 | 0.000000235 |
| ILMN_1736242 | PLEKHG4   | NM_015432.2    | -2.28 | -1.19 | 7.37  | 8.56  | 1.98E-08 | 0.000000239 |



Supplementary Table 2

|              |           |                |       |       |       |       |          |             |
|--------------|-----------|----------------|-------|-------|-------|-------|----------|-------------|
| ILMN_1806483 | ZWILCH    | NM_017975.2    | -2.50 | -1.32 | 8.18  | 9.49  | 2.02E-08 | 0.000000243 |
| ILMN_2311548 | PTRH2     | NM_016077.3    | -1.82 | -0.86 | 11.56 | 12.42 | 2.05E-08 | 0.000000246 |
| ILMN_1791792 | C12ORF5   | NM_020375.1    | -1.59 | -0.67 | 11.29 | 11.96 | 2.07E-08 | 0.000000248 |
| ILMN_1747911 | CDC2      | NM_033379.2    | -2.85 | -1.51 | 10.76 | 12.26 | 2.09E-08 | 0.000000251 |
| ILMN_1678968 | GEM       | NM_005261.2    | -3.86 | -1.95 | 8.21  | 10.16 | 2.11E-08 | 0.000000253 |
| ILMN_1788283 | COTL1     | NM_021149.2    | -2.41 | -1.27 | 8.83  | 10.1  | 2.12E-08 | 0.000000254 |
| ILMN_1790757 | ADSL      | NM_000026.1    | -1.60 | -0.68 | 13.29 | 13.98 | 2.14E-08 | 0.000000256 |
| ILMN_1748323 | CXCL14    | NM_004887.3    | -2.14 | -1.1  | 11    | 12.1  | 2.15E-08 | 0.000000258 |
| ILMN_1804476 | GMPPA     | NM_013335.2    | -1.73 | -0.79 | 11.29 | 12.07 | 2.16E-08 | 0.000000258 |
| ILMN_2107613 | RHOJ      | NM_020663.2    | -3.23 | -1.69 | 8.74  | 10.43 | 2.16E-08 | 0.000000258 |
| ILMN_2184184 | ANXA1     | NM_000700.1    | -1.54 | -0.62 | 14.46 | 15.09 | 2.17E-08 | 0.000000259 |
| ILMN_1736700 | ALDOA     | NM_184041.1    | -1.88 | -0.91 | 14.49 | 15.4  | 2.19E-08 | 0.000000261 |
| ILMN_1659462 | DUSP23    | NM_017823.3    | -2.22 | -1.15 | 11.43 | 12.59 | 2.2E-08  | 0.000000262 |
| ILMN_2110252 | NPM3      | NM_006993.1    | -1.93 | -0.95 | 11.44 | 12.38 | 2.22E-08 | 0.000000264 |
| ILMN_2409167 | ANXA2     | NM_001002858.1 | -1.62 | -0.7  | 14.94 | 15.64 | 2.29E-08 | 0.000000272 |
| ILMN_1720344 | NIPA2     | NM_030922.5    | -1.54 | -0.62 | 13.19 | 13.81 | 2.3E-08  | 0.000000272 |
| ILMN_1782045 | FKBP4     | NM_002014.2    | -1.60 | -0.68 | 10.86 | 11.54 | 2.32E-08 | 0.000000275 |
| ILMN_2365307 | CD276     | NM_001024736.1 | -1.93 | -0.95 | 12.62 | 13.57 | 2.33E-08 | 0.000000276 |
| ILMN_1805916 | NIPSNAP1  | NM_003634.1    | -1.56 | -0.64 | 12.77 | 13.41 | 2.33E-08 | 0.000000276 |
| ILMN_1804357 | GNG4      | NM_004485.2    | -2.23 | -1.16 | 9.76  | 10.93 | 2.35E-08 | 0.000000278 |
| ILMN_1729596 | C14ORF151 | NM_032714.1    | -2.30 | -1.2  | 8.89  | 10.1  | 2.35E-08 | 0.000000278 |
| ILMN_2387636 | ITGB4BP   | NM_181469.1    | -1.61 | -0.69 | 13.43 | 14.12 | 2.38E-08 | 0.000000281 |
| ILMN_1773493 | TIMM23    | NM_006327.2    | -1.60 | -0.68 | 12.15 | 12.83 | 2.39E-08 | 0.000000282 |
| ILMN_2145670 | TNC       | NM_002160.1    | -2.27 | -1.18 | 11.07 | 12.25 | 2.4E-08  | 0.000000284 |
| ILMN_2072178 | ECHDC3    | NM_024693.2    | -1.89 | -0.92 | 8.5   | 9.42  | 2.41E-08 | 0.000000284 |
| ILMN_1711102 | B3GNT1    | NM_006577.3    | -2.22 | -1.15 | 9.37  | 10.51 | 2.43E-08 | 0.000000286 |
| ILMN_2412860 | MCM4      | NM_182746.1    | -2.25 | -1.17 | 10.4  | 11.57 | 2.46E-08 | 0.000000289 |
| ILMN_1659620 | MYCBP     | NM_012333.3    | -1.93 | -0.95 | 7.93  | 8.88  | 2.46E-08 | 0.000000289 |
| ILMN_1687140 | STARD7    | NM_020151.2    | -2.22 | -1.15 | 9.12  | 10.26 | 2.46E-08 | 0.000000289 |
| ILMN_1775328 | MTG1      | NM_138384.1    | -1.95 | -0.96 | 9.5   | 10.46 | 2.5E-08  | 0.000000293 |
| ILMN_1702817 | B3GNTL1   | NM_001009905.1 | -1.95 | -0.96 | 8.29  | 9.25  | 2.54E-08 | 0.000000298 |
| ILMN_1694240 | MAP2K1    | NM_002755.2    | -1.53 | -0.61 | 12.05 | 12.66 | 2.56E-08 | 0.0000003   |
| ILMN_1729212 | GRM8      | NM_000845.1    | -2.19 | -1.13 | 8.49  | 9.61  | 2.56E-08 | 0.0000003   |
| ILMN_1796210 | PPRC1     | NM_015062.3    | -1.77 | -0.82 | 10.5  | 11.32 | 2.57E-08 | 0.000000301 |
| ILMN_1701877 | AXL       | NM_001699.3    | -1.68 | -0.75 | 10.9  | 11.65 | 2.58E-08 | 0.000000302 |
| ILMN_1695604 | DCBLD1    | NM_173674.1    | -1.84 | -0.88 | 9.48  | 10.36 | 2.59E-08 | 0.000000303 |
| ILMN_1737580 | D15WSU75E | NM_015704.1    | -1.78 | -0.83 | 11.17 | 12    | 2.61E-08 | 0.000000305 |
| ILMN_2049021 | PTTG3     | NR_002734.1    | -2.53 | -1.34 | 11.16 | 12.5  | 2.62E-08 | 0.000000306 |
| ILMN_1782633 | BOLA2     | NM_001031827.1 | -1.87 | -0.9  | 12.99 | 13.89 | 2.62E-08 | 0.000000306 |
| ILMN_1755822 | SYDE1     | NM_033025.4    | -1.79 | -0.84 | 10.61 | 11.46 | 2.63E-08 | 0.000000306 |
| ILMN_1657395 | HMGCR     | NM_000859.1    | -1.85 | -0.89 | 12.79 | 13.67 | 2.63E-08 | 0.000000307 |
| ILMN_1726391 | MRPL39    | NM_017446.2    | -1.58 | -0.66 | 12.05 | 12.71 | 2.67E-08 | 0.000000311 |
| ILMN_1691237 | CAP2      | NM_006366.2    | -1.52 | -0.6  | 12.71 | 13.32 | 2.7E-08  | 0.000000314 |

Supplementary Table 2

|              |           |                |       |       |       |       |          |             |
|--------------|-----------|----------------|-------|-------|-------|-------|----------|-------------|
| ILMN_1708101 | LMNB2     | NM_032737.2    | -1.71 | -0.77 | 13.09 | 13.86 | 2.7E-08  | 0.000000315 |
| ILMN_1712432 | PSMD2     | NM_002808.3    | -1.60 | -0.68 | 13.24 | 13.92 | 2.72E-08 | 0.000000317 |
| ILMN_1680591 | RTKN      | NM_001015055.1 | -1.93 | -0.95 | 12.11 | 13.06 | 2.72E-08 | 0.000000317 |
| ILMN_1801348 | GOT2      | NM_002080.2    | -1.56 | -0.64 | 13.15 | 13.79 | 2.74E-08 | 0.000000318 |
| ILMN_1716553 | KIF23     | NM_138555.1    | -2.91 | -1.54 | 7.74  | 9.28  | 2.75E-08 | 0.000000319 |
| ILMN_2281069 | GPATCH4   | NM_182679.1    | -2.10 | -1.07 | 7.86  | 8.93  | 2.78E-08 | 0.000000322 |
| ILMN_1659913 | ISG20     | NM_002201.4    | -2.20 | -1.14 | 8.41  | 9.55  | 2.79E-08 | 0.000000323 |
| ILMN_2401436 | PKMYT1    | NM_182687.1    | -2.19 | -1.13 | 8.16  | 9.3   | 2.8E-08  | 0.000000325 |
| ILMN_2367469 | CARS      | NM_001014438.1 | -1.85 | -0.89 | 11.76 | 12.65 | 2.81E-08 | 0.000000326 |
| ILMN_1766408 | CBFB      | NM_001755.2    | -1.82 | -0.86 | 11.47 | 12.32 | 2.83E-08 | 0.000000327 |
| ILMN_1705682 | LEPREL2   | NM_014262.2    | -1.93 | -0.95 | 9.26  | 10.21 | 2.89E-08 | 0.000000334 |
| ILMN_1736130 | C18ORF22  | NM_024805.1    | -1.82 | -0.86 | 9.78  | 10.64 | 2.9E-08  | 0.000000335 |
| ILMN_2189458 | SHQ1      | NM_018130.2    | -1.85 | -0.89 | 9.43  | 10.32 | 2.9E-08  | 0.000000335 |
| ILMN_1733956 | IARS      | NM_002161.2    | -1.97 | -0.98 | 11.92 | 12.9  | 2.92E-08 | 0.000000337 |
| ILMN_1795325 | ACTG2     | NM_001615.3    | -2.38 | -1.25 | 11.01 | 12.26 | 2.94E-08 | 0.000000339 |
| ILMN_1739297 | GALNT4    | NM_003774.3    | -1.66 | -0.73 | 10.09 | 10.82 | 2.95E-08 | 0.00000034  |
| ILMN_1672443 | QDPR      | NM_000320.1    | -1.54 | -0.62 | 14.19 | 14.81 | 2.97E-08 | 0.000000342 |
| ILMN_1730809 | SLC29A2   | NM_001532.2    | -2.48 | -1.31 | 9.08  | 10.38 | 2.99E-08 | 0.000000344 |
| ILMN_1662839 | PLEKHA1   | NM_001001974.1 | -2.36 | -1.24 | 10.33 | 11.57 | 3E-08    | 0.000000345 |
| ILMN_2324994 | IKIP      | NM_201612.1    | -2.11 | -1.08 | 8.46  | 9.53  | 3.02E-08 | 0.000000347 |
| ILMN_1791501 | CHRFAM7A  | NM_139320.1    | -2.03 | -1.02 | 8.47  | 9.49  | 3.02E-08 | 0.000000347 |
| ILMN_1698996 | SLC19A1   | NM_003056.2    | -1.83 | -0.87 | 9.18  | 10.05 | 3.03E-08 | 0.000000348 |
| ILMN_1742230 | BAZ1A     | NM_182648.1    | -2.03 | -1.02 | 10.4  | 11.42 | 3.05E-08 | 0.00000035  |
| ILMN_1733043 | DLG2      | NM_001364.1    | -1.96 | -0.97 | 8.24  | 9.21  | 3.06E-08 | 0.000000351 |
| ILMN_1753607 | LOC56902  | NM_020143.2    | -2.19 | -1.13 | 9.58  | 10.72 | 3.06E-08 | 0.000000351 |
| ILMN_1768816 | TMPO      | NM_003276.1    | -2.07 | -1.05 | 10.54 | 11.58 | 3.17E-08 | 0.000000363 |
| ILMN_2345908 | DDX11     | NM_030653.3    | -2.58 | -1.37 | 8.37  | 9.74  | 3.18E-08 | 0.000000363 |
| ILMN_1797074 | EMG1      | NM_006331.4    | -1.92 | -0.94 | 11.53 | 12.47 | 3.19E-08 | 0.000000364 |
| ILMN_1680344 | MYOM1     | NM_003803.2    | -2.68 | -1.42 | 8.64  | 10.06 | 3.21E-08 | 0.000000367 |
| ILMN_2390162 | PHF11     | NM_001040443.1 | -1.60 | -0.68 | 11.06 | 11.74 | 3.43E-08 | 0.000000391 |
| ILMN_1815723 | NUP35     | NM_138285.3    | -1.77 | -0.82 | 10.6  | 11.42 | 3.49E-08 | 0.000000397 |
| ILMN_2377496 | ERCC1     | NM_001983.2    | -1.62 | -0.7  | 12.19 | 12.9  | 3.5E-08  | 0.000000397 |
| ILMN_1784367 | HSPD1     | NM_002156.4    | -1.84 | -0.88 | 10.25 | 11.13 | 3.51E-08 | 0.000000398 |
| ILMN_1739840 | LRRC8A    | NM_019594.2    | -1.69 | -0.76 | 12.27 | 13.03 | 3.53E-08 | 0.000000399 |
| ILMN_1791905 | LOC388389 | NM_213607.1    | -2.03 | -1.02 | 8.26  | 9.27  | 3.53E-08 | 0.0000004   |
| ILMN_2157099 | CCNA1     | NM_003914.2    | -1.92 | -0.94 | 8.31  | 9.25  | 3.54E-08 | 0.0000004   |
| ILMN_1696407 | SFRS2     | NM_003016.2    | -1.56 | -0.64 | 14.21 | 14.86 | 3.55E-08 | 0.000000401 |
| ILMN_1748034 | KLHDC4    | NM_017566.2    | -1.83 | -0.87 | 10.24 | 11.11 | 3.57E-08 | 0.000000403 |
| ILMN_1781514 | PCDH17    | NM_014459.2    | -1.97 | -0.98 | 10.02 | 11.01 | 3.62E-08 | 0.000000408 |
| ILMN_2048700 | ATAD2     | NM_014109.2    | -2.10 | -1.07 | 10.39 | 11.46 | 3.67E-08 | 0.000000413 |
| ILMN_2161746 | TRIP10    | NM_004240.2    | -1.71 | -0.77 | 9.15  | 9.92  | 3.72E-08 | 0.000000418 |
| ILMN_1787199 | C12ORF28  | NM_182530.1    | -1.92 | -0.94 | 7.79  | 8.73  | 3.72E-08 | 0.000000418 |
| ILMN_1751803 | LSM10     | NM_032881.1    | -1.74 | -0.8  | 11.2  | 12    | 3.73E-08 | 0.000000419 |

Supplementary Table 2

|              |           |                |       |       |       |       |          |             |
|--------------|-----------|----------------|-------|-------|-------|-------|----------|-------------|
| ILMN_2202423 | HELLS     | NM_018063.3    | -3.84 | -1.94 | 8.36  | 10.3  | 3.76E-08 | 0.000000422 |
| ILMN_1671402 | ARPP-21   | NM_001025068.1 | -1.99 | -0.99 | 8.31  | 9.29  | 3.79E-08 | 0.000000424 |
| ILMN_1761486 | FLJ22624  | NM_024808.2    | -2.87 | -1.52 | 8.74  | 10.26 | 3.79E-08 | 0.000000425 |
| ILMN_1809364 | NTF3      | NM_002527.3    | -2.31 | -1.21 | 8.57  | 9.78  | 3.8E-08  | 0.000000425 |
| ILMN_1801869 | WDR75     | NM_032168.1    | -1.55 | -0.63 | 11.57 | 12.2  | 3.81E-08 | 0.000000427 |
| ILMN_1801175 | MAP2K3    | XM_944206.1    | -2.20 | -1.14 | 7.83  | 8.98  | 3.82E-08 | 0.000000427 |
| ILMN_1659285 | DSCR2     | NM_203433.1    | -1.79 | -0.84 | 11.3  | 12.14 | 3.84E-08 | 0.000000429 |
| ILMN_1679880 | WDR58     | NM_024339.2    | -1.68 | -0.75 | 9.83  | 10.58 | 3.93E-08 | 0.000000439 |
| ILMN_1750062 | PPARGC1A  | NM_013261.2    | -2.03 | -1.02 | 8.4   | 9.42  | 3.94E-08 | 0.000000439 |
| ILMN_1779399 | SNRPA     | NM_004596.3    | -1.60 | -0.68 | 11.52 | 12.2  | 4E-08    | 0.000000446 |
| ILMN_1740265 | ACOT7     | NM_181866.2    | -1.58 | -0.66 | 13.39 | 14.05 | 4.07E-08 | 0.000000453 |
| ILMN_1753413 | HRIHFB212 | NM_138632.1    | -2.41 | -1.27 | 9.29  | 10.55 | 4.08E-08 | 0.000000454 |
| ILMN_1776073 | CCT4      | NM_006430.2    | -1.72 | -0.78 | 10.32 | 11.1  | 4.09E-08 | 0.000000455 |
| ILMN_1798373 | KIAA1754L | NM_001008949.1 | -1.95 | -0.96 | 7.44  | 8.4   | 4.14E-08 | 0.000000459 |
| ILMN_1709085 | GSG2      | NM_031965.2    | -2.53 | -1.34 | 8.01  | 9.35  | 4.25E-08 | 0.000000471 |
| ILMN_1758293 | C14ORF130 | NM_175748.1    | -1.93 | -0.95 | 9.64  | 10.58 | 4.25E-08 | 0.000000471 |
| ILMN_1782788 | CSDA      | NM_003651.3    | -1.58 | -0.66 | 13.67 | 14.34 | 4.27E-08 | 0.000000473 |
| ILMN_1788363 | MLH1      | NM_000249.2    | -1.57 | -0.65 | 11.36 | 12    | 4.3E-08  | 0.000000475 |
| ILMN_1722820 | KDELR3    | NM_006855.2    | -2.64 | -1.4  | 8.38  | 9.79  | 4.44E-08 | 0.000000489 |
| ILMN_2351916 | EXO1      | NM_006027.3    | -2.57 | -1.36 | 8.39  | 9.76  | 4.44E-08 | 0.00000049  |
| ILMN_2392803 | COL11A1   | NM_080629.2    | -3.48 | -1.8  | 9.09  | 10.89 | 4.45E-08 | 0.000000491 |
| ILMN_1775742 | RNF128    | NM_024539.3    | -1.91 | -0.93 | 9.12  | 10.05 | 4.49E-08 | 0.000000494 |
| ILMN_1686623 | CSF1R     | NM_005211.2    | -1.92 | -0.94 | 6.99  | 7.92  | 4.52E-08 | 0.000000497 |
| ILMN_1751378 | RARS      | NM_002887.3    | -1.49 | -0.58 | 12.6  | 13.18 | 4.57E-08 | 0.000000501 |
| ILMN_1711030 | OPLAH     | NM_017570.1    | -1.87 | -0.9  | 8.23  | 9.13  | 4.62E-08 | 0.000000506 |
| ILMN_2346573 | PSME3     | NM_005789.2    | -1.57 | -0.65 | 12.18 | 12.82 | 4.62E-08 | 0.000000506 |
| ILMN_1698732 | PALLD     | NM_016081.2    | -1.51 | -0.59 | 12.99 | 13.59 | 4.67E-08 | 0.000000511 |
| ILMN_1690252 | ALKBH2    | NM_001001655.1 | -1.73 | -0.79 | 10.96 | 11.75 | 4.67E-08 | 0.000000511 |
| ILMN_2049274 | ARHGDI3   | NM_001176.2    | -1.66 | -0.73 | 9.48  | 10.21 | 4.71E-08 | 0.000000514 |
| ILMN_1764271 | NXPH1     | NM_152745.1    | -1.74 | -0.8  | 10.37 | 11.17 | 4.72E-08 | 0.000000515 |
| ILMN_2328433 | NOL1      | NM_006170.2    | -1.79 | -0.84 | 9.55  | 10.39 | 4.83E-08 | 0.000000526 |
| ILMN_1707336 | ARPC4     | NM_001024959.1 | -1.61 | -0.69 | 12.7  | 13.39 | 4.85E-08 | 0.000000528 |
| ILMN_2302118 | CCDC50    | NM_174908.2    | -1.58 | -0.66 | 12.09 | 12.75 | 4.85E-08 | 0.000000528 |
| ILMN_1780036 | WDR1      | NM_017491.3    | -1.60 | -0.68 | 14.29 | 14.97 | 4.86E-08 | 0.000000529 |
| ILMN_1708619 | SEH1L     | NM_031216.3    | -1.55 | -0.63 | 10.43 | 11.06 | 4.88E-08 | 0.000000531 |
| ILMN_2315979 | LBH       | NM_030915.1    | -1.64 | -0.71 | 11.27 | 11.98 | 4.94E-08 | 0.000000536 |
| ILMN_1746031 | RIMS4     | NM_182970.2    | -1.85 | -0.89 | 9.09  | 9.98  | 5.02E-08 | 0.000000545 |
| ILMN_1805132 | PCDH19    | NM_020766.1    | -1.95 | -0.96 | 11.15 | 12.11 | 5.04E-08 | 0.000000546 |
| ILMN_2411139 | FIBP      | NM_198897.1    | -1.84 | -0.88 | 10.69 | 11.57 | 5.18E-08 | 0.000000561 |
| ILMN_1751444 | HCAP-G    | NM_022346.3    | -3.86 | -1.95 | 10.22 | 12.17 | 5.19E-08 | 0.000000562 |
| ILMN_1815924 | NUP107    | NM_020401.2    | -1.62 | -0.7  | 11.45 | 12.15 | 5.22E-08 | 0.000000565 |
| ILMN_2407482 | ITPA      | NM_033453.2    | -1.91 | -0.93 | 11.42 | 12.35 | 5.25E-08 | 0.000000567 |
| ILMN_1789510 | STIP1     | NM_006819.1    | -1.57 | -0.65 | 12.75 | 13.41 | 5.31E-08 | 0.000000574 |

Supplementary Table 2

|              |          |                |       |       |       |       |          |             |
|--------------|----------|----------------|-------|-------|-------|-------|----------|-------------|
| ILMN_1758827 | RTN4IP1  | NM_032730.3    | -1.65 | -0.72 | 10.13 | 10.85 | 5.31E-08 | 0.000000574 |
| ILMN_1694587 | EEF1B2   | NM_001959.2    | -1.69 | -0.76 | 14.29 | 15.05 | 5.47E-08 | 0.000000589 |
| ILMN_1775327 | PKM2     | NM_182470.1    | -1.92 | -0.94 | 11.91 | 12.85 | 5.52E-08 | 0.000000593 |
| ILMN_1651262 | HNRPA    | NM_031266.2    | -1.53 | -0.61 | 14.77 | 15.38 | 5.54E-08 | 0.000000596 |
| ILMN_1737163 | SH3BGRL3 | NM_031286.2    | -1.68 | -0.75 | 12.76 | 13.52 | 5.57E-08 | 0.000000598 |
| ILMN_1810834 | MSH5     | XM_936150.1    | -1.84 | -0.88 | 8.22  | 9.1   | 5.76E-08 | 0.000000618 |
| ILMN_1654586 | RASA3    | NM_007368.2    | -1.82 | -0.86 | 9.31  | 10.17 | 5.78E-08 | 0.000000619 |
| ILMN_2401352 | UHRF1    | NM_013282.3    | -2.64 | -1.4  | 8.46  | 9.85  | 5.86E-08 | 0.000000626 |
| ILMN_1755411 | RBMS2    | NM_002898.2    | -1.95 | -0.96 | 9.04  | 10    | 5.95E-08 | 0.000000635 |
| ILMN_1661197 | CLCF1    | NM_013246.2    | -2.08 | -1.06 | 8.76  | 9.82  | 5.96E-08 | 0.000000635 |
| ILMN_1740903 | MGC5242  | NM_024033.1    | -1.77 | -0.82 | 10.1  | 10.92 | 6.05E-08 | 0.000000645 |
| ILMN_2144401 | LOC89944 | NM_138342.2    | -2.14 | -1.1  | 8.25  | 9.36  | 6.08E-08 | 0.000000648 |
| ILMN_1801934 | SERTAD3  | NM_203344.1    | -1.53 | -0.61 | 10.67 | 11.28 | 6.11E-08 | 0.00000065  |
| ILMN_1786697 | TRIM9    | NM_052978.3    | -1.66 | -0.73 | 10.56 | 11.29 | 6.15E-08 | 0.000000654 |
| ILMN_1778255 | FARSLA   | NM_004461.1    | -1.72 | -0.78 | 10.46 | 11.24 | 6.16E-08 | 0.000000655 |
| ILMN_1691508 | PLAUR    | NM_001005376.1 | -2.68 | -1.42 | 8.36  | 9.78  | 6.19E-08 | 0.000000657 |
| ILMN_1708891 | SCFD2    | NM_152540.3    | -2.43 | -1.28 | 8.89  | 10.17 | 6.26E-08 | 0.000000664 |
| ILMN_1727740 | SYNCRIP  | NM_006372.3    | -1.64 | -0.71 | 12.8  | 13.51 | 6.3E-08  | 0.000000668 |
| ILMN_2196569 | NUP93    | NM_014669.2    | -1.54 | -0.62 | 12.6  | 13.22 | 6.35E-08 | 0.000000672 |
| ILMN_1803850 | TSPAN15  | NM_012339.3    | -2.00 | -1    | 8.54  | 9.54  | 6.38E-08 | 0.000000675 |
| ILMN_1713990 | TRIP6    | NM_003302.1    | -1.58 | -0.66 | 13.07 | 13.73 | 6.5E-08  | 0.000000687 |
| ILMN_2267787 | HPS1     | NM_182639.1    | -2.14 | -1.1  | 8.91  | 10.01 | 6.58E-08 | 0.000000695 |
| ILMN_2091347 | IDH1     | NM_005896.2    | -1.64 | -0.71 | 13.5  | 14.21 | 6.71E-08 | 0.000000708 |
| ILMN_1813671 | SLC25A1  | NM_005984.1    | -1.67 | -0.74 | 12.11 | 12.84 | 6.74E-08 | 0.000000711 |
| ILMN_2148012 | EPR1     | NR_002219.1    | -1.82 | -0.86 | 8.26  | 9.12  | 6.81E-08 | 0.000000717 |
| ILMN_2296369 | MATR3    | NM_199189.1    | -2.06 | -1.04 | 7.68  | 8.72  | 6.81E-08 | 0.000000717 |
| ILMN_1741003 | ANXA5    | NM_001154.2    | -1.55 | -0.63 | 14.56 | 15.19 | 6.84E-08 | 0.00000072  |
| ILMN_1761147 | GABPB2   | NM_181427.2    | -1.54 | -0.62 | 10.38 | 11    | 6.89E-08 | 0.000000725 |
| ILMN_2391231 | SORD     | NM_003104.3    | -2.08 | -1.06 | 9.5   | 10.57 | 6.95E-08 | 0.00000073  |
| ILMN_1656826 | SH3MD2   | NM_020870.2    | -2.07 | -1.05 | 9.97  | 11.03 | 6.98E-08 | 0.000000732 |
| ILMN_2368535 | FBXO17   | NM_024907.5    | -2.25 | -1.17 | 7.52  | 8.69  | 7E-08    | 0.000000734 |
| ILMN_1778360 | PYGB     | NM_002862.3    | -2.17 | -1.12 | 12.44 | 13.56 | 7.12E-08 | 0.000000746 |
| ILMN_1651936 | SETD8    | NM_020382.3    | -1.57 | -0.65 | 10.6  | 11.25 | 7.13E-08 | 0.000000747 |
| ILMN_2052208 | GADD45A  | NM_001924.2    | -1.58 | -0.66 | 12.24 | 12.91 | 7.19E-08 | 0.000000752 |
| ILMN_1779875 | THY1     | NM_006288.2    | -1.69 | -0.76 | 10.38 | 11.15 | 7.22E-08 | 0.000000755 |
| ILMN_1655154 | PTBP1    | NM_175847.1    | -1.64 | -0.71 | 13.57 | 14.28 | 7.24E-08 | 0.000000757 |
| ILMN_1699317 | CNTN6    | NM_014461.2    | -2.10 | -1.07 | 8.53  | 9.6   | 7.26E-08 | 0.000000758 |
| ILMN_1772369 | PDHA1    | NM_000284.1    | -1.54 | -0.62 | 11.36 | 11.98 | 7.26E-08 | 0.000000758 |
| ILMN_1746257 | DAZAP1   | NM_018959.2    | -1.61 | -0.69 | 11.05 | 11.74 | 7.26E-08 | 0.000000758 |
| ILMN_1715179 | SNRPA1   | NM_003090.2    | -1.54 | -0.62 | 12.91 | 13.53 | 7.29E-08 | 0.00000076  |
| ILMN_1676215 | FLJ37266 | NM_175892.3    | -1.79 | -0.84 | 10.49 | 11.33 | 7.33E-08 | 0.000000763 |
| ILMN_1777342 | PREX1    | NM_020820.2    | -1.77 | -0.82 | 10.42 | 11.23 | 7.35E-08 | 0.000000765 |
| ILMN_1668270 | ZDHHC18  | NM_032283.1    | -1.60 | -0.68 | 9.56  | 10.24 | 7.43E-08 | 0.000000773 |

Supplementary Table 2

|              |          |                |       |       |       |       |           |             |
|--------------|----------|----------------|-------|-------|-------|-------|-----------|-------------|
| ILMN_2285802 | SEC14L1  | NM_003003.2    | -1.67 | -0.74 | 9.97  | 10.71 | 7.44E-08  | 0.000000773 |
| ILMN_1813741 | KCNJ16   | NM_018658.1    | -1.69 | -0.76 | 7.74  | 8.51  | 7.64E-08  | 0.000000791 |
| ILMN_1812940 | TRMT1    | NM_017722.2    | -1.64 | -0.71 | 10.79 | 11.5  | 7.65E-08  | 0.000000792 |
| ILMN_1772713 | BMS1L    | NM_014753.2    | -1.66 | -0.73 | 11.59 | 12.32 | 7.76E-08  | 0.000000802 |
| ILMN_1655068 | TOM1L2   | NM_144678.3    | -1.85 | -0.89 | 8.94  | 9.83  | 7.77E-08  | 0.000000802 |
| ILMN_2041327 | MRPL37   | NM_016491.2    | -1.58 | -0.66 | 13.45 | 14.11 | 7.83E-08  | 0.000000809 |
| ILMN_2357062 | IL1RAP   | NM_134470.2    | -2.08 | -1.06 | 7.77  | 8.83  | 7.87E-08  | 0.000000812 |
| ILMN_2368575 | GIYD1    | NM_001014999.1 | -2.31 | -1.21 | 10.11 | 11.32 | 7.99E-08  | 0.000000823 |
| ILMN_1664511 | KNTC2    | NM_006101.1    | -2.46 | -1.3  | 8.86  | 10.16 | 8.01E-08  | 0.000000824 |
| ILMN_1660021 | M6PRBP1  | NM_005817.3    | -1.59 | -0.67 | 13.68 | 14.35 | 8.05E-08  | 0.000000828 |
| ILMN_1781966 | OSBP2    | NM_030758.3    | -1.74 | -0.8  | 10.54 | 11.34 | 8.37E-08  | 0.000000857 |
| ILMN_1785914 | CDC6     | NM_001254.3    | -2.33 | -1.22 | 7.64  | 8.85  | 8.53E-08  | 0.000000872 |
| ILMN_1792820 | NOC2L    | NM_015658.1    | -1.87 | -0.9  | 9.08  | 9.98  | 8.56E-08  | 0.000000875 |
| ILMN_1690040 | TM7SF2   | NM_003273.1    | -1.58 | -0.66 | 12.91 | 13.58 | 8.59E-08  | 0.000000878 |
| ILMN_1800889 | KIAA0274 | NM_014845.4    | -1.79 | -0.84 | 9.85  | 10.69 | 8.63E-08  | 0.000000881 |
| ILMN_1689800 | C1ORF33  | NM_016183.2    | -1.99 | -0.99 | 11.07 | 12.06 | 8.7E-08   | 0.000000887 |
| ILMN_1701700 | KLHL4    | NM_019117.3    | -2.04 | -1.03 | 9.51  | 10.54 | 8.7E-08   | 0.000000887 |
| ILMN_1732516 | KNTC1    | NM_014708.3    | -2.17 | -1.12 | 10.31 | 11.43 | 8.73E-08  | 0.000000889 |
| ILMN_1765532 | RDBP     | NM_002904.5    | -2.20 | -1.14 | 9.89  | 11.03 | 8.78E-08  | 0.000000895 |
| ILMN_2202915 | MLSTD1   | NM_018099.3    | -2.85 | -1.51 | 7.81  | 9.31  | 8.8E-08   | 0.000000896 |
| ILMN_1655077 | PRDM1    | NM_001198.2    | -1.96 | -0.97 | 8.51  | 9.48  | 8.81E-08  | 0.000000897 |
| ILMN_2334989 | CCT3     | NM_005998.3    | -1.54 | -0.62 | 13.85 | 14.48 | 8.83E-08  | 0.000000897 |
| ILMN_1703949 | KPNB1    | NM_002265.4    | -1.87 | -0.9  | 13.36 | 14.26 | 8.86E-08  | 0.0000009   |
| ILMN_1790530 | HECTD2   | NM_173497.1    | -1.56 | -0.64 | 9.18  | 9.82  | 8.99E-08  | 0.000000912 |
| ILMN_1702806 | PDCL3    | NM_024065.3    | -1.61 | -0.69 | 12.24 | 12.94 | 9E-08     | 0.000000913 |
| ILMN_1690690 | SEC23IP  | NM_007190.2    | -1.65 | -0.72 | 10.55 | 11.27 | 9.08E-08  | 0.000000919 |
| ILMN_1766154 | MRPL30   | NM_145213.1    | -1.68 | -0.75 | 10.31 | 11.05 | 9.13E-08  | 0.000000923 |
| ILMN_1765880 | C16ORF57 | NM_024598.2    | -1.68 | -0.75 | 10.57 | 11.32 | 9.14E-08  | 0.000000924 |
| ILMN_1807016 | LHX2     | NM_004789.3    | -1.57 | -0.65 | 13.71 | 14.36 | 9.39E-08  | 0.000000947 |
| ILMN_1708160 | KPNA2    | NM_002266.2    | -2.06 | -1.04 | 7.86  | 8.9   | 9.39E-08  | 0.000000947 |
| ILMN_2366634 | PKM2     | NM_182471.1    | -1.75 | -0.81 | 12.75 | 13.57 | 9.58E-08  | 0.000000965 |
| ILMN_1788135 | APITD1   | NM_199295.1    | -2.11 | -1.08 | 9.01  | 10.1  | 9.67E-08  | 0.000000973 |
| ILMN_2119793 | ANKRD34  | NM_001039888.2 | -2.27 | -1.18 | 8.4   | 9.57  | 9.87E-08  | 0.000000992 |
| ILMN_1800530 | CENTG2   | NM_014914.2    | -1.68 | -0.75 | 11.17 | 11.93 | 9.93E-08  | 0.000000996 |
| ILMN_1796925 | CXADR    | NM_001338.3    | -1.53 | -0.61 | 12.87 | 13.48 | 0.0000001 | 0.000001    |
| ILMN_1727790 | KHDRBS3  | NM_006558.1    | -2.25 | -1.17 | 9.96  | 11.14 | 1.01E-07  | 0.00000101  |
| ILMN_2370910 | RAD51L3  | NM_002878.2    | -1.78 | -0.83 | 9.6   | 10.43 | 1.02E-07  | 0.00000102  |
| ILMN_2188374 | XPOT     | NM_007235.3    | -2.01 | -1.01 | 9.97  | 10.98 | 1.02E-07  | 0.00000102  |
| ILMN_1694111 | PNKP     | NM_007254.2    | -1.84 | -0.88 | 11.67 | 12.55 | 1.04E-07  | 0.00000104  |
| ILMN_1652540 | C5ORF16  | NM_173828.3    | -1.88 | -0.91 | 8.55  | 9.46  | 1.05E-07  | 0.00000104  |
| ILMN_2246563 | COL8A1   | NM_001850.3    | -2.66 | -1.41 | 8.04  | 9.45  | 1.05E-07  | 0.00000105  |
| ILMN_1728714 | SSSCA1   | NM_006396.1    | -1.87 | -0.9  | 9.04  | 9.94  | 1.05E-07  | 0.00000105  |
| ILMN_2135798 | TRA16    | NM_176880.4    | -1.97 | -0.98 | 10.4  | 11.38 | 1.06E-07  | 0.00000105  |

Supplementary Table 2

|              |           |                |       |       |       |       |          |            |
|--------------|-----------|----------------|-------|-------|-------|-------|----------|------------|
| ILMN_1814701 | COL9A1    | NM_001851.3    | -2.31 | -1.21 | 7.78  | 9     | 1.07E-07 | 0.00000107 |
| ILMN_1814282 | ISG20L1   | NM_022767.2    | -1.54 | -0.62 | 11.72 | 12.34 | 1.08E-07 | 0.00000107 |
| ILMN_1686097 | TOP2A     | NM_001067.2    | -1.74 | -0.8  | 12.69 | 13.49 | 1.08E-07 | 0.00000107 |
| ILMN_2151817 | PFN1      | NM_005022.2    | -1.51 | -0.59 | 14.8  | 15.39 | 1.08E-07 | 0.00000107 |
| ILMN_1786469 | FBXO22    | NM_012170.2    | -1.54 | -0.62 | 10.73 | 11.35 | 1.08E-07 | 0.00000107 |
| ILMN_2150112 | NRN1      | NM_016588.2    | -2.16 | -1.11 | 8.95  | 10.05 | 1.09E-07 | 0.00000108 |
| ILMN_1660858 | RIN1      | NM_004292.2    | -2.41 | -1.27 | 9.16  | 10.43 | 1.09E-07 | 0.00000108 |
| ILMN_1749930 | TMEM48    | NM_018087.3    | -2.08 | -1.06 | 9.34  | 10.41 | 1.1E-07  | 0.00000109 |
| ILMN_2112301 | DRAP1     | NM_006442.2    | -1.53 | -0.61 | 13.2  | 13.81 | 1.1E-07  | 0.00000109 |
| ILMN_1707051 | NFATC1    | NM_172390.1    | -1.69 | -0.76 | 8.84  | 9.6   | 1.11E-07 | 0.0000011  |
| ILMN_1697268 | EMILIN2   | NM_032048.2    | -1.95 | -0.96 | 7.54  | 8.5   | 1.12E-07 | 0.0000011  |
| ILMN_1690170 | CRABP2    | NM_001878.2    | -2.50 | -1.32 | 8.24  | 9.56  | 1.12E-07 | 0.00000111 |
| ILMN_2189424 | MRPL20    | NM_017971.2    | -1.82 | -0.86 | 11.67 | 12.53 | 1.12E-07 | 0.00000111 |
| ILMN_1696434 | LAMA1     | NM_005559.2    | -2.58 | -1.37 | 8.13  | 9.5   | 1.13E-07 | 0.00000111 |
| ILMN_1666208 | C14ORF106 | NM_018353.3    | -1.69 | -0.76 | 10.52 | 11.27 | 1.13E-07 | 0.00000111 |
| ILMN_2339705 | MED8      | NM_001001651.1 | -1.72 | -0.78 | 9.99  | 10.77 | 1.13E-07 | 0.00000111 |
| ILMN_1764723 | SH3PXD2B  | NM_001017995.1 | -1.96 | -0.97 | 9.97  | 10.94 | 1.13E-07 | 0.00000111 |
| ILMN_2411116 | FGFR1OP   | NM_007045.2    | -1.56 | -0.64 | 9.24  | 9.88  | 1.15E-07 | 0.00000113 |
| ILMN_1674302 | PPAT      | NM_002703.3    | -1.73 | -0.79 | 11.18 | 11.97 | 1.15E-07 | 0.00000113 |
| ILMN_1813374 | C19ORF28  | NM_174983.2    | -2.10 | -1.07 | 9.16  | 10.22 | 1.16E-07 | 0.00000114 |
| ILMN_1680856 | CXORF6    | NM_005491.1    | -1.95 | -0.96 | 10.58 | 11.55 | 1.17E-07 | 0.00000114 |
| ILMN_1694126 | C9ORF48   | NM_194313.1    | -1.82 | -0.86 | 8.55  | 9.41  | 1.17E-07 | 0.00000115 |
| ILMN_1653553 | C14ORF80  | NM_173608.1    | -2.25 | -1.17 | 9.4   | 10.57 | 1.17E-07 | 0.00000115 |
| ILMN_1703314 | C16ORF44  | NM_024731.2    | -1.61 | -0.69 | 10.18 | 10.87 | 1.18E-07 | 0.00000115 |
| ILMN_1694140 | FLJ36748  | NM_152406.1    | -2.19 | -1.13 | 7.82  | 8.94  | 1.18E-07 | 0.00000116 |
| ILMN_1813028 | CBX5      | NM_012117.1    | -1.65 | -0.72 | 11.67 | 12.39 | 1.18E-07 | 0.00000116 |
| ILMN_1757134 | FKSG24    | NM_032683.1    | -1.91 | -0.93 | 9.23  | 10.16 | 1.19E-07 | 0.00000116 |
| ILMN_2056002 | LOC723972 | NR_003144.1    | -1.59 | -0.67 | 11.27 | 11.94 | 1.19E-07 | 0.00000117 |
| ILMN_1701967 | SHC1      | NM_183001.3    | -2.43 | -1.28 | 7.91  | 9.2   | 1.21E-07 | 0.00000118 |
| ILMN_2112402 | PHF5A     | NM_032758.3    | -1.57 | -0.65 | 12.44 | 13.09 | 1.23E-07 | 0.0000012  |
| ILMN_2307032 | OSBPL5    | NM_145638.1    | -1.71 | -0.77 | 10.73 | 11.5  | 1.24E-07 | 0.00000121 |
| ILMN_2234229 | PRMT6     | NM_018137.1    | -1.77 | -0.82 | 11.25 | 12.07 | 1.26E-07 | 0.00000123 |
| ILMN_1757298 | BTBD7     | NM_018167.3    | -1.82 | -0.86 | 8.72  | 9.58  | 1.28E-07 | 0.00000124 |
| ILMN_1743582 | NUDT22    | NM_032344.1    | -1.73 | -0.79 | 10.23 | 11.03 | 1.28E-07 | 0.00000124 |
| ILMN_1794085 | SAPS1     | NM_014931.2    | -1.60 | -0.68 | 9.68  | 10.35 | 1.29E-07 | 0.00000125 |
| ILMN_1755114 | EIF2AK4   | NM_001013703.2 | -1.73 | -0.79 | 10.09 | 10.89 | 1.3E-07  | 0.00000126 |
| ILMN_1693862 | MGC70857  | NM_001001795.1 | -1.57 | -0.65 | 10.31 | 10.96 | 1.31E-07 | 0.00000127 |
| ILMN_1663037 | LRRC4C    | NM_020929.1    | -1.74 | -0.8  | 9.89  | 10.69 | 1.31E-07 | 0.00000127 |
| ILMN_1803997 | SDCCAG3   | NM_006643.2    | -1.59 | -0.67 | 11.8  | 12.47 | 1.31E-07 | 0.00000127 |
| ILMN_2374728 | ARPP-21   | NM_001025068.1 | -1.99 | -0.99 | 8.09  | 9.08  | 1.32E-07 | 0.00000128 |
| ILMN_1704550 | AZIN1     | NM_015878.4    | -1.67 | -0.74 | 9.4   | 10.14 | 1.35E-07 | 0.0000013  |
| ILMN_2179652 | PRELID1   | NM_013237.2    | -1.68 | -0.75 | 12.49 | 13.25 | 1.35E-07 | 0.00000131 |
| ILMN_1702211 | TGIF      | NM_003244.2    | -2.25 | -1.17 | 8.47  | 9.65  | 1.36E-07 | 0.00000131 |

Supplementary Table 2

|              |           |                |       |       |       |       |          |            |
|--------------|-----------|----------------|-------|-------|-------|-------|----------|------------|
| ILMN_1812926 | ANTXR2    | NM_058172.3    | -1.67 | -0.74 | 11.14 | 11.88 | 1.37E-07 | 0.00000133 |
| ILMN_2289825 | ARPP-21   | NM_016300.4    | -2.73 | -1.45 | 7.8   | 9.26  | 1.41E-07 | 0.00000136 |
| ILMN_1811955 | PRMT5     | NM_006109.2    | -1.55 | -0.63 | 12.02 | 12.65 | 1.41E-07 | 0.00000136 |
| ILMN_1815238 | MAP2K3    | NM_145110.1    | -2.06 | -1.04 | 8.06  | 9.1   | 1.42E-07 | 0.00000137 |
| ILMN_1659766 | BAG3      | NM_004281.3    | -1.55 | -0.63 | 12.06 | 12.69 | 1.42E-07 | 0.00000137 |
| ILMN_1726222 | FLOT2     | NM_004475.1    | -1.53 | -0.61 | 13.97 | 14.58 | 1.44E-07 | 0.00000139 |
| ILMN_2234343 | ACP6      | NM_016361.2    | -2.23 | -1.16 | 9.79  | 10.95 | 1.46E-07 | 0.0000014  |
| ILMN_1813207 | MRPS9     | NM_182640.1    | -1.53 | -0.61 | 11.78 | 12.4  | 1.46E-07 | 0.0000014  |
| ILMN_1672547 | MYO9B     | NM_004145.2    | -1.78 | -0.83 | 10.55 | 11.38 | 1.46E-07 | 0.0000014  |
| ILMN_1658818 | CAMK2D    | NM_001221.2    | -2.87 | -1.52 | 8.14  | 9.66  | 1.48E-07 | 0.00000142 |
| ILMN_1673681 | HCP1      | NM_080669.2    | -1.93 | -0.95 | 8.49  | 9.43  | 1.48E-07 | 0.00000142 |
| ILMN_2258268 | GLRX2     | NM_197962.1    | -2.04 | -1.03 | 9.49  | 10.52 | 1.5E-07  | 0.00000143 |
| ILMN_1697777 | TSTA3     | NM_003313.2    | -1.61 | -0.69 | 10.24 | 10.93 | 1.52E-07 | 0.00000146 |
| ILMN_2150402 | TMEM64    | NM_001008495.2 | -2.87 | -1.52 | 8.69  | 10.21 | 1.53E-07 | 0.00000147 |
| ILMN_1786016 | CHD1L     | NM_004284.2    | -1.57 | -0.65 | 9.93  | 10.58 | 1.55E-07 | 0.00000148 |
| ILMN_2115434 | RAB32     | NM_006834.2    | -1.78 | -0.83 | 11.35 | 12.19 | 1.58E-07 | 0.00000151 |
| ILMN_1724789 | CD59      | NM_203329.1    | -1.79 | -0.84 | 10.63 | 11.47 | 1.61E-07 | 0.00000153 |
| ILMN_2051373 | NEK2      | NM_002497.2    | -2.48 | -1.31 | 8.64  | 9.95  | 1.63E-07 | 0.00000155 |
| ILMN_1703330 | FEM1C     | NM_020177.2    | -1.62 | -0.7  | 12.23 | 12.93 | 1.65E-07 | 0.00000157 |
| ILMN_1770905 | SHC3      | NM_016848.2    | -1.88 | -0.91 | 9.64  | 10.55 | 1.66E-07 | 0.00000158 |
| ILMN_1739101 | RBBP8     | NM_002894.2    | -2.33 | -1.22 | 8.22  | 9.44  | 1.69E-07 | 0.00000161 |
| ILMN_2043816 | ARPC5L    | NM_030978.1    | -1.62 | -0.7  | 12.13 | 12.82 | 1.7E-07  | 0.00000162 |
| ILMN_1662334 | DNAJA3    | NM_005147.3    | -1.51 | -0.59 | 12.35 | 12.94 | 1.72E-07 | 0.00000163 |
| ILMN_2318725 | EEF1B2    | NM_001037663.1 | -1.59 | -0.67 | 14.2  | 14.88 | 1.73E-07 | 0.00000164 |
| ILMN_1771903 | NUP37     | NM_024057.2    | -1.66 | -0.73 | 12.35 | 13.09 | 1.76E-07 | 0.00000166 |
| ILMN_1760201 | DNMT1     | NM_001379.1    | -1.88 | -0.91 | 13.06 | 13.97 | 1.76E-07 | 0.00000167 |
| ILMN_1688727 | LOC124512 | XM_940962.1    | -1.74 | -0.8  | 8.91  | 9.71  | 1.77E-07 | 0.00000168 |
| ILMN_1750052 | C4ORF9    | NM_003703.1    | -1.71 | -0.77 | 9.66  | 10.43 | 1.78E-07 | 0.00000169 |
| ILMN_2077623 | RRAS2     | NM_012250.3    | -1.58 | -0.66 | 10.48 | 11.14 | 1.79E-07 | 0.00000169 |
| ILMN_1665797 | CSE1L     | NM_001316.2    | -1.73 | -0.79 | 12.79 | 13.58 | 1.8E-07  | 0.0000017  |
| ILMN_2391355 | STAMPB    | NM_006463.3    | -1.52 | -0.6  | 12.42 | 13.02 | 1.81E-07 | 0.00000171 |
| ILMN_1782993 | DHODH     | NM_001361.3    | -1.85 | -0.89 | 8.11  | 9     | 1.81E-07 | 0.00000171 |
| ILMN_2200331 | H2AFX     | NM_002105.2    | -1.95 | -0.96 | 11.07 | 12.03 | 1.83E-07 | 0.00000172 |
| ILMN_1719170 | WBSCR27   | NM_152559.2    | -2.23 | -1.16 | 7.89  | 9.04  | 1.83E-07 | 0.00000172 |
| ILMN_2377980 | PPP1CA    | NM_002708.3    | -1.57 | -0.65 | 10.45 | 11.1  | 1.86E-07 | 0.00000175 |
| ILMN_2075927 | STK40     | NM_032017.1    | -1.72 | -0.78 | 12.86 | 13.65 | 1.86E-07 | 0.00000175 |
| ILMN_2380999 | RECQL     | NM_032941.1    | -1.58 | -0.66 | 10.76 | 11.42 | 1.87E-07 | 0.00000176 |
| ILMN_1706583 | DLAT      | NM_001931.2    | -1.83 | -0.87 | 10.7  | 11.57 | 1.87E-07 | 0.00000176 |
| ILMN_1787762 | HEATR1    | NM_018072.4    | -1.78 | -0.83 | 10.82 | 11.65 | 1.91E-07 | 0.00000179 |
| ILMN_1757730 | FLJ20272  | NM_017735.3    | -1.58 | -0.66 | 10.85 | 11.51 | 1.92E-07 | 0.0000018  |
| ILMN_1709039 | RPL13     | NM_033251.1    | -2.28 | -1.19 | 9.81  | 11    | 1.92E-07 | 0.0000018  |
| ILMN_1706779 | LIG1      | NM_000234.1    | -1.74 | -0.8  | 10.25 | 11.04 | 1.93E-07 | 0.0000018  |
| ILMN_1653133 | SH3D19    | NM_001009555.2 | -2.45 | -1.29 | 10.25 | 11.53 | 1.93E-07 | 0.0000018  |

Supplementary Table 2

|              |           |                |       |       |       |       |          |            |
|--------------|-----------|----------------|-------|-------|-------|-------|----------|------------|
| ILMN_1779501 | MC5R      | NM_005913.1    | -2.27 | -1.18 | 7.62  | 8.8   | 1.94E-07 | 0.00000181 |
| ILMN_2206645 | ECD       | NM_007265.1    | -1.75 | -0.81 | 10.54 | 11.35 | 1.94E-07 | 0.00000181 |
| ILMN_1673899 | FAM57A    | NM_024792.1    | -1.60 | -0.68 | 12.46 | 13.14 | 1.94E-07 | 0.00000181 |
| ILMN_2386100 | BUB3      | NM_001007793.1 | -2.27 | -1.18 | 10.22 | 11.41 | 1.98E-07 | 0.00000184 |
| ILMN_1711120 | ARC       | NM_015193.3    | -2.39 | -1.26 | 8.29  | 9.55  | 1.98E-07 | 0.00000184 |
| ILMN_1692177 | TSC22D1   | NM_006022.2    | -1.62 | -0.7  | 13.12 | 13.82 | 1.98E-07 | 0.00000184 |
| ILMN_1673380 | GNG12     | NM_018841.3    | -1.73 | -0.79 | 12.14 | 12.94 | 1.98E-07 | 0.00000184 |
| ILMN_1689652 | RNMTL1    | NM_018146.2    | -1.66 | -0.73 | 11.7  | 12.43 | 2.01E-07 | 0.00000186 |
| ILMN_1709953 | DONSON    | NM_017613.2    | -2.19 | -1.13 | 9.05  | 10.18 | 2.01E-07 | 0.00000186 |
| ILMN_1704206 | GPR154    | NM_207172.1    | -2.41 | -1.27 | 9.02  | 10.29 | 2.01E-07 | 0.00000186 |
| ILMN_1665737 | UFD1L     | NM_005659.4    | -1.51 | -0.59 | 9.85  | 10.43 | 2.01E-07 | 0.00000187 |
| ILMN_2184612 | C3ORF52   | NM_024616.1    | -2.00 | -1    | 7.12  | 8.12  | 2.03E-07 | 0.00000188 |
| ILMN_1785175 | SWAP70    | NM_015055.1    | -1.52 | -0.6  | 11.46 | 12.06 | 2.06E-07 | 0.0000019  |
| ILMN_1699737 | TRAP1     | NM_016292.1    | -1.60 | -0.68 | 11.47 | 12.15 | 2.06E-07 | 0.0000019  |
| ILMN_1800975 | PSME3     | NM_005789.2    | -1.53 | -0.61 | 12.31 | 12.92 | 2.08E-07 | 0.00000192 |
| ILMN_2214910 | EPHB4     | NM_004444.4    | -1.84 | -0.88 | 10.02 | 10.9  | 2.11E-07 | 0.00000195 |
| ILMN_1755075 | IDI1      | NM_004508.2    | -2.33 | -1.22 | 9.92  | 11.13 | 2.11E-07 | 0.00000195 |
| ILMN_2191436 | POLA1     | NM_016937.2    | -1.78 | -0.83 | 10.17 | 11    | 2.12E-07 | 0.00000196 |
| ILMN_2057566 | LOC283871 | NM_001042371.2 | -2.39 | -1.26 | 9.32  | 10.59 | 2.13E-07 | 0.00000196 |
| ILMN_1788789 | CHRNA7    | NM_000746.2    | -1.89 | -0.92 | 8.19  | 9.1   | 2.13E-07 | 0.00000196 |
| ILMN_1788955 | PDLIM1    | NM_020992.2    | -1.88 | -0.91 | 10.43 | 11.34 | 2.15E-07 | 0.00000198 |
| ILMN_2302983 | TRPM3     | NM_001007470.1 | -2.10 | -1.07 | 7.59  | 8.66  | 2.15E-07 | 0.00000198 |
| ILMN_1779264 | DSCR2     | NM_003720.2    | -2.06 | -1.04 | 10.61 | 11.64 | 2.16E-07 | 0.00000198 |
| ILMN_1699265 | TNFRSF10B | NM_003842.3    | -1.67 | -0.74 | 12.12 | 12.85 | 2.18E-07 | 0.000002   |
| ILMN_1761939 | FLJ20516  | NM_017858.1    | -2.39 | -1.26 | 9.35  | 10.6  | 2.2E-07  | 0.00000202 |
| ILMN_2361768 | CHRNA1    | NM_001039523.1 | -2.89 | -1.53 | 7.92  | 9.45  | 2.24E-07 | 0.00000205 |
| ILMN_2193315 | C14ORF143 | NM_145231.2    | -1.85 | -0.89 | 9.64  | 10.54 | 2.28E-07 | 0.00000209 |
| ILMN_2189371 | NTNG1     | NM_014917.2    | -2.30 | -1.2  | 9.32  | 10.52 | 2.3E-07  | 0.0000021  |
| ILMN_2277099 | YWHAB     | NM_003404.3    | -1.72 | -0.78 | 10.52 | 11.31 | 2.31E-07 | 0.00000211 |
| ILMN_2041046 | CKS1B     | NM_001826.1    | -1.59 | -0.67 | 12.47 | 13.14 | 2.32E-07 | 0.00000212 |
| ILMN_2403946 | FEZ2      | NM_005102.1    | -1.49 | -0.58 | 13.26 | 13.85 | 2.36E-07 | 0.00000215 |
| ILMN_2383707 | ALDH1A2   | NM_170696.1    | -1.87 | -0.9  | 8.59  | 9.49  | 2.38E-07 | 0.00000216 |
| ILMN_2109156 | RANBP1    | NM_002882.2    | -2.01 | -1.01 | 12.43 | 13.44 | 2.38E-07 | 0.00000216 |
| ILMN_2197365 | RGS2      | NM_002923.1    | -2.36 | -1.24 | 9.87  | 11.11 | 2.39E-07 | 0.00000217 |
| ILMN_2367070 | ACOT9     | NM_001037171.1 | -2.04 | -1.03 | 8.87  | 9.9   | 2.41E-07 | 0.00000219 |
| ILMN_1809467 | VAMP5     | NM_006634.2    | -1.67 | -0.74 | 11.82 | 12.56 | 2.51E-07 | 0.00000227 |
| ILMN_1743933 | ZNF537    | NM_020856.1    | -1.56 | -0.64 | 10.49 | 11.13 | 2.54E-07 | 0.0000023  |
| ILMN_1763207 | SNFT      | NM_018664.1    | -2.08 | -1.06 | 9.52  | 10.58 | 2.55E-07 | 0.0000023  |
| ILMN_1662306 | RABL3     | NM_173825.2    | -1.65 | -0.72 | 10.43 | 11.15 | 2.59E-07 | 0.00000233 |
| ILMN_1680726 | SYTL5     | NM_138780.1    | -2.04 | -1.03 | 8.04  | 9.07  | 2.66E-07 | 0.0000024  |
| ILMN_1723709 | C9ORF116  | NM_144654.1    | -1.84 | -0.88 | 10.62 | 11.5  | 2.67E-07 | 0.0000024  |
| ILMN_1708414 | GNL3L     | NM_019067.3    | -1.64 | -0.71 | 10.41 | 11.11 | 2.67E-07 | 0.00000241 |
| ILMN_1740345 | THYN1     | NM_014174.2    | -1.61 | -0.69 | 10.75 | 11.44 | 2.7E-07  | 0.00000243 |



Supplementary Table 2

|              |          |                |       |       |       |       |          |            |
|--------------|----------|----------------|-------|-------|-------|-------|----------|------------|
| ILMN_1678087 | MAP3K4   | NM_006724.2    | -1.64 | -0.71 | 11.28 | 11.98 | 2.72E-07 | 0.00000245 |
| ILMN_1729117 | COL5A2   | NM_000393.2    | -1.56 | -0.64 | 11.02 | 11.66 | 2.87E-07 | 0.00000257 |
| ILMN_1731043 | TRA2A    | NM_013293.2    | -1.51 | -0.59 | 11.1  | 11.69 | 2.88E-07 | 0.00000257 |
| ILMN_1758339 | CSTF1    | NM_001033521.1 | -1.52 | -0.6  | 9.11  | 9.71  | 2.9E-07  | 0.00000259 |
| ILMN_1673026 | CHCHD3   | NM_017812.1    | -1.53 | -0.61 | 10.94 | 11.55 | 2.91E-07 | 0.00000259 |
| ILMN_1793220 | GART     | NM_175085.1    | -1.54 | -0.62 | 11.47 | 12.1  | 2.92E-07 | 0.00000261 |
| ILMN_2396947 | PSMC3IP  | NM_016556.1    | -2.57 | -1.36 | 8.64  | 10    | 2.93E-07 | 0.00000261 |
| ILMN_2330307 | SLC43A3  | NM_017611.2    | -2.30 | -1.2  | 8.03  | 9.23  | 2.93E-07 | 0.00000261 |
| ILMN_1706246 | CCT5     | NM_012073.3    | -1.65 | -0.72 | 10.06 | 10.78 | 2.96E-07 | 0.00000263 |
| ILMN_2352042 | MRPL4    | NM_146387.1    | -1.72 | -0.78 | 10.48 | 11.26 | 2.97E-07 | 0.00000264 |
| ILMN_1778377 | ERGIC1   | NM_001031711.1 | -1.93 | -0.95 | 9.79  | 10.74 | 2.99E-07 | 0.00000266 |
| ILMN_1689842 | SC4MOL   | NM_006745.3    | -2.33 | -1.22 | 10.94 | 12.16 | 2.99E-07 | 0.00000266 |
| ILMN_2149566 | VPS25    | NM_032353.2    | -1.62 | -0.7  | 11.84 | 12.55 | 3.08E-07 | 0.00000273 |
| ILMN_2405628 | TOP1MT   | NM_052963.1    | -1.51 | -0.59 | 10.54 | 11.13 | 3.08E-07 | 0.00000274 |
| ILMN_2272708 | GIYD1    | NM_001014999.1 | -2.45 | -1.29 | 9     | 10.29 | 3.13E-07 | 0.00000278 |
| ILMN_1725707 | ATG16L1  | NM_030803.5    | -1.57 | -0.65 | 11.18 | 11.83 | 3.13E-07 | 0.00000278 |
| ILMN_1798705 | CCNC     | NM_005190.3    | -1.85 | -0.89 | 10.78 | 11.67 | 3.16E-07 | 0.0000028  |
| ILMN_1727055 | C12ORF48 | NM_017915.1    | -2.55 | -1.35 | 8.75  | 10.1  | 3.18E-07 | 0.00000281 |
| ILMN_1810864 | PMP22    | NM_153321.1    | -1.68 | -0.75 | 11.72 | 12.48 | 3.21E-07 | 0.00000284 |
| ILMN_1755051 | EFHC1    | NM_018100.1    | -1.55 | -0.63 | 10.68 | 11.31 | 3.23E-07 | 0.00000286 |
| ILMN_2365881 | ATG16L1  | NM_017974.3    | -1.55 | -0.63 | 11.31 | 11.95 | 3.23E-07 | 0.00000286 |
| ILMN_2298936 | THOC3    | NM_032361.1    | -1.64 | -0.71 | 11.25 | 11.96 | 3.25E-07 | 0.00000287 |
| ILMN_1654322 | ATP1B3   | NM_001679.2    | -1.56 | -0.64 | 11.42 | 12.06 | 3.27E-07 | 0.00000288 |
| ILMN_2286870 | CSNK1D   | NM_139062.1    | -1.67 | -0.74 | 10.65 | 11.39 | 3.28E-07 | 0.00000289 |
| ILMN_2395043 | HSPA4    | NM_198431.1    | -1.99 | -0.99 | 11.58 | 12.57 | 3.36E-07 | 0.00000295 |
| ILMN_2129859 | FASTKD3  | NM_024091.2    | -1.60 | -0.68 | 9.71  | 10.38 | 3.37E-07 | 0.00000295 |
| ILMN_1711314 | NUDT5    | NM_014142.2    | -1.54 | -0.62 | 12.55 | 13.16 | 3.38E-07 | 0.00000297 |
| ILMN_1812976 | DDX54    | NM_024072.3    | -1.71 | -0.77 | 9.46  | 10.23 | 3.42E-07 | 0.000003   |
| ILMN_1811363 | NOVA1    | NM_006491.2    | -1.78 | -0.83 | 9.96  | 10.79 | 3.46E-07 | 0.00000303 |
| ILMN_2376980 | FSD1     | NM_024333.1    | -2.04 | -1.03 | 9.75  | 10.78 | 3.46E-07 | 0.00000303 |
| ILMN_1654823 | MGC70863 | NM_203302.2    | -1.73 | -0.79 | 9.01  | 9.79  | 3.46E-07 | 0.00000303 |
| ILMN_1764628 | LYPLA2   | NM_007260.2    | -1.62 | -0.7  | 9.99  | 10.69 | 3.47E-07 | 0.00000303 |
| ILMN_2402392 | COL8A1   | NM_020351.2    | -1.95 | -0.96 | 10.79 | 11.75 | 3.47E-07 | 0.00000303 |
| ILMN_1695226 | DIAPH3   | NM_030932.2    | -2.25 | -1.17 | 8.25  | 9.42  | 3.5E-07  | 0.00000305 |
| ILMN_2330966 | PTK2B    | NM_173176.1    | -1.97 | -0.98 | 9.03  | 10.01 | 3.53E-07 | 0.00000308 |
| ILMN_1786041 | ASB9     | NM_024087.1    | -1.62 | -0.7  | 7.11  | 7.81  | 3.53E-07 | 0.00000308 |
| ILMN_1738326 | EIF4E2   | NM_004846.2    | -1.55 | -0.63 | 11.93 | 12.56 | 3.56E-07 | 0.0000031  |
| ILMN_1742779 | C1ORF155 | NM_033319.1    | -1.59 | -0.67 | 10.32 | 10.99 | 3.58E-07 | 0.00000312 |
| ILMN_1656386 | SEC24D   | NM_014822.1    | -2.95 | -1.56 | 8.14  | 9.7   | 3.59E-07 | 0.00000312 |
| ILMN_1741960 | DGKG     | NM_001346.1    | -1.89 | -0.92 | 7.63  | 8.55  | 3.6E-07  | 0.00000313 |
| ILMN_1717357 | PDCD8    | NM_004208.2    | -2.10 | -1.07 | 9.47  | 10.53 | 3.61E-07 | 0.00000314 |
| ILMN_2105966 | SLC35A4  | NM_080670.2    | -1.62 | -0.7  | 11.56 | 12.25 | 3.65E-07 | 0.00000317 |
| ILMN_1761159 | FAM62A   | NM_015292.1    | -1.71 | -0.77 | 11.39 | 12.16 | 3.68E-07 | 0.00000319 |

Supplementary Table 2

|              |          |                |       |       |       |       |           |            |
|--------------|----------|----------------|-------|-------|-------|-------|-----------|------------|
| ILMN_1746393 | TSEN2    | NM_025265.2    | -1.53 | -0.61 | 10.9  | 11.51 | 3.69E-07  | 0.0000032  |
| ILMN_1726520 | TDP1     | NM_018319.3    | -1.72 | -0.78 | 9.42  | 10.21 | 3.72E-07  | 0.00000323 |
| ILMN_1783910 | TRAF6    | NM_004620.2    | -1.96 | -0.97 | 9.27  | 10.24 | 3.73E-07  | 0.00000324 |
| ILMN_2395451 | ASS1     | NM_054012.3    | -1.60 | -0.68 | 11.07 | 11.75 | 3.8E-07   | 0.00000328 |
| ILMN_1655663 | SC65     | NM_006455.2    | -1.58 | -0.66 | 11.41 | 12.08 | 3.8E-07   | 0.00000329 |
| ILMN_1815130 | MICAL-L1 | NM_033386.2    | -2.14 | -1.1  | 8.45  | 9.55  | 3.81E-07  | 0.00000329 |
| ILMN_1690464 | TMEM20   | NM_153226.1    | -1.82 | -0.86 | 7.86  | 8.72  | 3.84E-07  | 0.00000331 |
| ILMN_2341254 | STARD13  | NM_178006.1    | -1.68 | -0.75 | 9.22  | 9.97  | 3.86E-07  | 0.00000333 |
| ILMN_1712505 | KDELC1   | NM_024089.1    | -1.82 | -0.86 | 9.5   | 10.35 | 3.88E-07  | 0.00000334 |
| ILMN_1745271 | EXOSC4   | NM_019037.2    | -1.96 | -0.97 | 10.4  | 11.37 | 3.94E-07  | 0.00000339 |
| ILMN_1720926 | PSMD5    | NM_005047.2    | -1.51 | -0.59 | 10.4  | 10.99 | 3.99E-07  | 0.00000343 |
| ILMN_1799819 | MARS     | NM_004990.2    | -1.53 | -0.61 | 11.01 | 11.62 | 0.0000004 | 0.00000344 |
| ILMN_1730391 | MRPS18A  | NM_018135.2    | -1.97 | -0.98 | 10.75 | 11.72 | 4.01E-07  | 0.00000345 |
| ILMN_1679405 | DDX56    | NM_019082.2    | -1.51 | -0.59 | 11.96 | 12.55 | 4.03E-07  | 0.00000346 |
| ILMN_1765558 | NPAS2    | NM_002518.3    | -2.06 | -1.04 | 9     | 10.04 | 4.05E-07  | 0.00000347 |
| ILMN_1782141 | GRHL3    | NM_021180.2    | -2.11 | -1.08 | 7.22  | 8.3   | 4.07E-07  | 0.00000349 |
| ILMN_1752455 | DOCK5    | NM_024940.4    | -1.71 | -0.77 | 7.97  | 8.74  | 4.11E-07  | 0.00000352 |
| ILMN_1767523 | IL17RB   | NM_172234.1    | -1.53 | -0.61 | 9.64  | 10.26 | 4.16E-07  | 0.00000356 |
| ILMN_2413899 | MCM10    | NM_018518.3    | -2.85 | -1.51 | 8.52  | 10.02 | 4.19E-07  | 0.00000359 |
| ILMN_1788377 | COL27A1  | NM_032888.2    | -2.10 | -1.07 | 7.6   | 8.67  | 4.23E-07  | 0.00000362 |
| ILMN_1706238 | CSE1L    | NM_177436.1    | -1.67 | -0.74 | 13.28 | 14.02 | 4.23E-07  | 0.00000362 |
| ILMN_1776582 | PDK3     | NM_005391.1    | -1.82 | -0.86 | 9.4   | 10.26 | 4.24E-07  | 0.00000362 |
| ILMN_1698209 | AGPS     | NM_003659.1    | -1.60 | -0.68 | 10.59 | 11.27 | 4.26E-07  | 0.00000363 |
| ILMN_1724493 | LYSMD2   | NM_153374.1    | -1.53 | -0.61 | 11.05 | 11.66 | 4.26E-07  | 0.00000363 |
| ILMN_1708077 | DAXX     | NM_001350.3    | -1.69 | -0.76 | 10.18 | 10.94 | 4.29E-07  | 0.00000365 |
| ILMN_2054121 | UNQ3045  | NM_207409.1    | -1.87 | -0.9  | 7.17  | 8.08  | 4.32E-07  | 0.00000368 |
| ILMN_1795007 | FLJ22555 | NM_024520.1    | -1.56 | -0.64 | 11.67 | 12.3  | 4.35E-07  | 0.0000037  |
| ILMN_1692335 | ELK3     | NM_005230.2    | -2.04 | -1.03 | 7.82  | 8.85  | 4.38E-07  | 0.00000372 |
| ILMN_1685472 | LRRTM4   | NM_024993.3    | -1.68 | -0.75 | 9.58  | 10.33 | 4.41E-07  | 0.00000375 |
| ILMN_1710668 | LETM1    | NM_012318.1    | -1.68 | -0.75 | 9.37  | 10.12 | 4.46E-07  | 0.00000378 |
| ILMN_1791569 | PLXNA1   | NM_032242.2    | -1.92 | -0.94 | 10.08 | 11.02 | 4.47E-07  | 0.00000379 |
| ILMN_1768705 | SYT4     | NM_020783.2    | -1.68 | -0.75 | 8.47  | 9.22  | 4.51E-07  | 0.00000382 |
| ILMN_1709484 | BLM      | NM_000057.1    | -2.28 | -1.19 | 8.76  | 9.94  | 4.54E-07  | 0.00000384 |
| ILMN_1779147 | ENC1     | NM_003633.1    | -1.57 | -0.65 | 13.82 | 14.47 | 4.61E-07  | 0.0000039  |
| ILMN_1735743 | FLJ37440 | NM_153214.1    | -1.87 | -0.9  | 8.79  | 9.69  | 4.61E-07  | 0.0000039  |
| ILMN_1797307 | BUB1B    | NM_001211.4    | -1.97 | -0.98 | 8.66  | 9.64  | 4.66E-07  | 0.00000394 |
| ILMN_1695773 | STK24    | NM_001032296.1 | -1.77 | -0.82 | 8.34  | 9.15  | 4.73E-07  | 0.00000399 |
| ILMN_1721657 | RSU1     | NM_152724.2    | -2.06 | -1.04 | 9.64  | 10.68 | 4.78E-07  | 0.00000403 |
| ILMN_2371964 | MRPS12   | NM_033363.1    | -1.71 | -0.77 | 12.2  | 12.97 | 4.78E-07  | 0.00000403 |
| ILMN_1702105 | EFS      | NM_005864.2    | -1.55 | -0.63 | 10.22 | 10.85 | 4.8E-07   | 0.00000404 |
| ILMN_1815345 | EIF3S1   | NM_003758.1    | -1.58 | -0.66 | 11.29 | 11.95 | 4.86E-07  | 0.00000408 |
| ILMN_2205935 | SFXN1    | NM_022754.4    | -1.79 | -0.84 | 10.65 | 11.49 | 4.87E-07  | 0.00000409 |
| ILMN_1717925 | OPRS1    | NM_147160.2    | -1.72 | -0.78 | 9.29  | 10.08 | 4.89E-07  | 0.0000041  |

Supplementary Table 2

|              |           |                |       |       |       |       |          |            |
|--------------|-----------|----------------|-------|-------|-------|-------|----------|------------|
| ILMN_2154950 | ZNF423    | NM_015069.2    | -1.64 | -0.71 | 11.34 | 12.05 | 5.05E-07 | 0.00000423 |
| ILMN_1752502 | HKDC1     | NM_025130.2    | -1.82 | -0.86 | 9.21  | 10.07 | 5.06E-07 | 0.00000424 |
| ILMN_1744308 | DHX33     | NM_020162.2    | -1.53 | -0.61 | 11.13 | 11.74 | 5.07E-07 | 0.00000424 |
| ILMN_1768975 | MGC26856  | NM_152779.1    | -2.30 | -1.2  | 7.98  | 9.18  | 5.07E-07 | 0.00000425 |
| ILMN_1804090 | SLC25A10  | NM_012140.3    | -2.33 | -1.22 | 9.34  | 10.56 | 5.13E-07 | 0.00000429 |
| ILMN_1770206 | GEMIN4    | NM_015721.1    | -1.56 | -0.64 | 12.05 | 12.7  | 5.16E-07 | 0.00000431 |
| ILMN_1810782 | SH3KBP1   | NM_031892.1    | -1.57 | -0.65 | 12.1  | 12.75 | 5.22E-07 | 0.00000436 |
| ILMN_2365528 | NY-SAR-48 | NM_033417.1    | -1.88 | -0.91 | 9.43  | 10.34 | 5.25E-07 | 0.00000438 |
| ILMN_1768293 | NUP155    | NM_004298.2    | -1.59 | -0.67 | 10.93 | 11.6  | 5.27E-07 | 0.0000044  |
| ILMN_1808071 | KIF14     | NM_014875.1    | -2.69 | -1.43 | 9.57  | 11    | 5.27E-07 | 0.0000044  |
| ILMN_1773095 | LOC283755 | NM_001024682.1 | -2.14 | -1.1  | 8.13  | 9.23  | 5.32E-07 | 0.00000443 |
| ILMN_1718672 | NOLA2     | NM_017838.3    | -1.64 | -0.71 | 12.56 | 13.27 | 5.33E-07 | 0.00000444 |
| ILMN_1773427 | ANKRD15   | NM_153186.3    | -1.79 | -0.84 | 11.14 | 11.99 | 5.39E-07 | 0.00000449 |
| ILMN_1716446 | BCL10     | NM_003921.2    | -1.51 | -0.59 | 9.65  | 10.23 | 5.45E-07 | 0.00000453 |
| ILMN_1706118 | C16ORF34  | NM_144570.2    | -1.54 | -0.62 | 10.14 | 10.76 | 5.47E-07 | 0.00000454 |
| ILMN_1801043 | GSN       | NM_198252.1    | -1.56 | -0.64 | 10.44 | 11.08 | 5.49E-07 | 0.00000455 |
| ILMN_2386040 | MYOHD1    | NM_001033580.1 | -1.71 | -0.77 | 7.93  | 8.7   | 5.49E-07 | 0.00000455 |
| ILMN_1715024 | LSS       | NM_002340.3    | -1.74 | -0.8  | 12.17 | 12.97 | 5.5E-07  | 0.00000455 |
| ILMN_1660111 | UCHL3     | NM_006002.3    | -1.56 | -0.64 | 11.36 | 12    | 5.55E-07 | 0.00000459 |
| ILMN_1743499 | POLDIP2   | NM_015584.2    | -1.55 | -0.63 | 10.67 | 11.3  | 5.56E-07 | 0.0000046  |
| ILMN_1656293 | GOSR2     | NM_054022.2    | -1.64 | -0.71 | 10.73 | 11.44 | 5.56E-07 | 0.0000046  |
| ILMN_1669572 | RNF126    | NM_194460.1    | -1.65 | -0.72 | 10.31 | 11.03 | 5.58E-07 | 0.00000461 |
| ILMN_1716838 | C21ORF56  | NM_032261.3    | -1.85 | -0.89 | 10.17 | 11.07 | 5.65E-07 | 0.00000466 |
| ILMN_1679476 | GART      | NM_000819.3    | -1.57 | -0.65 | 11.99 | 12.64 | 5.67E-07 | 0.00000468 |
| ILMN_1695423 | CD9       | NM_001769.2    | -1.77 | -0.82 | 10.11 | 10.93 | 5.72E-07 | 0.00000472 |
| ILMN_1761594 | FAM35A    | NM_019054.1    | -1.95 | -0.96 | 8.56  | 9.52  | 5.77E-07 | 0.00000475 |
| ILMN_1806293 | LIN7A     | NM_004664.2    | -1.75 | -0.81 | 8.85  | 9.66  | 5.81E-07 | 0.00000478 |
| ILMN_2324989 | IKIP      | NM_201612.1    | -1.88 | -0.91 | 8.32  | 9.23  | 5.81E-07 | 0.00000478 |
| ILMN_2320888 | CXCR4     | NM_001008540.1 | -1.52 | -0.6  | 10.55 | 11.15 | 5.85E-07 | 0.00000481 |
| ILMN_1757636 | MGC33648  | NM_153706.2    | -1.66 | -0.73 | 10.74 | 11.47 | 5.92E-07 | 0.00000486 |
| ILMN_1787370 | PRO1853   | NM_144736.3    | -1.66 | -0.73 | 9.4   | 10.13 | 5.95E-07 | 0.00000488 |
| ILMN_1734742 | ARHGDI1   | NM_004309.3    | -1.68 | -0.75 | 12.78 | 13.53 | 5.98E-07 | 0.0000049  |
| ILMN_1682930 | SIPA1     | NM_153253.28   | -2.10 | -1.07 | 9.75  | 10.82 | 5.98E-07 | 0.0000049  |
| ILMN_1712040 | FARP1     | NM_001001715.1 | -1.84 | -0.88 | 8.62  | 9.5   | 6.1E-07  | 0.00000498 |
| ILMN_1698307 | DBNL      | NM_014063.5    | -1.49 | -0.58 | 13.13 | 13.71 | 6.15E-07 | 0.00000502 |
| ILMN_1761181 | NOL9      | NM_024654.3    | -1.66 | -0.73 | 8.74  | 9.47  | 6.17E-07 | 0.00000503 |
| ILMN_1754988 | C21ORF127 | NM_013240.2    | -1.69 | -0.76 | 9.45  | 10.21 | 6.23E-07 | 0.00000508 |
| ILMN_2244484 | CCBL2     | NM_001008661.1 | -1.59 | -0.67 | 10.08 | 10.75 | 6.26E-07 | 0.0000051  |
| ILMN_2368713 | KUA-UEV   | NM_003349.4    | -1.65 | -0.72 | 10.14 | 10.87 | 6.33E-07 | 0.00000515 |
| ILMN_1738819 | EFTUD2    | NM_004247.2    | -1.64 | -0.71 | 12.25 | 12.96 | 6.41E-07 | 0.00000521 |
| ILMN_1730202 | MAGEF1    | NM_022149.4    | -1.53 | -0.61 | 10.99 | 11.6  | 6.47E-07 | 0.00000525 |
| ILMN_1801584 | CXCR4     | NM_003467.2    | -1.73 | -0.79 | 11.78 | 12.56 | 6.49E-07 | 0.00000526 |
| ILMN_2221564 | LYAR      | NM_017816.1    | -1.71 | -0.77 | 10.29 | 11.06 | 6.59E-07 | 0.00000534 |

Supplementary Table 2

|              |          |                |       |       |       |       |          |            |
|--------------|----------|----------------|-------|-------|-------|-------|----------|------------|
| ILMN_1803398 | SRF      | NM_003131.2    | -1.56 | -0.64 | 12.42 | 13.05 | 6.6E-07  | 0.00000534 |
| ILMN_1659189 | C9ORF89  | NM_032310.2    | -1.71 | -0.77 | 10.71 | 11.47 | 6.67E-07 | 0.00000054 |
| ILMN_1676191 | DARS2    | NM_018122.3    | -1.77 | -0.82 | 9.9   | 10.72 | 6.76E-07 | 0.00000547 |
| ILMN_1713505 | NPC1     | NM_000271.1    | -1.83 | -0.87 | 10.54 | 11.42 | 6.82E-07 | 0.00000551 |
| ILMN_1674243 | TFRC     | NM_003234.1    | -1.79 | -0.84 | 12.76 | 13.6  | 6.88E-07 | 0.00000555 |
| ILMN_1712122 | FANCD2   | NM_001018115.1 | -1.74 | -0.8  | 8.4   | 9.19  | 6.95E-07 | 0.0000056  |
| ILMN_2219351 | CENPO    | NM_024322.1    | -1.92 | -0.94 | 8.39  | 9.33  | 6.97E-07 | 0.00000562 |
| ILMN_1802557 | HEBP1    | NM_015987.3    | -1.87 | -0.9  | 10.26 | 11.16 | 7.05E-07 | 0.00000568 |
| ILMN_1720482 | BM88     | NM_016564.2    | -1.64 | -0.71 | 10.3  | 11.01 | 7.11E-07 | 0.00000572 |
| ILMN_1815552 | NTAN1    | NM_173474.2    | -1.59 | -0.67 | 11.37 | 12.04 | 7.15E-07 | 0.00000575 |
| ILMN_1688953 | ARHGAP19 | NM_032900.4    | -1.68 | -0.75 | 11.53 | 12.28 | 7.19E-07 | 0.00000578 |
| ILMN_1746686 | POLR1C   | NM_203290.1    | -1.54 | -0.62 | 11.68 | 12.31 | 7.2E-07  | 0.00000579 |
| ILMN_1744244 | DPAGT1   | NM_001382.2    | -1.80 | -0.85 | 9.73  | 10.58 | 7.27E-07 | 0.00000584 |
| ILMN_2110167 | POLR1E   | NM_022490.1    | -1.54 | -0.62 | 12.01 | 12.64 | 7.38E-07 | 0.00000593 |
| ILMN_1742461 | UAP1     | NM_003115.3    | -1.93 | -0.95 | 9.47  | 10.42 | 7.39E-07 | 0.00000593 |
| ILMN_1798838 | CTTN     | NM_005231.2    | -2.00 | -1    | 8.67  | 9.67  | 7.42E-07 | 0.00000595 |
| ILMN_1720764 | UBE1     | NM_153280.1    | -2.17 | -1.12 | 8.52  | 9.64  | 7.45E-07 | 0.00000597 |
| ILMN_2395236 | CHEK2    | NM_007194.3    | -2.25 | -1.17 | 8.48  | 9.64  | 7.47E-07 | 0.00000598 |
| ILMN_2131936 | ATAD3B   | NM_031921.4    | -2.28 | -1.19 | 8.43  | 9.61  | 7.5E-07  | 0.000006   |
| ILMN_1656798 | TIMM17A  | NM_006335.1    | -1.68 | -0.75 | 8.54  | 9.29  | 7.53E-07 | 0.00000602 |
| ILMN_1765500 | NDUFV3   | NM_021075.3    | -1.91 | -0.93 | 9.05  | 9.97  | 7.58E-07 | 0.00000606 |
| ILMN_1671288 | ODF2     | NM_153437.1    | -1.78 | -0.83 | 9.46  | 10.29 | 7.64E-07 | 0.0000061  |
| ILMN_1653129 | CSTF2    | NM_001325.2    | -1.53 | -0.61 | 10.64 | 11.26 | 7.67E-07 | 0.00000613 |
| ILMN_1733421 | PRKCQ    | NM_006257.2    | -1.77 | -0.82 | 10.15 | 10.98 | 7.72E-07 | 0.00000616 |
| ILMN_1762002 | CSTF3    | NM_001033505.1 | -1.55 | -0.63 | 11.46 | 12.09 | 7.72E-07 | 0.00000616 |
| ILMN_2150352 | CBWD5    | NM_001024916.2 | -1.54 | -0.62 | 10.83 | 11.45 | 7.72E-07 | 0.00000616 |
| ILMN_2143487 | TAF1B    | NM_005680.1    | -1.67 | -0.74 | 9.29  | 10.04 | 7.76E-07 | 0.00000619 |
| ILMN_1767320 | MAPK1    | NM_138957.2    | -1.69 | -0.76 | 10.5  | 11.26 | 7.81E-07 | 0.00000622 |
| ILMN_1666894 | CSPG4    | NM_001897.3    | -2.00 | -1    | 8.52  | 9.52  | 7.84E-07 | 0.00000624 |
| ILMN_1771462 | RPL36    | NM_015414.2    | -2.00 | -1    | 9.19  | 10.19 | 7.86E-07 | 0.00000625 |
| ILMN_1768273 | POP1     | NM_015029.1    | -1.82 | -0.86 | 8.89  | 9.75  | 7.87E-07 | 0.00000626 |
| ILMN_1687986 | SLC6A20  | NM_020208.2    | -1.68 | -0.75 | 7.59  | 8.34  | 7.9E-07  | 0.00000628 |
| ILMN_2041236 | GARNL4   | NM_015085.3    | -1.54 | -0.62 | 9.15  | 9.77  | 7.93E-07 | 0.00000631 |
| ILMN_1815479 | NOLA3    | NM_018648.2    | -1.53 | -0.61 | 14.01 | 14.62 | 7.98E-07 | 0.00000634 |
| ILMN_1775944 | ABI2     | XM_938458.1    | -1.56 | -0.64 | 9.97  | 10.61 | 8.1E-07  | 0.00000643 |
| ILMN_1692056 | HS3ST3A1 | NM_006042.1    | -1.78 | -0.83 | 12.27 | 13.11 | 8.12E-07 | 0.00000644 |
| ILMN_2244547 | ETNK1    | NM_001039481.1 | -2.20 | -1.14 | 7.57  | 8.71  | 8.28E-07 | 0.00000656 |
| ILMN_2227968 | NTHL1    | NM_002528.4    | -1.85 | -0.89 | 10.37 | 11.26 | 8.3E-07  | 0.00000657 |
| ILMN_1795503 | MCC      | NM_002387.1    | -2.00 | -1    | 8.79  | 9.78  | 8.38E-07 | 0.00000662 |
| ILMN_1809613 | NGEF     | NM_019850.1    | -2.39 | -1.26 | 8.44  | 9.7   | 8.41E-07 | 0.00000665 |
| ILMN_2084836 | CORO2B   | NM_006091.2    | -1.92 | -0.94 | 12.2  | 13.13 | 8.43E-07 | 0.00000666 |
| ILMN_1697736 | EXOSC2   | NM_014285.4    | -1.62 | -0.7  | 10.79 | 11.49 | 8.43E-07 | 0.00000666 |
| ILMN_1669842 | CHAF1A   | NM_005483.2    | -1.99 | -0.99 | 8.82  | 9.81  | 8.51E-07 | 0.00000672 |

Supplementary Table 2

|              |          |                |       |       |       |       |           |            |
|--------------|----------|----------------|-------|-------|-------|-------|-----------|------------|
| ILMN_2047460 | C1ORF187 | NM_198545.3    | -1.55 | -0.63 | 11.42 | 12.05 | 8.54E-07  | 0.00000674 |
| ILMN_2311826 | USP6NL   | NM_001080491.1 | -1.61 | -0.69 | 10.45 | 11.14 | 8.6E-07   | 0.00000679 |
| ILMN_1673320 | C18ORF34 | NM_198995.1    | -1.59 | -0.67 | 7.32  | 7.99  | 8.69E-07  | 0.00000685 |
| ILMN_2170515 | C9ORF32  | NM_014064.2    | -1.54 | -0.62 | 10.96 | 11.58 | 8.78E-07  | 0.00000691 |
| ILMN_1793724 | C3ORF31  | NM_138807.2    | -1.51 | -0.59 | 10.7  | 11.29 | 8.83E-07  | 0.00000694 |
| ILMN_1672650 | PKM2     | NM_002654.3    | -1.80 | -0.85 | 11.41 | 12.26 | 8.83E-07  | 0.00000694 |
| ILMN_2384241 | TGFBR2   | NM_001024847.1 | -1.60 | -0.68 | 10.82 | 11.5  | 8.87E-07  | 0.00000697 |
| ILMN_1753745 | HDDC2    | NM_016063.1    | -1.56 | -0.64 | 13.11 | 13.75 | 8.97E-07  | 0.00000703 |
| ILMN_1735719 | UNG      | NM_080911.1    | -1.88 | -0.91 | 7.85  | 8.76  | 8.98E-07  | 0.00000704 |
| ILMN_2225718 | CENPE    | NM_001813.2    | -2.53 | -1.34 | 8.23  | 9.57  | 0.0000009 | 0.00000705 |
| ILMN_2399503 | UBN1     | NM_001079514.1 | -1.67 | -0.74 | 12.02 | 12.76 | 0.0000009 | 0.00000705 |
| ILMN_1697440 | PRPF4    | NM_004697.3    | -1.49 | -0.58 | 12.41 | 12.99 | 9.03E-07  | 0.00000707 |
| ILMN_1737087 | WDR5     | NM_017588.2    | -1.80 | -0.85 | 8.21  | 9.06  | 9.17E-07  | 0.00000718 |
| ILMN_1775008 | CNAP1    | NM_014865.2    | -1.71 | -0.77 | 11.73 | 12.49 | 9.22E-07  | 0.00000721 |
| ILMN_1705689 | ADAM12   | NM_003474.3    | -2.19 | -1.13 | 8.32  | 9.45  | 9.23E-07  | 0.00000721 |
| ILMN_1796069 | CBLN2    | NM_182511.2    | -2.57 | -1.36 | 7.89  | 9.26  | 9.23E-07  | 0.00000721 |
| ILMN_2310253 | TARBP2   | NM_134324.2    | -1.61 | -0.69 | 10.31 | 11.01 | 9.25E-07  | 0.00000722 |
| ILMN_1802894 | VKORC1L1 | NM_173517.3    | -1.66 | -0.73 | 10.75 | 11.48 | 9.26E-07  | 0.00000722 |
| ILMN_1686989 | INSIG1   | NM_198336.1    | -3.10 | -1.63 | 7.73  | 9.36  | 9.33E-07  | 0.00000727 |
| ILMN_1812777 | MRPL35   | NM_145644.1    | -1.52 | -0.6  | 11.23 | 11.84 | 9.42E-07  | 0.00000734 |
| ILMN_1795976 | SFXN2    | NM_178858.3    | -1.92 | -0.94 | 7.78  | 8.72  | 9.56E-07  | 0.00000745 |
| ILMN_1806733 | COL18A1  | NM_030582.2    | -1.79 | -0.84 | 9.86  | 10.71 | 9.7E-07   | 0.00000754 |
| ILMN_1733781 | FSD1     | NM_024333.1    | -1.97 | -0.98 | 9.42  | 10.4  | 9.71E-07  | 0.00000755 |
| ILMN_1801504 | RUNX1    | NM_001754.3    | -2.50 | -1.32 | 9.61  | 10.93 | 9.75E-07  | 0.00000758 |
| ILMN_1656691 | FBXO4    | NM_012176.2    | -1.54 | -0.62 | 10.12 | 10.74 | 9.8E-07   | 0.00000762 |
| ILMN_1697710 | IL1F7    | NM_014439.3    | -1.75 | -0.81 | 7.87  | 8.68  | 9.85E-07  | 0.00000764 |
| ILMN_1795181 | FLJ20035 | NM_017631.3    | -2.38 | -1.25 | 8.77  | 10.02 | 9.86E-07  | 0.00000765 |
| ILMN_1767253 | KIAA0690 | NM_015179.2    | -1.65 | -0.72 | 9.99  | 10.71 | 9.87E-07  | 0.00000766 |
| ILMN_1745513 | MT       | NM_173467.3    | -1.58 | -0.66 | 10.03 | 10.69 | 9.93E-07  | 0.0000077  |
| ILMN_1716925 | FSIP1    | NM_152597.3    | -1.53 | -0.61 | 9.44  | 10.05 | 9.99E-07  | 0.00000774 |
| ILMN_1683747 | CD276    | XM_945867.1    | -2.08 | -1.06 | 9.99  | 11.04 | 1.02E-06  | 0.00000787 |
| ILMN_2103761 | TLE4     | NM_007005.3    | -1.77 | -0.82 | 11.16 | 11.98 | 1.02E-06  | 0.00000789 |
| ILMN_2381296 | GSTZ1    | NM_145871.1    | -1.55 | -0.63 | 9.71  | 10.34 | 1.03E-06  | 0.00000799 |
| ILMN_1675656 | PPFIBP2  | NM_003621.1    | -1.62 | -0.7  | 9.58  | 10.28 | 1.04E-06  | 0.00000804 |
| ILMN_2312304 | INTS6    | NM_001039938.1 | -1.80 | -0.85 | 8.41  | 9.25  | 1.06E-06  | 0.00000814 |
| ILMN_2338963 | SLC29A1  | NM_001078174.1 | -1.78 | -0.83 | 8.13  | 8.96  | 1.06E-06  | 0.00000817 |
| ILMN_1703092 | RECQL4   | NM_004260.1    | -2.43 | -1.28 | 8.62  | 9.91  | 1.07E-06  | 0.00000822 |
| ILMN_1805200 | DNM1     | NM_004408.2    | -2.50 | -1.32 | 8.92  | 10.24 | 1.09E-06  | 0.00000841 |
| ILMN_1750102 | EME1     | NM_152463.1    | -2.25 | -1.17 | 8.69  | 9.87  | 1.11E-06  | 0.00000851 |
| ILMN_1766793 | C9ORF23  | NM_148179.1    | -1.65 | -0.72 | 8.92  | 9.65  | 1.11E-06  | 0.00000854 |
| ILMN_1735220 | CAV2     | NM_001233.3    | -1.67 | -0.74 | 9.15  | 9.89  | 1.13E-06  | 0.00000864 |
| ILMN_1756935 | OSBPL6   | NM_145739.1    | -1.57 | -0.65 | 10.62 | 11.28 | 1.13E-06  | 0.00000869 |
| ILMN_1713636 | S100A6   | NM_014624.3    | -2.00 | -1    | 11.81 | 12.81 | 1.14E-06  | 0.0000087  |

Supplementary Table 2

|              |          |                |       |       |       |       |           |            |
|--------------|----------|----------------|-------|-------|-------|-------|-----------|------------|
| ILMN_1670542 | AK2      | NM_001625.2    | -1.61 | -0.69 | 11.28 | 11.98 | 1.15E-06  | 0.00000878 |
| ILMN_2389013 | ADRM1    | NM_175573.1    | -1.60 | -0.68 | 11.32 | 12    | 1.16E-06  | 0.00000884 |
| ILMN_1790801 | RPS6KA2  | NM_021135.4    | -2.07 | -1.05 | 8.11  | 9.16  | 1.16E-06  | 0.00000885 |
| ILMN_2367458 | UFD1L    | NM_001035247.1 | -1.65 | -0.72 | 9.18  | 9.91  | 1.17E-06  | 0.0000089  |
| ILMN_2110908 | MYC      | NM_002467.3    | -2.81 | -1.49 | 8.73  | 10.22 | 1.17E-06  | 0.00000896 |
| ILMN_1771026 | GARS     | NM_002047.1    | -1.55 | -0.63 | 13.11 | 13.74 | 0.0000012 | 0.00000915 |
| ILMN_1674402 | TMEM71   | NM_144649.1    | -1.72 | -0.78 | 7.53  | 8.31  | 1.22E-06  | 0.00000927 |
| ILMN_1653209 | ZWINT    | NM_032997.2    | -1.64 | -0.71 | 8.02  | 8.73  | 1.22E-06  | 0.00000928 |
| ILMN_1732150 | KIAA0101 | NM_014736.4    | -2.22 | -1.15 | 8.68  | 9.83  | 1.22E-06  | 0.0000093  |
| ILMN_1811851 | PRRX1    | NM_006902.3    | -1.79 | -0.84 | 8     | 8.83  | 1.22E-06  | 0.0000093  |
| ILMN_1805665 | FLRT3    | NM_013281.2    | -1.61 | -0.69 | 10.07 | 10.76 | 1.27E-06  | 0.00000957 |
| ILMN_1692271 | CCM2     | NM_031443.3    | -1.60 | -0.68 | 9.47  | 10.15 | 1.27E-06  | 0.00000957 |
| ILMN_1713603 | PRKCB1   | NM_212535.1    | -1.95 | -0.96 | 7.82  | 8.78  | 1.27E-06  | 0.00000957 |
| ILMN_2041101 | ANXA2P1  | NR_001562.1    | -2.27 | -1.18 | 10.58 | 11.76 | 1.28E-06  | 0.00000963 |
| ILMN_2345739 | C1QDC1   | NM_023925.3    | -1.64 | -0.71 | 10.31 | 11.02 | 1.29E-06  | 0.0000097  |
| ILMN_1718297 | EML4     | NM_019063.2    | -1.71 | -0.77 | 10.77 | 11.54 | 1.29E-06  | 0.0000097  |
| ILMN_1797362 | LIMK1    | NM_016735.1    | -1.77 | -0.82 | 9.01  | 9.83  | 1.29E-06  | 0.0000097  |
| ILMN_1714278 | C9ORF30  | NM_080655.1    | -1.62 | -0.7  | 10.76 | 11.46 | 0.0000013 | 0.00000976 |
| ILMN_1709483 | MRE11A   | NM_005591.3    | -1.72 | -0.78 | 9     | 9.77  | 0.0000013 | 0.00000976 |
| ILMN_1774028 | MTFR1    | NM_014637.2    | -1.57 | -0.65 | 10.63 | 11.29 | 0.0000013 | 0.0000098  |
| ILMN_2087702 | MYH9     | NM_002473.3    | -1.77 | -0.82 | 13.16 | 13.98 | 1.32E-06  | 0.00000991 |
| ILMN_1699469 | KCNIP4   | NM_147182.2    | -1.77 | -0.82 | 7.39  | 8.21  | 1.33E-06  | 0.00000996 |
| ILMN_2202930 | PCYT2    | NM_002861.1    | -1.67 | -0.74 | 8.72  | 9.46  | 1.34E-06  | 0.00001    |
| ILMN_1669323 | BACE2    | NM_012105.3    | -1.91 | -0.93 | 10.3  | 11.23 | 1.34E-06  | 0.0000101  |
| ILMN_1759184 | MGC13170 | NM_199249.1    | -1.69 | -0.76 | 11.85 | 12.61 | 1.37E-06  | 0.0000103  |
| ILMN_1794038 | FAM49A   | NM_030797.1    | -2.11 | -1.08 | 8.91  | 9.99  | 1.39E-06  | 0.0000104  |
| ILMN_1764770 | MGC15763 | NM_138381.1    | -1.69 | -0.76 | 9.37  | 10.13 | 1.41E-06  | 0.0000105  |
| ILMN_1685037 | ASL      | NM_001024943.1 | -1.71 | -0.77 | 7.48  | 8.24  | 1.42E-06  | 0.0000106  |
| ILMN_1779674 | PTPRG    | NM_002841.2    | -1.79 | -0.84 | 10.06 | 10.91 | 1.42E-06  | 0.0000106  |
| ILMN_1795429 | VCL      | NM_003373.3    | -1.54 | -0.62 | 13.66 | 14.29 | 1.43E-06  | 0.0000107  |
| ILMN_1739397 | GLMN     | NM_053274.1    | -1.74 | -0.8  | 10.37 | 11.16 | 1.44E-06  | 0.0000108  |
| ILMN_1655904 | ROR1     | NM_005012.1    | -2.36 | -1.24 | 8.27  | 9.51  | 1.45E-06  | 0.0000108  |
| ILMN_1694755 | FSD1     | NM_024333.1    | -1.91 | -0.93 | 8.79  | 9.72  | 1.47E-06  | 0.000011   |
| ILMN_2407124 | MCM8     | NM_032485.4    | -2.64 | -1.4  | 8.61  | 10.01 | 1.48E-06  | 0.000011   |
| ILMN_1813955 | SERTAD3  | NM_203344.1    | -1.79 | -0.84 | 8.9   | 9.75  | 0.0000015 | 0.0000111  |
| ILMN_1663787 | KLK3     | NM_001030050.1 | -2.77 | -1.47 | 7.79  | 9.26  | 0.0000015 | 0.0000112  |
| ILMN_2051381 | ALDH16A1 | NM_153329.2    | -2.01 | -1.01 | 8.94  | 9.95  | 1.52E-06  | 0.0000113  |
| ILMN_1782688 | THNSL1   | NM_024838.3    | -1.57 | -0.65 | 10.23 | 10.88 | 1.52E-06  | 0.0000113  |
| ILMN_1673543 | PGM2     | NM_018290.2    | -1.51 | -0.59 | 10.62 | 11.2  | 1.57E-06  | 0.0000116  |
| ILMN_1714623 | TOMM22   | NM_020243.4    | -1.51 | -0.59 | 12.08 | 12.67 | 1.58E-06  | 0.0000116  |
| ILMN_1680703 | MRPS15   | NM_031280.2    | -1.62 | -0.7  | 12.29 | 12.98 | 1.58E-06  | 0.0000117  |
| ILMN_1795524 | C15ORF44 | NM_030800.1    | -1.51 | -0.59 | 10.88 | 11.47 | 1.59E-06  | 0.0000117  |
| ILMN_1698259 | TMEM100  | NM_018286.1    | -1.69 | -0.76 | 9.03  | 9.78  | 1.59E-06  | 0.0000117  |

Supplementary Table 2

|              |           |                |       |       |       |       |           |           |
|--------------|-----------|----------------|-------|-------|-------|-------|-----------|-----------|
| ILMN_2044832 | NOL5A     | NM_006392.2    | -1.57 | -0.65 | 12.93 | 13.58 | 1.59E-06  | 0.0000117 |
| ILMN_1723971 | SLC29A1   | NM_004955.1    | -1.96 | -0.97 | 8.44  | 9.4   | 0.0000016 | 0.0000118 |
| ILMN_1718932 | MTRR      | NM_002454.1    | -2.07 | -1.05 | 9.97  | 11.02 | 0.0000016 | 0.0000118 |
| ILMN_1673757 | CASP8     | NM_033358.2    | -1.80 | -0.85 | 7.78  | 8.63  | 1.62E-06  | 0.0000119 |
| ILMN_1729611 | REEP4     | NM_025232.2    | -1.67 | -0.74 | 8.55  | 9.3   | 1.62E-06  | 0.0000119 |
| ILMN_1766112 | WHSC1     | NM_007331.1    | -1.92 | -0.94 | 8.63  | 9.57  | 1.62E-06  | 0.0000119 |
| ILMN_1728236 | FLJ10260  | NM_018042.2    | -2.04 | -1.03 | 7.66  | 8.69  | 1.63E-06  | 0.000012  |
| ILMN_1689473 | ATP6V1H   | NM_213620.1    | -1.54 | -0.62 | 8.95  | 9.57  | 1.68E-06  | 0.0000123 |
| ILMN_1748923 | SMC2L1    | NM_006444.1    | -2.39 | -1.26 | 9.35  | 10.61 | 1.71E-06  | 0.0000125 |
| ILMN_2332558 | ARL5A     | NM_001037174.1 | -1.49 | -0.58 | 11.36 | 11.94 | 1.71E-06  | 0.0000125 |
| ILMN_1715416 | NUP188    | NM_015354.1    | -1.54 | -0.62 | 10.31 | 10.93 | 1.72E-06  | 0.0000125 |
| ILMN_1684306 | S100A4    | NM_002961.2    | -1.78 | -0.83 | 8.16  | 8.99  | 1.73E-06  | 0.0000126 |
| ILMN_1800197 | MRPL36    | NM_032479.2    | -1.57 | -0.65 | 13.31 | 13.96 | 1.73E-06  | 0.0000126 |
| ILMN_2409298 | NUSAP1    | NM_018454.5    | -1.96 | -0.97 | 10.77 | 11.75 | 1.74E-06  | 0.0000127 |
| ILMN_1671209 | SYTL2     | NM_206930.1    | -2.30 | -1.2  | 9.06  | 10.26 | 1.76E-06  | 0.0000128 |
| ILMN_2109526 | CSNK2A1P  | NR_002207.1    | -1.53 | -0.61 | 10.4  | 11.01 | 1.76E-06  | 0.0000128 |
| ILMN_2108357 | RPL39L    | NM_052969.1    | -1.66 | -0.73 | 10.76 | 11.49 | 1.77E-06  | 0.0000129 |
| ILMN_1694890 | UIP1      | NM_207107.2    | -1.73 | -0.79 | 8.34  | 9.12  | 1.77E-06  | 0.0000129 |
| ILMN_1773959 | ST6GALNAC | NM_030965.1    | -1.97 | -0.98 | 10.34 | 11.32 | 1.78E-06  | 0.000013  |
| ILMN_1743753 | IFT81     | NM_031473.2    | -1.62 | -0.7  | 9.91  | 10.61 | 1.79E-06  | 0.000013  |
| ILMN_1813763 | SLC20A2   | NM_006749.3    | -1.53 | -0.61 | 11.23 | 11.85 | 0.0000018 | 0.0000131 |
| ILMN_1716089 | ANKRD25   | NM_015493.4    | -1.64 | -0.71 | 9.62  | 10.33 | 1.82E-06  | 0.0000132 |
| ILMN_1655684 | SARS2     | NM_017827.2    | -1.64 | -0.71 | 10.72 | 11.44 | 1.82E-06  | 0.0000132 |
| ILMN_2326712 | BACE2     | NM_138991.1    | -1.83 | -0.87 | 9.65  | 10.52 | 1.83E-06  | 0.0000133 |
| ILMN_1727200 | SLCO4A1   | NM_016354.3    | -1.58 | -0.66 | 7.81  | 8.47  | 1.83E-06  | 0.0000133 |
| ILMN_2210482 | MRPS34    | NM_023936.1    | -1.69 | -0.76 | 10.81 | 11.57 | 1.84E-06  | 0.0000134 |
| ILMN_2106167 | RAP1GDS1  | NM_021159.3    | -1.80 | -0.85 | 9.88  | 10.73 | 1.85E-06  | 0.0000134 |
| ILMN_1722742 | SCLY      | NM_016510.3    | -1.60 | -0.68 | 8.99  | 9.67  | 1.87E-06  | 0.0000136 |
| ILMN_2215881 | FAM7A2    | NM_001039841.1 | -1.84 | -0.88 | 8.16  | 9.04  | 1.87E-06  | 0.0000136 |
| ILMN_1807833 | HM13      | NM_030789.2    | -1.52 | -0.6  | 11.16 | 11.75 | 1.88E-06  | 0.0000136 |
| ILMN_1714515 | MRPS12    | NM_033363.1    | -1.84 | -0.88 | 10.85 | 11.73 | 1.88E-06  | 0.0000136 |
| ILMN_1756408 | PARVA     | NM_018222.2    | -1.51 | -0.59 | 9.64  | 10.23 | 1.89E-06  | 0.0000137 |
| ILMN_1741801 | CDC7      | NM_003503.2    | -1.87 | -0.9  | 9.52  | 10.42 | 0.0000019 | 0.0000137 |
| ILMN_1809866 | WDR74     | XM_936269.1    | -1.69 | -0.76 | 10.6  | 11.36 | 1.91E-06  | 0.0000138 |
| ILMN_2067709 | TFB2M     | NM_022366.1    | -1.56 | -0.64 | 10.65 | 11.3  | 1.92E-06  | 0.0000139 |
| ILMN_1796830 | UBE2L3    | NM_198157.1    | -1.79 | -0.84 | 8.15  | 8.99  | 1.92E-06  | 0.0000139 |
| ILMN_1693878 | GMPPA     | NM_205847.1    | -1.79 | -0.84 | 8.84  | 9.68  | 1.93E-06  | 0.0000139 |
| ILMN_2412384 | CCNE2     | NM_057735.1    | -1.66 | -0.73 | 11.13 | 11.87 | 1.93E-06  | 0.0000139 |
| ILMN_1772278 | TANC1     | NM_033394.1    | -1.66 | -0.73 | 11.4  | 12.13 | 1.94E-06  | 0.000014  |
| ILMN_1656248 | ASAM      | NM_024769.2    | -1.88 | -0.91 | 7.5   | 8.4   | 1.94E-06  | 0.000014  |
| ILMN_1719165 | BRMS1     | NM_015399.3    | -1.66 | -0.73 | 10.38 | 11.11 | 1.94E-06  | 0.000014  |
| ILMN_1653878 | CACNB2    | NM_201572.1    | -2.11 | -1.08 | 8.43  | 9.51  | 0.000002  | 0.0000144 |
| ILMN_1652580 | POLD1     | NM_002691.1    | -1.80 | -0.85 | 9.64  | 10.5  | 2.01E-06  | 0.0000144 |

Supplementary Table 2

|              |           |                |       |       |       |       |           |           |
|--------------|-----------|----------------|-------|-------|-------|-------|-----------|-----------|
| ILMN_2387919 | PRKAG2    | NM_001040633.1 | -1.69 | -0.76 | 8.58  | 9.34  | 2.01E-06  | 0.0000144 |
| ILMN_1711904 | MXD3      | NM_031300.2    | -1.74 | -0.8  | 9.95  | 10.76 | 2.02E-06  | 0.0000145 |
| ILMN_1716071 | PAQR3     | NM_177453.2    | -1.59 | -0.67 | 10.93 | 11.6  | 2.04E-06  | 0.0000146 |
| ILMN_1703826 | UNC5D     | NM_080872.1    | -2.33 | -1.22 | 8.6   | 9.82  | 2.05E-06  | 0.0000147 |
| ILMN_1672022 | EPHA4     | NM_004438.3    | -2.00 | -1    | 9.91  | 10.91 | 2.05E-06  | 0.0000147 |
| ILMN_2413650 | STIL      | NM_003035.2    | -2.41 | -1.27 | 9.85  | 11.11 | 2.07E-06  | 0.0000148 |
| ILMN_2370464 | TREX1     | NM_032166.2    | -1.54 | -0.62 | 10.03 | 10.65 | 2.11E-06  | 0.0000151 |
| ILMN_1785393 | ADAM12    | NM_021641.2    | -2.14 | -1.1  | 7.51  | 8.61  | 2.12E-06  | 0.0000151 |
| ILMN_2316918 | PANK1     | NM_138316.2    | -1.55 | -0.63 | 10.63 | 11.26 | 2.13E-06  | 0.0000152 |
| ILMN_1679438 | MLF1IP    | NM_024629.2    | -2.04 | -1.03 | 8.85  | 9.87  | 2.15E-06  | 0.0000153 |
| ILMN_1682857 | MIMITIN   | NM_174889.2    | -1.60 | -0.68 | 11.59 | 12.27 | 2.16E-06  | 0.0000154 |
| ILMN_1721626 | ARID5B    | NM_032199.1    | -1.54 | -0.62 | 13.01 | 13.63 | 2.18E-06  | 0.0000155 |
| ILMN_1671267 | NF2       | NM_181831.1    | -2.08 | -1.06 | 8.34  | 9.4   | 2.19E-06  | 0.0000156 |
| ILMN_2085862 | SLC15A3   | NM_016582.1    | -1.79 | -0.84 | 8.11  | 8.95  | 2.23E-06  | 0.0000158 |
| ILMN_2414325 | TNFAIP8   | NM_001077654.1 | -1.60 | -0.68 | 8.06  | 8.74  | 2.23E-06  | 0.0000158 |
| ILMN_1655924 | TRNT1     | NM_182916.1    | -1.56 | -0.64 | 9.93  | 10.57 | 2.25E-06  | 0.000016  |
| ILMN_1669617 | GRB10     | NM_005311.3    | -1.51 | -0.59 | 11.05 | 11.64 | 2.26E-06  | 0.000016  |
| ILMN_1726030 | GPX7      | NM_015696.2    | -1.49 | -0.58 | 11.16 | 11.74 | 2.28E-06  | 0.0000161 |
| ILMN_2400322 | DYRK3     | NM_003582.2    | -1.85 | -0.89 | 8.83  | 9.72  | 2.28E-06  | 0.0000161 |
| ILMN_1778238 | C17ORF40  | NM_018428.2    | -1.49 | -0.58 | 11.46 | 12.04 | 2.29E-06  | 0.0000162 |
| ILMN_1721712 | SYNGR1    | NM_145731.2    | -1.65 | -0.72 | 8.65  | 9.36  | 0.0000023 | 0.0000163 |
| ILMN_1811258 | RELB      | NM_006509.2    | -1.55 | -0.63 | 8.36  | 8.99  | 2.33E-06  | 0.0000164 |
| ILMN_1757732 | C8ORF1    | NM_004337.1    | -1.54 | -0.62 | 10.39 | 11.01 | 2.35E-06  | 0.0000166 |
| ILMN_1802951 | CDCA1     | NM_145697.1    | -2.06 | -1.04 | 8.41  | 9.45  | 2.38E-06  | 0.0000168 |
| ILMN_1806275 | LOC113179 | NM_138422.1    | -1.88 | -0.91 | 8.94  | 9.85  | 2.42E-06  | 0.0000171 |
| ILMN_1808110 | TCEB3     | NM_003198.1    | -1.66 | -0.73 | 10.36 | 11.08 | 2.46E-06  | 0.0000173 |
| ILMN_1742824 | SPATA13   | NM_153023.1    | -1.72 | -0.78 | 8.63  | 9.42  | 2.47E-06  | 0.0000173 |
| ILMN_1720889 | SC4MOL    | NM_006745.3    | -2.10 | -1.07 | 12.14 | 13.21 | 2.48E-06  | 0.0000174 |
| ILMN_2371379 | ACLY      | NM_198830.1    | -1.64 | -0.71 | 13.4  | 14.11 | 2.56E-06  | 0.0000179 |
| ILMN_1790562 | EYA3      | NM_172098.1    | -1.62 | -0.7  | 8.47  | 9.17  | 2.59E-06  | 0.0000181 |
| ILMN_1652913 | EZH2      | NM_004456.3    | -1.64 | -0.71 | 10.83 | 11.54 | 2.61E-06  | 0.0000182 |
| ILMN_1810875 | SYNGR1    | NM_145738.1    | -1.78 | -0.83 | 8.5   | 9.33  | 2.64E-06  | 0.0000184 |
| ILMN_2387090 | CGGBP1    | NM_003663.3    | -1.58 | -0.66 | 11.58 | 12.24 | 2.68E-06  | 0.0000187 |
| ILMN_2131336 | KIAA0286  | NM_015257.1    | -1.66 | -0.73 | 10.52 | 11.25 | 2.71E-06  | 0.0000189 |
| ILMN_2103720 | MRPL15    | NM_014175.2    | -1.60 | -0.68 | 10.99 | 11.67 | 2.72E-06  | 0.0000189 |
| ILMN_1670809 | NRM       | NM_007243.1    | -1.61 | -0.69 | 10.19 | 10.88 | 2.77E-06  | 0.0000192 |
| ILMN_2061452 | ORC2L     | NM_006190.3    | -1.61 | -0.69 | 10.19 | 10.88 | 2.78E-06  | 0.0000193 |
| ILMN_1691809 | PSMA1     | NM_002786.2    | -1.52 | -0.6  | 11.19 | 11.8  | 2.79E-06  | 0.0000193 |
| ILMN_1787919 | PARVB     | NM_013327.3    | -1.89 | -0.92 | 7.55  | 8.46  | 2.82E-06  | 0.0000195 |
| ILMN_1719205 | FBL       | NM_001436.2    | -1.52 | -0.6  | 12.79 | 13.39 | 2.83E-06  | 0.0000196 |
| ILMN_1811650 | DUS2L     | NM_017803.3    | -1.54 | -0.62 | 10.21 | 10.83 | 2.86E-06  | 0.0000198 |
| ILMN_1680850 | RECQL     | NM_002907.2    | -1.65 | -0.72 | 10.06 | 10.78 | 2.89E-06  | 0.0000199 |
| ILMN_1769883 | IDE       | NM_004969.1    | -2.25 | -1.17 | 9.52  | 10.69 | 2.89E-06  | 0.00002   |



Supplementary Table 2

|              |           |                |       |       |       |       |           |           |
|--------------|-----------|----------------|-------|-------|-------|-------|-----------|-----------|
| ILMN_1704656 | PPP2R1B   | NM_181699.1    | -1.92 | -0.94 | 9.62  | 10.55 | 2.93E-06  | 0.0000202 |
| ILMN_2228035 | HS3ST1    | NM_005114.2    | -1.64 | -0.71 | 8.42  | 9.14  | 2.93E-06  | 0.0000202 |
| ILMN_1792107 | ERCC8     | NM_001007234.1 | -1.56 | -0.64 | 9.52  | 10.16 | 2.95E-06  | 0.0000203 |
| ILMN_1768393 | SNRPD1    | NM_006938.2    | -1.57 | -0.65 | 10.52 | 11.16 | 2.95E-06  | 0.0000203 |
| ILMN_1691111 | MGC26885  | NM_152339.2    | -1.57 | -0.65 | 10.63 | 11.28 | 2.97E-06  | 0.0000205 |
| ILMN_1689156 | MMAB      | NM_052845.2    | -1.52 | -0.6  | 9.63  | 10.24 | 2.98E-06  | 0.0000205 |
| ILMN_2169439 | ITGAV     | NM_002210.2    | -1.65 | -0.72 | 11.87 | 12.59 | 2.99E-06  | 0.0000205 |
| ILMN_1659725 | EXOSC5    | NM_020158.3    | -1.56 | -0.64 | 10.36 | 11    | 3.09E-06  | 0.0000212 |
| ILMN_1785060 | TSPAN14   | NM_030927.1    | -1.62 | -0.7  | 10.2  | 10.91 | 3.12E-06  | 0.0000213 |
| ILMN_1765493 | SHKBP1    | NM_138392.1    | -1.59 | -0.67 | 9.09  | 9.76  | 3.15E-06  | 0.0000215 |
| ILMN_2349129 | DPP3      | NM_005700.3    | -1.62 | -0.7  | 10.95 | 11.65 | 3.16E-06  | 0.0000215 |
| ILMN_2412244 | NF2       | NM_181828.1    | -1.78 | -0.83 | 7.85  | 8.68  | 3.18E-06  | 0.0000217 |
| ILMN_1681118 | C1QDC1    | NM_023925.3    | -1.57 | -0.65 | 10.55 | 11.2  | 0.0000032 | 0.0000218 |
| ILMN_1767324 | EIF4EBP1  | NM_004095.2    | -1.65 | -0.72 | 8.71  | 9.43  | 3.26E-06  | 0.0000222 |
| ILMN_1687018 | GAS7      | NM_201432.1    | -1.65 | -0.72 | 7.5   | 8.22  | 3.28E-06  | 0.0000223 |
| ILMN_2205245 | ATPBD1B   | NM_018066.3    | -1.49 | -0.58 | 11.14 | 11.72 | 3.29E-06  | 0.0000224 |
| ILMN_2143155 | KIF11     | NM_004523.2    | -2.36 | -1.24 | 9.73  | 10.98 | 0.0000033 | 0.0000224 |
| ILMN_2277523 | DIP2A     | NM_206890.1    | -1.64 | -0.71 | 8.68  | 9.4   | 3.33E-06  | 0.0000226 |
| ILMN_2388874 | GRHL3     | NM_021180.2    | -1.72 | -0.78 | 7.8   | 8.59  | 3.33E-06  | 0.0000226 |
| ILMN_2099315 | TRPM8     | NM_024080.4    | -1.93 | -0.95 | 10.77 | 11.72 | 3.37E-06  | 0.0000229 |
| ILMN_1785252 | SLC26A6   | NM_134426.2    | -1.75 | -0.81 | 10.03 | 10.85 | 3.38E-06  | 0.000023  |
| ILMN_2383774 | TRAF3     | NM_003300.2    | -1.77 | -0.82 | 7.9   | 8.72  | 3.41E-06  | 0.0000231 |
| ILMN_1792168 | GALE      | NM_000403.3    | -1.74 | -0.8  | 10.09 | 10.89 | 3.46E-06  | 0.0000234 |
| ILMN_2194828 | C16ORF53  | NM_024516.2    | -1.57 | -0.65 | 11.52 | 12.17 | 3.46E-06  | 0.0000234 |
| ILMN_2370772 | EIF4G1    | NM_198244.1    | -1.56 | -0.64 | 11.31 | 11.95 | 3.55E-06  | 0.000024  |
| ILMN_1703718 | CCT7      | NM_006429.2    | -1.55 | -0.63 | 12.52 | 13.15 | 3.56E-06  | 0.000024  |
| ILMN_2116075 | TRUB2     | NM_015679.1    | -1.61 | -0.69 | 8.61  | 9.3   | 3.63E-06  | 0.0000245 |
| ILMN_1726104 | C11ORF51  | NM_014042.1    | -1.57 | -0.65 | 10.36 | 11.01 | 3.63E-06  | 0.0000245 |
| ILMN_1691007 | ADPN      | NM_025225.2    | -1.62 | -0.7  | 7.22  | 7.93  | 3.73E-06  | 0.0000251 |
| ILMN_2104924 | C21ORF70  | NM_058190.2    | -2.20 | -1.14 | 9.75  | 10.9  | 3.73E-06  | 0.0000251 |
| ILMN_1668035 | CRH       | NM_000756.1    | -1.99 | -0.99 | 9.6   | 10.59 | 3.75E-06  | 0.0000252 |
| ILMN_2278729 | EIF3S9    | NM_001037283.1 | -1.52 | -0.6  | 10.87 | 11.47 | 3.78E-06  | 0.0000254 |
| ILMN_1742764 | UPP1      | NM_181597.1    | -1.69 | -0.76 | 7.61  | 8.38  | 3.86E-06  | 0.0000259 |
| ILMN_1763260 | HIF1A     | NM_001530.2    | -1.89 | -0.92 | 11.1  | 12.02 | 0.0000039 | 0.0000261 |
| ILMN_1754860 | MRPS12    | NM_021107.1    | -1.91 | -0.93 | 8.89  | 9.82  | 3.95E-06  | 0.0000264 |
| ILMN_1707356 | CFL2      | NM_138638.1    | -1.65 | -0.72 | 9.31  | 10.03 | 3.95E-06  | 0.0000264 |
| ILMN_1753016 | MRPL35    | NM_016622.2    | -1.51 | -0.59 | 10.48 | 11.07 | 3.98E-06  | 0.0000266 |
| ILMN_1675448 | ZFP36L1   | NM_004926.2    | -1.84 | -0.88 | 9.66  | 10.54 | 4.02E-06  | 0.0000268 |
| ILMN_2365544 | NOLA2     | NM_001034833.1 | -1.59 | -0.67 | 12.35 | 13.02 | 4.04E-06  | 0.0000269 |
| ILMN_1721316 | TNFRSF10A | NM_003844.2    | -1.71 | -0.77 | 7.35  | 8.13  | 4.06E-06  | 0.0000271 |
| ILMN_1710216 | AVEN      | NM_020371.2    | -2.11 | -1.08 | 8.64  | 9.72  | 4.13E-06  | 0.0000275 |
| ILMN_1771149 | MRPL19    | NM_014763.2    | -1.65 | -0.72 | 9.29  | 10.01 | 4.24E-06  | 0.0000282 |
| ILMN_1738027 | BRCA1     | NM_007301.2    | -2.48 | -1.31 | 8.77  | 10.08 | 4.25E-06  | 0.0000283 |

Supplementary Table 2

|              |           |                |       |       |       |       |           |           |
|--------------|-----------|----------------|-------|-------|-------|-------|-----------|-----------|
| ILMN_1812580 | LOC150223 | NM_001017964.1 | -1.62 | -0.7  | 9.1   | 9.8   | 4.29E-06  | 0.0000285 |
| ILMN_2257607 | STARD13   | NM_178006.1    | -1.65 | -0.72 | 7.76  | 8.48  | 4.44E-06  | 0.0000294 |
| ILMN_2204876 | C14ORF58  | NM_017791.1    | -1.55 | -0.63 | 9.13  | 9.77  | 4.45E-06  | 0.0000295 |
| ILMN_1722292 | KIAA0241  | NM_015060.1    | -1.78 | -0.83 | 8.65  | 9.48  | 4.48E-06  | 0.0000296 |
| ILMN_2310295 | C21ORF58  | NM_199071.2    | -1.79 | -0.84 | 7.86  | 8.7   | 4.53E-06  | 0.0000299 |
| ILMN_1742738 | C1ORF190  | NM_001013615.1 | -1.71 | -0.77 | 8.78  | 9.55  | 0.0000046 | 0.0000304 |
| ILMN_1776861 | HAP1      | NM_003949.2    | -2.07 | -1.05 | 8.45  | 9.49  | 4.62E-06  | 0.0000305 |
| ILMN_1700413 | MAFF      | NM_012323.2    | -1.64 | -0.71 | 10.03 | 10.74 | 4.64E-06  | 0.0000306 |
| ILMN_2297626 | PEG10     | NM_001040152.1 | -2.04 | -1.03 | 10.94 | 11.98 | 4.65E-06  | 0.0000306 |
| ILMN_2103685 | DEPDC1B   | NM_018369.1    | -2.33 | -1.22 | 8.04  | 9.26  | 0.0000047 | 0.0000309 |
| ILMN_1798327 | PAQR9     | NM_198504.1    | -1.79 | -0.84 | 7.53  | 8.37  | 4.72E-06  | 0.0000311 |
| ILMN_2316778 | ETNK1     | NM_001039481.1 | -2.06 | -1.04 | 8.49  | 9.53  | 4.78E-06  | 0.0000315 |
| ILMN_2388701 | ST3GAL5   | NM_001042437.1 | -1.51 | -0.59 | 10.74 | 11.33 | 0.0000048 | 0.0000315 |
| ILMN_1730523 | MGC15416  | NM_138418.2    | -1.74 | -0.8  | 10.31 | 11.11 | 4.81E-06  | 0.0000316 |
| ILMN_1769931 | SFPQ      | NM_005066.1    | -1.77 | -0.82 | 9.01  | 9.83  | 4.89E-06  | 0.0000321 |
| ILMN_1730032 | BOK       | NM_032515.3    | -1.56 | -0.64 | 9.54  | 10.19 | 4.89E-06  | 0.0000321 |
| ILMN_1779213 | TFG       | NM_006070.4    | -1.52 | -0.6  | 10.46 | 11.06 | 0.0000049 | 0.0000321 |
| ILMN_1664111 | RFFL      | NM_001017368.1 | -1.65 | -0.72 | 7.6   | 8.32  | 0.0000051 | 0.0000333 |
| ILMN_2139125 | LRFN5     | NM_152447.2    | -2.07 | -1.05 | 9.01  | 10.06 | 5.17E-06  | 0.0000337 |
| ILMN_1667707 | SPCS3     | NM_021928.1    | -1.61 | -0.69 | 10.12 | 10.81 | 5.21E-06  | 0.0000339 |
| ILMN_1775330 | FLJ43339  | NM_207380.1    | -1.54 | -0.62 | 11.98 | 12.6  | 5.22E-06  | 0.000034  |
| ILMN_1739154 | LSAMP     | NM_002338.2    | -1.64 | -0.71 | 10.1  | 10.81 | 5.26E-06  | 0.0000342 |
| ILMN_1751289 | DERPC     | NM_017804.3    | -1.71 | -0.77 | 8.75  | 9.52  | 5.26E-06  | 0.0000342 |
| ILMN_1755862 | PFAS      | NM_012393.1    | -1.79 | -0.84 | 10.62 | 11.46 | 0.0000053 | 0.0000344 |
| ILMN_2345015 | PTGES2    | NM_198938.1    | -1.49 | -0.58 | 11.83 | 12.41 | 5.37E-06  | 0.0000349 |
| ILMN_1710406 | LOC643668 | XM_928629.1    | -1.53 | -0.61 | 14    | 14.61 | 5.38E-06  | 0.0000349 |
| ILMN_1788607 | RPL23A    | NM_000984.4    | -1.62 | -0.7  | 11.54 | 12.24 | 5.39E-06  | 0.000035  |
| ILMN_1672393 | CUL7      | NM_014780.3    | -1.52 | -0.6  | 7.97  | 8.57  | 5.41E-06  | 0.0000351 |
| ILMN_1662910 | SFXN3     | NM_030971.3    | -1.68 | -0.75 | 8.7   | 9.45  | 5.43E-06  | 0.0000352 |
| ILMN_1656521 | CGI-96    | NM_015703.3    | -1.96 | -0.97 | 9.46  | 10.43 | 5.47E-06  | 0.0000354 |
| ILMN_2414366 | HTATIP    | NM_182709.1    | -1.62 | -0.7  | 7.72  | 8.42  | 5.48E-06  | 0.0000355 |
| ILMN_1658926 | NOTCH3    | NM_000435.1    | -1.56 | -0.64 | 10.86 | 11.49 | 0.0000056 | 0.0000362 |
| ILMN_1695020 | NEK3      | NM_002498.2    | -1.64 | -0.71 | 9.62  | 10.32 | 5.82E-06  | 0.0000375 |
| ILMN_1719611 | CCT6A     | NM_001762.3    | -1.97 | -0.98 | 11.6  | 12.58 | 5.83E-06  | 0.0000376 |
| ILMN_1673711 | HSP90AB1  | NM_007355.2    | -1.52 | -0.6  | 14.19 | 14.8  | 5.84E-06  | 0.0000376 |
| ILMN_2404112 | TRDMT1    | NM_176083.2    | -1.75 | -0.81 | 8.19  | 9     | 5.87E-06  | 0.0000378 |
| ILMN_1764320 | C8ORF58   | NM_001013842.1 | -1.64 | -0.71 | 9.01  | 9.72  | 5.93E-06  | 0.0000381 |
| ILMN_1795561 | CAMK1D    | NM_020397.2    | -1.51 | -0.59 | 9.43  | 10.02 | 5.98E-06  | 0.0000384 |
| ILMN_2224444 | SNX25     | NM_031953.2    | -1.58 | -0.66 | 10.05 | 10.72 | 6.02E-06  | 0.0000386 |
| ILMN_2050617 | CCT6AP1   | NR_003110.2    | -1.69 | -0.76 | 11.56 | 12.31 | 6.03E-06  | 0.0000386 |
| ILMN_2048591 | LRRN3     | NM_018334.3    | -1.74 | -0.8  | 10.98 | 11.78 | 6.06E-06  | 0.0000388 |
| ILMN_2243697 | ZDHHC13   | NM_019028.2    | -1.51 | -0.59 | 9.02  | 9.61  | 6.08E-06  | 0.0000389 |
| ILMN_1736042 | ME1       | NM_002395.2    | -2.41 | -1.27 | 8.45  | 9.73  | 0.0000061 | 0.0000391 |

Supplementary Table 2

|              |           |                |       |       |       |       |           |           |
|--------------|-----------|----------------|-------|-------|-------|-------|-----------|-----------|
| ILMN_1696183 | HBQ1      | NM_005331.3    | -1.93 | -0.95 | 8.74  | 9.7   | 6.11E-06  | 0.0000391 |
| ILMN_1779711 | DTL       | NM_016448.1    | -2.50 | -1.32 | 9.02  | 10.34 | 6.15E-06  | 0.0000394 |
| ILMN_1656185 | FLJ20186  | NM_017702.2    | -1.49 | -0.58 | 11.14 | 11.72 | 6.19E-06  | 0.0000396 |
| ILMN_1705244 | DNAH11    | NM_003777.2    | -1.58 | -0.66 | 7.09  | 7.75  | 0.0000063 | 0.0000402 |
| ILMN_2379393 | ASL       | NM_001024943.1 | -1.87 | -0.9  | 8.6   | 9.5   | 6.33E-06  | 0.0000404 |
| ILMN_2352216 | FBXL6     | NM_024555.3    | -1.62 | -0.7  | 10    | 10.7  | 6.38E-06  | 0.0000407 |
| ILMN_1789418 | GSTT2     | NM_000854.2    | -1.83 | -0.87 | 9.39  | 10.26 | 6.39E-06  | 0.0000407 |
| ILMN_2316540 | MRPL11    | NM_016050.2    | -1.49 | -0.58 | 12.07 | 12.65 | 6.48E-06  | 0.0000413 |
| ILMN_1673548 | HSPC159   | NM_014181.1    | -1.73 | -0.79 | 9.15  | 9.94  | 6.54E-06  | 0.0000416 |
| ILMN_2340935 | WBP5      | NM_001006614.1 | -1.60 | -0.68 | 10.04 | 10.73 | 6.62E-06  | 0.000042  |
| ILMN_1674811 | OASL      | NM_003733.2    | -1.78 | -0.83 | 7.78  | 8.62  | 6.65E-06  | 0.0000422 |
| ILMN_1676864 | DDX31     | NM_138620.1    | -1.75 | -0.81 | 8.76  | 9.57  | 6.68E-06  | 0.0000424 |
| ILMN_1692790 | ITGB3BP   | NM_014288.3    | -2.10 | -1.07 | 7.4   | 8.47  | 6.84E-06  | 0.0000434 |
| ILMN_1771003 | C14ORF94  | NM_017815.1    | -1.52 | -0.6  | 10.42 | 11.02 | 6.85E-06  | 0.0000434 |
| ILMN_1655867 | HRASLS    | NM_020386.2    | -1.80 | -0.85 | 9.76  | 10.61 | 6.86E-06  | 0.0000435 |
| ILMN_1744240 | WDR67     | NM_145647.1    | -1.60 | -0.68 | 9.55  | 10.23 | 6.97E-06  | 0.000044  |
| ILMN_2131493 | VISA      | NM_020746.2    | -1.74 | -0.8  | 8.49  | 9.28  | 0.000007  | 0.0000442 |
| ILMN_2350634 | EFEMP1    | NM_001039348.1 | -1.54 | -0.62 | 14.03 | 14.65 | 7.14E-06  | 0.000045  |
| ILMN_1672741 | ITSN1     | NM_001001132.1 | -1.71 | -0.77 | 8.85  | 9.62  | 7.24E-06  | 0.0000456 |
| ILMN_1658327 | BAZ1A     | NM_013448.2    | -1.77 | -0.82 | 9.44  | 10.27 | 7.29E-06  | 0.0000458 |
| ILMN_2265654 | UBE2C     | NM_181799.1    | -1.58 | -0.66 | 8.51  | 9.17  | 7.44E-06  | 0.0000467 |
| ILMN_1779343 | SNCB      | XM_936492.1    | -2.01 | -1.01 | 7.84  | 8.85  | 7.45E-06  | 0.0000467 |
| ILMN_2273921 | RAD51L3   | NM_002878.2    | -1.69 | -0.76 | 8.01  | 8.77  | 7.54E-06  | 0.0000472 |
| ILMN_1651788 | MAP3K11   | NM_002419.3    | -1.56 | -0.64 | 9.71  | 10.34 | 7.55E-06  | 0.0000473 |
| ILMN_1700822 | DPP3      | NM_130443.1    | -1.52 | -0.6  | 10.37 | 10.97 | 7.61E-06  | 0.0000476 |
| ILMN_2205211 | LOC134997 | NR_000030.1    | -1.93 | -0.95 | 13.64 | 14.59 | 7.67E-06  | 0.0000479 |
| ILMN_1795275 | USP53     | NM_019050.1    | -1.67 | -0.74 | 7.71  | 8.45  | 7.75E-06  | 0.0000483 |
| ILMN_2114568 | GBP5      | NM_052942.2    | -1.65 | -0.72 | 7.56  | 8.28  | 7.75E-06  | 0.0000483 |
| ILMN_2252160 | UBC       | NM_021009.3    | -1.88 | -0.91 | 8.24  | 9.15  | 0.0000078 | 0.0000486 |
| ILMN_1747506 | DHX34     | NM_194428.1    | -1.54 | -0.62 | 9.64  | 10.26 | 7.87E-06  | 0.000049  |
| ILMN_1753110 | ZMYND11   | NM_212479.1    | -1.59 | -0.67 | 7.79  | 8.46  | 7.94E-06  | 0.0000494 |
| ILMN_1783629 | C10ORF93  | XM_945168.1    | -1.61 | -0.69 | 7.7   | 8.39  | 8.05E-06  | 0.0000499 |
| ILMN_1680320 | GBX2      | NM_001485.2    | -2.03 | -1.02 | 8.38  | 9.4   | 8.05E-06  | 0.0000499 |
| ILMN_1811006 | E2F8      | NM_024680.2    | -1.65 | -0.72 | 7.64  | 8.35  | 8.06E-06  | 0.00005   |
| ILMN_1758852 | ENTPD7    | NM_020354.2    | -1.84 | -0.88 | 8.61  | 9.49  | 8.15E-06  | 0.0000504 |
| ILMN_1752343 | FAM13C1   | NM_198215.2    | -1.69 | -0.76 | 8.29  | 9.05  | 8.33E-06  | 0.0000514 |
| ILMN_1774207 | ANGPT2    | NM_001147.1    | -1.74 | -0.8  | 7.76  | 8.56  | 8.46E-06  | 0.0000521 |
| ILMN_1666022 | TNFRSF10D | NM_003840.3    | -1.69 | -0.76 | 7.5   | 8.26  | 0.0000085 | 0.0000524 |
| ILMN_2072296 | CKS2      | NM_001827.1    | -1.71 | -0.77 | 12.17 | 12.94 | 0.0000085 | 0.0000524 |
| ILMN_2109708 | ECGF1     | NM_001953.2    | -2.27 | -1.18 | 9.04  | 10.22 | 8.52E-06  | 0.0000525 |
| ILMN_1658695 | NUF2      | NM_031423.3    | -2.11 | -1.08 | 7.94  | 9.02  | 8.59E-06  | 0.0000529 |
| ILMN_1684694 | ANK1      | NM_020480.2    | -2.13 | -1.09 | 8.03  | 9.11  | 8.63E-06  | 0.000053  |
| ILMN_1696187 | PYGL      | NM_002863.3    | -1.73 | -0.79 | 10.34 | 11.13 | 8.76E-06  | 0.0000538 |

Supplementary Table 2

|              |           |                |       |       |       |       |           |           |
|--------------|-----------|----------------|-------|-------|-------|-------|-----------|-----------|
| ILMN_1771738 | ARL5      | NM_012097.2    | -1.54 | -0.62 | 10.02 | 10.63 | 8.83E-06  | 0.0000542 |
| ILMN_1779428 | LOC387856 | NM_001013635.2 | -1.51 | -0.59 | 9.61  | 10.2  | 8.87E-06  | 0.0000544 |
| ILMN_1657317 | POLR2J    | NM_006234.4    | -1.71 | -0.77 | 9.44  | 10.21 | 8.89E-06  | 0.0000545 |
| ILMN_1756814 | PTPRE     | NM_006504.3    | -1.85 | -0.89 | 9.37  | 10.26 | 9.06E-06  | 0.0000555 |
| ILMN_1803728 | SLC35E4   | NM_001001479.1 | -1.96 | -0.97 | 8.43  | 9.41  | 9.19E-06  | 0.0000562 |
| ILMN_1712184 | HIST1H3C  | NM_003531.2    | -2.08 | -1.06 | 8.27  | 9.33  | 9.37E-06  | 0.0000572 |
| ILMN_1760802 | MRE11A    | NM_005590.3    | -1.80 | -0.85 | 8.69  | 9.54  | 9.51E-06  | 0.000058  |
| ILMN_1690454 | C3ORF54   | NM_203370.1    | -1.55 | -0.63 | 8.28  | 8.91  | 9.69E-06  | 0.0000589 |
| ILMN_1786036 | GPATC2    | NM_018040.1    | -1.62 | -0.7  | 9.17  | 9.87  | 9.81E-06  | 0.0000596 |
| ILMN_1697864 | CXORF38   | NM_144970.1    | -1.60 | -0.68 | 9.99  | 10.67 | 9.81E-06  | 0.0000596 |
| ILMN_1706958 | PCNA      | NM_182649.1    | -1.72 | -0.78 | 9.27  | 10.06 | 9.85E-06  | 0.0000598 |
| ILMN_2133799 | ACAT2     | NM_005891.1    | -1.91 | -0.93 | 7.36  | 8.29  | 9.91E-06  | 0.0000601 |
| ILMN_1690138 | PHF10     | NM_133325.1    | -1.49 | -0.58 | 9.64  | 10.22 | 9.93E-06  | 0.0000602 |
| ILMN_1697510 | ACSS2     | NM_018677.2    | -1.62 | -0.7  | 8.25  | 8.95  | 0.0000101 | 0.0000608 |
| ILMN_2362902 | RASSF5    | NM_182664.2    | -1.83 | -0.87 | 8.32  | 9.18  | 0.0000101 | 0.0000608 |
| ILMN_1718334 | ITPA      | NM_181493.1    | -1.66 | -0.73 | 11.54 | 12.26 | 0.0000101 | 0.0000611 |
| ILMN_1731714 | CREB5     | NM_182898.2    | -1.85 | -0.89 | 10    | 10.89 | 0.0000102 | 0.0000614 |
| ILMN_1774836 | PLOD3     | NM_001084.4    | -1.67 | -0.74 | 12.18 | 12.93 | 0.0000106 | 0.0000636 |
| ILMN_1719870 | FAM72A    | NM_207418.2    | -1.65 | -0.72 | 8     | 8.73  | 0.0000107 | 0.0000644 |
| ILMN_2135984 | MASTL     | NM_032844.1    | -1.91 | -0.93 | 8.04  | 8.98  | 0.0000108 | 0.0000646 |
| ILMN_1711886 | ALG3      | NM_001006940.1 | -1.53 | -0.61 | 10.8  | 11.41 | 0.0000109 | 0.0000654 |
| ILMN_2302075 | MSI2      | NM_138962.2    | -1.55 | -0.63 | 9.38  | 10.01 | 0.0000111 | 0.0000665 |
| ILMN_1716384 | ARL6IP2   | NM_022374.1    | -1.55 | -0.63 | 9.71  | 10.34 | 0.0000111 | 0.0000665 |
| ILMN_1763627 | TNPO1     | NM_153188.1    | -1.74 | -0.8  | 9.71  | 10.51 | 0.0000112 | 0.000067  |
| ILMN_1716895 | RPA3      | NM_002947.3    | -1.53 | -0.61 | 12.16 | 12.76 | 0.0000114 | 0.0000678 |
| ILMN_1741502 | SLC2A13   | NM_052885.1    | -1.61 | -0.69 | 7.49  | 8.18  | 0.0000115 | 0.0000688 |
| ILMN_1733107 | NOC4L     | NM_024078.1    | -1.56 | -0.64 | 9.51  | 10.15 | 0.0000117 | 0.0000695 |
| ILMN_1685109 | POLR3D    | NM_001722.2    | -1.66 | -0.73 | 9.3   | 10.03 | 0.0000117 | 0.0000699 |
| ILMN_1676423 | CCNC      | NM_005190.3    | -1.58 | -0.66 | 9.97  | 10.63 | 0.0000118 | 0.0000703 |
| ILMN_1774602 | FBLN2     | NM_001004019.1 | -1.58 | -0.66 | 8.38  | 9.04  | 0.000012  | 0.0000716 |
| ILMN_1665435 | GPR30     | NM_001505.1    | -1.61 | -0.69 | 8.1   | 8.78  | 0.0000121 | 0.0000719 |
| ILMN_1667201 | WDR51B    | NM_172240.1    | -1.77 | -0.82 | 9.29  | 10.1  | 0.0000122 | 0.0000721 |
| ILMN_1696659 | THSD1     | NM_018676.2    | -1.92 | -0.94 | 7.7   | 8.64  | 0.0000122 | 0.0000721 |
| ILMN_1789504 | PTPN9     | NM_002833.2    | -1.74 | -0.8  | 8.31  | 9.11  | 0.0000123 | 0.0000729 |
| ILMN_1674390 | PRKAR1B   | NM_002735.1    | -1.59 | -0.67 | 10.05 | 10.71 | 0.0000125 | 0.0000739 |
| ILMN_1715969 | SLC25A37  | NM_016612.1    | -1.59 | -0.67 | 9.87  | 10.54 | 0.0000125 | 0.000074  |
| ILMN_1724148 | FLJ14466  | NM_032790.2    | -1.78 | -0.83 | 9.2   | 10.03 | 0.0000126 | 0.0000744 |
| ILMN_1803956 | BOC       | NM_033254.2    | -1.96 | -0.97 | 9.67  | 10.64 | 0.0000126 | 0.0000745 |
| ILMN_2349658 | TSPO      | NM_007311.3    | -1.54 | -0.62 | 10.89 | 11.51 | 0.0000127 | 0.0000749 |
| ILMN_2377733 | CASP8     | NM_033355.3    | -1.71 | -0.77 | 7.53  | 8.3   | 0.0000128 | 0.0000752 |
| ILMN_1664516 | CENPF     | NM_016343.3    | -1.68 | -0.75 | 11.41 | 12.16 | 0.0000129 | 0.0000758 |
| ILMN_1760866 | C9ORF4    | NM_014334.1    | -1.51 | -0.59 | 9.33  | 9.92  | 0.000013  | 0.0000763 |
| ILMN_1691572 | TST       | NM_003312.4    | -1.53 | -0.61 | 12.62 | 13.24 | 0.000013  | 0.0000766 |

Supplementary Table 2

|              |           |                |       |       |       |       |           |           |
|--------------|-----------|----------------|-------|-------|-------|-------|-----------|-----------|
| ILMN_2358980 | ILK       | NM_001014794.1 | -1.72 | -0.78 | 9.68  | 10.46 | 0.0000131 | 0.0000769 |
| ILMN_1677793 | P2RX5     | NM_175081.1    | -1.80 | -0.85 | 7.1   | 7.95  | 0.0000131 | 0.0000772 |
| ILMN_1813701 | RASAL2    | NM_170692.1    | -2.10 | -1.07 | 8.65  | 9.72  | 0.0000132 | 0.0000776 |
| ILMN_2379788 | HIF1A     | NM_181054.1    | -1.93 | -0.95 | 9.08  | 10.04 | 0.0000134 | 0.0000787 |
| ILMN_1685480 | TARS      | NM_152295.3    | -1.85 | -0.89 | 11.48 | 12.37 | 0.0000137 | 0.0000798 |
| ILMN_1690371 | MRPL11    | NM_016050.2    | -1.51 | -0.59 | 11.29 | 11.88 | 0.0000137 | 0.00008   |
| ILMN_1708059 | USP13     | NM_003940.1    | -1.55 | -0.63 | 10.47 | 11.1  | 0.0000139 | 0.0000811 |
| ILMN_1740737 | DCPS      | NM_014026.3    | -1.55 | -0.63 | 10.42 | 11.06 | 0.000014  | 0.0000816 |
| ILMN_2348146 | ERCC8     | NM_000082.2    | -1.54 | -0.62 | 9.26  | 9.88  | 0.000014  | 0.0000818 |
| ILMN_1730047 | LOC650000 | XM_942166.1    | -1.65 | -0.72 | 7.13  | 7.85  | 0.0000143 | 0.000083  |
| ILMN_1777074 | DNAH9     | NM_001372.2    | -1.65 | -0.72 | 8.11  | 8.83  | 0.0000143 | 0.0000834 |
| ILMN_1710124 | CMTM8     | NM_178868.3    | -1.77 | -0.82 | 9.05  | 9.86  | 0.0000144 | 0.000084  |
| ILMN_2301725 | PDE8B     | NM_001029851.1 | -1.93 | -0.95 | 9.04  | 9.99  | 0.0000146 | 0.0000848 |
| ILMN_1659464 | NYD-SP18  | NM_032599.1    | -1.53 | -0.61 | 7.69  | 8.3   | 0.0000148 | 0.0000859 |
| ILMN_2290068 | VAV3      | NM_006113.4    | -1.56 | -0.64 | 7.93  | 8.56  | 0.0000153 | 0.0000885 |
| ILMN_2393296 | GK        | NM_203391.1    | -1.64 | -0.71 | 8.79  | 9.5   | 0.0000156 | 0.0000903 |
| ILMN_1704247 | LAMA3     | NM_000227.2    | -1.79 | -0.84 | 7.84  | 8.68  | 0.0000157 | 0.0000906 |
| ILMN_1784467 | NUP210    | NM_024923.2    | -1.66 | -0.73 | 9.04  | 9.77  | 0.0000158 | 0.000091  |
| ILMN_2345824 | PCDHGC3   | NM_002588.2    | -1.53 | -0.61 | 9.4   | 10.02 | 0.0000159 | 0.0000918 |
| ILMN_1779184 | LOC348180 | XM_939188.1    | -1.56 | -0.64 | 9.38  | 10.02 | 0.000016  | 0.0000924 |
| ILMN_1803570 | BRI3BP    | NM_080626.5    | -1.64 | -0.71 | 8.05  | 8.76  | 0.0000161 | 0.0000926 |
| ILMN_1770038 | LAMA1     | NM_005559.2    | -1.69 | -0.76 | 7.19  | 7.95  | 0.0000162 | 0.0000935 |
| ILMN_1684440 | PXN       | NM_002859.1    | -1.83 | -0.87 | 8.68  | 9.55  | 0.0000164 | 0.0000941 |
| ILMN_1710727 | GSH2      | NM_133267.1    | -1.60 | -0.68 | 7.99  | 8.67  | 0.0000164 | 0.0000944 |
| ILMN_1680682 | TADA2L    | NM_133439.2    | -1.52 | -0.6  | 8.21  | 8.81  | 0.0000165 | 0.0000948 |
| ILMN_1670506 | AMMECR1   | NM_015365.2    | -1.65 | -0.72 | 7.34  | 8.06  | 0.000017  | 0.0000975 |
| ILMN_2311089 | BRCA1     | NM_007304.2    | -2.30 | -1.2  | 8.58  | 9.78  | 0.0000172 | 0.0000987 |
| ILMN_1813314 | H2BFS     | NM_017445.1    | -1.75 | -0.81 | 10.61 | 11.42 | 0.0000173 | 0.0000989 |
| ILMN_1763162 | DPH2      | NM_001384.3    | -1.68 | -0.75 | 8.69  | 9.44  | 0.0000173 | 0.0000992 |
| ILMN_1678054 | TRIM21    | NM_003141.3    | -1.53 | -0.61 | 8.97  | 9.58  | 0.0000173 | 0.0000992 |
| ILMN_2375386 | RNPS1     | NM_080594.1    | -1.51 | -0.59 | 9.82  | 10.41 | 0.0000175 | 0.0000999 |
| ILMN_1694100 | PRIM2A    | NM_000947.2    | -1.57 | -0.65 | 7.39  | 8.04  | 0.0000178 | 0.0001    |
| ILMN_1732750 | CHCHD8    | NM_016565.2    | -1.51 | -0.59 | 10.44 | 11.04 | 0.0000181 | 0.0001    |
| ILMN_2096784 | TFAP2C    | NM_003222.3    | -1.52 | -0.6  | 7.32  | 7.91  | 0.0000181 | 0.0001    |
| ILMN_1701441 | EDG2      | NM_001401.3    | -1.68 | -0.75 | 7.53  | 8.27  | 0.0000182 | 0.0001    |
| ILMN_1720498 | LOC144404 | XM_084852.11   | -1.55 | -0.63 | 8.14  | 8.77  | 0.0000183 | 0.0001    |
| ILMN_1701195 | PLA2G7    | NM_005084.2    | -1.82 | -0.86 | 7.51  | 8.38  | 0.0000184 | 0.0001    |
| ILMN_2119421 | LOC143543 | NR_002197.1    | -1.62 | -0.7  | 8.59  | 9.29  | 0.0000186 | 0.00011   |
| ILMN_1671250 | LOC649708 | XM_938776.1    | -1.54 | -0.62 | 10.14 | 10.75 | 0.0000194 | 0.00011   |
| ILMN_1727156 | ARSI      | NM_001012301.1 | -1.79 | -0.84 | 8.09  | 8.93  | 0.0000194 | 0.00011   |
| ILMN_2411559 | PUS1      | NM_001002019.1 | -2.08 | -1.06 | 8.87  | 9.94  | 0.0000194 | 0.00011   |
| ILMN_1681160 | LOC441244 | XM_943658.1    | -1.64 | -0.71 | 7.33  | 8.05  | 0.0000195 | 0.00011   |
| ILMN_2061405 | NUP54     | NM_017426.2    | -1.73 | -0.79 | 10.86 | 11.64 | 0.0000197 | 0.00011   |

Supplementary Table 2

|              |           |                |       |       |       |       |           |         |
|--------------|-----------|----------------|-------|-------|-------|-------|-----------|---------|
| ILMN_1690733 | EGF       | NM_001963.2    | -1.58 | -0.66 | 7.9   | 8.55  | 0.00002   | 0.00011 |
| ILMN_1808861 | LOC653803 | XM_376278.3    | -1.73 | -0.79 | 8.51  | 9.3   | 0.00002   | 0.00011 |
| ILMN_1654074 | ITGA3     | NM_002204.1    | -1.55 | -0.63 | 7.95  | 8.58  | 0.0000205 | 0.00012 |
| ILMN_2350607 | C20ORF7   | NM_024120.3    | -1.53 | -0.61 | 9.88  | 10.5  | 0.0000206 | 0.00012 |
| ILMN_2093720 | THG1L     | NM_017872.3    | -1.56 | -0.64 | 9.26  | 9.9   | 0.0000211 | 0.00012 |
| ILMN_1812559 | SLC7A6    | NM_003983.3    | -1.79 | -0.84 | 9.09  | 9.94  | 0.0000217 | 0.00012 |
| ILMN_1815184 | ASPM      | NM_018136.2    | -2.00 | -1    | 10.02 | 11.02 | 0.0000217 | 0.00012 |
| ILMN_1732873 | IPPK      | NM_022755.4    | -1.54 | -0.62 | 8.98  | 9.6   | 0.0000219 | 0.00012 |
| ILMN_1686920 | CCDC58    | NM_001017928.2 | -1.65 | -0.72 | 9.59  | 10.31 | 0.0000219 | 0.00012 |
| ILMN_1764596 | MPST      | NM_001013436.1 | -1.51 | -0.59 | 10.96 | 11.55 | 0.0000233 | 0.00013 |
| ILMN_1732343 | KIAA0999  | NM_025164.3    | -1.55 | -0.63 | 11.39 | 12.02 | 0.0000233 | 0.00013 |
| ILMN_1802523 | HS3ST5    | NM_153612.2    | -1.67 | -0.74 | 8.13  | 8.87  | 0.0000234 | 0.00013 |
| ILMN_2234873 | NME2      | NM_001018138.1 | -1.93 | -0.95 | 9.68  | 10.63 | 0.0000241 | 0.00013 |
| ILMN_2387553 | PSMA3     | NM_152132.1    | -1.51 | -0.59 | 11.99 | 12.59 | 0.0000246 | 0.00014 |
| ILMN_2369756 | CCDC46    | NM_145036.2    | -1.59 | -0.67 | 8.95  | 9.62  | 0.0000247 | 0.00014 |
| ILMN_1733419 | CCNE1     | NM_001238.1    | -1.61 | -0.69 | 7.47  | 8.16  | 0.0000248 | 0.00014 |
| ILMN_2276431 | DPH2      | NM_001384.4    | -1.79 | -0.84 | 7.93  | 8.77  | 0.0000249 | 0.00014 |
| ILMN_1767393 | GRIA3     | NM_181894.1    | -1.65 | -0.72 | 9.11  | 9.83  | 0.0000249 | 0.00014 |
| ILMN_1761411 | C10ORF119 | NM_024834.1    | -1.66 | -0.73 | 8.65  | 9.38  | 0.0000252 | 0.00014 |
| ILMN_2292963 | UBE2D3    | NM_181892.1    | -1.54 | -0.62 | 7.74  | 8.36  | 0.0000257 | 0.00014 |
| ILMN_2233099 | SSRP1     | NM_003146.2    | -1.52 | -0.6  | 10.36 | 10.95 | 0.0000257 | 0.00014 |
| ILMN_1710979 | ANKRD39   | NM_016466.4    | -1.54 | -0.62 | 10.16 | 10.78 | 0.0000259 | 0.00014 |
| ILMN_1663447 | HNRPA1    | NM_002136.1    | -1.51 | -0.59 | 11.14 | 11.73 | 0.0000262 | 0.00014 |
| ILMN_1721247 | K6HF      | NM_004693.1    | -1.55 | -0.63 | 7.21  | 7.84  | 0.0000268 | 0.00015 |
| ILMN_1797301 | C1ORF183  | NM_019099.3    | -1.69 | -0.76 | 9.17  | 9.93  | 0.0000269 | 0.00015 |
| ILMN_1668012 | SLC25A13  | NM_014251.1    | -1.73 | -0.79 | 10.32 | 11.11 | 0.0000277 | 0.00015 |
| ILMN_2181060 | CKAP2     | NM_018204.2    | -1.91 | -0.93 | 9.42  | 10.34 | 0.0000277 | 0.00015 |
| ILMN_2219199 | FAM84A    | NM_145175.1    | -1.73 | -0.79 | 8.57  | 9.36  | 0.0000285 | 0.00016 |
| ILMN_1786658 | BOLA3     | NM_212552.1    | -1.64 | -0.71 | 12.67 | 13.38 | 0.0000289 | 0.00016 |
| ILMN_1707634 | MGC61571  | NM_182523.1    | -1.61 | -0.69 | 10.24 | 10.93 | 0.0000294 | 0.00016 |
| ILMN_1791796 | MMP16     | NM_022564.1    | -1.59 | -0.67 | 7.17  | 7.84  | 0.0000294 | 0.00016 |
| ILMN_1743619 | NEDD9     | NM_182966.1    | -1.66 | -0.73 | 8.54  | 9.27  | 0.00003   | 0.00016 |
| ILMN_1784294 | CPA4      | NM_016352.2    | -1.69 | -0.76 | 8.83  | 9.59  | 0.0000301 | 0.00016 |
| ILMN_2319913 | DGKA      | NM_201554.1    | -1.66 | -0.73 | 9.54  | 10.28 | 0.0000303 | 0.00016 |
| ILMN_1675428 | PCDHGC3   | NM_032402.1    | -1.57 | -0.65 | 8.57  | 9.22  | 0.0000304 | 0.00017 |
| ILMN_2328378 | OSBPL3    | NM_145322.1    | -1.87 | -0.9  | 9.29  | 10.18 | 0.0000316 | 0.00017 |
| ILMN_2343010 | BOLA3     | NM_212552.2    | -1.62 | -0.7  | 12.67 | 13.37 | 0.0000317 | 0.00017 |
| ILMN_1680727 | GLRX2     | NM_016066.3    | -2.13 | -1.09 | 8.68  | 9.77  | 0.000032  | 0.00017 |
| ILMN_2346769 | C1ORF2    | NM_198264.1    | -1.71 | -0.77 | 8.29  | 9.06  | 0.000032  | 0.00017 |
| ILMN_1663425 | MED12L    | NM_053002.2    | -1.58 | -0.66 | 7.46  | 8.12  | 0.0000322 | 0.00017 |
| ILMN_1728199 | POLE      | NM_006231.2    | -1.99 | -0.99 | 9     | 9.99  | 0.0000323 | 0.00017 |
| ILMN_1722502 | CCT6A     | NM_001009186.1 | -1.59 | -0.67 | 11.89 | 12.57 | 0.0000328 | 0.00018 |
| ILMN_1763972 | TJP2      | NM_004817.2    | -1.62 | -0.7  | 7.31  | 8.01  | 0.0000333 | 0.00018 |

Supplementary Table 2

|              |            |                |       |       |       |       |           |         |
|--------------|------------|----------------|-------|-------|-------|-------|-----------|---------|
| ILMN_1714600 | NAV3       | NM_014903.3    | -1.67 | -0.74 | 9.98  | 10.72 | 0.0000333 | 0.00018 |
| ILMN_1717063 | FBXO9      | NM_033480.1    | -1.71 | -0.77 | 9.55  | 10.32 | 0.0000334 | 0.00018 |
| ILMN_1775931 | EPHA3      | NM_005233.3    | -1.64 | -0.71 | 9.62  | 10.33 | 0.0000336 | 0.00018 |
| ILMN_1665428 | GSDMDC1    | NM_024736.4    | -1.51 | -0.59 | 8.04  | 8.63  | 0.0000344 | 0.00018 |
| ILMN_1688104 | DNMT2      | NM_176085.1    | -1.51 | -0.59 | 8.37  | 8.96  | 0.0000349 | 0.00019 |
| ILMN_2108493 | LOC144404  | NM_001080825.1 | -1.71 | -0.77 | 7.86  | 8.62  | 0.0000358 | 0.00019 |
| ILMN_2329165 | MYO1C      | NM_001080779.1 | -1.56 | -0.64 | 8.03  | 8.68  | 0.0000363 | 0.00019 |
| ILMN_1654583 | CHD1       | NM_001270.2    | -1.66 | -0.73 | 10.47 | 11.2  | 0.0000372 | 0.0002  |
| ILMN_1763537 | LCTL       | NM_207338.1    | -2.06 | -1.04 | 9.36  | 10.39 | 0.0000376 | 0.0002  |
| ILMN_1692684 | SMARCD2    | NM_003077.2    | -1.73 | -0.79 | 8.28  | 9.07  | 0.0000377 | 0.0002  |
| ILMN_1662358 | MX1        | NM_002462.2    | -1.54 | -0.62 | 9.17  | 9.79  | 0.000038  | 0.0002  |
| ILMN_2231242 | HMGB1      | NM_002128.4    | -1.73 | -0.79 | 9.11  | 9.89  | 0.0000385 | 0.0002  |
| ILMN_2280480 | TCF19      | NM_007109.2    | -1.49 | -0.58 | 8.13  | 8.71  | 0.0000387 | 0.00021 |
| ILMN_1708375 | IRF1       | NM_002198.1    | -1.58 | -0.66 | 9.97  | 10.63 | 0.0000396 | 0.00021 |
| ILMN_1791409 | ITGA7      | NM_002206.1    | -1.58 | -0.66 | 9.24  | 9.91  | 0.00004   | 0.00021 |
| ILMN_1736460 | MDM1       | NM_017440.2    | -1.49 | -0.58 | 8.83  | 9.42  | 0.0000407 | 0.00021 |
| ILMN_1803338 | URB        | NM_199511.1    | -1.62 | -0.7  | 8.84  | 9.53  | 0.0000411 | 0.00022 |
| ILMN_2155228 | CRLF3      | NM_015986.2    | -1.64 | -0.71 | 9.51  | 10.22 | 0.0000415 | 0.00022 |
| ILMN_1724941 | CDCP1      | NM_022842.3    | -1.64 | -0.71 | 7.45  | 8.16  | 0.0000416 | 0.00022 |
| ILMN_1689110 | NOB1P      | NM_014062.1    | -1.51 | -0.59 | 9.84  | 10.43 | 0.0000422 | 0.00022 |
| ILMN_1812616 | MYO1C      | NM_033375.3    | -1.60 | -0.68 | 8.66  | 9.34  | 0.0000423 | 0.00022 |
| ILMN_1748352 | CTSL2      | NM_001333.2    | -1.52 | -0.6  | 9.43  | 10.03 | 0.0000432 | 0.00023 |
| ILMN_1789991 | 4-MAR      | NM_020814.1    | -1.57 | -0.65 | 8.56  | 9.21  | 0.0000435 | 0.00023 |
| ILMN_1682747 | FANCA      | NM_001018112.1 | -1.92 | -0.94 | 7.83  | 8.77  | 0.0000436 | 0.00023 |
| ILMN_1761829 | HK1        | NM_000188.1    | -1.64 | -0.71 | 9.31  | 10.03 | 0.0000439 | 0.00023 |
| ILMN_1780315 | PUSL1      | NM_153339.1    | -1.55 | -0.63 | 9.83  | 10.46 | 0.0000463 | 0.00024 |
| ILMN_2403247 | CMTM7      | NM_181472.1    | -1.60 | -0.68 | 8.45  | 9.13  | 0.0000466 | 0.00024 |
| ILMN_1676689 | PPT2       | NM_138717.1    | -1.77 | -0.82 | 7.81  | 8.63  | 0.0000482 | 0.00025 |
| ILMN_2182647 | PINX1      | NM_017884.3    | -1.68 | -0.75 | 9.47  | 10.23 | 0.0000488 | 0.00025 |
| ILMN_1809145 | HRIHFB2122 | NM_138632.1    | -1.57 | -0.65 | 9.1   | 9.75  | 0.000049  | 0.00025 |
| ILMN_2135175 | SNORD36A   | NR_002448.1    | -1.92 | -0.94 | 7.86  | 8.8   | 0.0000498 | 0.00026 |
| ILMN_2169761 | CPNE8      | NM_153634.2    | -1.71 | -0.77 | 10.84 | 11.62 | 0.0000498 | 0.00026 |
| ILMN_1774330 | KIAA0523   | NM_015253.1    | -1.64 | -0.71 | 11.13 | 11.84 | 0.0000504 | 0.00026 |
| ILMN_1751793 | PCNXL2     | NM_024938.2    | -1.67 | -0.74 | 8.65  | 9.38  | 0.0000507 | 0.00026 |
| ILMN_2055330 | KIF26B     | NM_018012.2    | -1.89 | -0.92 | 7.94  | 8.86  | 0.0000509 | 0.00026 |
| ILMN_1747386 | GLIS3      | NM_152629.2    | -1.51 | -0.59 | 8.51  | 9.09  | 0.0000512 | 0.00026 |
| ILMN_1732336 | RFC2       | NM_002914.3    | -1.67 | -0.74 | 9.01  | 9.75  | 0.0000513 | 0.00026 |
| ILMN_1683112 | FANCC      | NM_000136.2    | -1.57 | -0.65 | 8.07  | 8.73  | 0.0000525 | 0.00027 |
| ILMN_1703803 | ADAMTS3    | NM_014243.1    | -1.99 | -0.99 | 8.94  | 9.93  | 0.0000526 | 0.00027 |
| ILMN_1696767 | C13ORF21   | NM_001010897.1 | -1.88 | -0.91 | 9.61  | 10.52 | 0.0000527 | 0.00027 |
| ILMN_1680777 | MAP2K3     | NM_145109.1    | -1.68 | -0.75 | 7.64  | 8.39  | 0.0000528 | 0.00027 |
| ILMN_1696814 | SLA/LP     | NM_016955.1    | -1.57 | -0.65 | 8.04  | 8.69  | 0.0000529 | 0.00027 |
| ILMN_1774823 | RPL34      | NM_033625.1    | -1.62 | -0.7  | 12.07 | 12.77 | 0.0000535 | 0.00027 |

Supplementary Table 2

|              |           |                |       |       |       |       |           |         |
|--------------|-----------|----------------|-------|-------|-------|-------|-----------|---------|
| ILMN_1772614 | TCF12     | NM_207040.1    | -1.60 | -0.68 | 10.01 | 10.69 | 0.0000538 | 0.00028 |
| ILMN_1653163 | ZSCAN2    | NM_001007072.1 | -1.51 | -0.59 | 8.48  | 9.07  | 0.0000541 | 0.00028 |
| ILMN_1655734 | BXDC5     | NM_025065.5    | -1.51 | -0.59 | 10.5  | 11.09 | 0.0000544 | 0.00028 |
| ILMN_1774350 | MYOZ3     | NM_133371.2    | -1.57 | -0.65 | 8.43  | 9.09  | 0.0000551 | 0.00028 |
| ILMN_1683740 | TOP1MT    | XM_944877.1    | -1.64 | -0.71 | 8.52  | 9.22  | 0.000056  | 0.00029 |
| ILMN_2412139 | CABYR     | NM_153768.1    | -1.55 | -0.63 | 8.04  | 8.67  | 0.0000566 | 0.00029 |
| ILMN_1768470 | EIF4G1    | NM_004953.2    | -1.64 | -0.71 | 11.82 | 12.53 | 0.0000571 | 0.00029 |
| ILMN_1655915 | MMP11     | NM_005940.3    | -1.61 | -0.69 | 9.15  | 9.84  | 0.0000578 | 0.00029 |
| ILMN_1711157 | NOTCH4    | NM_004557.3    | -1.77 | -0.82 | 9.05  | 9.86  | 0.0000585 | 0.0003  |
| ILMN_1690693 | CTPS2     | NM_019857.3    | -1.52 | -0.6  | 7.74  | 8.34  | 0.0000585 | 0.0003  |
| ILMN_1711894 | MYB       | NM_005375.2    | -1.52 | -0.6  | 9.71  | 10.31 | 0.0000586 | 0.0003  |
| ILMN_1697703 | GLOXD1    | NM_032756.2    | -1.62 | -0.7  | 7.31  | 8.01  | 0.0000596 | 0.0003  |
| ILMN_1654685 | MCTP1     | NM_001002796.1 | -1.59 | -0.67 | 8.38  | 9.04  | 0.0000605 | 0.00031 |
| ILMN_2111932 | SERINC2   | NM_178865.3    | -1.59 | -0.67 | 7.62  | 8.3   | 0.0000621 | 0.00031 |
| ILMN_1691080 | OR6B1     | NM_001005281.1 | -1.82 | -0.86 | 8.48  | 9.34  | 0.0000633 | 0.00032 |
| ILMN_2330410 | EIF3S8    | NM_001037808.1 | -1.53 | -0.61 | 8.49  | 9.1   | 0.000064  | 0.00032 |
| ILMN_1667225 | PDE1C     | NM_005020.1    | -1.52 | -0.6  | 9.29  | 9.9   | 0.0000649 | 0.00033 |
| ILMN_1784005 | LOC644615 | XM_927730.1    | -1.64 | -0.71 | 11.6  | 12.31 | 0.000065  | 0.00033 |
| ILMN_1693430 | NME1-NME2 | NM_001018136.1 | -1.58 | -0.66 | 9.78  | 10.44 | 0.000066  | 0.00033 |
| ILMN_2115135 | PC-3      | NM_001044264.1 | -1.67 | -0.74 | 7.66  | 8.4   | 0.0000696 | 0.00035 |
| ILMN_2391912 | SEC14L1   | NM_003003.2    | -1.49 | -0.58 | 9.44  | 10.03 | 0.0000699 | 0.00035 |
| ILMN_2194448 | STT3B     | NM_178862.1    | -1.60 | -0.68 | 10.35 | 11.03 | 0.0000702 | 0.00035 |
| ILMN_2189605 | FAM122B   | NM_145284.3    | -1.71 | -0.77 | 9.72  | 10.5  | 0.0000707 | 0.00035 |
| ILMN_2381206 | DHODH     | NM_001025193.1 | -1.52 | -0.6  | 8.09  | 8.69  | 0.0000716 | 0.00036 |
| ILMN_2057768 | SLC35D1   | NM_015139.1    | -1.55 | -0.63 | 7.82  | 8.44  | 0.0000717 | 0.00036 |
| ILMN_1724349 | RGS3      | NM_144489.2    | -1.82 | -0.86 | 8.74  | 9.6   | 0.0000727 | 0.00036 |
| ILMN_1764927 | CDC42EP1  | NM_007061.3    | -1.57 | -0.65 | 9.67  | 10.31 | 0.0000731 | 0.00036 |
| ILMN_2276461 | MAP2      | NM_001039538.1 | -1.69 | -0.76 | 8.25  | 9.01  | 0.0000735 | 0.00036 |
| ILMN_2137084 | LIN9      | NM_173083.2    | -1.77 | -0.82 | 8.86  | 9.68  | 0.0000735 | 0.00037 |
| ILMN_1722239 | TIMM8A    | NM_004085.2    | -1.56 | -0.64 | 9.21  | 9.85  | 0.0000757 | 0.00038 |
| ILMN_1676721 | LOC653744 | XM_929370.1    | -1.51 | -0.59 | 8.51  | 9.09  | 0.0000762 | 0.00038 |
| ILMN_1763612 | KIAA1944  | NM_133448.1    | -1.55 | -0.63 | 7.46  | 8.09  | 0.0000766 | 0.00038 |
| ILMN_1730332 | CASP7     | NM_033340.2    | -1.60 | -0.68 | 7.94  | 8.62  | 0.000077  | 0.00038 |
| ILMN_2274306 | NRP2      | NM_201264.1    | -1.53 | -0.61 | 8.51  | 9.12  | 0.0000771 | 0.00038 |
| ILMN_2209515 | SNORD56   | NR_002739.1    | -1.55 | -0.63 | 8.74  | 9.37  | 0.0000788 | 0.00039 |
| ILMN_1713841 | LNX1      | NM_032622.1    | -1.93 | -0.95 | 7.82  | 8.77  | 0.000081  | 0.0004  |
| ILMN_2388955 | C1ORF183  | NM_198926.1    | -1.49 | -0.58 | 9.86  | 10.44 | 0.0000822 | 0.0004  |
| ILMN_1771482 | KIAA1324  | NM_020775.2    | -1.61 | -0.69 | 8.28  | 8.97  | 0.0000828 | 0.00041 |
| ILMN_1800611 | CEP72     | NM_018140.2    | -1.64 | -0.71 | 8.33  | 9.04  | 0.000083  | 0.00041 |
| ILMN_1705032 | SEH1L     | NM_031216.3    | -1.82 | -0.86 | 9.45  | 10.3  | 0.0000836 | 0.00041 |
| ILMN_1777139 | RBM13     | NM_032509.2    | -1.88 | -0.91 | 9.56  | 10.47 | 0.0000845 | 0.00041 |
| ILMN_1679501 | CSNK2A1   | NM_177559.2    | -1.57 | -0.65 | 8.66  | 9.31  | 0.0000854 | 0.00042 |
| ILMN_2401933 | ATP2B1    | NM_001001323.1 | -1.73 | -0.79 | 8     | 8.79  | 0.000086  | 0.00042 |



Supplementary Table 2

|              |          |                |       |       |       |       |           |         |
|--------------|----------|----------------|-------|-------|-------|-------|-----------|---------|
| ILMN_1703013 | NOC4L    | NM_024078.1    | -1.74 | -0.8  | 9.36  | 10.16 | 0.000088  | 0.00043 |
| ILMN_1765522 | PPM1G    | NM_177983.1    | -1.56 | -0.64 | 9.63  | 10.27 | 0.0000881 | 0.00043 |
| ILMN_1809543 | BDNF     | NM_170733.2    | -1.68 | -0.75 | 8.22  | 8.97  | 0.0000891 | 0.00043 |
| ILMN_1728073 | DENND1A  | NM_024820.2    | -1.58 | -0.66 | 8.13  | 8.79  | 0.0000908 | 0.00044 |
| ILMN_1755077 | HEBP2    | NM_014320.2    | -1.56 | -0.64 | 10.5  | 11.14 | 0.0000911 | 0.00044 |
| ILMN_1715437 | CASC5    | NM_170589.2    | -1.52 | -0.6  | 7.94  | 8.54  | 0.000092  | 0.00045 |
| ILMN_2276811 | METT11D1 | NM_001029991.1 | -1.55 | -0.63 | 8.64  | 9.27  | 0.0000929 | 0.00045 |
| ILMN_1715173 | RPS6KA1  | NM_001006665.1 | -1.57 | -0.65 | 8.25  | 8.9   | 0.000093  | 0.00045 |
| ILMN_1743579 | WDR4     | NM_033661.3    | -1.61 | -0.69 | 8.43  | 9.12  | 0.0000948 | 0.00046 |
| ILMN_1798952 | KDELR3   | NM_016657.1    | -1.74 | -0.8  | 7.28  | 8.08  | 0.0000968 | 0.00047 |
| ILMN_2214790 | LAMB1    | NM_002291.1    | -1.93 | -0.95 | 8.66  | 9.61  | 0.000097  | 0.00047 |
| ILMN_1756308 | APPBP1   | NM_001018159.1 | -1.61 | -0.69 | 8.22  | 8.9   | 0.0000987 | 0.00048 |
| ILMN_1694070 | LOC92689 | NM_138389.1    | -1.59 | -0.67 | 8.56  | 9.23  | 0.0000989 | 0.00048 |
| ILMN_2262177 | SULT1A3  | NM_003166.3    | -1.91 | -0.93 | 8.77  | 9.7   | 0.0001    | 0.00048 |
| ILMN_1782745 | RBL1     | NM_002895.2    | -1.65 | -0.72 | 9.12  | 9.84  | 0.0001    | 0.00049 |
| ILMN_1785699 | PTHLH    | NM_198966.1    | -1.72 | -0.78 | 8.85  | 9.63  | 0.0001    | 0.00049 |
| ILMN_1673966 | POLR3F   | NM_006466.2    | -1.51 | -0.59 | 9.55  | 10.14 | 0.0001    | 0.00049 |
| ILMN_1719392 | FH       | NM_000143.2    | -1.51 | -0.59 | 11.97 | 12.56 | 0.0001    | 0.0005  |
| ILMN_2329735 | ECM1     | NM_022664.1    | -1.77 | -0.82 | 8.05  | 8.87  | 0.0001    | 0.0005  |
| ILMN_2325394 | MSH5     | NM_172166.2    | -2.01 | -1.01 | 8.17  | 9.18  | 0.0001    | 0.0005  |
| ILMN_1794011 | CHST2    | NM_004267.3    | -1.84 | -0.88 | 8.55  | 9.43  | 0.00011   | 0.00051 |
| ILMN_1808777 | EHD2     | NM_014601.2    | -1.52 | -0.6  | 9.12  | 9.72  | 0.00011   | 0.00051 |
| ILMN_1662961 | GRHL3    | NM_198173.1    | -1.59 | -0.67 | 6.95  | 7.62  | 0.00011   | 0.00052 |
| ILMN_1654942 | NFIC     | NM_005597.2    | -1.59 | -0.67 | 8.04  | 8.72  | 0.00011   | 0.00053 |
| ILMN_1736112 | ARHGAP10 | NM_024605.3    | -1.53 | -0.61 | 8.84  | 9.46  | 0.00011   | 0.00053 |
| ILMN_1734827 | MKI67    | NM_002417.2    | -1.57 | -0.65 | 8.28  | 8.94  | 0.00011   | 0.00054 |
| ILMN_1735798 | OSBPL3   | NM_145320.1    | -1.55 | -0.63 | 8.63  | 9.26  | 0.00011   | 0.00054 |
| ILMN_1781721 | DDX31    | NM_022779.7    | -1.49 | -0.58 | 9.96  | 10.54 | 0.00011   | 0.00054 |
| ILMN_1715532 | AKAP12   | NM_005100.2    | -1.67 | -0.74 | 9.46  | 10.2  | 0.00012   | 0.00055 |
| ILMN_2332553 | MSRB3    | NM_198080.2    | -1.56 | -0.64 | 8.85  | 9.49  | 0.00012   | 0.00055 |
| ILMN_1770822 | RPS6KA3  | XM_944112.1    | -1.62 | -0.7  | 8.09  | 8.79  | 0.00012   | 0.00056 |
| ILMN_1728677 | CREB5    | NM_001011666.1 | -1.67 | -0.74 | 8.67  | 9.41  | 0.00012   | 0.00056 |
| ILMN_2293374 | TOP1MT   | NM_052963.1    | -1.66 | -0.73 | 8.65  | 9.39  | 0.00012   | 0.00056 |
| ILMN_1698646 | TUBG1    | XM_944510.1    | -1.84 | -0.88 | 8.33  | 9.21  | 0.00012   | 0.00056 |
| ILMN_1687335 | FLNA     | NM_001456.1    | -1.56 | -0.64 | 8.87  | 9.5   | 0.00012   | 0.00057 |
| ILMN_1688299 | DSCR1L2  | NM_013441.2    | -1.64 | -0.71 | 7.63  | 8.34  | 0.00012   | 0.00057 |
| ILMN_2394161 | ST8SIA4  | NM_175052.1    | -1.52 | -0.6  | 7.62  | 8.22  | 0.00012   | 0.00057 |
| ILMN_2148150 | CHAC2    | NM_001008708.1 | -1.88 | -0.91 | 7.82  | 8.73  | 0.00012   | 0.00058 |
| ILMN_1801302 | SCN1B    | NM_199037.2    | -1.62 | -0.7  | 8.03  | 8.73  | 0.00013   | 0.0006  |
| ILMN_1658271 | LSS      | NM_001001438.1 | -1.58 | -0.66 | 9.18  | 9.84  | 0.00013   | 0.0006  |
| ILMN_2404850 | RPL14    | NM_001034996.1 | -1.59 | -0.67 | 8.81  | 9.48  | 0.00013   | 0.00061 |
| ILMN_1753063 | KIF15    | NM_020242.1    | -1.64 | -0.71 | 9.67  | 10.38 | 0.00013   | 0.00061 |
| ILMN_2169089 | C18ORF54 | NM_173529.3    | -1.65 | -0.72 | 9.37  | 10.09 | 0.00013   | 0.00061 |

Supplementary Table 2

|              |           |                |       |       |       |       |         |         |
|--------------|-----------|----------------|-------|-------|-------|-------|---------|---------|
| ILMN_2378696 | GFM2      | NM_170681.1    | -1.51 | -0.59 | 8.66  | 9.25  | 0.00013 | 0.00061 |
| ILMN_1710170 | PPAP2C    | NM_177543.1    | -1.62 | -0.7  | 8.32  | 9.02  | 0.00013 | 0.00061 |
| ILMN_1782076 | EPHA3     | NM_182644.1    | -1.56 | -0.64 | 7.89  | 8.52  | 0.00013 | 0.00062 |
| ILMN_1756705 | CHTF18    | NM_022092.1    | -1.80 | -0.85 | 9.06  | 9.91  | 0.00013 | 0.00063 |
| ILMN_2337880 | NRG2      | NM_013983.1    | -1.51 | -0.59 | 7.83  | 8.42  | 0.00014 | 0.00063 |
| ILMN_1696066 | CARS      | NM_001751.4    | -1.52 | -0.6  | 9.06  | 9.66  | 0.00014 | 0.00063 |
| ILMN_1736127 | KIAA0773  | NM_014690.2    | -1.61 | -0.69 | 9.58  | 10.26 | 0.00014 | 0.00063 |
| ILMN_2151012 | GALR1     | NM_001480.2    | -1.62 | -0.7  | 7.45  | 8.16  | 0.00014 | 0.00063 |
| ILMN_1713058 | PSTPIP2   | NM_024430.2    | -1.74 | -0.8  | 8.44  | 9.24  | 0.00014 | 0.00064 |
| ILMN_1809883 | FLJ22349  | NM_024821.2    | -1.56 | -0.64 | 8.6   | 9.24  | 0.00014 | 0.00066 |
| ILMN_2226415 | LOC440145 | NM_001071775.1 | -1.75 | -0.81 | 9.39  | 10.2  | 0.00014 | 0.00066 |
| ILMN_1712513 | DDX11     | NM_004399.1    | -1.51 | -0.59 | 7.57  | 8.15  | 0.00015 | 0.00067 |
| ILMN_1765085 | CGI-09    | NM_015939.3    | -1.55 | -0.63 | 7.87  | 8.49  | 0.00015 | 0.00068 |
| ILMN_1675377 | ZSCAN2    | NM_017894.4    | -1.58 | -0.66 | 8.38  | 9.03  | 0.00015 | 0.00068 |
| ILMN_2274180 | MKKS      | NM_170784.1    | -1.53 | -0.61 | 9.51  | 10.13 | 0.00015 | 0.0007  |
| ILMN_1667432 | HYAL3     | NM_003549.2    | -1.49 | -0.58 | 9.06  | 9.64  | 0.00016 | 0.00072 |
| ILMN_1675053 | DMN       | NM_145728.1    | -1.61 | -0.69 | 8.36  | 9.05  | 0.00016 | 0.00072 |
| ILMN_2415536 | SIPA1     | NM_153253.28   | -1.79 | -0.84 | 8.17  | 9     | 0.00016 | 0.00072 |
| ILMN_1712545 | S100A3    | NM_002960.1    | -1.72 | -0.78 | 7.78  | 8.56  | 0.00016 | 0.00074 |
| ILMN_1789990 | ARFGEF2   | NM_006420.1    | -1.51 | -0.59 | 8.53  | 9.12  | 0.00016 | 0.00075 |
| ILMN_2396292 | ZNF655    | NM_024061.3    | -1.52 | -0.6  | 8.5   | 9.09  | 0.00016 | 0.00075 |
| ILMN_2351029 | MTMR2     | NM_016156.3    | -1.80 | -0.85 | 8.62  | 9.47  | 0.00017 | 0.00076 |
| ILMN_2374383 | TSPAN17   | NM_130465.3    | -1.64 | -0.71 | 10.13 | 10.84 | 0.00017 | 0.00077 |
| ILMN_1804568 | HOMER1    | NM_004272.3    | -1.69 | -0.76 | 7.77  | 8.54  | 0.00017 | 0.00078 |
| ILMN_1676725 | LOC653098 | XM_925981.1    | -1.73 | -0.79 | 8.69  | 9.48  | 0.00018 | 0.0008  |
| ILMN_2218780 | PPM2C     | NM_018444.2    | -2.11 | -1.08 | 8.13  | 9.21  | 0.00018 | 0.00081 |
| ILMN_1694177 | PCNA      | NM_182649.1    | -1.71 | -0.77 | 11.87 | 12.64 | 0.00018 | 0.00082 |
| ILMN_1683716 | THSD1P    | XR_000915.1    | -1.54 | -0.62 | 7.87  | 8.49  | 0.00018 | 0.00082 |
| ILMN_1768394 | ARPC5     | NM_005717.2    | -1.56 | -0.64 | 12.47 | 13.1  | 0.00018 | 0.00083 |
| ILMN_1677693 | GPR109B   | NM_006018.1    | -1.55 | -0.63 | 7.28  | 7.91  | 0.00018 | 0.00083 |
| ILMN_1726704 | RSC1A1    | NM_006511.1    | -1.68 | -0.75 | 8.8   | 9.56  | 0.00019 | 0.00084 |
| ILMN_1683598 | ACSL4     | NM_004458.1    | -1.85 | -0.89 | 9.62  | 10.51 | 0.00019 | 0.00084 |
| ILMN_1716465 | RBP7      | NM_052960.1    | -1.73 | -0.79 | 7.82  | 8.62  | 0.00019 | 0.00086 |
| ILMN_1734814 | HSPA4     | NM_002154.3    | -1.78 | -0.83 | 9.07  | 9.9   | 0.00019 | 0.00086 |
| ILMN_1712430 | ATP5G1    | NM_005175.2    | -1.57 | -0.65 | 8.63  | 9.28  | 0.0002  | 0.00089 |
| ILMN_2279182 | LOC57228  | NM_001031628.1 | -1.51 | -0.59 | 7.32  | 7.91  | 0.0002  | 0.0009  |
| ILMN_1791052 | FKBPL     | NM_022110.3    | -1.60 | -0.68 | 8.81  | 9.48  | 0.0002  | 0.0009  |
| ILMN_2337058 | PORCN     | NM_022825.2    | -1.62 | -0.7  | 9.1   | 9.8   | 0.00021 | 0.00093 |
| ILMN_1714418 | FAM101B   | NM_182705.1    | -1.71 | -0.77 | 8.9   | 9.67  | 0.00021 | 0.00093 |
| ILMN_1776267 | CLN6      | NM_017882.1    | -1.54 | -0.62 | 8.48  | 9.1   | 0.00021 | 0.00093 |
| ILMN_1736176 | PLK1      | NM_005030.3    | -1.99 | -0.99 | 9.41  | 10.4  | 0.00021 | 0.00093 |
| ILMN_1688158 | CYB5R4    | NM_016230.2    | -1.49 | -0.58 | 9.47  | 10.05 | 0.00021 | 0.00095 |
| ILMN_1663347 | OTOF      | NM_194248.1    | -1.56 | -0.64 | 7.52  | 8.17  | 0.00022 | 0.00097 |

Supplementary Table 2

|              |           |                |       |       |       |       |         |         |
|--------------|-----------|----------------|-------|-------|-------|-------|---------|---------|
| ILMN_1803819 | IQGAP1    | NM_003870.3    | -1.79 | -0.84 | 10.13 | 10.97 | 0.00022 | 0.00098 |
| ILMN_2333687 | CD59      | NM_203331.1    | -1.51 | -0.59 | 8.57  | 9.16  | 0.00022 | 0.00098 |
| ILMN_1696028 | ETNK1     | NM_018638.3    | -1.74 | -0.8  | 8.82  | 9.62  | 0.00022 | 0.00099 |
| ILMN_2275110 | SPRED3    | NM_001042522.1 | -1.73 | -0.79 | 7.6   | 8.38  | 0.00022 | 0.00099 |
| ILMN_1737254 | USP1      | NM_003368.4    | -1.51 | -0.59 | 10.13 | 10.73 | 0.00023 | 0.00101 |
| ILMN_1652662 | GRB10     | NM_001001555.1 | -1.58 | -0.66 | 8.09  | 8.76  | 0.00023 | 0.00102 |
| ILMN_1769406 | PIAS2     | XM_938229.1    | -1.73 | -0.79 | 9.14  | 9.93  | 0.00024 | 0.00105 |
| ILMN_1665856 | CA10      | NM_020178.3    | -1.53 | -0.61 | 7.18  | 7.78  | 0.00024 | 0.00106 |
| ILMN_1789781 | PIM3      | NM_001001852.2 | -1.49 | -0.58 | 8.17  | 8.75  | 0.00024 | 0.00107 |
| ILMN_1723969 | PLCB1     | NM_182734.1    | -1.79 | -0.84 | 9.14  | 9.98  | 0.00025 | 0.00109 |
| ILMN_1747650 | BMP6      | NM_001718.2    | -1.59 | -0.67 | 8.53  | 9.2   | 0.00025 | 0.00109 |
| ILMN_1653834 | OGFOD1    | NM_001031707.1 | -1.69 | -0.76 | 8.28  | 9.03  | 0.00025 | 0.00109 |
| ILMN_1761910 | BDNF      | NM_001709.3    | -1.79 | -0.84 | 8.6   | 9.44  | 0.00025 | 0.00109 |
| ILMN_2057408 | LOC388503 | NM_001013640.1 | -1.52 | -0.6  | 7.84  | 8.44  | 0.00025 | 0.00109 |
| ILMN_1722809 | NRCAM     | NM_005010.2    | -1.51 | -0.59 | 12.19 | 12.78 | 0.00025 | 0.0011  |
| ILMN_1736527 | TFCP2L1   | NM_014553.1    | -1.52 | -0.6  | 7.33  | 7.93  | 0.00025 | 0.00111 |
| ILMN_1783131 | SAMD13    | NM_001010971.1 | -1.67 | -0.74 | 8.32  | 9.06  | 0.00026 | 0.00112 |
| ILMN_1737396 | PSMD14    | NM_005805.2    | -1.51 | -0.59 | 12.02 | 12.61 | 0.00026 | 0.00113 |
| ILMN_1771058 | VAX1      | NM_199131.1    | -1.62 | -0.7  | 8.08  | 8.77  | 0.00026 | 0.00113 |
| ILMN_1688722 | IL13RA2   | NM_000640.2    | -1.64 | -0.71 | 9.08  | 9.79  | 0.00026 | 0.00115 |
| ILMN_2201596 | CYTL1     | NM_018659.2    | -1.60 | -0.68 | 8.46  | 9.14  | 0.00026 | 0.00115 |
| ILMN_2161820 | GLYATL2   | NM_145016.2    | -1.52 | -0.6  | 7.43  | 8.03  | 0.00027 | 0.00115 |
| ILMN_1698715 | NHLRC2    | NM_198514.2    | -1.56 | -0.64 | 8.72  | 9.35  | 0.00027 | 0.00116 |
| ILMN_2096012 | UHMK1     | NM_175866.2    | -1.54 | -0.62 | 9.11  | 9.74  | 0.00028 | 0.00121 |
| ILMN_1711381 | RFC3      | NM_181558.1    | -1.67 | -0.74 | 7.62  | 8.36  | 0.00028 | 0.00122 |
| ILMN_2161508 | PHTF2     | NM_020432.2    | -1.51 | -0.59 | 8.51  | 9.1   | 0.00029 | 0.00123 |
| ILMN_1794560 | TMEM93    | NM_001014764.1 | -1.52 | -0.6  | 10.05 | 10.65 | 0.00029 | 0.00126 |
| ILMN_1670769 | C6ORF139  | NM_018132.3    | -1.58 | -0.66 | 9.19  | 9.86  | 0.00029 | 0.00126 |
| ILMN_1664679 | IGSF4D    | NM_153184.2    | -1.60 | -0.68 | 9.61  | 10.29 | 0.0003  | 0.00127 |
| ILMN_1796627 | PKIG      | NM_181805.1    | -1.59 | -0.67 | 8.06  | 8.73  | 0.0003  | 0.00129 |
| ILMN_2344662 | HMGA2     | NM_003483.4    | -1.67 | -0.74 | 7.94  | 8.67  | 0.0003  | 0.00129 |
| ILMN_1743784 | SHMT1     | NM_004169.3    | -1.58 | -0.66 | 9.35  | 10.01 | 0.00031 | 0.00134 |
| ILMN_1724826 | DNM1L     | NM_005690.2    | -1.56 | -0.64 | 9.9   | 10.55 | 0.00032 | 0.00136 |
| ILMN_2057399 | ZBTB8OS   | NM_178547.2    | -1.61 | -0.69 | 9.31  | 10    | 0.00033 | 0.00138 |
| ILMN_1777156 | GTPBP3    | NM_133644.1    | -1.68 | -0.75 | 9.01  | 9.76  | 0.00034 | 0.00143 |
| ILMN_1787190 | NRP2      | NM_201264.1    | -1.55 | -0.63 | 8.23  | 8.86  | 0.00034 | 0.00144 |
| ILMN_1703441 | ZNF593    | NM_015871.2    | -1.52 | -0.6  | 11.1  | 11.7  | 0.00035 | 0.00147 |
| ILMN_1708006 | MICB      | NM_005931.2    | -1.71 | -0.77 | 7.55  | 8.32  | 0.00035 | 0.00147 |
| ILMN_1804283 | GNAS      | NM_016592.1    | -1.55 | -0.63 | 8.59  | 9.22  | 0.00035 | 0.00149 |
| ILMN_1754795 | FAT       | NM_005245.3    | -1.74 | -0.8  | 11.15 | 11.96 | 0.00037 | 0.00155 |
| ILMN_1729767 | TARBP2    | NM_134323.1    | -1.51 | -0.59 | 10.79 | 11.38 | 0.00037 | 0.00156 |
| ILMN_1805371 | HNRPM     | NM_005968.2    | -1.52 | -0.6  | 10.04 | 10.64 | 0.00037 | 0.00156 |
| ILMN_2404454 | NLE1      | NM_018096.3    | -1.56 | -0.64 | 8.26  | 8.9   | 0.00038 | 0.00159 |

Supplementary Table 2

|              |           |                |       |       |       |       |         |         |
|--------------|-----------|----------------|-------|-------|-------|-------|---------|---------|
| ILMN_1673073 | WDR62     | NM_173636.3    | -1.62 | -0.7  | 8.06  | 8.76  | 0.00038 | 0.00159 |
| ILMN_2415583 | HS6ST2    | NM_001077188.1 | -1.72 | -0.78 | 8.01  | 8.79  | 0.00039 | 0.00163 |
| ILMN_1808163 | C11ORF24  | NM_022338.2    | -1.52 | -0.6  | 10.01 | 10.61 | 0.00039 | 0.00163 |
| ILMN_1804207 | MRPL4     | NM_015956.2    | -1.66 | -0.73 | 8.99  | 9.71  | 0.0004  | 0.00164 |
| ILMN_1764175 | GPD1      | NM_005276.2    | -1.68 | -0.75 | 9.66  | 10.41 | 0.0004  | 0.00166 |
| ILMN_2281486 | CNGA3     | NM_001298.1    | -1.72 | -0.78 | 8.51  | 9.29  | 0.00041 | 0.0017  |
| ILMN_1658407 | SLC43A3   | NM_199329.1    | -1.54 | -0.62 | 7.8   | 8.42  | 0.00044 | 0.00181 |
| ILMN_1769071 | XKRX      | NM_212559.1    | -1.54 | -0.62 | 7.63  | 8.25  | 0.00045 | 0.00183 |
| ILMN_1740523 | KTN1      | NM_182926.1    | -1.55 | -0.63 | 8.68  | 9.32  | 0.00047 | 0.0019  |
| ILMN_2047354 | C1ORF97   | NM_032705.3    | -1.53 | -0.61 | 9.67  | 10.28 | 0.00049 | 0.00197 |
| ILMN_1688094 | ORC5L     | NM_002553.2    | -1.59 | -0.67 | 7.81  | 8.48  | 0.00049 | 0.00197 |
| ILMN_2179083 | LOXL4     | NM_032211.6    | -1.57 | -0.65 | 9.74  | 10.39 | 0.00049 | 0.00198 |
| ILMN_1798619 | KCTD17    | NM_024681.1    | -1.54 | -0.62 | 8.76  | 9.38  | 0.00049 | 0.00198 |
| ILMN_2366998 | CTF8      | NM_001040144.1 | -1.57 | -0.65 | 9.06  | 9.71  | 0.00051 | 0.00204 |
| ILMN_2091590 | ANKRD41   | NM_152363.2    | -1.55 | -0.63 | 8.41  | 9.03  | 0.00052 | 0.00211 |
| ILMN_1769201 | ELF3      | NM_004433.3    | -1.65 | -0.72 | 8.94  | 9.65  | 0.00053 | 0.00211 |
| ILMN_1738767 | PLP2      | NM_002668.1    | -1.56 | -0.64 | 8.79  | 9.43  | 0.00055 | 0.0022  |
| ILMN_2387742 | LOC144983 | NM_001011724.1 | -1.57 | -0.65 | 7.88  | 8.53  | 0.00055 | 0.0022  |
| ILMN_1811515 | DLG3      | NM_021120.1    | -1.60 | -0.68 | 8.65  | 9.33  | 0.00056 | 0.00223 |
| ILMN_1664718 | CYP51A1   | NM_000786.2    | -1.62 | -0.7  | 8.87  | 9.57  | 0.0006  | 0.00239 |
| ILMN_1677736 | TMEM104   | NM_017728.2    | -1.72 | -0.78 | 8.57  | 9.34  | 0.00061 | 0.00242 |
| ILMN_1683052 | PTRH2     | NM_001015509.1 | -1.55 | -0.63 | 8.18  | 8.81  | 0.00062 | 0.00245 |
| ILMN_1761425 | OLFML2A   | NM_182487.1    | -1.57 | -0.65 | 9.44  | 10.1  | 0.00062 | 0.00246 |
| ILMN_1716651 | RUNX2     | NM_001024630.1 | -1.65 | -0.72 | 8.25  | 8.97  | 0.00071 | 0.00275 |
| ILMN_2401701 | PCGF6     | NM_032154.3    | -1.71 | -0.77 | 8.61  | 9.38  | 0.00074 | 0.00286 |
| ILMN_1698585 | SLC6A20   | NM_020208.2    | -1.56 | -0.64 | 8.17  | 8.82  | 0.00074 | 0.00286 |
| ILMN_1790962 | FLJ45909  | NM_198445.1    | -1.66 | -0.73 | 8.01  | 8.75  | 0.00074 | 0.00287 |
| ILMN_2319910 | DGKA      | NM_201554.1    | -1.51 | -0.59 | 9.12  | 9.71  | 0.00074 | 0.00288 |
| ILMN_1718331 | MMP16     | NM_005941.2    | -1.52 | -0.6  | 8.51  | 9.11  | 0.00075 | 0.00289 |
| ILMN_1735908 | UTP15     | NM_032175.2    | -1.54 | -0.62 | 9.13  | 9.75  | 0.00075 | 0.00291 |
| ILMN_2390859 | NFKB2     | NM_002502.2    | -1.51 | -0.59 | 7.97  | 8.56  | 0.00076 | 0.00293 |
| ILMN_2324561 | SLC7A6    | NM_001076785.1 | -1.85 | -0.89 | 8.16  | 9.05  | 0.00078 | 0.00299 |
| ILMN_2331010 | TNFRSF10B | NM_147187.1    | -1.59 | -0.67 | 7.94  | 8.61  | 0.00079 | 0.00304 |
| ILMN_1689086 | CTSC      | NM_148170.2    | -1.53 | -0.61 | 7.4   | 8.01  | 0.00083 | 0.00319 |
| ILMN_1661776 | CENPJ     | NM_018451.2    | -1.55 | -0.63 | 9.36  | 9.99  | 0.00084 | 0.00322 |
| ILMN_1742781 | KIRREL    | NM_018240.3    | -1.54 | -0.62 | 7.82  | 8.45  | 0.00089 | 0.00337 |
| ILMN_2386291 | WTIP      | NM_001080436.1 | -1.53 | -0.61 | 8.89  | 9.5   | 0.00089 | 0.00339 |
| ILMN_2086470 | PDGFRA    | NM_006206.3    | -1.67 | -0.74 | 12.02 | 12.76 | 0.00094 | 0.00355 |
| ILMN_2133784 | C11ORF38  | NM_212555.1    | -1.51 | -0.59 | 9.42  | 10.01 | 0.00094 | 0.00356 |
| ILMN_1717799 | PRKCE     | NM_005400.2    | -1.60 | -0.68 | 8.51  | 9.19  | 0.00095 | 0.00357 |
| ILMN_1741483 | HPS1      | NM_182639.1    | -1.55 | -0.63 | 8.74  | 9.36  | 0.00095 | 0.00358 |
| ILMN_2199676 | CEP152    | NM_014985.2    | -1.62 | -0.7  | 8.02  | 8.72  | 0.00097 | 0.00365 |
| ILMN_1685275 | MCAM      | NM_006500.2    | -1.59 | -0.67 | 7.92  | 8.59  | 0.00105 | 0.0039  |

Supplementary Table 2

|              |           |                |       |       |       |       |         |         |
|--------------|-----------|----------------|-------|-------|-------|-------|---------|---------|
| ILMN_2275248 | ECE2      | NM_014693.2    | -1.53 | -0.61 | 8.22  | 8.82  | 0.00105 | 0.00391 |
| ILMN_1731137 | TXNDC9    | NM_005783.3    | -1.60 | -0.68 | 9.34  | 10.02 | 0.00108 | 0.00401 |
| ILMN_1674629 | C9ORF3    | NM_032823.3    | -1.53 | -0.61 | 8.55  | 9.16  | 0.00112 | 0.00413 |
| ILMN_1654001 | SMC6L1    | NM_024624.3    | -1.72 | -0.78 | 8.47  | 9.25  | 0.00113 | 0.00417 |
| ILMN_2043060 | PLCH1     | NM_014996.1    | -1.66 | -0.73 | 8.51  | 9.24  | 0.00113 | 0.00417 |
| ILMN_1759628 | ATP1B3    | NM_001679.2    | -1.49 | -0.58 | 11.55 | 12.14 | 0.00116 | 0.00429 |
| ILMN_2136971 | FABP3     | NM_004102.3    | -1.60 | -0.68 | 8.03  | 8.72  | 0.00119 | 0.00436 |
| ILMN_1709479 | YAP1      | NM_006106.2    | -1.57 | -0.65 | 10.5  | 11.15 | 0.00124 | 0.00454 |
| ILMN_1701402 | IKIP      | NM_153687.2    | -1.51 | -0.59 | 9.16  | 9.75  | 0.00131 | 0.00477 |
| ILMN_1661351 | C17ORF81  | NM_203414.1    | -1.60 | -0.68 | 8.33  | 9.01  | 0.00136 | 0.00496 |
| ILMN_1812915 | TNFRSF10B | NM_003842.3    | -1.53 | -0.61 | 7.97  | 8.58  | 0.00138 | 0.00502 |
| ILMN_2413508 | CD97      | NM_001784.3    | -1.73 | -0.79 | 8.08  | 8.87  | 0.00141 | 0.00512 |
| ILMN_1790637 | FLJ22531  | NM_024650.2    | -1.64 | -0.71 | 9.78  | 10.49 | 0.00142 | 0.00513 |
| ILMN_1796455 | RYR3      | NM_001036.2    | -1.59 | -0.67 | 9.07  | 9.75  | 0.00143 | 0.00519 |
| ILMN_1747630 | DEK       | NM_003472.2    | -1.61 | -0.69 | 11.38 | 12.08 | 0.00145 | 0.00525 |
| ILMN_1806804 | USP14     | NM_005151.2    | -1.53 | -0.61 | 10.28 | 10.89 | 0.00148 | 0.00536 |
| ILMN_1770537 | NGFRAP1   | NM_014380.1    | -1.59 | -0.67 | 10.82 | 11.49 | 0.00151 | 0.00545 |
| ILMN_1758846 | ANKRD40   | NM_052855.2    | -1.56 | -0.64 | 8.98  | 9.63  | 0.00158 | 0.00566 |
| ILMN_1701482 | POFUT2    | NM_015227.3    | -1.53 | -0.61 | 9.77  | 10.38 | 0.00162 | 0.0058  |
| ILMN_1753468 | CD63      | NM_001780.3    | -1.52 | -0.6  | 11.85 | 12.45 | 0.00164 | 0.00586 |
| ILMN_1708798 | EAF2      | NM_018456.4    | -1.52 | -0.6  | 7.99  | 8.59  | 0.00166 | 0.00593 |
| ILMN_1781383 | NFKBIL2   | NM_013432.3    | -1.59 | -0.67 | 8.04  | 8.7   | 0.00167 | 0.00595 |
| ILMN_2292748 | ING5      | NM_032329.4    | -1.58 | -0.66 | 8.73  | 9.39  | 0.00171 | 0.00608 |
| ILMN_1784493 | LOC401286 | NM_001023565.1 | -1.54 | -0.62 | 7.54  | 8.16  | 0.00175 | 0.0062  |
| ILMN_2104784 | FKBP3     | NM_002013.2    | -1.52 | -0.6  | 11.19 | 11.8  | 0.00175 | 0.00621 |
| ILMN_1732776 | NUP98     | NM_139131.2    | -1.51 | -0.59 | 8.44  | 9.02  | 0.00176 | 0.00623 |
| ILMN_1784300 | TUBA1     | NM_006000.1    | -1.51 | -0.59 | 7.95  | 8.54  | 0.00177 | 0.00626 |
| ILMN_1738572 | USP48     | NM_001032730.1 | -1.53 | -0.61 | 9.23  | 9.84  | 0.00177 | 0.00626 |
| ILMN_2412380 | TSC22D1   | NM_183422.1    | -1.59 | -0.67 | 9.38  | 10.05 | 0.00183 | 0.00646 |
| ILMN_1653001 | CABLES1   | NM_138375.1    | -1.54 | -0.62 | 9.74  | 10.36 | 0.00192 | 0.00675 |
| ILMN_1765729 | MAML2     | NM_032427.1    | -1.54 | -0.62 | 8.86  | 9.48  | 0.00193 | 0.00678 |
| ILMN_1731193 | BCL2L12   | NM_138639.1    | -1.57 | -0.65 | 9.03  | 9.68  | 0.00195 | 0.00684 |
| ILMN_2285375 | SORD      | NM_003104.3    | -1.69 | -0.76 | 7.94  | 8.7   | 0.00197 | 0.0069  |
| ILMN_2205350 | C6ORF66   | NM_014165.1    | -1.51 | -0.59 | 7.72  | 8.32  | 0.00201 | 0.00704 |
| ILMN_1701374 | NUP35     | NM_138285.3    | -1.51 | -0.59 | 9.65  | 10.24 | 0.00209 | 0.00727 |
| ILMN_1747870 | CD3EAP    | NM_012099.1    | -1.62 | -0.7  | 8.43  | 9.13  | 0.00211 | 0.00735 |
| ILMN_1724396 | GCG       | NM_002054.2    | -1.56 | -0.64 | 7.72  | 8.36  | 0.00212 | 0.00736 |
| ILMN_1668778 | PRKAA2    | NM_006252.2    | -1.60 | -0.68 | 7.52  | 8.19  | 0.00214 | 0.00742 |
| ILMN_1751816 | MCTS1     | NM_014060.1    | -1.58 | -0.66 | 8.81  | 9.47  | 0.00214 | 0.00743 |
| ILMN_1745988 | NUDT12    | NM_031438.2    | -1.82 | -0.86 | 8.21  | 9.07  | 0.00217 | 0.0075  |
| ILMN_1700378 | ZWILCH    | NM_017975.2    | -1.54 | -0.62 | 7.97  | 8.58  | 0.00228 | 0.00785 |
| ILMN_2061446 | AADACL1   | NM_020792.3    | -1.75 | -0.81 | 8.91  | 9.72  | 0.0023  | 0.00791 |
| ILMN_1787081 | TADA2L    | NM_001488.3    | -1.52 | -0.6  | 8.32  | 8.92  | 0.00238 | 0.00816 |

Supplementary Table 2

|              |          |             |       |       |      |      |         |         |
|--------------|----------|-------------|-------|-------|------|------|---------|---------|
| ILMN_1690442 | C18ORF45 | NM_032933.3 | -1.82 | -0.86 | 8.92 | 9.78 | 0.00253 | 0.00862 |
| ILMN_1744815 | PVRL1    | NM_203286.1 | -1.52 | -0.6  | 7.95 | 8.55 | 0.00268 | 0.00907 |
| ILMN_1676458 | MRPL11   | NM_170739.1 | -1.53 | -0.61 | 8.17 | 8.79 | 0.00276 | 0.00931 |
| ILMN_2389810 | ATP11C   | NM_173694.3 | -1.68 | -0.75 | 8.32 | 9.07 | 0.00287 | 0.00965 |

**Supplementary Table 3**  
**Complete gene ontology data**

**Upregulated genes at D4 vs T0**

| <b>Category</b> | <b>Term</b>                                                                                             | <b>PValue</b> |
|-----------------|---------------------------------------------------------------------------------------------------------|---------------|
| GOTERM_BP_4     | GO:0007399~nervous system development                                                                   | 2.79E-17      |
| GOTERM_BP_4     | GO:0022008~neurogenesis                                                                                 | 1.06E-10      |
| GOTERM_BP_4     | GO:0030182~neuron differentiation                                                                       | 5.52E-09      |
| GOTERM_BP_4     | GO:0007416~synaptogenesis                                                                               | 1.21E-07      |
| GOTERM_BP_4     | GO:0048666~neuron development                                                                           | 1.77E-07      |
| GOTERM_BP_4     | GO:0048468~cell development                                                                             | 5.78E-07      |
| GOTERM_BP_4     | GO:0000904~cell morphogenesis involved in differentiation                                               | 6.90E-07      |
| GOTERM_BP_4     | GO:0048523~negative regulation of cellular process                                                      | 1.65E-06      |
| GOTERM_BP_4     | GO:0000902~cell morphogenesis                                                                           | 4.78E-06      |
| GOTERM_CC_4     | GO:0005794~Golgi apparatus                                                                              | 5.51E-06      |
| GOTERM_BP_4     | GO:0048812~neuron projection morphogenesis                                                              | 5.94E-06      |
| GOTERM_BP_4     | GO:0048858~cell projection morphogenesis                                                                | 9.77E-06      |
| GOTERM_CC_4     | GO:0044459~plasma membrane part                                                                         | 1.44E-05      |
| GOTERM_BP_4     | GO:0032990~cell part morphogenesis                                                                      | 1.50E-05      |
| GOTERM_CC_4     | GO:0042611~MHC protein complex                                                                          | 2.16E-05      |
| GOTERM_BP_4     | GO:0032989~cellular component morphogenesis                                                             | 3.89E-05      |
| GOTERM_CC_4     | GO:0005578~proteinaceous extracellular matrix                                                           | 7.05E-05      |
| GOTERM_BP_4     | GO:0045595~regulation of cell differentiation                                                           | 7.90E-05      |
| GOTERM_CC_4     | GO:0042613~MHC class II protein complex                                                                 | 9.19E-05      |
| GOTERM_BP_4     | GO:0031327~negative regulation of cellular biosynthetic process                                         | 1.09E-04      |
| GOTERM_BP_4     | GO:0009890~negative regulation of biosynthetic process                                                  | 1.39E-04      |
| GOTERM_CC_4     | GO:0043005~neuron projection                                                                            | 1.96E-04      |
| GOTERM_CC_4     | GO:0030424~axon                                                                                         | 1.97E-04      |
| GOTERM_BP_4     | GO:0010629~negative regulation of gene expression                                                       | 2.02E-04      |
| GOTERM_BP_4     | GO:0045934~negative regulation of nucleobase, nucleoside, nucleotide and nucleic acid metabolic process | 2.17E-04      |
| GOTERM_CC_4     | GO:0048471~perinuclear region of cytoplasm                                                              | 2.48E-04      |
| GOTERM_BP_4     | GO:0051253~negative regulation of RNA metabolic process                                                 | 2.51E-04      |
| GOTERM_CC_4     | GO:0031410~cytoplasmic vesicle                                                                          | 2.69E-04      |
| GOTERM_BP_4     | GO:0007411~axon guidance                                                                                | 2.83E-04      |
| GOTERM_CC_4     | GO:0016023~cytoplasmic membrane-bounded vesicle                                                         | 3.04E-04      |
| GOTERM_BP_4     | GO:0002478~antigen processing and presentation of exogenous peptide antigen                             | 3.17E-04      |
| GOTERM_BP_4     | GO:0051172~negative regulation of nitrogen compound metabolic process                                   | 3.30E-04      |
| GOTERM_BP_4     | GO:0050767~regulation of neurogenesis                                                                   | 3.32E-04      |
| GOTERM_BP_4     | GO:0008285~negative regulation of cell proliferation                                                    | 3.37E-04      |
| GOTERM_BP_4     | GO:0010558~negative regulation of macromolecule biosynthetic process                                    | 3.38E-04      |
| GOTERM_MF_4     | GO:0003712~transcription cofactor activity                                                              | 3.48E-04      |
| GOTERM_BP_4     | GO:0016477~cell migration                                                                               | 4.46E-04      |
| GOTERM_BP_4     | GO:0060284~regulation of cell development                                                               | 4.51E-04      |
| GOTERM_BP_4     | GO:0007268~synaptic transmission                                                                        | 5.93E-04      |
| GOTERM_BP_4     | GO:0007417~central nervous system development                                                           | 8.13E-04      |
| GOTERM_CC_4     | GO:0030054~cell junction                                                                                | 9.49E-04      |
| GOTERM_BP_4     | GO:0051960~regulation of nervous system development                                                     | 9.88E-04      |
| GOTERM_CC_4     | GO:0030672~synaptic vesicle membrane                                                                    | 1.14E-03      |

Supplementary Table 3

|             |                                                                                    |          |
|-------------|------------------------------------------------------------------------------------|----------|
| GOTERM_CC_4 | GO:0000785~chromatin                                                               | 1.26E-03 |
| GOTERM_BP_4 | GO:0048870~cell motility                                                           | 1.43E-03 |
| GOTERM_CC_4 | GO:0030426~growth cone                                                             | 1.60E-03 |
| GOTERM_CC_4 | GO:0044433~cytoplasmic vesicle part                                                | 1.86E-03 |
| GOTERM_BP_4 | GO:0016358~dendrite development                                                    | 1.90E-03 |
| GOTERM_BP_4 | GO:0031324~negative regulation of cellular metabolic process                       | 2.08E-03 |
| GOTERM_BP_4 | GO:0030035~microspike assembly                                                     | 2.40E-03 |
| GOTERM_MF_4 | GO:0046872~metal ion binding                                                       | 2.58E-03 |
| GOTERM_BP_4 | GO:0007156~homophilic cell adhesion                                                | 2.68E-03 |
| GOTERM_BP_4 | GO:0007050~cell cycle arrest                                                       | 3.21E-03 |
| GOTERM_MF_4 | GO:0005085~guanyl-nucleotide exchange factor activity                              | 3.48E-03 |
| GOTERM_BP_4 | GO:0010769~regulation of cell morphogenesis involved in differentiation            | 3.49E-03 |
| GOTERM_BP_4 | GO:0006334~nucleosome assembly                                                     | 3.49E-03 |
| GOTERM_BP_4 | GO:0065004~protein-DNA complex assembly                                            | 3.58E-03 |
| GOTERM_BP_4 | GO:0019226~transmission of nerve impulse                                           | 3.66E-03 |
| GOTERM_BP_4 | GO:0010646~regulation of cell communication                                        | 3.99E-03 |
| GOTERM_CC_4 | GO:0005773~vacuole                                                                 | 4.29E-03 |
| GOTERM_CC_4 | GO:0000786~nucleosome                                                              | 4.40E-03 |
| GOTERM_BP_4 | GO:0007242~intracellular signaling cascade                                         | 4.62E-03 |
| GOTERM_BP_4 | GO:0034728~nucleosome organization                                                 | 4.63E-03 |
| GOTERM_BP_4 | GO:0006325~chromatin organization                                                  | 4.82E-03 |
| GOTERM_BP_4 | GO:0010468~regulation of gene expression                                           | 4.95E-03 |
| GOTERM_BP_4 | GO:0022604~regulation of cell morphogenesis                                        | 5.09E-03 |
| GOTERM_BP_4 | GO:0002495~antigen processing and presentation of peptide antigen via MHC class II | 5.27E-03 |
| GOTERM_BP_4 | GO:0009892~negative regulation of metabolic process                                | 5.54E-03 |
| GOTERM_BP_4 | GO:0010720~positive regulation of cell development                                 | 6.51E-03 |
| GOTERM_BP_4 | GO:0031344~regulation of cell projection organization                              | 6.65E-03 |
| GOTERM_BP_4 | GO:0051094~positive regulation of developmental process                            | 6.65E-03 |
| GOTERM_BP_4 | GO:0022603~regulation of anatomical structure morphogenesis                        | 6.73E-03 |
| GOTERM_CC_4 | GO:0005737~cytoplasm                                                               | 7.02E-03 |
| GOTERM_BP_4 | GO:0010605~negative regulation of macromolecule metabolic process                  | 7.21E-03 |
| GOTERM_MF_4 | GO:0017124~SH3 domain binding                                                      | 7.22E-03 |
| GOTERM_BP_4 | GO:0016049~cell growth                                                             | 7.23E-03 |
| GOTERM_CC_4 | GO:0005874~microtubule                                                             | 7.26E-03 |
| GOTERM_CC_4 | GO:0031225~anchored to membrane                                                    | 7.80E-03 |
| GOTERM_BP_4 | GO:0006897~endocytosis                                                             | 8.30E-03 |
| GOTERM_BP_4 | GO:0010975~regulation of neuron projection development                             | 8.50E-03 |
| GOTERM_MF_4 | GO:0019905~syntaxin binding                                                        | 8.86E-03 |
| GOTERM_MF_4 | GO:0005112~Notch binding                                                           | 9.04E-03 |
| GOTERM_BP_4 | GO:0001502~cartilage condensation                                                  | 9.14E-03 |
| GOTERM_CC_4 | GO:0005886~plasma membrane                                                         | 9.39E-03 |
| GOTERM_BP_4 | GO:0048545~response to steroid hormone stimulus                                    | 1.01E-02 |
| GOTERM_BP_4 | GO:0050680~negative regulation of epithelial cell proliferation                    | 1.01E-02 |
| GOTERM_BP_4 | GO:0043067~regulation of programmed cell death                                     | 1.05E-02 |
| GOTERM_BP_4 | GO:0045597~positive regulation of cell differentiation                             | 1.08E-02 |
| GOTERM_BP_4 | GO:0010941~regulation of cell death                                                | 1.14E-02 |
| GOTERM_BP_4 | GO:0051129~negative regulation of cellular component organization                  | 1.15E-02 |
| GOTERM_CC_4 | GO:0030659~cytoplasmic vesicle membrane                                            | 1.21E-02 |
| GOTERM_BP_4 | GO:0042127~regulation of cell proliferation                                        | 1.23E-02 |



Supplementary Table 3

|             |                                                                                   |          |
|-------------|-----------------------------------------------------------------------------------|----------|
| GOTERM_BP_4 | GO:0051130~positive regulation of cellular component organization                 | 1.24E-02 |
| GOTERM_MF_4 | GO:0005539~glycosaminoglycan binding                                              | 1.28E-02 |
| GOTERM_BP_4 | GO:0051252~regulation of RNA metabolic process                                    | 1.36E-02 |
| GOTERM_BP_4 | GO:0031644~regulation of neurological system process                              | 1.38E-02 |
| GOTERM_MF_4 | GO:0019894~kinesin binding                                                        | 1.39E-02 |
| GOTERM_MF_4 | GO:0042578~phosphoric ester hydrolase activity                                    | 1.39E-02 |
| GOTERM_BP_4 | GO:0051093~negative regulation of developmental process                           | 1.44E-02 |
| GOTERM_BP_4 | GO:0031346~positive regulation of cell projection organization                    | 1.52E-02 |
| GOTERM_BP_4 | GO:0051969~regulation of transmission of nerve impulse                            | 1.59E-02 |
| GOTERM_BP_4 | GO:0009966~regulation of signal transduction                                      | 1.60E-02 |
| GOTERM_CC_4 | GO:0012506~vesicle membrane                                                       | 1.67E-02 |
| GOTERM_MF_4 | GO:0001972~retinoic acid binding                                                  | 1.69E-02 |
| GOTERM_BP_4 | GO:0043254~regulation of protein complex assembly                                 | 1.69E-02 |
| GOTERM_BP_4 | GO:0045637~regulation of myeloid cell differentiation                             | 1.78E-02 |
| GOTERM_BP_4 | GO:0031334~positive regulation of protein complex assembly                        | 1.81E-02 |
| GOTERM_BP_4 | GO:0006350~transcription                                                          | 1.82E-02 |
| GOTERM_BP_4 | GO:0015807~L-amino acid transport                                                 | 1.93E-02 |
| GOTERM_BP_4 | GO:0048513~organ development                                                      | 1.97E-02 |
| GOTERM_BP_4 | GO:0010721~negative regulation of cell development                                | 2.03E-02 |
| GOTERM_CC_4 | GO:0042734~presynaptic membrane                                                   | 2.04E-02 |
| GOTERM_BP_4 | GO:0031326~regulation of cellular biosynthetic process                            | 2.05E-02 |
| GOTERM_BP_4 | GO:0045792~negative regulation of cell size                                       | 2.08E-02 |
| GOTERM_BP_4 | GO:0045596~negative regulation of cell differentiation                            | 2.09E-02 |
| GOTERM_MF_4 | GO:0008083~growth factor activity                                                 | 2.09E-02 |
| GOTERM_CC_4 | GO:0031226~intrinsic to plasma membrane                                           | 2.10E-02 |
| GOTERM_BP_4 | GO:0030278~regulation of ossification                                             | 2.16E-02 |
| GOTERM_BP_4 | GO:0030308~negative regulation of cell growth                                     | 2.19E-02 |
| GOTERM_BP_4 | GO:0009887~organ morphogenesis                                                    | 2.30E-02 |
| GOTERM_BP_4 | GO:0002474~antigen processing and presentation of peptide antigen via MHC class I | 2.33E-02 |
| GOTERM_BP_4 | GO:0016101~diterpenoid metabolic process                                          | 2.39E-02 |
| GOTERM_BP_4 | GO:0016339~calcium-dependent cell-cell adhesion                                   | 2.39E-02 |
| GOTERM_CC_4 | GO:0009898~internal side of plasma membrane                                       | 2.41E-02 |
| GOTERM_BP_4 | GO:0009889~regulation of biosynthetic process                                     | 2.47E-02 |
| GOTERM_BP_4 | GO:0010556~regulation of macromolecule biosynthetic process                       | 2.55E-02 |
| GOTERM_BP_4 | GO:0007423~sensory organ development                                              | 2.60E-02 |
| GOTERM_BP_4 | GO:0014031~mesenchymal cell development                                           | 2.65E-02 |
| GOTERM_BP_4 | GO:0048762~mesenchymal cell differentiation                                       | 2.65E-02 |
| GOTERM_BP_4 | GO:0014855~striated muscle cell proliferation                                     | 2.66E-02 |
| GOTERM_BP_4 | GO:0055017~cardiac muscle tissue growth                                           | 2.66E-02 |
| GOTERM_BP_4 | GO:0034109~homotypic cell-cell adhesion                                           | 2.66E-02 |
| GOTERM_BP_4 | GO:0008354~germ cell migration                                                    | 2.68E-02 |
| GOTERM_BP_4 | GO:0050772~positive regulation of axonogenesis                                    | 2.93E-02 |
| GOTERM_BP_4 | GO:0042551~neuron maturation                                                      | 2.97E-02 |
| GOTERM_BP_4 | GO:0060485~mesenchyme development                                                 | 3.01E-02 |
| GOTERM_BP_4 | GO:0051216~cartilage development                                                  | 3.07E-02 |
| GOTERM_BP_4 | GO:0007420~brain development                                                      | 3.07E-02 |
| GOTERM_BP_4 | GO:0045786~negative regulation of cell cycle                                      | 3.22E-02 |
| GOTERM_BP_4 | GO:0045165~cell fate commitment                                                   | 3.31E-02 |
| GOTERM_BP_4 | GO:0051259~protein oligomerization                                                | 3.90E-02 |

Supplementary Table 3

|             |                                                                                                |          |
|-------------|------------------------------------------------------------------------------------------------|----------|
| GOTERM_BP_4 | GO:0021543~pallium development                                                                 | 3.90E-02 |
| GOTERM_BP_4 | GO:0008347~glial cell migration                                                                | 3.95E-02 |
| GOTERM_BP_4 | GO:0019219~regulation of nucleobase, nucleoside, nucleotide and nucleic acid metabolic process | 4.31E-02 |
| GOTERM_BP_4 | GO:0031099~regeneration                                                                        | 4.34E-02 |
| GOTERM_MF_4 | GO:0015631~tubulin binding                                                                     | 4.35E-02 |
| GOTERM_BP_4 | GO:0032409~regulation of transporter activity                                                  | 4.43E-02 |
| GOTERM_CC_4 | GO:0044431~Golgi apparatus part                                                                | 4.43E-02 |
| GOTERM_CC_4 | GO:0044420~extracellular matrix part                                                           | 4.55E-02 |
| GOTERM_BP_4 | GO:0048488~synaptic vesicle endocytosis                                                        | 4.60E-02 |
| GOTERM_BP_4 | GO:0051270~regulation of cell motion                                                           | 4.73E-02 |
| GOTERM_BP_4 | GO:0001655~urogenital system development                                                       | 4.75E-02 |
| GOTERM_BP_4 | GO:0050678~regulation of epithelial cell proliferation                                         | 4.77E-02 |
| GOTERM_BP_4 | GO:0030097~hemopoiesis                                                                         | 4.91E-02 |

### Downregulated genes at D4 vs T0

| Category    | Term                                                    | PValue   |
|-------------|---------------------------------------------------------|----------|
| GOTERM_CC_4 | GO:0044428~nuclear part                                 | 5.61E-29 |
| GOTERM_BP_4 | GO:0022403~cell cycle phase                             | 4.93E-26 |
| GOTERM_CC_4 | GO:0070013~intracellular organelle lumen                | 1.98E-25 |
| GOTERM_CC_4 | GO:0031981~nuclear lumen                                | 3.51E-24 |
| GOTERM_CC_4 | GO:0044446~intracellular organelle part                 | 6.83E-24 |
| GOTERM_BP_4 | GO:0000279~M phase                                      | 1.67E-23 |
| GOTERM_CC_4 | GO:0043232~intracellular non-membrane-bounded organelle | 4.13E-22 |
| GOTERM_MF_4 | GO:0030554~adenyl nucleotide binding                    | 2.42E-20 |
| GOTERM_BP_4 | GO:0006259~DNA metabolic process                        | 3.17E-20 |
| GOTERM_BP_4 | GO:0000280~nuclear division                             | 6.11E-20 |
| GOTERM_BP_4 | GO:0007067~mitosis                                      | 6.11E-20 |
| GOTERM_BP_4 | GO:0000087~M phase of mitotic cell cycle                | 1.09E-19 |
| GOTERM_MF_4 | GO:0032555~purine ribonucleotide binding                | 1.70E-18 |
| GOTERM_CC_4 | GO:0044424~intracellular part                           | 2.53E-17 |
| GOTERM_CC_4 | GO:0005829~cytosol                                      | 5.59E-15 |
| GOTERM_CC_4 | GO:0005737~cytoplasm                                    | 2.05E-13 |
| GOTERM_CC_4 | GO:0005694~chromosome                                   | 8.46E-13 |
| GOTERM_CC_4 | GO:0005654~nucleoplasm                                  | 1.83E-12 |
| GOTERM_CC_4 | GO:0005634~nucleus                                      | 4.11E-12 |
| GOTERM_CC_4 | GO:0043229~intracellular organelle                      | 8.14E-12 |
| GOTERM_CC_4 | GO:0000775~chromosome, centromeric region               | 3.70E-11 |
| GOTERM_CC_4 | GO:0044427~chromosomal part                             | 7.79E-11 |
| GOTERM_CC_4 | GO:0043231~intracellular membrane-bounded organelle     | 2.36E-10 |
| GOTERM_CC_4 | GO:0005730~nucleolus                                    | 3.75E-10 |
| GOTERM_BP_4 | GO:0016126~sterol biosynthetic process                  | 4.31E-10 |
| GOTERM_CC_4 | GO:0000777~condensed chromosome kinetochore             | 9.98E-09 |
| GOTERM_CC_4 | GO:0000776~kinetochore                                  | 2.14E-08 |
| GOTERM_BP_4 | GO:0051726~regulation of cell cycle                     | 2.20E-08 |
| GOTERM_CC_4 | GO:0044444~cytoplasmic part                             | 2.33E-08 |
| GOTERM_BP_4 | GO:0051325~interphase                                   | 5.89E-08 |
| GOTERM_BP_4 | GO:0051329~interphase of mitotic cell cycle             | 1.09E-07 |

Supplementary Table 3

|             |                                                                                               |          |
|-------------|-----------------------------------------------------------------------------------------------|----------|
| GOTERM_CC_4 | GO:0005635~nuclear envelope                                                                   | 1.93E-07 |
| GOTERM_MF_4 | GO:0016301~kinase activity                                                                    | 2.82E-07 |
| GOTERM_BP_4 | GO:0006364~rRNA processing                                                                    | 3.38E-07 |
| GOTERM_CC_4 | GO:0000228~nuclear chromosome                                                                 | 4.01E-07 |
| GOTERM_BP_4 | GO:0000226~microtubule cytoskeleton organization                                              | 4.36E-07 |
| GOTERM_BP_4 | GO:0051338~regulation of transferase activity                                                 | 9.58E-07 |
| GOTERM_BP_4 | GO:0007051~spindle organization                                                               | 1.27E-06 |
| GOTERM_BP_4 | GO:0006694~steroid biosynthetic process                                                       | 2.17E-06 |
| GOTERM_CC_4 | GO:0005739~mitochondrion                                                                      | 2.28E-06 |
| GOTERM_CC_4 | GO:0005819~spindle                                                                            | 3.54E-06 |
| GOTERM_BP_4 | GO:0007346~regulation of mitotic cell cycle                                                   | 3.99E-06 |
| GOTERM_CC_4 | GO:0005643~nuclear pore                                                                       | 5.45E-06 |
| GOTERM_BP_4 | GO:0000075~cell cycle checkpoint                                                              | 5.62E-06 |
| GOTERM_BP_4 | GO:0016070~RNA metabolic process                                                              | 6.64E-06 |
| GOTERM_BP_4 | GO:0051174~regulation of phosphorus metabolic process                                         | 7.72E-06 |
| GOTERM_CC_4 | GO:0001726~ruffle                                                                             | 9.43E-06 |
| GOTERM_CC_4 | GO:0046930~pore complex                                                                       | 1.35E-05 |
| GOTERM_BP_4 | GO:0010564~regulation of cell cycle process                                                   | 1.39E-05 |
| GOTERM_MF_4 | GO:0016773~phosphotransferase activity, alcohol group as acceptor                             | 1.40E-05 |
| GOTERM_BP_4 | GO:0051310~metaphase plate congression                                                        | 2.30E-05 |
| GOTERM_BP_4 | GO:0009113~purine base biosynthetic process                                                   | 2.36E-05 |
| GOTERM_CC_4 | GO:0005657~replication fork                                                                   | 2.68E-05 |
| GOTERM_BP_4 | GO:0006461~protein complex assembly                                                           | 2.79E-05 |
| GOTERM_BP_4 | GO:0050000~chromosome localization                                                            | 3.38E-05 |
| GOTERM_BP_4 | GO:0051303~establishment of chromosome localization                                           | 3.38E-05 |
| GOTERM_MF_4 | GO:0016818~hydrolase activity, acting on acid anhydrides, in phosphorus-containing anhydrides | 3.81E-05 |
| GOTERM_BP_4 | GO:0051052~regulation of DNA metabolic process                                                | 4.03E-05 |
| GOTERM_CC_4 | GO:0031967~organelle envelope                                                                 | 4.70E-05 |
| GOTERM_BP_4 | GO:0044275~cellular carbohydrate catabolic process                                            | 6.05E-05 |
| GOTERM_BP_4 | GO:0044267~cellular protein metabolic process                                                 | 6.92E-05 |
| GOTERM_BP_4 | GO:0043623~cellular protein complex assembly                                                  | 9.27E-05 |
| GOTERM_CC_4 | GO:0005856~cytoskeleton                                                                       | 1.07E-04 |
| GOTERM_BP_4 | GO:0006396~RNA processing                                                                     | 1.38E-04 |
| GOTERM_MF_4 | GO:0008168~methyltransferase activity                                                         | 1.43E-04 |
| GOTERM_CC_4 | GO:0005606~laminin-1 complex                                                                  | 1.61E-04 |
| GOTERM_BP_4 | GO:0051327~M phase of meiotic cell cycle                                                      | 1.64E-04 |
| GOTERM_BP_4 | GO:0007126~meiosis                                                                            | 1.64E-04 |
| GOTERM_BP_4 | GO:0008299~isoprenoid biosynthetic process                                                    | 1.74E-04 |
| GOTERM_CC_4 | GO:0005840~ribosome                                                                           | 1.83E-04 |
| GOTERM_BP_4 | GO:0000079~regulation of cyclin-dependent protein kinase activity                             | 1.92E-04 |
| GOTERM_CC_4 | GO:0034399~nuclear periphery                                                                  | 1.95E-04 |
| GOTERM_MF_4 | GO:0043566~structure-specific DNA binding                                                     | 2.28E-04 |
| GOTERM_MF_4 | GO:0016779~nucleotidyltransferase activity                                                    | 2.31E-04 |
| GOTERM_CC_4 | GO:0030529~ribonucleoprotein complex                                                          | 3.32E-04 |
| GOTERM_BP_4 | GO:0055086~nucleobase, nucleoside and nucleotide metabolic process                            | 3.48E-04 |
| GOTERM_BP_4 | GO:0006412~translation                                                                        | 3.76E-04 |
| GOTERM_BP_4 | GO:0044271~nitrogen compound biosynthetic process                                             | 3.81E-04 |
| GOTERM_BP_4 | GO:0048514~blood vessel morphogenesis                                                         | 3.86E-04 |
| GOTERM_BP_4 | GO:0008202~steroid metabolic process                                                          | 4.62E-04 |

Supplementary Table 3

|             |                                                                                      |          |
|-------------|--------------------------------------------------------------------------------------|----------|
| GOTERM_BP_4 | GO:0001944~vasculature development                                                   | 4.76E-04 |
| GOTERM_CC_4 | GO:0044454~nuclear chromosome part                                                   | 4.85E-04 |
| GOTERM_BP_4 | GO:0000070~mitotic sister chromatid segregation                                      | 5.57E-04 |
| GOTERM_BP_4 | GO:0008203~cholesterol metabolic process                                             | 5.71E-04 |
| GOTERM_BP_4 | GO:0009112~nucleobase metabolic process                                              | 6.16E-04 |
| GOTERM_MF_4 | GO:0042803~protein homodimerization activity                                         | 6.71E-04 |
| GOTERM_BP_4 | GO:0006796~phosphate metabolic process                                               | 6.73E-04 |
| GOTERM_BP_4 | GO:0000819~sister chromatid segregation                                              | 7.22E-04 |
| GOTERM_BP_4 | GO:0046364~monosaccharide biosynthetic process                                       | 7.22E-04 |
| GOTERM_CC_4 | GO:0016363~nuclear matrix                                                            | 8.13E-04 |
| GOTERM_CC_4 | GO:0043256~laminin complex                                                           | 8.17E-04 |
| GOTERM_BP_4 | GO:0006520~cellular amino acid metabolic process                                     | 8.84E-04 |
| GOTERM_BP_4 | GO:0007080~mitotic metaphase plate congression                                       | 8.98E-04 |
| GOTERM_BP_4 | GO:0051656~establishment of organelle localization                                   | 1.08E-03 |
| GOTERM_BP_4 | GO:0043086~negative regulation of catalytic activity                                 | 1.11E-03 |
| GOTERM_CC_4 | GO:0005663~DNA replication factor C complex                                          | 1.18E-03 |
| GOTERM_BP_4 | GO:0034622~cellular macromolecular complex assembly                                  | 1.21E-03 |
| GOTERM_BP_4 | GO:0001525~angiogenesis                                                              | 1.25E-03 |
| GOTERM_BP_4 | GO:0046365~monosaccharide catabolic process                                          | 1.27E-03 |
| GOTERM_BP_4 | GO:0006839~mitochondrial transport                                                   | 1.36E-03 |
| GOTERM_CC_4 | GO:0005625~soluble fraction                                                          | 1.40E-03 |
| GOTERM_BP_4 | GO:0044106~cellular amine metabolic process                                          | 1.40E-03 |
| GOTERM_BP_4 | GO:0006096~glycolysis                                                                | 1.51E-03 |
| GOTERM_BP_4 | GO:0005996~monosaccharide metabolic process                                          | 1.56E-03 |
| GOTERM_BP_4 | GO:0007127~meiosis I                                                                 | 1.84E-03 |
| GOTERM_BP_4 | GO:0016052~carbohydrate catabolic process                                            | 1.96E-03 |
| GOTERM_BP_4 | GO:0043436~oxoacid metabolic process                                                 | 2.09E-03 |
| GOTERM_CC_4 | GO:0005874~microtubule                                                               | 2.11E-03 |
| GOTERM_BP_4 | GO:0051248~negative regulation of protein metabolic process                          | 2.26E-03 |
| GOTERM_BP_4 | GO:0030334~regulation of cell migration                                              | 2.29E-03 |
| GOTERM_BP_4 | GO:0032269~negative regulation of cellular protein metabolic process                 | 2.39E-03 |
| GOTERM_BP_4 | GO:0007088~regulation of mitosis                                                     | 2.56E-03 |
| GOTERM_BP_4 | GO:0051783~regulation of nuclear division                                            | 2.56E-03 |
| GOTERM_MF_4 | GO:0016538~cyclin-dependent protein kinase regulator activity                        | 2.68E-03 |
| GOTERM_BP_4 | GO:0043412~biopolymer modification                                                   | 2.69E-03 |
| GOTERM_MF_4 | GO:0003779~actin binding                                                             | 2.87E-03 |
| GOTERM_BP_4 | GO:0006626~protein targeting to mitochondrion                                        | 3.32E-03 |
| GOTERM_BP_4 | GO:0051439~regulation of ubiquitin-protein ligase activity during mitotic cell cycle | 3.47E-03 |
| GOTERM_CC_4 | GO:0005862~muscle thin filament tropomyosin                                          | 3.51E-03 |
| GOTERM_MF_4 | GO:0009982~pseudouridine synthase activity                                           | 3.63E-03 |
| GOTERM_BP_4 | GO:0051028~mRNA transport                                                            | 3.64E-03 |
| GOTERM_MF_4 | GO:0005096~GTPase activator activity                                                 | 3.76E-03 |
| GOTERM_CC_4 | GO:0000178~exosome (RNase complex)                                                   | 3.99E-03 |
| GOTERM_MF_4 | GO:0005528~FK506 binding                                                             | 4.34E-03 |
| GOTERM_BP_4 | GO:0051270~regulation of cell motion                                                 | 4.79E-03 |
| GOTERM_BP_4 | GO:0010212~response to ionizing radiation                                            | 4.91E-03 |
| GOTERM_CC_4 | GO:0000313~organellar ribosome                                                       | 4.97E-03 |
| GOTERM_CC_4 | GO:0005761~mitochondrial ribosome                                                    | 4.97E-03 |
| GOTERM_BP_4 | GO:0007242~intracellular signaling cascade                                           | 5.20E-03 |

Supplementary Table 3

|             |                                                                                               |          |
|-------------|-----------------------------------------------------------------------------------------------|----------|
| GOTERM_BP_4 | GO:0050658~RNA transport                                                                      | 5.22E-03 |
| GOTERM_BP_4 | GO:0050657~nucleic acid transport                                                             | 5.22E-03 |
| GOTERM_BP_4 | GO:0051236~establishment of RNA localization                                                  | 5.22E-03 |
| GOTERM_BP_4 | GO:0045597~positive regulation of cell differentiation                                        | 5.31E-03 |
| GOTERM_BP_4 | GO:0051340~regulation of ligase activity                                                      | 5.31E-03 |
| GOTERM_BP_4 | GO:0008610~lipid biosynthetic process                                                         | 5.46E-03 |
| GOTERM_BP_4 | GO:0015931~nucleobase, nucleoside, nucleotide and nucleic acid transport                      | 5.52E-03 |
| GOTERM_BP_4 | GO:0022603~regulation of anatomical structure morphogenesis                                   | 5.69E-03 |
| GOTERM_CC_4 | GO:0044430~cytoskeletal part                                                                  | 6.24E-03 |
| GOTERM_BP_4 | GO:0051259~protein oligomerization                                                            | 6.29E-03 |
| GOTERM_CC_4 | GO:0033279~ribosomal subunit                                                                  | 6.96E-03 |
| GOTERM_BP_4 | GO:0034654~nucleobase, nucleoside, nucleotide and nucleic acid biosynthetic process           | 6.97E-03 |
| GOTERM_BP_4 | GO:0044262~cellular carbohydrate metabolic process                                            | 7.05E-03 |
| GOTERM_BP_4 | GO:0000082~G1/S transition of mitotic cell cycle                                              | 7.32E-03 |
| GOTERM_BP_4 | GO:0006720~isoprenoid metabolic process                                                       | 7.36E-03 |
| GOTERM_BP_4 | GO:0007131~reciprocal meiotic recombination                                                   | 7.51E-03 |
| GOTERM_MF_4 | GO:0003689~DNA clamp loader activity                                                          | 7.65E-03 |
| GOTERM_BP_4 | GO:0031099~regeneration                                                                       | 7.73E-03 |
| GOTERM_CC_4 | GO:0046696~lipopolysaccharide receptor complex                                                | 8.13E-03 |
| GOTERM_CC_4 | GO:0016323~basolateral plasma membrane                                                        | 8.16E-03 |
| GOTERM_BP_4 | GO:0051149~positive regulation of muscle cell differentiation                                 | 8.39E-03 |
| GOTERM_CC_4 | GO:0015934~large ribosomal subunit                                                            | 8.47E-03 |
| GOTERM_BP_4 | GO:0042060~wound healing                                                                      | 8.67E-03 |
| GOTERM_BP_4 | GO:0033043~regulation of organelle organization                                               | 8.71E-03 |
| GOTERM_BP_4 | GO:0032268~regulation of cellular protein metabolic process                                   | 8.99E-03 |
| GOTERM_BP_4 | GO:0022604~regulation of cell morphogenesis                                                   | 9.03E-03 |
| GOTERM_MF_4 | GO:0016876~ligase activity, forming aminoacyl-tRNA and related compounds                      | 9.13E-03 |
| GOTERM_MF_4 | GO:0004518~nuclease activity                                                                  | 9.47E-03 |
| GOTERM_BP_4 | GO:0051436~negative regulation of ubiquitin-protein ligase activity during mitotic cell cycle | 9.97E-03 |
| GOTERM_BP_4 | GO:0019538~protein metabolic process                                                          | 1.06E-02 |
| GOTERM_CC_4 | GO:0044452~nucleolar part                                                                     | 1.07E-02 |
| GOTERM_BP_4 | GO:0009309~amine biosynthetic process                                                         | 1.11E-02 |
| GOTERM_CC_4 | GO:0000502~proteasome complex                                                                 | 1.11E-02 |
| GOTERM_CC_4 | GO:0048471~perinuclear region of cytoplasm                                                    | 1.12E-02 |
| GOTERM_BP_4 | GO:0034623~cellular macromolecular complex disassembly                                        | 1.20E-02 |
| GOTERM_BP_4 | GO:0019318~hexose metabolic process                                                           | 1.24E-02 |
| GOTERM_CC_4 | GO:0000922~spindle pole                                                                       | 1.27E-02 |
| GOTERM_BP_4 | GO:0006915~apoptosis                                                                          | 1.27E-02 |
| GOTERM_BP_4 | GO:0007052~mitotic spindle organization                                                       | 1.28E-02 |
| GOTERM_BP_4 | GO:0048522~positive regulation of cellular process                                            | 1.30E-02 |
| GOTERM_BP_4 | GO:0051053~negative regulation of DNA metabolic process                                       | 1.32E-02 |
| GOTERM_BP_4 | GO:0009165~nucleotide biosynthetic process                                                    | 1.34E-02 |
| GOTERM_BP_4 | GO:0016053~organic acid biosynthetic process                                                  | 1.42E-02 |
| GOTERM_CC_4 | GO:0030054~cell junction                                                                      | 1.44E-02 |
| GOTERM_BP_4 | GO:0051437~positive regulation of ubiquitin-protein ligase activity during mitotic cell cycle | 1.45E-02 |
| GOTERM_BP_4 | GO:0000086~G2/M transition of mitotic cell cycle                                              | 1.46E-02 |
| GOTERM_CC_4 | GO:0005581~collagen                                                                           | 1.52E-02 |
| GOTERM_BP_4 | GO:0001570~vasculogenesis                                                                     | 1.56E-02 |
| GOTERM_CC_4 | GO:0030027~lamellipodium                                                                      | 1.58E-02 |

Supplementary Table 3

|             |                                                                                                         |          |
|-------------|---------------------------------------------------------------------------------------------------------|----------|
| GOTERM_BP_4 | GO:0043542~endothelial cell migration                                                                   | 1.84E-02 |
| GOTERM_BP_4 | GO:0034637~cellular carbohydrate biosynthetic process                                                   | 1.84E-02 |
| GOTERM_BP_4 | GO:0051246~regulation of protein metabolic process                                                      | 1.86E-02 |
| GOTERM_BP_4 | GO:0032270~positive regulation of cellular protein metabolic process                                    | 1.86E-02 |
| GOTERM_BP_4 | GO:0051247~positive regulation of protein metabolic process                                             | 2.05E-02 |
| GOTERM_CC_4 | GO:0005605~basal lamina                                                                                 | 2.06E-02 |
| GOTERM_BP_4 | GO:0008284~positive regulation of cell proliferation                                                    | 2.11E-02 |
| GOTERM_BP_4 | GO:0048468~cell development                                                                             | 2.24E-02 |
| GOTERM_CC_4 | GO:0044420~extracellular matrix part                                                                    | 2.28E-02 |
| GOTERM_MF_4 | GO:0003684~damaged DNA binding                                                                          | 2.54E-02 |
| GOTERM_BP_4 | GO:0048523~negative regulation of cellular process                                                      | 2.54E-02 |
| GOTERM_CC_4 | GO:0000428~DNA-directed RNA polymerase complex                                                          | 2.55E-02 |
| GOTERM_BP_4 | GO:0002208~somatic diversification of immunoglobulins during immune response                            | 2.58E-02 |
| GOTERM_BP_4 | GO:0051319~G2 phase                                                                                     | 2.59E-02 |
| GOTERM_CC_4 | GO:0032133~chromosome passenger complex                                                                 | 2.71E-02 |
| GOTERM_BP_4 | GO:0002562~somatic diversification of immune receptors via germline recombination within a single locus | 2.79E-02 |
| GOTERM_BP_4 | GO:0031344~regulation of cell projection organization                                                   | 2.80E-02 |
| GOTERM_BP_4 | GO:0016447~somatic recombination of immunoglobulin gene segments                                        | 2.84E-02 |
| GOTERM_BP_4 | GO:0002758~innate immune response-activating signal transduction                                        | 2.84E-02 |
| GOTERM_CC_4 | GO:0044429~mitochondrial part                                                                           | 3.00E-02 |
| GOTERM_BP_4 | GO:0048513~organ development                                                                            | 3.03E-02 |
| GOTERM_CC_4 | GO:0030880~RNA polymerase complex                                                                       | 3.08E-02 |
| GOTERM_MF_4 | GO:0016790~thiolester hydrolase activity                                                                | 3.14E-02 |
| GOTERM_CC_4 | GO:0005759~mitochondrial matrix                                                                         | 3.18E-02 |
| GOTERM_CC_4 | GO:0031980~mitochondrial lumen                                                                          | 3.18E-02 |
| GOTERM_CC_4 | GO:0044445~cytosolic part                                                                               | 3.20E-02 |
| GOTERM_MF_4 | GO:0019900~kinase binding                                                                               | 3.23E-02 |
| GOTERM_BP_4 | GO:0010646~regulation of cell communication                                                             | 3.27E-02 |
| GOTERM_BP_4 | GO:0050974~detection of mechanical stimulus involved in sensory perception                              | 3.44E-02 |
| GOTERM_BP_4 | GO:0031109~microtubule polymerization or depolymerization                                               | 3.44E-02 |
| GOTERM_BP_4 | GO:0009966~regulation of signal transduction                                                            | 3.56E-02 |
| GOTERM_BP_4 | GO:0051094~positive regulation of developmental process                                                 | 3.56E-02 |
| GOTERM_BP_4 | GO:0006163~purine nucleotide metabolic process                                                          | 3.63E-02 |
| GOTERM_CC_4 | GO:0000808~origin recognition complex                                                                   | 3.63E-02 |
| GOTERM_BP_4 | GO:0048660~regulation of smooth muscle cell proliferation                                               | 3.67E-02 |
| GOTERM_BP_4 | GO:0051651~maintenance of location in cell                                                              | 3.67E-02 |
| GOTERM_BP_4 | GO:0043085~positive regulation of catalytic activity                                                    | 3.67E-02 |
| GOTERM_BP_4 | GO:0032507~maintenance of protein location in cell                                                      | 3.69E-02 |
| GOTERM_MF_4 | GO:0000049~tRNA binding                                                                                 | 3.72E-02 |
| GOTERM_BP_4 | GO:0010769~regulation of cell morphogenesis involved in differentiation                                 | 3.80E-02 |
| GOTERM_BP_4 | GO:0048646~anatomical structure formation involved in morphogenesis                                     | 3.82E-02 |
| GOTERM_CC_4 | GO:0022626~cytosolic ribosome                                                                           | 3.98E-02 |
| GOTERM_BP_4 | GO:0017038~protein import                                                                               | 4.01E-02 |
| GOTERM_BP_4 | GO:0031100~organ regeneration                                                                           | 4.02E-02 |
| GOTERM_BP_4 | GO:0010975~regulation of neuron projection development                                                  | 4.03E-02 |
| GOTERM_CC_4 | GO:0005732~small nucleolar ribonucleoprotein complex                                                    | 4.03E-02 |
| GOTERM_BP_4 | GO:0048638~regulation of developmental growth                                                           | 4.15E-02 |
| GOTERM_CC_4 | GO:0043601~nuclear replisome                                                                            | 4.17E-02 |
| GOTERM_CC_4 | GO:0030894~replisome                                                                                    | 4.17E-02 |

### Supplementary Table 3

|             |                                                           |          |
|-------------|-----------------------------------------------------------|----------|
| GOTERM_BP_4 | GO:0000904~cell morphogenesis involved in differentiation | 4.20E-02 |
| GOTERM_CC_4 | GO:0044449~contractile fiber part                         | 4.29E-02 |
| GOTERM_BP_4 | GO:002764~immune response-regulating signal transduction  | 4.48E-02 |
| GOTERM_BP_4 | GO:0030199~collagen fibril organization                   | 4.74E-02 |
| GOTERM_BP_4 | GO:0006220~pyrimidine nucleotide metabolic process        | 4.85E-02 |
| GOTERM_BP_4 | GO:0030155~regulation of cell adhesion                    | 4.86E-02 |
| GOTERM_CC_4 | GO:0019898~extrinsic to membrane                          | 4.89E-02 |
| GOTERM_BP_4 | GO:0042127~regulation of cell proliferation               | 4.92E-02 |

**Supplementary Table 4****Overlap of genes changing at D4 in NHNPs and between 18GW and 23GW *in vivo***

| <b>GeneName</b> | <b>Fold Change NHNPs</b> | <b>Fold Change <i>in vivo</i>*</b> |
|-----------------|--------------------------|------------------------------------|
| KSP37           | 98.36                    | 1.37                               |
| CALB2           | 66.26                    | 1.68                               |
| TMEM46          | 63.12                    | -1.82                              |
| BCAN            | 18.77                    | 1.31                               |
| CYP26A1         | 16.80                    | -2.00                              |
| SPON1           | 16.22                    | 1.51                               |
| PPP1R1B         | 14.32                    | -1.56                              |
| GFRA2           | 14.03                    | 1.80                               |
| CLSTN2          | 13.09                    | 1.46                               |
| TKTL1           | 11.88                    | -2.27                              |
| GPR37L1         | 11.79                    | 1.42                               |
| PTGDS           | 11.16                    | 2.24                               |
| CHI3L2          | 10.70                    | 1.37                               |
| RBP1            | 10.63                    | -1.50                              |
| OMG             | 10.34                    | 1.82                               |
| LMO3            | 8.46                     | -1.32                              |
| MAOB            | 7.89                     | 1.51                               |
| WNT5A           | 7.84                     | 1.55                               |
| BCL11B          | 7.52                     | -1.44                              |
| CLU             | 7.26                     | 1.57                               |
| PLEK            | 7.06                     | -1.35                              |
| NNAT            | 6.87                     | -1.31                              |
| RARB            | 6.82                     | -1.38                              |
| PLSCR4          | 6.68                     | 1.38                               |
| GADD45G         | 6.59                     | -1.73                              |
| CD38            | 6.45                     | 1.65                               |
| KCNK2           | 6.41                     | -1.36                              |
| PDGFD           | 6.15                     | -1.87                              |
| ST18            | 6.15                     | -1.98                              |
| FLJ31196        | 6.11                     | 1.46                               |
| STC2            | 6.06                     | 1.35                               |
| C1S             | 5.98                     | 1.34                               |
| CSPG5           | 5.98                     | 1.47                               |
| MFAP2           | 5.74                     | -1.98                              |
| SLC6A1          | 5.66                     | 1.32                               |
| CHGB            | 5.46                     | 1.39                               |
| KLF9            | 5.31                     | 1.58                               |
| YPEL4           | 5.31                     | 1.38                               |
| CEBPD           | 5.24                     | -1.33                              |
| PCP4            | 5.24                     | 1.90                               |
| SNAP91          | 5.13                     | 1.52                               |
| GPNMB           | 5.06                     | -1.45                              |
| CYP26B1         | 4.79                     | 1.58                               |
| IGFBP5          | 4.69                     | 1.41                               |
| ZNF91           | 4.47                     | -1.39                              |



Supplementary Table 4

|          |      |       |
|----------|------|-------|
| LIX1     | 4.41 | 2.08  |
| SNCA     | 4.29 | 1.48  |
| SNF1LK   | 4.26 | -1.44 |
| ZBTB20   | 4.26 | 1.40  |
| MAPK10   | 3.92 | 1.37  |
| SOX4     | 3.81 | -1.35 |
| CYP1B1   | 3.76 | 1.69  |
| BBOX1    | 3.68 | 1.77  |
| SLC39A12 | 3.68 | 1.33  |
| AGT      | 3.66 | 2.72  |
| RGN      | 3.61 | 1.46  |
| ARHGAP20 | 3.53 | 1.31  |
| ATP1B2   | 3.53 | 1.37  |
| CD74     | 3.53 | -1.43 |
| FNDC5    | 3.51 | 1.32  |
| AK5      | 3.46 | 1.45  |
| TGFBI    | 3.46 | 1.35  |
| ZNF312   | 3.46 | -1.68 |
| KCNIP4   | 3.43 | 1.69  |
| AKR1C2   | 3.41 | -1.44 |
| CGI-38   | 3.41 | 2.07  |
| G0S2     | 3.32 | 1.59  |
| PTPRK    | 3.29 | 1.39  |
| MAFB     | 3.23 | 1.59  |
| STOX1    | 3.23 | -1.49 |
| CXCL12   | 3.20 | 1.61  |
| RCOR2    | 3.14 | -1.39 |
| FLJ90013 | 3.12 | 1.43  |
| RAB6B    | 3.12 | 1.38  |
| CTSH     | 3.10 | 1.38  |
| ECM2     | 3.10 | 1.48  |
| CAMK2B   | 3.07 | 1.65  |
| GAL      | 3.05 | -1.43 |
| GDF10    | 2.99 | 1.35  |
| ANGPT1   | 2.97 | 1.52  |
| OPCML    | 2.95 | 1.38  |
| ATOH8    | 2.91 | -1.31 |
| MEIS2    | 2.91 | -1.38 |
| RPRM     | 2.91 | 1.48  |
| SLC17A8  | 2.89 | -2.36 |
| ADHFE1   | 2.87 | 1.35  |
| BEX2     | 2.85 | -1.34 |
| DGKB     | 2.83 | 1.34  |
| SRGAP3   | 2.83 | 1.39  |
| DIRAS2   | 2.79 | 1.43  |
| PLEKHB1  | 2.77 | 1.69  |
| MYCN     | 2.75 | 1.67  |
| SERPINF1 | 2.73 | 1.44  |
| FLJ20152 | 2.71 | 1.48  |

Supplementary Table 4

|           |      |       |
|-----------|------|-------|
| MAP7      | 2.71 | 1.64  |
| NXN       | 2.71 | -1.32 |
| ADD3      | 2.68 | 1.38  |
| RND3      | 2.68 | -1.55 |
| HLA-DRA   | 2.66 | -1.69 |
| NEBL      | 2.66 | 1.89  |
| GFAP      | 2.62 | 2.29  |
| PLXNC1    | 2.62 | 1.45  |
| CRYM      | 2.60 | -1.60 |
| SCN3B     | 2.58 | 1.42  |
| ATP2B4    | 2.57 | 1.32  |
| ABAT      | 2.51 | -1.74 |
| RAI14     | 2.50 | -1.48 |
| TMSL8     | 2.50 | -1.79 |
| GDAP1L1   | 2.46 | -1.35 |
| GJB2      | 2.46 | 1.39  |
| MBNL2     | 2.45 | 1.84  |
| CHD5      | 2.41 | 1.35  |
| SYNE2     | 2.41 | -2.27 |
| CTSB      | 2.39 | 1.32  |
| ALDOC     | 2.38 | 1.58  |
| SERTAD4   | 2.38 | -1.36 |
| ANKRD6    | 2.35 | 1.45  |
| NRIP1     | 2.35 | 1.33  |
| AQP4      | 2.30 | 3.07  |
| ARRDC4    | 2.28 | -1.37 |
| CA8       | 2.28 | 1.39  |
| LOC200810 | 2.27 | 1.89  |
| ARHGEF3   | 2.25 | 1.37  |
| MLC1      | 2.25 | 1.50  |
| NAV2      | 2.23 | 1.39  |
| ID2       | 2.20 | -1.32 |
| NCAM2     | 2.20 | 1.35  |
| HIST2H2BE | 2.19 | -2.25 |
| GLT8D2    | 2.17 | 1.34  |
| PDZRN4    | 2.17 | 1.42  |
| CAMK1G    | 2.14 | 1.33  |
| JPH3      | 2.14 | 1.32  |
| SLC1A2    | 2.14 | 1.31  |
| AQP11     | 2.13 | -1.44 |
| PSD3      | 2.13 | 1.37  |
| GUCY1B3   | 2.08 | 1.54  |
| HIST1H2BD | 2.08 | -2.78 |
| KIAA0367  | 2.08 | 1.49  |
| TSRC1     | 2.08 | 1.36  |
| KIAA0182  | 2.07 | -1.36 |
| FLJ31659  | 2.06 | -1.46 |
| RPS29     | 2.06 | -1.91 |
| SFRP1     | 2.06 | -1.82 |

Supplementary Table 4

|           |      |       |
|-----------|------|-------|
| AGPAT4    | 2.03 | 1.31  |
| PTCHD1    | 2.03 | 1.55  |
| NAPB      | 2.01 | 1.31  |
| CCDC23    | 2.00 | -2.15 |
| IL6ST     | 2.00 | 1.32  |
| LRRTM3    | 1.99 | 1.42  |
| IFIT1     | 1.96 | -1.32 |
| SLIT2     | 1.96 | 1.77  |
| GAD1      | 1.95 | 1.38  |
| AQP1      | 1.93 | 1.31  |
| PROM1     | 1.93 | 1.74  |
| SERTAD2   | 1.93 | 1.46  |
| PPP2R2C   | 1.92 | 1.40  |
| STEAP2    | 1.92 | 1.54  |
| NTN4      | 1.91 | 1.55  |
| TGFBR3    | 1.89 | 1.60  |
| TP53INP1  | 1.88 | -1.32 |
| KIF5A     | 1.87 | 1.40  |
| LOC401152 | 1.87 | 1.34  |
| MDK       | 1.87 | -1.45 |
| ADC       | 1.85 | 1.48  |
| GLG1      | 1.85 | -1.42 |
| TSPAN7    | 1.85 | 1.39  |
| C1QTNF6   | 1.84 | 1.51  |
| HPCA      | 1.83 | 1.87  |
| SLC23A2   | 1.83 | 1.33  |
| SLC26A7   | 1.83 | 1.83  |
| CDH1      | 1.82 | -1.53 |
| PLAG1     | 1.82 | -1.33 |
| SORBS1    | 1.82 | 1.36  |
| MDGA1     | 1.80 | 1.49  |
| NRIP3     | 1.80 | 1.32  |
| DACH1     | 1.79 | -1.51 |
| FSTL5     | 1.79 | 1.84  |
| ING4      | 1.79 | -1.58 |
| SCUBE2    | 1.79 | 1.32  |
| CG018     | 1.78 | 1.31  |
| ATP6V0A1  | 1.77 | -1.59 |
| SOX5      | 1.77 | -1.43 |
| FKBP9L    | 1.75 | 1.59  |
| CTSO      | 1.74 | 1.47  |
| HGF       | 1.74 | 1.39  |
| MOXD1     | 1.74 | -2.21 |
| WDR69     | 1.74 | 1.33  |
| HIST1H2BG | 1.73 | -1.34 |
| KLHL2     | 1.72 | 1.35  |
| DPF3      | 1.71 | 1.38  |
| RAB30     | 1.71 | 1.39  |
| SHANK2    | 1.71 | 1.35  |

Supplementary Table 4

|           |      |       |
|-----------|------|-------|
| ZNF442    | 1.71 | -1.31 |
| HIST1H2AE | 1.69 | -1.88 |
| TOX       | 1.69 | -1.37 |
| BMPR1B    | 1.68 | 1.43  |
| TERF1     | 1.68 | -1.40 |
| TXNDC8    | 1.68 | -1.50 |
| TCN2      | 1.67 | 1.40  |
| ZNF651    | 1.67 | 1.34  |
| GATM      | 1.66 | 1.55  |
| HIST1H4H  | 1.66 | -1.62 |
| KARCA1    | 1.66 | 1.35  |
| MDH1B     | 1.66 | 1.32  |
| SEZ6      | 1.66 | -1.31 |
| AKAP6     | 1.65 | 1.56  |
| DNAH7     | 1.65 | 1.54  |
| EDG4      | 1.65 | -1.35 |
| FLJ23834  | 1.65 | -1.44 |
| MGC33556  | 1.65 | -1.42 |
| UBE2D2    | 1.65 | -1.34 |
| SBP1      | 1.62 | 1.69  |
| ABCB4     | 1.61 | -1.31 |
| FZD2      | 1.61 | -1.48 |
| NPC2      | 1.61 | -1.41 |
| OGFRL1    | 1.61 | 1.59  |
| VPS41     | 1.61 | -1.34 |
| DNAL4     | 1.60 | -1.42 |
| EDNRB     | 1.60 | 1.78  |
| NRP1      | 1.60 | 1.42  |
| PARP11    | 1.60 | -1.40 |
| SCN4B     | 1.60 | 1.38  |
| DKKL1     | 1.59 | -1.36 |
| PLD5      | 1.59 | 1.35  |
| S100B     | 1.59 | 1.72  |
| TIAM1     | 1.59 | 1.31  |
| B3GALT2   | 1.58 | -1.40 |
| NUDT2     | 1.58 | -1.32 |
| NPAS3     | 1.57 | 1.50  |
| RPL22     | 1.57 | 1.48  |
| CA14      | 1.56 | -1.31 |
| DOCK3     | 1.56 | 1.32  |
| GRIA4     | 1.56 | 1.45  |
| KCND1     | 1.56 | 1.47  |
| OGN       | 1.56 | 1.96  |
| TUSC1     | 1.56 | -1.32 |
| FLJ23191  | 1.55 | 1.51  |
| HIST1H4E  | 1.55 | -1.44 |
| NEO1      | 1.55 | 1.42  |
| SP8       | 1.55 | 1.38  |
| CTGF      | 1.54 | 1.32  |

Supplementary Table 4

|          |       |        |
|----------|-------|--------|
| GNAQ     | 1.54  | 1.31   |
| GRP      | 1.54  | 1.40   |
| MAN2B2   | 1.54  | 1.34   |
| MLF1     | 1.54  | 1.47   |
| NFIB     | 1.54  | -1.59  |
| NXPH3    | 1.54  | -1.32  |
| PSD      | 1.54  | 1.35   |
| SATB1    | 1.54  | 1.34   |
| TRIM22   | 1.54  | 1.57   |
| ADAMTS6  | 1.53  | -1.58  |
| GCA      | 1.53  | -1.38  |
| MT1E     | 1.53  | -1.81  |
| MT1H     | 1.53  | 1.56   |
| RDH12    | 1.53  | 1.38   |
| COMMD3   | 1.52  | -1.37  |
| HES6     | 1.52  | -1.59  |
| PAIP2    | 1.52  | -1.34  |
| PIK3R1   | 1.52  | 1.70   |
| TAPBP    | 1.52  | 1.52   |
| FLJ21106 | 1.51  | -1.37  |
| LRRC37B  | 1.51  | -1.69  |
| SEC11L3  | 1.51  | -1.43  |
| USF2     | 1.51  | -1.31  |
| USP9X    | 1.51  | -35.00 |
| GPX7     | -1.49 | -1.30  |
| PHF10    | -1.49 | 1.60   |
| BCL10    | -1.51 | 1.43   |
| BXDC5    | -1.51 | -1.58  |
| DNMT2    | -1.51 | -1.38  |
| GLIS3    | -1.51 | 1.45   |
| NOB1P    | -1.51 | 1.38   |
| PFN1     | -1.51 | -1.36  |
| TOMM22   | -1.51 | -1.33  |
| CASC5    | -1.52 | -2.10  |
| EIF3S9   | -1.52 | -1.37  |
| FBL      | -1.52 | -1.75  |
| FKBP3    | -1.52 | -1.34  |
| HNRPM    | -1.52 | -1.42  |
| MYB      | -1.52 | -1.51  |
| SWAP70   | -1.52 | 1.39   |
| TFAP2C   | -1.52 | -1.99  |
| ARHGAP10 | -1.53 | 1.32   |
| CA10     | -1.53 | 1.42   |
| CHCHD3   | -1.53 | 1.35   |
| CXADR    | -1.53 | -1.33  |
| NOLA3    | -1.53 | -1.58  |
| TSEN2    | -1.53 | -1.32  |
| ANXA1    | -1.54 | 1.97   |
| CCT3     | -1.54 | -1.37  |

Supplementary Table 4

|          |       |       |
|----------|-------|-------|
| GABPB2   | -1.54 | -1.36 |
| GARNL4   | -1.54 | 1.40  |
| UBE2D3   | -1.54 | 3.17  |
| XKRX     | -1.54 | 1.32  |
| GPR109B  | -1.55 | 1.45  |
| GSTZ1    | -1.55 | -1.52 |
| PLP2     | -1.56 | 1.44  |
| TIMM8A   | -1.56 | -1.62 |
| TRNT1    | -1.56 | 1.33  |
| UCHL3    | -1.56 | -1.38 |
| MKI67    | -1.57 | -1.80 |
| PRIM2A   | -1.57 | -1.57 |
| CSDA     | -1.58 | -1.90 |
| FBLN2    | -1.58 | -1.61 |
| MCTP1    | -1.59 | -1.44 |
| PKIG     | -1.59 | -1.56 |
| SLC25A37 | -1.59 | 1.48  |
| FABP3    | -1.60 | 1.50  |
| IGSF4D   | -1.60 | 1.47  |
| PSMD2    | -1.60 | -1.43 |
| SNRPA    | -1.60 | -1.42 |
| TRAP1    | -1.60 | -1.43 |
| WDR67    | -1.60 | -1.30 |
| DEK      | -1.61 | -1.34 |
| DMN      | -1.61 | 1.33  |
| ITGB4BP  | -1.61 | -1.41 |
| MGC61571 | -1.61 | -1.36 |
| PDCL3    | -1.61 | -1.65 |
| SLC2A13  | -1.61 | 1.43  |
| TSTA3    | -1.61 | -1.47 |
| USP6NL   | -1.61 | -1.38 |
| ZBTB8OS  | -1.61 | 1.49  |
| ARPC5L   | -1.62 | -1.37 |
| GLOXD1   | -1.62 | 1.61  |
| HTATIP   | -1.62 | -1.30 |
| LYPLA2   | -1.62 | -1.55 |
| URB      | -1.62 | 2.03  |
| EPHA3    | -1.64 | -1.42 |
| EZH2     | -1.64 | -1.62 |
| FTSJ1    | -1.64 | -1.54 |
| GK       | -1.64 | -2.10 |
| HS3ST1   | -1.64 | -1.39 |
| IL13RA2  | -1.64 | 1.86  |
| KIF15    | -1.64 | -1.73 |
| LBH      | -1.64 | -1.40 |
| LSAMP    | -1.64 | 1.34  |
| DNAH9    | -1.65 | 1.32  |
| GAS7     | -1.65 | 1.48  |
| RBL1     | -1.65 | -1.35 |

Supplementary Table 4

|          |       |       |
|----------|-------|-------|
| RTN4IP1  | -1.65 | -1.31 |
| TPI1     | -1.65 | -1.64 |
| CCNE2    | -1.66 | -1.63 |
| RPL39L   | -1.66 | -1.51 |
| HMGA2    | -1.67 | -1.41 |
| ARHGAP19 | -1.68 | -1.88 |
| ARHGDI1A | -1.68 | -1.51 |
| CENPF    | -1.68 | -1.43 |
| CENTG2   | -1.68 | -1.32 |
| KCNJ16   | -1.69 | 1.34  |
| BXDC1    | -1.71 | -1.51 |
| CKS2     | -1.71 | -1.76 |
| CNAP1    | -1.71 | -1.56 |
| CPNE8    | -1.71 | 2.18  |
| MICB     | -1.71 | -1.31 |
| PCNA     | -1.72 | -1.62 |
| VDAC1    | -1.72 | -1.52 |
| CXCR4    | -1.73 | 1.34  |
| GNG12    | -1.73 | 1.36  |
| MRPS7    | -1.73 | -1.36 |
| NUDT22   | -1.73 | -1.31 |
| RBP7     | -1.73 | 1.81  |
| E2F3     | -1.74 | 1.39  |
| TOP2A    | -1.74 | -2.66 |
| AADA1    | -1.75 | 1.33  |
| DNAJC9   | -1.75 | 1.36  |
| LIN9     | -1.77 | -1.46 |
| TLE4     | -1.77 | -1.61 |
| WDR51B   | -1.77 | -1.39 |
| CCT7     | -1.78 | -1.31 |
| PAQR9    | -1.79 | 1.31  |
| SLC15A3  | -1.79 | -1.55 |
| MRPL17   | -1.80 | -1.38 |
| P2RX5    | -1.80 | 1.90  |
| RAP1GDS1 | -1.80 | 1.39  |
| OR6B1    | -1.82 | -1.32 |
| PLA2G7   | -1.82 | -2.08 |
| TGFB3    | -1.82 | 1.90  |
| TMEM20   | -1.82 | -1.33 |
| TPMT     | -1.83 | 1.87  |
| DCBLD1   | -1.84 | 1.39  |
| MCM2     | -1.84 | -1.42 |
| RASL11A  | -1.84 | 1.33  |
| ACSL4    | -1.85 | 1.31  |
| ADFP     | -1.85 | -1.36 |
| RIMS4    | -1.85 | 1.37  |
| SPATA6   | -1.85 | 1.55  |
| TARS     | -1.85 | 1.42  |
| TOM1L2   | -1.85 | 1.32  |

Supplementary Table 4

|          |       |       |
|----------|-------|-------|
| ALDH1A2  | -1.87 | 1.64  |
| SHC3     | -1.88 | 1.49  |
| SHMT2    | -1.88 | -1.41 |
| ALS2CR4  | -1.89 | 1.30  |
| CHRNA7   | -1.89 | -1.34 |
| COPS6    | -1.89 | -1.32 |
| DGKG     | -1.89 | 1.45  |
| EXOSC9   | -1.89 | -1.31 |
| BACE2    | -1.91 | -1.60 |
| MASTL    | -1.91 | -1.52 |
| CCNA1    | -1.92 | 1.38  |
| MCM3     | -1.93 | -1.32 |
| NEXN     | -1.93 | -1.61 |
| NME2     | -1.93 | -1.45 |
| H2AFX    | -1.95 | -1.32 |
| RUVBL1   | -1.95 | -1.30 |
| DLG2     | -1.96 | 1.89  |
| NUSAP1   | -1.96 | -2.01 |
| BUB1B    | -1.97 | -1.87 |
| PTK2B    | -1.97 | 1.81  |
| ADAMTS3  | -1.99 | 1.72  |
| CRH      | -1.99 | 2.74  |
| EFEMP1   | -1.99 | 1.34  |
| PLK1     | -1.99 | -1.82 |
| PPIL5    | -1.99 | -1.32 |
| ASPM     | -2.00 | -1.71 |
| KCTD9    | -2.00 | 2.02  |
| SCG2     | -2.00 | 1.96  |
| TIMELESS | -2.00 | -1.49 |
| TSPAN15  | -2.00 | -1.32 |
| BAZ1A    | -2.03 | -1.33 |
| MYO5A    | -2.03 | 1.30  |
| CDCA1    | -2.06 | -1.72 |
| S100A11  | -2.06 | -1.37 |
| LRFN5    | -2.07 | 1.42  |
| TMPO     | -2.07 | -1.35 |
| HIST1H3C | -2.08 | -5.11 |
| ATAD2    | -2.10 | -1.35 |
| TRPM3    | -2.10 | -1.31 |
| MAF      | -2.11 | 1.52  |
| PPM2C    | -2.11 | 1.33  |
| PTTG1    | -2.11 | -1.71 |
| COBL     | -2.13 | 1.59  |
| EMP3     | -2.13 | -1.30 |
| CXCL14   | -2.14 | 1.37  |
| SNRPB    | -2.16 | -1.43 |
| KNTC1    | -2.17 | -1.33 |
| PRPS2    | -2.17 | 1.45  |
| RNASEH2A | -2.17 | -1.33 |



Supplementary Table 4

|          |       |       |
|----------|-------|-------|
| GRM8     | -2.19 | 1.35  |
| LOC56902 | -2.19 | -1.32 |
| MBP      | -2.19 | 1.39  |
| SLC25A15 | -2.19 | 1.33  |
| SPAG5    | -2.22 | -1.39 |
| CDK2     | -2.27 | -1.69 |
| TNC      | -2.27 | 1.61  |
| ADA      | -2.28 | -1.34 |
| RFC4     | -2.28 | -1.55 |
| CBR3     | -2.30 | -1.31 |
| MGC26856 | -2.30 | -1.63 |
| NTNG1    | -2.30 | 1.36  |
| SRPX     | -2.30 | 1.39  |
| CDC25A   | -2.31 | -1.53 |
| GSTO1    | -2.31 | -1.37 |
| MCM5     | -2.31 | -1.35 |
| NTF3     | -2.31 | 2.51  |
| PLK4     | -2.31 | -1.48 |
| RNF128   | -2.31 | 1.32  |
| CDC6     | -2.33 | -1.41 |
| DEPDC1B  | -2.33 | -1.49 |
| KIF11    | -2.36 | -2.55 |
| FLJ20516 | -2.39 | -1.54 |
| NME1     | -2.39 | -1.40 |
| ME1      | -2.41 | 1.67  |
| NTRK2    | -2.43 | 1.37  |
| WEE1     | -2.43 | -1.40 |
| FCRLM1   | -2.45 | -1.32 |
| KIAA1727 | -2.45 | -1.93 |
| PRKCD    | -2.45 | 1.38  |
| CDKN2B   | -2.46 | -1.31 |
| DIAPH3   | -2.46 | -1.71 |
| KNTC2    | -2.46 | -1.54 |
| BRCA1    | -2.48 | -1.38 |
| NEK2     | -2.48 | -1.68 |
| CRABP2   | -2.50 | -1.54 |
| DTL      | -2.50 | -2.14 |
| FANCD2   | -2.50 | -1.43 |
| PBK      | -2.50 | -2.23 |
| CASP7    | -2.51 | -1.47 |
| FHL2     | -2.51 | -1.36 |
| CENPE    | -2.53 | -1.42 |
| ZNF365   | -2.53 | 1.33  |
| IL1RAP   | -2.55 | 1.55  |
| POLA2    | -2.57 | -1.34 |
| STK17A   | -2.60 | -1.43 |
| FLJ40629 | -2.62 | -1.68 |
| TIMP4    | -2.62 | 1.41  |
| HTATIP2  | -2.64 | 1.32  |

Supplementary Table 4

|          |       |       |
|----------|-------|-------|
| MPHOSPH1 | -2.64 | -1.38 |
| UHRF1    | -2.64 | -1.48 |
| GMPPB    | -2.66 | -1.32 |
| ANLN     | -2.68 | -1.57 |
| MYOM1    | -2.68 | 1.50  |
| KIAA0101 | -2.69 | -3.19 |
| KIF14    | -2.69 | -1.93 |
| PRC1     | -2.69 | -1.88 |
| LOC51334 | -2.71 | 1.74  |
| OCIAD2   | -2.71 | -1.56 |
| CDKN3    | -2.73 | -1.52 |
| KIAA0746 | -2.73 | -1.47 |
| KLHL4    | -2.75 | 1.90  |
| NRGN     | -2.75 | 1.41  |
| RAD51AP1 | -2.75 | -2.25 |
| TYMS     | -2.75 | -1.35 |
| ZWINT    | -2.75 | -1.96 |
| PDE8B    | -2.81 | -1.39 |
| POLE2    | -2.81 | -1.62 |
| CDC2     | -2.85 | -1.73 |
| TMC7     | -2.85 | -1.93 |
| CHRNA1   | -2.89 | 1.44  |
| NP       | -2.89 | -1.42 |
| RASGRF2  | -2.95 | 2.57  |
| TPX2     | -2.95 | -1.84 |
| MCM10    | -3.07 | -1.58 |
| EML1     | -3.14 | -1.33 |
| CCNB2    | -3.16 | -2.30 |
| GMNN     | -3.16 | -1.50 |
| TTK      | -3.18 | -1.79 |
| UCP2     | -3.18 | -1.31 |
| CDCA3    | -3.20 | -1.75 |
| KIF2C    | -3.20 | -1.39 |
| SGOL1    | -3.20 | -1.56 |
| ASF1B    | -3.23 | -1.85 |
| BIRC5    | -3.23 | -1.39 |
| EXO1     | -3.23 | -1.74 |
| CDCA2    | -3.25 | -1.77 |
| FLJ20105 | -3.27 | -1.31 |
| KIF20A   | -3.27 | -1.80 |
| DBX2     | -3.29 | 1.77  |
| CCNA2    | -3.32 | -1.62 |
| CDCA8    | -3.46 | -1.81 |
| RPL8     | -3.51 | -1.32 |
| LRRC8C   | -3.53 | 1.37  |
| AURKB    | -3.61 | -1.64 |
| FLJ25416 | -3.63 | -1.33 |
| GTSE1    | -3.66 | -1.42 |
| CENPA    | -3.68 | -1.63 |

Supplementary Table 4

|           |        |       |
|-----------|--------|-------|
| MGC4677   | -3.68  | 1.33  |
| MCM7      | -3.71  | -1.36 |
| HELLS     | -3.84  | -1.41 |
| HCAP-G    | -3.86  | -2.25 |
| PTPRT     | -3.86  | 1.31  |
| HMGA1     | -3.92  | -1.36 |
| SYNJ2     | -3.94  | 1.48  |
| KIF18A    | -3.97  | -1.92 |
| CBLN4     | -4.03  | -1.58 |
| BUB1      | -4.08  | -1.62 |
| E2F7      | -4.08  | -1.50 |
| KIF23     | -4.11  | -2.21 |
| GLIPR1    | -4.26  | -1.41 |
| PNOG      | -4.26  | 1.69  |
| DSU       | -4.47  | 1.32  |
| DLG7      | -4.50  | -2.32 |
| ADAMTS9   | -4.53  | 1.32  |
| PHF19     | -4.53  | -1.69 |
| RRM2      | -4.59  | -2.38 |
| LGR4      | -4.63  | 1.46  |
| CDC20     | -4.69  | -3.71 |
| CSMD2     | -4.82  | 1.31  |
| SVIL      | -4.82  | -1.36 |
| MELK      | -5.17  | -1.82 |
| LOX       | -5.24  | 1.34  |
| LPL       | -5.24  | 1.30  |
| SNAI2     | -5.39  | 1.64  |
| CHRNA9    | -5.46  | -1.36 |
| KCNK10    | -5.50  | 1.31  |
| PRKCB1    | -6.28  | 1.70  |
| PCDH20    | -6.32  | 2.17  |
| KCNJ2     | -6.59  | -2.06 |
| SYT6      | -6.59  | -1.40 |
| NETO1     | -6.63  | 1.79  |
| GEM       | -7.67  | 1.58  |
| STS-1     | -7.78  | 1.37  |
| SPRY4     | -9.25  | 1.37  |
| HOMER2    | -10.13 | 1.61  |
| LOC285016 | -11.08 | -1.53 |
| MAMDC2    | -23.75 | -1.40 |

\*Johnson et al., 2009

**Supplementary Table 5**  
**Module Characterization**

| Module      | Timepoint PC | Function PC Winden et al.                                | Pvalue Winden | Function PC Oldham et al.           | Pvalue Oldham |
|-------------|--------------|----------------------------------------------------------|---------------|-------------------------------------|---------------|
| Black       | 2->4         | glutamatergic neurons; presynaptic fraction              | 2.72E-02      | oligodendrocytes; GABAergic neurons | 1.19E-07      |
| Blue        | 0->8         | glutamatergic neurons; presynaptic fraction              | 2.74E-02      | oligodendrocytes; GABAergic neurons | 1.10E-04      |
| Brown       | n/a          |                                                          |               |                                     |               |
| Cyan        | n/a          |                                                          |               |                                     |               |
| Darkcyan    | n/a          |                                                          |               |                                     |               |
| Darkmagenta | 0            | glutamatergic neurons; presynaptic fraction              | 1.35E-02      | astrocytes; GABAergic neurons       | 5.93E-05      |
| Gold4       | n/a          |                                                          |               |                                     |               |
| Green       | 2            |                                                          |               | astrocytes; GABAergic neurons       | 3.80E-09      |
| Hotpink     | 2->4         |                                                          |               |                                     |               |
| Magenta     | n/a          |                                                          |               |                                     |               |
| Navy        | 2->4         |                                                          |               | oligodendrocytes; GABAergic neurons | 2.90E-06      |
| Orange      | n/a          |                                                          |               |                                     |               |
| Pink        | 0->8         |                                                          |               | oligodendrocytes; GABAergic neurons | 5.37E-24      |
| Purple      | n/a          |                                                          |               |                                     |               |
| Red         | n/a          |                                                          |               |                                     |               |
| Royalblue   | 0            | glutamatergic neurons; presynaptic fraction              | 4.48E-02      | oligodendrocytes; GABAergic neurons | 7.82E-19      |
| Salmon      | 0->8         |                                                          |               | astrocytes; GABAergic neurons       | 1.18E-06      |
| Seagreen    | 8            |                                                          |               |                                     |               |
| Skyblue     | 0->8         | LGN interneurons; nucleus                                | 7.29E-03      | neurons; synaptic proteins          | 6.13E-06      |
| Tan         | 0            |                                                          |               |                                     |               |
| Turquoise   | 2->4         |                                                          |               | oligodendrocytes; GABAergic neurons | 2.54E-08      |
| Yellow      | 0            | basolateral amygdala and layers V & VI pyramidal neurons | 1.46E-02      | astrocytes; GABAergic neurons       | 7.68E-04      |

PC=principle component or eigengene

Winden et al., 2009, Molecular Systems Biology

Oldham et al., 2008, Nature Neuroscience

## Supplementary Table 6

## WGCNA gene membership and information

| Gene_Symbol      | Trx_Name     | SNP        | SNP_P_value | Module | scaled_kWithin | Disease |
|------------------|--------------|------------|-------------|--------|----------------|---------|
| <i>ADAMTSL2</i>  | NM_014694    | rs895596   | 1.82E-02    | black  | 0.39790        |         |
| <i>ADC</i>       | NM_052998    | rs1187061  | 9.45E-03    | black  | 0.60083        |         |
| <i>ADM</i>       | NM_001124    | rs2900384  | 2.35E-02    | black  | 0.71760        |         |
| <i>AKAP12</i>    | NM_005100    | rs7781309  | 1.39E-02    | black  | 0.37963        |         |
| <i>AKR1C2</i>    | NM_001354    | rs4765803  | 4.53E-04    | black  | 0.81571        |         |
| <i>ALAD</i>      | NM_001003945 | NA         | NA          | black  | 0.81003        |         |
| <i>ALDOC</i>     | NM_005165    | rs9393495  | 2.01E-03    | black  | 0.69557        |         |
| <i>ANGPT1</i>    | NM_001146    | rs7610766  | 6.88E-04    | black  | 0.69471        |         |
| <i>ANKRD25</i>   | NM_015493    | NA         | NA          | black  | 0.55261        |         |
| <i>ANKRD37</i>   | NM_181726    | rs6444054  | 1.13E-02    | black  | 0.62694        |         |
| <i>ANXA2</i>     | NM_001002857 | rs10515989 | 6.29E-03    | black  | 0.93190        |         |
| <i>ARG2</i>      | NM_001172    | rs9911654  | 6.65E-04    | black  | 0.52621        |         |
| <i>ARHGEF3</i>   | NM_019555    | rs9537662  | 3.67E-03    | black  | 0.90771        |         |
| <i>ARHGEF7</i>   | NM_003899    | rs3797755  | 5.65E-03    | black  | 0.43284        |         |
| <i>ARPC1B</i>    | NM_005720    | rs3851623  | 5.05E-03    | black  | 0.63802        |         |
| <i>ARSF</i>      | NM_004042    | NA         | NA          | black  | 0.68115        |         |
| <i>ASB7</i>      | NM_024708    | rs992708   | 1.48E-02    | black  | 0.15218        |         |
| <i>ATG16L1</i>   | NM_030803    | rs7555113  | 5.25E-02    | black  | 0.60602        |         |
| <i>ATP6V0A2</i>  | NM_012463    | rs11199716 | 9.71E-03    | black  | 0.75241        |         |
| <i>AXUD1</i>     | NM_033027    | NA         | NA          | black  | 0.74439        |         |
| <i>BBS12</i>     | NM_152618    | rs11711456 | 3.29E-03    | black  | 0.65128        |         |
| <i>BCL2L12</i>   | NM_001040668 | rs2012146  | 5.82E-03    | black  | 0.85138        |         |
| <i>BCL2L12</i>   | NM_052842    | NA         | NA          | black  | 0.82988        |         |
| <i>BDNF</i>      | NM_001709    | rs7171078  | 2.53E-02    | black  | 0.96617        |         |
| <i>BHLHB3</i>    | NM_030762    | NA         | NA          | black  | 0.49353        |         |
| <i>BOK</i>       | NM_032515    | rs524489   | 2.87E-01    | black  | 0.53842        |         |
| <i>C10orf26</i>  | NM_017787    | rs985453   | 8.93E-03    | black  | 0.68381        |         |
| <i>C14orf152</i> | NM_138344    | NA         | NA          | black  | 0.78771        |         |
| <i>C1orf115</i>  | NM_024709    | rs364360   | 2.49E-01    | black  | 0.67889        |         |
| <i>C1orf190</i>  | NM_001013615 | rs1374748  | 2.16E-03    | black  | 0.46016        |         |
| <i>C20orf177</i> | NM_022106    | rs11720285 | 3.84E-02    | black  | 0.78579        |         |
| <i>C20orf19</i>  | NM_018474    | NA         | NA          | black  | 0.11937        |         |
| <i>C20orf39</i>  | NM_024893    | NA         | NA          | black  | 0.74457        |         |
| <i>C2orf32</i>   | NM_015463    | NA         | NA          | black  | 0.77305        |         |
| <i>C3orf34</i>   | NM_032898    | rs788008   | 8.53E-02    | black  | 0.40047        |         |
| <i>C5orf4</i>    | NM_032385    | rs713119   | 8.01E-03    | black  | 0.70175        |         |
| <i>C6orf148</i>  | NM_030568    | NA         | NA          | black  | 0.73956        |         |
| <i>C6orf165</i>  | NM_001031743 | rs2519908  | 4.33E-03    | black  | 0.42990        |         |
| <i>C6orf165</i>  | NM_178823    | NA         | NA          | black  | 0.41909        |         |
| <i>C6orf35</i>   | NM_018452    | NA         | NA          | black  | 0.43184        |         |
| <i>C9orf91</i>   | NM_153045    | rs1544155  | 1.48E-04    | black  | 0.50490        |         |
| <i>CABC1</i>     | NM_020247    | NA         | NA          | black  | 0.31965        |         |
| <i>CACNA2D3</i>  | NM_018398    | rs1498821  | 3.94E-04    | black  | 0.35246        |         |
| <i>CACNB3</i>    | NM_000725    | rs12591300 | 7.52E-03    | black  | 0.63061        |         |
| <i>CACNG5</i>    | NM_014404    | rs2983452  | 5.33E-03    | black  | 0.32036        |         |

Supplementary Table 6

|                      |              |            |          |       |         |
|----------------------|--------------|------------|----------|-------|---------|
| <i>CAMK2G</i>        | NM_172172    | NA         | NA       | black | 0.73765 |
| <i>CAV1</i>          | NM_001753    | rs763229   | 6.19E-04 | black | 0.74967 |
| <i>CAV2</i>          | NM_001233    | rs4978567  | 4.01E-03 | black | 0.38991 |
| <i>CBLN1</i>         | NM_004352    | rs2352593  | 7.87E-03 | black | 0.47980 |
| <i>CBLN4</i>         | NM_080617    | rs7955088  | 1.31E-02 | black | 0.81301 |
| <i>CCM2</i>          | NM_031443    | rs6066149  | 2.75E-03 | black | 0.57539 |
| <i>CCND1</i>         | NM_053056    | rs11814376 | 4.27E-04 | black | 0.85494 |
| <i>CCNG2</i>         | NM_004354    | rs3808902  | 9.90E-03 | black | 0.65991 |
| <i>CCR10</i>         | NM_016602    | rs12164905 | 7.41E-03 | black | 0.71636 |
| <i>CCRN4L</i>        | NM_012118    | rs16910093 | 1.87E-02 | black | 0.84626 |
| <i>CD200</i>         | NM_001004196 | rs4608128  | 3.36E-03 | black | 0.92375 |
| <i>CD74</i>          | NM_001025159 | rs11797944 | 7.37E-03 | black | 0.62933 |
| <i>CDCA4</i>         | NM_017955    | rs3924892  | 1.64E-02 | black | 0.78044 |
| <i>CDKN1B</i>        | NM_004064    | rs1326800  | 7.69E-03 | black | 0.13909 |
| <i>CDKN2B</i>        | NM_078487    | rs7954180  | 7.51E-03 | black | 0.54227 |
| <i>CDR2</i>          | NM_001802    | rs2473322  | 3.38E-03 | black | 0.91549 |
| <i>CHN2</i>          | NM_004067    | rs1958979  | 1.19E-03 | black | 0.60668 |
| <i>CHRNA9</i>        | NM_017581    | rs16869484 | 1.46E-02 | black | 0.90792 |
| <i>CHRNB1</i>        | NM_000747    | rs6463669  | 3.78E-03 | black | 0.78392 |
| <i>CITED2</i>        | NM_006079    | rs6954902  | 1.26E-02 | black | 0.46389 |
| <i>CNN2</i>          | NM_004368    | rs4816153  | 1.13E-02 | black | 0.77974 |
| <i>CNN2</i>          | NM_201277    | rs4816153  | 1.13E-02 | black | 0.62131 |
| <i>CNNM4</i>         | NM_020184    | rs9297966  | 4.90E-03 | black | 0.59099 |
| <i>COL18A1</i>       | NM_030582    | rs6429566  | 4.80E-03 | black | 0.61215 |
| <i>CREB5</i>         | NM_182898    | rs9579284  | 1.02E-04 | black | 0.16032 |
| <i>CREB5</i>         | NM_001011666 | rs11840398 | 1.32E-03 | black | 0.21159 |
| <i>CRH</i>           | NM_000756    | rs10996684 | 9.43E-03 | black | 0.48478 |
| <i>CX3CL1</i>        | NM_002996    | rs11004346 | 1.36E-02 | black | 0.67321 |
| <i>CXCL14</i>        | NM_004887    | rs6430516  | 3.38E-02 | black | 0.64179 |
| <i>CXCR4</i>         | NM_001008540 | rs322240   | 4.82E-02 | black | 0.47965 |
| <i>CXorf6</i>        | NM_005491    | NA         | NA       | black | 0.43242 |
| <i>CYTL1</i>         | NM_018659    | rs4765803  | 4.53E-04 | black | 0.28745 |
| <i>DBP</i>           | NM_001352    | rs258596   | 1.49E-02 | black | 0.62381 |
| <i>DDIT4L</i>        | NM_145244    | rs11765661 | 5.04E-03 | black | 0.84241 |
| <i>DDX21</i>         | NM_004728    | rs1494797  | 3.86E-03 | black | 0.86332 |
| <i>DDX31</i>         | NM_022779    | rs4645436  | 2.58E-03 | black | 0.32767 |
| <i>DHX34</i>         | NM_194428    | NA         | NA       | black | 0.51764 |
| <i>DIAPH1</i>        | NM_005219    | rs12641953 | 4.40E-05 | black | 0.44843 |
| <i>DIXDC1</i>        | NM_001037954 | rs4627009  | 4.46E-03 | black | 0.66224 |
| <i>DKFZP586H2123</i> | NM_001001991 | NA         | NA       | black | 0.68789 |
| <i>DNM3</i>          | NM_015569    | rs1488109  | 2.25E-03 | black | 0.43981 |
| <i>DSCR1</i>         | NM_203417    | NA         | NA       | black | 0.44562 |
| <i>DSCR1</i>         | NM_203418    | NA         | NA       | black | 0.36776 |
| <i>DUSP4</i>         | NM_001394    | rs6518702  | 3.87E-02 | black | 0.35955 |
| <i>DUSP5</i>         | NM_004419    | rs4907726  | 1.79E-02 | black | 0.57209 |
| <i>DUSP6</i>         | NM_001946    | rs17164472 | 1.47E-03 | black | 0.43539 |
| <i>DUSP6</i>         | NM_022652    | rs17164472 | 1.47E-03 | black | 0.39151 |
| <i>DYNC111</i>       | NM_004411    | rs6834248  | 4.90E-03 | black | 0.61115 |
| <i>DYRK1B</i>        | NM_004714    | rs6066149  | 2.75E-03 | black | 0.23194 |

Supplementary Table 6

|                 |              |            |          |       |         |        |
|-----------------|--------------|------------|----------|-------|---------|--------|
| <i>E2F3</i>     | NM_001949    | rs9295471  | 1.55E-03 | black | 0.88919 |        |
| <i>EDG1</i>     | NM_001400    | NA         | NA       | black | 0.80080 |        |
| <i>EFHD2</i>    | NM_024329    | rs4416821  | 2.73E-03 | black | 0.78241 |        |
| <i>EHD4</i>     | NM_139265    | rs954017   | 3.03E-03 | black | 0.97661 |        |
| <i>EML4</i>     | NM_019063    | rs1359186  | 5.54E-03 | black | 0.62994 |        |
| <i>EPHA2</i>    | NM_004431    | rs10508507 | 1.28E-03 | black | 0.64624 |        |
| <i>EPHA5</i>    | NM_004439    | rs6730703  | 5.70E-03 | black | 0.68562 |        |
| <i>EPHB3</i>    | NM_004443    | rs11720282 | 6.60E-02 | black | 0.79670 |        |
| <i>ERF</i>      | NM_006494    | rs6458566  | 4.20E-03 | black | 0.52248 |        |
| <i>ERRF1</i>    | NM_018948    | rs2149111  | 1.36E-02 | black | 0.98454 |        |
| <i>ETV5</i>     | NM_004454    | rs6777779  | 9.97E-03 | black | 0.77992 |        |
| <i>ETV5</i>     | NM_004454    | rs6777779  | 9.97E-03 | black | 0.95173 |        |
| <i>EYA3</i>     | NM_172098    | NA         | NA       | black | 0.53966 |        |
| <i>FAM105B</i>  | NM_138348    | rs12601076 | 5.77E-03 | black | 0.87604 |        |
| <i>FAM123A</i>  | NM_199138    | rs10054106 | 4.55E-03 | black | 0.62204 |        |
| <i>FAM130A2</i> | NM_024969    | NA         | NA       | black | 0.94624 |        |
| <i>FAM38A</i>   | NM_014745    | NA         | NA       | black | 0.88432 |        |
| <i>FAM43B</i>   | NM_207334    | rs966864   | 9.07E-04 | black | 0.79913 |        |
| <i>FAM5B</i>    | NM_021165    | rs1402641  | 4.72E-02 | black | 0.66965 |        |
| <i>FAP</i>      | NM_004460    | rs1338626  | 5.66E-02 | black | 0.59152 |        |
| <i>FKBP5</i>    | NM_004117    | rs12053698 | 8.68E-04 | black | 0.90230 |        |
| <i>FLJ22374</i> | NM_032222    | NA         | NA       | black | 0.55191 |        |
| <i>FLJ23514</i> | NM_021827    | NA         | NA       | black | 0.32464 |        |
| <i>FLJ23584</i> | NM_024588    | NA         | NA       | black | 0.66038 |        |
| <i>FLJ33790</i> | NM_173583    | NA         | NA       | black | 0.77745 |        |
| <i>FLJ38159</i> | NM_152723    | NA         | NA       | black | 0.23553 |        |
| <i>FLJ40852</i> | NM_173677    | NA         | NA       | black | 0.37278 |        |
| <i>FLNC</i>     | NM_001458    | rs4759808  | 2.03E-02 | black | 0.74371 |        |
| <i>FLRT3</i>    | NM_013281    | rs727668   | 1.24E-03 | black | 0.51601 |        |
| <i>FOXJ1</i>    | NM_001454    | rs2035921  | 1.01E-03 | black | 0.81450 |        |
| <i>FRAT1</i>    | NM_181355    | NA         | NA       | black | 0.35135 |        |
| <i>FRMD4A</i>   | NM_018027    | rs11023030 | 1.12E-03 | black | 0.85120 |        |
| <i>FRMD6</i>    | NM_152330    | rs9535757  | 1.13E-02 | black | 0.44450 |        |
| <i>FSIP1</i>    | NM_152597    | rs13302352 | 2.28E-04 | black | 0.65700 |        |
| <i>Gcom1</i>    | NM_001018100 | rs159076   | 9.14E-04 | black | 0.69086 |        |
| <i>Gcom1</i>    | NM_001018096 | NA         | NA       | black | 0.84593 |        |
| <i>GEM</i>      | NM_005261    | rs2623167  | 1.53E-02 | black | 0.64671 |        |
| <i>GEM</i>      | NM_181702    | rs2623167  | 1.53E-02 | black | 0.84589 |        |
| <i>GLCCI1</i>   | NM_138426    | rs16879418 | 7.85E-03 | black | 0.17727 |        |
| <i>GLRA2</i>    | NM_002063    | NA         | NA       | black | 0.83700 | autism |
| <i>GNAO1</i>    | NM_138736    | rs930185   | 4.24E-03 | black | 0.70622 |        |
| <i>GPR23</i>    | NM_005296    | NA         | NA       | black | 0.75904 |        |
| <i>GPR3</i>     | NM_005281    | rs929620   | 1.23E-02 | black | 0.79864 |        |
| <i>GPR88</i>    | NM_022049    | rs1491241  | 1.07E-02 | black | 0.88613 |        |
| <i>GRAMD3</i>   | NM_023927    | rs7011543  | 1.77E-03 | black | 0.90834 |        |
| <i>GRB10</i>    | NM_005311    | rs6097043  | 9.55E-04 | black | 0.42037 |        |
| <i>GRB10</i>    | NM_005311    | rs6097043  | 9.55E-04 | black | 0.49545 |        |
| <i>GRK5</i>     | NM_005308    | rs7923896  | 2.73E-03 | black | 0.55865 |        |
| <i>GUCY1A3</i>  | NM_000856    | rs9870721  | 5.19E-03 | black | 0.61248 |        |

Supplementary Table 6

|                   |              |            |          |       |         |
|-------------------|--------------|------------|----------|-------|---------|
| <i>HIST1H4E</i>   | NM_003545    | rs2830008  | 1.25E-02 | black | 0.37668 |
| <i>HLA-DMA</i>    | NM_006120    | rs6989877  | 5.20E-03 | black | 0.60352 |
| <i>HLA-DQA</i>    | NM_002119    | rs4799438  | 1.08E-02 | black | 0.27778 |
| <i>HLA-DPA1</i>   | NM_033554    | rs611473   | 1.14E-02 | black | 0.76580 |
| <i>HLA-DPB1</i>   | NM_002121    | rs11082000 | 4.56E-03 | black | 0.63221 |
| <i>HLA-DQA1</i>   | XM_936120    | NA         | NA       | black | 0.82200 |
| <i>HLA-DRB4</i>   | NM_021983    | NA         | NA       | black | 0.17812 |
| <i>HMGA1</i>      | NM_145899    | rs2009681  | 2.07E-02 | black | 0.77914 |
| <i>HMGCR</i>      | NM_000859    | rs274580   | 1.75E-02 | black | 0.62126 |
| <i>HMP19</i>      | NM_015980    | rs2676511  | 2.73E-02 | black | 0.81312 |
| <i>HRIHFB2122</i> | NM_138632    | rs752775   | 3.98E-03 | black | 0.51537 |
| <i>HRIHFB2122</i> | NM_138632    | rs752775   | 3.98E-03 | black | 0.30993 |
| <i>HRK</i>        | NM_003806    | rs4596520  | 6.29E-03 | black | 0.84254 |
| <i>HSPA1L</i>     | NM_005527    | rs905836   | 8.09E-04 | black | 0.76168 |
| <i>HSPA2</i>      | NM_021979    | rs7625805  | 1.72E-02 | black | 0.39377 |
| <i>HSPB8</i>      | NM_014365    | rs735620   | 9.35E-03 | black | 0.74710 |
| <i>HSPC111</i>    | NM_016391    | NA         | NA       | black | 0.75033 |
| <i>IFIT1</i>      | NM_001548    | rs3763616  | 4.70E-04 | black | 0.75501 |
| <i>IFIT2</i>      | NM_001547    | rs1957082  | 2.29E-02 | black | 0.91221 |
| <i>IL11</i>       | NM_000641    | rs10877757 | 1.56E-02 | black | 0.81234 |
| <i>IL27RA</i>     | NM_004843    | rs11718142 | 1.16E-02 | black | 0.55059 |
| <i>INA</i>        | NM_032727    | rs12370774 | 3.07E-02 | black | 0.71610 |
| <i>INSIG1</i>     | NM_198336    | rs2862073  | 9.57E-04 | black | 0.26491 |
| <i>IQCA</i>       | NM_024726    | NA         | NA       | black | 0.23872 |
| <i>IRAK2</i>      | NM_001570    | rs11249984 | 8.36E-04 | black | 0.80002 |
| <i>ITGA7</i>      | NM_002206    | rs1498821  | 3.94E-04 | black | 0.44741 |
| <i>ITPKB</i>      | NM_002221    | rs708777   | 3.78E-02 | black | 0.50525 |
| <i>JAG1</i>       | NM_000214    | rs7965052  | 1.41E-03 | black | 0.95264 |
| <i>JUN</i>        | NM_002228    | rs2037458  | 2.07E-03 | black | 0.92704 |
| <i>JUP</i>        | NM_021991    | rs9306949  | 1.63E-03 | black | 0.79176 |
| <i>KARCA1</i>     | NM_152366    | NA         | NA       | black | 0.66482 |
| <i>KCNA5</i>      | NM_002234    | rs11908536 | 2.51E-03 | black | 0.39037 |
| <i>KCNF1</i>      | NM_002236    | rs17365678 | 5.36E-03 | black | 0.73267 |
| <i>KCNJ2</i>      | NM_000891    | rs8066863  | 3.20E-03 | black | 0.95383 |
| <i>KCNJ8</i>      | NM_004982    | rs13152723 | 5.15E-03 | black | 0.83926 |
| <i>KCTD9</i>      | NM_017634    | rs1544369  | 5.45E-03 | black | 0.74965 |
| <i>KIAA0020</i>   | NM_014878    | rs956764   | 2.69E-03 | black | 0.79235 |
| <i>KIAA0240</i>   | NM_015349    | rs1981008  | 4.49E-03 | black | 0.55935 |
| <i>KIAA0286</i>   | NM_015257    | NA         | NA       | black | 0.54065 |
| <i>KIAA1543</i>   | NM_001080429 | rs12445659 | 1.28E-03 | black | 0.20691 |
| <i>KIAA1543</i>   | XM_048362    | NA         | NA       | black | 0.40535 |
| <i>KIAA1559</i>   | NM_020917    | NA         | NA       | black | 0.47555 |
| <i>KIAA1598</i>   | NM_018330    | rs2782209  | 2.02E-03 | black | 0.77323 |
| <i>KIAA1754</i>   | NM_033397    | NA         | NA       | black | 0.89494 |
| <i>KIAA1853</i>   | NM_194286    | NA         | NA       | black | 0.92280 |
| <i>KIT</i>        | NM_000222    | rs1461796  | 1.11E-03 | black | 0.21376 |
| <i>L1CAM</i>      | NM_000425    | NA         | NA       | black | 0.33335 |
| <i>LAMC1</i>      | NM_002293    | rs1863151  | 6.70E-04 | black | 0.65666 |
| <i>LDLR</i>       | NM_000527    | rs10733219 | 3.82E-03 | black | 0.98441 |



Supplementary Table 6

|                  |              |            |          |       |         |        |
|------------------|--------------|------------|----------|-------|---------|--------|
| <i>LEF1</i>      | NM_016269    | rs1327470  | 1.65E-03 | black | 0.72078 |        |
| <i>LETMD1</i>    | NM_015416    | rs9296619  | 1.78E-02 | black | 0.51458 |        |
| <i>LIMS1</i>     | NM_004987    | rs537111   | 5.40E-05 | black | 0.86916 |        |
| <i>LINCR</i>     | NM_001080535 | NA         | NA       | black | 0.38106 |        |
| <i>LMNA</i>      | NM_005572    | rs1294092  | 2.59E-02 | black | 0.82680 |        |
| <i>LMNA</i>      | NM_005572    | rs1294092  | 2.59E-02 | black | 0.89245 |        |
| <i>LOC112703</i> | NM_138411    | NA         | NA       | black | 0.67832 |        |
| <i>LOC124751</i> | NM_213597    | NA         | NA       | black | 0.29839 |        |
| <i>LOC283537</i> | NM_181785    | NA         | NA       | black | 0.51836 |        |
| <i>LOC57228</i>  | NM_001031628 | NA         | NA       | black | 0.88141 |        |
| <i>LOC57228</i>  | NM_001031628 | NA         | NA       | black | 0.66553 |        |
| <i>LOC653170</i> | XM_926321    | NA         | NA       | black | 0.89267 |        |
| <i>LOC81558</i>  | NM_030802    | NA         | NA       | black | 0.24831 |        |
| <i>LOC91461</i>  | NM_138370    | NA         | NA       | black | 0.76941 |        |
| <i>LOC92270</i>  | NM_001017971 | NA         | NA       | black | 0.43926 |        |
| <i>LONRF2</i>    | NM_198461    | rs12428596 | 6.52E-03 | black | 0.70676 |        |
| <i>LPPR4</i>     | NM_014839    | rs10509714 | 1.22E-03 | black | 0.58815 |        |
| <i>LRCH2</i>     | NM_020871    | NA         | NA       | black | 0.69941 |        |
| <i>LRFN2</i>     | NM_020737    | rs764444   | 9.46E-04 | black | 0.74115 |        |
| <i>LRRC3B</i>    | NM_052953    | rs219667   | 3.51E-03 | black | 1.00000 |        |
| <i>LRRCC1</i>    | NM_033402    | rs1560977  | 1.01E-02 | black | 0.81020 |        |
| <i>LRRN5</i>     | NM_006338    | NA         | NA       | black | 0.72730 |        |
| <i>LRRTM2</i>    | NM_015564    | rs176382   | 1.20E-02 | black | 0.25532 |        |
| <i>LSM10</i>     | NM_032881    | rs2835340  | 1.71E-02 | black | 0.71134 |        |
| <i>LZTS1</i>     | NM_021020    | rs675465   | 4.63E-04 | black | 0.35223 |        |
| <i>MAOA</i>      | NM_000240    | NA         | NA       | black | 0.36439 | autism |
| <i>MAP3K4</i>    | NM_006724    | rs6678820  | 2.27E-02 | black | 0.70529 |        |
| <i>MAPK8IP1</i>  | NM_005456    | rs2428684  | 4.57E-03 | black | 0.54782 |        |
| <i>MAPK8IP2</i>  | NM_012324    | rs2217167  | 5.31E-03 | black | 0.32321 |        |
| <i>METTL1</i>    | NM_005371    | rs12586157 | 1.48E-03 | black | 0.69149 |        |
| <i>METTL7B</i>   | NM_152637    | rs1498821  | 3.94E-04 | black | 0.79018 |        |
| <i>MFAP3L</i>    | NM_021647    | rs10930434 | 2.03E-02 | black | 0.20836 |        |
| <i>MGC17330</i>  | NM_052880    | NA         | NA       | black | 0.95550 |        |
| <i>MGC33584</i>  | NM_173680    | NA         | NA       | black | 0.67088 |        |
| <i>MGC42105</i>  | NM_153361    | rs8140396  | 3.46E-03 | black | 0.87153 |        |
| <i>MGC4677</i>   | NM_052871    | NA         | NA       | black | 0.91155 |        |
| <i>MGP</i>       | NM_000900    | rs4140562  | 3.43E-02 | black | 0.82739 |        |
| <i>MICAL-L2</i>  | NM_182924    | NA         | NA       | black | 0.31111 |        |
| <i>MORN3</i>     | NM_173855    | rs943259   | 5.76E-02 | black | 0.11178 |        |
| <i>MRFAP1L1</i>  | NM_203462    | rs8102571  | 2.19E-02 | black | 0.33472 |        |
| <i>MRPS12</i>    | NM_021107    | rs2297198  | 4.00E-03 | black | 0.44453 |        |
| <i>MSI2</i>      | NM_170721    | rs4687554  | 2.45E-03 | black | 0.86565 |        |
| <i>MSRB3</i>     | NM_198080    | rs696014   | 5.31E-03 | black | 0.31710 |        |
| <i>MSRB3</i>     | NM_198080    | rs696014   | 5.31E-03 | black | 0.29955 |        |
| <i>MTP18</i>     | NM_001003704 | NA         | NA       | black | 0.71499 |        |
| <i>MTP18</i>     | NM_016498    | NA         | NA       | black | 0.88830 |        |
| <i>MTP18</i>     | NM_016498    | NA         | NA       | black | 0.77240 |        |
| <i>MTUS1</i>     | NM_001001924 | rs4504735  | 1.34E-03 | black | 0.84298 |        |
| <i>MTUS1</i>     | NM_001001931 | rs4504735  | 1.34E-03 | black | 0.92078 |        |

Supplementary Table 6

|                  |              |            |          |       |         |        |
|------------------|--------------|------------|----------|-------|---------|--------|
| <i>MXI1</i>      | NM_001008541 | rs11613438 | 6.58E-03 | black | 0.91696 |        |
| <i>MXI1</i>      | NM_130439    | rs11613438 | 6.58E-03 | black | 0.74180 |        |
| <i>MYBPC1</i>    | NM_002465    | rs1567663  | 1.52E-03 | black | 0.42447 |        |
| <i>MYO1E</i>     | NM_004998    | rs10783915 | 5.19E-04 | black | 0.30689 |        |
| <i>MYO9B</i>     | NM_004145    | rs2959618  | 1.92E-03 | black | 0.68072 |        |
| <i>NBLA10383</i> | NM_173622    | NA         | NA       | black | 0.81987 |        |
| <i>NEDD4</i>     | NM_198400    | rs12582022 | 5.55E-03 | black | 0.79209 |        |
| <i>NEDD9</i>     | NM_182966    | rs2242451  | 3.01E-03 | black | 0.30338 |        |
| <i>NIP7</i>      | NM_016101    | rs1391111  | 4.68E-02 | black | 0.74403 |        |
| <i>NKD2</i>      | NM_033120    | rs789029   | 4.51E-03 | black | 0.16883 |        |
| <i>NMB</i>       | NM_021077    | rs1966850  | 1.93E-02 | black | 0.70181 |        |
| <i>NOL4</i>      | NM_003787    | rs2394180  | 9.99E-04 | black | 0.63758 |        |
| <i>NOL9</i>      | NM_024654    | rs348384   | 1.79E-02 | black | 0.14868 |        |
| <i>NOVA1</i>     | NM_006491    | rs4307059  | 1.07E-05 | black | 0.87491 |        |
| <i>NRG1</i>      | NM_013961    | NA         | NA       | black | 0.72100 |        |
| <i>NRXN1</i>     | NM_004801    | rs17504439 | 7.67E-04 | black | 0.65934 | autism |
| <i>NUPR1</i>     | NM_001042483 | rs1331894  | 6.96E-04 | black | 0.43173 |        |
| <i>NY-SAR-48</i> | NM_001011699 | NA         | NA       | black | 0.51994 |        |
| <i>OCIAD2</i>    | NM_001014446 | rs2255532  | 1.51E-03 | black | 0.74377 |        |
| <i>OGFRL1</i>    | NM_024576    | rs8094564  | 4.67E-02 | black | 0.60840 |        |
| <i>OSAP</i>      | NM_032623    | NA         | NA       | black | 0.25809 |        |
| <i>P8</i>        | NM_012385    | rs1331894  | 6.96E-04 | black | 0.49715 |        |
| <i>PAG1</i>      | NM_018440    | rs1034783  | 3.16E-03 | black | 0.55124 |        |
| <i>PAK7</i>      | NM_020341    | rs17439103 | 2.79E-04 | black | 0.81257 |        |
| <i>PANX2</i>     | NM_052839    | rs2215361  | 1.39E-02 | black | 0.65836 |        |
| <i>PCDH19</i>    | NM_020766    | NA         | NA       | black | 0.55607 | autism |
| <i>PCDHGC3</i>   | NM_032402    | rs9838798  | 1.08E-02 | black | 0.35212 |        |
| <i>PCGF6</i>     | NM_001011663 | rs4946582  | 3.63E-03 | black | 0.36198 |        |
| <i>PCMTD1</i>    | NM_052937    | rs2336669  | 3.20E-03 | black | 0.60436 |        |
| <i>PDZRN3</i>    | NM_015009    | rs10879852 | 1.42E-03 | black | 0.57768 |        |
| <i>PDZRN3</i>    | NM_015009    | rs10879852 | 1.42E-03 | black | 0.21198 |        |
| <i>PDZRN4</i>    | NM_013377    | rs3783167  | 2.13E-04 | black | 0.81455 |        |
| <i>PHACTR3</i>   | NM_080672    | rs11852448 | 1.04E-03 | black | 0.83681 |        |
| <i>PHACTR3</i>   | NM_183246    | rs10401904 | 6.68E-03 | black | 0.73432 |        |
| <i>PHLDA1</i>    | NM_007350    | rs1374879  | 1.14E-02 | black | 0.88631 |        |
| <i>PI4KII</i>    | NM_018425    | NA         | NA       | black | 0.44871 |        |
| <i>PIM3</i>      | NM_001001852 | rs9591249  | 1.63E-02 | black | 0.21838 |        |
| <i>PKIA</i>      | NM_006823    | rs7720696  | 1.03E-02 | black | 0.80714 |        |
| <i>PKIA</i>      | NM_006823    | rs7720696  | 1.03E-02 | black | 0.49965 |        |
| <i>PKIA</i>      | NM_181839    | rs7720696  | 1.03E-02 | black | 0.78172 |        |
| <i>PLCH2</i>     | NM_014638    | rs11715813 | 1.90E-02 | black | 0.55799 |        |
| <i>PLEKHF1</i>   | NM_024310    | rs2251817  | 1.86E-03 | black | 0.32951 |        |
| <i>PLEKHG2</i>   | NM_022835    | rs85021    | 7.05E-03 | black | 0.57054 |        |
| <i>PPAN</i>      | NM_020230    | rs4073397  | 9.05E-03 | black | 0.72583 |        |
| <i>PPRC1</i>     | NM_015062    | rs2399931  | 4.14E-03 | black | 0.75721 |        |
| <i>PRDM2</i>     | NM_012231    | rs11023030 | 1.12E-03 | black | 0.46760 |        |
| <i>PRKAB2</i>    | NM_005399    | rs1354496  | 1.60E-02 | black | 0.61902 |        |
| <i>PRKAG2</i>    | NM_001040633 | rs4725434  | 9.55E-04 | black | 0.24054 |        |
| <i>PRKCD</i>     | NM_212539    | rs723615   | 2.50E-02 | black | 0.54157 |        |

Supplementary Table 6

|                 |              |            |          |       |         |        |
|-----------------|--------------|------------|----------|-------|---------|--------|
| <i>PRKCZ</i>    | NM_002744    | rs2108636  | 3.73E-03 | black | 0.73684 |        |
| <i>PRRT1</i>    | NM_030651    | rs1531746  | 2.37E-02 | black | 0.25465 |        |
| <i>PTHLH</i>    | NM_198965    | rs2815545  | 8.15E-03 | black | 0.93501 |        |
| <i>PTHLH</i>    | NM_198966    | rs2815545  | 8.15E-03 | black | 0.39843 |        |
| <i>PTPN9</i>    | NM_002833    | rs10879852 | 1.42E-03 | black | 0.24493 |        |
| <i>PTPN9</i>    | NM_002833    | rs10879852 | 1.42E-03 | black | 0.76145 |        |
| <i>PTPRR</i>    | NM_002849    | rs17087818 | 2.83E-05 | black | 0.81208 |        |
| <i>PTRF</i>     | NM_012232    | rs6733157  | 1.89E-02 | black | 0.84174 |        |
| <i>PTRH2</i>    | NM_016077    | rs7738215  | 1.15E-02 | black | 0.61237 |        |
| <i>PUS1</i>     | NM_025215    | rs4863907  | 2.93E-02 | black | 0.76726 |        |
| <i>PUSL1</i>    | NM_153339    | rs4640842  | 1.68E-04 | black | 0.39042 |        |
| <i>RAB20</i>    | NM_017817    | rs7637614  | 1.59E-02 | black | 0.15173 |        |
| <i>RAB30</i>    | NM_014488    | rs17260258 | 5.40E-03 | black | 0.44475 |        |
| <i>RAB34</i>    | NM_031934    | rs7997448  | 2.01E-02 | black | 0.75371 |        |
| <i>RAB37</i>    | NM_175738    | rs10506635 | 4.04E-03 | black | 0.57370 |        |
| <i>RAB3IL1</i>  | NM_013401    | rs1036244  | 6.36E-03 | black | 0.62203 |        |
| <i>RAB7B</i>    | NM_177403    | NA         | NA       | black | 0.57007 |        |
| <i>RAP1GA1</i>  | NM_002885    | NA         | NA       | black | 0.57977 |        |
| <i>RARB</i>     | NM_016152    | rs3783142  | 9.51E-04 | black | 0.68420 |        |
| <i>RBPM2</i>    | NM_194272    | rs2926120  | 5.83E-03 | black | 0.81063 |        |
| <i>RET</i>      | NM_020630    | rs1981008  | 4.49E-03 | black | 0.37417 |        |
| <i>REV3L</i>    | NM_002912    | rs4839130  | 4.78E-03 | black | 0.39962 |        |
| <i>RFX2</i>     | NM_000635    | rs6500756  | 1.34E-03 | black | 0.37143 |        |
| <i>RFXDC2</i>   | NM_022841    | NA         | NA       | black | 0.31208 |        |
| <i>RGMB</i>     | NM_173670    | NA         | NA       | black | 0.68480 |        |
| <i>RGS4</i>     | NM_005613    | rs1922867  | 8.37E-02 | black | 0.95496 |        |
| <i>RIN1</i>     | NM_004292    | rs4883777  | 4.45E-02 | black | 0.43973 |        |
| <i>RIS1</i>     | NM_015444    | NA         | NA       | black | 0.79811 |        |
| <i>RND1</i>     | NM_014470    | rs7324484  | 1.04E-03 | black | 0.55340 |        |
| <i>RPP40</i>    | NM_006638    | rs6422704  | 3.27E-03 | black | 0.85647 |        |
| <i>RPRML</i>    | NM_203400    | rs328142   | 4.80E-03 | black | 0.73187 |        |
| <i>RPS6KA3</i>  | NM_004586    | NA         | NA       | black | 0.65728 |        |
| <i>RRS1</i>     | NM_015169    | rs12327356 | 2.22E-03 | black | 0.97223 |        |
| <i>RUNX1</i>    | NM_001754    | rs2701516  | 1.79E-04 | black | 0.57537 |        |
| <i>RUNX1T1</i>  | NM_175635    | rs10991869 | 6.66E-03 | black | 0.68299 |        |
| <i>RUNX1T1</i>  | NM_175636    | rs10991869 | 6.66E-03 | black | 0.90490 |        |
| <i>S100A6</i>   | NM_014624    | rs9883613  | 3.23E-02 | black | 0.48006 |        |
| <i>SATB2</i>    | NM_015265    | rs2678209  | 2.70E-02 | black | 0.61726 |        |
| <i>SCARA3</i>   | NM_182826    | rs929620   | 1.23E-02 | black | 0.49915 |        |
| <i>SCG2</i>     | NM_003469    | rs10915898 | 6.72E-02 | black | 0.32452 |        |
| <i>SCN2B</i>    | NM_004588    | rs13248744 | 3.38E-02 | black | 0.73094 |        |
| <i>SDCCAG33</i> | NM_005786    | NA         | NA       | black | 0.76536 |        |
| <i>SEH1L</i>    | NM_001013437 | rs11022589 | 9.64E-04 | black | 0.90116 |        |
| <i>SEH1L</i>    | NM_031216    | rs11022589 | 9.64E-04 | black | 0.66410 |        |
| <i>SEH1L</i>    | NM_031216    | rs11022589 | 9.64E-04 | black | 0.29709 |        |
| <i>SEN5</i>     | NM_152699    | rs6806618  | 1.11E-01 | black | 0.34179 |        |
| <i>SERPIN8</i>  | NM_002640    | rs10411879 | 5.55E-04 | black | 0.78221 |        |
| <i>SERPIN8</i>  | NM_001031848 | rs1000574  | 6.08E-03 | black | 0.82262 |        |
| <i>SERPINE1</i> | NM_000602    | rs1151379  | 1.02E-02 | black | 0.83650 | autism |

Supplementary Table 6

|                 |              |            |          |       |         |        |
|-----------------|--------------|------------|----------|-------|---------|--------|
| <i>SESN1</i>    | NM_014454    | rs2962978  | 6.40E-03 | black | 0.80536 |        |
| <i>SETD8</i>    | NM_020382    | rs11218941 | 1.64E-02 | black | 0.75543 |        |
| <i>SGIP1</i>    | NM_032291    | rs11077554 | 5.15E-03 | black | 0.25764 |        |
| <i>SH3MD2</i>   | NM_020870    | NA         | NA       | black | 0.72234 |        |
| <i>SHANK2</i>   | NM_012309    | rs1544442  | 1.08E-03 | black | 0.60045 | autism |
| <i>SLC18A1</i>  | NM_003053    | rs12590446 | 6.77E-04 | black | 0.83068 |        |
| <i>SLC20A1</i>  | NM_005415    | rs4385708  | 2.97E-03 | black | 0.85080 |        |
| <i>SLC25A37</i> | NM_016612    | rs4452416  | 6.48E-03 | black | 0.21290 |        |
| <i>SLC45A3</i>  | NM_033102    | rs7514718  | 1.65E-02 | black | 0.65864 |        |
| <i>SLC7A1</i>   | NM_003045    | rs4893602  | 4.60E-04 | black | 0.91438 |        |
| <i>SMC4</i>     | NM_001002800 | rs1898871  | 4.37E-02 | black | 0.13326 |        |
| <i>SMC4L1</i>   | NM_005496    | rs1898871  | 4.37E-02 | black | 0.37775 |        |
| <i>SNFT</i>     | NM_018664    | NA         | NA       | black | 0.50530 |        |
| <i>SNORD56</i>  | NR_002739    | rs11251328 | 2.33E-03 | black | 0.17213 |        |
| <i>SNTG2</i>    | NM_018968    | rs4640842  | 1.68E-04 | black | 0.45383 |        |
| <i>SOCS1</i>    | NM_003745    | rs596406   | 3.55E-03 | black | 0.46887 |        |
| <i>SORBS1</i>   | NM_015385    | rs2404692  | 1.16E-03 | black | 0.69902 |        |
| <i>SPOCD1</i>   | NM_144569    | rs631108   | 2.14E-03 | black | 0.94081 |        |
| <i>SPRED2</i>   | NM_181784    | rs4581806  | 5.59E-03 | black | 0.82332 |        |
| <i>SPRY1</i>    | NM_005841    | rs7108303  | 2.25E-02 | black | 0.93917 |        |
| <i>SPRY4</i>    | NM_030964    | rs11739594 | 7.96E-03 | black | 0.88854 |        |
| <i>SPSB1</i>    | NM_025106    | rs2271333  | 5.94E-03 | black | 0.77240 |        |
| <i>SREBF1</i>   | NM_004176    | rs11683808 | 5.07E-03 | black | 0.58486 |        |
| <i>SSPN</i>     | NM_005086    | rs198834   | 2.08E-03 | black | 0.36129 |        |
| <i>ST6GAL1</i>  | NM_173217    | rs10471185 | 1.36E-02 | black | 0.37054 |        |
| <i>STARD13</i>  | NM_178006    | rs10136259 | 5.97E-05 | black | 0.37782 |        |
| <i>STK10</i>    | NM_005990    | rs17074425 | 1.92E-02 | black | 0.23577 |        |
| <i>STK17A</i>   | NM_004760    | rs2838281  | 5.13E-04 | black | 0.79008 |        |
| <i>STK24</i>    | NM_001032296 | rs4584121  | 2.77E-03 | black | 0.33797 |        |
| <i>STMN2</i>    | NM_007029    | rs327703   | 2.01E-02 | black | 0.96758 |        |
| <i>STMN4</i>    | NM_030795    | rs9554090  | 6.33E-03 | black | 0.92234 |        |
| <i>SYNJ2</i>    | NM_003898    | rs929779   | 3.80E-03 | black | 0.82837 |        |
| <i>TCF12</i>    | NM_207040    | rs13265893 | 1.02E-02 | black | 0.33388 |        |
| <i>TEKT2</i>    | NM_014466    | rs7220147  | 2.55E-02 | black | 0.32325 |        |
| <i>TESK2</i>    | NM_007170    | rs10493120 | 4.23E-03 | black | 0.17373 |        |
| <i>TGFB2</i>    | NM_003238    | rs17393335 | 1.72E-02 | black | 0.55475 |        |
| <i>TH</i>       | NM_000360    | rs6972752  | 7.25E-03 | black | 0.78380 |        |
| <i>THSD1</i>    | NM_018676    | rs627860   | 1.22E-03 | black | 0.56521 |        |
| <i>THSD1</i>    | NM_199263    | rs627860   | 1.22E-03 | black | 0.76599 |        |
| <i>TMEM22</i>   | NM_025246    | rs10496773 | 2.49E-02 | black | 0.74134 |        |
| <i>TNPO1</i>    | NM_153188    | rs17780422 | 1.28E-03 | black | 0.49939 |        |
| <i>TPM1</i>     | NM_001018004 | rs6011530  | 1.02E-03 | black | 0.77667 |        |
| <i>TRAF6</i>    | NM_004620    | rs752775   | 3.98E-03 | black | 0.50354 |        |
| <i>TRAK1</i>    | NM_014965    | rs17557963 | 4.13E-03 | black | 0.87892 |        |
| <i>TRAM2</i>    | NM_012288    | rs10488327 | 1.19E-02 | black | 0.78262 |        |
| <i>TRIB2</i>    | NM_021643    | rs1024580  | 2.01E-03 | black | 0.95046 |        |
| <i>TRIM46</i>   | NM_025058    | rs6910440  | 2.71E-02 | black | 0.41288 |        |
| <i>TRIM68</i>   | NM_018073    | rs754814   | 2.75E-02 | black | 0.84961 |        |
| <i>TSPAN7</i>   | NM_004615    | NA         | NA       | black | 0.71360 | autism |

Supplementary Table 6

|                 |              |            |          |       |         |                   |
|-----------------|--------------|------------|----------|-------|---------|-------------------|
| <i>TUBB6</i>    | NM_032525    | rs4669835  | 1.07E-02 | black | 0.88512 |                   |
| <i>TUBB6</i>    | XM_940079    | NA         | NA       | black | 0.87457 |                   |
| <i>UBE2C</i>    | NM_181799    | rs7284581  | 6.72E-03 | black | 0.55153 |                   |
| <i>UBN1</i>     | NM_001079514 | rs7956904  | 3.34E-03 | black | 0.66013 |                   |
| <i>UPP1</i>     | NM_181597    | rs1959545  | 3.01E-03 | black | 0.12494 |                   |
| <i>VAV3</i>     | NM_006113    | rs8676     | 3.88E-03 | black | 0.43911 |                   |
| <i>VEGFA</i>    | NM_003376    | rs17641380 | 1.36E-02 | black | 0.89130 |                   |
| <i>VGF</i>      | NM_003378    | rs4851346  | 2.71E-03 | black | 0.50821 |                   |
| <i>VKORC1L1</i> | NM_173517    | rs1898305  | 2.97E-03 | black | 0.61744 |                   |
| <i>WDR4</i>     | NM_033661    | rs16830039 | 2.16E-02 | black | 0.78876 |                   |
| <i>WDR58</i>    | NM_024339    | NA         | NA       | black | 0.73626 |                   |
| <i>WEE1</i>     | NM_003390    | rs12473402 | 5.89E-03 | black | 0.90778 |                   |
| <i>WHDC1</i>    | XM_058720    | NA         | NA       | black | 0.57390 |                   |
| <i>WNT5A</i>    | NM_003392    | rs11152166 | 1.46E-02 | black | 0.85088 |                   |
| <i>WWC3</i>     | NM_015691    | NA         | NA       | black | 0.54123 |                   |
| <i>XAB1</i>     | NM_007266    | NA         | NA       | black | 0.86966 |                   |
| <i>ZDHHC18</i>  | NM_032283    | rs11015249 | 4.52E-03 | black | 0.74050 |                   |
| <i>ZFHX1B</i>   | NM_014795    | NA         | NA       | black | 0.40144 |                   |
| <i>ZFP2</i>     | NM_030613    | rs6734520  | 5.33E-02 | black | 0.45432 |                   |
| <i>ZHX3</i>     | NM_015035    | rs2836850  | 5.12E-04 | black | 0.56978 |                   |
| <i>ZNF312</i>   | NM_018008    | NA         | NA       | black | 0.75373 |                   |
| <i>ZNF323</i>   | NM_145909    | rs2831524  | 2.91E-03 | black | 0.45300 |                   |
| <i>ZNF438</i>   | NM_182755    | rs978003   | 3.07E-03 | black | 0.49707 |                   |
| <i>ZNF474</i>   | NM_207317    | rs6817971  | 1.43E-02 | black | 0.58094 |                   |
| <i>ZNF688</i>   | NM_145271    | rs4422383  | 2.46E-03 | black | 0.17677 |                   |
| <i>ZYX</i>      | NM_003461    | rs4662472  | 2.42E-02 | black | 0.92244 |                   |
| <i>ZYX</i>      | NM_003461    | rs4662472  | 2.42E-02 | black | 0.92858 |                   |
| <i>ACTA2</i>    | NM_001613    | rs3966851  | 1.96E-02 | blue  | 0.97990 |                   |
| <i>ACTL6B</i>   | NM_016188    | rs6706188  | 3.31E-03 | blue  | 0.89530 |                   |
| <i>ADAM19</i>   | NM_033274    | rs9870721  | 5.19E-03 | blue  | 0.89449 |                   |
| <i>ADD3</i>     | NM_001121    | rs458017   | 7.21E-03 | blue  | 0.90944 |                   |
| <i>AGTRL1</i>   | NM_005161    | NA         | NA       | blue  | 0.96608 |                   |
| <i>ALDH1L1</i>  | NM_012190    | rs4646703  | 1.03E-02 | blue  | 0.86122 |                   |
| <i>ALDH3A2</i>  | NM_001031806 | rs7149721  | 1.98E-03 | blue  | 0.93121 |                   |
| <i>ALDH5A1</i>  | NM_001080    | rs10054106 | 4.55E-03 | blue  | 0.67962 | autism & epilepsy |
| <i>ANKRD46</i>  | NM_198401    | rs17542122 | 4.23E-03 | blue  | 0.95662 |                   |
| <i>ANLN</i>     | NM_018685    | rs698295   | 9.38E-04 | blue  | 0.76767 |                   |
| <i>APLP1</i>    | NM_005166    | rs325833   | 1.03E-02 | blue  | 0.86639 |                   |
| <i>ARHGAP22</i> | NM_021226    | rs12191536 | 2.13E-03 | blue  | 0.78736 |                   |
| <i>ARHGEF7</i>  | NM_145735    | rs3797755  | 5.65E-03 | blue  | 0.72603 |                   |
| <i>ARL3</i>     | NM_004311    | rs9332445  | 4.72E-03 | blue  | 0.80995 |                   |
| <i>ARL4</i>     | NM_005738    | rs2075508  | 2.61E-02 | blue  | 0.93398 |                   |
| <i>ASF1B</i>    | NM_018154    | rs7812587  | 1.00E-02 | blue  | 0.88268 |                   |
| <i>ASPM</i>     | NM_018136    | rs7632519  | 3.18E-02 | blue  | 0.40693 |                   |
| <i>ASS1</i>     | NM_054012    | rs1605327  | 2.31E-02 | blue  | 0.55617 |                   |
| <i>ASTN</i>     | NM_004319    | NA         | NA       | blue  | 0.90284 |                   |
| <i>ATAD2</i>    | NM_014109    | rs430199   | 9.08E-03 | blue  | 0.77266 |                   |
| <i>ATP6V1G2</i> | NM_130463    | rs12909478 | 4.64E-02 | blue  | 0.96590 |                   |
| <i>ATP6V1G2</i> | NM_130463    | rs12909478 | 4.64E-02 | blue  | 0.81039 |                   |

Supplementary Table 6

|                  |              |            |          |      |         |        |
|------------------|--------------|------------|----------|------|---------|--------|
| <i>AURKA</i>     | NM_198434    | rs17117895 | 8.40E-04 | blue | 0.79031 |        |
| <i>AURKA</i>     | NM_198434    | rs17117895 | 8.40E-04 | blue | 0.81999 |        |
| <i>AURKB</i>     | NM_004217    | rs4747647  | 1.20E-02 | blue | 0.82894 |        |
| <i>AUTS2</i>     | NM_015570    | rs17087818 | 2.83E-05 | blue | 0.81608 | autism |
| <i>AYTL1</i>     | NM_017839    | NA         | NA       | blue | 0.81935 |        |
| <i>BAIAP2L2</i>  | NM_025045    | rs17106539 | 1.26E-02 | blue | 0.76310 |        |
| <i>BASP1</i>     | NM_006317    | rs10503593 | 6.12E-04 | blue | 0.92521 |        |
| <i>BAZ1A</i>     | NM_013448    | rs5971861  | 4.99E-03 | blue | 0.50105 |        |
| <i>BBOX1</i>     | NM_003986    | rs11015249 | 4.52E-03 | blue | 0.88933 |        |
| <i>BCAT1</i>     | NM_005504    | rs10946735 | 4.77E-03 | blue | 0.78848 |        |
| <i>BIRC5</i>     | NM_001168    | rs2407044  | 2.45E-02 | blue | 0.86440 |        |
| <i>BMS1L</i>     | NM_014753    | NA         | NA       | blue | 0.81136 |        |
| <i>BRUNOL6</i>   | NM_052840    | NA         | NA       | blue | 0.78415 |        |
| <i>BTBD14A</i>   | NM_144653    | NA         | NA       | blue | 0.85358 |        |
| <i>C10orf57</i>  | NM_025125    | rs2019384  | 2.41E-02 | blue | 0.88920 |        |
| <i>C11orf51</i>  | NM_014042    | rs6995985  | 6.34E-03 | blue | 0.58450 |        |
| <i>C13orf3</i>   | NM_145061    | NA         | NA       | blue | 0.79936 |        |
| <i>C14orf106</i> | NM_018353    | rs7908664  | 3.11E-03 | blue | 0.76709 |        |
| <i>C14orf151</i> | NM_032714    | NA         | NA       | blue | 0.71638 |        |
| <i>C15orf42</i>  | NM_152259    | rs11201937 | 3.84E-02 | blue | 0.71783 |        |
| <i>C17orf53</i>  | NM_024032    | rs9462553  | 5.15E-03 | blue | 0.78027 |        |
| <i>C18orf24</i>  | NM_145060    | NA         | NA       | blue | 0.70853 |        |
| <i>C19orf48</i>  | NM_199250    | rs6766861  | 8.05E-03 | blue | 0.75368 |        |
| <i>C1orf112</i>  | NM_018186    | rs1062976  | 2.49E-03 | blue | 0.87795 |        |
| <i>C1orf119</i>  | NM_020141    | NA         | NA       | blue | 0.84896 |        |
| <i>C1orf135</i>  | NM_024037    | rs199736   | 3.24E-03 | blue | 0.93462 |        |
| <i>C1orf173</i>  | NM_001002912 | rs1789250  | 9.51E-04 | blue | 0.87153 |        |
| <i>C1orf192</i>  | NM_001013625 | rs11716327 | 1.08E-02 | blue | 0.62670 |        |
| <i>C1QL4</i>     | NM_001008223 | rs2688143  | 4.02E-02 | blue | 0.80973 |        |
| <i>C1RL</i>      | NM_016546    | rs724940   | 1.79E-02 | blue | 0.70261 |        |
| <i>C20orf103</i> | NM_012261    | rs12659273 | 3.39E-03 | blue | 0.90230 |        |
| <i>C20orf129</i> | NM_030919    | NA         | NA       | blue | 0.98543 |        |
| <i>C22orf18</i>  | NM_024053    | rs2293690  | 2.67E-02 | blue | 0.89270 |        |
| <i>C9orf140</i>  | NM_178448    | rs3763662  | 4.10E-03 | blue | 0.97496 |        |
| <i>C9orf28</i>   | NM_033446    | rs2255177  | 7.69E-04 | blue | 0.74889 |        |
| <i>C9orf48</i>   | NM_194313    | NA         | NA       | blue | 0.72293 |        |
| <i>CA2</i>       | NM_000067    | rs8016092  | 4.67E-03 | blue | 0.37808 |        |
| <i>CAMK2B</i>    | NM_172078    | rs7326252  | 1.49E-04 | blue | 0.82927 |        |
| <i>CAMK2B</i>    | XM_936314    | NA         | NA       | blue | 0.81208 |        |
| <i>CCNA2</i>     | NM_001237    | rs9320884  | 5.47E-03 | blue | 0.91773 |        |
| <i>CCNB1</i>     | NM_031966    | rs12754452 | 1.14E-03 | blue | 0.77822 |        |
| <i>CCNB2</i>     | NM_004701    | rs950844   | 1.89E-02 | blue | 0.92761 |        |
| <i>CCNE1</i>     | NM_001238    | rs6457797  | 1.34E-02 | blue | 0.88053 |        |
| <i>CCNE2</i>     | NM_057735    | NA         | NA       | blue | 0.56370 |        |
| <i>CCNF</i>      | NM_001761    | rs11715813 | 1.90E-02 | blue | 0.90464 |        |
| <i>CD34</i>      | NM_001773    | rs1204682  | 5.41E-03 | blue | 0.89545 |        |
| <i>CD34</i>      | NM_001773    | rs1204682  | 5.41E-03 | blue | 0.91132 |        |
| <i>CD83</i>      | NM_004233    | rs4316797  | 4.18E-03 | blue | 0.73851 |        |
| <i>CD99</i>      | NM_002414    | NA         | NA       | blue | 0.73795 |        |

Supplementary Table 6

|                      |              |            |          |      |         |        |
|----------------------|--------------|------------|----------|------|---------|--------|
| <i>CDC2</i>          | NM_001786    | NA         | NA       | blue | 0.76554 |        |
| <i>CDC2</i>          | NM_033379    | NA         | NA       | blue | 0.74861 |        |
| <i>CDC20</i>         | NM_001255    | rs2838281  | 5.13E-04 | blue | 0.94100 |        |
| <i>CDC25A</i>        | NM_001789    | rs4774557  | 1.66E-03 | blue | 0.38310 |        |
| <i>CDC25A</i>        | NM_001789    | rs4774557  | 1.66E-03 | blue | 0.81625 |        |
| <i>CDC25C</i>        | NM_001790    | rs729614   | 4.81E-03 | blue | 0.79077 |        |
| <i>CDC25C</i>        | NM_001790    | rs729614   | 4.81E-03 | blue | 0.87606 |        |
| <i>CDC25C</i>        | NM_001790    | rs729614   | 4.81E-03 | blue | 0.82509 |        |
| <i>CDC45L</i>        | NM_003504    | NA         | NA       | blue | 0.81950 |        |
| <i>CDCA2</i>         | NM_152562    | rs1544369  | 5.45E-03 | blue | 0.90805 |        |
| <i>CDCA5</i>         | NM_080668    | rs11649437 | 1.95E-02 | blue | 0.99250 |        |
| <i>CDCA8</i>         | NM_018101    | rs7081464  | 1.72E-03 | blue | 0.97726 |        |
| <i>CDK2</i>          | NM_001798    | rs11003452 | 1.17E-02 | blue | 0.88597 |        |
| <i>CDKN3</i>         | NM_005192    | rs4811641  | 8.28E-03 | blue | 0.79395 |        |
| <i>CDT1</i>          | NM_030928    | rs9518903  | 6.03E-03 | blue | 0.89671 |        |
| <i>CENPA</i>         | NM_001042426 | rs7626334  | 6.87E-03 | blue | 0.91652 |        |
| <i>CENPA</i>         | NM_001809    | rs7626334  | 6.87E-03 | blue | 0.83068 |        |
| <i>CENPE</i>         | NM_001813    | rs9783669  | 3.35E-03 | blue | 0.59411 |        |
| <i>CENPM</i>         | NM_001002876 | rs2293690  | 2.67E-02 | blue | 0.89225 |        |
| <i>CENPM</i>         | NM_001002876 | rs2293690  | 2.67E-02 | blue | 0.82809 |        |
| <i>CEP55</i>         | NM_018131    | rs10882254 | 4.95E-03 | blue | 0.99548 |        |
| <i>CHCHD7</i>        | NM_001011668 | rs10783915 | 5.19E-04 | blue | 0.81432 |        |
| <i>CHGA</i>          | NM_001275    | rs16918472 | 6.91E-03 | blue | 0.74403 |        |
| <i>CHST10</i>        | NM_004854    | rs471767   | 2.05E-02 | blue | 0.80408 |        |
| <i>CMTM4</i>         | NM_178818    | rs1471504  | 4.02E-03 | blue | 0.78886 |        |
| <i>CMTM7</i>         | NM_138410    | rs533873   | 1.94E-03 | blue | 0.86318 |        |
| <i>COL11A1</i>       | NM_080629    | rs7543626  | 3.26E-04 | blue | 0.85997 |        |
| <i>COL8A1</i>        | NM_020351    | rs17611664 | 2.65E-03 | blue | 0.73384 |        |
| <i>CPE</i>           | NM_001873    | rs6738393  | 9.33E-03 | blue | 0.74901 |        |
| <i>CRY2</i>          | NM_021117    | rs2428684  | 4.57E-03 | blue | 0.77121 |        |
| <i>CSS3</i>          | NM_175856    | NA         | NA       | blue | 0.76455 |        |
| <i>CTNND2</i>        | NM_001332    | rs2304402  | 1.24E-03 | blue | 0.83977 |        |
| <i>CTPS</i>          | NM_001905    | rs7955255  | 1.45E-03 | blue | 0.93610 |        |
| <i>CTSH</i>          | NM_004390    | rs8005999  | 3.69E-04 | blue | 0.87869 |        |
| <i>CYBRD1</i>        | NM_024843    | rs2281486  | 1.90E-02 | blue | 0.78680 |        |
| <i>CYP26A1</i>       | NM_000783    | rs10786069 | 1.66E-02 | blue | 0.90762 |        |
| <i>CYP4F11</i>       | NM_021187    | rs11023775 | 1.32E-02 | blue | 0.85920 |        |
| <i>DCBLD2</i>        | NM_080927    | rs2282432  | 1.89E-03 | blue | 0.76962 |        |
| <i>DDX25</i>         | NM_013264    | rs11248570 | 1.39E-02 | blue | 0.86962 |        |
| <i>DIAPH3</i>        | NM_001042517 | rs6850334  | 2.73E-05 | blue | 0.79981 | autism |
| <i>DIP</i>           | NM_015124    | NA         | NA       | blue | 0.91867 |        |
| <i>DKFZP564J102</i>  | NM_015398    | NA         | NA       | blue | 0.90376 |        |
| <i>DKFZP564J102</i>  | NM_015398    | NA         | NA       | blue | 0.83834 |        |
| <i>DKFZp762E1312</i> | NM_018410    | NA         | NA       | blue | 0.91494 |        |
| <i>DLG7</i>          | NM_014750    | NA         | NA       | blue | 0.87309 |        |
| <i>DNMT1</i>         | NM_001379    | rs6432057  | 2.89E-03 | blue | 0.66044 |        |
| <i>DTX1</i>          | NM_004416    | rs11613438 | 6.58E-03 | blue | 0.82864 |        |
| <i>E2F2</i>          | NM_004091    | rs12432194 | 1.14E-02 | blue | 0.75226 |        |
| <i>E2F7</i>          | NM_203394    | rs7237754  | 2.27E-03 | blue | 0.93506 |        |

Supplementary Table 6

|                 |              |            |          |      |         |          |
|-----------------|--------------|------------|----------|------|---------|----------|
| <i>ECOP</i>     | NM_030796    | NA         | NA       | blue | 0.42962 |          |
| <i>EFHD1</i>    | NM_025202    | rs4072149  | 1.05E-01 | blue | 0.95827 |          |
| <i>EFNB3</i>    | NM_001406    | rs12445659 | 1.28E-03 | blue | 0.90104 |          |
| <i>ELA1</i>     | NM_001971    | NA         | NA       | blue | 0.71679 |          |
| <i>ELOVL6</i>   | NM_024090    | rs4627009  | 4.46E-03 | blue | 0.92201 |          |
| <i>ENPP5</i>    | NM_021572    | rs10807337 | 9.08E-03 | blue | 0.73444 |          |
| <i>EPB41L3</i>  | NM_012307    | rs1386072  | 1.86E-03 | blue | 0.78329 |          |
| <i>EXO1</i>     | NM_003686    | rs4149963  | 2.61E-02 | blue | 0.94056 |          |
| <i>EXO1</i>     | NM_006027    | rs4149963  | 2.61E-02 | blue | 0.69357 |          |
| <i>EXOSC3</i>   | NM_001002269 | rs11967968 | 4.50E-02 | blue | 0.91157 |          |
| <i>EXOSC3</i>   | NM_016042    | rs11967968 | 4.50E-02 | blue | 0.97885 |          |
| <i>EXOSC9</i>   | NM_005033    | rs10846569 | 2.39E-02 | blue | 0.90629 |          |
| <i>FAIM2</i>    | NM_012306    | rs2255532  | 1.51E-03 | blue | 0.72772 |          |
| <i>FAM107A</i>  | NM_007177    | rs9630426  | 9.56E-03 | blue | 0.95314 |          |
| <i>FAM64A</i>   | NM_019013    | rs1548842  | 1.35E-03 | blue | 0.88305 |          |
| <i>FANCD2</i>   | NM_001018115 | rs6432057  | 2.89E-03 | blue | 0.75370 |          |
| <i>FEN1</i>     | NM_004111    | rs6090305  | 8.03E-03 | blue | 0.98662 |          |
| <i>FER1L3</i>   | NM_013451    | NA         | NA       | blue | 0.91296 |          |
| <i>FER1L3</i>   | NM_013451    | NA         | NA       | blue | 0.75616 |          |
| <i>FEZ1</i>     | NM_022549    | rs17724818 | 2.76E-02 | blue | 0.76684 |          |
| <i>FGD3</i>     | NM_033086    | rs10786069 | 1.66E-02 | blue | 0.65986 |          |
| <i>FGF9</i>     | NM_002010    | rs4283868  | 2.04E-02 | blue | 0.87099 |          |
| <i>FKBP1A</i>   | NM_054014    | rs10809917 | 2.22E-03 | blue | 0.79535 |          |
| <i>FKSG14</i>   | NM_022145    | NA         | NA       | blue | 0.86039 |          |
| <i>FLJ12505</i> | NM_024749    | NA         | NA       | blue | 0.86227 |          |
| <i>FLJ14213</i> | NM_024841    | NA         | NA       | blue | 0.70977 |          |
| <i>FLJ20105</i> | NM_017669    | NA         | NA       | blue | 0.74971 |          |
| <i>FLJ20152</i> | NM_001034850 | NA         | NA       | blue | 0.91065 |          |
| <i>FLJ20152</i> | NM_001034850 | NA         | NA       | blue | 0.76380 |          |
| <i>FLJ20364</i> | NM_017785    | NA         | NA       | blue | 0.83491 |          |
| <i>FLJ20701</i> | NM_017933    | NA         | NA       | blue | 0.90299 |          |
| <i>FLJ25416</i> | NM_145018    | NA         | NA       | blue | 0.74375 |          |
| <i>FLJ31196</i> | NM_152908    | NA         | NA       | blue | 0.94370 |          |
| <i>FLJ35220</i> | NM_173627    | rs4744709  | 3.95E-03 | blue | 0.82955 |          |
| <i>FLJ40629</i> | NM_152515    | NA         | NA       | blue | 0.75494 |          |
| <i>FOXD1</i>    | NM_004472    | rs10868936 | 3.18E-02 | blue | 0.29307 |          |
| <i>FOXM1</i>    | NM_021953    | rs6793237  | 3.34E-03 | blue | 0.82510 |          |
| <i>FOXM1</i>    | NM_202002    | rs6793237  | 3.34E-03 | blue | 0.75793 |          |
| <i>FUCA1</i>    | NM_000147    | rs13435868 | 2.54E-02 | blue | 0.93302 |          |
| <i>GABBR1</i>   | NM_021905    | NA         | NA       | blue | 0.84715 | epilepsy |
| <i>GABBR2</i>   | NM_005458    | rs1567663  | 1.52E-03 | blue | 0.90229 |          |
| <i>GALC</i>     | NM_000153    | rs9871262  | 1.72E-02 | blue | 0.58583 |          |
| <i>GARNL3</i>   | NM_032293    | rs10894147 | 2.48E-03 | blue | 0.84267 |          |
| <i>GLIPR1</i>   | NM_006851    | rs1359872  | 9.39E-03 | blue | 0.98068 |          |
| <i>GNAO1</i>    | NM_020988    | rs930185   | 4.24E-03 | blue | 0.90428 |          |
| <i>GPR137B</i>  | NM_003272    | rs11563248 | 1.71E-02 | blue | 0.88820 |          |
| <i>GRPR</i>     | NM_005314    | NA         | NA       | blue | 0.84359 | autism   |
| <i>GSTM3</i>    | NM_000849    | rs10787083 | 8.50E-02 | blue | 0.79247 |          |
| <i>GTSE1</i>    | NM_016426    | rs6775113  | 4.72E-03 | blue | 0.97215 |          |



Supplementary Table 6

|                  |              |            |          |      |         |        |
|------------------|--------------|------------|----------|------|---------|--------|
| <i>H2AFX</i>     | NM_002105    | rs7441935  | 5.88E-02 | blue | 0.69029 |        |
| <i>HEATR1</i>    | NM_018072    | rs653737   | 8.02E-03 | blue | 0.74492 |        |
| <i>HEPH</i>      | NM_138737    | NA         | NA       | blue | 0.92184 |        |
| <i>HIST1H2AC</i> | NM_003512    | rs198845   | 1.85E-03 | blue | 0.82364 |        |
| <i>HMMR</i>      | NM_012485    | rs4856711  | 3.15E-02 | blue | 0.85968 |        |
| <i>HNRPAB</i>    | NM_031266    | NA         | NA       | blue | 0.88863 |        |
| <i>HOMER2</i>    | NM_199332    | rs9986815  | 1.09E-03 | blue | 0.84566 |        |
| <i>HPS1</i>      | NM_182639    | rs1230157  | 3.70E-03 | blue | 0.69233 |        |
| <i>ID1</i>       | NM_181353    | rs7997640  | 6.64E-03 | blue | 0.83379 |        |
| <i>IGFBP2</i>    | NM_000597    | rs9341145  | 1.65E-02 | blue | 0.76874 |        |
| <i>IGFBP3</i>    | NM_001013398 | rs511310   | 4.96E-03 | blue | 0.87077 |        |
| <i>IGFBP3</i>    | NM_001013398 | rs511310   | 4.96E-03 | blue | 0.92092 |        |
| <i>IMPA2</i>     | NM_014214    | rs6485416  | 5.06E-03 | blue | 0.79503 |        |
| <i>IRX3</i>      | NM_024336    | rs466272   | 7.89E-03 | blue | 0.81038 |        |
| <i>ITGA5</i>     | NM_002205    | rs10185735 | 2.72E-02 | blue | 0.93007 |        |
| <i>KIAA0101</i>  | NM_014736    | rs6858066  | 7.16E-03 | blue | 0.62126 |        |
| <i>KIAA0101</i>  | NM_014736    | rs6858066  | 7.16E-03 | blue | 0.68933 |        |
| <i>KIAA0367</i>  | NM_015225    | rs17777549 | 6.42E-04 | blue | 0.80909 |        |
| <i>KIAA0746</i>  | NM_015187    | NA         | NA       | blue | 0.76722 |        |
| <i>KIAA1794</i>  | NM_018193    | NA         | NA       | blue | 0.76467 |        |
| <i>KIF14</i>     | NM_014875    | rs2686110  | 8.50E-02 | blue | 0.61312 |        |
| <i>KIF20A</i>    | NM_005733    | rs13290613 | 4.42E-03 | blue | 0.89498 |        |
| <i>KIF23</i>     | NM_004856    | rs12327356 | 2.22E-03 | blue | 0.95859 |        |
| <i>KIF2C</i>     | NM_006845    | rs2868882  | 3.23E-02 | blue | 0.86828 |        |
| <i>KIF4A</i>     | NM_012310    | NA         | NA       | blue | 0.93620 |        |
| <i>KIFC1</i>     | NM_002263    | rs6462481  | 2.99E-03 | blue | 0.64269 |        |
| <i>KNDC1</i>     | NM_152643    | rs7734632  | 5.42E-03 | blue | 0.71751 |        |
| <i>KNS2</i>      | NM_005552    | NA         | NA       | blue | 0.86995 |        |
| <i>LAMP2</i>     | NM_002294    | NA         | NA       | blue | 0.89161 |        |
| <i>LANCL2</i>    | NM_018697    | rs7174662  | 5.01E-04 | blue | 0.75745 |        |
| <i>LAYN</i>      | NM_178834    | rs10214672 | 4.88E-02 | blue | 0.81286 |        |
| <i>LIG1</i>      | NM_000234    | rs16976194 | 2.20E-03 | blue | 0.66463 |        |
| <i>LMAN2L</i>    | NM_030805    | rs8031417  | 1.64E-02 | blue | 0.80896 |        |
| <i>LMNB2</i>     | NM_032737    | rs11715813 | 1.90E-02 | blue | 0.81276 |        |
| <i>LOC653133</i> | XM_926881    | NA         | NA       | blue | 0.70523 |        |
| <i>LRAT</i>      | NM_004744    | rs6885454  | 1.87E-03 | blue | 0.64282 |        |
| <i>LRRC1</i>     | NM_018214    | rs2397376  | 4.77E-04 | blue | 0.79537 | autism |
| <i>LY6E</i>      | NM_002346    | rs2328518  | 2.76E-02 | blue | 0.81960 |        |
| <i>LYPLA2</i>    | NM_007260    | rs11564338 | 8.29E-03 | blue | 0.70083 |        |
| <i>MAF</i>       | NM_005360    | rs10519280 | 2.36E-02 | blue | 0.71813 |        |
| <i>MAN1C1</i>    | NM_020379    | rs12518194 | 1.32E-05 | blue | 0.72802 |        |
| <i>MAOB</i>      | NM_000898    | NA         | NA       | blue | 0.91617 |        |
| <i>MAPK1</i>     | NM_138957    | rs6426629  | 2.74E-03 | blue | 0.72731 |        |
| <i>MASP1</i>     | NM_001031849 | rs815336   | 2.39E-02 | blue | 0.93306 |        |
| <i>MASP1</i>     | NM_001031849 | rs815336   | 2.39E-02 | blue | 0.84946 |        |
| <i>MASP1</i>     | NM_139125    | rs815336   | 2.39E-02 | blue | 0.66086 |        |
| <i>MBP</i>       | NM_001025100 | rs7618979  | 3.44E-03 | blue | 0.81986 |        |
| <i>MCM10</i>     | NM_018518    | rs8083969  | 9.80E-04 | blue | 0.64962 |        |
| <i>MCM10</i>     | NM_018518    | rs8083969  | 9.80E-04 | blue | 0.76164 |        |

Supplementary Table 6

|                  |              |            |          |      |         |
|------------------|--------------|------------|----------|------|---------|
| <i>MCM2</i>      | NM_004526    | rs11242001 | 6.85E-03 | blue | 0.75113 |
| <i>MCM3</i>      | NM_002388    | rs4286900  | 2.39E-02 | blue | 0.81017 |
| <i>MCM4</i>      | NM_005914    | rs2879526  | 5.31E-03 | blue | 0.85148 |
| <i>MCM4</i>      | NM_182746    | rs2879526  | 5.31E-03 | blue | 0.73136 |
| <i>MCM5</i>      | NM_006739    | rs7014743  | 3.43E-03 | blue | 0.90370 |
| <i>MCM6</i>      | NM_005915    | rs7625747  | 1.21E-02 | blue | 0.84628 |
| <i>MCM7</i>      | NM_005916    | rs10509714 | 1.22E-03 | blue | 0.83333 |
| <i>MELK</i>      | NM_014791    | rs444543   | 5.47E-03 | blue | 0.99159 |
| <i>MFAP4</i>     | NM_002404    | rs7501702  | 4.93E-03 | blue | 0.79490 |
| <i>MGC16372</i>  | NM_145038    | NA         | NA       | blue | 0.82248 |
| <i>MGC24665</i>  | NM_152308    | NA         | NA       | blue | 0.75863 |
| <i>MGC33556</i>  | NM_001004307 | NA         | NA       | blue | 0.54152 |
| <i>MPHOSPH1</i>  | NM_016195    | NA         | NA       | blue | 0.81382 |
| <i>MT3</i>       | NM_005954    | rs6014947  | 6.54E-03 | blue | 0.55791 |
| <i>MTAP</i>      | NM_002451    | rs13152723 | 5.15E-03 | blue | 0.89094 |
| <i>MTHFD2</i>    | NM_006636    | rs12607049 | 4.02E-02 | blue | 0.83304 |
| <i>MTHFD2</i>    | NM_001040409 | NA         | NA       | blue | 0.94620 |
| <i>MXD3</i>      | NM_031300    | rs387933   | 2.52E-01 | blue | 0.51655 |
| <i>NCAPG2</i>    | NM_017760    | rs1432679  | 1.85E-02 | blue | 0.91528 |
| <i>NDRG2</i>     | NM_201535    | rs9295471  | 1.55E-03 | blue | 0.62782 |
| <i>NDRG2</i>     | NM_201539    | rs9295471  | 1.55E-03 | blue | 0.89463 |
| <i>NEBL</i>      | NM_213569    | rs10437776 | 2.43E-03 | blue | 0.75717 |
| <i>NEBL</i>      | NM_006393    | rs4130339  | 3.88E-03 | blue | 0.71263 |
| <i>NEDD9</i>     | NM_006403    | rs2242451  | 3.01E-03 | blue | 0.73678 |
| <i>NEK11</i>     | NM_024800    | rs4731935  | 1.26E-02 | blue | 0.70662 |
| <i>NGFRAP1L1</i> | NM_001012978 | NA         | NA       | blue | 0.91717 |
| <i>NME5</i>      | NM_003551    | rs1897419  | 3.23E-02 | blue | 0.72523 |
| <i>NOLC1</i>     | NM_004741    | rs2399931  | 4.14E-03 | blue | 0.82532 |
| <i>NR2F1</i>     | NM_005654    | rs2391199  | 1.73E-02 | blue | 0.87096 |
| <i>NTF3</i>      | NM_002527    | rs11729359 | 8.88E-03 | blue | 0.68977 |
| <i>NUSAP1</i>    | NM_016359    | rs4237674  | 4.20E-03 | blue | 0.58437 |
| <i>OBFC2A</i>    | NM_022837    | NA         | NA       | blue | 0.64659 |
| <i>OCIAD2</i>    | NM_152398    | rs2255532  | 1.51E-03 | blue | 0.66870 |
| <i>OIP5</i>      | NM_007280    | rs4237674  | 4.20E-03 | blue | 0.74505 |
| <i>OLFM1</i>     | NM_014279    | rs1571332  | 1.28E-03 | blue | 0.81357 |
| <i>OPTN</i>      | NM_001008213 | rs7740162  | 1.42E-03 | blue | 0.87371 |
| <i>ORC1L</i>     | NM_004153    | NA         | NA       | blue | 0.80399 |
| <i>PACRG</i>     | NM_001080379 | rs1936075  | 6.98E-05 | blue | 0.66142 |
| <i>PARP6</i>     | NM_020214    | rs2736468  | 2.78E-03 | blue | 0.57999 |
| <i>PBK</i>       | NM_018492    | rs239649   | 9.68E-03 | blue | 0.74918 |
| <i>PCK3</i>      | NM_212503    | NA         | NA       | blue | 0.64698 |
| <i>PDE5A</i>     | NM_033437    | rs7129402  | 4.41E-02 | blue | 0.73179 |
| <i>PDSS1</i>     | NM_014317    | rs11015249 | 4.52E-03 | blue | 0.80179 |
| <i>Pfs2</i>      | NM_016095    | NA         | NA       | blue | 0.85664 |
| <i>PGAM2</i>     | NM_000290    | rs2838407  | 1.35E-02 | blue | 0.84657 |
| <i>PGCP</i>      | NM_016134    | rs2297319  | 6.75E-04 | blue | 0.82314 |
| <i>PIGZ</i>      | NM_025163    | rs17731449 | 2.42E-01 | blue | 0.70413 |
| <i>PKMYT1</i>    | NM_182687    | rs8078781  | 1.59E-04 | blue | 0.70079 |
| <i>PKN3</i>      | NM_013355    | rs4663010  | 6.80E-03 | blue | 0.74222 |

Supplementary Table 6

|                 |           |            |          |      |         |        |
|-----------------|-----------|------------|----------|------|---------|--------|
| <i>PLA2G4C</i>  | NM_003706 | rs750456   | 1.37E-03 | blue | 0.99184 |        |
| <i>PLEKHB1</i>  | NM_021200 | rs7836062  | 2.19E-03 | blue | 0.77864 |        |
| <i>PLK4</i>     | NM_014264 | rs674768   | 2.96E-03 | blue | 0.86216 |        |
| <i>PLSCR4</i>   | NM_020353 | rs6967121  | 1.52E-02 | blue | 0.89806 |        |
| <i>PLXDC2</i>   | NM_032812 | rs675465   | 4.63E-04 | blue | 0.80711 |        |
| <i>PMAIP1</i>   | NM_021127 | rs966248   | 3.92E-03 | blue | 0.82477 |        |
| <i>POLE2</i>    | NM_002692 | rs974897   | 4.84E-04 | blue | 0.92703 |        |
| <i>POLQ</i>     | NM_199420 | rs1432309  | 1.65E-02 | blue | 0.92281 |        |
| <i>PPAP2A</i>   | NM_003711 | rs2133471  | 4.41E-03 | blue | 0.89159 |        |
| <i>PPAP2A</i>   | NM_176895 | rs2133471  | 4.41E-03 | blue | 0.51280 |        |
| <i>PPAP2A</i>   | NM_176895 | rs2133471  | 4.41E-03 | blue | 0.87552 |        |
| <i>PPIL6</i>    | NM_173672 | rs11193910 | 7.12E-03 | blue | 0.67110 |        |
| <i>PPM1E</i>    | NM_014906 | rs1498821  | 3.94E-04 | blue | 0.47683 |        |
| <i>PPP1CA</i>   | NM_002708 | rs1937526  | 1.85E-02 | blue | 0.68968 |        |
| <i>PPP1R14C</i> | NM_030949 | rs9831865  | 7.15E-03 | blue | 0.85940 |        |
| <i>PRC1</i>     | NM_003981 | rs6551408  | 8.14E-03 | blue | 0.95084 |        |
| <i>PREX1</i>    | NM_020820 | rs1077216  | 1.10E-03 | blue | 0.71294 |        |
| <i>PRR11</i>    | NM_018304 | rs11003452 | 1.17E-02 | blue | 0.78312 |        |
| <i>PSD2</i>     | NM_032289 | rs11776870 | 2.45E-03 | blue | 0.96174 |        |
| <i>PSME4</i>    | NM_014614 | rs12582022 | 5.55E-03 | blue | 0.83261 |        |
| <i>PTCHD1</i>   | NM_173495 | NA         | NA       | blue | 0.74638 | autism |
| <i>PTPRM</i>    | NM_002845 | rs12448409 | 5.66E-06 | blue | 0.86091 |        |
| <i>PTTG1</i>    | NM_004219 | rs1656377  | 7.42E-03 | blue | 0.83883 |        |
| <i>PTTG3</i>    | NR_002734 | NA         | NA       | blue | 0.70964 |        |
| <i>RAB38</i>    | NM_022337 | rs9871262  | 1.72E-02 | blue | 0.93003 |        |
| <i>RAB3C</i>    | NM_138453 | rs12598492 | 2.35E-03 | blue | 0.84883 |        |
| <i>RAB6B</i>    | NM_016577 | rs2024704  | 1.33E-03 | blue | 0.91705 |        |
| <i>RABL5</i>    | NM_022777 | rs4928200  | 1.56E-02 | blue | 0.66227 |        |
| <i>RACGAP1</i>  | NM_013277 | rs9964756  | 1.07E-02 | blue | 0.89920 |        |
| <i>RAD51AP1</i> | NM_006479 | rs420944   | 2.01E-02 | blue | 0.91357 |        |
| <i>RAD54L</i>   | NM_003579 | rs2839159  | 6.83E-04 | blue | 0.84197 |        |
| <i>RALGPS1</i>  | NM_014636 | rs674768   | 2.96E-03 | blue | 0.91677 |        |
| <i>RANBP3L</i>  | NM_145000 | rs11737439 | 2.32E-03 | blue | 0.89674 |        |
| <i>RARB</i>     | NM_000965 | rs3783142  | 9.51E-04 | blue | 0.88012 |        |
| <i>RARB</i>     | NM_000965 | rs3783142  | 9.51E-04 | blue | 0.80828 |        |
| <i>RASAL2</i>   | NM_170692 | rs4132381  | 3.88E-03 | blue | 0.77638 |        |
| <i>RCC1</i>     | NM_001269 | rs6549877  | 1.25E-02 | blue | 0.77503 |        |
| <i>REEP1</i>    | NM_022912 | rs4073109  | 2.66E-03 | blue | 0.76743 |        |
| <i>RFC3</i>     | NM_002915 | rs10954906 | 1.42E-03 | blue | 0.92577 |        |
| <i>RFWD3</i>    | NM_018124 | rs7231241  | 1.88E-03 | blue | 0.84393 |        |
| <i>RGS11</i>    | NM_183337 | rs10967209 | 1.34E-02 | blue | 0.52628 |        |
| <i>RNASE4</i>   | NM_002937 | rs10811336 | 6.91E-04 | blue | 0.97172 |        |
| <i>RNASE4</i>   | NM_194430 | NA         | NA       | blue | 0.95673 |        |
| <i>RNASE4</i>   | NM_194430 | NA         | NA       | blue | 0.79239 |        |
| <i>RNF13</i>    | NM_183381 | rs4725434  | 9.55E-04 | blue | 0.78135 |        |
| <i>RNF165</i>   | NM_152470 | rs17557963 | 4.13E-03 | blue | 0.80794 |        |
| <i>RNF36</i>    | NM_080745 | rs1078342  | 3.70E-02 | blue | 0.75748 |        |
| <i>RRM2</i>     | NM_001034 | rs11249984 | 8.36E-04 | blue | 0.99321 |        |
| <i>RUFY3</i>    | NM_014961 | rs11823867 | 2.28E-03 | blue | 0.83936 |        |

Supplementary Table 6

|                 |              |            |          |      |         |
|-----------------|--------------|------------|----------|------|---------|
| <i>SCARB1</i>   | NM_005505    | rs11711456 | 3.29E-03 | blue | 0.77364 |
| <i>SCN3B</i>    | NM_018400    | rs3867146  | 1.81E-02 | blue | 0.78356 |
| <i>SEPN1</i>    | NM_020451    | rs4307059  | 1.07E-05 | blue | 0.83573 |
| <i>SGOL1</i>    | NM_001012413 | rs3846990  | 9.78E-03 | blue | 0.92703 |
| <i>SH3BP4</i>   | NM_014521    | rs12078739 | 2.80E-03 | blue | 0.80991 |
| <i>SKIP</i>     | NM_030623    | NA         | NA       | blue | 0.90568 |
| <i>SLC22A17</i> | NM_016609    | rs2827617  | 2.59E-03 | blue | 0.78447 |
| <i>SLC25A15</i> | NM_014252    | rs10219573 | 2.34E-02 | blue | 0.77513 |
| <i>SLC35A1</i>  | NM_006416    | rs17164472 | 1.47E-03 | blue | 0.81105 |
| <i>SLC8A2</i>   | NM_015063    | rs37787    | 7.65E-03 | blue | 0.70602 |
| <i>SNAP25</i>   | NM_003081    | rs11249984 | 8.36E-04 | blue | 0.95733 |
| <i>SNAP91</i>   | NM_014841    | rs4506862  | 1.21E-03 | blue | 0.85489 |
| <i>SNCAIP</i>   | NM_005460    | rs2416744  | 1.31E-03 | blue | 0.90868 |
| <i>SOX15</i>    | NM_006942    | rs2764386  | 1.55E-02 | blue | 0.85821 |
| <i>SOX3</i>     | NM_005634    | NA         | NA       | blue | 0.90160 |
| <i>SPAG16</i>   | NM_001025436 | rs4655413  | 1.03E-01 | blue | 0.52264 |
| <i>SPAG5</i>    | NM_006461    | rs9965582  | 1.61E-03 | blue | 0.81695 |
| <i>SPIRE2</i>   | NM_032451    | rs2970358  | 8.34E-03 | blue | 0.74196 |
| <i>SPOCK</i>    | NM_004598    | NA         | NA       | blue | 0.91129 |
| <i>ST7</i>      | NM_018412    | rs1999930  | 1.34E-04 | blue | 0.87975 |
| <i>ST8SIA2</i>  | NM_006011    | rs17015982 | 5.05E-03 | blue | 0.83029 |
| <i>STEAP3</i>   | NM_018234    | rs17750541 | 4.58E-03 | blue | 0.93907 |
| <i>SVOP</i>     | NM_018711    | rs11983030 | 2.97E-03 | blue | 0.83113 |
| <i>SYNGR1</i>   | NM_004711    | rs11070241 | 4.65E-03 | blue | 0.78468 |
| <i>SYNPR</i>    | NM_144642    | rs649761   | 1.98E-03 | blue | 0.93266 |
| <i>SYP</i>      | NM_003179    | NA         | NA       | blue | 0.88483 |
| <i>TACC3</i>    | NM_006342    | rs6714537  | 4.67E-03 | blue | 0.87592 |
| <i>TAGLN</i>    | NM_003186    | rs2145357  | 2.99E-03 | blue | 0.87396 |
| <i>TCEAL2</i>   | NM_080390    | NA         | NA       | blue | 0.82949 |
| <i>THRA</i>     | NM_003250    | rs2016520  | 7.04E-04 | blue | 0.89852 |
| <i>TIMELESS</i> | NM_003920    | rs4239673  | 7.21E-03 | blue | 0.90320 |
| <i>TK1</i>      | NM_003258    | rs10506680 | 9.80E-02 | blue | 0.96082 |
| <i>TMEM130</i>  | NM_152913    | rs12789711 | 7.81E-03 | blue | 0.63542 |
| <i>TMPO</i>     | NM_003276    | rs4121680  | 5.17E-03 | blue | 0.66820 |
| <i>TPM1</i>     | NM_000366    | rs6011530  | 1.02E-03 | blue | 0.85212 |
| <i>TPM2</i>     | NM_003289    | rs12471144 | 3.83E-03 | blue | 0.92323 |
| <i>TPM2</i>     | NM_213674    | rs12471144 | 3.83E-03 | blue | 0.87206 |
| <i>TPM4</i>     | NM_003290    | rs1378164  | 2.40E-02 | blue | 0.77540 |
| <i>TPX2</i>     | NM_012112    | rs12547428 | 6.04E-03 | blue | 0.88486 |
| <i>TRIP13</i>   | NM_004237    | rs4816153  | 1.13E-02 | blue | 0.80770 |
| <i>TROAP</i>    | NM_005480    | rs2874120  | 5.68E-02 | blue | 0.83226 |
| <i>TTF2</i>     | NM_003594    | rs10850973 | 3.17E-03 | blue | 0.82397 |
| <i>TTK</i>      | NM_003318    | rs765619   | 5.27E-02 | blue | 0.84218 |
| <i>TYMS</i>     | NM_001071    | rs13381806 | 8.14E-03 | blue | 0.90335 |
| <i>UBE2C</i>    | NM_181800    | rs7284581  | 6.72E-03 | blue | 0.77345 |
| <i>UBE2C</i>    | NM_181803    | rs7284581  | 6.72E-03 | blue | 0.80663 |
| <i>UBE2T</i>    | NM_014176    | rs705731   | 1.40E-01 | blue | 0.66299 |
| <i>VCAM1</i>    | NM_001078    | rs17611664 | 2.65E-03 | blue | 0.94361 |
| <i>ZCCHC12</i>  | NM_173798    | NA         | NA       | blue | 1.00000 |

Supplementary Table 6

|                  |              |            |          |       |         |          |
|------------------|--------------|------------|----------|-------|---------|----------|
| <i>ZDHHC17</i>   | NM_015336    | rs2083868  | 8.13E-03 | blue  | 0.75926 |          |
| <i>ZNF259</i>    | NM_003904    | rs4453038  | 9.32E-03 | blue  | 0.71455 |          |
| <i>ZNF285A</i>   | NM_152354    | NA         | NA       | blue  | 0.86669 |          |
| <i>ACSL4</i>     | NM_004458    | NA         | NA       | brown | 0.58435 |          |
| <i>ACTL7B</i>    | NM_006686    | rs2844235  | 4.03E-02 | brown | 0.23323 |          |
| <i>ACY3</i>      | NM_080658    | rs9911654  | 6.65E-04 | brown | 0.01202 |          |
| <i>ACYP1</i>     | NM_203488    | rs2015066  | 1.55E-02 | brown | 0.01724 |          |
| <i>ADARB1</i>    | NM_001033049 | NA         | NA       | brown | 0.01867 | epilepsy |
| <i>ALX4</i>      | NM_021926    | rs1984192  | 5.50E-04 | brown | 0.01531 |          |
| <i>AMIGO2</i>    | NM_181847    | rs629772   | 1.42E-02 | brown | 0.27823 |          |
| <i>ARSA</i>      | NM_000487    | rs1548992  | 5.53E-03 | brown | 0.14309 |          |
| <i>ASCC3</i>     | NM_006828    | rs11765661 | 5.04E-03 | brown | 0.34633 |          |
| <i>ATP1A3</i>    | NM_152296    | rs4794301  | 9.80E-04 | brown | 0.06081 |          |
| <i>ATP6V1C1</i>  | NM_001695    | rs2146795  | 7.76E-03 | brown | 0.16416 |          |
| <i>ATP7B</i>     | NM_000053    | rs6063947  | 7.02E-03 | brown | 0.25042 |          |
| <i>BLVRB</i>     | NM_000713    | rs10493120 | 4.23E-03 | brown | 0.22662 |          |
| <i>BTNL2</i>     | NM_019602    | rs648166   | 1.71E-03 | brown | 0.42859 |          |
| <i>BVES</i>      | NM_007073    | rs1890227  | 3.09E-03 | brown | 0.00857 |          |
| <i>C10orf30</i>  | NM_152751    | NA         | NA       | brown | 0.14334 |          |
| <i>C17orf64</i>  | NM_181707    | rs11638718 | 5.16E-03 | brown | 0.19074 |          |
| <i>C17orf73</i>  | NM_017928    | NA         | NA       | brown | 0.99987 |          |
| <i>C1GALT1</i>   | NM_020156    | rs4689606  | 1.68E-04 | brown | 0.38876 |          |
| <i>C1orf95</i>   | NM_001003665 | rs7525939  | 5.31E-02 | brown | 0.02025 |          |
| <i>C20orf128</i> | NM_178468    | NA         | NA       | brown | 0.06005 |          |
| <i>C20orf42</i>  | NM_017671    | NA         | NA       | brown | 0.07524 |          |
| <i>C2orf10</i>   | NM_194250    | NA         | NA       | brown | 0.16315 |          |
| <i>C6</i>        | NM_000065    | rs7955255  | 1.45E-03 | brown | 0.15009 |          |
| <i>C6orf151</i>  | NM_152551    | NA         | NA       | brown | 0.22086 |          |
| <i>C8orf52</i>   | NM_017864    | NA         | NA       | brown | 0.34005 |          |
| <i>CACNG1</i>    | NM_000727    | rs322594   | 1.16E-02 | brown | 0.00781 |          |
| <i>CCDC46</i>    | NM_145036    | rs6011530  | 1.02E-03 | brown | 0.62166 |          |
| <i>CD1C</i>      | NM_001765    | rs4716447  | 6.94E-02 | brown | 0.26109 |          |
| <i>CDH22</i>     | NM_021248    | rs1984192  | 5.50E-04 | brown | 0.01040 | autism   |
| <i>CENTB2</i>    | NM_012287    | NA         | NA       | brown | 0.41426 |          |
| <i>CHX10</i>     | NM_182894    | NA         | NA       | brown | 0.26877 |          |
| <i>CLTC</i>      | NM_004859    | rs4239673  | 7.21E-03 | brown | 0.32552 |          |
| <i>CNTN4</i>     | NM_175612    | rs17025031 | 2.35E-03 | brown | 0.00018 | autism   |
| <i>CNTNAP2</i>   | NM_014141    | rs2373177  | 2.16E-04 | brown | 0.15664 | autism   |
| <i>CPNE1</i>     | NM_003915    | rs10130025 | 4.93E-03 | brown | 0.30769 |          |
| <i>DEFB107A</i>  | NM_001037668 | NA         | NA       | brown | 0.07679 |          |
| <i>DEPDC2</i>    | NM_024870    | NA         | NA       | brown | 0.03004 |          |
| <i>DEPDC2</i>    | NM_025170    | NA         | NA       | brown | 0.16787 |          |
| <i>DHFR</i>      | NM_000791    | rs1870923  | 3.76E-03 | brown | 0.72091 |          |
| <i>DIP2A</i>     | NM_206889    | rs17118127 | 4.87E-03 | brown | 0.02359 |          |
| <i>DIRC1</i>     | NM_052952    | rs4492063  | 5.71E-03 | brown | 0.31223 |          |
| <i>DKKL1</i>     | NM_014419    | rs2126756  | 7.34E-03 | brown | 0.70027 |          |
| <i>DOCK10</i>    | NM_014689    | rs4674953  | 3.18E-02 | brown | 0.19910 |          |
| <i>DOK2</i>      | NM_003974    | rs13152723 | 5.15E-03 | brown | 0.00125 |          |
| <i>DYRK3</i>     | NM_003582    | rs13390018 | 1.40E-01 | brown | 0.63890 |          |

Supplementary Table 6

|                  |              |            |          |       |         |        |
|------------------|--------------|------------|----------|-------|---------|--------|
| <i>EGFL9</i>     | NM_206539    | NA         | NA       | brown | 0.16289 |        |
| <i>EIF4E</i>     | NM_001968    | rs2282432  | 1.89E-03 | brown | 0.20734 | autism |
| <i>EN1</i>       | NM_001426    | rs716217   | 1.14E-02 | brown | 0.72315 |        |
| <i>EZH1</i>      | NM_001991    | rs12194275 | 3.66E-03 | brown | 0.16848 |        |
| <i>FAM102B</i>   | NM_001010883 | rs505461   | 6.29E-03 | brown | 0.14044 |        |
| <i>FBLN2</i>     | NM_001998    | rs2630453  | 2.38E-03 | brown | 0.00790 |        |
| <i>FBXO11</i>    | NM_018693    | NA         | NA       | brown | 0.76079 |        |
| <i>FBXO25</i>    | NM_183420    | rs10733505 | 2.30E-03 | brown | 0.13827 |        |
| <i>FGF1</i>      | NM_000800    | rs13086288 | 7.61E-03 | brown | 0.03626 |        |
| <i>FGF21</i>     | NM_019113    | rs6990991  | 3.20E-02 | brown | 0.16260 |        |
| <i>FLJ12056</i>  | NM_024933    | NA         | NA       | brown | 0.05904 |        |
| <i>FLJ20397</i>  | NM_017802    | NA         | NA       | brown | 0.36243 |        |
| <i>FLJ25680</i>  | NM_153216    | NA         | NA       | brown | 0.13699 |        |
| <i>FLJ30655</i>  | NM_144643    | NA         | NA       | brown | 0.53601 |        |
| <i>FLT3LG</i>    | NM_001459    | rs11663630 | 1.47E-02 | brown | 0.05258 |        |
| <i>FOXP1</i>     | NM_001012505 | rs10780684 | 9.94E-04 | brown | 0.06330 |        |
| <i>FUCA2</i>     | NM_032020    | rs358660   | 1.12E-02 | brown | 0.68900 |        |
| <i>GAGE2</i>     | NM_001472    | NA         | NA       | brown | 0.01461 |        |
| <i>GAS2L1</i>    | NM_152237    | rs243741   | 2.48E-02 | brown | 0.05306 |        |
| <i>GHR</i>       | NM_000163    | rs225436   | 3.99E-03 | brown | 0.28100 |        |
| <i>GLI1</i>      | NM_005269    | rs3741414  | 1.07E-02 | brown | 0.61554 |        |
| <i>GLMN</i>      | NM_053274    | rs10830986 | 4.48E-03 | brown | 0.04342 |        |
| <i>GLRA3</i>     | NM_006529    | rs11739413 | 3.31E-03 | brown | 0.00543 |        |
| <i>GMPR</i>      | NM_006877    | rs10508507 | 1.28E-03 | brown | 0.03943 |        |
| <i>GNAT1</i>     | NM_144499    | rs1037676  | 1.36E-02 | brown | 0.52663 |        |
| <i>GPR154</i>    | NM_207172    | NA         | NA       | brown | 0.00260 |        |
| <i>GRHL1</i>     | NM_014552    | NA         | NA       | brown | 0.06244 |        |
| <i>H1T2</i>      | NM_181788    | NA         | NA       | brown | 0.01654 |        |
| <i>HDAC9</i>     | NM_014707    | rs2824717  | 1.86E-03 | brown | 0.51470 |        |
| <i>HDAC9</i>     | NM_058177    | NA         | NA       | brown | 0.30611 |        |
| <i>HHEX</i>      | NM_002729    | rs10520810 | 2.20E-02 | brown | 0.00802 |        |
| <i>HOXB6</i>     | NM_156036    | NA         | NA       | brown | 0.39690 |        |
| <i>HS6ST2</i>    | NM_001077188 | NA         | NA       | brown | 0.37351 |        |
| <i>IGSF4D</i>    | NM_153184    | NA         | NA       | brown | 0.36661 |        |
| <i>IL25</i>      | NM_172314    | rs940009   | 1.18E-03 | brown | 0.01602 |        |
| <i>KCNC4</i>     | NM_004978    | rs10502133 | 2.45E-02 | brown | 0.47393 |        |
| <i>KCND3</i>     | NM_172198    | rs475620   | 2.34E-03 | brown | 0.29092 |        |
| <i>KCNIP3</i>    | NM_001034914 | rs17303283 | 7.15E-03 | brown | 0.65976 |        |
| <i>KIAA0564</i>  | NM_001009814 | rs7955255  | 1.45E-03 | brown | 0.62638 |        |
| <i>KIAA0776</i>  | NM_015323    | rs3814148  | 6.84E-03 | brown | 0.80810 |        |
| <i>KLF3</i>      | NM_016531    | rs8113143  | 6.69E-03 | brown | 0.20051 |        |
| <i>KPNA5</i>     | NM_002269    | rs9400957  | 1.93E-02 | brown | 0.19461 |        |
| <i>KRCC1</i>     | NM_016618    | rs1493007  | 1.13E-02 | brown | 0.18914 |        |
| <i>KRTAP10-2</i> | XM_942388    | NA         | NA       | brown | 0.21104 |        |
| <i>KRTAP13-2</i> | NM_181621    | rs2267172  | 4.39E-03 | brown | 0.12293 |        |
| <i>KRTHB5</i>    | NM_002283    | NA         | NA       | brown | 0.35943 |        |
| <i>LACTB</i>     | NM_171846    | rs6090229  | 1.94E-03 | brown | 0.56247 |        |
| <i>LAIR2</i>     | NM_021270    | rs17097088 | 3.14E-03 | brown | 0.27828 |        |
| <i>LECT1</i>     | NM_007015    | rs2456207  | 4.36E-03 | brown | 0.04619 |        |

Supplementary Table 6

|                  |              |            |          |       |         |
|------------------|--------------|------------|----------|-------|---------|
| <i>LHX9</i>      | NM_020204    | rs6759802  | 1.54E-01 | brown | 0.13444 |
| <i>LOC153364</i> | NM_203406    | NA         | NA       | brown | 0.23922 |
| <i>LOC285453</i> | NR_002805    | NA         | NA       | brown | 0.17839 |
| <i>LOC387856</i> | NM_001013635 | NA         | NA       | brown | 0.05083 |
| <i>LOC387921</i> | NM_001012754 | NA         | NA       | brown | 0.24839 |
| <i>LOC441233</i> | NM_001013724 | NA         | NA       | brown | 0.11934 |
| <i>LOC647760</i> | XM_943475    | NA         | NA       | brown | 0.14238 |
| <i>LOC653814</i> | XM_930108    | NA         | NA       | brown | 0.16254 |
| <i>LRP2BP</i>    | NM_018409    | rs6444054  | 1.13E-02 | brown | 0.33534 |
| <i>LSR</i>       | NM_015925    | rs6072705  | 3.47E-03 | brown | 0.05946 |
| <i>MAFA</i>      | NM_201589    | rs13068683 | 2.94E-02 | brown | 0.64568 |
| <i>MANEAL</i>    | NM_001031740 | rs17127036 | 1.66E-02 | brown | 1.00000 |
| <i>MAP4K5</i>    | NM_006575    | rs2526752  | 1.92E-03 | brown | 0.56829 |
| <i>MAP7D2</i>    | NM_152780    | NA         | NA       | brown | 0.28955 |
| <i>MDK</i>       | NM_001012334 | rs131100   | 1.02E-02 | brown | 0.22878 |
| <i>MFAP3L</i>    | NM_021647    | rs10930434 | 2.03E-02 | brown | 0.02155 |
| <i>MIB1</i>      | NM_020774    | rs4504735  | 1.34E-03 | brown | 0.24825 |
| <i>MIST</i>      | NM_052964    | NA         | NA       | brown | 0.24299 |
| <i>NARG2</i>     | NM_024611    | rs6071243  | 4.75E-04 | brown | 0.75759 |
| <i>NFE2L3</i>    | NM_004289    | rs12681736 | 1.79E-03 | brown | 0.37858 |
| <i>NME7</i>      | NM_197972    | rs4710230  | 2.13E-02 | brown | 0.73943 |
| <i>NOL8</i>      | NM_017948    | rs279968   | 1.04E-02 | brown | 0.21381 |
| <i>NPHP1</i>     | NM_000272    | rs7398343  | 1.51E-03 | brown | 0.13789 |
| <i>NRAP</i>      | NM_198060    | rs10787493 | 1.50E-02 | brown | 0.09733 |
| <i>NRG2</i>      | NM_013985    | NA         | NA       | brown | 0.35878 |
| <i>NUDT15</i>    | NM_018283    | rs12591300 | 7.52E-03 | brown | 0.53193 |
| <i>NUPL1</i>     | NM_001008565 | NA         | NA       | brown | 0.08134 |
| <i>NXPH2</i>     | NM_007226    | rs11776870 | 2.45E-03 | brown | 0.20124 |
| <i>NYD-SP21</i>  | NM_032597    | NA         | NA       | brown | 0.04027 |
| <i>ODF4</i>      | NM_153007    | rs962731   | 6.93E-04 | brown | 0.11675 |
| <i>OR1L8</i>     | NM_001004454 | rs2667469  | 4.11E-02 | brown | 0.22600 |
| <i>OR2AG2</i>    | NM_001004490 | rs8102571  | 2.19E-02 | brown | 0.39103 |
| <i>OR2W5</i>     | NM_001004698 | rs10925061 | 1.37E-01 | brown | 0.35830 |
| <i>OR5D13</i>    | NM_001001967 | rs644856   | 3.34E-02 | brown | 0.17207 |
| <i>P2RY6</i>     | NM_176798    | rs1192250  | 1.34E-03 | brown | 0.37816 |
| <i>PAK6</i>      | NM_020168    | rs8113143  | 6.69E-03 | brown | 0.23467 |
| <i>PCDHA5</i>    | NM_031501    | rs16910093 | 1.87E-02 | brown | 0.24963 |
| <i>PCGF3</i>     | NM_006315    | rs7937869  | 1.25E-03 | brown | 0.04593 |
| <i>PDCD1LG2</i>  | NM_025239    | rs1386072  | 1.86E-03 | brown | 0.07535 |
| <i>PDE3B</i>     | NM_000922    | rs731978   | 4.27E-03 | brown | 0.25915 |
| <i>PGM5P2</i>    | XR_001072    | NA         | NA       | brown | 0.01586 |
| <i>PLCB1</i>     | NM_182734    | rs962731   | 6.93E-04 | brown | 0.50692 |
| <i>PLCG1</i>     | NM_182811    | rs4768293  | 3.25E-03 | brown | 0.69385 |
| <i>PMS1</i>      | NM_000534    | rs4585357  | 4.46E-02 | brown | 0.56163 |
| <i>POTE8</i>     | NM_001005365 | NA         | NA       | brown | 0.10488 |
| <i>PPP1R12A</i>  | NM_002480    | rs7071575  | 2.75E-04 | brown | 0.87220 |
| <i>PRKACG</i>    | NM_002732    | rs13416248 | 8.59E-03 | brown | 0.41562 |
| <i>PRKCE</i>     | NM_005400    | rs7926726  | 4.26E-04 | brown | 0.65653 |
| <i>PSG7</i>      | NM_002783    | rs1959545  | 3.01E-03 | brown | 0.01053 |

Supplementary Table 6

|                   |              |            |          |       |         |
|-------------------|--------------|------------|----------|-------|---------|
| <i>PTAFR</i>      | NM_000952    | rs2831462  | 8.61E-05 | brown | 0.03190 |
| <i>PTMA</i>       | NM_002823    | rs4973475  | 3.04E-02 | brown | 0.21513 |
| <i>RBBP4</i>      | NM_005610    | rs896503   | 3.28E-03 | brown | 0.36487 |
| <i>RC3H1</i>      | NM_172071    | rs6556045  | 1.20E-02 | brown | 0.02394 |
| <i>REG3G</i>      | NM_001008387 | rs7148240  | 5.11E-03 | brown | 0.03720 |
| <i>RNF39</i>      | NM_170770    | NA         | NA       | brown | 0.57672 |
| <i>RP1L1</i>      | NM_178857    | rs4234497  | 9.50E-03 | brown | 0.28432 |
| <i>RPL3L</i>      | NM_005061    | rs12699477 | 1.54E-02 | brown | 0.25679 |
| <i>RSHL1</i>      | NM_030785    | NA         | NA       | brown | 0.33896 |
| <i>RXRG</i>       | NM_006917    | rs2964917  | 8.66E-03 | brown | 0.60277 |
| <i>RYR3</i>       | NM_001036    | rs17508455 | 4.07E-04 | brown | 0.60220 |
| <i>S100A1</i>     | NM_006271    | rs2071262  | 5.24E-03 | brown | 0.20093 |
| <i>SACS</i>       | NM_014363    | rs294185   | 6.73E-04 | brown | 0.40607 |
| <i>SAMD7</i>      | NM_182610    | rs2355826  | 1.77E-02 | brown | 0.11123 |
| <i>SASS6</i>      | NM_194292    | rs9518205  | 8.44E-03 | brown | 0.43600 |
| <i>SCGB1D1</i>    | NM_006552    | rs17291829 | 2.46E-02 | brown | 0.50612 |
| <i>SENP8</i>      | NM_145204    | rs10506635 | 4.04E-03 | brown | 0.18632 |
| <i>SIM1</i>       | NM_005068    | rs17611664 | 2.65E-03 | brown | 0.05169 |
| <i>SLAMF8</i>     | NM_020125    | rs2061039  | 3.26E-02 | brown | 0.02871 |
| <i>SLC12A2</i>    | NM_001046    | rs10505470 | 1.33E-02 | brown | 0.36636 |
| <i>SLC6A13</i>    | NM_016615    | rs10967209 | 1.34E-02 | brown | 0.54518 |
| <i>SLC7A11</i>    | NM_014331    | rs6577913  | 2.44E-02 | brown | 0.39376 |
| <i>SMAP</i>       | NM_014267    | NA         | NA       | brown | 0.52376 |
| <i>SOX6</i>       | NM_017508    | rs10508507 | 1.28E-03 | brown | 0.77146 |
| <i>SPACA4</i>     | NM_133498    | rs2397376  | 4.77E-04 | brown | 0.10152 |
| <i>SPAG4L</i>     | NM_080675    | NA         | NA       | brown | 0.02382 |
| <i>SPATA3</i>     | NM_139073    | rs1509583  | 2.90E-03 | brown | 0.04652 |
| <i>SRCRB4D</i>    | NM_080744    | rs2360999  | 8.06E-03 | brown | 0.03214 |
| <i>ST6GALNAC3</i> | NM_152996    | rs1176811  | 1.63E-03 | brown | 0.32905 |
| <i>SULT2B1</i>    | NM_004605    | rs12924662 | 2.48E-03 | brown | 0.36926 |
| <i>TADA2L</i>     | NM_001488    | NA         | NA       | brown | 0.68570 |
| <i>TAF1</i>       | NM_004606    | NA         | NA       | brown | 0.02577 |
| <i>TAOK2</i>      | NM_004783    | rs2394180  | 9.99E-04 | brown | 0.05811 |
| <i>TCEAL4</i>     | NM_024863    | NA         | NA       | brown | 0.01306 |
| <i>TCF7L2</i>     | NM_030756    | rs987694   | 1.13E-03 | brown | 0.17548 |
| <i>TDP1</i>       | NM_018319    | rs10801723 | 4.06E-03 | brown | 0.83579 |
| <i>TDRD3</i>      | NM_030794    | rs2726555  | 1.51E-03 | brown | 0.35809 |
| <i>TIAM2</i>      | NM_012454    | rs2209354  | 9.46E-04 | brown | 0.25216 |
| <i>TMEM45A</i>    | NM_018004    | rs12476979 | 1.71E-02 | brown | 0.19158 |
| <i>TNFRSF19</i>   | NM_018647    | rs3794764  | 2.81E-03 | brown | 0.05587 |
| <i>TPSG1</i>      | NM_012467    | rs8078073  | 5.87E-03 | brown | 0.20427 |
| <i>TRIM14</i>     | NM_033220    | rs11613360 | 3.74E-03 | brown | 0.05266 |
| <i>TRIM51</i>     | NM_032681    | NA         | NA       | brown | 0.20941 |
| <i>TRIM7</i>      | NM_203296    | rs12146116 | 3.30E-02 | brown | 0.35397 |
| <i>TSPAN18</i>    | NM_001031730 | NA         | NA       | brown | 0.06661 |
| <i>TSPYL5</i>     | NM_033512    | rs17542671 | 2.08E-02 | brown | 0.47258 |
| <i>TTC16</i>      | NM_144965    | rs3021211  | 1.18E-03 | brown | 0.34815 |
| <i>TXNDC10</i>    | NM_019022    | NA         | NA       | brown | 0.53578 |
| <i>UBR1</i>       | NM_174916    | rs4130762  | 2.88E-03 | brown | 0.81989 |



Supplementary Table 6

|                 |              |            |          |       |         |        |
|-----------------|--------------|------------|----------|-------|---------|--------|
| <i>UBXD5</i>    | NM_183008    | NA         | NA       | brown | 0.47048 |        |
| <i>UGCGL1</i>   | NM_001025777 | NA         | NA       | brown | 0.00151 |        |
| <i>UGT1A10</i>  | NM_019075    | rs6431631  | 2.45E-02 | brown | 0.15225 |        |
| <i>USP20</i>    | NM_001008563 | rs12547913 | 6.95E-03 | brown | 0.16791 |        |
| <i>USP51</i>    | NM_201286    | NA         | NA       | brown | 0.05188 |        |
| <i>WASPIP</i>   | NM_003387    | rs1469521  | 2.22E-02 | brown | 0.39165 |        |
| <i>WIPF1</i>    | NM_001077269 | rs11939600 | 2.09E-02 | brown | 0.31140 |        |
| <i>WNT16</i>    | NM_016087    | rs1610041  | 8.22E-02 | brown | 0.17103 |        |
| <i>WWOX</i>     | NM_130844    | rs12914385 | 1.94E-02 | brown | 0.06076 |        |
| <i>XRN2</i>     | NM_012255    | rs7999069  | 9.66E-03 | brown | 0.10171 |        |
| <i>ZC3HAV1</i>  | NM_024625    | rs2236426  | 1.32E-02 | brown | 0.32586 |        |
| <i>ZD52F10</i>  | NM_033317    | NA         | NA       | brown | 0.32634 |        |
| <i>ZDHHC21</i>  | NM_178566    | rs39968    | 6.05E-03 | brown | 0.58376 |        |
| <i>ZFP95</i>    | NM_014569    | NA         | NA       | brown | 0.04595 |        |
| <i>ZNF165</i>   | NM_003447    | rs1389155  | 7.18E-03 | brown | 0.23822 |        |
| <i>ZNF223</i>   | NM_013361    | rs17722373 | 1.53E-03 | brown | 0.54853 |        |
| <i>ZNF268</i>   | NM_003415    | rs2659624  | 5.61E-02 | brown | 0.03068 |        |
| <i>ZNF398</i>   | NM_020781    | rs12013571 | 2.00E-02 | brown | 0.14653 |        |
| <i>A2BP1</i>    | NM_145891    | NA         | NA       | cyan  | 0.00202 | autism |
| <i>A2ML1</i>    | NM_144670    | rs688523   | 3.62E-03 | cyan  | 0.02143 |        |
| <i>A4GNT</i>    | NM_016161    | rs16841327 | 3.40E-02 | cyan  | 0.00768 |        |
| <i>ABHD9</i>    | NM_024794    | NA         | NA       | cyan  | 0.09669 |        |
| <i>ABI3</i>     | NM_016428    | rs4774479  | 2.74E-03 | cyan  | 0.00062 |        |
| <i>ACRV1</i>    | NM_001612    | rs225539   | 6.30E-02 | cyan  | 0.00989 |        |
| <i>AFM</i>      | NM_001133    | rs7087762  | 8.13E-03 | cyan  | 0.00293 |        |
| <i>AQP6</i>     | NM_001652    | rs752870   | 3.68E-02 | cyan  | 0.24230 |        |
| <i>ARHGAP9</i>  | NM_032496    | rs2412664  | 3.48E-02 | cyan  | 0.00091 |        |
| <i>ARID4B</i>   | NM_016374    | rs12409696 | 2.19E-02 | cyan  | 0.19171 |        |
| <i>ATXN3</i>    | NM_030660    | rs12899930 | 6.43E-03 | cyan  | 0.67894 |        |
| <i>AVPR1A</i>   | NM_000706    | rs17828306 | 1.22E-03 | cyan  | 0.10276 | autism |
| <i>ba9F11.1</i> | NM_001001663 | NA         | NA       | cyan  | 0.00361 |        |
| <i>BCAM</i>     | NM_005581    | rs4073201  | 1.93E-02 | cyan  | 0.01827 |        |
| <i>BMP5</i>     | NM_021073    | rs12148857 | 5.11E-03 | cyan  | 0.59617 |        |
| <i>BTNL3</i>    | NM_197975    | rs1379410  | 5.26E-02 | cyan  | 0.25139 |        |
| <i>C18orf1</i>  | NM_181483    | rs17340021 | 5.02E-03 | cyan  | 0.08158 |        |
| <i>C1orf141</i> | NM_001013674 | rs2137704  | 4.09E-03 | cyan  | 0.00573 |        |
| <i>C1orf175</i> | NM_198547    | NA         | NA       | cyan  | 0.03974 |        |
| <i>C1orf38</i>  | NM_004848    | rs16962901 | 2.78E-03 | cyan  | 0.31067 |        |
| <i>C1QDC1</i>   | NM_023925    | NA         | NA       | cyan  | 0.08614 |        |
| <i>C21orf58</i> | NM_199071    | NA         | NA       | cyan  | 0.02451 |        |
| <i>C3orf30</i>  | NM_152539    | rs798997   | 2.68E-02 | cyan  | 0.13398 |        |
| <i>CA5B</i>     | NM_007220    | NA         | NA       | cyan  | 0.34432 |        |
| <i>CACNA1B</i>  | NM_000718    | rs1827916  | 1.42E-03 | cyan  | 0.39495 |        |
| <i>CARD9</i>    | NM_052813    | rs4829989  | 7.61E-02 | cyan  | 0.84899 |        |
| <i>CASC2</i>    | NM_201377    | NA         | NA       | cyan  | 0.06231 |        |
| <i>CCDC25</i>   | NM_001031708 | NA         | NA       | cyan  | 0.02804 |        |
| <i>CCDC68</i>   | NM_025214    | rs12609834 | 9.48E-03 | cyan  | 0.38521 |        |
| <i>CCR9</i>     | NM_031200    | rs2191031  | 7.22E-03 | cyan  | 0.05524 |        |
| <i>CDC14B</i>   | NM_003671    | rs729316   | 9.39E-04 | cyan  | 0.10726 |        |

Supplementary Table 6

|                 |              |            |          |      |         |        |
|-----------------|--------------|------------|----------|------|---------|--------|
| <i>CGA</i>      | NM_000735    | rs7031120  | 2.86E-02 | cyan | 0.00461 |        |
| <i>CHRNA6</i>   | NM_004198    | rs7214096  | 8.86E-03 | cyan | 0.26653 |        |
| <i>CLN8</i>     | NM_018941    | rs6714537  | 4.67E-03 | cyan | 0.01773 |        |
| <i>CLTCL1</i>   | NM_007098    | rs4504735  | 1.34E-03 | cyan | 0.19711 |        |
| <i>CNNM2</i>    | NM_199077    | rs9679687  | 3.11E-02 | cyan | 0.09988 |        |
| <i>CNTNAP4</i>  | NM_138994    | rs2134837  | 8.66E-04 | cyan | 0.02160 |        |
| <i>COCH</i>     | NM_004086    | rs1264581  | 7.52E-03 | cyan | 0.00170 |        |
| <i>COPG2</i>    | NM_012133    | rs9831813  | 1.21E-03 | cyan | 0.11545 |        |
| <i>CREB3L1</i>  | NM_052854    | rs10807337 | 9.08E-03 | cyan | 0.05467 |        |
| <i>CRLF2</i>    | NM_001012288 | NA         | NA       | cyan | 0.30000 |        |
| <i>CST9</i>     | NM_001008693 | rs414000   | 3.54E-04 | cyan | 0.41214 |        |
| <i>CTRC</i>     | NM_007272    | rs2543154  | 1.88E-03 | cyan | 0.44229 |        |
| <i>CUTA</i>     | NM_015921    | rs1419901  | 4.54E-03 | cyan | 0.02090 |        |
| <i>CXorf23</i>  | NM_198279    | NA         | NA       | cyan | 0.51991 |        |
| <i>CYP4Z2P</i>  | NR_002788    | rs5767120  | 9.46E-03 | cyan | 0.00197 |        |
| <i>CYS1</i>     | XM_927934    | NA         | NA       | cyan | 0.05035 |        |
| <i>DCLRE1C</i>  | NM_001033858 | rs268379   | 1.31E-03 | cyan | 0.42007 |        |
| <i>DCST1</i>    | NM_152494    | rs17428    | 3.35E-03 | cyan | 0.18502 |        |
| <i>DIRAS3</i>   | NM_004675    | rs3790688  | 9.99E-03 | cyan | 0.02132 |        |
| <i>DKK3</i>     | NM_015881    | rs279141   | 2.87E-03 | cyan | 0.01805 |        |
| <i>DNHD1</i>    | NM_144666    | rs7577180  | 2.47E-03 | cyan | 0.26562 |        |
| <i>DOCK2</i>    | NM_004946    | rs9364180  | 1.16E-03 | cyan | 0.13489 |        |
| <i>DUB3</i>     | NM_201402    | NA         | NA       | cyan | 0.08569 |        |
| <i>EED</i>      | NM_003797    | rs6849318  | 4.96E-03 | cyan | 0.00063 |        |
| <i>EHD3</i>     | NM_014600    | rs3130531  | 6.73E-03 | cyan | 0.00785 |        |
| <i>ELMO1</i>    | NM_014800    | rs13288123 | 1.27E-03 | cyan | 0.26110 |        |
| <i>EPHA8</i>    | NM_020526    | rs16910190 | 5.48E-04 | cyan | 0.10068 |        |
| <i>ETNK2</i>    | NM_018208    | rs10900550 | 3.94E-02 | cyan | 0.00138 |        |
| <i>FAM77D</i>   | NM_173688    | NA         | NA       | cyan | 0.85815 |        |
| <i>FANCB</i>    | NM_001018113 | NA         | NA       | cyan | 0.88585 |        |
| <i>FBLIM1</i>   | NM_017556    | rs8050881  | 2.84E-02 | cyan | 0.01388 |        |
| <i>FBXL8</i>    | NM_018378    | rs2371382  | 9.10E-02 | cyan | 0.04777 |        |
| <i>FFAR1</i>    | NM_005303    | rs6664294  | 2.40E-02 | cyan | 0.03173 |        |
| <i>FKBP1B</i>   | NM_054033    | rs10185680 | 1.37E-02 | cyan | 0.00727 |        |
| <i>FKBP2</i>    | NM_057092    | rs1059440  | 3.07E-03 | cyan | 0.34204 |        |
| <i>FLJ10120</i> | NR_002940    | NA         | NA       | cyan | 0.54433 |        |
| <i>FLJ11000</i> | NM_018295    | NA         | NA       | cyan | 0.86477 |        |
| <i>FLJ36090</i> | NM_153223    | NA         | NA       | cyan | 0.60215 |        |
| <i>FOXD4L1</i>  | NM_012184    | rs4573621  | 2.15E-02 | cyan | 0.23033 |        |
| <i>FOXP2</i>    | NM_014491    | rs35426    | 4.80E-04 | cyan | 0.00981 | autism |
| <i>FZD1</i>     | NM_003505    | rs6454789  | 1.70E-02 | cyan | 0.14624 |        |
| <i>GALNT9</i>   | NM_021808    | rs12576595 | 4.70E-02 | cyan | 0.00642 |        |
| <i>GAN</i>      | NM_022041    | rs6742151  | 1.60E-02 | cyan | 0.00808 |        |
| <i>GIYD2</i>    | NM_178044    | NA         | NA       | cyan | 0.00937 |        |
| <i>GLT8D1</i>   | NM_018446    | rs7601345  | 2.69E-02 | cyan | 0.03528 |        |
| <i>GNGT2</i>    | NM_031498    | rs4774479  | 2.74E-03 | cyan | 0.22915 |        |
| <i>GPR126</i>   | NM_001032394 | rs10216140 | 1.06E-03 | cyan | 0.03238 |        |
| <i>GPSM1</i>    | XM_939186    | NA         | NA       | cyan | 0.12252 |        |
| <i>GSR</i>      | NM_000637    | rs2480296  | 3.02E-03 | cyan | 0.78884 |        |

Supplementary Table 6

|                   |              |            |          |      |         |        |
|-------------------|--------------|------------|----------|------|---------|--------|
| <i>HAPLN2</i>     | NM_021817    | rs1990808  | 8.61E-02 | cyan | 0.00149 |        |
| <i>HOXB5</i>      | NM_002147    | rs1533371  | 2.07E-02 | cyan | 0.00135 |        |
| <i>HOXD13</i>     | NM_000523    | rs6829020  | 1.96E-01 | cyan | 0.55797 |        |
| <i>HS747E2A</i>   | NM_015370    | NA         | NA       | cyan | 0.01715 |        |
| <i>HSF1</i>       | NM_005526    | rs4681527  | 2.57E-02 | cyan | 0.00657 |        |
| <i>HTR7</i>       | NM_019859    | rs1374475  | 2.70E-03 | cyan | 0.21951 |        |
| <i>HYAL2</i>      | NM_033158    | rs2143725  | 1.37E-02 | cyan | 0.04291 |        |
| <i>ICOSLG</i>     | NM_015259    | rs11874319 | 2.41E-03 | cyan | 0.40759 |        |
| <i>IRF8</i>       | NM_002163    | rs4506862  | 1.21E-03 | cyan | 0.03645 |        |
| <i>IRS4</i>       | NM_003604    | NA         | NA       | cyan | 0.13313 |        |
| <i>KCNMB2</i>     | NM_005832    | rs1477779  | 1.16E-03 | cyan | 0.05436 |        |
| <i>KRTAP10-11</i> | NM_198692    | rs6508902  | 1.67E-03 | cyan | 0.18581 |        |
| <i>KRTHB3</i>     | NM_002282    | NA         | NA       | cyan | 0.03495 |        |
| <i>LBP</i>        | NM_004139    | rs10836560 | 1.56E-02 | cyan | 0.12270 |        |
| <i>LCE1E</i>      | NM_178353    | rs2536085  | 9.59E-03 | cyan | 0.03390 |        |
| <i>LOC116236</i>  | NM_198147    | NA         | NA       | cyan | 0.24594 |        |
| <i>LOC348180</i>  | NM_001012762 | NA         | NA       | cyan | 0.08256 |        |
| <i>LOC387911</i>  | NM_001007537 | NA         | NA       | cyan | 0.01614 |        |
| <i>LOC388199</i>  | NM_001013638 | NA         | NA       | cyan | 0.00130 |        |
| <i>LOC400464</i>  | NM_001013670 | NA         | NA       | cyan | 0.31365 |        |
| <i>LOC648303</i>  | XM_943915    | NA         | NA       | cyan | 0.00583 |        |
| <i>MAP3K10</i>    | NM_002446    | rs6063100  | 1.39E-02 | cyan | 0.01442 |        |
| <i>MDM4</i>       | NM_002393    | rs10458588 | 3.60E-01 | cyan | 0.02249 |        |
| <i>MGAT5</i>      | NM_002410    | rs9857979  | 8.80E-04 | cyan | 0.56371 |        |
| <i>MGC16291</i>   | NM_032770    | NA         | NA       | cyan | 0.04813 |        |
| <i>MGC39681</i>   | NM_174939    | NA         | NA       | cyan | 0.01299 |        |
| <i>MSH5</i>       | NM_002441    | rs4445     | 5.63E-03 | cyan | 0.23440 |        |
| <i>MTERF</i>      | NM_006980    | rs17530    | 1.35E-03 | cyan | 0.01311 |        |
| <i>MTMR3</i>      | NM_021090    | rs11840398 | 1.32E-03 | cyan | 0.29196 |        |
| <i>MUC16</i>      | NM_024690    | rs688523   | 3.62E-03 | cyan | 0.08855 |        |
| <i>MYCBPAP</i>    | NM_032133    | rs511310   | 4.96E-03 | cyan | 0.15362 |        |
| <i>NAGS</i>       | NM_153006    | rs1951325  | 7.63E-03 | cyan | 0.01879 |        |
| <i>NAIP</i>       | NM_004536    | NA         | NA       | cyan | 0.09324 |        |
| <i>NALP1</i>      | NM_001033053 | rs3923348  | 4.55E-03 | cyan | 0.04284 |        |
| <i>NCAM1</i>      | NM_000615    | rs4839202  | 7.48E-04 | cyan | 0.02308 |        |
| <i>NFKBIB</i>     | NM_001001716 | rs2838407  | 1.35E-02 | cyan | 0.06171 |        |
| <i>NGB</i>        | NM_021257    | rs1259590  | 3.03E-03 | cyan | 0.61136 |        |
| <i>NGFRAP1</i>    | NM_014380    | NA         | NA       | cyan | 0.10982 |        |
| <i>NLK</i>        | NM_016231    | rs414000   | 3.54E-04 | cyan | 0.16707 |        |
| <i>NRK</i>        | NM_198465    | NA         | NA       | cyan | 0.09056 |        |
| <i>NUDT12</i>     | NM_031438    | rs11820878 | 6.85E-03 | cyan | 0.75702 |        |
| <i>OR2A14</i>     | NM_001001659 | rs12466715 | 3.10E-02 | cyan | 0.36312 |        |
| <i>OR2H1</i>      | NM_030883    | rs1231682  | 5.54E-03 | cyan | 0.00180 |        |
| <i>OR4S2</i>      | NM_001004059 | rs6014947  | 6.54E-03 | cyan | 0.00537 |        |
| <i>OR6N2</i>      | NM_001005278 | rs4352424  | 2.81E-03 | cyan | 0.01804 |        |
| <i>OSCAR</i>      | NM_133169    | rs482355   | 6.65E-03 | cyan | 0.03537 |        |
| <i>PARK2</i>      | NM_013987    | rs11962721 | 6.53E-03 | cyan | 0.45478 | autism |
| <i>PARP8</i>      | NM_024615    | rs2526752  | 1.92E-03 | cyan | 0.13770 |        |
| <i>PCDHAC2</i>    | NM_031883    | rs9886312  | 3.38E-02 | cyan | 0.04119 |        |

Supplementary Table 6

|                  |              |            |          |      |         |
|------------------|--------------|------------|----------|------|---------|
| <i>PFKFB2</i>    | NM_006212    | rs11799614 | 4.46E-01 | cyan | 0.72944 |
| <i>PIK3CA</i>    | NM_006218    | rs1379410  | 5.26E-02 | cyan | 0.34069 |
| <i>PLEKHN1</i>   | NM_032129    | rs570869   | 9.34E-03 | cyan | 0.50942 |
| <i>PLK3</i>      | NM_004073    | rs6066149  | 2.75E-03 | cyan | 0.00342 |
| <i>PLXNA4B</i>   | NM_181775    | NA         | NA       | cyan | 0.00937 |
| <i>PPL</i>       | NM_002705    | rs6712088  | 3.32E-03 | cyan | 0.01329 |
| <i>PPP1R14D</i>  | NM_017726    | rs395157   | 6.06E-03 | cyan | 0.14072 |
| <i>PRKACB</i>    | NM_207578    | rs1596552  | 9.53E-03 | cyan | 0.03606 |
| <i>PRKAR1A</i>   | NM_212471    | rs2152670  | 7.59E-03 | cyan | 0.04547 |
| <i>PRKCABP</i>   | NM_012407    | rs10197807 | 4.20E-03 | cyan | 0.07687 |
| <i>PXK</i>       | NM_017771    | rs17254640 | 1.05E-03 | cyan | 0.13346 |
| <i>PYGM</i>      | NM_005609    | rs2622274  | 6.77E-02 | cyan | 0.01436 |
| <i>QPCT</i>      | NM_012413    | rs2835624  | 1.01E-02 | cyan | 0.29418 |
| <i>RAB3IP</i>    | NM_001024647 | rs12754452 | 1.14E-03 | cyan | 0.54770 |
| <i>RASA4</i>     | NM_006989    | rs7631720  | 4.06E-03 | cyan | 0.72969 |
| <i>RASSF8</i>    | NM_007211    | rs4307059  | 1.07E-05 | cyan | 0.05568 |
| <i>RBPM5</i>     | NM_006867    | rs4422383  | 2.46E-03 | cyan | 0.07213 |
| <i>RIPK3</i>     | NM_006871    | rs7148384  | 1.47E-02 | cyan | 0.51819 |
| <i>RNF6</i>      | NM_183044    | rs1334057  | 5.25E-03 | cyan | 0.00492 |
| <i>RPL23AP13</i> | NR_002229    | NA         | NA       | cyan | 0.45211 |
| <i>RPS26L1</i>   | NR_002309    | NA         | NA       | cyan | 0.00091 |
| <i>RSPO2</i>     | NM_178565    | rs2514840  | 6.12E-04 | cyan | 0.25616 |
| <i>RTP2</i>      | NM_001004312 | rs1325224  | 6.08E-02 | cyan | 0.45680 |
| <i>S100A2</i>    | NM_005978    | rs17320457 | 7.31E-02 | cyan | 0.59276 |
| <i>SAV1</i>      | NM_021818    | rs1037676  | 1.36E-02 | cyan | 0.40794 |
| <i>SFTPG</i>     | NM_205854    | NA         | NA       | cyan | 0.19191 |
| <i>SLC16A3</i>   | NM_004207    | rs4853333  | 9.60E-03 | cyan | 0.38718 |
| <i>SLC22A4</i>   | NM_003059    | rs12547913 | 6.95E-03 | cyan | 0.57188 |
| <i>SLC45A2</i>   | NM_001012509 | rs40507    | 3.97E-03 | cyan | 0.02450 |
| <i>SLC8A3</i>    | NM_033262    | rs17086457 | 8.19E-04 | cyan | 0.41837 |
| <i>SLC9A3</i>    | NM_004174    | rs936469   | 3.30E-03 | cyan | 0.01027 |
| <i>SNCG</i>      | NM_003087    | rs6465190  | 2.49E-02 | cyan | 0.01144 |
| <i>SNORD36C</i>  | NR_000016    | rs7428024  | 2.75E-02 | cyan | 0.06775 |
| <i>STAU</i>      | NM_017453    | rs4794301  | 9.80E-04 | cyan | 0.59213 |
| <i>TAS2R8</i>    | NM_023918    | rs4841462  | 6.87E-03 | cyan | 0.02144 |
| <i>TERF1</i>     | NM_003218    | rs555779   | 3.13E-03 | cyan | 0.00610 |
| <i>THAP9</i>     | NM_024672    | rs2788099  | 1.34E-03 | cyan | 0.27746 |
| <i>TMEM106B</i>  | NM_018374    | rs2907283  | 1.38E-02 | cyan | 0.31991 |
| <i>TRIM29</i>    | NM_012101    | rs7562894  | 3.64E-02 | cyan | 0.32208 |
| <i>TRNT1</i>     | NM_016000    | NA         | NA       | cyan | 0.00303 |
| <i>TROVE2</i>    | NM_004600    | rs6661522  | 1.98E-01 | cyan | 0.01253 |
| <i>TTC7A</i>     | NM_020458    | rs4794301  | 9.80E-04 | cyan | 0.48576 |
| <i>UBXD5</i>     | NM_145345    | NA         | NA       | cyan | 0.04913 |
| <i>UBXD6</i>     | NM_005671    | NA         | NA       | cyan | 0.02094 |
| <i>UCN2</i>      | NM_033199    | rs2267844  | 1.43E-02 | cyan | 0.01416 |
| <i>USH1G</i>     | NM_173477    | rs8078766  | 1.17E-02 | cyan | 0.20474 |
| <i>UTY</i>       | NM_182659    | NA         | NA       | cyan | 0.01661 |
| <i>VMD2L1</i>    | NM_017682    | NA         | NA       | cyan | 0.00169 |
| <i>VN1R1</i>     | NM_020633    | rs17066966 | 1.27E-02 | cyan | 0.68879 |

Supplementary Table 6

|                  |              |            |          |          |         |
|------------------|--------------|------------|----------|----------|---------|
| <i>VPS13A</i>    | NM_033305    | rs1344085  | 1.39E-03 | cyan     | 0.72226 |
| <i>VTN</i>       | NM_000638    | rs11564334 | 1.22E-02 | cyan     | 0.00295 |
| <i>WDR52</i>     | NM_018338    | rs6733541  | 3.80E-03 | cyan     | 0.43235 |
| <i>WDR5B</i>     | NM_019069    | rs13320117 | 1.01E-02 | cyan     | 1.00000 |
| <i>WDR78</i>     | NM_024763    | rs9911654  | 6.65E-04 | cyan     | 0.01476 |
| <i>WTAP</i>      | NM_152857    | rs10062843 | 4.90E-02 | cyan     | 0.01054 |
| <i>YSK4</i>      | NM_001018046 | rs3764942  | 3.96E-04 | cyan     | 0.00051 |
| <i>ZBTB2</i>     | NM_020861    | rs8230     | 1.38E-02 | cyan     | 0.00631 |
| <i>ZNF181</i>    | NM_001029997 | rs7147817  | 7.33E-04 | cyan     | 0.35906 |
| <i>ZNF273</i>    | NM_021148    | rs683979   | 1.65E-02 | cyan     | 0.03506 |
| <i>ZNF493</i>    | NM_001076678 | rs7003897  | 2.76E-03 | cyan     | 0.12444 |
| <i>ZNF547</i>    | NM_173631    | rs862707   | 1.48E-02 | cyan     | 0.17159 |
| <i>ZNF555</i>    | NM_152791    | rs956764   | 2.69E-03 | cyan     | 0.64073 |
| <i>ZNF6</i>      | NM_021998    | NA         | NA       | cyan     | 0.16675 |
| <i>ZNF610</i>    | NM_173530    | rs2964206  | 2.22E-03 | cyan     | 0.29494 |
| <i>ZNF624</i>    | NM_020787    | rs1927631  | 1.30E-03 | cyan     | 0.03684 |
| <i>ZNFN1A3</i>   | NM_183231    | rs2701516  | 1.79E-04 | cyan     | 0.13993 |
| <i>ZP3</i>       | NM_007155    | rs2360999  | 8.06E-03 | cyan     | 0.02164 |
| <i>ZSCAN1</i>    | NM_182572    | rs6686582  | 1.94E-03 | cyan     | 0.08202 |
| <i>ADAR</i>      | NM_001025107 | rs214972   | 1.23E-02 | darkcyan | 0.20761 |
| <i>ASCC3</i>     | NM_022091    | rs11769397 | 5.26E-02 | darkcyan | 0.19132 |
| <i>BRWD3</i>     | NM_153252    | NA         | NA       | darkcyan | 0.00141 |
| <i>C9orf85</i>   | NM_182505    | rs6566045  | 1.95E-05 | darkcyan | 0.12044 |
| <i>CACNB1</i>    | NM_000723    | rs13356779 | 8.15E-04 | darkcyan | 0.82151 |
| <i>CDC42</i>     | NM_044472    | rs2473322  | 3.38E-03 | darkcyan | 0.28568 |
| <i>CDYL2</i>     | NM_152342    | rs7171517  | 2.38E-03 | darkcyan | 0.27866 |
| <i>CLIC5</i>     | NM_016929    | rs215347   | 6.04E-04 | darkcyan | 0.38634 |
| <i>DEFB105A</i>  | NM_152250    | NA         | NA       | darkcyan | 0.42579 |
| <i>EPS8L1</i>    | NM_017729    | rs1353546  | 1.02E-02 | darkcyan | 0.80854 |
| <i>GABRE</i>     | NM_021990    | NA         | NA       | darkcyan | 0.13735 |
| <i>GABRQ</i>     | NM_018558    | NA         | NA       | darkcyan | 0.03554 |
| <i>GPRASP1</i>   | NM_014710    | NA         | NA       | darkcyan | 0.38725 |
| <i>HOXD8</i>     | NM_019558    | rs387933   | 2.52E-01 | darkcyan | 0.71171 |
| <i>HTR4</i>      | NM_199453    | rs11971205 | 2.38E-03 | darkcyan | 0.25188 |
| <i>LIPH</i>      | NM_139248    | rs1872445  | 2.32E-02 | darkcyan | 0.97862 |
| <i>LIPK</i>      | NM_001080518 | rs12571524 | 1.05E-02 | darkcyan | 1.00000 |
| <i>LOC198437</i> | NM_001007125 | NA         | NA       | darkcyan | 0.03992 |
| <i>LOC653685</i> | XM_928912    | NA         | NA       | darkcyan | 0.08485 |
| <i>OR4D1</i>     | NM_012374    | rs11776276 | 6.34E-03 | darkcyan | 0.64371 |
| <i>PIWIL1</i>    | NM_004764    | rs12414590 | 1.73E-03 | darkcyan | 0.45791 |
| <i>RUNX3</i>     | NM_001031680 | rs4820681  | 1.61E-03 | darkcyan | 0.38396 |
| <i>SMR3B</i>     | NM_006685    | rs2777864  | 3.64E-02 | darkcyan | 0.34930 |
| <i>SNX7</i>      | NM_152238    | rs1921023  | 4.97E-03 | darkcyan | 0.07761 |
| <i>SPATA7</i>    | NM_018418    | rs11201937 | 3.84E-02 | darkcyan | 0.00018 |
| <i>STAP2</i>     | NM_017720    | rs3912089  | 1.14E-03 | darkcyan | 0.03513 |
| <i>TNNI2</i>     | NM_003282    | rs3935866  | 2.06E-02 | darkcyan | 0.59523 |
| <i>TSC22D1</i>   | NM_183422    | rs6447330  | 3.43E-03 | darkcyan | 0.00241 |
| <i>TTY6</i>      | NR_001527    | NA         | NA       | darkcyan | 0.66018 |
| <i>UPK1A</i>     | NM_007000    | rs9380991  | 2.73E-02 | darkcyan | 0.15940 |

Supplementary Table 6

|                  |                 |            |          |             |         |
|------------------|-----------------|------------|----------|-------------|---------|
| <i>VPS24</i>     | NM_016079       | rs8016092  | 4.67E-03 | darkcyan    | 0.85998 |
| <i>WNT2B</i>     | NM_004185       | rs2396623  | 6.23E-03 | darkcyan    | 0.08601 |
|                  | 5-Sep NM_080416 | NA         | NA       | darkmagenta | 0.07717 |
| <i>A2M</i>       | NM_000014       | rs293184   | 3.31E-03 | darkmagenta | 0.42406 |
| <i>ABCA1</i>     | NM_005502       | rs2769917  | 1.13E-02 | darkmagenta | 0.96503 |
| <i>ABCD1</i>     | NM_000033       | NA         | NA       | darkmagenta | 0.15729 |
| <i>ABHD2</i>     | NM_152924       | rs9871262  | 1.72E-02 | darkmagenta | 0.00913 |
| <i>ACOX2</i>     | NM_003500       | rs2024882  | 2.74E-03 | darkmagenta | 0.94014 |
| <i>ACTA1</i>     | NM_001100       | rs4536647  | 7.77E-02 | darkmagenta | 0.08204 |
| <i>ADAMTS14</i>  | NM_139155       | rs1727668  | 5.62E-03 | darkmagenta | 0.05687 |
| <i>ADAMTS20</i>  | NM_175851       | NA         | NA       | darkmagenta | 0.00190 |
| <i>ADRA2C</i>    | NM_000683       | rs6738683  | 2.39E-03 | darkmagenta | 0.09084 |
| <i>AGPAT4</i>    | NM_001012734    | NA         | NA       | darkmagenta | 0.80270 |
| <i>AKT2</i>      | NM_001626       | rs1943969  | 1.15E-02 | darkmagenta | 0.00974 |
| <i>AMPD3</i>     | NM_001025389    | rs10946418 | 2.38E-03 | darkmagenta | 0.04718 |
| <i>AMPH</i>      | NM_001635       | rs1858740  | 5.59E-04 | darkmagenta | 0.75482 |
| <i>APITD1</i>    | NM_198544       | NA         | NA       | darkmagenta | 0.85732 |
| <i>ARID4A</i>    | NM_002892       | rs10747826 | 2.33E-02 | darkmagenta | 0.00259 |
| <i>ARL4A</i>     | NM_001037164    | rs2075508  | 2.61E-02 | darkmagenta | 0.00198 |
| <i>ARPP-21</i>   | NM_001025068    | NA         | NA       | darkmagenta | 0.24443 |
| <i>ASIP</i>      | NM_001672       | rs1986309  | 1.27E-02 | darkmagenta | 0.81936 |
| <i>BAGE2</i>     | NM_182482       | rs6432057  | 2.89E-03 | darkmagenta | 0.22668 |
| <i>BAGE5</i>     | NM_182484       | rs6432057  | 2.89E-03 | darkmagenta | 0.24973 |
| <i>BCOR</i>      | NM_017745       | NA         | NA       | darkmagenta | 0.67895 |
| <i>BCOR</i>      | NM_020926       | NA         | NA       | darkmagenta | 0.62318 |
| <i>BCOR</i>      | NM_020926       | NA         | NA       | darkmagenta | 0.09772 |
| <i>BDH</i>       | NM_004051       | NA         | NA       | darkmagenta | 0.02053 |
| <i>BM88</i>      | NM_016564       | NA         | NA       | darkmagenta | 0.58128 |
| <i>BMF</i>       | NM_001003942    | rs12194275 | 3.66E-03 | darkmagenta | 0.01250 |
| <i>BTBD4</i>     | NM_025224       | NA         | NA       | darkmagenta | 0.82084 |
| <i>C12orf45</i>  | NM_152318       | rs2399931  | 4.14E-03 | darkmagenta | 0.01972 |
| <i>C13orf18</i>  | NM_025113       | rs2428684  | 4.57E-03 | darkmagenta | 0.39909 |
| <i>C13orf21</i>  | NM_001010897    | NA         | NA       | darkmagenta | 0.34999 |
| <i>C14orf94</i>  | NM_017815       | NA         | NA       | darkmagenta | 0.54185 |
| <i>C18orf45</i>  | NM_032933       | rs2503349  | 2.70E-04 | darkmagenta | 0.05043 |
| <i>C1orf89</i>   | NM_030907       | rs11133844 | 7.53E-03 | darkmagenta | 0.12710 |
| <i>C1QTNF1</i>   | NM_030968       | rs3925322  | 2.29E-02 | darkmagenta | 0.59479 |
| <i>C1QTNF1</i>   | NM_198594       | rs3925322  | 2.29E-02 | darkmagenta | 1.00000 |
| <i>C1QTNF6</i>   | NM_031910       | rs229566   | 6.84E-03 | darkmagenta | 0.36799 |
| <i>C20orf108</i> | NM_080821       | rs1498821  | 3.94E-04 | darkmagenta | 0.29050 |
| <i>C3orf54</i>   | NM_203370       | rs2275597  | 9.97E-03 | darkmagenta | 0.44267 |
| <i>C4orf6</i>    | NM_005750       | rs6500699  | 7.73E-03 | darkmagenta | 0.22412 |
| <i>C9orf116</i>  | NM_144654       | rs13290613 | 4.42E-03 | darkmagenta | 0.71378 |
| <i>C9orf116</i>  | NM_144654       | rs13290613 | 4.42E-03 | darkmagenta | 0.82353 |
| <i>C9orf4</i>    | NM_014334       | rs12637194 | 2.03E-02 | darkmagenta | 0.40961 |
| <i>C9orf58</i>   | NM_001002260    | NA         | NA       | darkmagenta | 0.80974 |
| <i>C9orf58</i>   | NM_031426       | NA         | NA       | darkmagenta | 0.98210 |
| <i>CA12</i>      | NM_001218       | rs1036244  | 6.36E-03 | darkmagenta | 0.92236 |
| <i>CABP7</i>     | NM_182527       | rs1331894  | 6.96E-04 | darkmagenta | 0.42201 |

Supplementary Table 6

|                       |              |            |          |             |         |        |
|-----------------------|--------------|------------|----------|-------------|---------|--------|
| <i>CABYR</i>          | NM_153768    | rs11832352 | 1.70E-02 | darkmagenta | 0.13107 |        |
| <i>CACNA1H</i>        | NM_001005407 | rs7208333  | 5.04E-04 | darkmagenta | 0.22190 | autism |
| <i>CAPN5</i>          | NM_004055    | rs830786   | 4.12E-03 | darkmagenta | 0.97476 |        |
| <i>CASP8</i>          | NM_033355    | rs4951272  | 3.41E-02 | darkmagenta | 0.20142 |        |
| <i>CASP8</i>          | NM_033358    | rs4951272  | 3.41E-02 | darkmagenta | 0.25373 |        |
| <i>CCDC4</i>          | NM_207406    | NA         | NA       | darkmagenta | 0.01415 |        |
| <i>CCNH</i>           | NM_001239    | rs12887999 | 2.80E-02 | darkmagenta | 0.00175 |        |
| <i>CDH24</i>          | NM_144985    | rs2000191  | 1.64E-03 | darkmagenta | 0.05535 |        |
| <i>CDH8</i>           | NM_001796    | rs13064050 | 5.02E-03 | darkmagenta | 0.00142 |        |
| <i>CEACAM3</i>        | NM_001815    | rs2258342  | 5.25E-03 | darkmagenta | 0.00591 |        |
| <i>CECR6</i>          | NM_031890    | rs3008725  | 1.73E-02 | darkmagenta | 0.56420 |        |
| <i>CELSR2</i>         | NM_001408    | rs7654972  | 1.09E-02 | darkmagenta | 0.51948 |        |
| <i>CHD7</i>           | NM_017780    | rs17828306 | 1.22E-03 | darkmagenta | 0.83599 |        |
| <i>CHD9</i>           | NM_025134    | rs1028145  | 8.24E-05 | darkmagenta | 0.75515 |        |
| <i>CLDN2</i>          | NM_020384    | NA         | NA       | darkmagenta | 0.88109 |        |
| <i>CNTN3</i>          | NM_020872    | rs9889410  | 2.20E-03 | darkmagenta | 0.12240 |        |
| <i>COBL</i>           | NM_015198    | rs8017705  | 3.36E-03 | darkmagenta | 0.17861 |        |
| <i>CPXM</i>           | NM_019609    | NA         | NA       | darkmagenta | 0.42533 |        |
| <i>CPXM2</i>          | NM_198148    | rs7602423  | 1.02E-04 | darkmagenta | 0.72482 |        |
| <i>CPZ</i>            | NM_001014447 | rs3794318  | 4.29E-03 | darkmagenta | 0.39122 |        |
| <i>CR1</i>            | XM_936516    | NA         | NA       | darkmagenta | 0.00025 |        |
| <i>CRYAA</i>          | NM_000394    | rs5765901  | 1.16E-02 | darkmagenta | 0.44099 |        |
| <i>CSPG3</i>          | NM_004386    | NA         | NA       | darkmagenta | 0.71546 |        |
| <i>CTH</i>            | NM_153742    | rs4737995  | 1.48E-03 | darkmagenta | 0.09248 |        |
| <i>CXCL12</i>         | NM_001033886 | rs1883833  | 8.04E-03 | darkmagenta | 0.60674 |        |
| <i>CXCL12</i>         | NM_199168    | rs1883833  | 8.04E-03 | darkmagenta | 0.72668 |        |
| <i>CYP51A1</i>        | NM_000786    | rs12899930 | 6.43E-03 | darkmagenta | 0.03376 |        |
| <i>DCT</i>            | NM_001922    | rs11107845 | 4.18E-03 | darkmagenta | 0.88818 |        |
| <i>DCUN1D3</i>        | NM_173475    | rs2218258  | 2.25E-02 | darkmagenta | 0.23479 |        |
| <i>DDC</i>            | NM_000790    | rs913465   | 3.20E-03 | darkmagenta | 0.74759 |        |
| <i>DGCR5</i>          | NR_002733    | rs5993462  | 2.74E-03 | darkmagenta | 0.18619 |        |
| <i>DKFZp666G057</i>   | NM_001008226 | NA         | NA       | darkmagenta | 0.02670 |        |
| <i>DKFZP686A01247</i> | NM_014988    | NA         | NA       | darkmagenta | 0.81361 |        |
| <i>DLG2</i>           | NM_001364    | rs972827   | 1.26E-03 | darkmagenta | 0.61895 |        |
| <i>DOK5</i>           | NM_018431    | rs37787    | 7.65E-03 | darkmagenta | 0.82970 |        |
| <i>DOK6</i>           | NM_152721    | rs17827524 | 2.65E-03 | darkmagenta | 0.46551 |        |
| <i>DPH3</i>           | NM_001047434 | rs9442235  | 2.63E-03 | darkmagenta | 0.00924 |        |
| <i>ECHDC3</i>         | NM_024693    | rs210920   | 1.57E-02 | darkmagenta | 0.68482 |        |
| <i>ECM1</i>           | NM_004425    | rs7605678  | 3.11E-02 | darkmagenta | 0.00386 |        |
| <i>ECM1</i>           | NM_022664    | rs7605678  | 3.11E-02 | darkmagenta | 0.14281 |        |
| <i>ECRG4</i>          | NM_032411    | NA         | NA       | darkmagenta | 0.36683 |        |
| <i>EFNA2</i>          | NM_001405    | rs4640842  | 1.68E-04 | darkmagenta | 0.04106 |        |
| <i>EHBP1</i>          | NM_015252    | rs10409409 | 1.57E-03 | darkmagenta | 0.77628 |        |
| <i>ELN</i>            | NM_001081754 | rs7215957  | 2.79E-03 | darkmagenta | 0.58859 |        |
| <i>ERBB2IP</i>        | NM_018695    | rs10513964 | 5.92E-03 | darkmagenta | 0.17318 |        |
| <i>ERV3</i>           | NM_001007253 | rs696014   | 5.31E-03 | darkmagenta | 0.68087 |        |
| <i>FAM113B</i>        | NM_138371    | rs2191031  | 7.22E-03 | darkmagenta | 0.86953 |        |
| <i>FAM59A</i>         | NM_022751    | rs2614048  | 1.98E-03 | darkmagenta | 0.68359 |        |
| <i>FAM78B</i>         | NM_001017961 | rs4642869  | 1.71E-02 | darkmagenta | 0.00555 |        |

Supplementary Table 6

|                     |              |            |          |             |         |          |
|---------------------|--------------|------------|----------|-------------|---------|----------|
| <i>FAM84B</i>       | NM_174911    | rs4882789  | 8.27E-03 | darkmagenta | 0.78701 |          |
| <i>FGF18</i>        | NM_033649    | NA         | NA       | darkmagenta | 0.09688 |          |
| <i>FGFR3</i>        | NM_000142    | rs1124200  | 4.46E-03 | darkmagenta | 0.77162 |          |
| <i>FLG</i>          | NM_002016    | rs9397194  | 2.59E-02 | darkmagenta | 0.11004 |          |
| <i>FLJ20054</i>     | NM_019049    | NA         | NA       | darkmagenta | 0.61807 |          |
| <i>FLJ37078</i>     | NM_153043    | NA         | NA       | darkmagenta | 0.15601 |          |
| <i>FLJ43339</i>     | NM_207380    | NA         | NA       | darkmagenta | 0.38678 |          |
| <i>FLJ46536</i>     | NM_198483    | NA         | NA       | darkmagenta | 0.00930 |          |
| <i>FOXN4</i>        | NM_213596    | rs1999487  | 4.23E-03 | darkmagenta | 0.27033 |          |
| <i>FO XO1A</i>      | NM_002015    | NA         | NA       | darkmagenta | 0.65457 |          |
| <i>FRAS1</i>        | NM_025074    | rs7171517  | 2.38E-03 | darkmagenta | 0.03918 |          |
| <i>G0S2</i>         | NM_015714    | rs6710342  | 1.53E-02 | darkmagenta | 0.49004 |          |
| <i>GAD2</i>         | NM_000818    | rs12031946 | 6.41E-04 | darkmagenta | 0.92466 | epilepsy |
| <i>GALNAC4S-6ST</i> | NM_015892    | NA         | NA       | darkmagenta | 0.65233 |          |
| <i>GAS2L3</i>       | NM_174942    | rs10509714 | 1.22E-03 | darkmagenta | 0.44494 |          |
| <i>GNAL</i>         | NM_182978    | rs2304402  | 1.24E-03 | darkmagenta | 0.00880 |          |
| <i>GNAS</i>         | NM_080425    | rs2968217  | 2.91E-03 | darkmagenta | 0.03742 |          |
| <i>GOLGA</i>        | NM_018652    | NA         | NA       | darkmagenta | 0.02592 |          |
| <i>GPBAR1</i>       | NM_001077191 | rs2253641  | 1.43E-01 | darkmagenta | 0.01986 |          |
| <i>GRIA4</i>        | NM_000829    | rs4946582  | 3.63E-03 | darkmagenta | 0.14225 |          |
| <i>GSTZ1</i>        | NM_145871    | rs9926888  | 3.76E-02 | darkmagenta | 0.65608 |          |
| <i>GTPBP3</i>       | NM_133644    | rs1476080  | 1.46E-02 | darkmagenta | 0.11438 |          |
| <i>HAP1</i>         | NM_003949    | NA         | NA       | darkmagenta | 0.00288 |          |
| <i>HAS2</i>         | NM_005328    | rs1432309  | 1.65E-02 | darkmagenta | 0.10729 |          |
| <i>HBQ1</i>         | NM_005331    | rs727056   | 2.01E-03 | darkmagenta | 0.50373 |          |
| <i>HDAC5</i>        | NM_001015053 | rs9369119  | 6.13E-04 | darkmagenta | 0.21571 |          |
| <i>HEBP1</i>        | NM_015987    | rs13145438 | 8.10E-04 | darkmagenta | 0.67459 |          |
| <i>HEBP2</i>        | NM_014320    | rs2811728  | 1.50E-01 | darkmagenta | 0.26671 |          |
| <i>HES7</i>         | NM_032580    | rs16879418 | 7.85E-03 | darkmagenta | 0.02041 |          |
| <i>HIST1H4J</i>     | NM_021968    | rs3794405  | 4.95E-03 | darkmagenta | 0.09235 |          |
| <i>HIST2H2BE</i>    | NM_003528    | rs30325    | 1.25E-02 | darkmagenta | 0.64588 |          |
| <i>HMBOX1</i>       | NM_024567    | rs4308905  | 1.83E-04 | darkmagenta | 0.00678 |          |
| <i>HNT</i>          | NM_001048209 | NA         | NA       | darkmagenta | 0.94596 |          |
| <i>HPSE</i>         | NM_006665    | rs4506862  | 1.21E-03 | darkmagenta | 0.72853 |          |
| <i>HRASLS</i>       | NM_020386    | rs16835406 | 1.57E-01 | darkmagenta | 0.41774 |          |
| <i>HSPA12A</i>      | NM_025015    | rs3847973  | 2.72E-02 | darkmagenta | 0.86603 |          |
| <i>IER3IP1</i>      | NM_016097    | rs7558605  | 1.43E-02 | darkmagenta | 0.01007 |          |
| <i>IGFBP6</i>       | NM_002178    | rs1028145  | 8.24E-05 | darkmagenta | 0.89746 |          |
| <i>IL17RD</i>       | NM_017563    | rs950844   | 1.89E-02 | darkmagenta | 0.44544 |          |
| <i>IL17RD</i>       | NM_001080973 | NA         | NA       | darkmagenta | 0.52244 |          |
| <i>IL6ST</i>        | NM_002184    | rs13265893 | 1.02E-02 | darkmagenta | 0.33372 |          |
| <i>IL6ST</i>        | NM_175767    | rs13265893 | 1.02E-02 | darkmagenta | 0.26691 |          |
| <i>ILK</i>          | NM_001014794 | rs11789777 | 9.36E-04 | darkmagenta | 0.29101 |          |
| <i>ITGB7</i>        | NM_000889    | rs641056   | 6.69E-03 | darkmagenta | 0.61325 | autism   |
| <i>ITPR3</i>        | NM_002224    | rs729424   | 3.22E-03 | darkmagenta | 0.54627 |          |
| <i>JUB</i>          | NM_032876    | rs4655044  | 1.04E-02 | darkmagenta | 0.00070 |          |
| <i>KBTBD11</i>      | NM_014867    | rs12699477 | 1.54E-02 | darkmagenta | 0.73319 |          |
| <i>KCNIP4</i>       | NM_025221    | rs8043036  | 2.42E-03 | darkmagenta | 0.71565 |          |
| <i>KHDRBS3</i>      | NM_006558    | rs6635478  | 4.29E-03 | darkmagenta | 0.56870 |          |



Supplementary Table 6

|                  |              |            |          |             |         |
|------------------|--------------|------------|----------|-------------|---------|
| <i>KIAA0182</i>  | NM_014615    | rs12654219 | 5.21E-03 | darkmagenta | 0.67811 |
| <i>KIAA0672</i>  | NM_014859    | NA         | NA       | darkmagenta | 0.01521 |
| <i>KIAA0922</i>  | NM_015196    | rs2862073  | 9.57E-04 | darkmagenta | 0.76603 |
| <i>KIAA1024</i>  | NM_015206    | rs717387   | 1.36E-02 | darkmagenta | 0.64593 |
| <i>KIAA1026</i>  | NM_015209    | NA         | NA       | darkmagenta | 0.40459 |
| <i>KLF12</i>     | NM_016285    | NA         | NA       | darkmagenta | 0.12259 |
| <i>LASS6</i>     | NM_203463    | rs259916   | 2.84E-03 | darkmagenta | 0.73446 |
| <i>LEFTY2</i>    | NM_003240    | rs2273405  | 2.72E-01 | darkmagenta | 0.94422 |
| <i>LEPREL1</i>   | NM_018192    | rs7415619  | 5.70E-02 | darkmagenta | 0.91190 |
| <i>LFNG</i>      | NM_001040168 | rs9663489  | 1.39E-02 | darkmagenta | 0.67460 |
| <i>LGALS3BP</i>  | NM_005567    | rs6700161  | 2.10E-02 | darkmagenta | 0.86920 |
| <i>LHFPL2</i>    | NM_005779    | rs9544834  | 1.32E-03 | darkmagenta | 0.28399 |
| <i>LINGO4</i>    | NM_001004432 | rs1546632  | 4.81E-04 | darkmagenta | 0.00086 |
| <i>LIPE</i>      | NM_005357    | rs698334   | 1.06E-03 | darkmagenta | 0.03936 |
| <i>LOC124842</i> | NM_207313    | NA         | NA       | darkmagenta | 0.83652 |
| <i>LOC283174</i> | NM_001001873 | NA         | NA       | darkmagenta | 0.74414 |
| <i>LOC387856</i> | NM_001013635 | NA         | NA       | darkmagenta | 0.42553 |
| <i>LOC387856</i> | XM_937099    | NA         | NA       | darkmagenta | 0.85987 |
| <i>LOC388389</i> | NM_213607    | NA         | NA       | darkmagenta | 0.49721 |
| <i>LOC399947</i> | NM_207645    | NA         | NA       | darkmagenta | 0.04353 |
| <i>LOC402573</i> | NM_001004323 | NA         | NA       | darkmagenta | 0.13036 |
| <i>LOC642323</i> | XM_925863    | NA         | NA       | darkmagenta | 0.14178 |
| <i>LOC644615</i> | XM_927730    | NA         | NA       | darkmagenta | 0.30710 |
| <i>LOC648293</i> | XM_944019    | NA         | NA       | darkmagenta | 0.90407 |
| <i>LOC650798</i> | XM_942582    | NA         | NA       | darkmagenta | 0.00451 |
| <i>LOC653709</i> | XM_929105    | NA         | NA       | darkmagenta | 0.01142 |
| <i>LOC90586</i>  | NR_002773    | rs12551041 | 1.88E-02 | darkmagenta | 0.10619 |
| <i>LRIG3</i>     | NM_153377    | rs2866831  | 4.06E-03 | darkmagenta | 0.55260 |
| <i>LRP1B</i>     | NM_018557    | rs12641953 | 4.40E-05 | darkmagenta | 0.08577 |
| <i>LRP5L</i>     | NM_182492    | rs2339940  | 1.46E-02 | darkmagenta | 0.39417 |
| <i>LRRC8B</i>    | NM_015350    | rs11743030 | 4.05E-06 | darkmagenta | 0.00089 |
| <i>LSAMP</i>     | NM_002338    | rs3829881  | 1.34E-03 | darkmagenta | 0.49992 |
| <i>LSM5</i>      | NM_012322    | rs648166   | 1.71E-03 | darkmagenta | 0.00613 |
| <i>LST1</i>      | NM_205840    | rs942343   | 5.09E-02 | darkmagenta | 0.02145 |
| <i>LYPD1</i>     | NM_001077427 | rs6596148  | 2.00E-02 | darkmagenta | 0.56841 |
| <i>LYST</i>      | NM_000081    | rs838709   | 1.46E-02 | darkmagenta | 0.24018 |
| <i>LYST</i>      | NM_001005736 | NA         | NA       | darkmagenta | 0.28542 |
| <i>MAMDC4</i>    | NM_206920    | rs12527125 | 2.24E-02 | darkmagenta | 0.00894 |
| <i>MAP1B</i>     | NM_005909    | rs7174643  | 9.97E-04 | darkmagenta | 0.23756 |
| <i>MAP1LC3C</i>  | NM_001004343 | rs13419075 | 1.71E-01 | darkmagenta | 0.65610 |
| <i>MAP3K2</i>    | NM_006609    | rs12479003 | 1.55E-02 | darkmagenta | 0.40243 |
| <i>MBNL2</i>     | NM_144778    | rs17685664 | 5.46E-04 | darkmagenta | 0.21944 |
| <i>MDM1</i>      | NM_017440    | rs9541141  | 1.01E-02 | darkmagenta | 0.07668 |
| <i>MFAP2</i>     | NM_017459    | rs2188015  | 2.23E-03 | darkmagenta | 0.71288 |
| <i>MGC15763</i>  | NM_138381    | NA         | NA       | darkmagenta | 0.53013 |
| <i>MGC18216</i>  | XM_927732    | NA         | NA       | darkmagenta | 0.54218 |
| <i>MGC23909</i>  | NM_174909    | NA         | NA       | darkmagenta | 0.04276 |
| <i>MGC34646</i>  | NM_173519    | NA         | NA       | darkmagenta | 0.00152 |
| <i>MINA</i>      | NM_153182    | rs4764971  | 7.35E-04 | darkmagenta | 0.12296 |

Supplementary Table 6

|                |              |            |          |             |         |        |
|----------------|--------------|------------|----------|-------------|---------|--------|
| <i>MIPEP</i>   | NM_005932    | rs10757418 | 9.84E-04 | darkmagenta | 0.64346 |        |
| <i>MLL3</i>    | NM_170606    | rs11687663 | 3.96E-04 | darkmagenta | 0.44458 |        |
| <i>MLL3</i>    | NM_021230    | NA         | NA       | darkmagenta | 0.34590 |        |
| <i>MLSTD1</i>  | NM_018099    | NA         | NA       | darkmagenta | 0.38098 |        |
| <i>MMAB</i>    | NM_052845    | rs1036214  | 1.01E-02 | darkmagenta | 0.37064 |        |
| <i>MMACHC</i>  | NM_015506    | rs2236479  | 5.30E-03 | darkmagenta | 0.73290 |        |
| <i>MMP11</i>   | NM_005940    | rs2827261  | 3.64E-03 | darkmagenta | 0.29493 |        |
| <i>MRC2</i>    | NM_006039    | rs12598492 | 2.35E-03 | darkmagenta | 0.16947 |        |
| <i>MRPL48</i>  | NM_016055    | rs7231241  | 1.88E-03 | darkmagenta | 0.02235 |        |
| <i>MS4A6A</i>  | NM_022349    | rs17097088 | 3.14E-03 | darkmagenta | 0.00017 |        |
| <i>MUSTN1</i>  | NM_205853    | rs4687554  | 2.45E-03 | darkmagenta | 0.01289 |        |
| <i>MYBBP1A</i> | NM_014520    | rs1468064  | 4.35E-03 | darkmagenta | 0.00110 |        |
| <i>MYO5B</i>   | NM_001080467 | rs2965069  | 1.04E-03 | darkmagenta | 0.44262 |        |
| <i>MYO7A</i>   | NM_000260    | rs830786   | 4.12E-03 | darkmagenta | 0.86258 |        |
| <i>MYO9A</i>   | NM_006901    | rs10506635 | 4.04E-03 | darkmagenta | 0.48105 |        |
| <i>MYOM1</i>   | NM_003803    | rs4648468  | 7.27E-04 | darkmagenta | 0.57923 |        |
| <i>NAP1L3</i>  | NM_004538    | NA         | NA       | darkmagenta | 0.01963 |        |
| <i>NAPSA</i>   | NM_004851    | rs6950027  | 2.08E-02 | darkmagenta | 0.00050 |        |
| <i>NAV2</i>    | NM_145117    | rs12590446 | 6.77E-04 | darkmagenta | 0.92821 |        |
| <i>NAV3</i>    | NM_014903    | rs8005999  | 3.69E-04 | darkmagenta | 0.30129 |        |
| <i>NCOR2</i>   | NM_006312    | rs4296799  | 3.73E-03 | darkmagenta | 0.50944 |        |
| <i>NCOR2</i>   | NM_006312    | rs4296799  | 3.73E-03 | darkmagenta | 0.70526 |        |
| <i>NLE1</i>    | NM_018096    | rs4422383  | 2.46E-03 | darkmagenta | 0.02433 |        |
| <i>NOX4</i>    | NM_016931    | rs2202322  | 3.17E-03 | darkmagenta | 0.83677 |        |
| <i>NPHP1</i>   | NM_207181    | rs7398343  | 1.51E-03 | darkmagenta | 0.00805 |        |
| <i>NR4A3</i>   | NM_173199    | rs17542122 | 4.23E-03 | darkmagenta | 0.05125 |        |
| <i>NRG2</i>    | NM_013983    | rs4520207  | 4.82E-03 | darkmagenta | 0.07972 |        |
| <i>NRIP1</i>   | NM_003489    | rs7796519  | 6.85E-05 | darkmagenta | 0.78538 |        |
| <i>NTNG1</i>   | NM_014917    | rs12333431 | 2.57E-03 | darkmagenta | 0.33718 | autism |
| <i>NTRK2</i>   | NM_001007097 | rs8016092  | 4.67E-03 | darkmagenta | 0.65351 |        |
| <i>NTRK2</i>   | NM_001018065 | rs8016092  | 4.67E-03 | darkmagenta | 0.77147 |        |
| <i>NTRK2</i>   | NM_006180    | rs8016092  | 4.67E-03 | darkmagenta | 0.52169 |        |
| <i>OBFC1</i>   | NM_024928    | rs1890227  | 3.09E-03 | darkmagenta | 0.70775 |        |
| <i>OGFOD1</i>  | NM_001031707 | NA         | NA       | darkmagenta | 0.07207 |        |
| <i>ORC5L</i>   | NM_002553    | NA         | NA       | darkmagenta | 0.06960 |        |
| <i>OSBPL3</i>  | NM_145320    | rs2975186  | 1.78E-03 | darkmagenta | 0.29993 |        |
| <i>OVOL1</i>   | NM_004561    | rs7300761  | 9.88E-03 | darkmagenta | 0.00467 |        |
| <i>PCDH21</i>  | NM_033100    | NA         | NA       | darkmagenta | 0.05927 |        |
| <i>PCDHB17</i> | NR_001280    | rs6781671  | 1.71E-02 | darkmagenta | 0.53048 |        |
| <i>PDE8B</i>   | NM_001029851 | rs1176811  | 1.63E-03 | darkmagenta | 0.69131 |        |
| <i>PDLIM7</i>  | NM_005451    | rs10798623 | 9.50E-02 | darkmagenta | 0.02846 |        |
| <i>PDZK3</i>   | NM_178140    | NA         | NA       | darkmagenta | 0.71114 |        |
| <i>PF4V1</i>   | NM_002620    | rs1316453  | 5.65E-02 | darkmagenta | 0.01779 |        |
| <i>PGM2L1</i>  | NM_173582    | rs6566045  | 1.95E-05 | darkmagenta | 0.21545 |        |
| <i>PHF11</i>   | NM_001040443 | rs4609919  | 1.79E-02 | darkmagenta | 0.01718 |        |
| <i>PIGM</i>    | NM_145167    | rs1934080  | 1.49E-02 | darkmagenta | 0.63905 |        |
| <i>PIM1</i>    | NM_002648    | rs9315511  | 1.30E-03 | darkmagenta | 0.54604 |        |
| <i>PKIG</i>    | NM_181805    | rs225436   | 3.99E-03 | darkmagenta | 0.09309 |        |
| <i>PLD1</i>    | NM_002662    | rs6801138  | 2.67E-02 | darkmagenta | 0.01994 |        |

Supplementary Table 6

|                 |              |            |          |             |         |
|-----------------|--------------|------------|----------|-------------|---------|
| <i>PPARG</i>    | NM_138712    | rs11787776 | 4.51E-03 | darkmagenta | 0.63369 |
| <i>PPFIBP2</i>  | NM_003621    | rs12445659 | 1.28E-03 | darkmagenta | 0.40755 |
| <i>PQLC3</i>    | NM_152391    | rs1551191  | 1.09E-02 | darkmagenta | 0.58203 |
| <i>PRICKLE1</i> | NM_153026    | rs7955255  | 1.45E-03 | darkmagenta | 0.56125 |
| <i>PRR5</i>     | NM_001017530 | rs3027409  | 4.76E-03 | darkmagenta | 0.65092 |
| <i>PRR5</i>     | NM_001017530 | rs3027409  | 4.76E-03 | darkmagenta | 0.81543 |
| <i>PYCR1</i>    | NM_153824    | rs6767250  | 1.53E-02 | darkmagenta | 0.03196 |
| <i>QSCN6</i>    | NM_002826    | NA         | NA       | darkmagenta | 0.34927 |
| <i>RAB13</i>    | NM_002870    | rs12558512 | 8.69E-02 | darkmagenta | 0.26623 |
| <i>RAB40B</i>   | NM_006822    | rs11635107 | 2.77E-02 | darkmagenta | 0.45289 |
| <i>RAI14</i>    | NM_015577    | rs2243982  | 6.67E-04 | darkmagenta | 0.88954 |
| <i>RAP1GDS1</i> | NM_021159    | rs17418706 | 1.67E-04 | darkmagenta | 0.22710 |
| <i>RARA</i>     | NM_001024809 | rs972894   | 9.62E-03 | darkmagenta | 0.21047 |
| <i>RBMS1</i>    | NM_002897    | rs9295131  | 3.12E-02 | darkmagenta | 0.86761 |
| <i>RGPD1</i>    | NM_001024457 | NA         | NA       | darkmagenta | 0.03723 |
| <i>RGS10</i>    | NM_001005339 | rs7705728  | 1.26E-02 | darkmagenta | 0.02856 |
| <i>RGS10</i>    | NM_002925    | rs7705728  | 1.26E-02 | darkmagenta | 0.15271 |
| <i>RGS5</i>     | NM_003617    | rs6678820  | 2.27E-02 | darkmagenta | 0.06886 |
| <i>RHOB</i>     | NM_004040    | rs2223225  | 9.44E-03 | darkmagenta | 0.46976 |
| <i>RHOBTB3</i>  | NM_014899    | rs4379388  | 1.23E-03 | darkmagenta | 0.77925 |
| <i>RICS</i>     | NM_014715    | NA         | NA       | darkmagenta | 0.67159 |
| <i>ROBO4</i>    | NM_019055    | rs707496   | 6.52E-02 | darkmagenta | 0.00478 |
| <i>ROR2</i>     | NM_004560    | rs16949539 | 1.07E-02 | darkmagenta | 0.59628 |
| <i>RPL39L</i>   | NM_052969    | rs17375108 | 3.11E-02 | darkmagenta | 0.60781 |
| <i>RPUSD3</i>   | NM_173659    | rs13421149 | 1.58E-03 | darkmagenta | 0.77370 |
| <i>RTN4IP1</i>  | NM_032730    | rs502398   | 6.69E-05 | darkmagenta | 0.75202 |
| <i>RTN4R</i>    | NM_023004    | rs1475893  | 1.45E-02 | darkmagenta | 0.09361 |
| <i>S100PBP</i>  | NM_001017406 | rs7014840  | 7.85E-04 | darkmagenta | 0.02563 |
| <i>SAA1</i>     | NM_199161    | rs17669793 | 2.62E-02 | darkmagenta | 0.08857 |
| <i>SAMD13</i>   | NM_001010971 | rs13333054 | 1.47E-02 | darkmagenta | 0.16756 |
| <i>SAT</i>      | NM_002970    | NA         | NA       | darkmagenta | 0.69166 |
| <i>SCD5</i>     | NM_001037582 | rs11139500 | 1.35E-03 | darkmagenta | 0.94417 |
| <i>SERINC5</i>  | NM_178276    | rs13123934 | 8.45E-03 | darkmagenta | 0.01438 |
| <i>SERPINE2</i> | NM_006216    | rs6738983  | 6.43E-03 | darkmagenta | 0.78948 |
| <i>SHF</i>      | NM_138356    | rs8140396  | 3.46E-03 | darkmagenta | 0.18722 |
| <i>SLBP</i>     | NM_006527    | rs9917191  | 8.34E-03 | darkmagenta | 0.01315 |
| <i>SLC32A1</i>  | NM_080552    | rs10197807 | 4.20E-03 | darkmagenta | 0.98131 |
| <i>SLC44A1</i>  | NM_080546    | rs502398   | 6.69E-05 | darkmagenta | 0.59956 |
| <i>SLIT2</i>    | NM_004787    | rs675465   | 4.63E-04 | darkmagenta | 0.37997 |
| <i>SMARCD3</i>  | NM_001003801 | rs6464134  | 4.19E-02 | darkmagenta | 0.09691 |
| <i>SMOC1</i>    | NM_001034852 | rs17175095 | 3.33E-03 | darkmagenta | 0.65034 |
| <i>SMOC1</i>    | NM_022137    | rs17175095 | 3.33E-03 | darkmagenta | 0.44271 |
| <i>SNAP23</i>   | NM_003825    | rs4711637  | 4.73E-03 | darkmagenta | 0.39467 |
| <i>SNCB</i>     | XM_936492    | NA         | NA       | darkmagenta | 0.15937 |
| <i>SNX25</i>    | NM_031953    | rs9852812  | 1.77E-03 | darkmagenta | 0.44639 |
| <i>SNX7</i>     | NM_152238    | rs1921023  | 4.97E-03 | darkmagenta | 0.01351 |
| <i>SOD2</i>     | NM_000636    | rs2758331  | 3.13E-02 | darkmagenta | 0.01528 |
| <i>SPIN-2</i>   | NM_001006681 | NA         | NA       | darkmagenta | 0.00083 |
| <i>SPON2</i>    | NM_012445    | rs7208333  | 5.04E-04 | darkmagenta | 0.04835 |

Supplementary Table 6

|                  |              |            |          |             |         |          |
|------------------|--------------|------------|----------|-------------|---------|----------|
| <i>SVEP1</i>     | NM_153366    | rs4839202  | 7.48E-04 | darkmagenta | 0.08954 |          |
| <i>SYPL1</i>     | NM_006754    | rs16968126 | 1.45E-02 | darkmagenta | 0.03690 |          |
| <i>SYT14</i>     | NM_153262    | rs4537554  | 2.31E-02 | darkmagenta | 0.64320 |          |
| <i>SYT7</i>      | NM_004200    | rs6011530  | 1.02E-03 | darkmagenta | 0.59462 |          |
| <i>TAC3</i>      | NM_013251    | rs3795101  | 1.73E-03 | darkmagenta | 0.84001 |          |
| <i>TGFB3</i>     | NM_003239    | rs2669010  | 8.50E-03 | darkmagenta | 0.75250 |          |
| <i>THNSL1</i>    | NM_024838    | rs1544369  | 5.45E-03 | darkmagenta | 0.49728 |          |
| <i>THSD1P</i>    | XR_000915    | NA         | NA       | darkmagenta | 0.01740 |          |
| <i>THY1</i>      | NM_006288    | rs2635309  | 9.67E-03 | darkmagenta | 0.64963 |          |
| <i>TIMP3</i>     | NM_000362    | rs2253204  | 1.34E-02 | darkmagenta | 0.55236 |          |
| <i>TMEM121</i>   | NM_025268    | rs6845362  | 4.16E-02 | darkmagenta | 0.09224 |          |
| <i>TMEM151</i>   | NM_153266    | NA         | NA       | darkmagenta | 0.00354 |          |
| <i>TMSB4X</i>    | NM_021109    | NA         | NA       | darkmagenta | 0.00191 |          |
| <i>TSC22D4</i>   | NM_030935    | rs11613360 | 3.74E-03 | darkmagenta | 0.82162 |          |
| <i>TSPYL2</i>    | NM_022117    | NA         | NA       | darkmagenta | 0.74060 |          |
| <i>TSPYL2</i>    | NM_022117    | NA         | NA       | darkmagenta | 0.22460 |          |
| <i>TUBA1</i>     | NM_006000    | NA         | NA       | darkmagenta | 0.08758 |          |
| <i>UNC5A</i>     | NM_133369    | rs6786297  | 2.69E-03 | darkmagenta | 0.12521 |          |
| <i>USP2</i>      | NM_171997    | rs576945   | 8.64E-03 | darkmagenta | 0.00023 |          |
| <i>WDR51B</i>    | NM_172240    | NA         | NA       | darkmagenta | 0.29507 |          |
| <i>WFDC1</i>     | NM_021197    | rs972827   | 1.26E-03 | darkmagenta | 0.82880 |          |
| <i>WNT10B</i>    | NM_003394    | rs7555040  | 1.25E-02 | darkmagenta | 0.07298 |          |
| <i>WNT5B</i>     | NM_032642    | rs4876121  | 1.76E-02 | darkmagenta | 0.35089 |          |
| <i>ZBTB12</i>    | NM_181842    | rs7702447  | 1.18E-02 | darkmagenta | 0.02945 |          |
| <i>ZBTB20</i>    | NM_015642    | rs2254527  | 4.43E-04 | darkmagenta | 0.66227 |          |
| <i>ZDHHC12</i>   | NM_032799    | rs870815   | 1.05E-01 | darkmagenta | 0.70371 |          |
| <i>ZDHHC23</i>   | NM_173570    | rs2798657  | 4.44E-02 | darkmagenta | 0.59656 |          |
| <i>ZNF420</i>    | NM_144689    | rs441328   | 1.04E-02 | darkmagenta | 0.00408 |          |
| <i>ZNF490</i>    | NM_020714    | rs1111059  | 2.46E-04 | darkmagenta | 0.00108 |          |
| <i>ZNF539</i>    | NM_203282    | rs2339940  | 1.46E-02 | darkmagenta | 0.00078 |          |
| <i>AP4S1</i>     | NM_007077    | rs586594   | 1.15E-03 | gold4       | 0.51461 |          |
| <i>C21orf67</i>  | NM_058188    | NA         | NA       | gold4       | 0.96058 |          |
| <i>CACNA2D2</i>  | NM_001005505 | rs913465   | 3.20E-03 | gold4       | 0.33823 | epilepsy |
| <i>COL25A1</i>   | NM_032518    | rs3098728  | 1.00E-03 | gold4       | 0.13549 |          |
| <i>DNMT3A</i>    | NM_022552    | rs10517083 | 4.99E-03 | gold4       | 0.01001 |          |
| <i>EED</i>       | NM_152991    | rs6849318  | 4.96E-03 | gold4       | 0.25342 |          |
| <i>FLJ32926</i>  | NM_144577    | NA         | NA       | gold4       | 0.22396 |          |
| <i>HIST1H3G</i>  | NM_003534    | rs11160030 | 2.17E-02 | gold4       | 0.22859 |          |
| <i>IL28A</i>     | NM_172138    | rs9855433  | 1.33E-02 | gold4       | 0.45135 |          |
| <i>LOC387778</i> | NM_001008778 | NA         | NA       | gold4       | 0.39262 |          |
| <i>LOC654151</i> | XM_940045    | NA         | NA       | gold4       | 0.69858 |          |
| <i>MSRB3</i>     | NM_001031679 | rs696014   | 5.31E-03 | gold4       | 0.24280 |          |
| <i>OAZ3</i>      | NM_016178    | rs1634079  | 1.82E-02 | gold4       | 0.33647 |          |
| <i>OR52R1</i>    | NM_001005177 | rs1558250  | 5.83E-03 | gold4       | 0.28536 |          |
| <i>OR6Q1</i>     | NM_001005186 | rs2866831  | 4.06E-03 | gold4       | 0.52207 |          |
| <i>PILRB</i>     | NM_013440    | NA         | NA       | gold4       | 0.38297 |          |
| <i>PNPLA1</i>    | NM_001039725 | NA         | NA       | gold4       | 0.23066 |          |
| <i>RBPSUHL</i>   | NM_014276    | NA         | NA       | gold4       | 1.00000 |          |
| <i>SELM</i>      | NM_080430    | rs9258303  | 1.40E-02 | gold4       | 0.36974 |          |

Supplementary Table 6

|                 |                 |            |          |       |         |        |
|-----------------|-----------------|------------|----------|-------|---------|--------|
| <i>SLC44A4</i>  | NM_032794       | NA         | NA       | gold4 | 0.01123 |        |
| <i>STARD8</i>   | NM_014725       | NA         | NA       | gold4 | 0.57744 |        |
| <i>SYNGAP1</i>  | NM_006772       | rs6462481  | 2.99E-03 | gold4 | 0.24573 |        |
| <i>TMPRSS4</i>  | NM_019894       | rs1289666  | 1.07E-02 | gold4 | 0.54204 |        |
| <i>ZNF396</i>   | NM_145756       | rs3130559  | 9.51E-03 | gold4 | 0.35648 |        |
|                 | 5-Mar NM_020814 | NA         | NA       | green | 0.22855 |        |
| <i>ABCB1</i>    | NM_000927       | rs3784759  | 6.80E-03 | green | 0.26588 |        |
| <i>ABCB4</i>    | NM_000443       | rs4072556  | 1.95E-02 | green | 0.28449 |        |
| <i>ABCC6</i>    | NM_001171       | rs344734   | 5.69E-03 | green | 0.00802 |        |
| <i>ACOT4</i>    | NM_152331       | rs7215957  | 2.79E-03 | green | 0.05217 |        |
| <i>ACSL3</i>    | NM_004457       | rs6717500  | 7.24E-03 | green | 0.68360 |        |
| <i>ACTC</i>     | NM_005159       | NA         | NA       | green | 0.50960 |        |
| <i>ADAMTS8</i>  | NM_007037       | rs2713589  | 1.45E-02 | green | 0.17953 |        |
| <i>ADCY6</i>    | NM_015270       | rs6458566  | 4.20E-03 | green | 0.14649 |        |
| <i>ADRB2</i>    | NM_000024       | rs2082382  | 1.21E-02 | green | 0.13322 | autism |
| <i>AKAP11</i>   | NM_144490       | NA         | NA       | green | 0.23158 |        |
| <i>AKAP12</i>   | NM_144497       | rs7781309  | 1.39E-02 | green | 0.17456 |        |
| <i>AKAP7</i>    | NM_004842       | rs4751145  | 6.29E-03 | green | 0.62851 |        |
| <i>AKAP7</i>    | NM_016377       | rs4751145  | 6.29E-03 | green | 0.70159 |        |
| <i>ALOX5</i>    | NM_000698       | rs12712937 | 3.03E-03 | green | 0.24830 |        |
| <i>ANKRD1</i>   | NM_014391       | rs1755991  | 1.79E-03 | green | 0.12873 |        |
| <i>ANKRD36</i>  | NM_198555       | NA         | NA       | green | 0.04947 |        |
| <i>ARC</i>      | NM_015193       | rs10097505 | 1.05E-01 | green | 0.55876 |        |
| <i>ARHGDI6</i>  | NM_001176       | rs10967209 | 1.34E-02 | green | 0.32268 |        |
| <i>ARL13B</i>   | NM_182896       | rs10882254 | 4.95E-03 | green | 0.13428 |        |
| <i>ARL5B</i>    | NM_178815       | rs10511668 | 7.72E-03 | green | 0.15025 |        |
| <i>ATF3</i>     | NM_001040619    | rs6682064  | 1.05E-01 | green | 0.88704 |        |
| <i>ATF4</i>     | NM_001675       | rs1565866  | 9.24E-03 | green | 0.03487 |        |
| <i>ATOH8</i>    | NM_032827       | rs1014915  | 4.67E-03 | green | 0.46287 |        |
| <i>ATP8B2</i>   | NM_020452       | rs2296254  | 2.04E-02 | green | 0.29661 |        |
| <i>ATR</i>      | NM_001184       | rs17409    | 3.18E-03 | green | 0.12076 |        |
| <i>ATXN2L</i>   | NM_017492       | NA         | NA       | green | 0.01578 |        |
| <i>BACH2</i>    | NM_021813       | rs17731311 | 1.02E-03 | green | 0.54910 |        |
| <i>BAI1</i>     | XM_940726       | NA         | NA       | green | 0.03219 |        |
| <i>BAIAP2</i>   | NM_006340       | rs720863   | 1.90E-02 | green | 0.79238 |        |
| <i>BAIAP2</i>   | NM_006340       | rs720863   | 1.90E-02 | green | 0.69023 |        |
| <i>BAIAP2</i>   | NM_017450       | rs720863   | 1.90E-02 | green | 0.86269 |        |
| <i>BCL9</i>     | NM_004326       | rs979000   | 2.36E-02 | green | 0.89882 |        |
| <i>BCL9L</i>    | NM_182557       | rs2649098  | 1.27E-02 | green | 0.03790 |        |
| <i>BHLHB2</i>   | NM_003670       | NA         | NA       | green | 0.22412 |        |
| <i>BIRC3</i>    | NM_001165       | rs12476979 | 1.71E-02 | green | 0.12923 |        |
| <i>BMP2K</i>    | NM_017593       | rs1870923  | 3.76E-03 | green | 0.29954 |        |
| <i>BNC1</i>     | NM_001717       | rs224955   | 5.74E-03 | green | 0.08088 |        |
| <i>BOLA1</i>    | NM_016074       | rs30330    | 8.82E-03 | green | 0.09181 |        |
| <i>C10orf54</i> | NM_022153       | rs7231241  | 1.88E-03 | green | 0.47153 |        |
| <i>C10orf6</i>  | NM_018121       | NA         | NA       | green | 0.88286 |        |
| <i>C10orf63</i> | NM_145010       | NA         | NA       | green | 0.03494 |        |
| <i>C10orf77</i> | NM_024789       | NA         | NA       | green | 0.17396 |        |
| <i>C12orf60</i> | NM_175874       | rs7304054  | 2.77E-03 | green | 0.10006 |        |

Supplementary Table 6

|                  |              |            |          |       |         |        |
|------------------|--------------|------------|----------|-------|---------|--------|
| <i>C14orf140</i> | NM_001042430 | NA         | NA       | green | 0.40767 |        |
| <i>C14orf43</i>  | NM_194278    | rs11220    | 7.35E-03 | green | 0.58716 |        |
| <i>C15orf39</i>  | NM_015492    | rs11000020 | 2.29E-02 | green | 0.04746 |        |
| <i>C15orf41</i>  | NM_032499    | rs2243982  | 6.67E-04 | green | 0.33186 |        |
| <i>C17orf76</i>  | NM_207387    | rs3768293  | 6.71E-03 | green | 0.20377 |        |
| <i>C1orf51</i>   | NM_144697    | rs12013571 | 2.00E-02 | green | 0.27824 |        |
| <i>C1orf83</i>   | NM_153035    | rs12504598 | 4.19E-03 | green | 0.45374 |        |
| <i>C1QL2</i>     | NM_182528    | rs7854254  | 6.06E-02 | green | 0.10156 |        |
| <i>C1QTNF6</i>   | NM_182486    | rs229566   | 6.84E-03 | green | 0.17123 |        |
| <i>C3orf18</i>   | NM_016210    | rs10141612 | 3.35E-03 | green | 0.17141 |        |
| <i>C6orf128</i>  | NM_145316    | NA         | NA       | green | 0.38947 |        |
| <i>C6orf145</i>  | NM_183373    | rs13395090 | 4.13E-03 | green | 0.48243 |        |
| <i>C6orf15</i>   | NM_014070    | rs3130559  | 9.51E-03 | green | 0.21560 |        |
| <i>C6orf57</i>   | NM_145267    | rs10879474 | 1.37E-02 | green | 0.14115 |        |
| <i>C6orf59</i>   | NM_024929    | NA         | NA       | green | 0.24126 |        |
| <i>C9orf132</i>  | NM_203305    | rs17344939 | 1.96E-02 | green | 0.60481 |        |
| <i>C9orf3</i>    | NM_032823    | rs17685664 | 5.46E-04 | green | 0.42653 |        |
| <i>CACNA1H</i>   | NM_021098    | rs7208333  | 5.04E-04 | green | 0.35142 |        |
| <i>CALCRL</i>    | NM_005795    | rs172818   | 1.03E-03 | green | 0.14429 |        |
| <i>CBFB</i>      | NM_001755    | rs11131036 | 7.78E-04 | green | 0.75452 |        |
| <i>CCL26</i>     | NM_006072    | rs6904232  | 1.66E-02 | green | 0.31113 |        |
| <i>CCNA1</i>     | NM_003914    | rs6476493  | 4.71E-02 | green | 0.60598 |        |
| <i>CDC42EP1</i>  | NM_007061    | NA         | NA       | green | 0.45645 |        |
| <i>CDC42EP1</i>  | NM_007061    | NA         | NA       | green | 0.13264 |        |
| <i>CDYL</i>      | NM_004824    | rs4496983  | 1.66E-03 | green | 0.33979 |        |
| <i>CEBPA</i>     | NM_004364    | rs4407366  | 5.15E-03 | green | 0.04882 |        |
| <i>CEBPB</i>     | NM_005194    | rs4774557  | 1.66E-03 | green | 0.63133 |        |
| <i>CFH</i>       | NM_000186    | rs7524776  | 3.09E-02 | green | 0.01466 |        |
| <i>CGN</i>       | NM_020770    | rs11797944 | 7.37E-03 | green | 0.90682 |        |
| <i>CGNL1</i>     | NM_032866    | rs160078   | 1.63E-03 | green | 0.67978 |        |
| <i>ChGn</i>      | NM_018371    | NA         | NA       | green | 0.01409 |        |
| <i>CHRNA3</i>    | NM_000743    | rs12914385 | 1.94E-02 | green | 0.12096 |        |
| <i>CHST3</i>     | NM_004273    | rs7965596  | 2.82E-03 | green | 0.87313 |        |
| <i>CHST6</i>     | NM_021615    | rs555779   | 3.13E-03 | green | 0.44322 |        |
| <i>CLCF1</i>     | NM_013246    | rs8064579  | 6.41E-03 | green | 0.88265 |        |
| <i>CLDN1</i>     | NM_021101    | rs12987796 | 1.10E-01 | green | 0.59678 |        |
| <i>CLIC6</i>     | NM_053277    | rs6457797  | 1.34E-02 | green | 0.07530 |        |
| <i>CNR1</i>      | NM_016083    | rs277742   | 4.38E-03 | green | 0.47719 | autism |
| <i>CNTN1</i>     | NM_001843    | rs9369119  | 6.13E-04 | green | 0.06153 |        |
| <i>COL13A1</i>   | NM_080805    | rs1351419  | 4.06E-04 | green | 0.03381 |        |
| <i>COL2A1</i>    | NM_001844    | rs2416025  | 7.55E-04 | green | 0.37018 |        |
| <i>COL5A1</i>    | NM_000093    | rs10496744 | 3.40E-03 | green | 0.33312 |        |
| <i>COL7A1</i>    | NM_000094    | rs2255532  | 1.51E-03 | green | 0.09132 |        |
| <i>CPEB1</i>     | NM_001079534 | rs11163106 | 3.86E-03 | green | 0.62430 |        |
| <i>CPEB1</i>     | NM_030594    | rs11163106 | 3.86E-03 | green | 0.80735 |        |
| <i>CPNE4</i>     | NM_130808    | rs9321351  | 8.08E-05 | green | 0.39427 |        |
| <i>CPZ</i>       | NM_001014447 | rs3794318  | 4.29E-03 | green | 0.05813 |        |
| <i>CTGF</i>      | NM_001901    | rs1605327  | 2.31E-02 | green | 0.63824 |        |
| <i>CXorf12</i>   | NM_003492    | NA         | NA       | green | 0.40851 |        |

Supplementary Table 6

|                 |              |            |          |       |         |        |
|-----------------|--------------|------------|----------|-------|---------|--------|
| <i>DDN</i>      | NM_015086    | rs10165893 | 7.51E-04 | green | 0.09459 |        |
| <i>DIO2</i>     | NM_001007023 | rs2373478  | 1.24E-03 | green | 0.25513 |        |
| <i>DKK1</i>     | NM_012242    | rs13235506 | 4.95E-03 | green | 0.00402 |        |
| <i>DNAJC12</i>  | NM_021800    | rs11661396 | 6.00E-03 | green | 0.86594 |        |
| <i>DNAJC12</i>  | NM_201262    | rs11661396 | 6.00E-03 | green | 0.78247 |        |
| <i>DNMBP</i>    | NM_015221    | rs6539053  | 1.50E-03 | green | 0.11248 |        |
| <i>DOK4</i>     | NM_018110    | rs10888939 | 3.92E-03 | green | 0.20279 |        |
| <i>DSCR1</i>    | NM_004414    | NA         | NA       | green | 0.29775 |        |
| <i>DUSP14</i>   | NM_007026    | rs1609948  | 3.71E-03 | green | 0.85518 |        |
| <i>DUSP4</i>    | NM_057158    | rs6518702  | 3.87E-02 | green | 0.42213 |        |
| <i>DYNLRB2</i>  | NM_130897    | rs12343395 | 6.38E-03 | green | 0.04552 |        |
| <i>EDN1</i>     | NM_001955    | rs4702867  | 6.85E-03 | green | 0.40089 |        |
| <i>EFEMP1</i>   | NM_001039348 | rs6766861  | 8.05E-03 | green | 0.47166 |        |
| <i>EFEMP1</i>   | NM_004105    | rs6766861  | 8.05E-03 | green | 0.40136 |        |
| <i>EFNA1</i>    | NM_004428    | rs9324761  | 1.35E-03 | green | 0.66194 |        |
| <i>EFNA1</i>    | NM_004428    | rs9324761  | 1.35E-03 | green | 0.60803 |        |
| <i>EGFL9</i>    | NM_023932    | NA         | NA       | green | 0.43149 |        |
| <i>EGR1</i>     | NM_001964    | rs1901803  | 2.45E-02 | green | 0.79110 |        |
| <i>EGR2</i>     | NM_000399    | rs4968938  | 4.61E-02 | green | 0.86433 | autism |
| <i>EIF2C2</i>   | NM_012154    | rs11739594 | 7.96E-03 | green | 0.57302 |        |
| <i>EIF5</i>     | NM_183004    | rs4135064  | 2.67E-03 | green | 0.09216 |        |
| <i>ELF1</i>     | NM_172373    | rs6072705  | 3.47E-03 | green | 0.41747 |        |
| <i>ELF4</i>     | NM_001421    | NA         | NA       | green | 0.09482 |        |
| <i>ELMO3</i>    | NM_024712    | rs10498525 | 1.72E-02 | green | 0.18978 |        |
| <i>ERN1</i>     | NM_152461    | NA         | NA       | green | 0.59958 |        |
| <i>ETV1</i>     | NM_004956    | rs11023030 | 1.12E-03 | green | 0.28793 |        |
| <i>EXOC6</i>    | NM_001013848 | rs4538949  | 3.16E-03 | green | 0.61602 |        |
| <i>FAM102A</i>  | NM_001035254 | rs2713589  | 1.45E-02 | green | 0.18613 |        |
| <i>FAM13C1</i>  | NM_198215    | NA         | NA       | green | 0.43847 |        |
| <i>FAM46B</i>   | NM_052943    | rs16967029 | 4.27E-03 | green | 0.56841 |        |
| <i>FBLN1</i>    | NM_001996    | rs1984192  | 5.50E-04 | green | 0.36016 |        |
| <i>FBLN1</i>    | NM_001996    | rs1984192  | 5.50E-04 | green | 0.34679 |        |
| <i>FBLN1</i>    | NM_006486    | rs1984192  | 5.50E-04 | green | 0.39352 |        |
| <i>FCHO2</i>    | NM_138782    | rs9310236  | 5.49E-04 | green | 0.03071 |        |
| <i>FCN3</i>     | NM_173452    | rs929620   | 1.23E-02 | green | 0.23008 |        |
| <i>FGF19</i>    | NM_005117    | rs3853158  | 8.30E-03 | green | 0.41423 |        |
| <i>FLJ10213</i> | NM_018029    | NA         | NA       | green | 0.19885 |        |
| <i>FLJ10324</i> | NM_018059    | NA         | NA       | green | 0.07849 |        |
| <i>FLJ20273</i> | NM_019027    | NA         | NA       | green | 0.17554 |        |
| <i>FLJ20366</i> | NM_017786    | NA         | NA       | green | 0.88912 |        |
| <i>FLJ37266</i> | NM_175892    | NA         | NA       | green | 0.46920 |        |
| <i>FOSB</i>     | NM_006732    | rs6097043  | 9.55E-04 | green | 0.49334 |        |
| <i>FOXC1</i>    | NM_001453    | rs2745580  | 1.20E-02 | green | 0.55541 |        |
| <i>FOXD2</i>    | NM_004474    | rs1959775  | 4.90E-02 | green | 0.22370 |        |
| <i>FOXP4</i>    | NM_001012427 | rs16871561 | 1.30E-03 | green | 0.20781 |        |
| <i>FRAT2</i>    | NM_012083    | rs4735521  | 1.75E-02 | green | 0.63618 |        |
| <i>FRZB</i>     | NM_001463    | rs6698109  | 3.61E-02 | green | 0.15955 |        |
| <i>FSTL3</i>    | NM_005860    | rs13381806 | 8.14E-03 | green | 0.26730 |        |
| <i>FXYS5</i>    | NM_014164    | rs1325545  | 4.05E-03 | green | 0.18328 |        |

Supplementary Table 6

|                  |              |            |          |       |         |
|------------------|--------------|------------|----------|-------|---------|
| <i>FXVD5</i>     | NM_014164    | rs1325545  | 4.05E-03 | green | 0.36316 |
| <i>FXVD7</i>     | NM_022006    | rs1325545  | 4.05E-03 | green | 0.40822 |
| <i>GALIG</i>     | NM_194327    | NA         | NA       | green | 0.10908 |
| <i>GARNL4</i>    | NM_015085    | NA         | NA       | green | 0.66821 |
| <i>GBP2</i>      | NM_004120    | rs6551408  | 8.14E-03 | green | 0.24764 |
| <i>GCH1</i>      | NM_001024024 | rs17117895 | 8.40E-04 | green | 0.30878 |
| <i>GCH1</i>      | NM_001024070 | rs17117895 | 8.40E-04 | green | 0.45946 |
| <i>GDF15</i>     | NM_004864    | rs7788359  | 5.73E-03 | green | 0.94008 |
| <i>GEFT</i>      | NM_182947    | NA         | NA       | green | 0.07993 |
| <i>GFOD1</i>     | NM_018988    | rs17219978 | 2.12E-03 | green | 0.40508 |
| <i>GFPT2</i>     | NM_005110    | rs2044479  | 7.49E-04 | green | 0.68323 |
| <i>GFRA1</i>     | NM_005264    | rs6661142  | 5.24E-03 | green | 0.41687 |
| <i>GFRA1</i>     | NM_005264    | rs6661142  | 5.24E-03 | green | 0.34892 |
| <i>GGA1</i>      | NM_001001560 | rs848092   | 5.59E-03 | green | 0.09053 |
| <i>GGTL3</i>     | NM_178025    | NA         | NA       | green | 0.07047 |
| <i>GJB2</i>      | NM_004004    | rs4441876  | 1.40E-03 | green | 0.27823 |
| <i>GLCE</i>      | NM_015554    | rs4542295  | 5.39E-03 | green | 0.38283 |
| <i>GLI4</i>      | NM_138465    | rs1967017  | 5.42E-03 | green | 0.16541 |
| <i>GNB3</i>      | NM_002075    | rs905965   | 5.90E-03 | green | 0.16347 |
| <i>GOLPH3L</i>   | NM_018178    | rs10484601 | 1.76E-02 | green | 0.52417 |
| <i>GPM6A</i>     | NM_201591    | rs1495716  | 1.61E-02 | green | 0.30692 |
| <i>GPR150</i>    | NM_199243    | rs17717907 | 2.80E-03 | green | 0.01180 |
| <i>GPX6</i>      | NM_182701    | rs9314935  | 8.92E-03 | green | 0.01477 |
| <i>H19</i>       | NR_002196    | rs901494   | 1.68E-02 | green | 0.40364 |
| <i>HAGHL</i>     | NM_207112    | rs12185252 | 2.50E-03 | green | 0.11625 |
| <i>HBEGF</i>     | NM_001945    | rs12703771 | 1.45E-02 | green | 0.63873 |
| <i>HDHD3</i>     | NM_031219    | rs12408865 | 2.31E-02 | green | 0.38013 |
| <i>HES2</i>      | NM_019089    | rs9931078  | 4.00E-03 | green | 0.01525 |
| <i>HES4</i>      | NM_021170    | rs2784956  | 3.74E-02 | green | 0.56625 |
| <i>HEXIM2</i>    | NM_144608    | rs4806155  | 1.77E-02 | green | 0.26485 |
| <i>HIC1</i>      | NM_006497    | rs7783715  | 1.55E-02 | green | 0.30751 |
| <i>HIG2</i>      | NM_013332    | NA         | NA       | green | 0.23513 |
| <i>HIST1H1C</i>  | NM_005319    | rs2094500  | 3.33E-02 | green | 0.16903 |
| <i>HIST1H2BH</i> | NM_003524    | rs2830038  | 6.21E-05 | green | 0.14222 |
| <i>HIVEP1</i>    | NM_002114    | rs17422381 | 5.07E-03 | green | 0.38260 |
| <i>HNMT</i>      | NM_006895    | rs3817939  | 1.87E-02 | green | 0.37020 |
| <i>HOXB2</i>     | NM_002145    | rs7932879  | 3.90E-02 | green | 0.40732 |
| <i>HRH1</i>      | NM_000861    | rs596406   | 3.55E-03 | green | 0.14083 |
| <i>HS3ST1</i>    | NM_005114    | rs7194545  | 5.96E-03 | green | 0.08877 |
| <i>HS3ST3A1</i>  | NM_006042    | rs3785697  | 3.02E-04 | green | 0.46357 |
| <i>HS3ST4</i>    | NM_006040    | rs4307059  | 1.07E-05 | green | 0.21265 |
| <i>HTR1F</i>     | NM_000866    | rs1493007  | 1.13E-02 | green | 0.40598 |
| <i>IER5L</i>     | NM_203434    | rs4863907  | 2.93E-02 | green | 0.88294 |
| <i>IFIT3</i>     | NM_001549    | rs11203078 | 1.70E-02 | green | 0.74945 |
| <i>IFIT3</i>     | NM_001549    | rs11203078 | 1.70E-02 | green | 0.71051 |
| <i>IFT74</i>     | NM_025103    | rs11015249 | 4.52E-03 | green | 0.30960 |
| <i>IL13RA2</i>   | NM_000640    | NA         | NA       | green | 0.35024 |
| <i>IL6R</i>      | NM_181359    | rs9371587  | 3.71E-03 | green | 0.13054 |
| <i>ITGA2</i>     | NM_002203    | rs8030739  | 2.47E-03 | green | 0.08904 |



Supplementary Table 6

|                  |              |            |          |       |         |
|------------------|--------------|------------|----------|-------|---------|
| <i>JAZF1</i>     | NM_175061    | rs2614048  | 1.98E-03 | green | 0.09944 |
| <i>JOSD3</i>     | NM_024116    | NA         | NA       | green | 0.32030 |
| <i>JUNB</i>      | NM_002229    | rs1326800  | 7.69E-03 | green | 0.53934 |
| <i>KCNK12</i>    | NM_022055    | rs698334   | 1.06E-03 | green | 0.62610 |
| <i>KHK</i>       | NM_000221    | rs9579104  | 9.66E-03 | green | 0.02330 |
| <i>KIAA1026</i>  | NM_001018000 | NA         | NA       | green | 0.77940 |
| <i>KIAA1727</i>  | NM_033393    | NA         | NA       | green | 0.81060 |
| <i>KIAA1913</i>  | NM_052913    | NA         | NA       | green | 0.09854 |
| <i>KISS1R</i>    | NM_032551    | rs17702759 | 1.23E-02 | green | 0.01482 |
| <i>KLF10</i>     | NM_005655    | rs513091   | 8.34E-04 | green | 0.17251 |
| <i>KLF10</i>     | NM_005655    | rs513091   | 8.34E-04 | green | 0.32568 |
| <i>KLF15</i>     | NM_014079    | rs7933438  | 2.91E-02 | green | 0.37335 |
| <i>KLF2</i>      | NM_016270    | rs10280613 | 2.36E-02 | green | 0.58640 |
| <i>KRT13</i>     | NM_002274    | rs13288123 | 1.27E-03 | green | 0.05595 |
| <i>KRT19</i>     | NM_002276    | rs13288123 | 1.27E-03 | green | 0.61521 |
| <i>LARP2</i>     | NM_018078    | NA         | NA       | green | 0.25440 |
| <i>LARP2</i>     | NM_032239    | NA         | NA       | green | 0.51513 |
| <i>LAT2</i>      | NM_032464    | rs11220    | 7.35E-03 | green | 0.18579 |
| <i>LATS2</i>     | NM_014572    | rs6426629  | 2.74E-03 | green | 0.10639 |
| <i>LBH</i>       | NM_030915    | rs2313742  | 2.10E-04 | green | 0.33530 |
| <i>LBR</i>       | NM_002296    | rs3766928  | 6.33E-02 | green | 0.76008 |
| <i>LBR</i>       | NM_002296    | rs3766928  | 6.33E-02 | green | 0.49647 |
| <i>LIAS</i>      | NM_006859    | rs2638863  | 5.33E-03 | green | 0.28506 |
| <i>LIF</i>       | NM_002309    | rs9579383  | 2.13E-02 | green | 0.93227 |
| <i>LIMA1</i>     | NM_016357    | rs8092993  | 5.16E-03 | green | 0.84477 |
| <i>LIMD1</i>     | NM_014240    | rs10493120 | 4.23E-03 | green | 0.02008 |
| <i>LOC152485</i> | NM_178835    | NA         | NA       | green | 0.76679 |
| <i>LOC285527</i> | XM_945291    | NA         | NA       | green | 0.20812 |
| <i>LOC285989</i> | NM_213603    | NA         | NA       | green | 0.26602 |
| <i>LOC388284</i> | NM_001012984 | NA         | NA       | green | 0.36219 |
| <i>LOC400120</i> | NM_203451    | NA         | NA       | green | 0.65738 |
| <i>LOC442578</i> | NM_001013739 | NA         | NA       | green | 0.24252 |
| <i>LOC493869</i> | NM_001008397 | NA         | NA       | green | 0.30527 |
| <i>LOC51136</i>  | NM_016125    | NA         | NA       | green | 0.50047 |
| <i>LOC651423</i> | XM_940575    | NA         | NA       | green | 0.62431 |
| <i>LOC653767</i> | XM_933779    | NA         | NA       | green | 0.12110 |
| <i>LOH3CR2A</i>  | NM_013343    | NA         | NA       | green | 0.04426 |
| <i>LRRC2</i>     | NM_024512    | rs11702684 | 1.83E-03 | green | 0.08202 |
| <i>LRRC20</i>    | NM_018239    | rs3015906  | 8.88E-03 | green | 0.46548 |
| <i>MAFF</i>      | NM_012323    | rs13288123 | 1.27E-03 | green | 0.04841 |
| <i>MAL</i>       | NM_002371    | rs4379388  | 1.23E-03 | green | 0.56054 |
| <i>MAL</i>       | NM_022440    | rs4379388  | 1.23E-03 | green | 0.55477 |
| <i>MAP2K3</i>    | XM_944206    | NA         | NA       | green | 0.66688 |
| <i>MAP2K6</i>    | NM_002758    | rs5918959  | 5.22E-08 | green | 0.16061 |
| <i>MAP3K8</i>    | NM_005204    | rs11150596 | 1.46E-02 | green | 0.08054 |
| <i>MAT2A</i>     | NM_005911    | rs1252199  | 9.72E-03 | green | 0.91589 |
| <i>MCL1</i>      | NM_021960    | rs6570850  | 1.15E-02 | green | 0.57698 |
| <i>MCOLN3</i>    | NM_018298    | rs4693676  | 4.67E-04 | green | 0.03886 |
| <i>MDK</i>       | NM_001012333 | rs131100   | 1.02E-02 | green | 0.31185 |

Supplementary Table 6

|                 |              |            |          |       |         |
|-----------------|--------------|------------|----------|-------|---------|
| <i>MDK</i>      | NM_001012334 | rs131100   | 1.02E-02 | green | 0.46590 |
| <i>MERTK</i>    | NM_006343    | rs4839202  | 7.48E-04 | green | 0.62496 |
| <i>MESP1</i>    | NM_018670    | rs17546468 | 5.34E-02 | green | 0.38043 |
| <i>MEST</i>     | NM_002402    | rs6780207  | 3.54E-03 | green | 0.45205 |
| <i>METRNL</i>   | NM_001004431 | rs4243200  | 1.44E-02 | green | 0.64617 |
| <i>METRNL</i>   | NM_001004431 | rs4243200  | 1.44E-02 | green | 0.73984 |
| <i>METRNL</i>   | XM_941466    | NA         | NA       | green | 0.90986 |
| <i>MFNG</i>     | NM_002405    | rs4833144  | 1.24E-04 | green | 0.04228 |
| <i>MGC14376</i> | NM_001001870 | NA         | NA       | green | 0.61301 |
| <i>MGC33846</i> | NM_175885    | NA         | NA       | green | 0.91325 |
| <i>MGC34830</i> | NM_152314    | NA         | NA       | green | 0.32121 |
| <i>MGC42367</i> | NM_207362    | NA         | NA       | green | 0.46693 |
| <i>MGC59937</i> | NM_199001    | NA         | NA       | green | 0.48392 |
| <i>MGC7036</i>  | NM_145058    | NA         | NA       | green | 0.71397 |
| <i>MGLL</i>     | NM_007283    | rs674768   | 2.96E-03 | green | 0.30750 |
| <i>MKNK2</i>    | NM_017572    | rs7958309  | 8.89E-03 | green | 0.50314 |
| <i>MKNK2</i>    | NM_199054    | rs7958309  | 8.89E-03 | green | 0.25308 |
| <i>MYADM</i>    | NM_001020820 | rs12485746 | 1.19E-02 | green | 0.82384 |
| <i>MYADM</i>    | NM_138373    | rs12485746 | 1.19E-02 | green | 0.08316 |
| <i>MYH7</i>     | NM_000257    | rs12712685 | 1.91E-03 | green | 0.24555 |
| <i>NAB1</i>     | NM_005966    | rs2286896  | 8.31E-02 | green | 0.62926 |
| <i>NAB2</i>     | NM_005967    | rs12148857 | 5.11E-03 | green | 0.93001 |
| <i>NANP</i>     | NM_152667    | rs10842572 | 9.44E-03 | green | 0.06210 |
| <i>NAT6</i>     | NM_012191    | rs2958944  | 4.08E-03 | green | 0.47521 |
| <i>NDEL1</i>    | NM_030808    | rs1882368  | 1.44E-03 | green | 0.70631 |
| <i>NDP</i>      | NM_000266    | NA         | NA       | green | 0.89556 |
| <i>NFX1</i>     | NM_147133    | rs10954906 | 1.42E-03 | green | 0.05763 |
| <i>NMI</i>      | NM_004688    | rs2071262  | 5.24E-03 | green | 0.20525 |
| <i>NMNAT2</i>   | NM_015039    | rs12757973 | 1.21E-02 | green | 0.53126 |
| <i>NMNAT2</i>   | NM_015039    | rs12757973 | 1.21E-02 | green | 0.70553 |
| <i>NOL12</i>    | NM_024313    | rs10836560 | 1.56E-02 | green | 0.17802 |
| <i>NPAL1</i>    | NM_207330    | NA         | NA       | green | 0.03783 |
| <i>NPAS1</i>    | NM_002517    | rs11991676 | 1.33E-02 | green | 0.20882 |
| <i>NPFFR1</i>   | NM_022146    | rs2885280  | 4.25E-03 | green | 0.01071 |
| <i>NPY</i>      | NM_000905    | rs11074618 | 5.03E-03 | green | 0.34505 |
| <i>NR3C1</i>    | NM_001020825 | rs10216140 | 1.06E-03 | green | 0.29635 |
| <i>NTSR1</i>    | NM_002531    | rs1450774  | 6.51E-03 | green | 0.03649 |
| <i>NUAK2</i>    | NM_030952    | rs4950989  | 8.07E-03 | green | 0.57134 |
| <i>NUDT18</i>   | NM_024815    | rs13256571 | 2.71E-02 | green | 0.43244 |
| <i>NXPH1</i>    | NM_152745    | rs10758979 | 3.28E-03 | green | 0.21552 |
| <i>NXPH4</i>    | NM_007224    | rs6763408  | 4.33E-03 | green | 0.07422 |
| <i>OPRK1</i>    | NM_000912    | rs4082297  | 4.88E-03 | green | 0.11116 |
| <i>OTUB2</i>    | NM_023112    | rs1444857  | 1.07E-02 | green | 0.11210 |
| <i>OTUD4</i>    | NM_199324    | NA         | NA       | green | 0.55436 |
| <i>PABPC1</i>   | NM_002568    | rs4772463  | 1.77E-02 | green | 0.02798 |
| <i>PARD6B</i>   | NM_032521    | rs1555672  | 4.12E-03 | green | 0.23547 |
| <i>PARP9</i>    | NM_031458    | rs6569343  | 1.06E-02 | green | 0.12446 |
| <i>PCBP4</i>    | NM_033008    | rs6499586  | 1.02E-02 | green | 0.16267 |
| <i>PCDHAC1</i>  | NM_031882    | rs964942   | 2.65E-02 | green | 0.09557 |

epilepsy

Supplementary Table 6

|                 |              |            |          |       |         |                   |
|-----------------|--------------|------------|----------|-------|---------|-------------------|
| <i>PDGFB</i>    | NM_002608    | rs5917553  | 2.33E-03 | green | 0.37773 |                   |
| <i>PDGFB</i>    | NM_033016    | rs5917553  | 2.33E-03 | green | 0.54779 |                   |
| <i>PDGFB</i>    | NM_033016    | rs5917553  | 2.33E-03 | green | 0.63665 |                   |
| <i>PDK4</i>     | NM_002612    | rs4379388  | 1.23E-03 | green | 0.13013 |                   |
| <i>PER2</i>     | NM_022817    | rs2304674  | 1.47E-03 | green | 0.24601 |                   |
| <i>PFKFB3</i>   | NM_004566    | rs2117784  | 5.92E-04 | green | 0.32003 |                   |
| <i>PHLPL</i>    | NM_015020    | NA         | NA       | green | 0.18850 |                   |
| <i>PLAT</i>     | NM_000930    | rs17557963 | 4.13E-03 | green | 0.46393 |                   |
| <i>PLD5</i>     | NM_152666    | rs192890   | 6.77E-03 | green | 0.62960 |                   |
| <i>PLEKHH2</i>  | NM_172069    | rs766117   | 8.23E-03 | green | 0.61837 |                   |
| <i>POGZ</i>     | NM_145796    | rs2170606  | 2.96E-04 | green | 0.64763 |                   |
| <i>PPARGC1B</i> | NM_133263    | rs4705079  | 1.14E-02 | green | 0.29720 |                   |
| <i>PPFIA1</i>   | NM_177423    | rs6960495  | 3.22E-03 | green | 0.05005 |                   |
| <i>PPP1R3C</i>  | NM_005398    | rs213669   | 6.86E-02 | green | 1.00000 |                   |
| <i>PRKAG2</i>   | NM_016203    | rs4725434  | 9.55E-04 | green | 0.56502 |                   |
| <i>PRO0628</i>  | NR_002764    | NA         | NA       | green | 0.10685 |                   |
| <i>PRPF4B</i>   | NM_003913    | rs2531995  | 2.64E-03 | green | 0.10149 |                   |
| <i>PTPRH</i>    | NM_002842    | rs13059601 | 2.22E-02 | green | 0.34763 |                   |
| <i>QTRTD1</i>   | NM_024638    | rs1939871  | 1.52E-02 | green | 0.64390 |                   |
| <i>RAB33A</i>   | NM_004794    | NA         | NA       | green | 0.49906 |                   |
| <i>RALGDS</i>   | NM_006266    | rs480368   | 3.78E-02 | green | 0.05218 |                   |
| <i>RALGPS2</i>  | NM_018037    | NA         | NA       | green | 0.05939 |                   |
| <i>RAPH1</i>    | NM_213589    | rs954206   | 6.81E-03 | green | 0.12331 |                   |
| <i>RARA</i>     | NM_001024809 | rs972894   | 9.62E-03 | green | 0.47006 |                   |
| <i>RASL11A</i>  | NM_206827    | rs2992299  | 1.29E-03 | green | 0.85091 |                   |
| <i>RBM3</i>     | NM_001017430 | NA         | NA       | green | 0.01355 |                   |
| <i>RHBDL3</i>   | NM_138328    | rs10968018 | 8.82E-03 | green | 0.59026 |                   |
| <i>RNF135</i>   | NM_032322    | rs2830028  | 9.36E-04 | green | 0.30619 |                   |
| <i>RNF24</i>    | NM_007219    | rs2531995  | 2.64E-03 | green | 0.45957 |                   |
| <i>RPS6KA3</i>  | NM_004586    | NA         | NA       | green | 0.44937 |                   |
| <i>RRAD</i>     | NM_004165    | rs4581806  | 5.59E-03 | green | 0.22339 |                   |
| <i>RRP22</i>    | NM_001007279 | NA         | NA       | green | 0.70419 |                   |
| <i>SAMD11</i>   | NM_152486    | rs502522   | 8.76E-03 | green | 0.05630 |                   |
| <i>SCN1B</i>    | NM_199037    | rs3783167  | 2.13E-04 | green | 0.47330 | epilepsy          |
| <i>SCN2A2</i>   | NM_021007    | NA         | NA       | green | 0.52618 | autism & epilepsy |
| <i>SCN2A2</i>   | NM_021007    | NA         | NA       | green | 0.39042 | autism & epilepsy |
| <i>SDC4</i>     | NM_002999    | rs10506255 | 3.21E-02 | green | 0.92271 |                   |
| <i>SDCCAG8</i>  | NM_006642    | rs1058304  | 3.32E-02 | green | 0.34036 |                   |
| <i>SEC14L2</i>  | NM_012429    | rs7885168  | 9.21E-03 | green | 0.62855 |                   |
| <i>SEMA4D</i>   | NM_006378    | rs12418522 | 6.55E-03 | green | 0.45172 |                   |
| <i>SEMA6D</i>   | NM_024966    | rs13033787 | 1.09E-02 | green | 0.07793 |                   |
| <i>SERTAD1</i>  | NM_013376    | rs1058041  | 7.12E-03 | green | 0.85820 |                   |
| <i>SETD3</i>    | NM_199123    | rs3935661  | 4.90E-03 | green | 0.11460 |                   |
| <i>SF1</i>      | NM_201997    | rs8039508  | 4.09E-02 | green | 0.10178 |                   |
| <i>SFRP1</i>    | NM_003012    | rs7955255  | 1.45E-03 | green | 0.32466 |                   |
| <i>SH3BGR</i>   | NM_007341    | rs11712154 | 5.09E-03 | green | 0.01248 |                   |
| <i>SH3BP1</i>   | NM_018957    | rs698295   | 9.38E-04 | green | 0.51376 |                   |
| <i>SHH</i>      | NM_000193    | rs12760229 | 1.07E-02 | green | 0.07484 |                   |
| <i>SIRT4</i>    | NM_012240    | rs332672   | 6.34E-03 | green | 0.75301 |                   |

Supplementary Table 6

|                  |              |            |          |       |         |
|------------------|--------------|------------|----------|-------|---------|
| <i>SLC25A25</i>  | NM_001006641 | rs12421135 | 4.74E-03 | green | 0.12729 |
| <i>SLC2A1</i>    | NM_006516    | rs6463175  | 8.12E-03 | green | 0.76278 |
| <i>SLC30A1</i>   | NM_021194    | rs16824906 | 5.19E-02 | green | 0.05917 |
| <i>SLC35F4</i>   | XM_936857    | NA         | NA       | green | 0.64025 |
| <i>SLC41A2</i>   | NM_032148    | rs513091   | 8.34E-04 | green | 0.50881 |
| <i>SLC6A9</i>    | NM_006934    | rs1984192  | 5.50E-04 | green | 0.55827 |
| <i>SLCO4C1</i>   | NM_180991    | rs6539053  | 1.50E-03 | green | 0.01492 |
| <i>SMAD3</i>     | NM_005902    | rs1471504  | 4.02E-03 | green | 0.85099 |
| <i>SMARCD1</i>   | NM_003076    | rs8088528  | 7.71E-03 | green | 0.03382 |
| <i>SMOX</i>      | NM_175840    | rs12601993 | 3.04E-03 | green | 0.52768 |
| <i>SMOX</i>      | NM_019025    | NA         | NA       | green | 0.66346 |
| <i>SMYD4</i>     | NM_052928    | rs9917191  | 8.34E-03 | green | 0.73231 |
| <i>SORBS1</i>    | NM_015385    | rs2404692  | 1.16E-03 | green | 0.44631 |
| <i>SOX18</i>     | NM_018419    | rs11668315 | 1.08E-02 | green | 0.48080 |
| <i>SPATA7</i>    | NM_018418    | rs11201937 | 3.84E-02 | green | 0.23693 |
| <i>SPATA7</i>    | NM_018418    | rs11201937 | 3.84E-02 | green | 0.45519 |
| <i>SPHK1</i>     | NM_021972    | rs11823867 | 2.28E-03 | green | 0.86714 |
| <i>SPINT1</i>    | NM_003710    | rs11211099 | 7.35E-03 | green | 0.29392 |
| <i>SPRED1</i>    | NM_152594    | rs698295   | 9.38E-04 | green | 0.90451 |
| <i>SRP35</i>     | NM_080743    | NA         | NA       | green | 0.58506 |
| <i>SULT1C3</i>   | NM_001008743 | rs1999487  | 4.23E-03 | green | 0.06369 |
| <i>SYT12</i>     | NM_177963    | rs11858565 | 1.30E-02 | green | 0.09398 |
| <i>SYT4</i>      | NM_020783    | rs2317512  | 4.22E-02 | green | 0.27169 |
| <i>TACSTD2</i>   | NM_002353    | rs8024629  | 3.17E-02 | green | 0.39630 |
| <i>TBC1D10A</i>  | NM_031937    | rs16997970 | 2.36E-03 | green | 0.49627 |
| <i>TEK</i>       | NM_000459    | rs16967029 | 4.27E-03 | green | 0.42363 |
| <i>TFAP4</i>     | NM_003223    | rs16989445 | 8.12E-04 | green | 0.04732 |
| <i>TFEB</i>      | NM_007162    | rs10512793 | 8.42E-04 | green | 0.40326 |
| <i>TGFA</i>      | NM_003236    | rs902726   | 1.23E-03 | green | 0.43024 |
| <i>TGFBI</i>     | NM_000358    | rs895596   | 1.82E-02 | green | 0.39722 |
| <i>TGFBR2</i>    | NM_001024847 | rs586594   | 1.15E-03 | green | 0.39754 |
| <i>TMC6</i>      | NM_007267    | rs11635996 | 9.75E-02 | green | 0.18704 |
| <i>TMCO6</i>     | NM_018502    | rs7870040  | 7.78E-03 | green | 0.06052 |
| <i>TMEM87B</i>   | NM_032824    | rs1489032  | 6.65E-03 | green | 0.55534 |
| <i>TMEPAI</i>    | NM_020182    | NA         | NA       | green | 0.46584 |
| <i>TMEPAI</i>    | NM_199169    | NA         | NA       | green | 0.92676 |
| <i>TMEPAI</i>    | NM_199169    | NA         | NA       | green | 0.92026 |
| <i>TNFRSF12A</i> | NM_016639    | rs7225748  | 6.37E-04 | green | 0.34762 |
| <i>TNFSF12</i>   | NM_003809    | rs7340751  | 8.03E-03 | green | 0.41772 |
| <i>TPCN2</i>     | NM_139075    | rs10997557 | 1.64E-03 | green | 0.22197 |
| <i>TPD52L1</i>   | NM_001003396 | rs7602423  | 1.02E-04 | green | 0.21380 |
| <i>TPD52L1</i>   | NM_001003397 | rs7602423  | 1.02E-04 | green | 0.22563 |
| <i>TRIM9</i>     | NM_052978    | rs6097043  | 9.55E-04 | green | 0.62680 |
| <i>UBE2J1</i>    | NM_016021    | rs714489   | 1.56E-02 | green | 0.55492 |
| <i>UPP1</i>      | NM_181597    | rs1959545  | 3.01E-03 | green | 0.66544 |
| <i>VCL</i>       | NM_003373    | rs6910395  | 5.90E-03 | green | 0.50017 |
| <i>XKRX</i>      | NM_212559    | NA         | NA       | green | 0.30447 |
| <i>ZFP36</i>     | NM_003407    | rs8031757  | 2.00E-02 | green | 0.33908 |
| <i>ZNF341</i>    | NM_032819    | rs10011864 | 4.49E-03 | green | 0.22668 |

Supplementary Table 6

|                  |              |            |          |       |         |
|------------------|--------------|------------|----------|-------|---------|
| <i>ZNF365</i>    | NM_014951    | rs2286614  | 1.30E-03 | green | 0.54175 |
| <i>ZNF436</i>    | NM_030634    | rs9553164  | 2.46E-03 | green | 0.33586 |
| <i>ZNF436</i>    | NM_030634    | rs9553164  | 2.46E-03 | green | 0.40358 |
| <i>ZNF503</i>    | NM_032772    | rs9917184  | 4.51E-02 | green | 0.36578 |
| <i>ZNF521</i>    | NM_015461    | rs11204153 | 4.59E-04 | green | 0.05697 |
| <i>ZNF537</i>    | NM_020856    | NA         | NA       | green | 0.76598 |
| <i>ZNF655</i>    | NM_001009957 | NA         | NA       | green | 0.01949 |
| <i>ZNF703</i>    | NM_025069    | rs13302352 | 2.28E-04 | green | 0.00900 |
| <i>ZSWIM4</i>    | NM_023072    | rs11979631 | 1.43E-03 | green | 0.60151 |
| <i>ADNP</i>      | NM_015339    | rs2215361  | 1.39E-02 | grey  | 0.09562 |
| <i>AGL</i>       | NM_000645    | rs6706188  | 3.31E-03 | grey  | 0.77270 |
| <i>ARHGAP11A</i> | NM_199357    | rs1002149  | 8.57E-03 | grey  | 0.60770 |
| <i>ARID2</i>     | NM_152641    | rs9819635  | 2.10E-03 | grey  | 0.86040 |
| <i>C1orf116</i>  | NM_023938    | rs7525449  | 2.67E-01 | grey  | 0.29783 |
| <i>C1orf32</i>   | NM_199351    | NA         | NA       | grey  | 0.00028 |
| <i>C6orf199</i>  | NM_145025    | NA         | NA       | grey  | 0.97879 |
| <i>CDH7</i>      | NM_004361    | rs9636161  | 5.00E-03 | grey  | 0.79938 |
| <i>CLEC12A</i>   | NM_138337    | rs4669512  | 7.22E-04 | grey  | 0.20300 |
| <i>CXCL6</i>     | NM_002993    | rs2377405  | 2.04E-02 | grey  | 0.28471 |
| <i>CYorf15B</i>  | NM_032576    | NA         | NA       | grey  | 0.20494 |
| <i>DGAT2L4</i>   | NM_001002254 | NA         | NA       | grey  | 0.36223 |
| <i>EFCBP1</i>    | NM_022351    | NA         | NA       | grey  | 0.63618 |
| <i>FGF13</i>     | NM_033642    | NA         | NA       | grey  | 0.62504 |
| <i>FUT2</i>      | NM_000511    | rs1370270  | 2.00E-02 | grey  | 0.00259 |
| <i>GAB1</i>      | NM_207123    | rs879740   | 4.60E-03 | grey  | 0.69990 |
| <i>HCG4</i>      | NR_002139    | rs12547428 | 6.04E-03 | grey  | 0.00306 |
| <i>HSDL1</i>     | NM_031463    | rs1123203  | 1.19E-02 | grey  | 0.70838 |
| <i>IL17C</i>     | NM_013278    | rs2814730  | 2.58E-02 | grey  | 0.12179 |
| <i>KLC4</i>      | NM_201523    | rs1027413  | 2.09E-02 | grey  | 0.01867 |
| <i>KRTAP12-4</i> | NM_198698    | rs718798   | 1.35E-03 | grey  | 0.02325 |
| <i>LARP4</i>     | NM_052879    | rs11903014 | 9.25E-03 | grey  | 0.47446 |
| <i>LGI4</i>      | NM_139284    | rs1077330  | 6.46E-03 | grey  | 0.07356 |
| <i>LIMD2</i>     | NM_030576    | rs11603417 | 9.13E-05 | grey  | 0.00234 |
| <i>LOC253012</i> | NM_198151    | NA         | NA       | grey  | 0.22403 |
| <i>LOC649516</i> | XM_943751    | NA         | NA       | grey  | 0.41215 |
| <i>LOC653558</i> | XM_928059    | NA         | NA       | grey  | 0.80953 |
| <i>LRRC48</i>    | NM_031294    | rs7119188  | 5.06E-04 | grey  | 0.93241 |
| <i>MUSK</i>      | NM_005592    | rs1489032  | 6.65E-03 | grey  | 0.70185 |
| <i>NCF4</i>      | NM_013416    | rs286411   | 7.75E-04 | grey  | 0.33436 |
| <i>PPIL4</i>     | NM_139126    | rs17025017 | 1.53E-02 | grey  | 0.14246 |
| <i>PRO0611</i>   | NR_002762    | rs7812391  | 7.25E-03 | grey  | 0.05652 |
| <i>PSORS1C1</i>  | NM_014068    | rs6870556  | 5.43E-03 | grey  | 0.83452 |
| <i>RAPSN</i>     | NM_032645    | rs9357530  | 1.98E-02 | grey  | 0.94959 |
| <i>RECK</i>      | NM_021111    | rs17203014 | 2.17E-04 | grey  | 0.76184 |
| <i>RPS6KC1</i>   | NM_012424    | rs7580725  | 2.44E-02 | grey  | 0.36692 |
| <i>SDC1</i>      | NM_002997    | rs11624594 | 8.09E-04 | grey  | 0.04668 |
| <i>SLC28A1</i>   | NM_004213    | rs16944618 | 2.18E-02 | grey  | 0.23147 |
| <i>SLC29A4</i>   | NM_001040661 | rs1995205  | 9.31E-03 | grey  | 0.04409 |
| <i>SLC5A12</i>   | NM_001042366 | NA         | NA       | grey  | 0.47241 |

Supplementary Table 6

|                      |              |            |          |         |         |          |
|----------------------|--------------|------------|----------|---------|---------|----------|
| <i>SNORA32</i>       | NR_003032    | rs316123   | 4.19E-02 | grey    | 0.08786 |          |
| <i>SYNE2</i>         | NM_182910    | rs1059440  | 3.07E-03 | grey    | 0.51562 |          |
| <i>TBX20</i>         | NM_001077653 | rs2701516  | 1.79E-04 | grey    | 0.07929 |          |
| <i>TMEM67</i>        | NM_153704    | rs1622018  | 6.77E-03 | grey    | 0.16415 |          |
| <i>ZNF510</i>        | NM_014930    | rs10892901 | 3.08E-03 | grey    | 1.00000 |          |
| <i>ZNF596</i>        | NM_173539    | rs727056   | 2.01E-03 | grey    | 0.43994 |          |
| <i>ZNF625</i>        | NM_145233    | rs17422381 | 5.07E-03 | grey    | 0.89013 |          |
| <i>ANKRA2</i>        | NM_023039    | rs7099452  | 2.00E-02 | hotpink | 0.67699 |          |
| <i>ARHGAP24</i>      | NM_001025616 | rs4843301  | 5.09E-03 | hotpink | 0.42348 |          |
| <i>ARID5A</i>        | NM_212481    | rs2579502  | 7.23E-03 | hotpink | 0.62463 |          |
| <i>BCL2L12</i>       | NM_138639    | rs2012146  | 5.82E-03 | hotpink | 0.74551 |          |
| <i>BDH2</i>          | NM_020139    | rs9519469  | 4.09E-02 | hotpink | 0.20914 |          |
| <i>C10orf10</i>      | NM_007021    | rs609643   | 9.58E-03 | hotpink | 0.15481 |          |
| <i>CKMT1A</i>        | NM_001015001 | rs10512793 | 8.42E-04 | hotpink | 0.30793 |          |
| <i>CLCN6</i>         | NM_001286    | rs9348951  | 5.54E-03 | hotpink | 0.28427 |          |
| <i>DENND2D</i>       | NM_024901    | rs7056297  | 2.55E-02 | hotpink | 0.41090 |          |
| <i>EHHADH</i>        | NM_001966    | rs9852812  | 1.77E-03 | hotpink | 1.00000 |          |
| <i>GABRB1</i>        | NM_000812    | rs1077216  | 1.10E-03 | hotpink | 0.32040 | autism   |
| <i>GNA13</i>         | NM_006572    | rs13064050 | 5.02E-03 | hotpink | 0.25546 |          |
| <i>IRXL1</i>         | NM_173576    | NA         | NA       | hotpink | 0.89679 |          |
| <i>ITGA6</i>         | NM_000210    | rs736077   | 2.03E-03 | hotpink | 0.38312 |          |
| <i>MCART6</i>        | NM_001012755 | NA         | NA       | hotpink | 0.38927 |          |
| <i>OTX1</i>          | NM_014562    | rs11520658 | 8.13E-03 | hotpink | 0.51128 | epilepsy |
| <i>PCYT1B</i>        | NM_004845    | NA         | NA       | hotpink | 0.74972 |          |
| <i>RCCD1</i>         | NM_001017919 | rs2622629  | 3.07E-02 | hotpink | 0.44858 |          |
| <i>RFX4</i>          | NM_002920    | rs1890227  | 3.09E-03 | hotpink | 0.32884 |          |
| <i>RNASEL</i>        | NM_021133    | rs9685097  | 1.37E-02 | hotpink | 0.71482 |          |
| <i>SCCPDH</i>        | NM_016002    | rs7513496  | 1.80E-01 | hotpink | 0.45389 |          |
| <i>SORBS1</i>        | NM_006434    | rs2404692  | 1.16E-03 | hotpink | 0.77209 |          |
| <i>TEX15</i>         | NM_031271    | rs12915554 | 1.15E-03 | hotpink | 0.36071 |          |
| <i>TMEM38A</i>       | NM_024074    | rs12221081 | 4.45E-03 | hotpink | 0.59129 |          |
| <i>XKR6</i>          | NM_001012239 | NA         | NA       | hotpink | 0.16503 |          |
|                      | 2-Sep        |            |          |         |         |          |
|                      | NM_052838    | NA         | NA       | magenta | 0.09119 |          |
| <i>ABHD7</i>         | NM_173567    | NA         | NA       | magenta | 0.05650 |          |
| <i>ACY1L2</i>        | NM_001010853 | NA         | NA       | magenta | 0.86142 |          |
| <i>APAF1</i>         | NM_181869    | rs11214229 | 2.48E-03 | magenta | 0.05988 |          |
| <i>AQR</i>           | NM_014691    | rs7014840  | 7.85E-04 | magenta | 0.45832 |          |
| <i>CENTD2</i>        | NM_015242    | NA         | NA       | magenta | 0.02477 |          |
| <i>CHAC1</i>         | NM_024111    | rs6065290  | 3.28E-02 | magenta | 0.35923 |          |
| <i>COL4A5</i>        | NM_033380    | NA         | NA       | magenta | 0.87678 |          |
| <i>DKFZp564N2472</i> | NM_182595    | NA         | NA       | magenta | 0.19521 |          |
| <i>DST</i>           | NM_183380    | NA         | NA       | magenta | 0.26517 |          |
| <i>EMR2</i>          | NM_152916    | rs12601076 | 5.77E-03 | magenta | 0.18559 |          |
| <i>ENPP2</i>         | NM_001040092 | rs7129402  | 4.41E-02 | magenta | 1.00000 |          |
| <i>FLJ23657</i>      | NM_178497    | NA         | NA       | magenta | 0.02507 |          |
| <i>FLJ40869</i>      | NM_182625    | NA         | NA       | magenta | 0.00020 |          |
| <i>GPC3</i>          | NM_004484    | NA         | NA       | magenta | 0.52151 |          |
| <i>KCNE4</i>         | NM_080671    | rs12737248 | 4.09E-02 | magenta | 0.96550 |          |
| <i>KIAA0265</i>      | NM_014997    | NA         | NA       | magenta | 0.45403 |          |

Supplementary Table 6

|                  |              |            |          |         |         |        |
|------------------|--------------|------------|----------|---------|---------|--------|
| <i>LOC139886</i> | NM_001012968 | NA         | NA       | magenta | 0.79002 |        |
| <i>MYO3A</i>     | NM_017433    | rs2830038  | 6.21E-05 | magenta | 0.54380 |        |
| <i>NCOR2</i>     | NM_006312    | rs4296799  | 3.73E-03 | magenta | 0.58470 |        |
| <i>NIN</i>       | NM_020921    | rs2282751  | 9.49E-04 | magenta | 0.80868 |        |
| <i>NKX6-3</i>    | NM_152568    | rs16871561 | 1.30E-03 | magenta | 0.06643 |        |
| <i>NUP98</i>     | NM_005387    | rs8046065  | 2.38E-03 | magenta | 0.09691 |        |
| <i>OR11L1</i>    | NM_001001959 | rs12096473 | 2.54E-01 | magenta | 0.16945 |        |
| <i>PCDH8</i>     | NM_002590    | rs6974261  | 4.00E-03 | magenta | 0.52279 |        |
| <i>PLXND1</i>    | NM_015103    | rs10014141 | 1.10E-02 | magenta | 0.00149 |        |
| <i>PROKR2</i>    | NM_144773    | rs1034917  | 6.66E-03 | magenta | 0.16432 |        |
| <i>ROCK1</i>     | NM_005406    | rs4321183  | 9.42E-04 | magenta | 0.37546 |        |
| <i>RPE</i>       | NM_199229    | rs1774249  | 3.94E-01 | magenta | 0.06482 |        |
| <i>SDK1</i>      | NM_152744    | rs2880892  | 1.71E-04 | magenta | 0.48921 |        |
| <i>SEMA5A</i>    | NM_003966    | rs7780856  | 9.27E-04 | magenta | 0.74099 | autism |
| <i>SLC6A15</i>   | NM_182767    | rs4243779  | 1.20E-02 | magenta | 0.49563 |        |
| <i>UNK</i>       | NM_001080419 | rs17148885 | 3.61E-02 | magenta | 0.07025 |        |
| <i>VPS13C</i>    | NM_018080    | rs2726555  | 1.51E-03 | magenta | 0.88346 |        |
| <i>YWHAZ</i>     | NM_003406    | rs2749065  | 6.47E-03 | magenta | 0.20205 |        |
| <i>A2BP1</i>     | NM_018723    | NA         | NA       | navy    | 0.02743 | autsim |
| <i>AADACL1</i>   | NM_020792    | NA         | NA       | navy    | 0.25905 |        |
| <i>AASDH</i>     | NM_181806    | rs10489618 | 3.84E-02 | navy    | 0.73572 |        |
| <i>ABCG1</i>     | NM_207629    | rs4624285  | 5.81E-03 | navy    | 0.03877 |        |
| <i>ABL2</i>      | NM_005158    | rs11731185 | 7.56E-03 | navy    | 0.01120 |        |
| <i>ADRA1A</i>    | NM_000680    | rs2992299  | 1.29E-03 | navy    | 0.02459 |        |
| <i>AFF2</i>      | NM_002025    | NA         | NA       | navy    | 0.14012 |        |
| <i>AGL</i>       | NM_000645    | rs6706188  | 3.31E-03 | navy    | 0.64413 |        |
| <i>ALDH4A1</i>   | NM_170726    | rs7897030  | 1.38E-02 | navy    | 0.00940 |        |
| <i>AMY1B</i>     | NM_001008218 | NA         | NA       | navy    | 0.04439 |        |
| <i>ARL10</i>     | NM_173664    | rs1885020  | 4.04E-03 | navy    | 0.12948 |        |
| <i>ARPC4</i>     | NM_005718    | rs3786095  | 1.84E-04 | navy    | 0.03209 |        |
| <i>ARPP-21</i>   | NM_016300    | NA         | NA       | navy    | 0.09824 |        |
| <i>ARRDC4</i>    | NM_183376    | rs9516775  | 1.68E-02 | navy    | 0.73709 |        |
| <i>ASAH1</i>     | NM_014435    | NA         | NA       | navy    | 0.01033 |        |
| <i>ATP11C</i>    | NM_173694    | NA         | NA       | navy    | 0.09327 |        |
| <i>ATP11C</i>    | NM_173694    | NA         | NA       | navy    | 0.14062 |        |
| <i>ATPBD3</i>    | NM_145232    | NA         | NA       | navy    | 0.21061 |        |
| <i>ATRX</i>      | NM_138270    | NA         | NA       | navy    | 0.20546 |        |
| <i>BACE1</i>     | NM_138972    | rs7071812  | 6.36E-02 | navy    | 0.32128 |        |
| <i>BAG5</i>      | NM_001015048 | rs11164621 | 1.14E-02 | navy    | 0.26073 |        |
| <i>BDH</i>       | NM_203314    | NA         | NA       | navy    | 0.00524 |        |
| <i>C10orf104</i> | NM_173473    | NA         | NA       | navy    | 0.10388 |        |
| <i>C11orf38</i>  | NM_212555    | NA         | NA       | navy    | 0.23146 |        |
| <i>C3orf17</i>   | NM_015412    | rs6907551  | 2.32E-03 | navy    | 0.03428 |        |
| <i>C6orf117</i>  | NM_138409    | NA         | NA       | navy    | 0.12216 |        |
| <i>CABLES1</i>   | NM_138375    | rs10511668 | 7.72E-03 | navy    | 0.18620 |        |
| <i>CALN1</i>     | NM_031468    | rs1351419  | 4.06E-04 | navy    | 0.84852 |        |
| <i>CAPS</i>      | NM_080590    | rs32566    | 8.67E-03 | navy    | 0.14564 |        |
| <i>CCNDBP1</i>   | NM_037370    | rs17763104 | 6.97E-03 | navy    | 0.30819 |        |
| <i>CD247</i>     | NM_198053    | rs3820390  | 1.03E-02 | navy    | 0.30199 |        |

Supplementary Table 6

|                       |              |            |          |      |         |        |
|-----------------------|--------------|------------|----------|------|---------|--------|
| <i>CDA</i>            | NM_001785    | rs4977732  | 2.64E-02 | navy | 0.06488 |        |
| <i>CENPJ</i>          | NM_018451    | rs1394764  | 3.89E-03 | navy | 0.11152 |        |
| <i>CEP170</i>         | NM_014812    | rs3936203  | 2.91E-01 | navy | 0.03388 |        |
| <i>CGI-09</i>         | NM_015939    | NA         | NA       | navy | 0.06166 |        |
| <i>COL17A1</i>        | NM_000494    | rs2893638  | 2.95E-04 | navy | 0.01884 |        |
| <i>CTSH</i>           | NM_004390    | rs8005999  | 3.69E-04 | navy | 0.10042 |        |
| <i>CUL3</i>           | NM_003590    | rs2802268  | 4.45E-02 | navy | 0.52038 |        |
| <i>DAAM1</i>          | NM_014992    | rs2570100  | 1.32E-03 | navy | 0.89912 |        |
| <i>DAZAP1</i>         | NM_170711    | rs1538721  | 1.48E-03 | navy | 0.00866 |        |
| <i>DCLRE1B</i>        | NM_022836    | rs11153450 | 2.03E-03 | navy | 0.08957 |        |
| <i>DGKE</i>           | NM_003647    | rs4286900  | 2.39E-02 | navy | 0.01447 |        |
| <i>DIAPH3</i>         | NM_001042517 | rs6850334  | 2.73E-05 | navy | 0.04227 |        |
| <i>DKFZp686l15217</i> | NM_207495    | NA         | NA       | navy | 0.70464 |        |
| <i>DLG3</i>           | NM_021120    | NA         | NA       | navy | 0.13372 |        |
| <i>DMD</i>            | NM_004019    | NA         | NA       | navy | 0.12297 | autism |
| <i>DNAJA4</i>         | NM_018602    | rs308927   | 6.64E-03 | navy | 0.08708 |        |
| <i>DONSON</i>         | NM_017613    | rs2804875  | 9.60E-03 | navy | 0.19767 |        |
| <i>DRD3</i>           | NM_033663    | rs10787493 | 1.50E-02 | navy | 0.08116 | autism |
| <i>EFHC2</i>          | NM_025184    | NA         | NA       | navy | 0.09959 |        |
| <i>ELOVL5</i>         | NM_021814    | rs750456   | 1.37E-03 | navy | 0.14527 |        |
| <i>EPC2</i>           | NM_015630    | rs9283119  | 6.03E-03 | navy | 0.04058 |        |
| <i>ERCC1</i>          | NM_202001    | rs4479142  | 6.00E-03 | navy | 0.03530 |        |
| <i>FAAH</i>           | NM_001441    | rs2416025  | 7.55E-04 | navy | 0.19062 |        |
| <i>FGD6</i>           | NM_018351    | rs12429818 | 8.00E-03 | navy | 0.76284 |        |
| <i>FLJ30046</i>       | NM_144595    | NA         | NA       | navy | 0.79271 |        |
| <i>FLJ39501</i>       | NM_173483    | NA         | NA       | navy | 0.01587 |        |
| <i>FLJ42177</i>       | NM_001001706 | NA         | NA       | navy | 0.15725 |        |
| <i>FLJ45224</i>       | NM_207510    | NA         | NA       | navy | 0.03462 |        |
| <i>FLJ45645</i>       | NM_198557    | NA         | NA       | navy | 0.23674 |        |
| <i>FOXF1</i>          | NM_001451    | rs4907105  | 8.62E-03 | navy | 0.04406 |        |
| <i>FPGS</i>           | NM_004957    | rs913287   | 1.88E-03 | navy | 0.00533 |        |
| <i>FRS2</i>           | NM_006654    | rs10878992 | 4.56E-03 | navy | 0.01716 |        |
| <i>GABARAPL2</i>      | NM_007285    | rs1359872  | 9.39E-03 | navy | 0.05194 |        |
| <i>GALK2</i>          | NM_001001556 | rs2426147  | 2.64E-03 | navy | 0.74870 |        |
| <i>GAST</i>           | NM_000805    | rs1884798  | 1.33E-02 | navy | 0.13841 |        |
| <i>GBP3</i>           | NM_018284    | rs825954   | 1.51E-02 | navy | 0.32448 |        |
| <i>GSDML</i>          | NM_018530    | NA         | NA       | navy | 0.02976 |        |
| <i>HECW2</i>          | NM_020760    | rs1475169  | 9.11E-03 | navy | 0.41832 |        |
| <i>HK2</i>            | NM_000189    | rs4746136  | 1.80E-02 | navy | 0.02095 |        |
| <i>HS1BP3</i>         | NM_022460    | rs1554368  | 6.14E-03 | navy | 0.72615 |        |
| <i>HS6ST1</i>         | NM_004807    | rs9398869  | 1.01E-02 | navy | 0.15564 |        |
| <i>HSF4</i>           | NM_001538    | rs2371382  | 9.10E-02 | navy | 0.11106 |        |
| <i>ID2</i>            | NM_002166    | rs7634632  | 5.48E-03 | navy | 0.59592 |        |
| <i>IGSF1</i>          | NM_205833    | NA         | NA       | navy | 0.05669 |        |
| <i>ING4</i>           | NM_198287    | NA         | NA       | navy | 0.19390 |        |
| <i>ITGB4</i>          | NM_001005619 | rs1351419  | 4.06E-04 | navy | 0.00953 |        |
| <i>JMJD1A</i>         | NM_018433    | NA         | NA       | navy | 0.26562 |        |
| <i>JPH2</i>           | NM_175913    | rs1393019  | 1.44E-02 | navy | 0.06059 |        |
| <i>KCNA6</i>          | NM_002235    | rs7956904  | 3.34E-03 | navy | 0.02027 |        |



Supplementary Table 6

|                  |              |            |          |      |         |                   |
|------------------|--------------|------------|----------|------|---------|-------------------|
| <i>KIAA1370</i>  | NM_019600    | rs6097043  | 9.55E-04 | navy | 1.00000 |                   |
| <i>LOC130576</i> | NM_177964    | NA         | NA       | navy | 0.03223 |                   |
| <i>LOC196394</i> | NM_207337    | NA         | NA       | navy | 0.79097 |                   |
| <i>LOC51057</i>  | NM_015910    | NA         | NA       | navy | 0.36522 |                   |
| <i>LOC641847</i> | XM_935587    | NA         | NA       | navy | 0.04628 |                   |
| <i>LOC648148</i> | XM_937203    | NA         | NA       | navy | 0.03762 |                   |
| <i>LOC649588</i> | XM_943783    | NA         | NA       | navy | 0.03070 |                   |
| <i>LOC654129</i> | XM_939732    | NA         | NA       | navy | 0.07980 |                   |
| <i>LONRF3</i>    | NM_024778    | NA         | NA       | navy | 0.11461 |                   |
| <i>LRRC15</i>    | NM_130830    | rs12139826 | 1.16E-01 | navy | 0.37597 |                   |
| <i>LRRTM3</i>    | NM_178011    | rs12754452 | 1.14E-03 | navy | 0.26940 |                   |
| <i>LTBP4</i>     | NM_003573    | rs13033787 | 1.09E-02 | navy | 0.00918 |                   |
| <i>MAML2</i>     | NM_032427    | rs4509239  | 2.31E-03 | navy | 0.15592 |                   |
| <i>MANEAL</i>    | NM_152496    | rs17127036 | 1.66E-02 | navy | 0.02516 |                   |
| <i>MAPK11</i>    | NM_138993    | NA         | NA       | navy | 0.22120 |                   |
| <i>MBP</i>       | NM_001025090 | rs1561104  | 1.71E-03 | navy | 0.02352 |                   |
| <i>MDS032</i>    | NM_018467    | NA         | NA       | navy | 0.01270 |                   |
| <i>MECP2</i>     | NM_004992    | NA         | NA       | navy | 0.30348 | autism & epilepsy |
| <i>MFHAS1</i>    | NM_004225    | rs7257704  | 4.56E-03 | navy | 0.10806 |                   |
| <i>MGC20983</i>  | NM_145045    | NA         | NA       | navy | 0.30640 |                   |
| <i>MGC39900</i>  | NM_194324    | NA         | NA       | navy | 0.13898 |                   |
| <i>MGC39900</i>  | XM_936687    | NA         | NA       | navy | 0.14553 |                   |
| <i>MGST1</i>     | NM_020300    | rs12740413 | 3.85E-03 | navy | 0.01628 |                   |
| <i>MIA3</i>      | NM_198551    | rs1454542  | 2.11E-01 | navy | 0.56175 |                   |
| <i>MMP7</i>      | NM_002423    | rs4764926  | 1.89E-02 | navy | 0.02334 |                   |
| <i>MSH5</i>      | NM_025259    | rs4445     | 5.63E-03 | navy | 0.28880 |                   |
| <i>MT1E</i>      | NM_175617    | rs1461796  | 1.11E-03 | navy | 0.10095 |                   |
| <i>MTRR</i>      | NM_002454    | rs7703033  | 2.63E-03 | navy | 0.21457 |                   |
| <i>NAPE-PLD</i>  | NM_198990    | NA         | NA       | navy | 0.33111 |                   |
| <i>NBPF1</i>     | NM_017940    | rs4321183  | 9.42E-04 | navy | 0.77148 |                   |
| <i>NCOA1</i>     | NM_147223    | rs2975186  | 1.78E-03 | navy | 0.40520 |                   |
| <i>NDRG4</i>     | NM_020465    | rs890632   | 1.36E-03 | navy | 0.13353 |                   |
| <i>NFKBIL2</i>   | NM_013432    | NA         | NA       | navy | 0.18117 |                   |
| <i>NOPE</i>      | NM_020962    | NA         | NA       | navy | 0.91074 |                   |
| <i>NOX1</i>      | NM_013954    | NA         | NA       | navy | 0.10612 |                   |
| <i>NRXN3</i>     | NM_004796    | rs10793345 | 1.70E-04 | navy | 0.04178 |                   |
| <i>NUDT6</i>     | NM_198041    | rs2611428  | 4.50E-03 | navy | 0.03028 |                   |
| <i>ORC4L</i>     | NM_181742    | NA         | NA       | navy | 0.89682 |                   |
| <i>OSRF</i>      | NM_012382    | NA         | NA       | navy | 0.18429 |                   |
| <i>PARD6A</i>    | NM_016948    | rs10518758 | 7.32E-02 | navy | 0.04695 |                   |
| <i>PARP16</i>    | NM_017851    | rs4948491  | 2.82E-02 | navy | 0.07779 |                   |
| <i>PCDHA12</i>   | NM_018903    | rs6577995  | 5.22E-03 | navy | 0.15565 |                   |
| <i>PCDHA3</i>    | NM_031497    | rs16910093 | 1.87E-02 | navy | 0.51337 |                   |
| <i>PCDHB16</i>   | NM_020957    | rs9874641  | 4.96E-02 | navy | 0.09875 |                   |
| <i>PDIA2</i>     | NM_006849    | rs10967209 | 1.34E-02 | navy | 0.02436 |                   |
| <i>PDLIM2</i>    | NM_198042    | rs7061317  | 7.69E-03 | navy | 0.01577 |                   |
| <i>PFKFB2</i>    | NM_001018053 | rs6690037  | 3.06E-01 | navy | 0.32067 |                   |
| <i>PIAS2</i>     | XM_938229    | NA         | NA       | navy | 0.02604 |                   |
| <i>PLA2G5</i>    | NM_000929    | rs11624594 | 8.09E-04 | navy | 0.04751 |                   |

Supplementary Table 6

|                 |              |            |          |      |         |
|-----------------|--------------|------------|----------|------|---------|
| <i>POFUT2</i>   | NM_015227    | rs875511   | 5.38E-03 | navy | 0.65804 |
| <i>PRKAA2</i>   | NM_006252    | rs6123836  | 5.17E-03 | navy | 0.03583 |
| <i>PRKDC</i>    | NM_006904    | rs8092993  | 5.16E-03 | navy | 0.12354 |
| <i>PRPF4B</i>   | NM_176800    | NA         | NA       | navy | 0.14606 |
| <i>PTBP2</i>    | NM_021190    | rs12640523 | 3.49E-04 | navy | 0.77067 |
| <i>PTD004</i>   | NM_013341    | NA         | NA       | navy | 0.75128 |
| <i>PTPRE</i>    | NM_130435    | rs1487608  | 3.32E-03 | navy | 0.11704 |
| <i>PTRH2</i>    | NM_001015509 | NA         | NA       | navy | 0.07117 |
| <i>PVRL1</i>    | NM_203286    | rs7604059  | 1.25E-02 | navy | 0.00994 |
| <i>PWP2H</i>    | NM_005049    | NA         | NA       | navy | 0.27800 |
| <i>RAB37</i>    | NM_001006638 | rs4892210  | 1.50E-02 | navy | 0.12131 |
| <i>RFFL</i>     | NM_057178    | rs1264581  | 7.52E-03 | navy | 0.00625 |
| <i>RFX2</i>     | NM_134433    | rs6500756  | 1.34E-03 | navy | 0.72323 |
| <i>RNASE1</i>   | NM_198235    | rs4128285  | 5.49E-03 | navy | 0.01804 |
| <i>RPS29</i>    | NM_001030001 | rs3913665  | 1.83E-02 | navy | 0.09993 |
| <i>RTN3</i>     | NM_006054    | rs2150031  | 6.09E-04 | navy | 0.89344 |
| <i>SCAP1</i>    | NM_003726    | rs2838281  | 5.13E-04 | navy | 0.03905 |
| <i>SGK3</i>     | NM_170709    | rs11691501 | 5.17E-03 | navy | 0.07801 |
| <i>SH2D3C</i>   | NM_005489    | rs11018376 | 4.55E-03 | navy | 0.05214 |
| <i>SKAP2</i>    | NM_003930    | rs2992299  | 1.29E-03 | navy | 0.08640 |
| <i>SLC8A3</i>   | NM_182936    | rs17086457 | 8.19E-04 | navy | 0.00492 |
| <i>SNAP23</i>   | NM_130798    | rs4711637  | 4.73E-03 | navy | 0.01946 |
| <i>SNRPD2</i>   | NM_177542    | rs3914729  | 1.70E-03 | navy | 0.05032 |
| <i>SOX1</i>     | NM_005986    | rs7069128  | 2.71E-02 | navy | 0.43432 |
| <i>SOX5</i>     | NM_152989    | rs783454   | 3.97E-04 | navy | 0.05146 |
| <i>SP5</i>      | NM_001003845 | rs17750151 | 7.27E-02 | navy | 0.46648 |
| <i>SP8</i>      | NM_182700    | rs4977732  | 2.64E-02 | navy | 0.65158 |
| <i>SPAST</i>    | NM_199436    | rs2124748  | 3.20E-05 | navy | 0.27927 |
| <i>ST3GAL1</i>  | NM_003033    | rs7628262  | 1.36E-02 | navy | 0.05510 |
| <i>SUV420H1</i> | NM_017635    | rs7753849  | 4.68E-04 | navy | 0.20022 |
| <i>TEKT3</i>    | NM_031898    | rs4721415  | 1.20E-02 | navy | 0.03433 |
| <i>TMEM110</i>  | NM_198563    | rs4687554  | 2.45E-03 | navy | 0.02821 |
| <i>TMEM117</i>  | NM_032256    | rs225436   | 3.99E-03 | navy | 0.03057 |
| <i>TNRC6C</i>   | NM_018996    | rs10879852 | 1.42E-03 | navy | 0.29946 |
| <i>TRAF6</i>    | NM_004620    | rs752775   | 3.98E-03 | navy | 0.20855 |
| <i>TRIM5</i>    | NM_033092    | rs1430004  | 9.11E-03 | navy | 0.06150 |
| <i>TSPAN18</i>  | NM_130783    | rs718798   | 1.35E-03 | navy | 0.04154 |
| <i>TXNDC8</i>   | NM_001003936 | rs475620   | 2.34E-03 | navy | 0.03187 |
| <i>UMPS</i>     | NM_000373    | rs4937154  | 2.49E-02 | navy | 0.11776 |
| <i>UPP2</i>     | NM_173355    | rs11685602 | 4.51E-02 | navy | 0.01161 |
| <i>USP16</i>    | NM_001032410 | rs2175835  | 1.03E-02 | navy | 0.66382 |
| <i>VAPA</i>     | NM_194434    | rs1557978  | 1.34E-02 | navy | 0.80183 |
| <i>VASP</i>     | NM_003370    | rs12609834 | 9.48E-03 | navy | 0.06231 |
| <i>WDR16</i>    | NM_145054    | rs2654718  | 2.71E-03 | navy | 0.06792 |
| <i>ZC3H12B</i>  | NM_001010888 | NA         | NA       | navy | 0.79100 |
| <i>ZFP36L1</i>  | NM_004926    | rs17425781 | 5.38E-03 | navy | 0.07523 |
| <i>ZMYND15</i>  | NM_032265    | rs754814   | 2.75E-02 | navy | 0.14993 |
| <i>ZNF19</i>    | NM_006961    | rs1790834  | 2.54E-02 | navy | 0.31590 |
| <i>ZNF266</i>   | NM_006631    | rs7780856  | 9.27E-04 | navy | 0.32606 |

Supplementary Table 6

|                 |              |            |          |        |         |
|-----------------|--------------|------------|----------|--------|---------|
| <i>ZNF429</i>   | NM_001001415 | rs10437776 | 2.43E-03 | navy   | 0.24727 |
| <i>ZNF501</i>   | NM_145044    | rs7904676  | 8.30E-03 | navy   | 0.20346 |
| <i>ZNF608</i>   | NM_020747    | rs1011151  | 1.48E-03 | navy   | 0.78651 |
| <i>ZPLD1</i>    | NM_175056    | rs10861271 | 2.44E-03 | navy   | 0.00370 |
| <i>ZWILCH</i>   | NM_017975    | rs8052896  | 8.45E-03 | navy   | 0.04017 |
| <i>ABCC11</i>   | NM_033151    | rs957881   | 6.54E-03 | orange | 0.11722 |
| <i>ADAM10</i>   | NM_001110    | rs2968217  | 2.91E-03 | orange | 0.11290 |
| <i>APLP2</i>    | NM_001642    | rs3021211  | 1.18E-03 | orange | 0.39267 |
| <i>ARL6IP1</i>  | NM_015161    | rs4721719  | 7.51E-03 | orange | 0.07616 |
| <i>ASTL</i>     | NM_001002036 | rs749458   | 8.79E-04 | orange | 0.16799 |
| <i>ATAD4</i>    | NM_024320    | NA         | NA       | orange | 0.71239 |
| <i>BCL2L14</i>  | NM_138724    | NA         | NA       | orange | 0.03099 |
| <i>BMP2K</i>    | NM_017593    | rs1870923  | 3.76E-03 | orange | 0.21663 |
| <i>C11orf30</i> | NM_020193    | rs7237754  | 2.27E-03 | orange | 0.42517 |
| <i>C17orf38</i> | NM_001010855 | NA         | NA       | orange | 0.16668 |
| <i>C17orf46</i> | NM_152343    | rs42800    | 3.46E-02 | orange | 0.23522 |
| <i>C17orf83</i> | NM_199339    | NA         | NA       | orange | 0.18117 |
| <i>C1orf111</i> | NM_182581    | rs4665145  | 7.11E-03 | orange | 0.06241 |
| <i>C1orf92</i>  | NM_144702    | rs1982657  | 1.29E-02 | orange | 0.41997 |
| <i>C7orf29</i>  | NM_138434    | rs2170606  | 2.96E-04 | orange | 0.12532 |
| <i>CARD11</i>   | NM_032415    | rs8078781  | 1.59E-04 | orange | 0.74186 |
| <i>CCDC63</i>   | NM_152591    | rs9301445  | 1.01E-02 | orange | 0.28280 |
| <i>CCL23</i>    | NM_005064    | rs17647070 | 1.55E-02 | orange | 0.66145 |
| <i>CD164</i>    | NM_006016    | rs1339760  | 3.53E-02 | orange | 0.21554 |
| <i>CD86</i>     | NM_175862    | rs3135766  | 8.05E-03 | orange | 0.16949 |
| <i>CEACAM1</i>  | NM_001024912 | rs10165893 | 7.51E-04 | orange | 0.65833 |
| <i>CELSR1</i>   | NM_014246    | rs12712937 | 3.03E-03 | orange | 0.32699 |
| <i>CENTD1</i>   | NM_015230    | NA         | NA       | orange | 0.22957 |
| <i>CHAD</i>     | NM_001267    | rs6761327  | 3.91E-02 | orange | 0.17258 |
| <i>CIDEB</i>    | NM_014430    | rs10966105 | 7.85E-03 | orange | 0.25635 |
| <i>COL12A1</i>  | NM_080645    | rs7237754  | 2.27E-03 | orange | 0.45033 |
| <i>COP1</i>     | NM_052889    | NA         | NA       | orange | 0.11194 |
| <i>CPN2</i>     | XM_942072    | NA         | NA       | orange | 0.61315 |
| <i>CRISP2</i>   | NM_003296    | rs4768967  | 2.86E-02 | orange | 0.20106 |
| <i>CTSE</i>     | NM_148964    | rs6748358  | 1.14E-01 | orange | 0.23080 |
| <i>CYLC2</i>    | NM_001340    | rs9582985  | 1.81E-02 | orange | 0.53862 |
| <i>DEFB123</i>  | NM_153324    | rs1958979  | 1.19E-03 | orange | 0.20413 |
| <i>DPY19L2</i>  | NM_173812    | rs3755827  | 7.47E-04 | orange | 0.10354 |
| <i>DSPG3</i>    | NM_004950    | NA         | NA       | orange | 0.67945 |
| <i>DUSP13</i>   | NM_001007271 | rs830786   | 4.12E-03 | orange | 0.16657 |
| <i>EGFL8</i>    | NM_030652    | rs1531746  | 2.37E-02 | orange | 0.40247 |
| <i>EVC2</i>     | NM_147127    | rs10852665 | 3.90E-03 | orange | 0.17686 |
| <i>FBXW8</i>    | NM_012174    | rs7759765  | 3.00E-03 | orange | 0.61449 |
| <i>FLJ13265</i> | NM_024877    | NA         | NA       | orange | 0.27372 |
| <i>FLJ16231</i> | NM_001008401 | NA         | NA       | orange | 0.71823 |
| <i>FLJ25102</i> | NM_182626    | NA         | NA       | orange | 0.49231 |
| <i>FLJ30990</i> | NM_152517    | NA         | NA       | orange | 0.33122 |
| <i>FLJ32447</i> | NM_153038    | NA         | NA       | orange | 0.66789 |
| <i>FLJ41993</i> | NM_001001694 | NA         | NA       | orange | 0.22365 |

Supplementary Table 6

|                  |              |            |          |        |         |
|------------------|--------------|------------|----------|--------|---------|
| <i>FMO2</i>      | NM_001460    | rs13215678 | 1.92E-02 | orange | 0.43189 |
| <i>FOXH1</i>     | NM_003923    | rs5919734  | 2.02E-01 | orange | 0.41212 |
| <i>FXYP1</i>     | NM_021902    | rs1077330  | 6.46E-03 | orange | 0.13907 |
| <i>GAL3ST2</i>   | NM_022134    | rs4658413  | 1.11E-01 | orange | 0.24717 |
| <i>GIMAP6</i>    | NM_001007224 | NA         | NA       | orange | 0.16294 |
| <i>GNB5</i>      | NM_016194    | rs739431   | 8.66E-04 | orange | 0.08843 |
| <i>GP1BA</i>     | NM_000173    | rs1558250  | 5.83E-03 | orange | 0.75729 |
| <i>GPR116</i>    | NM_015234    | rs10747531 | 4.62E-03 | orange | 0.12275 |
| <i>GPR149</i>    | XM_293580    | NA         | NA       | orange | 0.28506 |
| <i>GPR50</i>     | NM_004224    | NA         | NA       | orange | 0.31637 |
| <i>GTDC1</i>     | NM_024659    | rs879740   | 4.60E-03 | orange | 0.36111 |
| <i>HCFC1R1</i>   | NM_001002018 | rs7225748  | 6.37E-04 | orange | 0.42687 |
| <i>HOXB1</i>     | NM_002144    | rs1979470  | 1.64E-02 | orange | 0.36491 |
| <i>IHPK3</i>     | NM_054111    | NA         | NA       | orange | 0.06034 |
| <i>JAK2</i>      | NM_004972    | rs6053063  | 3.84E-05 | orange | 0.43611 |
| <i>KCNH4</i>     | NM_012285    | rs12897189 | 1.00E-02 | orange | 0.08639 |
| <i>KCNK17</i>    | NM_031460    | rs4237674  | 4.20E-03 | orange | 0.17645 |
| <i>KDR</i>       | NM_002253    | rs159076   | 9.14E-04 | orange | 0.09877 |
| <i>KIAA1166</i>  | NM_018684    | NA         | NA       | orange | 0.16370 |
| <i>KLF8</i>      | NM_007250    | NA         | NA       | orange | 0.43413 |
| <i>KRTAP19-6</i> | NM_181612    | rs3817591  | 2.12E-03 | orange | 0.43528 |
| <i>KRTAP9-3</i>  | NM_031962    | rs2247995  | 3.98E-02 | orange | 0.09406 |
| <i>LOC146167</i> | NM_001080442 | NA         | NA       | orange | 0.10213 |
| <i>LOC201181</i> | NM_001013624 | NA         | NA       | orange | 0.15734 |
| <i>LOC285429</i> | NM_001029955 | NA         | NA       | orange | 0.28179 |
| <i>LOC642201</i> | XM_936358    | NA         | NA       | orange | 0.23732 |
| <i>LOC642316</i> | XM_925858    | NA         | NA       | orange | 0.56432 |
| <i>LOC644997</i> | NM_001045478 | NA         | NA       | orange | 0.14132 |
| <i>LRRN5</i>     | NM_006338    | NA         | NA       | orange | 0.42955 |
| <i>MAG</i>       | NM_002361    | rs7018220  | 1.86E-02 | orange | 0.07742 |
| <i>MASK</i>      | NM_016542    | NA         | NA       | orange | 0.60679 |
| <i>MGC35295</i>  | NM_152717    | NA         | NA       | orange | 0.23643 |
| <i>MGC50372</i>  | NM_173566    | NA         | NA       | orange | 0.14219 |
| <i>MTE</i>       | NM_175621    | NA         | NA       | orange | 0.46604 |
| <i>MYOCD</i>     | NM_153604    | rs1111059  | 2.46E-04 | orange | 0.31624 |
| <i>NAV2</i>      | NM_182964    | rs12590446 | 6.77E-04 | orange | 0.10320 |
| <i>NCOA2</i>     | NM_006540    | rs1351419  | 4.06E-04 | orange | 0.39195 |
| <i>NPL</i>       | NM_030769    | rs922029   | 1.69E-03 | orange | 0.07569 |
| <i>NXPH4</i>     | NM_007224    | rs6763408  | 4.33E-03 | orange | 0.19772 |
| <i>OLR1</i>      | NM_002543    | rs11249984 | 8.36E-04 | orange | 0.19194 |
| <i>OR2T27</i>    | NM_001001824 | NA         | NA       | orange | 0.72403 |
| <i>OR51Q1</i>    | NM_001004757 | rs11260657 | 7.51E-03 | orange | 0.16659 |
| <i>OR52B6</i>    | NM_001005162 | rs1386072  | 1.86E-03 | orange | 0.04123 |
| <i>PADI1</i>     | NM_013358    | rs7950189  | 1.77E-03 | orange | 0.49985 |
| <i>PARP3</i>     | NM_001003935 | NA         | NA       | orange | 0.31651 |
| <i>PCDHGB6</i>   | NM_032100    | rs988446   | 5.78E-02 | orange | 0.51687 |
| <i>PGLYRP4</i>   | NM_020393    | rs16829215 | 1.75E-02 | orange | 0.38649 |
| <i>PITX2</i>     | NM_000325    | rs12569425 | 2.71E-02 | orange | 0.23504 |
| <i>PLCB1</i>     | NM_182734    | rs962731   | 6.93E-04 | orange | 0.36261 |

Supplementary Table 6

|                  |                 |            |          |        |         |        |
|------------------|-----------------|------------|----------|--------|---------|--------|
| <i>PPP2R1B</i>   | NM_002716       | rs12705796 | 1.33E-03 | orange | 0.45597 |        |
| <i>PRAMEF5</i>   | NM_001013407    | NA         | NA       | orange | 0.73792 |        |
| <i>PRSS7</i>     | NM_002772       | NA         | NA       | orange | 1.00000 |        |
| <i>PSORS1C2</i>  | NM_014069       | rs3130559  | 9.51E-03 | orange | 0.24050 |        |
| <i>RFT1</i>      | NM_052859       | rs12910429 | 9.21E-03 | orange | 0.10554 |        |
| <i>RNASE10</i>   | NM_001012975    | rs16823043 | 1.12E-02 | orange | 0.37154 |        |
| <i>RNF149</i>    | NM_173647       | rs17284928 | 1.60E-02 | orange | 0.33184 |        |
| <i>RPS6KA6</i>   | NM_014496       | NA         | NA       | orange | 0.37565 |        |
| <i>RTN2</i>      | NM_005619       | rs1555185  | 7.56E-03 | orange | 0.42187 |        |
| <i>SERF1A</i>    | NM_021967       | NA         | NA       | orange | 0.36415 |        |
| <i>SHPRH</i>     | NM_173082       | rs7433333  | 1.25E-02 | orange | 0.55494 |        |
| <i>SLC26A2</i>   | NM_000112       | rs12691814 | 2.13E-02 | orange | 0.21719 |        |
| <i>SLC2A11</i>   | NM_030807       | rs5970839  | 8.87E-03 | orange | 0.21243 |        |
| <i>SLC9A4</i>    | NM_001011552    | rs5945770  | 1.06E-02 | orange | 0.12411 |        |
| <i>SLITRK4</i>   | NM_173078       | NA         | NA       | orange | 0.16917 |        |
| <i>SP6</i>       | NM_199262       | rs12614953 | 4.97E-03 | orange | 0.43456 |        |
| <i>SPAG11A</i>   | NM_001081552    | rs12210175 | 1.81E-03 | orange | 0.21142 |        |
| <i>SRPK2</i>     | NM_182691       | rs3866247  | 4.42E-03 | orange | 0.31990 |        |
| <i>STAG3</i>     | NM_012447       | rs1944191  | 2.63E-02 | orange | 0.49404 |        |
| <i>SUV39H2</i>   | NM_024670       | rs2191116  | 1.63E-02 | orange | 0.13845 |        |
| <i>TAB3</i>      | NM_198312       | NA         | NA       | orange | 0.17380 |        |
| <i>TAS2R38</i>   | NM_176817       | rs2882429  | 6.07E-02 | orange | 0.37681 |        |
| <i>TCL6</i>      | NM_012468       | NA         | NA       | orange | 0.55595 |        |
| <i>THADA</i>     | NM_022065       | rs2838281  | 5.13E-04 | orange | 0.15749 |        |
| <i>THOC2</i>     | NM_020449       | NA         | NA       | orange | 0.58113 |        |
| <i>TIE1</i>      | NM_005424       | rs9533761  | 1.46E-03 | orange | 0.14217 |        |
| <i>TNFRSF10C</i> | NM_003841       | rs4655127  | 4.36E-03 | orange | 0.01743 |        |
| <i>TRAPPC6B</i>  | NM_177452       | rs1319449  | 1.52E-03 | orange | 0.41671 |        |
| <i>TSPAN12</i>   | NM_012338       | rs4659246  | 7.91E-03 | orange | 0.29793 |        |
| <i>TTC7B</i>     | NM_001010854    | rs2813760  | 1.44E-03 | orange | 0.39571 |        |
| <i>USP26</i>     | NM_031907       | NA         | NA       | orange | 0.51597 |        |
| <i>USP54</i>     | NM_152586       | rs4256646  | 4.24E-03 | orange | 0.30578 |        |
| <i>WIRE</i>      | NM_133264       | NA         | NA       | orange | 0.34609 |        |
| <i>XCR1</i>      | NM_001024644    | rs4768153  | 6.56E-03 | orange | 0.21991 |        |
| <i>ZNF383</i>    | NM_152604       | rs328142   | 4.80E-03 | orange | 0.46806 |        |
| <i>ZNF460</i>    | NM_006635       | rs322567   | 2.37E-02 | orange | 0.05803 |        |
| <i>ZXDA</i>      | NM_007156       | NA         | NA       | orange | 0.48884 |        |
|                  | 4-Sep NM_019106 | NA         | NA       | pink   | 0.89425 |        |
| <i>ABAT</i>      | NM_000663       | rs4959501  | 5.04E-03 | pink   | 0.58907 | autism |
| <i>ABCA4</i>     | NM_000350       | rs203132   | 1.89E-03 | pink   | 0.10150 |        |
| <i>ABCA7</i>     | NM_019112       | rs748651   | 1.95E-02 | pink   | 0.19885 |        |
| <i>ABCC5</i>     | NM_001023587    | rs12493550 | 6.96E-02 | pink   | 0.77186 |        |
| <i>ABCC8</i>     | NM_000352       | rs7950189  | 1.77E-03 | pink   | 0.14459 |        |
| <i>ABCC9</i>     | NM_020297       | rs6452027  | 7.50E-04 | pink   | 0.65456 |        |
| <i>ABCC9</i>     | NM_020298       | rs6452027  | 7.50E-04 | pink   | 0.41065 |        |
| <i>ABCE1</i>     | NM_002940       | rs471172   | 9.45E-02 | pink   | 0.55677 |        |
| <i>ABHD1</i>     | NM_152870       | NA         | NA       | pink   | 0.24940 |        |
| <i>ABHD11</i>    | NM_148916       | NA         | NA       | pink   | 0.77697 |        |
| <i>ABI1</i>      | NM_005470       | rs9554090  | 6.33E-03 | pink   | 0.10411 |        |

Supplementary Table 6

|                 |              |            |          |      |         |        |
|-----------------|--------------|------------|----------|------|---------|--------|
| <i>ABL2</i>     | NM_005158    | rs11731185 | 7.56E-03 | pink | 0.36479 |        |
| <i>ABLIM2</i>   | NM_032432    | rs962731   | 6.93E-04 | pink | 0.48775 |        |
| <i>ACCN1</i>    | NM_183377    | rs2831462  | 8.61E-05 | pink | 1.00000 |        |
| <i>ACCN4</i>    | NM_018674    | rs4846355  | 1.02E-01 | pink | 0.07206 |        |
| <i>ACOT7</i>    | NM_181866    | rs2117784  | 5.92E-04 | pink | 0.03377 |        |
| <i>ACOX1</i>    | NM_004035    | rs7174643  | 9.97E-04 | pink | 0.08221 |        |
| <i>ACP6</i>     | NM_016361    | rs993701   | 2.57E-02 | pink | 0.38904 |        |
| <i>ACVR1B</i>   | NM_004302    | rs6097043  | 9.55E-04 | pink | 0.76818 |        |
| <i>ADAMTS10</i> | NM_030957    | rs1876611  | 4.93E-03 | pink | 0.01559 |        |
| <i>ADAMTS3</i>  | NM_014243    | rs10879852 | 1.42E-03 | pink | 0.16294 |        |
| <i>ADAMTS6</i>  | NM_197941    | rs7188225  | 1.11E-03 | pink | 0.24649 |        |
| <i>ADAMTS7</i>  | NM_014272    | rs17105732 | 1.86E-03 | pink | 0.29740 |        |
| <i>ADCY9</i>    | NM_001116    | rs13338087 | 2.44E-03 | pink | 0.10754 |        |
| <i>ADD3</i>     | NM_016824    | rs458017   | 7.21E-03 | pink | 0.70071 |        |
| <i>ADD3</i>     | NM_016824    | rs458017   | 7.21E-03 | pink | 0.33871 |        |
| <i>ADD3</i>     | NM_019903    | rs458017   | 7.21E-03 | pink | 0.14475 |        |
| <i>ADHFE1</i>   | NM_144650    | rs12327356 | 2.22E-03 | pink | 0.82171 |        |
| <i>ADHFE1</i>   | NM_001077593 | NA         | NA       | pink | 0.80083 |        |
| <i>ADRA1A</i>   | NM_033302    | rs2992299  | 1.29E-03 | pink | 0.13428 |        |
| <i>AHCTF1</i>   | XM_942402    | NA         | NA       | pink | 0.17001 |        |
| <i>AHI1</i>     | NM_017651    | rs4579471  | 3.57E-03 | pink | 0.41230 | autism |
| <i>AKNA</i>     | NM_030767    | rs2682826  | 5.89E-03 | pink | 0.40316 |        |
| <i>AKT1S1</i>   | NM_032375    | rs4811794  | 7.05E-02 | pink | 0.03211 |        |
| <i>ALDH1A1</i>  | NM_000689    | rs1374879  | 1.14E-02 | pink | 0.17167 |        |
| <i>ALDH1B1</i>  | NM_000692    | rs2092179  | 1.37E-02 | pink | 0.12683 |        |
| <i>ALDH4A1</i>  | NM_003748    | rs7897030  | 1.38E-02 | pink | 0.19634 |        |
| <i>ALDH6A1</i>  | NM_005589    | rs7614618  | 1.17E-02 | pink | 0.23216 |        |
| <i>ALG8</i>     | NM_001007027 | rs6767250  | 1.53E-02 | pink | 0.82655 |        |
| <i>ALPK1</i>    | NM_025144    | rs11259844 | 3.54E-04 | pink | 0.11164 |        |
| <i>ALS2CR15</i> | NM_138468    | rs934287   | 4.39E-02 | pink | 0.82284 |        |
| <i>ALS2CR16</i> | NM_205543    | NA         | NA       | pink | 0.60299 |        |
| <i>AMMECR1</i>  | NM_015365    | NA         | NA       | pink | 0.22891 |        |
| <i>AMT</i>      | NM_000481    | rs10484961 | 2.42E-03 | pink | 0.27190 |        |
| <i>ANAPC1</i>   | NM_022662    | rs7124625  | 1.00E-02 | pink | 0.35579 |        |
| <i>ANGEL1</i>   | NM_015305    | rs308927   | 6.64E-03 | pink | 0.37227 |        |
| <i>ANK1</i>     | NM_020480    | rs16871561 | 1.30E-03 | pink | 0.30267 |        |
| <i>ANKFN1</i>   | NM_153228    | rs1028145  | 8.24E-05 | pink | 0.08484 |        |
| <i>ANKRD15</i>  | NM_153186    | NA         | NA       | pink | 0.41806 |        |
| <i>ANKRD16</i>  | NM_019046    | rs10775385 | 4.14E-03 | pink | 0.22706 |        |
| <i>ANKRD32</i>  | NM_032290    | rs11107875 | 1.71E-02 | pink | 0.09748 |        |
| <i>ANKRD41</i>  | NM_152363    | NA         | NA       | pink | 0.13534 |        |
| <i>ANKRD6</i>   | NM_014942    | rs2813760  | 1.44E-03 | pink | 0.83041 |        |
| <i>ANTXR1</i>   | NM_053034    | rs11814376 | 4.27E-04 | pink | 0.38249 |        |
| <i>ANXA2P1</i>  | NR_001562    | rs9288286  | 4.68E-03 | pink | 0.32456 |        |
| <i>AOX1</i>     | NM_001159    | rs2465661  | 4.35E-02 | pink | 0.13037 |        |
| <i>AP2A2</i>    | NM_012305    | rs4816153  | 1.13E-02 | pink | 0.60694 |        |
| <i>APOL2</i>    | NM_145637    | rs763086   | 3.82E-02 | pink | 0.11246 |        |
| <i>APPBP1</i>   | NM_001018159 | NA         | NA       | pink | 0.01864 |        |
| <i>AQP1</i>     | NM_198098    | rs1702403  | 7.29E-03 | pink | 0.54806 |        |

Supplementary Table 6

|                  |              |            |          |      |         |        |
|------------------|--------------|------------|----------|------|---------|--------|
| <i>AQP4</i>      | NM_001650    | rs10485011 | 1.02E-02 | pink | 0.75737 |        |
| <i>ARFGEF2</i>   | NM_006420    | rs2258342  | 5.25E-03 | pink | 0.33352 |        |
| <i>ARHGAP10</i>  | NM_024605    | rs1478366  | 1.51E-03 | pink | 0.27348 |        |
| <i>ARHGAP11A</i> | NM_014783    | rs1002149  | 8.57E-03 | pink | 0.26994 |        |
| <i>ARHGEF4</i>   | NM_032995    | rs12270361 | 6.82E-03 | pink | 0.24088 |        |
| <i>ARMC4</i>     | NM_018076    | rs2614048  | 1.98E-03 | pink | 0.03822 |        |
| <i>ARPM1</i>     | NM_032487    | rs6736609  | 2.85E-02 | pink | 0.02009 |        |
| <i>ARSI</i>      | NM_001012301 | rs2170606  | 2.96E-04 | pink | 0.35559 |        |
| <i>ASAM</i>      | NM_024769    | rs13272291 | 1.40E-02 | pink | 0.45683 |        |
| <i>ASB6</i>      | NM_177999    | rs3780695  | 1.95E-02 | pink | 0.17197 |        |
| <i>ASGR1</i>     | NM_001671    | rs7857570  | 5.91E-03 | pink | 0.43284 |        |
| <i>ASH1L</i>     | NM_018489    | rs10011174 | 3.13E-03 | pink | 0.04775 |        |
| <i>ASPH</i>      | NM_020164    | rs1467422  | 6.27E-04 | pink | 0.21377 |        |
| <i>ASRGL1</i>    | NM_025080    | rs17828306 | 1.22E-03 | pink | 0.42250 |        |
| <i>ASS</i>       | NM_000050    | rs1605327  | 2.31E-02 | pink | 0.40001 | autism |
| <i>ASTN</i>      | NM_207108    | NA         | NA       | pink | 0.19909 |        |
| <i>ASTN2</i>     | NM_198187    | rs3802881  | 9.06E-03 | pink | 0.66289 | autism |
| <i>ATP13A2</i>   | NM_022089    | rs2285274  | 7.55E-04 | pink | 0.58324 |        |
| <i>ATP1B1</i>    | NM_001001787 | NA         | NA       | pink | 0.46441 |        |
| <i>ATP2B1</i>    | NM_001001323 | rs6759954  | 5.34E-03 | pink | 0.26926 |        |
| <i>ATP2B2</i>    | NM_001683    | rs10946418 | 2.38E-03 | pink | 0.40926 |        |
| <i>AXIIR</i>     | NM_001014279 | NA         | NA       | pink | 0.53417 |        |
| <i>B3GALT2</i>   | NM_003783    | rs2355575  | 1.19E-01 | pink | 0.09828 |        |
| <i>B3GTL</i>     | NM_194318    | NA         | NA       | pink | 0.65319 |        |
| <i>BACE2</i>     | NM_012105    | rs12584909 | 3.64E-04 | pink | 0.63086 |        |
| <i>BACE2</i>     | NM_138991    | rs12584909 | 3.64E-04 | pink | 0.54786 |        |
| <i>BAX</i>       | NM_004324    | rs12606138 | 6.48E-04 | pink | 0.15431 |        |
| <i>BBS9</i>      | NM_198428    | rs10954906 | 1.42E-03 | pink | 0.03434 |        |
| <i>BCAS3</i>     | NM_017679    | rs860324   | 8.88E-04 | pink | 0.13381 |        |
| <i>BDNF</i>      | NM_001709    | rs7171078  | 2.53E-02 | pink | 0.28961 |        |
| <i>BDNF</i>      | NM_170733    | rs7171078  | 2.53E-02 | pink | 0.08377 |        |
| <i>BIRC5</i>     | NM_001012271 | rs2407044  | 2.45E-02 | pink | 0.76215 |        |
| <i>BMF</i>       | NM_001003943 | rs12194275 | 3.66E-03 | pink | 0.09304 |        |
| <i>BMP6</i>      | NM_001718    | rs12210175 | 1.81E-03 | pink | 0.27662 |        |
| <i>BNIP3L</i>    | NM_004331    | rs16930371 | 8.98E-03 | pink | 0.20538 |        |
| <i>BOLA2</i>     | NM_001031827 | NA         | NA       | pink | 0.80058 |        |
| <i>BOLA2</i>     | NM_001031827 | NA         | NA       | pink | 0.13731 |        |
| <i>BRCA1</i>     | NM_007301    | NA         | NA       | pink | 0.41408 |        |
| <i>BRCA1</i>     | NM_007304    | NA         | NA       | pink | 0.42898 |        |
| <i>BRMS1</i>     | NM_015399    | rs4883777  | 4.45E-02 | pink | 0.41049 |        |
| <i>BRRN1</i>     | NM_015341    | NA         | NA       | pink | 0.03103 |        |
| <i>BRSK1</i>     | NM_032430    | rs13064050 | 5.02E-03 | pink | 0.87160 |        |
| <i>BTBD7</i>     | NM_018167    | rs2147155  | 1.17E-02 | pink | 0.36371 |        |
| <i>BTN3A2</i>    | NM_007047    | rs7337170  | 1.54E-03 | pink | 0.50074 |        |
| <i>BTN3A3</i>    | NM_197974    | rs12031946 | 6.41E-04 | pink | 0.95309 |        |
| <i>BUB1</i>      | NM_004336    | rs12705796 | 1.33E-03 | pink | 0.77826 |        |
| <i>C10orf119</i> | NM_024834    | rs2809898  | 5.07E-03 | pink | 0.39239 |        |
| <i>C10orf85</i>  | NM_001012711 | NA         | NA       | pink | 0.42771 |        |
| <i>C10orf93</i>  | XM_945168    | NA         | NA       | pink | 0.41953 |        |

Supplementary Table 6

|                  |              |            |          |      |         |          |
|------------------|--------------|------------|----------|------|---------|----------|
| <i>C14orf121</i> | NM_138360    | NA         | NA       | pink | 0.19489 |          |
| <i>C14orf28</i>  | NM_001017923 | rs11082688 | 1.18E-02 | pink | 0.50843 |          |
| <i>C14orf58</i>  | NM_017791    | NA         | NA       | pink | 0.35355 |          |
| <i>C14orf80</i>  | NM_173608    | NA         | NA       | pink | 0.77023 |          |
| <i>C17orf28</i>  | NM_030630    | rs1544442  | 1.08E-03 | pink | 0.41549 |          |
| <i>C17orf75</i>  | NM_022344    | rs12555932 | 1.89E-02 | pink | 0.53447 |          |
| <i>C17orf81</i>  | NM_203414    | rs4689064  | 7.01E-03 | pink | 0.05377 |          |
| <i>C18orf54</i>  | NM_173529    | rs6504930  | 6.94E-03 | pink | 0.23297 |          |
| <i>C19orf18</i>  | NM_152474    | rs2780882  | 1.85E-02 | pink | 0.31206 |          |
| <i>C19orf28</i>  | NM_174983    | rs7883545  | 2.53E-04 | pink | 0.64210 |          |
| <i>C19orf36</i>  | NM_001031735 | NA         | NA       | pink | 0.45352 |          |
| <i>C1orf107</i>  | NM_014388    | rs981901   | 1.47E-01 | pink | 0.53750 |          |
| <i>C1orf110</i>  | NM_178550    | rs9872563  | 3.52E-03 | pink | 0.31865 |          |
| <i>C1orf159</i>  | NM_017891    | rs789029   | 4.51E-03 | pink | 0.31219 |          |
| <i>C1orf162</i>  | NM_174896    | rs458017   | 7.21E-03 | pink | 0.14706 |          |
| <i>C1orf33</i>   | NM_016183    | NA         | NA       | pink | 0.85913 |          |
| <i>C1orf53</i>   | NM_001024594 | rs10200021 | 1.34E-01 | pink | 0.30544 |          |
| <i>C1orf96</i>   | NM_145257    | rs237807   | 2.36E-02 | pink | 0.48802 |          |
| <i>C20orf172</i> | NM_024918    | NA         | NA       | pink | 0.73127 |          |
| <i>C20orf26</i>  | NM_015585    | rs675465   | 4.63E-04 | pink | 0.65722 |          |
| <i>C20orf67</i>  | NM_022104    | NA         | NA       | pink | 0.13952 |          |
| <i>C21orf2</i>   | NM_004928    | rs6932104  | 1.35E-02 | pink | 0.65677 |          |
| <i>C21orf58</i>  | NM_199071    | NA         | NA       | pink | 0.36199 |          |
| <i>C21orf70</i>  | NM_058190    | rs2102797  | 3.40E-03 | pink | 0.65970 |          |
| <i>C3orf52</i>   | NM_024616    | rs11195623 | 1.06E-03 | pink | 0.32744 |          |
| <i>C6orf111</i>  | NM_032870    | NA         | NA       | pink | 0.28719 |          |
| <i>C6orf134</i>  | NM_001031722 | NA         | NA       | pink | 0.13261 |          |
| <i>C6orf167</i>  | NM_198468    | NA         | NA       | pink | 0.30244 |          |
| <i>C6orf173</i>  | NM_001012507 | NA         | NA       | pink | 0.74065 |          |
| <i>C6orf66</i>   | NM_014165    | NA         | NA       | pink | 0.19494 |          |
| <i>C8orf44</i>   | NM_019607    | rs1541864  | 1.79E-03 | pink | 0.28777 |          |
| <i>C8ORFK32</i>  | NM_015912    | NA         | NA       | pink | 0.30351 |          |
| <i>C9orf100</i>  | NM_001031728 | NA         | NA       | pink | 0.03595 |          |
| <i>C9orf103</i>  | NM_001001551 | rs195045   | 8.54E-03 | pink | 0.32394 |          |
| <i>C9orf111</i>  | NM_152286    | NA         | NA       | pink | 0.35109 |          |
| <i>C9orf18</i>   | NM_198469    | NA         | NA       | pink | 0.46464 |          |
| <i>C9orf23</i>   | NM_148178    | rs13356779 | 8.15E-04 | pink | 0.12305 |          |
| <i>C9orf61</i>   | NM_004816    | NA         | NA       | pink | 0.48343 |          |
| <i>C9orf72</i>   | NM_145005    | rs10501086 | 2.08E-02 | pink | 0.55950 |          |
| <i>CA10</i>      | NM_020178    | rs4794301  | 9.80E-04 | pink | 0.02687 |          |
| <i>CAB39L</i>    | NM_001031724 | NA         | NA       | pink | 0.04475 |          |
| <i>CACNA1E</i>   | NM_000721    | rs1477779  | 1.16E-03 | pink | 0.49482 |          |
| <i>CACNA2D2</i>  | NM_001005505 | rs913465   | 3.20E-03 | pink | 0.05688 | epilepsy |
| <i>CACNG6</i>    | NM_031897    | rs282716   | 4.73E-03 | pink | 0.14161 |          |
| <i>CAD</i>       | NM_004341    | rs1555453  | 3.00E-03 | pink | 0.08407 |          |
| <i>CADPS</i>     | NM_183394    | rs7084300  | 1.44E-04 | pink | 0.27942 |          |
| <i>CALU</i>      | NM_001219    | rs6951397  | 1.30E-03 | pink | 0.80588 |          |
| <i>CAMK1D</i>    | NM_020397    | rs10511576 | 6.01E-05 | pink | 0.08282 |          |
| <i>CAMK1G</i>    | NM_020439    | rs716630   | 2.16E-02 | pink | 0.24996 |          |



Supplementary Table 6

|                 |              |            |          |      |         |        |
|-----------------|--------------|------------|----------|------|---------|--------|
| <i>CAMK2D</i>   | NM_001221    | rs987694   | 1.13E-03 | pink | 0.53236 |        |
| <i>CAPN3</i>    | NM_000070    | rs6072705  | 3.47E-03 | pink | 0.05234 |        |
| <i>CARS</i>     | NM_001751    | rs7225748  | 6.37E-04 | pink | 0.18016 |        |
| <i>CASC4</i>    | NM_138423    | rs328170   | 4.79E-03 | pink | 0.17647 | autism |
| <i>CASC5</i>    | NM_170589    | rs1319449  | 1.52E-03 | pink | 0.36268 |        |
| <i>CASP3</i>    | NM_004346    | rs11683056 | 5.15E-02 | pink | 0.37575 |        |
| <i>CASZ1</i>    | NM_001079843 | rs17152650 | 7.81E-04 | pink | 0.50757 |        |
| <i>CBLN2</i>    | NM_182511    | rs10957384 | 1.79E-03 | pink | 0.62220 |        |
| <i>CBR3</i>     | NM_001236    | rs10836560 | 1.56E-02 | pink | 0.94713 |        |
| <i>CBX4</i>     | NM_003655    | rs16938888 | 1.30E-02 | pink | 0.58444 |        |
| <i>CBX7</i>     | NM_175709    | rs744713   | 6.45E-03 | pink | 0.88827 |        |
| <i>CCDC46</i>   | NM_145036    | rs6011530  | 1.02E-03 | pink | 0.18645 |        |
| <i>CCPG1</i>    | NM_020739    | rs17832328 | 4.52E-03 | pink | 0.73388 |        |
| <i>CD1D</i>     | NM_001766    | rs2969123  | 1.80E-03 | pink | 0.05143 |        |
| <i>CD276</i>    | NM_001024736 | rs3015906  | 8.88E-03 | pink | 0.68329 |        |
| <i>CD3EAP</i>   | NM_012099    | rs4479142  | 6.00E-03 | pink | 0.08210 |        |
| <i>CD5</i>      | NM_014207    | rs7071102  | 6.66E-03 | pink | 0.22513 |        |
| <i>CD59</i>     | NM_203331    | rs8093306  | 4.11E-03 | pink | 0.06566 |        |
| <i>CD83</i>     | NM_004233    | rs4316797  | 4.18E-03 | pink | 0.90807 |        |
| <i>CD97</i>     | NM_001784    | rs13081924 | 1.52E-02 | pink | 0.07670 |        |
| <i>CDADC1</i>   | NM_030911    | rs8088528  | 7.71E-03 | pink | 0.06289 |        |
| <i>CDC42EP2</i> | NM_006779    | rs10132229 | 9.16E-03 | pink | 0.20306 |        |
| <i>CDCA3</i>    | NM_031299    | rs905965   | 5.90E-03 | pink | 0.72449 |        |
| <i>CDCA4</i>    | NM_145701    | rs3924892  | 1.64E-02 | pink | 0.22070 |        |
| <i>CDCP1</i>    | NM_022842    | rs2868858  | 4.68E-03 | pink | 0.12567 |        |
| <i>CDH3</i>     | NM_001793    | rs4542295  | 5.39E-03 | pink | 0.28106 |        |
| <i>CDK5R1</i>   | NM_003885    | rs9647128  | 1.12E-02 | pink | 0.61212 |        |
| <i>CDKL2</i>    | NM_003948    | rs1176811  | 1.63E-03 | pink | 0.60835 |        |
| <i>CDO1</i>     | NM_001801    | rs12408865 | 2.31E-02 | pink | 0.82336 |        |
| <i>CDON</i>     | NM_016952    | rs5930945  | 8.82E-04 | pink | 0.13176 |        |
| <i>CDS1</i>     | NM_001263    | rs7841984  | 8.94E-03 | pink | 0.49961 |        |
| <i>CECR1</i>    | NM_017424    | rs1378164  | 2.40E-02 | pink | 0.14895 |        |
| <i>CELSR3</i>   | NM_001407    | rs752870   | 3.68E-02 | pink | 0.57584 |        |
| <i>CENPO</i>    | NM_024322    | rs10248878 | 6.66E-03 | pink | 0.59467 |        |
| <i>CEP152</i>   | NM_014985    | rs1077216  | 1.10E-03 | pink | 0.19817 |        |
| <i>CEP170</i>   | NM_001042404 | rs3936203  | 2.91E-01 | pink | 0.23977 |        |
| <i>CEP72</i>    | NM_018140    | rs12222447 | 3.62E-03 | pink | 0.28333 |        |
| <i>CES1</i>     | NM_001025195 | rs17117895 | 8.40E-04 | pink | 0.15878 |        |
| <i>CFB</i>      | NM_001710    | rs10059023 | 1.81E-03 | pink | 0.71101 |        |
| <i>CG018</i>    | NM_001079691 | NA         | NA       | pink | 0.32240 |        |
| <i>CG018</i>    | NM_052818    | NA         | NA       | pink | 0.51702 |        |
| <i>CGI-38</i>   | NM_015964    | NA         | NA       | pink | 0.85473 |        |
| <i>CGREF1</i>   | NM_006569    | rs467691   | 8.77E-03 | pink | 0.06322 |        |
| <i>CHAC2</i>    | NM_001008708 | rs4624872  | 4.96E-02 | pink | 0.34620 |        |
| <i>CHAF1A</i>   | NM_005483    | rs11252477 | 1.10E-02 | pink | 0.66261 |        |
| <i>CHAF1B</i>   | NM_005441    | rs1538634  | 1.01E-02 | pink | 0.78771 |        |
| <i>CHCHD7</i>   | NM_001011670 | rs10783915 | 5.19E-04 | pink | 0.28904 |        |
| <i>CHCHD8</i>   | NM_016565    | rs11220    | 7.35E-03 | pink | 0.45415 |        |
| <i>CHD1</i>     | NM_001270    | rs4905752  | 8.91E-04 | pink | 0.40921 |        |

Supplementary Table 6

|                  |              |            |          |      |         |        |
|------------------|--------------|------------|----------|------|---------|--------|
| <i>CHD5</i>      | NM_015557    | rs6500756  | 1.34E-03 | pink | 0.53951 |        |
| <i>CHRM1</i>     | NM_000738    | rs6858066  | 7.16E-03 | pink | 0.20012 |        |
| <i>CHRNA1</i>    | NM_000079    | rs1028304  | 7.65E-02 | pink | 0.72412 |        |
| <i>CHST2</i>     | NM_004267    | rs1476736  | 4.14E-02 | pink | 0.07989 |        |
| <i>CHTF18</i>    | NM_022092    | rs571870   | 3.70E-02 | pink | 0.23464 |        |
| <i>CKS1B</i>     | NM_001826    | rs2239466  | 2.27E-03 | pink | 0.55350 |        |
| <i>CKS2</i>      | NM_001827    | rs11137559 | 4.74E-05 | pink | 0.36331 |        |
| <i>CLASP2</i>    | NM_015097    | rs729424   | 3.22E-03 | pink | 0.81149 |        |
| <i>CLDN3</i>     | NM_001306    | rs1561104  | 1.71E-03 | pink | 0.12186 |        |
| <i>CLGN</i>      | NM_004362    | rs2961693  | 9.90E-03 | pink | 0.21798 |        |
| <i>CLN6</i>      | NM_017882    | rs7767963  | 1.88E-03 | pink | 0.12858 |        |
| <i>CLSTN3</i>    | NM_014718    | rs4689606  | 1.68E-04 | pink | 0.19571 |        |
| <i>CMTM4</i>     | NM_178818    | rs1471504  | 4.02E-03 | pink | 0.08363 |        |
| <i>CNFN</i>      | NM_032488    | rs1410117  | 3.98E-03 | pink | 0.15361 |        |
| <i>CNGA3</i>     | NM_001298    | rs12789711 | 7.81E-03 | pink | 0.08767 |        |
| <i>CNTFR</i>     | NM_001842    | rs558317   | 2.00E-04 | pink | 0.21190 |        |
| <i>CNTN2</i>     | NM_005076    | rs9787334  | 5.66E-02 | pink | 0.65542 |        |
| <i>COL11A1</i>   | NM_080629    | rs7543626  | 3.26E-04 | pink | 0.73109 |        |
| <i>COL11A2</i>   | NM_080681    | rs4427132  | 6.01E-03 | pink | 0.03726 |        |
| <i>COL8A1</i>    | NM_001850    | rs17611664 | 2.65E-03 | pink | 0.61207 |        |
| <i>COL8A1</i>    | NM_020351    | rs17611664 | 2.65E-03 | pink | 0.59043 |        |
| <i>COL9A1</i>    | NM_001851    | rs212165   | 2.00E-03 | pink | 0.65680 |        |
| <i>COLQ</i>      | NM_080539    | rs11203713 | 2.98E-04 | pink | 0.57964 |        |
| <i>COTL1</i>     | NM_021149    | rs4662179  | 9.26E-03 | pink | 0.68973 |        |
| <i>CRKRS</i>     | NM_016507    | NA         | NA       | pink | 0.15301 |        |
| <i>CRLF3</i>     | NM_015986    | rs7721783  | 9.63E-03 | pink | 0.36218 |        |
| <i>CROP</i>      | NM_016424    | NA         | NA       | pink | 0.20291 |        |
| <i>CTHRC1</i>    | NM_138455    | rs9300981  | 1.36E-02 | pink | 0.05881 |        |
| <i>CTPS2</i>     | NM_019857    | NA         | NA       | pink | 0.07579 |        |
| <i>CTSC</i>      | NM_148170    | rs645063   | 4.75E-03 | pink | 0.05445 |        |
| <i>CTSK</i>      | NM_000396    | rs1478366  | 1.51E-03 | pink | 0.36659 |        |
| <i>CTSO</i>      | NM_001334    | rs9307938  | 3.87E-06 | pink | 0.47441 |        |
| <i>CUTL2</i>     | NM_015267    | NA         | NA       | pink | 0.16509 |        |
| <i>CYP2E1</i>    | NM_000773    | rs10164986 | 2.31E-02 | pink | 0.15952 |        |
| <i>CYP2U1</i>    | NM_183075    | rs10499980 | 1.67E-02 | pink | 0.56463 |        |
| <i>CYYR1</i>     | NM_052954    | rs2830244  | 1.41E-03 | pink | 0.39909 |        |
| <i>D15Wsu75e</i> | NM_015704    | NA         | NA       | pink | 0.68105 |        |
| <i>DAB2IP</i>    | NM_032552    | rs4296799  | 3.73E-03 | pink | 0.14694 |        |
| <i>DCDC2</i>     | NM_016356    | rs9553499  | 2.13E-03 | pink | 0.59861 |        |
| <i>DDX11</i>     | NM_030653    | rs221981   | 5.47E-03 | pink | 0.61265 | autism |
| <i>DDX20</i>     | NM_007204    | rs197414   | 7.12E-03 | pink | 0.09177 |        |
| <i>DEK</i>       | NM_003472    | rs7788359  | 5.73E-03 | pink | 0.18195 |        |
| <i>DENND1A</i>   | NM_024820    | rs314946   | 7.77E-05 | pink | 0.81300 |        |
| <i>DEPDC1B</i>   | NM_018369    | rs2726555  | 1.51E-03 | pink | 0.44156 |        |
| <i>DEPDC4</i>    | NM_152317    | rs1441383  | 3.46E-03 | pink | 0.03718 |        |
| <i>DERL3</i>     | NM_001002862 | rs11886927 | 4.97E-02 | pink | 0.03822 |        |
| <i>DFNB31</i>    | NM_015404    | rs6908592  | 2.62E-03 | pink | 0.60576 |        |
| <i>DGCR13</i>    | NM_001024733 | NA         | NA       | pink | 0.77126 |        |
| <i>DGKA</i>      | NM_201554    | rs11003452 | 1.17E-02 | pink | 0.07001 |        |

Supplementary Table 6

|               |              |            |          |      |         |        |
|---------------|--------------|------------|----------|------|---------|--------|
| <i>DGKB</i>   | NM_004080    | rs727668   | 1.24E-03 | pink | 0.83832 |        |
| <i>DGKD</i>   | NM_152879    | rs838709   | 1.46E-02 | pink | 0.21104 |        |
| <i>DGKI</i>   | NM_004717    | rs1571332  | 1.28E-03 | pink | 0.43269 |        |
| <i>DHODH</i>  | NM_001361    | rs2919744  | 1.14E-02 | pink | 0.62254 |        |
| <i>DHODH</i>  | NM_001025193 | NA         | NA       | pink | 0.30176 |        |
| <i>DHRS10</i> | NM_016246    | NA         | NA       | pink | 0.03719 |        |
| <i>DIP2A</i>  | NM_206889    | rs17118127 | 4.87E-03 | pink | 0.07064 |        |
| <i>DIP2A</i>  | NM_206890    | rs17118127 | 4.87E-03 | pink | 0.54109 |        |
| <i>DIPA</i>   | NM_006848    | NA         | NA       | pink | 0.20894 |        |
| <i>DIRAS2</i> | NM_017594    | rs16918472 | 6.91E-03 | pink | 0.79738 |        |
| <i>DMN</i>    | NM_145728    | NA         | NA       | pink | 0.25362 |        |
| <i>DMXL2</i>  | NM_015263    | rs7755833  | 2.55E-04 | pink | 0.21072 |        |
| <i>DNA2L</i>  | XM_938629    | NA         | NA       | pink | 0.44303 |        |
| <i>DNAH7</i>  | NM_018897    | rs12136149 | 6.38E-03 | pink | 0.32831 |        |
| <i>DNAI1</i>  | NM_012144    | rs11156868 | 2.26E-03 | pink | 0.19103 |        |
| <i>DNER</i>   | NM_139072    | rs7551537  | 1.12E-03 | pink | 0.98859 |        |
| <i>DNM1</i>   | NM_004408    | rs9853945  | 1.21E-03 | pink | 0.06962 |        |
| <i>DNM1L</i>  | NM_005690    | rs1958023  | 1.42E-03 | pink | 0.14340 |        |
| <i>DNMT3B</i> | NM_006892    | rs12915554 | 1.15E-03 | pink | 0.21128 |        |
| <i>DOCK3</i>  | NM_004947    | rs17504439 | 7.67E-04 | pink | 0.15147 |        |
| <i>DOCK5</i>  | NM_024940    | rs859202   | 5.28E-04 | pink | 0.52268 |        |
| <i>DPH2</i>   | NM_001384    | rs7326252  | 1.49E-04 | pink | 0.28470 |        |
| <i>DPH2</i>   | NM_001384    | rs7326252  | 1.49E-04 | pink | 0.28647 |        |
| <i>DPP10</i>  | NM_001004360 | rs2254527  | 4.43E-04 | pink | 0.25821 | autism |
| <i>DRD4</i>   | NM_000797    | rs13381806 | 8.14E-03 | pink | 0.36013 |        |
| <i>DYRK3</i>  | NM_003582    | rs13390018 | 1.40E-01 | pink | 0.20356 |        |
| <i>E2F8</i>   | NM_024680    | rs1193329  | 2.36E-03 | pink | 0.47552 |        |
| <i>ECD</i>    | NM_007265    | rs7087762  | 8.13E-03 | pink | 0.64210 |        |
| <i>ECE2</i>   | NM_014693    | rs17139    | 9.80E-03 | pink | 0.05802 |        |
| <i>EDG4</i>   | NM_004720    | NA         | NA       | pink | 0.48603 |        |
| <i>EFS</i>    | NM_005864    | rs940013   | 3.25E-03 | pink | 0.51162 |        |
| <i>EGF</i>    | NM_001963    | rs12705796 | 1.33E-03 | pink | 0.16057 |        |
| <i>EIF2C4</i> | NM_017629    | rs17203014 | 2.17E-04 | pink | 0.28532 |        |
| <i>EIF4G1</i> | NM_004953    | rs11733679 | 3.32E-02 | pink | 0.41692 |        |
| <i>ELF2</i>   | NM_201999    | rs6577995  | 5.22E-03 | pink | 0.61105 |        |
| <i>ELF3</i>   | NM_004433    | rs10737576 | 7.13E-02 | pink | 0.15720 |        |
| <i>ELOVL1</i> | NM_022821    | rs2838281  | 5.13E-04 | pink | 0.68754 |        |
| <i>ENAH</i>   | NM_018212    | rs2203733  | 2.03E-02 | pink | 0.14428 |        |
| <i>ENPP3</i>  | NM_005021    | rs1478091  | 1.06E-03 | pink | 0.35283 |        |
| <i>ENPP4</i>  | NM_014936    | rs7926726  | 4.26E-04 | pink | 0.19589 |        |
| <i>ENTPD7</i> | NM_020354    | rs10069803 | 8.62E-03 | pink | 0.27904 |        |
| <i>EPC1</i>   | NM_025209    | rs10136259 | 5.97E-05 | pink | 0.30551 |        |
| <i>EPHA3</i>  | NM_005233    | rs10801723 | 4.06E-03 | pink | 0.37826 |        |
| <i>EPHA3</i>  | NM_182644    | rs6551408  | 8.14E-03 | pink | 0.20341 |        |
| <i>EPHA4</i>  | NM_004438    | rs751128   | 1.38E-02 | pink | 0.50584 |        |
| <i>EPHB4</i>  | NM_004444    | rs4851274  | 5.44E-03 | pink | 0.65818 |        |
| <i>EPHX2</i>  | NM_001979    | rs10506018 | 4.81E-03 | pink | 0.60731 |        |
| <i>EPR1</i>   | NR_002219    | rs11159071 | 1.02E-02 | pink | 0.66933 |        |
| <i>EPS8L1</i> | NM_133180    | rs1353546  | 1.02E-02 | pink | 0.04140 |        |

Supplementary Table 6

|                 |              |            |          |      |         |
|-----------------|--------------|------------|----------|------|---------|
| <i>ESPL1</i>    | NM_012291    | rs1321507  | 7.52E-04 | pink | 0.32084 |
| <i>ESRRG</i>    | NM_206595    | rs2576262  | 1.76E-03 | pink | 0.04937 |
| <i>ETNK1</i>    | NM_001039481 | rs337475   | 3.36E-04 | pink | 0.40601 |
| <i>ETNK1</i>    | NM_001039481 | rs337475   | 3.36E-04 | pink | 0.36146 |
| <i>ETNK1</i>    | NM_018638    | rs337475   | 3.36E-04 | pink | 0.27185 |
| <i>ETS1</i>     | NM_005238    | rs6917351  | 1.89E-03 | pink | 0.07118 |
| <i>EXOSC9</i>   | NM_001034194 | rs10846569 | 2.39E-02 | pink | 0.74540 |
| <i>EXTL1</i>    | NM_004455    | rs198845   | 1.85E-03 | pink | 0.21606 |
| <i>EXTL3</i>    | NM_001440    | rs1996041  | 1.61E-02 | pink | 0.27859 |
| <i>FABP3</i>    | NM_004102    | rs2596220  | 1.08E-02 | pink | 0.04954 |
| <i>FAIM</i>     | NM_018147    | rs10106218 | 1.82E-03 | pink | 0.12954 |
| <i>FALZ</i>     | NM_004459    | NA         | NA       | pink | 0.16281 |
| <i>FAM101B</i>  | NM_182705    | rs11991825 | 7.61E-03 | pink | 0.23766 |
| <i>FAM111B</i>  | NM_198947    | rs946908   | 5.28E-03 | pink | 0.08750 |
| <i>FAM122B</i>  | NM_145284    | NA         | NA       | pink | 0.21135 |
| <i>FAM40B</i>   | NM_020704    | rs12417154 | 5.85E-03 | pink | 0.09343 |
| <i>FAM7A2</i>   | NM_001039841 | NA         | NA       | pink | 0.45583 |
| <i>FAM80A</i>   | NM_173642    | NA         | NA       | pink | 0.20336 |
| <i>FAM80B</i>   | NM_020734    | NA         | NA       | pink | 0.47205 |
| <i>FAM84A</i>   | NM_145175    | rs9821143  | 9.37E-03 | pink | 0.42488 |
| <i>FANCA</i>    | NM_001018112 | rs2970358  | 8.34E-03 | pink | 0.14128 |
| <i>FANCA</i>    | NM_001018112 | rs2970358  | 8.34E-03 | pink | 0.46482 |
| <i>FAT</i>      | NM_005245    | NA         | NA       | pink | 0.32467 |
| <i>FBLIM1</i>   | NM_001024215 | rs8050881  | 2.84E-02 | pink | 0.81623 |
| <i>FBLN2</i>    | NM_001004019 | rs2630453  | 2.38E-03 | pink | 0.34752 |
| <i>FBLN5</i>    | NM_006329    | rs2013116  | 6.88E-03 | pink | 0.77002 |
| <i>FBXL6</i>    | NM_024555    | rs979000   | 2.36E-02 | pink | 0.29032 |
| <i>FBXO17</i>   | NM_024907    | rs9462957  | 6.28E-03 | pink | 0.01243 |
| <i>FBXO17</i>   | NM_024907    | rs9462957  | 6.28E-03 | pink | 0.50982 |
| <i>FBXO9</i>    | NM_033480    | rs2255107  | 8.63E-03 | pink | 0.13386 |
| <i>FDXR</i>     | NM_024417    | rs1494797  | 3.86E-03 | pink | 0.06935 |
| <i>FGD5</i>     | NM_152536    | rs5980083  | 1.19E-03 | pink | 0.41275 |
| <i>FGF13</i>    | NM_004114    | NA         | NA       | pink | 0.26170 |
| <i>FGFR2</i>    | NM_022971    | NA         | NA       | pink | 0.30752 |
| <i>FIBP</i>     | NM_198897    | rs1367337  | 1.08E-01 | pink | 0.75039 |
| <i>FKBPL</i>    | NM_022110    | rs1015362  | 1.48E-02 | pink | 0.13844 |
| <i>FLCN</i>     | NM_144997    | rs2904670  | 6.38E-03 | pink | 0.38169 |
| <i>FLJ10260</i> | NM_018042    | NA         | NA       | pink | 0.51689 |
| <i>FLJ11151</i> | NM_018340    | NA         | NA       | pink | 0.02536 |
| <i>FLJ11155</i> | NM_018342    | NA         | NA       | pink | 0.50348 |
| <i>FLJ11184</i> | NM_018352    | NA         | NA       | pink | 0.02462 |
| <i>FLJ11286</i> | NM_018381    | NA         | NA       | pink | 0.32755 |
| <i>FLJ13909</i> | NM_025108    | NA         | NA       | pink | 0.88273 |
| <i>FLJ14166</i> | NM_024565    | NA         | NA       | pink | 0.58490 |
| <i>FLJ20105</i> | NM_017669    | NA         | NA       | pink | 0.11893 |
| <i>FLJ20433</i> | NM_017820    | NA         | NA       | pink | 0.67567 |
| <i>FLJ20718</i> | NM_182922    | NA         | NA       | pink | 0.44543 |
| <i>FLJ20920</i> | NM_025149    | NA         | NA       | pink | 0.12608 |
| <i>FLJ21106</i> | NM_025097    | NA         | NA       | pink | 0.43561 |

Supplementary Table 6

|                   |              |            |          |      |         |          |
|-------------------|--------------|------------|----------|------|---------|----------|
| <i>FLJ21839</i>   | NM_021831    | NA         | NA       | pink | 0.34805 |          |
| <i>FLJ21865</i>   | NM_022759    | NA         | NA       | pink | 0.35699 |          |
| <i>FLJ22624</i>   | NM_024808    | NA         | NA       | pink | 0.70458 |          |
| <i>FLJ23191</i>   | NM_024574    | NA         | NA       | pink | 0.19592 |          |
| <i>FLJ23834</i>   | NM_152750    | NA         | NA       | pink | 0.47643 |          |
| <i>FLJ25067</i>   | NM_152504    | NA         | NA       | pink | 0.22276 |          |
| <i>FLJ31659</i>   | NM_153027    | NA         | NA       | pink | 0.89791 |          |
| <i>FLJ35119</i>   | NM_175871    | NA         | NA       | pink | 0.24624 |          |
| <i>FLJ39599</i>   | NM_173803    | NA         | NA       | pink | 0.04167 |          |
| <i>FLJ45909</i>   | NM_198445    | NA         | NA       | pink | 0.06411 |          |
| <i>FLJ46082</i>   | NM_207417    | NA         | NA       | pink | 0.41584 |          |
| <i>FLNA</i>       | NM_001456    | NA         | NA       | pink | 0.24211 | epilepsy |
| <i>FMN2</i>       | NM_020066    | rs12996794 | 4.25E-03 | pink | 0.61646 |          |
| <i>FMNL3</i>      | NM_198900    | rs7405268  | 1.54E-02 | pink | 0.65530 |          |
| <i>FOLR1</i>      | NM_016725    | rs1043149  | 4.19E-02 | pink | 0.24283 |          |
| <i>FO XO3A</i>    | NM_001455    | NA         | NA       | pink | 0.51137 |          |
| <i>FSCN2</i>      | NM_012418    | rs10152417 | 1.53E-02 | pink | 0.26392 |          |
| <i>FSD1CL</i>     | NM_207647    | NA         | NA       | pink | 0.10550 |          |
| <i>G3BP1</i>      | NM_005754    | rs4725434  | 9.55E-04 | pink | 0.08991 |          |
| <i>GABBR1</i>     | NM_021905    | NA         | NA       | pink | 0.16764 | epilepsy |
| <i>GADD45GIP1</i> | NM_052850    | rs10960847 | 6.66E-03 | pink | 0.04281 |          |
| <i>GALNT10</i>    | NM_017540    | NA         | NA       | pink | 0.06883 |          |
| <i>GALR1</i>      | NM_001480    | rs12943089 | 6.21E-03 | pink | 0.13366 |          |
| <i>GAS6</i>       | NM_000820    | rs4608128  | 3.36E-03 | pink | 0.63396 |          |
| <i>GCG</i>        | NM_002054    | rs10494417 | 2.09E-02 | pink | 0.10036 |          |
| <i>GCK</i>        | NM_033508    | rs6032661  | 1.04E-02 | pink | 0.03238 |          |
| <i>GCLM</i>       | NM_002061    | rs279968   | 1.04E-02 | pink | 0.27383 |          |
| <i>GEMIN6</i>     | NM_024775    | rs1393109  | 1.17E-03 | pink | 0.90420 |          |
| <i>GFM2</i>       | NM_170681    | rs555779   | 3.13E-03 | pink | 0.10736 |          |
| <i>GGN</i>        | NM_152657    | rs717091   | 2.07E-03 | pink | 0.11441 |          |
| <i>GK</i>         | NM_203391    | NA         | NA       | pink | 0.13337 |          |
| <i>GLOXD1</i>     | NM_032756    | NA         | NA       | pink | 0.14566 |          |
| <i>GLRX2</i>      | NM_016066    | rs2575819  | 6.60E-02 | pink | 0.26518 |          |
| <i>GLRX2</i>      | NM_197962    | rs2575819  | 6.60E-02 | pink | 0.52323 |          |
| <i>GLT8D2</i>     | NM_031302    | rs17035144 | 9.06E-04 | pink | 0.79567 |          |
| <i>GLUL</i>       | NM_001033056 | rs767002   | 7.90E-02 | pink | 0.76197 |          |
| <i>GLYATL2</i>    | NM_145016    | rs7142565  | 7.92E-03 | pink | 0.05110 |          |
| <i>GM2A</i>       | NM_000405    | rs3810715  | 2.04E-02 | pink | 0.72520 |          |
| <i>GMNN</i>       | NM_015895    | rs10248878 | 6.66E-03 | pink | 0.69506 |          |
| <i>GNAS</i>       | NM_016592    | rs2968217  | 2.91E-03 | pink | 0.30097 |          |
| <i>GNG11</i>      | NM_004126    | rs213669   | 6.86E-02 | pink | 0.95052 |          |
| <i>GNL3</i>       | NM_206825    | rs37787    | 7.65E-03 | pink | 0.56895 |          |
| <i>GNPNAT1</i>    | NM_198066    | rs6974261  | 4.00E-03 | pink | 0.06124 |          |
| <i>GNPTG</i>      | NM_032520    | rs1538721  | 1.48E-03 | pink | 0.78580 |          |
| <i>GOLGA8B</i>    | NM_001023567 | rs626326   | 2.24E-02 | pink | 0.08525 |          |
| <i>GPATC2</i>     | NM_018040    | NA         | NA       | pink | 0.31683 |          |
| <i>GPC5</i>       | NM_004466    | rs11137559 | 4.74E-05 | pink | 0.21105 |          |
| <i>GPD1</i>       | NM_005276    | rs1555672  | 4.12E-03 | pink | 0.17059 |          |
| <i>GPR162</i>     | NM_019858    | rs10401027 | 3.77E-04 | pink | 0.51670 |          |

Supplementary Table 6

|                  |              |            |          |      |         |        |
|------------------|--------------|------------|----------|------|---------|--------|
| <i>GPR75</i>     | NM_006794    | rs483540   | 2.33E-02 | pink | 0.54154 |        |
| <i>GPR83</i>     | NM_016540    | rs9297912  | 5.75E-02 | pink | 0.22363 |        |
| <i>GPR98</i>     | NR_003149    | rs490812   | 1.44E-05 | pink | 0.03541 |        |
| <i>GRB10</i>     | NM_001001555 | rs6097043  | 9.55E-04 | pink | 0.19240 |        |
| <i>GRIA3</i>     | NM_181894    | NA         | NA       | pink | 0.35852 |        |
| <i>GRIP1</i>     | NM_021150    | rs1471504  | 4.02E-03 | pink | 0.39708 |        |
| <i>GRP</i>       | NM_001012513 | rs2270003  | 1.44E-02 | pink | 0.02249 |        |
| <i>GSDMDC1</i>   | NM_024736    | NA         | NA       | pink | 0.46371 |        |
| <i>GTPBP2</i>    | NM_019096    | rs766117   | 8.23E-03 | pink | 0.12776 |        |
| <i>GUCA1B</i>    | NM_002098    | rs441328   | 1.04E-02 | pink | 0.36586 |        |
| <i>H2BFS</i>     | NM_017445    | NA         | NA       | pink | 0.63325 |        |
| <i>hCAP-D3</i>   | NM_015261    | NA         | NA       | pink | 0.34228 |        |
| <i>HDC</i>       | NM_002112    | rs7405268  | 1.54E-02 | pink | 0.03742 |        |
| <i>HECA</i>      | NM_016217    | rs298461   | 4.21E-04 | pink | 0.15420 |        |
| <i>HEPACAM</i>   | NM_152722    | rs2717233  | 1.79E-02 | pink | 0.55082 |        |
| <i>HERC5</i>     | NM_016323    | rs1286899  | 6.26E-03 | pink | 0.86170 |        |
| <i>HGF</i>       | NM_001010931 | rs562770   | 2.43E-02 | pink | 0.18850 |        |
| <i>HIF1A</i>     | NM_001530    | rs198432   | 7.23E-03 | pink | 0.50620 |        |
| <i>HIST1H2AE</i> | NM_021052    | rs768039   | 1.08E-02 | pink | 0.03514 |        |
| <i>HIST1H2BD</i> | NM_138720    | rs16930371 | 8.98E-03 | pink | 0.37145 |        |
| <i>HIST2H4A</i>  | NM_003548    | NA         | NA       | pink | 0.21831 |        |
| <i>HMGA2</i>     | NM_003483    | rs8052896  | 8.45E-03 | pink | 0.15666 |        |
| <i>HMGB1</i>     | NM_002128    | rs2394185  | 4.00E-03 | pink | 0.06835 |        |
| <i>HMGB2</i>     | NM_002129    | rs4494814  | 6.75E-02 | pink | 0.10588 |        |
| <i>HNMT</i>      | NM_001024074 | rs3817939  | 1.87E-02 | pink | 0.06736 |        |
| <i>HNT</i>       | NM_001048209 | NA         | NA       | pink | 0.05182 |        |
| <i>HPS1</i>      | NM_182639    | rs1230157  | 3.70E-03 | pink | 0.14188 |        |
| <i>HSD3B7</i>    | NM_025193    | rs1702403  | 7.29E-03 | pink | 0.80689 |        |
| <i>HSPA4</i>     | NM_002154    | rs4731935  | 1.26E-02 | pink | 0.23399 |        |
| <i>HSPA4</i>     | NM_198431    | NA         | NA       | pink | 0.67189 |        |
| <i>HSPB2</i>     | NM_001541    | rs5943245  | 9.84E-03 | pink | 0.06398 |        |
| <i>HYAL3</i>     | NM_003549    | rs2958944  | 4.08E-03 | pink | 0.07431 |        |
| <i>HYDIN</i>     | NM_032821    | rs17086457 | 8.19E-04 | pink | 0.71059 |        |
| <i>HYDIN</i>     | XM_936224    | NA         | NA       | pink | 0.53398 |        |
| <i>IARS</i>      | NM_002161    | rs12429818 | 8.00E-03 | pink | 0.65445 |        |
| <i>IBRDC3</i>    | NM_153341    | NA         | NA       | pink | 0.47809 |        |
| <i>ID4</i>       | NM_001546    | rs6947148  | 8.04E-03 | pink | 0.04511 |        |
| <i>IDE</i>       | NM_004969    | rs203132   | 1.89E-03 | pink | 0.53299 |        |
| <i>IDI1</i>      | NM_004508    | rs6442164  | 2.02E-02 | pink | 0.44194 |        |
| <i>IFI30</i>     | NM_006332    | rs7789571  | 1.08E-03 | pink | 0.36234 |        |
| <i>IFI35</i>     | NM_005533    | rs1858740  | 5.59E-04 | pink | 0.40057 |        |
| <i>IFIH1</i>     | NM_022168    | rs1347353  | 1.78E-02 | pink | 0.13613 |        |
| <i>IFRD2</i>     | NM_006764    | rs2958944  | 4.08E-03 | pink | 0.74119 |        |
| <i>IGSF1</i>     | NM_001555    | NA         | NA       | pink | 0.33012 |        |
| <i>IGSF1</i>     | NM_205833    | NA         | NA       | pink | 0.05595 |        |
| <i>IGSF3</i>     | NM_001542    | rs6703791  | 1.82E-02 | pink | 0.29542 |        |
| <i>IKIP</i>      | NM_201612    | NA         | NA       | pink | 0.58349 |        |
| <i>IMMP2L</i>    | NM_032549    | rs3098728  | 1.00E-03 | pink | 0.54578 | autism |
| <i>INADL</i>     | NM_170605    | NA         | NA       | pink | 0.28128 |        |

Supplementary Table 6

|                  |              |            |          |      |         |        |
|------------------|--------------|------------|----------|------|---------|--------|
| <i>INCENP</i>    | NM_001040694 | rs10877932 | 8.91E-03 | pink | 0.82837 |        |
| <i>ING5</i>      | NM_032329    | rs2486542  | 7.63E-02 | pink | 0.18169 |        |
| <i>IQCD</i>      | NM_138451    | rs475620   | 2.34E-03 | pink | 0.27262 |        |
| <i>IQGAP1</i>    | NM_003870    | rs2202322  | 3.17E-03 | pink | 0.31219 |        |
| <i>IQGAP2</i>    | NM_006633    | rs7237754  | 2.27E-03 | pink | 0.04695 |        |
| <i>IQSEC2</i>    | NM_015075    | NA         | NA       | pink | 0.47633 |        |
| <i>IRF1</i>      | NM_002198    | rs17051076 | 1.32E-02 | pink | 0.33283 |        |
| <i>IRX5</i>      | NM_005853    | rs10762553 | 1.57E-02 | pink | 0.05175 |        |
| <i>ITGA3</i>     | NM_002204    | rs875511   | 5.38E-03 | pink | 0.21485 |        |
| <i>ITSN1</i>     | NM_001001132 | rs7014743  | 3.43E-03 | pink | 0.31873 |        |
| <i>JAG2</i>      | NM_145159    | rs13124966 | 8.13E-03 | pink | 0.12729 |        |
| <i>JMJD3</i>     | NM_001080424 | NA         | NA       | pink | 0.09045 |        |
| <i>KCNAB1</i>    | NM_172159    | rs2773218  | 6.00E-04 | pink | 0.15106 |        |
| <i>KCND1</i>     | NM_004979    | NA         | NA       | pink | 0.36283 |        |
| <i>KCND3</i>     | NM_172198    | rs475620   | 2.34E-03 | pink | 0.06911 |        |
| <i>KCNJ10</i>    | NM_002241    | rs6556377  | 1.14E-02 | pink | 0.26511 |        |
| <i>KCNK2</i>     | NM_001017425 | rs17274552 | 1.30E-02 | pink | 0.10126 |        |
| <i>KCNK4</i>     | NM_033310    | rs2286614  | 1.30E-03 | pink | 0.28987 |        |
| <i>KCNMA1</i>    | NM_001014797 | rs7071575  | 2.75E-04 | pink | 0.11097 | autism |
| <i>KCNN4</i>     | NM_002250    | rs11586980 | 2.38E-02 | pink | 0.36104 |        |
| <i>KCNT2</i>     | NM_198503    | rs13085410 | 2.33E-02 | pink | 0.39157 |        |
| <i>KDELC2</i>    | NM_153705    | rs2284290  | 4.36E-03 | pink | 0.79737 |        |
| <i>KIAA0523</i>  | NM_015253    | NA         | NA       | pink | 0.40645 |        |
| <i>KIAA0980</i>  | NM_025176    | NA         | NA       | pink | 0.05486 |        |
| <i>KIAA1324L</i> | NM_152748    | rs4073109  | 2.66E-03 | pink | 0.36655 |        |
| <i>KIAA1407</i>  | NM_020817    | rs12408865 | 2.31E-02 | pink | 0.55697 |        |
| <i>KIAA1409</i>  | NM_020818    | rs4744038  | 4.97E-03 | pink | 0.60656 |        |
| <i>KIAA1505</i>  | NM_020879    | NA         | NA       | pink | 0.78073 |        |
| <i>KIAA1683</i>  | NM_025249    | rs1495754  | 6.08E-03 | pink | 0.31419 |        |
| <i>KIAA1875</i>  | NM_032529    | NA         | NA       | pink | 0.14085 |        |
| <i>KIAA1912</i>  | XM_941554    | NA         | NA       | pink | 0.04056 |        |
| <i>KIAA2022</i>  | NM_001008537 | NA         | NA       | pink | 0.57511 |        |
| <i>KIF18A</i>    | NM_031217    | rs16962901 | 2.78E-03 | pink | 0.83794 |        |
| <i>KIF23</i>     | NM_138555    | rs12327356 | 2.22E-03 | pink | 0.71637 |        |
| <i>KIF26B</i>    | NM_018012    | rs676292   | 7.91E-03 | pink | 0.30692 |        |
| <i>KIF5A</i>     | NM_004984    | rs1485677  | 4.53E-03 | pink | 0.29181 |        |
| <i>KIFC2</i>     | NM_145754    | rs9373448  | 7.74E-02 | pink | 0.55554 |        |
| <i>KIRREL</i>    | NM_018240    | rs7527735  | 9.08E-04 | pink | 0.07785 |        |
| <i>KLF11</i>     | NM_003597    | rs7211274  | 5.54E-03 | pink | 0.27252 |        |
| <i>KLHL17</i>    | NM_198317    | rs570869   | 9.34E-03 | pink | 0.06878 |        |
| <i>KLHL2</i>     | NM_007246    | rs7698056  | 2.88E-04 | pink | 0.43263 |        |
| <i>KLHL4</i>     | NM_057162    | NA         | NA       | pink | 0.62511 |        |
| <i>KLK3</i>      | NM_001030050 | rs10888939 | 3.92E-03 | pink | 0.24845 |        |
| <i>KNTC2</i>     | NM_006101    | NA         | NA       | pink | 0.67449 |        |
| <i>KPNA2</i>     | NM_002266    | rs2127047  | 1.90E-02 | pink | 0.66781 |        |
| <i>KRIT1</i>     | NM_001013406 | rs7166968  | 5.12E-04 | pink | 0.06682 |        |
| <i>KTN1</i>      | NM_182926    | rs1461796  | 1.11E-03 | pink | 0.29516 |        |
| <i>LAMA1</i>     | NM_005559    | rs6054715  | 7.17E-04 | pink | 0.53864 |        |
| <i>LAMA1</i>     | NM_005559    | rs6054715  | 7.17E-04 | pink | 0.32906 |        |

Supplementary Table 6

|                  |              |            |          |      |         |
|------------------|--------------|------------|----------|------|---------|
| <i>LAMA3</i>     | NM_000227    | rs12517159 | 8.64E-04 | pink | 0.20287 |
| <i>LAMB3</i>     | NM_000228    | rs16839586 | 3.28E-03 | pink | 0.26744 |
| <i>LAMP2</i>     | NM_002294    | NA         | NA       | pink | 0.91794 |
| <i>LAMP2</i>     | NM_013995    | NA         | NA       | pink | 0.67444 |
| <i>LARP6</i>     | NM_197958    | rs6480263  | 3.28E-03 | pink | 0.81997 |
| <i>LCTL</i>      | NM_207338    | rs1402142  | 5.48E-02 | pink | 0.28435 |
| <i>LDHD</i>      | NM_194436    | rs10506680 | 9.80E-02 | pink | 0.24531 |
| <i>LEFTY1</i>    | NM_020997    | rs1250905  | 2.96E-01 | pink | 0.08862 |
| <i>LETM1</i>     | NM_012318    | rs7207686  | 1.99E-02 | pink | 0.61795 |
| <i>LGALS12</i>   | NM_033101    | rs10507697 | 7.69E-03 | pink | 0.06524 |
| <i>LGP2</i>      | NM_024119    | NA         | NA       | pink | 0.06082 |
| <i>LIMK1</i>     | NM_016735    | NA         | NA       | pink | 0.37387 |
| <i>LIN9</i>      | NM_173083    | rs6738983  | 6.43E-03 | pink | 0.29956 |
| <i>LMBR1L</i>    | NM_018113    | rs1386271  | 5.26E-03 | pink | 0.17254 |
| <i>LMBRD1</i>    | NM_018368    | rs1544442  | 1.08E-03 | pink | 0.86722 |
| <i>LMO3</i>      | NM_018640    | rs12221081 | 4.45E-03 | pink | 0.37412 |
| <i>LMTK3</i>     | XM_936372    | NA         | NA       | pink | 0.54358 |
| <i>LNX1</i>      | NM_032622    | rs17232701 | 1.79E-03 | pink | 0.25224 |
| <i>LOC126147</i> | NM_145807    | NA         | NA       | pink | 0.36154 |
| <i>LOC129607</i> | NM_207315    | NA         | NA       | pink | 0.06608 |
| <i>LOC130940</i> | NM_138803    | NA         | NA       | pink | 0.33794 |
| <i>LOC132241</i> | XM_934203    | NA         | NA       | pink | 0.42354 |
| <i>LOC134997</i> | NR_000030    | NA         | NA       | pink | 0.48198 |
| <i>LOC144404</i> | NM_001080825 | NA         | NA       | pink | 0.35026 |
| <i>LOC144983</i> | NM_001011724 | NA         | NA       | pink | 0.09713 |
| <i>LOC200810</i> | NM_001015050 | NA         | NA       | pink | 0.58403 |
| <i>LOC201229</i> | NM_001076680 | NA         | NA       | pink | 0.42291 |
| <i>LOC338799</i> | NR_002809    | rs7129402  | 4.41E-02 | pink | 0.70487 |
| <i>LOC348180</i> | XM_939188    | NA         | NA       | pink | 0.47520 |
| <i>LOC349236</i> | NM_182635    | NA         | NA       | pink | 0.33033 |
| <i>LOC387921</i> | NM_001017370 | NA         | NA       | pink | 0.18536 |
| <i>LOC388610</i> | NM_001013642 | NA         | NA       | pink | 0.76802 |
| <i>LOC389458</i> | NM_203393    | NA         | NA       | pink | 0.08789 |
| <i>LOC400451</i> | NM_207446    | NA         | NA       | pink | 0.33858 |
| <i>LOC400924</i> | NM_001013676 | NA         | NA       | pink | 0.19561 |
| <i>LOC400986</i> | NM_001010914 | NA         | NA       | pink | 0.19232 |
| <i>LOC402176</i> | NM_001011538 | NA         | NA       | pink | 0.17490 |
| <i>LOC440145</i> | NM_001071775 | NA         | NA       | pink | 0.37967 |
| <i>LOC441244</i> | XM_943658    | NA         | NA       | pink | 0.08702 |
| <i>LOC492311</i> | NM_001007189 | NA         | NA       | pink | 0.65989 |
| <i>LOC56902</i>  | NM_020143    | NA         | NA       | pink | 0.40567 |
| <i>LOC57228</i>  | NM_001031628 | NA         | NA       | pink | 0.17062 |
| <i>LOC606495</i> | NM_001031672 | NA         | NA       | pink | 0.12671 |
| <i>LOC649431</i> | XM_943707    | NA         | NA       | pink | 0.11184 |
| <i>LOC653098</i> | XM_925981    | NA         | NA       | pink | 0.31781 |
| <i>LOC653417</i> | XM_927326    | NA         | NA       | pink | 0.10426 |
| <i>LOC653723</i> | XM_929209    | NA         | NA       | pink | 0.33663 |
| <i>LOC653744</i> | XM_929370    | NA         | NA       | pink | 0.33910 |
| <i>LOC653803</i> | XM_376278    | NA         | NA       | pink | 0.20800 |



Supplementary Table 6

|                 |              |            |          |      |         |        |
|-----------------|--------------|------------|----------|------|---------|--------|
| <i>LOC89944</i> | NM_138342    | NA         | NA       | pink | 0.64274 |        |
| <i>LOC91353</i> | NM_001013618 | NA         | NA       | pink | 0.00797 |        |
| <i>LOC92689</i> | NM_138389    | NA         | NA       | pink | 0.18930 |        |
| <i>LPP</i>      | NM_005578    | rs2050664  | 1.59E-02 | pink | 0.79903 |        |
| <i>LRP1</i>     | NM_002332    | rs6763408  | 4.33E-03 | pink | 0.03400 |        |
| <i>LRRC24</i>   | NM_001024678 | rs1718075  | 8.40E-02 | pink | 0.08607 |        |
| <i>LRRC48</i>   | NM_031294    | rs7119188  | 5.06E-04 | pink | 0.53045 |        |
| <i>LSP1</i>     | NM_001013255 | rs1331297  | 4.26E-03 | pink | 0.20031 |        |
| <i>LTBP3</i>    | NM_021070    | rs11735072 | 2.52E-02 | pink | 0.22649 |        |
| <i>LTBP3</i>    | XM_938706    | NA         | NA       | pink | 0.07857 |        |
| <i>MAEL</i>     | NM_032858    | rs10515910 | 1.20E-02 | pink | 0.11416 |        |
| <i>MAFF</i>     | NM_012323    | rs13288123 | 1.27E-03 | pink | 0.47871 |        |
| <i>MAN2A2</i>   | NM_006122    | rs825954   | 1.51E-02 | pink | 0.25123 |        |
| <i>MANEAL</i>   | NM_001031740 | rs17127036 | 1.66E-02 | pink | 0.20567 |        |
| <i>MANSC1</i>   | NM_018050    | rs4702867  | 6.85E-03 | pink | 0.32185 |        |
| <i>MAP1B</i>    | NM_032010    | NA         | NA       | pink | 0.09979 |        |
| <i>MAP2</i>     | NM_001039538 | rs992029   | 2.46E-02 | pink | 0.33832 | autism |
| <i>MAP4K4</i>   | NM_145686    | rs6539053  | 1.50E-03 | pink | 0.11250 |        |
| <i>MASTL</i>    | NM_032844    | rs2595372  | 4.38E-02 | pink | 0.52438 |        |
| <i>MBNL2</i>    | NM_144778    | rs17685664 | 5.46E-04 | pink | 0.06988 |        |
| <i>MCAM</i>     | NM_006500    | rs3747450  | 5.28E-02 | pink | 0.07276 |        |
| <i>MCC</i>      | NM_002387    | rs4839202  | 7.48E-04 | pink | 0.51729 |        |
| <i>MCF2</i>     | NM_005369    | NA         | NA       | pink | 0.08752 |        |
| <i>MCTP1</i>    | NM_001002796 | rs203132   | 1.89E-03 | pink | 0.08487 |        |
| <i>MCTS1</i>    | NM_014060    | NA         | NA       | pink | 0.02549 |        |
| <i>MDH1B</i>    | NM_206892    | NA         | NA       | pink | 0.45346 |        |
| <i>ME1</i>      | NM_002395    | rs2788099  | 1.34E-03 | pink | 0.50600 |        |
| <i>MED12L</i>   | NM_053002    | rs10952377 | 4.47E-03 | pink | 0.16917 |        |
| <i>MET</i>      | NM_000245    | rs10850795 | 4.07E-03 | pink | 0.12520 | autism |
| <i>MGAT4C</i>   | NM_013244    | rs10231543 | 2.57E-04 | pink | 0.16618 |        |
| <i>MGC13170</i> | NM_199249    | rs6766861  | 8.05E-03 | pink | 0.75660 |        |
| <i>MGC15523</i> | NM_138570    | NA         | NA       | pink | 0.27290 |        |
| <i>MGC33648</i> | NM_153706    | NA         | NA       | pink | 0.59327 |        |
| <i>MGC72080</i> | NR_002822    | rs1941867  | 2.11E-02 | pink | 0.21355 |        |
| <i>MICAL-L1</i> | NM_033386    | NA         | NA       | pink | 0.56244 |        |
| <i>MITF</i>     | NM_198158    | rs1790834  | 2.54E-02 | pink | 0.26549 |        |
| <i>MKI67</i>    | NM_002417    | rs7793239  | 2.51E-02 | pink | 0.37653 |        |
| <i>MLC1</i>     | NM_015166    | rs9535207  | 2.98E-04 | pink | 0.67104 |        |
| <i>MLF1</i>     | NM_022443    | rs1656377  | 7.42E-03 | pink | 0.20739 |        |
| <i>MLF1IP</i>   | NM_024629    | rs755535   | 1.52E-02 | pink | 0.42862 |        |
| <i>MLL</i>      | NM_005933    | rs6661142  | 5.24E-03 | pink | 0.11561 |        |
| <i>MLL5</i>     | NM_018682    | rs985453   | 8.93E-03 | pink | 0.23009 |        |
| <i>MMP16</i>    | NM_005941    | rs6551408  | 8.14E-03 | pink | 0.13788 |        |
| <i>MMP17</i>    | NM_016155    | rs1733874  | 8.12E-03 | pink | 0.56036 |        |
| <i>MMP3</i>     | NM_002422    | rs10778228 | 9.34E-04 | pink | 0.06549 |        |
| <i>MOSC2</i>    | NM_017898    | rs12133663 | 3.26E-03 | pink | 0.61114 |        |
| <i>MR1</i>      | NM_001531    | rs3747956  | 8.01E-02 | pink | 0.57109 |        |
| <i>MRE11A</i>   | NM_005591    | rs11107798 | 3.57E-02 | pink | 0.52000 |        |
| <i>MRPL11</i>   | NM_170739    | rs6730703  | 5.70E-03 | pink | 0.02668 |        |

Supplementary Table 6

|                   |              |            |          |      |         |
|-------------------|--------------|------------|----------|------|---------|
| <i>MRPL17</i>     | NM_022061    | rs1500545  | 2.32E-03 | pink | 0.84615 |
| <i>MRPL20</i>     | NM_017971    | rs1538721  | 1.48E-03 | pink | 0.73910 |
| <i>MRPL4</i>      | NM_015956    | rs2759630  | 4.12E-03 | pink | 0.15326 |
| <i>MRPL4</i>      | NM_146387    | rs2759630  | 4.12E-03 | pink | 0.71555 |
| <i>MRPL43</i>     | NM_176792    | rs2763531  | 4.14E-02 | pink | 0.26772 |
| <i>MRPL47</i>     | NM_020409    | rs9685097  | 1.37E-02 | pink | 0.05624 |
| <i>MRPS12</i>     | NM_033363    | rs2297198  | 4.00E-03 | pink | 0.69240 |
| <i>MRPS30</i>     | NM_016640    | rs835750   | 4.64E-03 | pink | 0.60964 |
| <i>MRRF</i>       | NM_138777    | rs1011151  | 1.48E-03 | pink | 0.06157 |
| <i>MS4A6A</i>     | NM_152851    | rs17097088 | 3.14E-03 | pink | 0.00998 |
| <i>MSH5</i>       | NM_002441    | rs4445     | 5.63E-03 | pink | 0.51180 |
| <i>MSH5</i>       | NM_172166    | rs4445     | 5.63E-03 | pink | 0.15104 |
| <i>MSI2</i>       | NM_138962    | rs4687554  | 2.45E-03 | pink | 0.37955 |
| <i>MTM1</i>       | NM_000252    | NA         | NA       | pink | 0.57402 |
| <i>MTMR2</i>      | NM_016156    | rs6834248  | 4.90E-03 | pink | 0.11191 |
| <i>MTMR7</i>      | NM_004686    | rs10503593 | 6.12E-04 | pink | 0.23563 |
| <i>MTRR</i>       | NM_002454    | rs7703033  | 2.63E-03 | pink | 0.33250 |
| <i>MYB</i>        | NM_005375    | rs1979573  | 5.74E-03 | pink | 0.38114 |
| <i>MYC</i>        | NM_002467    | rs11242001 | 6.85E-03 | pink | 0.50601 |
| <i>MYLK</i>       | NM_053026    | rs13015323 | 9.11E-03 | pink | 0.05255 |
| <i>MYLK2</i>      | NM_033118    | rs11753654 | 4.48E-03 | pink | 0.01964 |
| <i>MYO1C</i>      | NM_001080779 | rs1538721  | 1.48E-03 | pink | 0.22854 |
| <i>MYO1C</i>      | NM_033375    | rs1538721  | 1.48E-03 | pink | 0.20496 |
| <i>MYO3B</i>      | NM_138995    | rs2164963  | 1.64E-03 | pink | 0.01947 |
| <i>MYOZ3</i>      | NM_133371    | rs1634079  | 1.82E-02 | pink | 0.02675 |
| <i>MYR8</i>       | NM_015011    | NA         | NA       | pink | 0.11556 |
| <i>MYST4</i>      | NM_012330    | rs308927   | 6.64E-03 | pink | 0.31875 |
| <i>NALP2</i>      | NM_017852    | NA         | NA       | pink | 0.13941 |
| <i>NCALD</i>      | NM_032041    | rs4135064  | 2.67E-03 | pink | 0.54993 |
| <i>NDUFB1</i>     | NM_004545    | rs7166968  | 5.12E-04 | pink | 0.12558 |
| <i>NEK2</i>       | NM_002497    | rs10497927 | 8.58E-03 | pink | 0.61235 |
| <i>NETO1</i>      | NM_138966    | rs10997574 | 1.36E-03 | pink | 0.08665 |
| <i>NETO1</i>      | NM_138999    | rs6566663  | 1.53E-03 | pink | 0.12844 |
| <i>NFKB2</i>      | NM_002502    | rs4338031  | 2.79E-02 | pink | 0.20161 |
| <i>NFKBIB</i>     | NM_002503    | rs2838407  | 1.35E-02 | pink | 0.17562 |
| <i>NHLRC2</i>     | NM_198514    | rs2254527  | 4.43E-04 | pink | 0.34429 |
| <i>NKD1</i>       | NM_033119    | rs974897   | 4.84E-04 | pink | 0.11135 |
| <i>NME1-NME2</i>  | NM_001018136 | rs11702684 | 1.83E-03 | pink | 0.39380 |
| <i>NME2</i>       | NM_002512    | rs11702684 | 1.83E-03 | pink | 0.16226 |
| <i>NOC3L</i>      | NM_022451    | rs27524    | 1.49E-02 | pink | 0.53035 |
| <i>NOC4L</i>      | NM_024078    | rs11246940 | 2.69E-02 | pink | 0.32387 |
| <i>NOP5/NOP58</i> | NM_015934    | NA         | NA       | pink | 0.67296 |
| <i>NOVA1</i>      | NM_006491    | rs4307059  | 1.07E-05 | pink | 0.31774 |
| <i>NOXA1</i>      | NM_006647    | rs1347142  | 3.53E-02 | pink | 0.57456 |
| <i>NPB</i>        | NM_148896    | rs1549118  | 2.16E-03 | pink | 0.11063 |
| <i>NPM3</i>       | NM_006993    | rs11164767 | 6.55E-04 | pink | 0.84157 |
| <i>NRG4</i>       | NM_138573    | rs555779   | 3.13E-03 | pink | 0.16552 |
| <i>NRIP3</i>      | NM_020645    | rs10255740 | 2.11E-03 | pink | 0.70162 |
| <i>NRM</i>        | NM_007243    | rs11150596 | 1.46E-02 | pink | 0.60020 |

Supplementary Table 6

|                  |              |            |          |      |         |        |
|------------------|--------------|------------|----------|------|---------|--------|
| <i>NRP2</i>      | NM_201264    | rs849575   | 3.75E-02 | pink | 0.25142 | autism |
| <i>NSD1</i>      | NM_022455    | rs4132381  | 3.88E-03 | pink | 0.29856 |        |
| <i>NTSR2</i>     | NM_012344    | rs1296025  | 4.06E-03 | pink | 0.10201 |        |
| <i>NUDT9P1</i>   | NR_002779    | rs3815058  | 2.25E-02 | pink | 0.26344 |        |
| <i>NUF2</i>      | NM_031423    | rs211002   | 4.48E-03 | pink | 0.47500 |        |
| <i>NUP210</i>    | NM_024923    | rs3785697  | 3.02E-04 | pink | 0.24588 |        |
| <i>NUP35</i>     | NM_138285    | rs10497621 | 2.01E-02 | pink | 0.20774 |        |
| <i>NUP50</i>     | NM_153645    | rs4714706  | 5.29E-03 | pink | 0.58654 |        |
| <i>NXPH3</i>     | NM_007225    | rs11696676 | 3.67E-03 | pink | 0.35478 |        |
| <i>NY-SAR-48</i> | NM_033417    | NA         | NA       | pink | 0.62132 |        |
| <i>ODF2</i>      | NM_153437    | rs9968804  | 4.02E-02 | pink | 0.60231 |        |
| <i>ODF2</i>      | NM_153437    | rs9968804  | 4.02E-02 | pink | 0.22849 |        |
| <i>OGN</i>       | NM_014057    | rs499927   | 6.51E-03 | pink | 0.18609 |        |
| <i>OPLAH</i>     | NM_017570    | rs10499238 | 2.22E-02 | pink | 0.75494 |        |
| <i>OR1C1</i>     | NM_012353    | rs10788766 | 1.36E-01 | pink | 0.02723 | autism |
| <i>OR6B1</i>     | NM_001005281 | rs12201873 | 1.21E-01 | pink | 0.30039 |        |
| <i>OR7E156P</i>  | NR_002171    | rs2150031  | 6.09E-04 | pink | 0.71639 |        |
| <i>OSBPL2</i>    | NM_144498    | rs1353546  | 1.02E-02 | pink | 0.16831 |        |
| <i>OSBPL3</i>    | NM_145322    | rs2975186  | 1.78E-03 | pink | 0.25723 |        |
| <i>P18SRP</i>    | NM_173829    | NA         | NA       | pink | 0.23728 |        |
| <i>P2RY1</i>     | NM_002563    | rs6597446  | 3.74E-02 | pink | 0.30107 |        |
| <i>P4HA2</i>     | NM_001017974 | rs4751145  | 6.29E-03 | pink | 0.32552 |        |
| <i>PACRG</i>     | NM_001080379 | rs1936075  | 6.98E-05 | pink | 0.48821 |        |
| <i>PACRG</i>     | NM_152410    | rs1936075  | 6.98E-05 | pink | 0.28923 |        |
| <i>PAK1IP1</i>   | NM_017906    | rs11784061 | 1.52E-03 | pink | 0.06077 |        |
| <i>PAK3</i>      | NM_002578    | NA         | NA       | pink | 0.20727 |        |
| <i>PANK3</i>     | NM_024594    | rs9858485  | 9.37E-03 | pink | 0.32364 |        |
| <i>PAQR9</i>     | NM_198504    | rs2328518  | 2.76E-02 | pink | 0.34486 |        |
| <i>PCBP3</i>     | NM_020528    | rs7491248  | 1.35E-03 | pink | 0.22910 |        |
| <i>PCDH20</i>    | NM_022843    | rs2408109  | 2.64E-02 | pink | 0.85229 |        |
| <i>PCDHA3</i>    | NM_018906    | rs6577995  | 5.22E-03 | pink | 0.53870 |        |
| <i>PCDHA4</i>    | NM_031500    | rs16910093 | 1.87E-02 | pink | 0.06256 |        |
| <i>PCDHA7</i>    | NM_031852    | rs1267622  | 4.01E-02 | pink | 0.06070 |        |
| <i>PCDHAC1</i>   | NM_031882    | rs964942   | 2.65E-02 | pink | 0.40706 |        |
| <i>PCDHB10</i>   | NM_018930    | rs11924964 | 1.62E-01 | pink | 0.41113 |        |
| <i>PCDHB11</i>   | NM_018931    | rs11924964 | 1.62E-01 | pink | 0.03853 |        |
| <i>PCDHGC3</i>   | NM_002588    | rs1584783  | 5.70E-05 | pink | 0.10704 |        |
| <i>PCGF5</i>     | NM_032373    | rs4744038  | 4.97E-03 | pink | 0.69488 |        |
| <i>PCNA</i>      | NM_182649    | rs4765803  | 4.53E-04 | pink | 0.30837 |        |
| <i>PCNXL2</i>    | NM_024938    | NA         | NA       | pink | 0.47820 |        |
| <i>PDE1C</i>     | NM_005020    | rs17508455 | 4.07E-04 | pink | 0.43956 |        |
| <i>PDE7B</i>     | NM_018945    | rs1364407  | 3.93E-03 | pink | 0.20188 |        |
| <i>PDLIM7</i>    | NM_213636    | rs10798623 | 9.50E-02 | pink | 0.93098 |        |
| <i>PEG10</i>     | NM_001040152 | rs279968   | 1.04E-02 | pink | 0.54228 |        |
| <i>PFAS</i>      | NM_012393    | rs3782681  | 3.20E-02 | pink | 0.57466 |        |
| <i>PGAP1</i>     | NM_024989    | rs1580820  | 4.66E-02 | pink | 0.09324 |        |
| <i>PGBD3</i>     | NM_170753    | rs16964864 | 4.21E-02 | pink | 0.14079 |        |
| <i>PGM5</i>      | NM_021965    | rs10506635 | 4.04E-03 | pink | 0.30935 |        |
| <i>PGM5</i>      | NM_021965    | rs10506635 | 4.04E-03 | pink | 0.19514 |        |

Supplementary Table 6

|                 |              |            |          |      |         |                   |
|-----------------|--------------|------------|----------|------|---------|-------------------|
| <i>PHACTR1</i>  | NM_030948    | rs10511576 | 6.01E-05 | pink | 0.54954 |                   |
| <i>PHACTR3</i>  | NM_080672    | rs11852448 | 1.04E-03 | pink | 0.04975 |                   |
| <i>PHF14</i>    | NM_014660    | rs985157   | 3.11E-03 | pink | 0.58133 |                   |
| <i>PHF19</i>    | NM_001009936 | rs7841293  | 4.90E-02 | pink | 0.81494 |                   |
| <i>PHF20L1</i>  | NM_198513    | rs10165601 | 9.66E-03 | pink | 0.23128 |                   |
| <i>PHTF2</i>    | NM_020432    | rs1477264  | 4.79E-03 | pink | 0.18990 |                   |
| <i>PILRA</i>    | NM_178272    | rs2286265  | 8.55E-03 | pink | 0.05371 |                   |
| <i>PINX1</i>    | NM_017884    | rs2230906  | 8.40E-04 | pink | 0.42231 | autism            |
| <i>PIP5K1B</i>  | NM_001031687 | NA         | NA       | pink | 0.15239 |                   |
| <i>PITX2</i>    | NM_153427    | rs1349348  | 2.34E-02 | pink | 0.27391 |                   |
| <i>PLAG1</i>    | NM_002655    | rs10783915 | 5.19E-04 | pink | 0.26936 |                   |
| <i>PLAUR</i>    | NM_001005376 | rs12429253 | 7.70E-03 | pink | 0.74223 | autism & epilepsy |
| <i>PLCH1</i>    | NM_014996    | rs1850847  | 2.79E-03 | pink | 0.31968 |                   |
| <i>PLEKHA1</i>  | NM_021622    | rs10934622 | 9.94E-05 | pink | 0.20382 |                   |
| <i>PLEKHH1</i>  | NM_020715    | rs4317552  | 9.80E-03 | pink | 0.73431 |                   |
| <i>PLEKHJ1</i>  | NM_018049    | rs7127900  | 4.58E-03 | pink | 0.39682 |                   |
| <i>PLK1</i>     | NM_005030    | rs13378562 | 2.72E-03 | pink | 0.34314 |                   |
| <i>PLK2</i>     | NM_006622    | rs32617    | 1.30E-02 | pink | 0.07277 |                   |
| <i>PLP2</i>     | NM_002668    | NA         | NA       | pink | 0.06469 |                   |
| <i>PLSCR1</i>   | NM_021105    | rs2134852  | 2.60E-02 | pink | 0.40130 |                   |
| <i>PLXNA1</i>   | NM_032242    | rs339085   | 1.84E-02 | pink | 0.54250 |                   |
| <i>PNRC1</i>    | NM_006813    | rs11743030 | 4.05E-06 | pink | 0.17677 |                   |
| <i>POFUT1</i>   | NM_172236    | rs466767   | 1.64E-03 | pink | 0.06352 |                   |
| <i>POL3S</i>    | NM_001039503 | NA         | NA       | pink | 0.14728 |                   |
| <i>POLA1</i>    | NM_016937    | NA         | NA       | pink | 0.60357 |                   |
| <i>POLD1</i>    | NM_002691    | rs160078   | 1.63E-03 | pink | 0.50967 |                   |
| <i>POLE</i>     | NM_006231    | rs10988554 | 1.14E-02 | pink | 0.37508 |                   |
| <i>POLR3D</i>   | NM_001722    | rs970348   | 1.73E-02 | pink | 0.56352 |                   |
| <i>PORCN</i>    | NM_022825    | NA         | NA       | pink | 0.02748 |                   |
| <i>POU2F1</i>   | NM_002697    | rs573814   | 1.31E-02 | pink | 0.46232 |                   |
| <i>PPAP2B</i>   | NM_003713    | rs9537662  | 3.67E-03 | pink | 0.41258 |                   |
| <i>PPAP2B</i>   | NM_177414    | NA         | NA       | pink | 0.89525 |                   |
| <i>PPAP2C</i>   | NM_177543    | rs10967209 | 1.34E-02 | pink | 0.26326 |                   |
| <i>PPAPDC1B</i> | NM_032483    | rs1565866  | 9.24E-03 | pink | 0.64635 |                   |
| <i>PPIL5</i>    | NM_152329    | rs11903014 | 9.25E-03 | pink | 0.89170 |                   |
| <i>PPM2C</i>    | NM_018444    | NA         | NA       | pink | 0.13174 |                   |
| <i>PPP1R14A</i> | NM_033256    | rs10506257 | 3.11E-02 | pink | 0.16340 |                   |
| <i>PPP1R1B</i>  | NM_032192    | rs8096947  | 2.56E-02 | pink | 0.19447 |                   |
| <i>PPP1R3B</i>  | NM_024607    | rs11715608 | 8.31E-04 | pink | 0.08590 |                   |
| <i>PPP2R1B</i>  | NM_181699    | rs12705796 | 1.33E-03 | pink | 0.51702 |                   |
| <i>PPP2R3B</i>  | NM_199326    | NA         | NA       | pink | 0.35625 |                   |
| <i>PRDM1</i>    | NM_001198    | rs1404784  | 1.49E-02 | pink | 0.29013 |                   |
| <i>PRPF40B</i>  | NM_001031698 | rs12587756 | 7.30E-03 | pink | 0.07015 |                   |
| <i>PRPS2</i>    | NM_001039091 | NA         | NA       | pink | 0.66475 |                   |
| <i>PRRT2</i>    | NM_145239    | rs6783723  | 6.17E-03 | pink | 0.31196 |                   |
| <i>PRSS27</i>   | NM_031948    | rs17743926 | 6.96E-03 | pink | 0.44902 |                   |
| <i>PSEN1</i>    | NM_000021    | rs1192250  | 1.34E-03 | pink | 0.04719 |                   |
| <i>PSMD12</i>   | NM_002816    | rs17067237 | 5.67E-03 | pink | 0.58204 |                   |
| <i>PSRC1</i>    | NM_001032291 | rs7654972  | 1.09E-02 | pink | 0.50206 |                   |

Supplementary Table 6

|                  |              |            |          |      |         |
|------------------|--------------|------------|----------|------|---------|
| <i>PSRC1</i>     | NM_001032290 | NA         | NA       | pink | 0.01742 |
| <i>PSTPIP2</i>   | NM_024430    | rs7000214  | 1.70E-03 | pink | 0.26997 |
| <i>PTK2</i>      | NM_153831    | rs253438   | 2.11E-04 | pink | 0.77223 |
| <i>PTPN3</i>     | NM_002829    | rs4627009  | 4.46E-03 | pink | 0.04551 |
| <i>PTPRD</i>     | NM_130391    | rs10758979 | 3.28E-03 | pink | 0.40765 |
| <i>PTPRD</i>     | NM_130391    | rs10758979 | 3.28E-03 | pink | 0.91671 |
| <i>PTPRE</i>     | NM_006504    | rs1119738  | 1.39E-03 | pink | 0.19141 |
| <i>PTPRG</i>     | NM_002841    | rs1286831  | 6.00E-04 | pink | 0.37956 |
| <i>PURA</i>      | NM_005859    | rs12548855 | 1.71E-02 | pink | 0.31890 |
| <i>PVRL1</i>     | NM_203285    | rs7604059  | 1.25E-02 | pink | 0.03359 |
| <i>PXMP4</i>     | NM_007238    | rs10011864 | 4.49E-03 | pink | 0.37270 |
| <i>PYCRL</i>     | NM_023078    | rs13419007 | 3.63E-02 | pink | 0.12654 |
| <i>RAB11FIP4</i> | NM_032932    | rs2992299  | 1.29E-03 | pink | 0.28612 |
| <i>RAB15</i>     | NM_198686    | rs7188225  | 1.11E-03 | pink | 0.04452 |
| <i>RAB3B</i>     | NM_002867    | rs2456207  | 4.36E-03 | pink | 0.07352 |
| <i>RARRES1</i>   | NM_002888    | rs10515809 | 3.13E-02 | pink | 0.14420 |
| <i>RASA1</i>     | NM_022650    | rs8016092  | 4.67E-03 | pink | 0.02123 |
| <i>RASAL2</i>    | NM_170692    | rs4132381  | 3.88E-03 | pink | 0.36905 |
| <i>RASD2</i>     | NM_014310    | rs4829329  | 7.06E-03 | pink | 0.68891 |
| <i>RASSF5</i>    | NM_182664    | rs6693578  | 1.94E-03 | pink | 0.28599 |
| <i>RAXL1</i>     | NM_032753    | NA         | NA       | pink | 0.11873 |
| <i>RBBP8</i>     | NM_002894    | rs2520355  | 6.82E-04 | pink | 0.42033 |
| <i>RBL1</i>      | NM_002895    | rs4244559  | 1.03E-03 | pink | 0.37706 |
| <i>RBM13</i>     | NM_032509    | NA         | NA       | pink | 0.21385 |
| <i>RBP7</i>      | NM_052960    | rs1859586  | 2.45E-03 | pink | 0.21560 |
| <i>RDH12</i>     | NM_152443    | rs10996684 | 9.43E-03 | pink | 0.29238 |
| <i>RDM1</i>      | NM_001034836 | rs6777902  | 1.62E-02 | pink | 0.10699 |
| <i>RELB</i>      | NM_006509    | rs739431   | 8.66E-04 | pink | 0.42850 |
| <i>RENBP</i>     | NM_002910    | NA         | NA       | pink | 0.48457 |
| <i>REPS2</i>     | XM_942570    | NA         | NA       | pink | 0.21701 |
| <i>RFC2</i>      | NM_002914    | rs11626364 | 1.12E-02 | pink | 0.50730 |
| <i>RFC3</i>      | NM_181558    | rs10954906 | 1.42E-03 | pink | 0.29019 |
| <i>RFFL</i>      | NM_001017368 | rs1264581  | 7.52E-03 | pink | 0.28620 |
| <i>RFPL1S</i>    | NR_002727    | rs10138219 | 1.60E-02 | pink | 0.33027 |
| <i>RFXANK</i>    | NM_003721    | rs2503349  | 2.70E-04 | pink | 0.36950 |
| <i>RGAG4</i>     | NM_001024455 | NA         | NA       | pink | 0.28137 |
| <i>RGS11</i>     | NM_183337    | rs10967209 | 1.34E-02 | pink | 0.43311 |
| <i>RGS2</i>      | NM_002923    | rs16834831 | 1.17E-01 | pink | 0.28871 |
| <i>RGS3</i>      | NM_144489    | rs2662482  | 1.92E-02 | pink | 0.43711 |
| <i>RIMS4</i>     | NM_182970    | rs1981008  | 4.49E-03 | pink | 0.18204 |
| <i>RIT2</i>      | NM_002930    | rs1393109  | 1.17E-03 | pink | 0.11492 |
| <i>RKHD3</i>     | NM_032246    | NA         | NA       | pink | 0.79491 |
| <i>RNASEH2A</i>  | NM_006397    | rs1024580  | 2.01E-03 | pink | 0.78471 |
| <i>RNF36</i>     | NM_182985    | rs1078342  | 3.70E-02 | pink | 0.22035 |
| <i>ROPN1L</i>    | NM_031916    | rs2662970  | 1.09E-02 | pink | 0.32582 |
| <i>ROR1</i>      | NM_005012    | rs1034505  | 3.37E-03 | pink | 0.54429 |
| <i>RPA3</i>      | NM_002947    | rs12448409 | 5.66E-06 | pink | 0.28643 |
| <i>RPE65</i>     | NM_000329    | rs11581095 | 6.06E-03 | pink | 0.54109 |
| <i>RPIB9</i>     | NM_138290    | NA         | NA       | pink | 0.72112 |

Supplementary Table 6

|                 |              |            |          |      |         |                   |
|-----------------|--------------|------------|----------|------|---------|-------------------|
| <i>RPL34</i>    | NM_033625    | rs9301445  | 1.01E-02 | pink | 0.30455 |                   |
| <i>RPL36A</i>   | NM_021029    | NA         | NA       | pink | 0.22939 |                   |
| <i>RPRM</i>     | NM_019845    | rs4960657  | 8.88E-03 | pink | 0.75667 |                   |
| <i>RPS6KA1</i>  | NM_001006665 | rs2992299  | 1.29E-03 | pink | 0.19300 |                   |
| <i>RPS6KA3</i>  | XM_944112    | NA         | NA       | pink | 0.31812 |                   |
| <i>RRAGB</i>    | NM_016656    | NA         | NA       | pink | 0.60850 |                   |
| <i>RSHL3</i>    | NM_001010892 | NA         | NA       | pink | 0.69725 |                   |
| <i>RTN2</i>     | NM_206902    | NA         | NA       | pink | 0.60600 |                   |
| <i>RTN2</i>     | NM_206902    | NA         | NA       | pink | 0.15657 |                   |
| <i>RTN3</i>     | NM_201429    | rs2150031  | 6.09E-04 | pink | 0.21815 |                   |
| <i>RTN4</i>     | NM_007008    | rs4239673  | 7.21E-03 | pink | 0.81438 |                   |
| <i>RUFY2</i>    | NM_001042417 | rs6960495  | 3.22E-03 | pink | 0.09364 |                   |
| <i>RUFY3</i>    | NM_001037442 | rs11823867 | 2.28E-03 | pink | 0.68394 |                   |
| <i>S100A3</i>   | NM_002960    | rs9883613  | 3.23E-02 | pink | 0.06144 |                   |
| <i>S100A4</i>   | NM_002961    | rs9883613  | 3.23E-02 | pink | 0.57535 |                   |
| <i>S100A4</i>   | NM_002961    | rs9883613  | 3.23E-02 | pink | 0.23101 |                   |
| <i>S100B</i>    | NM_006272    | rs1077216  | 1.10E-03 | pink | 0.31494 |                   |
| <i>SART2</i>    | NM_013352    | NA         | NA       | pink | 0.27219 |                   |
| <i>SC4MOL</i>   | NM_006745    | rs7698056  | 2.88E-04 | pink | 0.31374 |                   |
| <i>SC4MOL</i>   | NM_006745    | rs7698056  | 2.88E-04 | pink | 0.19092 |                   |
| <i>SCAMP5</i>   | NM_138967    | rs12943089 | 6.21E-03 | pink | 0.64942 |                   |
| <i>SCN1A</i>    | NM_006920    | rs1998168  | 1.08E-02 | pink | 0.37441 | autism & epilepsy |
| <i>SCN3B</i>    | NM_018400    | rs3867146  | 1.81E-02 | pink | 0.12854 |                   |
| <i>SCNN1B</i>   | NM_000336    | rs7218952  | 1.98E-03 | pink | 0.12653 |                   |
| <i>SCNN1D</i>   | NM_002978    | rs8078073  | 5.87E-03 | pink | 0.27544 |                   |
| <i>SCRT2</i>    | NM_033129    | rs936469   | 3.30E-03 | pink | 0.70939 |                   |
| <i>SDC1</i>     | NM_002997    | rs11624594 | 8.09E-04 | pink | 0.87346 |                   |
| <i>SEC24A</i>   | NM_021982    | rs1432288  | 9.99E-03 | pink | 0.07926 |                   |
| <i>SEC24D</i>   | NM_014822    | rs2064570  | 1.05E-02 | pink | 0.37496 |                   |
| <i>SELI</i>     | NM_033505    | NA         | NA       | pink | 0.15868 |                   |
| <i>SEMA3B</i>   | NM_001005914 | rs2282751  | 9.49E-04 | pink | 0.04993 |                   |
| <i>SEMA6C</i>   | NM_030913    | rs4972269  | 5.76E-02 | pink | 0.36395 |                   |
| <i>SEPN1</i>    | NM_206926    | rs4307059  | 1.07E-05 | pink | 0.83927 |                   |
| <i>SERINC1</i>  | NM_020755    | rs4936810  | 7.47E-04 | pink | 0.62768 |                   |
| <i>SERTAD3</i>  | NM_203344    | rs7699135  | 5.17E-03 | pink | 0.32588 |                   |
| <i>SFPQ</i>     | NM_005066    | rs2834803  | 6.19E-03 | pink | 0.22466 |                   |
| <i>SFXN3</i>    | NM_030971    | rs11190790 | 3.29E-02 | pink | 0.04089 |                   |
| <i>SGK3</i>     | NM_170709    | rs11691501 | 5.17E-03 | pink | 0.21818 |                   |
| <i>SH2D3C</i>   | NM_170600    | rs11018376 | 4.55E-03 | pink | 0.59801 |                   |
| <i>SHC1</i>     | NM_183001    | rs2239466  | 2.27E-03 | pink | 0.61423 |                   |
| <i>SHC3</i>     | NM_016848    | rs17731311 | 1.02E-03 | pink | 0.53862 |                   |
| <i>SHMT1</i>    | NM_004169    | rs1178339  | 1.34E-04 | pink | 0.13377 |                   |
| <i>SIX4</i>     | NM_017420    | rs1353546  | 1.02E-02 | pink | 0.30807 |                   |
| <i>SLA/LP</i>   | NM_016955    | NA         | NA       | pink | 0.06514 |                   |
| <i>SLC15A3</i>  | NM_016582    | rs13064050 | 5.02E-03 | pink | 0.48984 |                   |
| <i>SLC16A13</i> | NM_201566    | rs10492951 | 2.73E-03 | pink | 0.03432 |                   |
| <i>SLC16A4</i>  | NM_004696    | rs3797755  | 5.65E-03 | pink | 0.30576 |                   |
| <i>SLC1A1</i>   | NM_004170    | rs12368152 | 8.50E-03 | pink | 0.36346 | autism            |
| <i>SLC1A2</i>   | NM_004171    | rs7120564  | 1.17E-03 | pink | 0.60444 | epilepsy          |

Supplementary Table 6

|                   |              |            |          |      |         |
|-------------------|--------------|------------|----------|------|---------|
| <i>SLC22A17</i>   | NM_020372    | rs2827617  | 2.59E-03 | pink | 0.49986 |
| <i>SLC25A13</i>   | NM_014251    | rs4509239  | 2.31E-03 | pink | 0.40226 |
| <i>SLC25A26</i>   | NM_173471    | rs10492203 | 5.23E-04 | pink | 0.20925 |
| <i>SLC25A27</i>   | NM_004277    | rs17118127 | 4.87E-03 | pink | 0.29919 |
| <i>SLC25A34</i>   | NM_207348    | rs8050881  | 2.84E-02 | pink | 0.19069 |
| <i>SLC29A1</i>    | NM_001078174 | rs4942369  | 8.99E-03 | pink | 0.51115 |
| <i>SLC2A4RG</i>   | NM_020062    | rs17828306 | 1.22E-03 | pink | 0.78651 |
| <i>SLC2A9</i>     | NM_001001290 | rs2654718  | 2.71E-03 | pink | 0.20828 |
| <i>SLC35D1</i>    | NM_015139    | rs4542295  | 5.39E-03 | pink | 0.33623 |
| <i>SLC35E4</i>    | NM_001001479 | rs1064019  | 4.99E-02 | pink | 0.38803 |
| <i>SLC39A3</i>    | NM_213568    | rs17743926 | 6.96E-03 | pink | 0.18908 |
| <i>SLC43A2</i>    | NM_152346    | rs1514687  | 1.83E-03 | pink | 0.70772 |
| <i>SLC45A1</i>    | NM_001080397 | rs11606763 | 1.07E-02 | pink | 0.26768 |
| <i>SLC4A2</i>     | NM_003040    | rs9288706  | 2.21E-02 | pink | 0.21116 |
| <i>SLC6A12</i>    | NM_003044    | rs727056   | 2.01E-03 | pink | 0.81595 |
| <i>SLC6A20</i>    | NM_022405    | rs13033787 | 1.09E-02 | pink | 0.07549 |
| <i>SLC7A6</i>     | NM_001076785 | rs8064579  | 6.41E-03 | pink | 0.21710 |
| <i>SLC7A6</i>     | NM_003983    | rs8064579  | 6.41E-03 | pink | 0.15959 |
| <i>SMARCD2</i>    | NM_003077    | NA         | NA       | pink | 0.39813 |
| <i>SMC2L1</i>     | NM_006444    | rs2725762  | 2.61E-02 | pink | 0.62953 |
| <i>SMC6L1</i>     | NM_024624    | NA         | NA       | pink | 0.20972 |
| <i>SNORD36A</i>   | NR_002448    | rs7428024  | 2.75E-02 | pink | 0.23253 |
| <i>SNRPB</i>      | NM_003091    | rs11715813 | 1.90E-02 | pink | 0.92590 |
| <i>SNX16</i>      | NM_022133    | rs972827   | 1.26E-03 | pink | 0.73063 |
| <i>SOX12</i>      | NM_006943    | rs10967209 | 1.34E-02 | pink | 0.56923 |
| <i>SPAG8</i>      | NM_001039592 | rs2942382  | 3.35E-03 | pink | 0.10426 |
| <i>SPAG8</i>      | NM_172312    | rs2942382  | 3.35E-03 | pink | 0.06714 |
| <i>SPAG9</i>      | NM_172345    | NA         | NA       | pink | 0.79220 |
| <i>SPG7</i>       | NM_199367    | rs1493007  | 1.13E-02 | pink | 0.21451 |
| <i>SPINT2</i>     | NM_021102    | rs5765901  | 1.16E-02 | pink | 0.36779 |
| <i>SPRED3</i>     | NM_001042522 | rs717091   | 2.07E-03 | pink | 0.05696 |
| <i>SPRY1</i>      | NM_005841    | rs7108303  | 2.25E-02 | pink | 0.05830 |
| <i>SPRY2</i>      | NM_005842    | rs7816685  | 2.41E-02 | pink | 0.54113 |
| <i>SPSB3</i>      | NM_080861    | rs1124200  | 4.46E-03 | pink | 0.81663 |
| <i>SPTBN1</i>     | NM_003128    | rs8003961  | 1.82E-03 | pink | 0.51589 |
| <i>SPTLC2</i>     | NM_004863    | rs11643648 | 6.88E-04 | pink | 0.33262 |
| <i>SREBF1</i>     | NM_004176    | rs11683808 | 5.07E-03 | pink | 0.39615 |
| <i>SS18</i>       | NM_001007559 | rs6452027  | 7.50E-04 | pink | 0.27559 |
| <i>SS18L1</i>     | NM_015558    | NA         | NA       | pink | 0.73123 |
| <i>SSFA2</i>      | NM_006751    | rs11729166 | 1.37E-02 | pink | 0.35551 |
| <i>SSH1</i>       | NM_018984    | rs2267882  | 8.29E-03 | pink | 0.33800 |
| <i>ST6GALNAC2</i> | NM_006456    | rs10125617 | 5.51E-02 | pink | 0.09532 |
| <i>ST8SIA4</i>    | NM_175052    | rs12428596 | 6.52E-03 | pink | 0.07026 |
| <i>STARD13</i>    | NM_178006    | rs10136259 | 5.97E-05 | pink | 0.64728 |
| <i>STARD7</i>     | NM_020151    | rs2888124  | 5.76E-03 | pink | 0.11919 |
| <i>STEAP2</i>     | NM_152999    | rs1897832  | 2.73E-03 | pink | 0.55085 |
| <i>STEAP2</i>     | NM_152999    | rs1897832  | 2.73E-03 | pink | 0.37941 |
| <i>STEAP3</i>     | NM_182915    | rs17750541 | 4.58E-03 | pink | 0.24261 |
| <i>STGC3</i>      | NM_001006608 | NA         | NA       | pink | 0.04263 |

Supplementary Table 6

|                  |              |            |          |      |         |          |
|------------------|--------------|------------|----------|------|---------|----------|
| <i>STIL</i>      | NM_003035    | rs7324484  | 1.04E-03 | pink | 0.59611 |          |
| <i>STOX1</i>     | NM_152709    | rs12883168 | 5.01E-03 | pink | 0.64691 |          |
| <i>STRBP</i>     | NM_018387    | rs13015323 | 9.11E-03 | pink | 0.47999 |          |
| <i>SUHW4</i>     | NM_001002844 | NA         | NA       | pink | 0.39025 |          |
| <i>SUHW4</i>     | NM_001002844 | NA         | NA       | pink | 0.19019 |          |
| <i>SULT1A3</i>   | NM_003166    | NA         | NA       | pink | 0.19467 |          |
| <i>SULT1C2</i>   | NM_006588    | NA         | NA       | pink | 0.64536 |          |
| <i>SURF2</i>     | NM_017503    | rs4241365  | 2.68E-02 | pink | 0.08419 |          |
| <i>SYN1</i>      | NM_006950    | NA         | NA       | pink | 0.09907 | epilepsy |
| <i>SYNE2</i>     | NM_015180    | rs7825567  | 6.08E-04 | pink | 0.16031 |          |
| <i>SYNE2</i>     | NM_015180    | rs7825567  | 6.08E-04 | pink | 0.27180 |          |
| <i>SYNGR1</i>    | NM_145731    | rs11070241 | 4.65E-03 | pink | 0.57968 |          |
| <i>SYNGR1</i>    | NM_145738    | rs11070241 | 4.65E-03 | pink | 0.51408 |          |
| <i>SYNJ1</i>     | NM_203446    | rs6756581  | 8.38E-04 | pink | 0.39321 |          |
| <i>SYT1</i>      | NM_005639    | rs10793345 | 1.70E-04 | pink | 0.94398 |          |
| <i>SYTL2</i>     | NM_206930    | rs4907105  | 8.62E-03 | pink | 0.56898 |          |
| <i>TACR1</i>     | NM_001058    | rs2242258  | 1.30E-03 | pink | 0.03888 |          |
| <i>TACR1</i>     | NM_015727    | rs2242258  | 1.30E-03 | pink | 0.03668 |          |
| <i>TADA2L</i>    | NM_133439    | NA         | NA       | pink | 0.37064 |          |
| <i>TAF1B</i>     | NM_005680    | rs1859586  | 2.45E-03 | pink | 0.58789 |          |
| <i>TAGLN</i>     | NM_001001522 | rs2145357  | 2.99E-03 | pink | 0.85385 |          |
| <i>TARS</i>      | NM_152295    | rs6462481  | 2.99E-03 | pink | 0.25160 |          |
| <i>TBRG4</i>     | NM_199122    | rs6775113  | 4.72E-03 | pink | 0.74208 |          |
| <i>TCF19</i>     | NM_001077511 | rs1557275  | 3.13E-03 | pink | 0.57367 |          |
| <i>TCF19</i>     | NM_007109    | rs1557275  | 3.13E-03 | pink | 0.33149 |          |
| <i>TDP1</i>      | NM_018319    | rs10801723 | 4.06E-03 | pink | 0.39374 |          |
| <i>TFAP2B</i>    | NM_003221    | rs17504439 | 7.67E-04 | pink | 0.44425 |          |
| <i>TFAP2C</i>    | NM_003222    | rs11003452 | 1.17E-02 | pink | 0.24281 |          |
| <i>TFCP2L1</i>   | NM_014553    | rs1537510  | 9.04E-03 | pink | 0.18219 |          |
| <i>TGFBR3</i>    | NM_003243    | rs10083274 | 1.18E-03 | pink | 0.29598 |          |
| <i>THRA</i>      | NM_199334    | rs2016520  | 7.04E-04 | pink | 0.95040 |          |
| <i>THRAP2</i>    | NM_015335    | NA         | NA       | pink | 0.03511 |          |
| <i>THSD1</i>     | NM_018676    | rs627860   | 1.22E-03 | pink | 0.14041 |          |
| <i>TIMM17A</i>   | NM_006335    | rs13012419 | 2.89E-03 | pink | 0.34249 |          |
| <i>TLE3</i>      | NM_005078    | rs7765600  | 2.29E-03 | pink | 0.63662 |          |
| <i>TLE6</i>      | NM_024760    | rs8078781  | 1.59E-04 | pink | 0.45312 |          |
| <i>TLN2</i>      | NM_015059    | rs1450774  | 6.51E-03 | pink | 0.16260 |          |
| <i>TLR5</i>      | NM_003268    | rs4674556  | 3.82E-02 | pink | 0.13960 |          |
| <i>TMEM104</i>   | NM_017728    | rs12883168 | 5.01E-03 | pink | 0.28855 |          |
| <i>TMEM164</i>   | NM_032227    | NA         | NA       | pink | 0.14393 |          |
| <i>TMEM20</i>    | NM_153226    | rs749974   | 2.90E-02 | pink | 0.50475 |          |
| <i>TMEM93</i>    | NM_001014764 | rs7883545  | 2.53E-04 | pink | 0.32421 |          |
| <i>TMPO</i>      | NM_003276    | rs4121680  | 5.17E-03 | pink | 0.14916 |          |
| <i>TMSL8</i>     | NM_021992    | NA         | NA       | pink | 0.15234 |          |
| <i>TNFAIP8L1</i> | NM_152362    | rs754814   | 2.75E-02 | pink | 0.89390 |          |
| <i>TNFRSF10B</i> | NM_003842    | rs940009   | 1.18E-03 | pink | 0.07675 |          |
| <i>TNFRSF10B</i> | NM_147187    | rs940009   | 1.18E-03 | pink | 0.22702 |          |
| <i>TNFRSF10D</i> | NM_003840    | rs4655128  | 3.78E-03 | pink | 0.20893 |          |
| <i>TNFRSF25</i>  | NM_148973    | NA         | NA       | pink | 0.29287 |          |



Supplementary Table 6

|                |              |            |          |      |         |
|----------------|--------------|------------|----------|------|---------|
| <i>TNKS</i>    | NM_003747    | rs2654718  | 2.71E-03 | pink | 0.09712 |
| <i>TNNI3K</i>  | NM_015978    | rs7087762  | 8.13E-03 | pink | 0.40693 |
| <i>TNRC6B</i>  | NM_001024843 | rs1393109  | 1.17E-03 | pink | 0.43411 |
| <i>TOE1</i>    | NM_025077    | rs12498156 | 2.49E-02 | pink | 0.15637 |
| <i>TOM1L2</i>  | NM_144678    | NA         | NA       | pink | 0.69019 |
| <i>TOP1MT</i>  | NM_052963    | rs7625382  | 4.45E-02 | pink | 0.23438 |
| <i>TOP1MT</i>  | XM_944877    | NA         | NA       | pink | 0.34749 |
| <i>TP53I11</i> | NM_006034    | rs718798   | 1.35E-03 | pink | 0.04377 |
| <i>TP53TG3</i> | NM_016212    | NA         | NA       | pink | 0.05122 |
| <i>TPM1</i>    | NM_001018008 | rs6011530  | 1.02E-03 | pink | 0.23806 |
| <i>TPTE2</i>   | NM_130785    | rs16979870 | 6.88E-03 | pink | 0.09418 |
| <i>TRA16</i>   | NM_176880    | NA         | NA       | pink | 0.71087 |
| <i>TRA1P2</i>  | XR_000203    | NA         | NA       | pink | 0.09867 |
| <i>TRAF3</i>   | NM_003300    | rs7306825  | 1.60E-03 | pink | 0.42506 |
| <i>TRAPPC2</i> | NM_001011658 | NA         | NA       | pink | 0.16131 |
| <i>TRDMT1</i>  | NM_176083    | NA         | NA       | pink | 0.46433 |
| <i>TRIM2</i>   | NM_015271    | rs9288286  | 4.68E-03 | pink | 0.56745 |
| <i>TRIM22</i>  | NM_006074    | rs6926631  | 1.52E-02 | pink | 0.63992 |
| <i>TRIM36</i>  | NM_018700    | rs4613914  | 4.28E-04 | pink | 0.47490 |
| <i>TRIM69</i>  | NM_080745    | rs1078342  | 3.70E-02 | pink | 0.58996 |
| <i>TRPM8</i>   | NM_024080    | rs2885478  | 2.88E-02 | pink | 0.16618 |
| <i>TRSPAP1</i> | NM_017846    | NA         | NA       | pink | 0.40316 |
| <i>TSGA2</i>   | NM_080860    | NA         | NA       | pink | 0.27774 |
| <i>TSPAN13</i> | NM_014399    | rs1076113  | 1.77E-03 | pink | 0.47291 |
| <i>TSPAN17</i> | NM_130465    | rs9970167  | 8.19E-02 | pink | 0.30209 |
| <i>TSPAN33</i> | NM_178562    | rs7026747  | 1.56E-03 | pink | 0.41457 |
| <i>TTC18</i>   | NM_145170    | rs1374879  | 1.14E-02 | pink | 0.23383 |
| <i>TTC21A</i>  | NM_145755    | rs2638863  | 5.33E-03 | pink | 0.45616 |
| <i>TUBG1</i>   | XM_944510    | NA         | NA       | pink | 0.27621 |
| <i>TXNDC5</i>  | NM_030810    | rs10976618 | 7.71E-03 | pink | 0.73619 |
| <i>TXNDC9</i>  | NM_005783    | rs1572860  | 2.72E-02 | pink | 0.13496 |
| <i>U2AF1</i>   | NM_001025203 | rs10506255 | 3.21E-02 | pink | 0.06149 |
| <i>UAP1</i>    | NM_003115    | rs9985638  | 4.58E-02 | pink | 0.34686 |
| <i>UBC</i>     | NM_021009    | rs7893717  | 1.11E-01 | pink | 0.36134 |
| <i>UBE2C</i>   | NM_181802    | rs7284581  | 6.72E-03 | pink | 0.27653 |
| <i>UBE2D3</i>  | NM_181892    | rs28253    | 2.88E-02 | pink | 0.06997 |
| <i>UBE2I</i>   | NM_194261    | rs10809917 | 2.22E-03 | pink | 0.18252 |
| <i>UBE2L3</i>  | NM_198157    | NA         | NA       | pink | 0.21049 |
| <i>UCK2</i>    | NM_012474    | rs2814472  | 9.71E-03 | pink | 0.93190 |
| <i>UCN</i>     | NM_003353    | rs10506018 | 4.81E-03 | pink | 0.33535 |
| <i>UFD1L</i>   | NM_001035247 | rs2824335  | 1.12E-02 | pink | 0.36679 |
| <i>UHMK1</i>   | NM_175866    | rs2962393  | 4.97E-03 | pink | 0.38652 |
| <i>ULK2</i>    | NM_014683    | rs12517159 | 8.64E-04 | pink | 0.18050 |
| <i>UNC5D</i>   | NM_080872    | rs2701516  | 1.79E-04 | pink | 0.59180 |
| <i>UPF2</i>    | NM_080599    | rs1975349  | 2.68E-03 | pink | 0.03235 |
| <i>URB</i>     | NM_199511    | NA         | NA       | pink | 0.34160 |
| <i>URB</i>     | NM_199512    | NA         | NA       | pink | 0.07455 |
| <i>USP13</i>   | NM_003940    | rs2584401  | 3.22E-02 | pink | 0.32940 |
| <i>USP48</i>   | NM_001032730 | rs6452027  | 7.50E-04 | pink | 0.12273 |

Supplementary Table 6

|                |              |            |          |      |         |
|----------------|--------------|------------|----------|------|---------|
| <i>USP53</i>   | NM_019050    | rs798997   | 2.68E-02 | pink | 0.33985 |
| <i>USP6</i>    | NM_004505    | rs6053063  | 3.84E-05 | pink | 0.02184 |
| <i>UTP15</i>   | NM_032175    | rs7099452  | 2.00E-02 | pink | 0.25481 |
| <i>VAPA</i>    | NM_003574    | rs1557978  | 1.34E-02 | pink | 0.61253 |
| <i>VARS</i>    | NM_006295    | rs1951688  | 5.61E-03 | pink | 0.12758 |
| <i>VEZT</i>    | NM_017599    | rs499927   | 6.51E-03 | pink | 0.02827 |
| <i>VIP</i>     | NM_194435    | rs3757070  | 4.09E-03 | pink | 0.28342 |
| <i>WDR17</i>   | NM_181265    | rs1921481  | 1.01E-02 | pink | 0.16216 |
| <i>WDR19</i>   | NM_025132    | rs1393109  | 1.17E-03 | pink | 0.92698 |
| <i>WDR23</i>   | NM_025230    | NA         | NA       | pink | 0.70168 |
| <i>WDR33</i>   | NM_001006623 | rs339085   | 1.84E-02 | pink | 0.42924 |
| <i>WDR4</i>    | NM_033661    | rs16830039 | 2.16E-02 | pink | 0.36438 |
| <i>WDR46</i>   | NM_005452    | rs1187061  | 9.45E-03 | pink | 0.93498 |
| <i>WDR49</i>   | NM_178824    | rs12530468 | 3.15E-03 | pink | 0.42544 |
| <i>WDR5</i>    | NM_017588    | rs10268066 | 2.35E-02 | pink | 0.34954 |
| <i>WDR51A</i>  | NM_015426    | NA         | NA       | pink | 0.93065 |
| <i>WDR55</i>   | NM_017706    | rs4727011  | 2.87E-02 | pink | 0.67758 |
| <i>WDR62</i>   | NM_173636    | rs7955255  | 1.45E-03 | pink | 0.25623 |
| <i>WDR74</i>   | XM_936269    | NA         | NA       | pink | 0.61199 |
| <i>WDSUB1</i>  | NM_152528    | rs409359   | 1.64E-02 | pink | 0.57476 |
| <i>WHSC1</i>   | NM_007331    | rs1331297  | 4.26E-03 | pink | 0.51894 |
| <i>WIPF1</i>   | NM_001077269 | rs11939600 | 2.09E-02 | pink | 0.14447 |
| <i>WSB1</i>    | NM_134264    | NA         | NA       | pink | 0.10564 |
| <i>XPO4</i>    | NM_022459    | rs4982360  | 8.06E-04 | pink | 0.02911 |
| <i>XPOT</i>    | NM_007235    | rs10274542 | 2.63E-02 | pink | 0.43529 |
| <i>YTHDC1</i>  | NM_133370    | rs12891349 | 1.26E-02 | pink | 0.27452 |
| <i>ZADH1</i>   | NM_152444    | NA         | NA       | pink | 0.26816 |
| <i>ZBTB16</i>  | NM_006006    | rs11259844 | 3.54E-04 | pink | 0.32115 |
| <i>ZBTB7B</i>  | NM_015872    | rs17428    | 3.35E-03 | pink | 0.34696 |
| <i>ZBTB8OS</i> | NM_178547    | rs896503   | 3.28E-03 | pink | 0.19853 |
| <i>ZDHHC1</i>  | NM_013304    | rs11936348 | 6.95E-03 | pink | 0.61159 |
| <i>ZDHHC2</i>  | NM_016353    | rs2959618  | 1.92E-03 | pink | 0.15744 |
| <i>ZFHX4</i>   | NM_024721    | rs8003641  | 2.25E-03 | pink | 0.22560 |
| <i>ZKSCAN1</i> | NM_003439    | rs17418706 | 1.67E-04 | pink | 0.14448 |
| <i>ZMAT1</i>   | NM_032441    | NA         | NA       | pink | 0.15454 |
| <i>ZMYND10</i> | NM_015896    | rs2143725  | 1.37E-02 | pink | 0.15882 |
| <i>ZNF174</i>  | NM_003450    | rs7060694  | 6.36E-03 | pink | 0.26037 |
| <i>ZNF179</i>  | NM_007148    | NA         | NA       | pink | 0.33726 |
| <i>ZNF224</i>  | NM_013398    | rs17722373 | 1.53E-03 | pink | 0.21445 |
| <i>ZNF239</i>  | NM_005674    | rs10506255 | 3.21E-02 | pink | 0.65120 |
| <i>ZNF334</i>  | NM_018102    | rs6932104  | 1.35E-02 | pink | 0.35521 |
| <i>ZNF342</i>  | NM_145288    | NA         | NA       | pink | 0.83569 |
| <i>ZNF367</i>  | NM_153695    | rs4905752  | 8.91E-04 | pink | 0.05464 |
| <i>ZNF418</i>  | NM_133460    | rs11520658 | 8.13E-03 | pink | 0.14788 |
| <i>ZNF433</i>  | NM_152602    | NA         | NA       | pink | 0.68862 |
| <i>ZNF441</i>  | NM_152355    | rs1296025  | 4.06E-03 | pink | 0.65458 |
| <i>ZNF502</i>  | NM_033210    | rs7904676  | 8.30E-03 | pink | 0.64993 |
| <i>ZNF509</i>  | NM_145291    | NA         | NA       | pink | 0.11279 |
| <i>ZNF599</i>  | NM_001007248 | rs10483056 | 1.71E-03 | pink | 0.56152 |

Supplementary Table 6

|                  |              |            |          |        |         |
|------------------|--------------|------------|----------|--------|---------|
| <i>ZNF606</i>    | NM_025027    | rs2150031  | 6.09E-04 | pink   | 0.77299 |
| <i>ZNF651</i>    | NM_145166    | NA         | NA       | pink   | 0.33159 |
| <i>ZNF695</i>    | NM_020394    | rs2379189  | 3.73E-01 | pink   | 0.18171 |
| <i>ZNF702</i>    | NM_024924    | NA         | NA       | pink   | 0.06068 |
| <i>ZNF704</i>    | NM_001033723 | rs1079242  | 1.06E-03 | pink   | 0.56575 |
| <i>ZNF767</i>    | NM_024910    | NA         | NA       | pink   | 0.08762 |
| <i>ZNF91</i>     | NM_003430    | rs10757418 | 9.84E-04 | pink   | 0.80470 |
| <i>ZWINT</i>     | NM_032997    | rs32617    | 1.30E-02 | pink   | 0.66565 |
| <i>ALPK3</i>     | NM_020778    | rs4662179  | 9.26E-03 | purple | 0.12458 |
| <i>ATF3</i>      | NM_004024    | NA         | NA       | purple | 0.42855 |
| <i>ATP11B</i>    | NM_014616    | rs13001300 | 2.43E-03 | purple | 0.57494 |
| <i>ATP7B</i>     | NM_000053    | rs6063947  | 7.02E-03 | purple | 0.85018 |
| <i>AZGP1</i>     | NM_001185    | rs4919128  | 3.53E-03 | purple | 0.66601 |
| <i>BMP8B</i>     | NM_001720    | rs16869484 | 1.46E-02 | purple | 0.75441 |
| <i>C16orf50</i>  | NM_032269    | NA         | NA       | purple | 1.00000 |
| <i>CCNB1IP1</i>  | NM_182852    | rs11739635 | 3.90E-03 | purple | 0.67615 |
| <i>CD1E</i>      | NM_030893    | rs11712650 | 8.51E-03 | purple | 0.19772 |
| <i>CLDN20</i>    | NM_001001346 | rs2209354  | 9.46E-04 | purple | 0.28249 |
| <i>DPCR1</i>     | NM_080870    | rs749767   | 8.95E-04 | purple | 0.44834 |
| <i>ERO1LB</i>    | NM_019891    | rs3768105  | 1.92E-01 | purple | 0.23944 |
| <i>FLJ21159</i>  | NM_024826    | NA         | NA       | purple | 0.23284 |
| <i>FOLR1</i>     | NM_016730    | NA         | NA       | purple | 0.37593 |
| <i>FXN</i>       | NM_181425    | rs13416248 | 8.59E-03 | purple | 0.89791 |
| <i>GJC1</i>      | NM_152219    | NA         | NA       | purple | 0.39568 |
| <i>HOOK3</i>     | NM_032410    | rs1981008  | 4.49E-03 | purple | 0.43244 |
| <i>HOXB8</i>     | NM_024016    | rs6447330  | 3.43E-03 | purple | 0.89037 |
| <i>HOXD3</i>     | NM_006898    | rs12760731 | 1.07E-01 | purple | 0.75548 |
| <i>IGFL3</i>     | NM_207393    | rs10140352 | 3.80E-03 | purple | 0.34754 |
| <i>LHFPL3</i>    | NM_199000    | rs13221774 | 7.15E-04 | purple | 0.23007 |
| <i>LOC399898</i> | NM_001013666 | NA         | NA       | purple | 0.28604 |
| <i>LOC653281</i> | XM_926684    | NA         | NA       | purple | 0.28262 |
| <i>MAPK15</i>    | NM_139021    | rs10935500 | 4.88E-02 | purple | 0.61730 |
| <i>MUC7</i>      | NM_152291    | rs7960038  | 1.80E-02 | purple | 0.59620 |
| <i>MYOZ1</i>     | NM_021245    | rs10429583 | 2.16E-02 | purple | 0.26851 |
| <i>OR2H2</i>     | NM_007160    | rs9508667  | 1.17E-02 | purple | 0.95621 |
| <i>PGAM5</i>     | NM_138575    | rs12521868 | 4.28E-02 | purple | 0.25014 |
| <i>PLA2G10</i>   | NM_003561    | rs9821143  | 9.37E-03 | purple | 0.28904 |
| <i>RSPO3</i>     | NM_032784    | rs1683723  | 1.85E-02 | purple | 0.64813 |
| <i>SCGB1C1</i>   | NM_145651    | rs727056   | 2.01E-03 | purple | 0.15093 |
| <i>SEMG1</i>     | NM_003007    | rs2239770  | 4.74E-03 | purple | 0.80910 |
| <i>SHOX2</i>     | NM_006884    | rs10455771 | 5.65E-02 | purple | 0.38830 |
| <i>SIGLEC12</i>  | NM_053003    | rs1543109  | 1.80E-02 | purple | 0.20276 |
| <i>TNXA</i>      | NR_001284    | rs12454634 | 3.11E-03 | purple | 0.17427 |
| <i>TPP2</i>      | NM_003291    | rs11720318 | 5.23E-04 | purple | 0.83606 |
| <i>ZAP70</i>     | NM_001079    | rs7517899  | 9.97E-03 | purple | 0.70083 |
| <i>ZNF611</i>    | NM_030972    | rs10747826 | 2.33E-02 | purple | 0.18253 |
| <i>ACCN3</i>     | NM_020322    | rs496220   | 6.69E-02 | red    | 0.73656 |
| <i>ADAMDEC1</i>  | NM_014479    | rs11074618 | 5.03E-03 | red    | 0.50357 |
| <i>ADIPOQ</i>    | NM_004797    | rs172818   | 1.03E-03 | red    | 0.45681 |

Supplementary Table 6

|                  |              |            |          |     |         |        |
|------------------|--------------|------------|----------|-----|---------|--------|
| <i>AKT3</i>      | NM_181690    | rs10927067 | 1.47E-02 | red | 0.29553 |        |
| <i>ALPPL2</i>    | NM_031313    | rs12067652 | 2.30E-01 | red | 0.48847 |        |
| <i>ANKZF1</i>    | NM_018089    | rs10799    | 3.21E-02 | red | 0.30063 |        |
| <i>B3GALT7</i>   | NM_198540    | NA         | NA       | red | 0.20560 |        |
| <i>C14orf115</i> | NM_018228    | NA         | NA       | red | 0.16187 |        |
| <i>C14orf68</i>  | NM_207117    | NA         | NA       | red | 0.85632 |        |
| <i>CA9</i>       | NM_001216    | rs286435   | 2.29E-03 | red | 0.37429 |        |
| <i>CACNA1I</i>   | NM_001003406 | rs1858740  | 5.59E-04 | red | 0.65818 |        |
| <i>CCDC60</i>    | NM_178499    | rs3802881  | 9.06E-03 | red | 0.83218 |        |
| <i>CEP290</i>    | NM_025114    | rs4533056  | 9.53E-03 | red | 0.64454 |        |
| <i>DMD</i>       | NM_004010    | NA         | NA       | red | 0.38775 |        |
| <i>DNAJC5G</i>   | NM_173650    | rs2199664  | 3.80E-02 | red | 0.33010 |        |
| <i>DUSP13</i>    | NM_016364    | rs830786   | 4.12E-03 | red | 0.20443 |        |
| <i>ELA3B</i>     | NM_007352    | NA         | NA       | red | 0.45065 |        |
| <i>FCGR3B</i>    | NM_000570    | rs409359   | 1.64E-02 | red | 0.74214 |        |
| <i>FLJ30934</i>  | NM_152760    | NA         | NA       | red | 0.49266 |        |
| <i>FLJ35725</i>  | NM_001031742 | NA         | NA       | red | 0.35330 |        |
| <i>FLJ36779</i>  | NM_152571    | NA         | NA       | red | 0.82762 |        |
| <i>GCM1</i>      | NM_003643    | rs12910429 | 9.21E-03 | red | 0.27079 |        |
| <i>GPR34</i>     | NM_001033513 | NA         | NA       | red | 0.22272 |        |
| <i>HCN4</i>      | NM_005477    | rs7174643  | 9.97E-04 | red | 0.44599 |        |
| <i>HLA-DQB2</i>  | NM_182549    | NA         | NA       | red | 0.60524 |        |
| <i>HOXA6</i>     | NM_024014    | rs9554090  | 6.33E-03 | red | 0.17869 |        |
| <i>HOXC6</i>     | NM_153693    | rs37787    | 7.65E-03 | red | 0.65936 |        |
| <i>IL16</i>      | NM_172217    | rs7171517  | 2.38E-03 | red | 0.38234 |        |
| <i>IL1F5</i>     | NM_173170    | rs7329468  | 3.74E-03 | red | 0.72351 |        |
| <i>IL1RL1</i>    | NM_016232    | rs7306825  | 1.60E-03 | red | 0.07698 |        |
| <i>IL21R</i>     | NM_181078    | rs1555453  | 3.00E-03 | red | 0.12930 |        |
| <i>ISLR</i>      | NM_201526    | rs543827   | 1.06E-02 | red | 0.34929 |        |
| <i>KCND2</i>     | NM_012281    | rs3794208  | 3.30E-03 | red | 0.25748 |        |
| <i>KIAA1920</i>  | NM_052919    | NA         | NA       | red | 0.55533 |        |
| <i>KIF6</i>      | NM_145027    | rs9369119  | 6.13E-04 | red | 0.48336 |        |
| <i>KLK1</i>      | NM_002257    | rs1023880  | 1.62E-03 | red | 0.47321 |        |
| <i>KLK11</i>     | NM_006853    | rs1485677  | 4.53E-03 | red | 0.46870 |        |
| <i>KRT17</i>     | NM_000422    | rs7146299  | 1.13E-02 | red | 0.12637 |        |
| <i>KRT3</i>      | NM_057088    | rs4711976  | 1.35E-02 | red | 0.38650 |        |
| <i>KRTHB4</i>    | NM_033045    | NA         | NA       | red | 0.61349 |        |
| <i>L3MBTL3</i>   | NM_001007102 | rs6486676  | 1.41E-03 | red | 0.73675 |        |
| <i>LOC51149</i>  | NM_001017987 | NA         | NA       | red | 0.49056 |        |
| <i>MRAP</i>      | NM_206898    | rs10971038 | 1.71E-02 | red | 0.47685 |        |
| <i>OAS1</i>      | NM_002534    | rs1361133  | 1.25E-02 | red | 0.57386 |        |
| <i>OPRM1</i>     | NM_001008505 | rs9288286  | 4.68E-03 | red | 1.00000 | autism |
| <i>OR4C13</i>    | NM_001001955 | rs10495983 | 2.57E-03 | red | 0.48377 |        |
| <i>OR4K13</i>    | NM_001004714 | rs367842   | 1.13E-05 | red | 0.20813 |        |
| <i>OR52N2</i>    | NM_001005174 | rs16864085 | 1.45E-02 | red | 0.25612 |        |
| <i>OR8D1</i>     | NM_001002917 | rs972931   | 3.24E-02 | red | 0.17241 |        |
| <i>PAGE4</i>     | NM_007003    | NA         | NA       | red | 0.18610 |        |
| <i>PAX9</i>      | NM_006194    | rs4833144  | 1.24E-04 | red | 0.68800 |        |
| <i>PECAM1</i>    | NM_000442    | rs10411879 | 5.55E-04 | red | 0.46450 |        |

Supplementary Table 6

|                   |                 |            |          |           |         |
|-------------------|-----------------|------------|----------|-----------|---------|
| <i>PTPN5</i>      | NM_001039970    | rs4721719  | 7.51E-03 | red       | 0.09220 |
| <i>RBP5</i>       | NM_031491       | rs4689606  | 1.68E-04 | red       | 0.36831 |
| <i>S100A7L2</i>   | NM_001045479    | rs7781309  | 1.39E-02 | red       | 0.59127 |
| <i>SC4MOL</i>     | NM_001017369    | rs7698056  | 2.88E-04 | red       | 0.26453 |
| <i>SDPR</i>       | NM_004657       | rs6444517  | 1.72E-02 | red       | 0.64695 |
| <i>SIPA1L3</i>    | NM_015073       | rs8140396  | 3.46E-03 | red       | 0.49103 |
| <i>THSD4</i>      | NM_024817       | rs17087818 | 2.83E-05 | red       | 0.23979 |
| <i>TNFRSF9</i>    | NM_001561       | rs7703033  | 2.63E-03 | red       | 0.58094 |
| <i>TRPV3</i>      | NM_145068       | rs16844401 | 2.61E-03 | red       | 0.16899 |
| <i>USH3A</i>      | NM_052995       | NA         | NA       | red       | 0.86971 |
| <i>VN1R2</i>      | NM_173856       | rs10515989 | 6.29E-03 | red       | 0.60110 |
| <i>WISP2</i>      | NM_003881       | rs4812854  | 4.78E-03 | red       | 0.16752 |
| <i>ZNF41</i>      | NM_007130       | NA         | NA       | red       | 0.72549 |
|                   | 7-Mar NM_005885 | NA         | NA       | royalblue | 0.62314 |
|                   | 5-Sep NM_080417 | NA         | NA       | royalblue | 0.53420 |
| <i>ABHD11</i>     | NM_148914       | NA         | NA       | royalblue | 0.44917 |
| <i>ABLIM1</i>     | NM_001003407    | rs1544155  | 1.48E-04 | royalblue | 0.38318 |
| <i>ABLIM1</i>     | NM_006720       | rs6908592  | 2.62E-03 | royalblue | 0.57042 |
| <i>ACAT2</i>      | NM_005891       | rs9833196  | 8.31E-04 | royalblue | 0.30296 |
| <i>ACCN4</i>      | NM_018674       | rs4846355  | 1.02E-01 | royalblue | 0.33317 |
| <i>ACCN4</i>      | NM_018674       | rs4846355  | 1.02E-01 | royalblue | 0.25837 |
| <i>ACOT12</i>     | NM_130767       | rs1859678  | 9.69E-03 | royalblue | 0.92869 |
| <i>ACOT9</i>      | NM_001033583    | NA         | NA       | royalblue | 0.91843 |
| <i>ACOT9</i>      | NM_001037171    | NA         | NA       | royalblue | 0.36424 |
| <i>ACSS2</i>      | NM_001076552    | rs1869824  | 8.47E-04 | royalblue | 0.85620 |
| <i>ACSS2</i>      | NM_018677       | rs1869824  | 8.47E-04 | royalblue | 0.21343 |
| <i>ACSS2</i>      | NM_139274       | NA         | NA       | royalblue | 0.85220 |
| <i>ACVR1</i>      | NM_001105       | rs929779   | 3.80E-03 | royalblue | 0.83557 |
| <i>ADAM12</i>     | NM_003474       | rs9491849  | 4.77E-05 | royalblue | 0.41986 |
| <i>ADAM12</i>     | NM_021641       | rs9491849  | 4.77E-05 | royalblue | 0.29133 |
| <i>ADAMTS14</i>   | NM_139155       | rs1727668  | 5.62E-03 | royalblue | 0.35509 |
| <i>ADAMTS9</i>    | NM_182920       | rs7188225  | 1.11E-03 | royalblue | 0.87964 |
| <i>ADH4</i>       | NM_000670       | rs12428596 | 6.52E-03 | royalblue | 0.26104 |
| <i>ADPN</i>       | NM_025225       | NA         | NA       | royalblue | 0.30853 |
| <i>AFF3</i>       | NM_002285       | rs10509714 | 1.22E-03 | royalblue | 0.63149 |
| <i>AFTIPHILIN</i> | NM_203437       | rs8052896  | 8.45E-03 | royalblue | 0.55517 |
| <i>AIFM1</i>      | NM_145813       | NA         | NA       | royalblue | 0.82104 |
| <i>AK5</i>        | NM_012093       | rs17100458 | 1.90E-03 | royalblue | 0.73681 |
| <i>AK5</i>        | NM_174858       | rs17100458 | 1.90E-03 | royalblue | 0.19427 |
| <i>ALDH16A1</i>   | NM_153329       | rs11003452 | 1.17E-02 | royalblue | 0.37323 |
| <i>ALDH1A2</i>    | NM_170696       | rs1023880  | 1.62E-03 | royalblue | 0.43878 |
| <i>ALKBH8</i>     | NM_138775       | rs803520   | 1.94E-02 | royalblue | 0.56204 |
| <i>ALPL</i>       | NM_000478       | rs2443768  | 1.63E-03 | royalblue | 0.66470 |
| <i>ALS2CR4</i>    | NM_152388       | rs1914261  | 2.57E-01 | royalblue | 0.81712 |
| <i>AMBN</i>       | NM_016519       | rs6995985  | 6.34E-03 | royalblue | 0.81437 |
| <i>AMBN</i>       | NM_016519       | rs6995985  | 6.34E-03 | royalblue | 0.90731 |
| <i>AMD1</i>       | NM_001033059    | rs4627009  | 4.46E-03 | royalblue | 0.44338 |
| <i>AMD1</i>       | NM_001634       | rs4627009  | 4.46E-03 | royalblue | 0.67615 |
| <i>AMH</i>        | NM_000479       | rs7127900  | 4.58E-03 | royalblue | 0.54345 |

epilepsy

Supplementary Table 6

|                 |              |            |          |           |         |
|-----------------|--------------|------------|----------|-----------|---------|
| <i>ANGPT2</i>   | NM_001147    | rs1428986  | 1.31E-03 | royalblue | 0.30514 |
| <i>ANKDD1A</i>  | NM_182703    | rs10507697 | 7.69E-03 | royalblue | 0.64697 |
| <i>ANKRD12</i>  | NM_015208    | rs293184   | 3.31E-03 | royalblue | 0.48739 |
| <i>ANKRD34</i>  | NM_001039888 | NA         | NA       | royalblue | 0.34318 |
| <i>ANKRD38</i>  | NM_181712    | NA         | NA       | royalblue | 0.67672 |
| <i>ANKRD39</i>  | NM_016466    | rs879311   | 1.08E-02 | royalblue | 0.35219 |
| <i>ANKRD44</i>  | NM_153697    | rs7426655  | 4.79E-03 | royalblue | 0.05697 |
| <i>ANKRD50</i>  | NM_020337    | rs3935197  | 1.44E-03 | royalblue | 0.57433 |
| <i>ANKRD9</i>   | NM_152326    | rs7631720  | 4.06E-03 | royalblue | 0.75073 |
| <i>ANKS1B</i>   | NM_020140    | rs1474620  | 1.64E-03 | royalblue | 0.71703 |
| <i>AP3B2</i>    | NM_004644    | rs6473199  | 6.57E-03 | royalblue | 0.39892 |
| <i>APBB3</i>    | NM_006051    | rs2318331  | 2.42E-02 | royalblue | 0.39332 |
| <i>APBB3</i>    | NM_133173    | rs2318331  | 2.42E-02 | royalblue | 0.38144 |
| <i>APC2</i>     | NM_005883    | rs1514687  | 1.83E-03 | royalblue | 0.60668 |
| <i>APITD1</i>   | NM_199295    | NA         | NA       | royalblue | 0.43506 |
| <i>APOE</i>     | NM_000041    | rs12196609 | 2.43E-02 | royalblue | 0.90134 |
| <i>APOL4</i>    | NM_030643    | rs13205210 | 8.21E-03 | royalblue | 0.57276 |
| <i>APRT</i>     | NM_000485    | rs9300794  | 6.56E-03 | royalblue | 0.83670 |
| <i>ARHGAP20</i> | NM_020809    | rs12677646 | 1.51E-03 | royalblue | 0.79214 |
| <i>ARHGAP29</i> | NM_004815    | rs7316331  | 1.99E-03 | royalblue | 0.11492 |
| <i>ARID3A</i>   | NM_005224    | rs570869   | 9.34E-03 | royalblue | 0.64512 |
| <i>ARL4D</i>    | NM_001661    | rs1560422  | 1.24E-03 | royalblue | 0.50555 |
| <i>ARL9</i>     | NM_206919    | rs890632   | 1.36E-03 | royalblue | 0.60740 |
| <i>ARPP-21</i>  | NM_001025068 | NA         | NA       | royalblue | 0.38316 |
| <i>ASB6</i>     | NM_177999    | rs3780695  | 1.95E-02 | royalblue | 0.53994 |
| <i>ASB9</i>     | NM_024087    | NA         | NA       | royalblue | 0.45685 |
| <i>ASCC3L1</i>  | NM_014014    | NA         | NA       | royalblue | 0.72491 |
| <i>ASL</i>      | NM_001024943 | rs1471504  | 4.02E-03 | royalblue | 0.38366 |
| <i>ASL</i>      | NM_001024943 | rs1471504  | 4.02E-03 | royalblue | 0.34643 |
| <i>ASTN2</i>    | NM_014010    | rs1688615  | 1.33E-03 | royalblue | 0.67085 |
| <i>ATAD3B</i>   | NM_031921    | rs1514687  | 1.83E-03 | royalblue | 0.38227 |
| <i>ATBF1</i>    | NM_006885    | NA         | NA       | royalblue | 0.52571 |
| <i>ATIC</i>     | NM_004044    | rs10495069 | 1.05E-01 | royalblue | 0.78957 |
| <i>ATP2B4</i>   | NM_001684    | rs16852152 | 2.74E-02 | royalblue | 0.84098 |
| <i>ATP5G1</i>   | NM_005175    | rs4942369  | 8.99E-03 | royalblue | 0.19401 |
| <i>ATRN</i>     | NM_139322    | rs7883545  | 2.53E-04 | royalblue | 0.22034 |
| <i>ATRNL1</i>   | NM_207303    | rs4920888  | 1.10E-03 | royalblue | 0.41546 |
| <i>AVEN</i>     | NM_020371    | rs2124748  | 3.20E-05 | royalblue | 0.29946 |
| <i>AVPI1</i>    | NM_021732    | rs17418706 | 1.67E-04 | royalblue | 0.78013 |
| <i>B3GNTL1</i>  | NM_001009905 | rs9309801  | 4.00E-03 | royalblue | 0.59725 |
| <i>BAMBI</i>    | NM_012342    | rs4893602  | 4.60E-04 | royalblue | 0.78251 |
| <i>BCAN</i>     | NM_021948    | rs11971331 | 3.29E-02 | royalblue | 0.97069 |
| <i>BCAT2</i>    | NM_001190    | rs12582022 | 5.55E-03 | royalblue | 0.83031 |
| <i>BCMO1</i>    | NM_017429    | rs2717536  | 5.33E-03 | royalblue | 0.53817 |
| <i>BGN</i>      | NM_001711    | NA         | NA       | royalblue | 0.92360 |
| <i>BIN3</i>     | NM_018688    | rs5970839  | 8.87E-03 | royalblue | 0.29658 |
| <i>BLCAP</i>    | NM_006698    | rs286411   | 7.75E-04 | royalblue | 0.64649 |
| <i>BMP2</i>     | NM_001200    | rs1054060  | 4.04E-03 | royalblue | 0.70123 |
| <i>BMPR2</i>    | NM_001204    | rs12025272 | 8.58E-02 | royalblue | 0.43390 |

Supplementary Table 6

|                  |              |            |          |           |         |        |
|------------------|--------------|------------|----------|-----------|---------|--------|
| <i>BOC</i>       | NM_033254    | rs786990   | 7.19E-03 | royalblue | 0.33972 |        |
| <i>BRI3BP</i>    | NM_080626    | rs2611428  | 4.50E-03 | royalblue | 0.25810 |        |
| <i>BRI3BP</i>    | XM_941876    | NA         | NA       | royalblue | 0.62885 |        |
| <i>BRWD1</i>     | NM_033656    | rs9369119  | 6.13E-04 | royalblue | 0.19962 |        |
| <i>BRWD1</i>     | NM_001007246 | rs5758108  | 8.73E-03 | royalblue | 0.77404 |        |
| <i>BSN</i>       | NM_003458    | rs7755833  | 2.55E-04 | royalblue | 0.81271 |        |
| <i>BST2</i>      | NM_004335    | rs5993462  | 2.74E-03 | royalblue | 0.49874 |        |
| <i>BTBD5</i>     | NM_017658    | NA         | NA       | royalblue | 0.41588 |        |
| <i>BTD</i>       | NM_000060    | rs2543154  | 1.88E-03 | royalblue | 0.55300 |        |
| <i>BUB1B</i>     | NM_001211    | rs1565866  | 9.24E-03 | royalblue | 0.40004 |        |
| <i>BUB3</i>      | NM_001007793 | rs2001966  | 5.62E-02 | royalblue | 0.48031 |        |
| <i>BZRAP1</i>    | NM_004758    | rs13235506 | 4.95E-03 | royalblue | 0.46976 | autism |
| <i>C10orf125</i> | NM_198472    | rs801553   | 5.73E-02 | royalblue | 0.91471 |        |
| <i>C10orf13</i>  | NM_152429    | NA         | NA       | royalblue | 0.84058 |        |
| <i>C10orf67</i>  | NM_153714    | rs2116227  | 5.35E-03 | royalblue | 0.71829 |        |
| <i>C10orf90</i>  | NM_001004298 | rs2255177  | 7.69E-04 | royalblue | 0.66534 |        |
| <i>C12orf24</i>  | NM_013300    | rs2273669  | 1.49E-02 | royalblue | 0.81819 |        |
| <i>C12orf28</i>  | NM_182530    | NA         | NA       | royalblue | 0.36816 |        |
| <i>C12orf34</i>  | NM_032829    | rs2676370  | 3.20E-04 | royalblue | 0.27136 |        |
| <i>C12orf46</i>  | NM_152321    | NA         | NA       | royalblue | 0.52989 |        |
| <i>C12orf48</i>  | NM_017915    | rs7584650  | 6.66E-03 | royalblue | 0.46954 |        |
| <i>C14orf126</i> | NM_080664    | rs11129434 | 4.41E-03 | royalblue | 0.43367 |        |
| <i>C14orf143</i> | NM_145231    | rs6551408  | 8.14E-03 | royalblue | 0.44807 |        |
| <i>C18orf22</i>  | NM_024805    | NA         | NA       | royalblue | 0.71061 |        |
| <i>C18orf34</i>  | NM_198995    | rs4308905  | 1.83E-04 | royalblue | 0.35961 |        |
| <i>C18orf51</i>  | NM_001044369 | NA         | NA       | royalblue | 0.94405 |        |
| <i>C18orf51</i>  | XM_058931    | NA         | NA       | royalblue | 0.96627 |        |
| <i>C19orf30</i>  | NM_174947    | NA         | NA       | royalblue | 0.76104 |        |
| <i>C1orf106</i>  | NM_018265    | rs2062847  | 1.59E-01 | royalblue | 0.60743 |        |
| <i>C1orf183</i>  | NM_019099    | rs11102329 | 4.76E-03 | royalblue | 0.26045 |        |
| <i>C1orf2</i>    | NM_006589    | NA         | NA       | royalblue | 0.77658 |        |
| <i>C1orf2</i>    | NM_198264    | NA         | NA       | royalblue | 0.25399 |        |
| <i>C1orf21</i>   | NM_030806    | rs2871262  | 2.86E-02 | royalblue | 0.72384 |        |
| <i>C1orf94</i>   | NM_032884    | rs6628850  | 7.17E-03 | royalblue | 0.84641 |        |
| <i>C1orf97</i>   | NM_032705    | NA         | NA       | royalblue | 0.15749 |        |
| <i>C1QBP</i>     | NM_001212    | rs2074437  | 4.33E-02 | royalblue | 0.91800 |        |
| <i>C1QTNF5</i>   | NM_015645    | rs13129382 | 3.82E-02 | royalblue | 0.91852 |        |
| <i>C1R</i>       | NM_001733    | rs7031605  | 3.14E-03 | royalblue | 0.92449 |        |
| <i>C1S</i>       | NM_001734    | rs7857570  | 5.91E-03 | royalblue | 0.95033 |        |
| <i>C1S</i>       | NM_201442    | rs7857570  | 5.91E-03 | royalblue | 0.86904 |        |
| <i>C20orf100</i> | NM_032883    | NA         | NA       | royalblue | 0.86124 |        |
| <i>C20orf58</i>  | NM_152864    | NA         | NA       | royalblue | 0.79905 |        |
| <i>C21orf127</i> | NM_013240    | rs4820853  | 9.72E-03 | royalblue | 0.45935 |        |
| <i>C21orf34</i>  | NM_001005732 | NA         | NA       | royalblue | 0.67229 |        |
| <i>C21orf56</i>  | NM_032261    | rs1374748  | 2.16E-03 | royalblue | 0.42694 |        |
| <i>C21orf63</i>  | NM_058187    | rs1958023  | 1.42E-03 | royalblue | 0.61237 |        |
| <i>C21orf7</i>   | NM_020152    | rs17509178 | 3.93E-03 | royalblue | 0.78122 |        |
| <i>C22orf16</i>  | NM_213720    | NA         | NA       | royalblue | 0.58891 |        |
| <i>C3AR1</i>     | NM_004054    | rs10795588 | 3.16E-02 | royalblue | 0.16996 |        |

Supplementary Table 6

|                 |              |            |          |           |         |        |
|-----------------|--------------|------------|----------|-----------|---------|--------|
| <i>C4orf18</i>  | NM_016613    | NA         | NA       | royalblue | 0.88906 |        |
| <i>C4orf18</i>  | NM_016613    | NA         | NA       | royalblue | 0.57418 |        |
| <i>C5orf16</i>  | NM_173828    | NA         | NA       | royalblue | 0.37042 |        |
| <i>C6orf139</i> | NM_018132    | NA         | NA       | royalblue | 0.10133 |        |
| <i>C6orf152</i> | NM_181714    | NA         | NA       | royalblue | 0.20877 |        |
| <i>C6orf26</i>  | NM_001039651 | rs4445     | 5.63E-03 | royalblue | 0.62074 |        |
| <i>C6orf32</i>  | NM_015864    | NA         | NA       | royalblue | 0.74839 |        |
| <i>C7orf24</i>  | NM_024051    | NA         | NA       | royalblue | 0.57478 |        |
| <i>C8orf13</i>  | NM_053279    | NA         | NA       | royalblue | 0.88052 |        |
| <i>C8orf34</i>  | NM_052958    | rs17086457 | 8.19E-04 | royalblue | 0.72733 |        |
| <i>C8orf58</i>  | NM_001013842 | rs7061317  | 7.69E-03 | royalblue | 0.15424 |        |
| <i>C9orf114</i> | NM_016390    | rs2997922  | 1.51E-03 | royalblue | 0.78983 |        |
| <i>C9orf127</i> | NM_016446    | NA         | NA       | royalblue | 0.84211 |        |
| <i>C9orf23</i>  | NM_148179    | rs13356779 | 8.15E-04 | royalblue | 0.41322 |        |
| <i>C9orf72</i>  | NM_018325    | rs10501086 | 2.08E-02 | royalblue | 0.44802 |        |
| <i>CA12</i>     | NM_001218    | rs1036244  | 6.36E-03 | royalblue | 0.70180 |        |
| <i>CA8</i>      | NM_004056    | rs6090305  | 8.03E-03 | royalblue | 0.22208 |        |
| <i>CACNB2</i>   | NM_201572    | rs2717756  | 3.20E-04 | royalblue | 0.27219 |        |
| <i>CACNB2</i>   | NM_201572    | rs2717756  | 3.20E-04 | royalblue | 0.71665 |        |
| <i>CACNG3</i>   | NM_006539    | rs4800869  | 8.40E-04 | royalblue | 0.55097 |        |
| <i>CALB2</i>    | NM_001740    | rs12506592 | 2.82E-02 | royalblue | 0.94242 |        |
| <i>CALB2</i>    | NM_007088    | rs12506592 | 2.82E-02 | royalblue | 0.25719 |        |
| <i>CAMK1</i>    | NM_003656    | rs12774125 | 7.78E-04 | royalblue | 0.52884 |        |
| <i>CAMK1D</i>   | NM_020397    | rs10511576 | 6.01E-05 | royalblue | 0.29498 |        |
| <i>CASP7</i>    | NM_033338    | rs546464   | 1.13E-03 | royalblue | 0.64427 |        |
| <i>CASP7</i>    | NM_033340    | rs546464   | 1.13E-03 | royalblue | 0.14574 |        |
| <i>CASQ1</i>    | NM_001231    | rs929779   | 3.80E-03 | royalblue | 0.59161 |        |
| <i>CBFA2T2</i>  | NM_005093    | rs1902334  | 5.48E-04 | royalblue | 0.62024 |        |
| <i>CBS</i>      | NM_000071    | rs4802256  | 1.44E-02 | royalblue | 0.66472 | autism |
| <i>CCDC22</i>   | NM_014008    | NA         | NA       | royalblue | 0.15599 |        |
| <i>CCDC34</i>   | NM_030771    | rs1555453  | 3.00E-03 | royalblue | 0.77102 |        |
| <i>CCDC34</i>   | NM_030771    | rs1555453  | 3.00E-03 | royalblue | 0.60335 |        |
| <i>CCDC58</i>   | NM_001017928 | rs701034   | 9.69E-03 | royalblue | 0.28374 |        |
| <i>CCNE1</i>    | NM_001238    | rs6457797  | 1.34E-02 | royalblue | 0.19184 |        |
| <i>CCT6A</i>    | NM_001762    | rs12058859 | 5.70E-03 | royalblue | 0.22851 |        |
| <i>CD24</i>     | NM_013230    | NA         | NA       | royalblue | 0.91966 |        |
| <i>CD276</i>    | XM_945867    | NA         | NA       | royalblue | 0.24603 |        |
| <i>CD2AP</i>    | NM_012120    | rs10165893 | 7.51E-04 | royalblue | 0.57657 |        |
| <i>CD59</i>     | NM_203329    | rs8093306  | 4.11E-03 | royalblue | 0.50071 |        |
| <i>CD8A</i>     | NM_001768    | rs6662699  | 5.22E-03 | royalblue | 0.41779 |        |
| <i>CD8A</i>     | NM_171827    | rs6662699  | 5.22E-03 | royalblue | 0.50880 |        |
| <i>CD9</i>      | NM_001769    | rs872460   | 8.34E-03 | royalblue | 0.51542 |        |
| <i>CDC42EP4</i> | NM_012121    | rs11620883 | 6.07E-04 | royalblue | 0.50203 |        |
| <i>CDC6</i>     | NM_001254    | rs12053698 | 8.68E-04 | royalblue | 0.42863 |        |
| <i>CDC7</i>     | NM_003503    | rs1941436  | 5.56E-02 | royalblue | 0.38362 |        |
| <i>CDH1</i>     | NM_004360    | rs2137704  | 4.09E-03 | royalblue | 0.29972 |        |
| <i>CDK3</i>     | NM_001258    | rs6995985  | 6.34E-03 | royalblue | 0.21079 |        |
| <i>CDKL4</i>    | NM_001009565 | rs10888650 | 7.90E-04 | royalblue | 0.30461 |        |
| <i>CDKN1C</i>   | NM_000076    | rs11251532 | 3.96E-03 | royalblue | 0.34483 |        |



Supplementary Table 6

|                 |              |            |          |           |         |        |
|-----------------|--------------|------------|----------|-----------|---------|--------|
| <i>CDKN2C</i>   | NM_078626    | rs1341980  | 2.14E-02 | royalblue | 0.50936 |        |
| <i>CER1</i>     | NM_005454    | rs11794846 | 2.27E-02 | royalblue | 0.08675 |        |
| <i>CFI</i>      | NM_000204    | rs12637194 | 2.03E-02 | royalblue | 0.90432 |        |
| <i>CGI-96</i>   | NM_015703    | NA         | NA       | royalblue | 0.25343 |        |
| <i>CHEK2</i>    | NM_007194    | rs765709   | 5.76E-03 | royalblue | 0.38127 |        |
| <i>CHGB</i>     | NM_001819    | rs1836583  | 7.69E-03 | royalblue | 0.89412 |        |
| <i>CHRFAM7A</i> | NM_139320    | rs1331894  | 6.96E-04 | royalblue | 0.50782 |        |
| <i>CHRNA1</i>   | NM_001039523 | rs1028304  | 7.65E-02 | royalblue | 0.34812 |        |
| <i>CHRNA7</i>   | NM_000746    | rs12407717 | 2.22E-03 | royalblue | 0.52302 | autism |
| <i>CHST8</i>    | NM_022467    | rs1393109  | 1.17E-03 | royalblue | 0.22129 |        |
| <i>CHST9</i>    | NM_031422    | rs16910190 | 5.48E-04 | royalblue | 0.90023 |        |
| <i>CKAP2</i>    | NM_018204    | rs1321507  | 7.52E-04 | royalblue | 0.19190 |        |
| <i>CKMT2</i>    | NM_001825    | rs10514740 | 8.57E-03 | royalblue | 0.12128 |        |
| <i>CLDN23</i>   | NM_194284    | rs1876611  | 4.93E-03 | royalblue | 0.90140 |        |
| <i>CLEC4A</i>   | NM_194448    | rs962731   | 6.93E-04 | royalblue | 0.20598 |        |
| <i>CLSTN2</i>   | NM_022131    | rs1864003  | 3.42E-04 | royalblue | 0.67426 |        |
| <i>CLU</i>      | NM_001831    | rs11074865 | 5.19E-02 | royalblue | 0.37132 |        |
| <i>CLU</i>      | NM_203339    | rs11074865 | 5.19E-02 | royalblue | 0.96971 |        |
| <i>CMTM7</i>    | NM_181472    | rs533873   | 1.94E-03 | royalblue | 0.24165 |        |
| <i>CMTM8</i>    | NM_178868    | rs5927970  | 8.70E-04 | royalblue | 0.27287 |        |
| <i>CNGA3</i>    | NM_001298    | rs12789711 | 7.81E-03 | royalblue | 0.46681 |        |
| <i>CNGA3</i>    | NM_001298    | rs12789711 | 7.81E-03 | royalblue | 0.52351 |        |
| <i>CNTFR</i>    | NM_147164    | rs558317   | 2.00E-04 | royalblue | 0.29252 |        |
| <i>CNTFR</i>    | NM_147164    | rs558317   | 2.00E-04 | royalblue | 0.87817 |        |
| <i>CNTN6</i>    | NM_014461    | rs4640842  | 1.68E-04 | royalblue | 0.61464 |        |
| <i>COL16A1</i>  | NM_001856    | rs17508455 | 4.07E-04 | royalblue | 0.35194 |        |
| <i>COL22A1</i>  | NM_152888    | rs6892936  | 1.10E-03 | royalblue | 0.47187 |        |
| <i>COL27A1</i>  | NM_032888    | rs763229   | 6.19E-04 | royalblue | 0.40790 |        |
| <i>COL9A2</i>   | NM_001852    | rs2285427  | 1.31E-03 | royalblue | 0.48782 |        |
| <i>COL9A3</i>   | NM_001853    | rs4784182  | 1.09E-02 | royalblue | 0.58005 |        |
| <i>COLEC12</i>  | NM_130386    | rs4742002  | 5.89E-05 | royalblue | 0.91567 |        |
| <i>CORO2B</i>   | NM_006091    | rs11077554 | 5.15E-03 | royalblue | 0.41385 |        |
| <i>CPLX1</i>    | NM_006651    | rs11908221 | 9.26E-03 | royalblue | 0.87092 |        |
| <i>CPLX2</i>    | NM_006650    | rs11939600 | 2.09E-02 | royalblue | 0.46613 |        |
| <i>CPM</i>      | NM_001005502 | rs1550805  | 6.93E-03 | royalblue | 0.31842 |        |
| <i>CRABP2</i>   | NM_001878    | rs12621256 | 1.53E-03 | royalblue | 0.43776 |        |
| <i>CRB1</i>     | NM_201253    | rs1345529  | 2.04E-02 | royalblue | 0.85071 |        |
| <i>CRIM1</i>    | NM_016441    | rs752775   | 3.98E-03 | royalblue | 0.87108 |        |
| <i>CRIP1</i>    | NM_001311    | rs12370774 | 3.07E-02 | royalblue | 0.19404 |        |
| <i>CRISPLD1</i> | NM_031461    | rs1817182  | 7.07E-04 | royalblue | 0.63804 |        |
| <i>CRTAC1</i>   | NM_018058    | rs7169026  | 1.96E-03 | royalblue | 0.51373 |        |
| <i>CRY1</i>     | NM_004075    | rs6726474  | 3.39E-03 | royalblue | 0.37888 |        |
| <i>CRYM</i>     | NM_001888    | rs1105377  | 9.75E-03 | royalblue | 0.45487 |        |
| <i>CSEN</i>     | NM_013434    | rs6834248  | 4.90E-03 | royalblue | 0.55772 |        |
| <i>CSF1</i>     | NM_172212    | rs7398343  | 1.51E-03 | royalblue | 0.24150 |        |
| <i>CSF1R</i>    | NM_005211    | rs500294   | 1.40E-05 | royalblue | 0.43497 |        |
| <i>CSNK2A1</i>  | NM_177559    | rs4742002  | 5.89E-05 | royalblue | 0.24362 |        |
| <i>CSPG4</i>    | NM_001897    | rs6566045  | 1.95E-05 | royalblue | 0.43838 |        |
| <i>CSRP2</i>    | NM_001321    | rs2068434  | 1.57E-02 | royalblue | 0.83728 |        |

Supplementary Table 6

|                      |              |            |          |           |         |        |
|----------------------|--------------|------------|----------|-----------|---------|--------|
| <i>CSTF1</i>         | NM_001324    | rs17117895 | 8.40E-04 | royalblue | 0.13729 |        |
| <i>CTF8</i>          | NM_001040144 | NA         | NA       | royalblue | 0.12302 |        |
| <i>CTSB</i>          | NM_001908    | rs1296025  | 4.06E-03 | royalblue | 0.81106 |        |
| <i>CTSF</i>          | NM_003793    | rs2275998  | 8.05E-03 | royalblue | 0.95352 |        |
| <i>CTTN</i>          | NM_005231    | rs11931604 | 3.70E-02 | royalblue | 0.33801 |        |
| <i>CUGBP2</i>        | NM_001025076 | NA         | NA       | royalblue | 0.42852 |        |
| <i>CUL7</i>          | NM_014780    | rs1027413  | 2.09E-02 | royalblue | 0.33869 |        |
| <i>CUTL1</i>         | NM_001913    | NA         | NA       | royalblue | 0.17479 |        |
| <i>CYP1B1</i>        | NM_000104    | rs12194275 | 3.66E-03 | royalblue | 0.28707 |        |
| <i>DACT1</i>         | NM_016651    | rs3772985  | 1.16E-02 | royalblue | 0.73440 |        |
| <i>DACT1</i>         | NM_016651    | rs3772985  | 1.16E-02 | royalblue | 0.72263 |        |
| <i>DACT2</i>         | NM_214462    | rs1412788  | 3.28E-02 | royalblue | 0.67961 |        |
| <i>DAPK1</i>         | NM_004938    | rs6551408  | 8.14E-03 | royalblue | 0.49797 | autism |
| <i>DARC</i>          | NM_002036    | rs6921468  | 7.71E-02 | royalblue | 0.74199 |        |
| <i>DARS2</i>         | NM_018122    | rs2281486  | 1.90E-02 | royalblue | 0.50709 |        |
| <i>DAXX</i>          | NM_001350    | rs6462474  | 5.77E-03 | royalblue | 0.43801 |        |
| <i>DBC1</i>          | NM_014618    | rs7095989  | 5.20E-03 | royalblue | 0.94095 |        |
| <i>DBNDD1</i>        | NM_001042610 | rs2142195  | 2.46E-02 | royalblue | 0.76343 |        |
| <i>DCAMKL2</i>       | NM_001040260 | NA         | NA       | royalblue | 0.89316 |        |
| <i>DCAMKL2</i>       | NM_152619    | NA         | NA       | royalblue | 0.95253 |        |
| <i>DCBLD1</i>        | NM_173674    | rs6661142  | 5.24E-03 | royalblue | 0.62907 |        |
| <i>DCPS</i>          | NM_014026    | rs314961   | 1.16E-04 | royalblue | 0.26187 |        |
| <i>DDIT3</i>         | NM_004083    | rs991335   | 1.99E-02 | royalblue | 0.52828 |        |
| <i>DDX11</i>         | NM_004399    | rs221981   | 5.47E-03 | royalblue | 0.17823 |        |
| <i>DENND1A</i>       | NM_024820    | rs314946   | 7.77E-05 | royalblue | 0.14427 |        |
| <i>DERPC</i>         | NM_017804    | NA         | NA       | royalblue | 0.34078 |        |
| <i>DGKG</i>          | NM_001346    | rs1558910  | 1.32E-02 | royalblue | 0.47963 |        |
| <i>DHCR7</i>         | NM_001360    | rs13416248 | 8.59E-03 | royalblue | 0.64992 | autism |
| <i>DHDH</i>          | NM_014475    | rs12606138 | 6.48E-04 | royalblue | 0.45894 |        |
| <i>DHRS3</i>         | NM_004753    | rs1111059  | 2.46E-04 | royalblue | 0.96212 |        |
| <i>DIO3</i>          | NM_001362    | rs7986646  | 1.98E-02 | royalblue | 0.77304 |        |
| <i>DKFZP564J0863</i> | NM_015459    | NA         | NA       | royalblue | 0.67296 |        |
| <i>DKFZp586l1420</i> | NR_002186    | rs261946   | 1.85E-02 | royalblue | 0.64184 |        |
| <i>DLAT</i>          | NM_001931    | rs2949000  | 7.91E-03 | royalblue | 0.42570 |        |
| <i>DLX2</i>          | NM_004405    | rs17726121 | 6.87E-03 | royalblue | 0.51661 | autism |
| <i>DLX5</i>          | NM_005221    | rs10508029 | 2.42E-02 | royalblue | 0.76925 |        |
| <i>DNAH11</i>        | NM_003777    | rs12582514 | 2.64E-04 | royalblue | 0.34991 |        |
| <i>DNAH9</i>         | NM_001372    | rs2304402  | 1.24E-03 | royalblue | 0.31895 |        |
| <i>DNAH9</i>         | NM_001372    | rs2304402  | 1.24E-03 | royalblue | 0.07251 |        |
| <i>DNAJC1</i>        | NM_022365    | rs2473322  | 3.38E-03 | royalblue | 0.17057 |        |
| <i>DNAPT6</i>        | NM_015535    | NA         | NA       | royalblue | 0.72756 |        |
| <i>DNASE1L2</i>      | NM_001374    | rs4430511  | 1.16E-02 | royalblue | 0.13275 |        |
| <i>DOCK1</i>         | NM_001380    | rs674768   | 2.96E-03 | royalblue | 0.37648 |        |
| <i>DOCK11</i>        | NM_144658    | NA         | NA       | royalblue | 0.48236 |        |
| <i>DPAGT1</i>        | NM_001382    | rs7441935  | 5.88E-02 | royalblue | 0.27901 |        |
| <i>DSCR1L2</i>       | NM_013441    | NA         | NA       | royalblue | 0.17605 |        |
| <i>DSCR2</i>         | NM_003720    | NA         | NA       | royalblue | 0.41139 |        |
| <i>DSCR6</i>         | NM_018962    | rs218428   | 1.69E-02 | royalblue | 0.57819 |        |
| <i>DUSP23</i>        | NM_017823    | rs10081235 | 3.95E-02 | royalblue | 0.63842 |        |

Supplementary Table 6

|                 |              |            |          |           |         |
|-----------------|--------------|------------|----------|-----------|---------|
| <i>DUSP8</i>    | NM_004420    | rs2745580  | 1.20E-02 | royalblue | 0.57765 |
| <i>EBP</i>      | NM_006579    | NA         | NA       | royalblue | 0.86475 |
| <i>ECGF1</i>    | NM_001953    | NA         | NA       | royalblue | 0.35631 |
| <i>EDG2</i>     | NM_001401    | NA         | NA       | royalblue | 0.24875 |
| <i>EDN3</i>     | NM_207034    | rs1755834  | 1.03E-03 | royalblue | 0.74945 |
| <i>EFNB1</i>    | NM_004429    | NA         | NA       | royalblue | 0.65644 |
| <i>EHD2</i>     | NM_014601    | rs2257216  | 3.37E-03 | royalblue | 0.13834 |
| <i>EIF2AK4</i>  | NM_001013703 | rs4290385  | 3.28E-03 | royalblue | 0.60840 |
| <i>EIF3S8</i>   | NM_001037808 | NA         | NA       | royalblue | 0.16945 |
| <i>EIF4EBP1</i> | NM_004095    | rs4290385  | 3.28E-03 | royalblue | 0.37139 |
| <i>EIF5A</i>    | NM_001970    | rs724940   | 1.79E-02 | royalblue | 0.93764 |
| <i>ELK3</i>     | NM_005230    | rs720183   | 1.27E-03 | royalblue | 0.39498 |
| <i>EME1</i>     | NM_152463    | rs13033787 | 1.09E-02 | royalblue | 0.37839 |
| <i>EMID1</i>    | NM_133455    | rs2831062  | 2.05E-03 | royalblue | 0.95757 |
| <i>EMILIN2</i>  | NM_032048    | rs6793237  | 3.34E-03 | royalblue | 0.51449 |
| <i>ENOSF1</i>   | NM_017512    | rs12222447 | 3.62E-03 | royalblue | 0.65003 |
| <i>ENTPD6</i>   | NM_001247    | rs4820681  | 1.61E-03 | royalblue | 0.55749 |
| <i>EPHB2</i>    | NM_004442    | rs940009   | 1.18E-03 | royalblue | 0.74479 |
| <i>EPHB2</i>    | NM_017449    | rs940009   | 1.18E-03 | royalblue | 0.56398 |
| <i>ERGIC1</i>   | NM_001031711 | rs792965   | 3.98E-02 | royalblue | 0.42908 |
| <i>EXOSC4</i>   | NM_019037    | rs10499238 | 2.22E-02 | royalblue | 0.44153 |
| <i>EXOSC5</i>   | NM_020158    | rs11702684 | 1.83E-03 | royalblue | 0.36296 |
| <i>EXPH5</i>    | NM_015065    | rs8676     | 3.88E-03 | royalblue | 0.23540 |
| <i>EYA2</i>     | NM_005244    | rs6066149  | 2.75E-03 | royalblue | 0.43908 |
| <i>EYA2</i>     | NM_172112    | NA         | NA       | royalblue | 0.96809 |
| <i>F3</i>       | NM_001993    | rs10515226 | 1.80E-02 | royalblue | 0.65971 |
| <i>FAM107B</i>  | NM_031453    | rs7304054  | 2.77E-03 | royalblue | 0.80906 |
| <i>FAM20C</i>   | XM_928334    | NA         | NA       | royalblue | 0.47256 |
| <i>FAM35A</i>   | NM_019054    | rs277742   | 4.38E-03 | royalblue | 0.40020 |
| <i>FAM46A</i>   | NM_017633    | rs17083964 | 7.74E-03 | royalblue | 0.73688 |
| <i>FAM49A</i>   | NM_030797    | rs5992126  | 2.11E-03 | royalblue | 0.35074 |
| <i>FAM72A</i>   | NM_207418    | NA         | NA       | royalblue | 0.34026 |
| <i>FAM86A</i>   | NM_201400    | rs1479478  | 2.00E-03 | royalblue | 0.66757 |
| <i>FAM86A</i>   | NM_201598    | rs1479478  | 2.00E-03 | royalblue | 0.70161 |
| <i>FANCB</i>    | NM_001018113 | NA         | NA       | royalblue | 0.20711 |
| <i>FANCC</i>    | NM_000136    | rs12640523 | 3.49E-04 | royalblue | 0.17521 |
| <i>FANCD2</i>   | NM_001018115 | rs6432057  | 2.89E-03 | royalblue | 0.44682 |
| <i>FANCG</i>    | NM_004629    | rs136206   | 6.58E-03 | royalblue | 0.57531 |
| <i>FARP1</i>    | NM_005766    | rs1474620  | 1.64E-03 | royalblue | 0.61537 |
| <i>FARP1</i>    | NM_001001715 | rs16894821 | 7.60E-03 | royalblue | 0.42252 |
| <i>FARSLA</i>   | NM_004461    | NA         | NA       | royalblue | 0.53275 |
| <i>FBXL14</i>   | NM_152441    | rs2745580  | 1.20E-02 | royalblue | 0.31352 |
| <i>FCGRT</i>    | NM_004107    | rs8003961  | 1.82E-03 | royalblue | 0.68562 |
| <i>FCRLM1</i>   | NM_032738    | NA         | NA       | royalblue | 0.41053 |
| <i>FGF3</i>     | NM_005247    | rs9944985  | 2.33E-04 | royalblue | 0.61161 |
| <i>FHOD3</i>    | NM_025135    | rs2124748  | 3.20E-05 | royalblue | 0.90098 |
| <i>FKSG24</i>   | NM_032683    | NA         | NA       | royalblue | 0.47798 |
| <i>FLJ10081</i> | NM_017991    | NA         | NA       | royalblue | 0.70284 |
| <i>FLJ10490</i> | NM_018111    | NA         | NA       | royalblue | 0.10412 |

Supplementary Table 6

|                  |              |            |          |           |         |
|------------------|--------------|------------|----------|-----------|---------|
| <i>FLJ10661</i>  | NM_152563    | NA         | NA       | royalblue | 0.58931 |
| <i>FLJ11171</i>  | NM_018348    | NA         | NA       | royalblue | 0.64057 |
| <i>FLJ14466</i>  | NM_032790    | NA         | NA       | royalblue | 0.29776 |
| <i>FLJ20035</i>  | NM_017631    | NA         | NA       | royalblue | 0.40561 |
| <i>FLJ20160</i>  | NM_017694    | NA         | NA       | royalblue | 0.68006 |
| <i>FLJ20516</i>  | NM_017858    | NA         | NA       | royalblue | 0.46543 |
| <i>FLJ22184</i>  | XM_940456    | NA         | NA       | royalblue | 0.61379 |
| <i>FLJ22349</i>  | NM_024821    | NA         | NA       | royalblue | 0.19031 |
| <i>FLJ25084</i>  | NM_152792    | NA         | NA       | royalblue | 0.46456 |
| <i>FLJ32745</i>  | NM_144978    | NA         | NA       | royalblue | 0.66529 |
| <i>FLJ36748</i>  | NM_152406    | NA         | NA       | royalblue | 0.50674 |
| <i>FLJ43806</i>  | NM_201628    | NA         | NA       | royalblue | 0.45152 |
| <i>FLJ90013</i>  | NM_153365    | NA         | NA       | royalblue | 0.63161 |
| <i>FLRT1</i>     | NM_013280    | rs7825567  | 6.08E-04 | royalblue | 0.83426 |
| <i>FNDC5</i>     | NM_153756    | rs4799438  | 1.08E-02 | royalblue | 0.74313 |
| <i>FRMD5</i>     | NM_001031729 | NA         | NA       | royalblue | 0.62316 |
| <i>FSD1</i>      | NM_024333    | rs16989445 | 8.12E-04 | royalblue | 0.36995 |
| <i>FSD1</i>      | NM_024333    | rs16989445 | 8.12E-04 | royalblue | 0.34494 |
| <i>FSD1</i>      | NM_024333    | rs16989445 | 8.12E-04 | royalblue | 0.33894 |
| <i>FUT8</i>      | NM_178154    | rs5918959  | 5.22E-08 | royalblue | 0.48493 |
| <i>FZD8</i>      | NM_031866    | rs1077644  | 1.27E-03 | royalblue | 0.65846 |
| <i>G1P3</i>      | NM_002038    | rs11049169 | 1.86E-02 | royalblue | 0.74183 |
| <i>G6PD</i>      | NM_000402    | NA         | NA       | royalblue | 0.87997 |
| <i>GABARAPL1</i> | NM_031412    | rs2759630  | 4.12E-03 | royalblue | 0.59716 |
| <i>GABRA5</i>    | NM_000810    | rs1910962  | 3.46E-03 | royalblue | 0.69589 |
| <i>GALE</i>      | NM_000403    | rs12475813 | 1.12E-02 | royalblue | 0.39505 |
| <i>GALE</i>      | NM_000403    | rs12475813 | 1.12E-02 | royalblue | 0.04832 |
| <i>GALNT10</i>   | NM_198321    | rs10011174 | 3.13E-03 | royalblue | 0.69847 |
| <i>GALNTL4</i>   | NM_198516    | rs7931254  | 1.71E-03 | royalblue | 0.34690 |
| <i>GAS1</i>      | NM_002048    | rs7778127  | 2.63E-02 | royalblue | 0.21932 |
| <i>GAS7</i>      | NM_201432    | rs3786095  | 1.84E-04 | royalblue | 0.24626 |
| <i>GBP5</i>      | NM_052942    | rs7747355  | 2.33E-02 | royalblue | 0.31918 |
| <i>GBX2</i>      | NM_001485    | rs1327896  | 2.30E-01 | royalblue | 0.29431 |
| <i>GDF10</i>     | NM_004962    | rs8006920  | 1.24E-02 | royalblue | 0.57102 |
| <i>GDPD2</i>     | NM_017711    | NA         | NA       | royalblue | 0.90027 |
| <i>GFAP</i>      | NM_002055    | rs1325545  | 4.05E-03 | royalblue | 0.94947 |
| <i>GFRA2</i>     | NM_001495    | rs7318731  | 1.46E-03 | royalblue | 0.90129 |
| <i>GIYD1</i>     | NM_001014999 | NA         | NA       | royalblue | 0.40634 |
| <i>GIYD1</i>     | NM_001014999 | NA         | NA       | royalblue | 0.44747 |
| <i>GLDC</i>      | NM_000170    | rs4813802  | 1.63E-04 | royalblue | 0.86798 |
| <i>GLDN</i>      | NM_181789    | rs10484961 | 2.42E-03 | royalblue | 0.42200 |
| <i>GLUL</i>      | NM_001033044 | rs767002   | 7.90E-02 | royalblue | 0.55134 |
| <i>GMPPA</i>     | NM_013335    | rs13026308 | 8.26E-02 | royalblue | 0.65408 |
| <i>GMPPA</i>     | NM_205847    | rs13026308 | 8.26E-02 | royalblue | 0.38746 |
| <i>GMPPB</i>     | NM_021971    | rs9296619  | 1.78E-02 | royalblue | 0.76598 |
| <i>GNA14</i>     | NM_004297    | rs7171517  | 2.38E-03 | royalblue | 0.80152 |
| <i>GPATCH4</i>   | NM_182679    | rs4352688  | 1.24E-01 | royalblue | 0.56080 |
| <i>GPC2</i>      | NM_152742    | rs17782474 | 2.82E-02 | royalblue | 0.37542 |
| <i>GPI</i>       | NM_000175    | rs9369119  | 6.13E-04 | royalblue | 0.79481 |

Supplementary Table 6

|                    |              |            |          |           |         |        |
|--------------------|--------------|------------|----------|-----------|---------|--------|
| <i>GPR109B</i>     | NM_006018    | rs10066937 | 6.89E-02 | royalblue | 0.10416 |        |
| <i>GPR154</i>      | NM_207172    | NA         | NA       | royalblue | 0.56863 |        |
| <i>GPR176</i>      | NM_007223    | rs7081464  | 1.72E-03 | royalblue | 0.63868 |        |
| <i>GPR177</i>      | NM_001002292 | NA         | NA       | royalblue | 0.41679 |        |
| <i>GPR177</i>      | NM_001002292 | NA         | NA       | royalblue | 0.79942 |        |
| <i>GPR177</i>      | NM_024911    | NA         | NA       | royalblue | 0.96303 |        |
| <i>GPR30</i>       | NM_001031682 | NA         | NA       | royalblue | 0.76442 |        |
| <i>GPR30</i>       | NM_001039966 | NA         | NA       | royalblue | 0.67237 |        |
| <i>GPR30</i>       | NM_001505    | NA         | NA       | royalblue | 0.21640 |        |
| <i>GPR37</i>       | NM_005302    | rs11785137 | 6.57E-02 | royalblue | 0.91562 |        |
| <i>GPX3</i>        | NM_002084    | rs496220   | 6.69E-02 | royalblue | 0.92931 |        |
| <i>GRAMD1C</i>     | NM_017577    | rs8453     | 4.20E-03 | royalblue | 0.21345 |        |
| <i>GRHL3</i>       | NM_021180    | rs12523750 | 1.53E-02 | royalblue | 0.35947 |        |
| <i>GRHL3</i>       | NM_021180    | rs12523750 | 1.53E-02 | royalblue | 0.32887 |        |
| <i>GRHL3</i>       | NM_198173    | rs12523750 | 1.53E-02 | royalblue | 0.13864 |        |
| <i>GRK4</i>        | NM_001004057 | rs8078781  | 1.59E-04 | royalblue | 0.46599 |        |
| <i>GRM8</i>        | NM_000845    | rs9401829  | 9.28E-04 | royalblue | 0.46391 | autism |
| <i>GSTO1</i>       | NM_004832    | rs7792872  | 8.49E-03 | royalblue | 0.89670 |        |
| <i>GSTT2</i>       | NM_000854    | NA         | NA       | royalblue | 0.21021 |        |
| <i>GUCY1A2</i>     | NM_000855    | rs2079135  | 1.00E-04 | royalblue | 0.72482 |        |
| <i>GUCY1B3</i>     | NM_000857    | rs451851   | 1.16E-02 | royalblue | 0.43213 |        |
| <i>GYG2</i>        | NM_003918    | NA         | NA       | royalblue | 0.41291 |        |
| <i>GYS1</i>        | NM_002103    | rs12454023 | 7.90E-04 | royalblue | 0.19531 |        |
| <i>H3F3B</i>       | NM_005324    | rs17148885 | 3.61E-02 | royalblue | 0.92344 |        |
| <i>HCP1</i>        | NM_080669    | NA         | NA       | royalblue | 0.45434 |        |
| <i>HERC1</i>       | NM_003922    | rs17828306 | 1.22E-03 | royalblue | 0.42023 |        |
| <i>HIF1A</i>       | NM_181054    | rs198432   | 7.23E-03 | royalblue | 0.24622 |        |
| <i>HIST1H3C</i>    | NM_003531    | rs7721783  | 9.63E-03 | royalblue | 0.27056 |        |
| <i>HIST3H2A</i>    | NM_033445    | rs6758183  | 1.44E-01 | royalblue | 0.31655 |        |
| <i>HK1</i>         | NM_000188    | rs13416248 | 8.59E-03 | royalblue | 0.22955 |        |
| <i>HKDC1</i>       | NM_025130    | rs4737995  | 1.48E-03 | royalblue | 0.31894 |        |
| <i>HMBS</i>        | NM_000190    | rs7441935  | 5.88E-02 | royalblue | 0.85446 |        |
| <i>HMBS</i>        | NM_001024382 | rs7441935  | 5.88E-02 | royalblue | 0.79773 |        |
| <i>HNT</i>         | NM_016522    | NA         | NA       | royalblue | 0.69354 |        |
| <i>HOM-TES-103</i> | NM_080731    | NA         | NA       | royalblue | 0.38753 |        |
| <i>HPCA</i>        | NM_002143    | rs219208   | 1.12E-02 | royalblue | 0.23765 |        |
| <i>HRASLS3</i>     | NM_007069    | NA         | NA       | royalblue | 0.78014 |        |
| <i>HSD11B1</i>     | NM_181755    | rs10804160 | 6.04E-03 | royalblue | 0.75367 | autism |
| <i>HSD11B1</i>     | NM_181755    | rs10804160 | 6.04E-03 | royalblue | 0.62903 |        |
| <i>HSPC159</i>     | NM_014181    | rs7788331  | 1.15E-02 | royalblue | 0.15464 |        |
| <i>HTATIP</i>      | NM_182709    | NA         | NA       | royalblue | 0.38573 |        |
| <i>HTATIP2</i>     | NM_006410    | rs4982360  | 8.06E-04 | royalblue | 0.58374 |        |
| <i>ICAM3</i>       | NM_002162    | rs17808345 | 4.98E-02 | royalblue | 0.88493 |        |
| <i>ID3</i>         | NM_002167    | rs2828169  | 1.35E-03 | royalblue | 0.78022 |        |
| <i>IDS</i>         | NM_000202    | NA         | NA       | royalblue | 0.86456 |        |
| <i>IFI27</i>       | NM_005532    | rs13154274 | 1.86E-02 | royalblue | 0.31252 |        |
| <i>IFI6</i>        | NM_022872    | rs11049169 | 1.86E-02 | royalblue | 0.82612 |        |
| <i>IGSF4</i>       | NM_014333    | NA         | NA       | royalblue | 0.87140 |        |
| <i>IL17RD</i>      | NM_001080973 | NA         | NA       | royalblue | 0.60936 |        |

Supplementary Table 6

|                  |              |            |          |           |         |        |
|------------------|--------------|------------|----------|-----------|---------|--------|
| <i>IL18BP</i>    | NM_173042    | rs1967880  | 2.43E-02 | royalblue | 0.17923 |        |
| <i>IL1F7</i>     | NM_014439    | rs7798992  | 2.80E-02 | royalblue | 0.43325 |        |
| <i>IL7R</i>      | NM_002185    | rs8078319  | 1.68E-02 | royalblue | 0.17424 |        |
| <i>IMP4</i>      | NM_033416    | rs12776148 | 2.13E-02 | royalblue | 0.76808 |        |
| <i>INHBB</i>     | NM_002193    | rs10092747 | 7.74E-03 | royalblue | 0.91219 |        |
| <i>INSM1</i>     | NM_002196    | rs11624594 | 8.09E-04 | royalblue | 0.75222 |        |
| <i>ITGB3BP</i>   | NM_014288    | rs2877427  | 2.21E-03 | royalblue | 0.31853 |        |
| <i>ITGB4</i>     | NM_001005731 | rs1351419  | 4.06E-04 | royalblue | 0.61491 |        |
| <i>ITPA</i>      | NM_033453    | rs334763   | 8.24E-03 | royalblue | 0.64363 |        |
| <i>JAG2</i>      | NM_002226    | rs13124966 | 8.13E-03 | royalblue | 0.44063 |        |
| <i>JMJD1C</i>    | NM_004241    | rs17767008 | 2.02E-03 | royalblue | 0.42577 | autism |
| <i>JMJD1C</i>    | NM_032776    | rs17767008 | 2.02E-03 | royalblue | 0.39495 |        |
| <i>K6HF</i>      | NM_004693    | NA         | NA       | royalblue | 0.24352 |        |
| <i>KAL1</i>      | NM_000216    | NA         | NA       | royalblue | 0.93192 |        |
| <i>KCND3</i>     | NM_004980    | rs475620   | 2.34E-03 | royalblue | 0.29489 |        |
| <i>KCNIP1</i>    | NM_014592    | rs7591026  | 6.64E-03 | royalblue | 0.95983 |        |
| <i>KCNIP4</i>    | NM_001035004 | rs579096   | 1.65E-04 | royalblue | 0.76652 |        |
| <i>KCNIP4</i>    | NM_147182    | rs579096   | 1.65E-04 | royalblue | 0.37469 |        |
| <i>KCNK10</i>    | NM_021161    | rs645063   | 4.75E-03 | royalblue | 0.88373 |        |
| <i>KCNK10</i>    | NM_021161    | rs645063   | 4.75E-03 | royalblue | 0.28886 |        |
| <i>KCNK2</i>     | NM_001017425 | rs17274552 | 1.30E-02 | royalblue | 0.94965 |        |
| <i>KCNN3</i>     | NM_170782    | rs1385253  | 2.14E-03 | royalblue | 0.71632 |        |
| <i>KCTD17</i>    | NM_024681    | rs2942382  | 3.35E-03 | royalblue | 0.16378 |        |
| <i>KDELC1</i>    | NM_024089    | rs10778237 | 1.41E-03 | royalblue | 0.44184 |        |
| <i>KDELR3</i>    | NM_006855    | rs9306949  | 1.63E-03 | royalblue | 0.53425 |        |
| <i>KDELR3</i>    | NM_016657    | rs9306949  | 1.63E-03 | royalblue | 0.87784 |        |
| <i>KDELR3</i>    | NM_016657    | rs9306949  | 1.63E-03 | royalblue | 0.15772 |        |
| <i>KIAA0241</i>  | NM_015060    | NA         | NA       | royalblue | 0.31759 |        |
| <i>KIAA0274</i>  | NM_014845    | NA         | NA       | royalblue | 0.56295 |        |
| <i>KIAA0513</i>  | NM_014732    | rs1452243  | 2.22E-02 | royalblue | 0.52011 |        |
| <i>KIAA1199</i>  | NM_018689    | rs7071575  | 2.75E-04 | royalblue | 0.43871 |        |
| <i>KIAA1217</i>  | NM_019590    | rs2975186  | 1.78E-03 | royalblue | 0.31133 |        |
| <i>KIAA1324</i>  | NM_020775    | rs944178   | 2.04E-03 | royalblue | 0.13899 |        |
| <i>KIAA1344</i>  | NM_020784    | NA         | NA       | royalblue | 0.65120 |        |
| <i>KIAA1434</i>  | NM_019593    | NA         | NA       | royalblue | 0.29222 |        |
| <i>KIAA1600</i>  | NM_020940    | NA         | NA       | royalblue | 0.59194 |        |
| <i>KIAA1754L</i> | NM_001008949 | NA         | NA       | royalblue | 0.57887 |        |
| <i>KIAA1944</i>  | NM_133448    | NA         | NA       | royalblue | 0.19035 |        |
| <i>KIAA1958</i>  | NM_133465    | rs959619   | 1.78E-03 | royalblue | 0.50114 |        |
| <i>KIAA2026</i>  | NM_001017969 | rs13257249 | 3.89E-03 | royalblue | 0.60004 |        |
| <i>KIF17</i>     | NM_020816    | rs510395   | 1.06E-02 | royalblue | 0.60382 |        |
| <i>KITLG</i>     | NM_000899    | rs9300794  | 6.56E-03 | royalblue | 0.34579 |        |
| <i>KLF9</i>      | NM_001206    | rs17780422 | 1.28E-03 | royalblue | 0.91456 |        |
| <i>KLHDC4</i>    | NM_017566    | rs4073109  | 2.66E-03 | royalblue | 0.56005 |        |
| <i>KLHL4</i>     | NM_019117    | NA         | NA       | royalblue | 0.41688 |        |
| <i>KSP37</i>     | NM_031950    | NA         | NA       | royalblue | 0.97076 |        |
| <i>LAMA2</i>     | NM_000426    | rs3807120  | 5.20E-04 | royalblue | 0.60344 |        |
| <i>LAMA4</i>     | NM_002290    | rs10817103 | 6.23E-03 | royalblue | 0.62372 |        |
| <i>LAMB1</i>     | NM_002291    | rs6943225  | 8.55E-03 | royalblue | 0.15687 | autism |

Supplementary Table 6

|                  |              |            |          |           |         |        |
|------------------|--------------|------------|----------|-----------|---------|--------|
| <i>LASS4</i>     | NM_024552    | rs962731   | 6.93E-04 | royalblue | 0.29596 |        |
| <i>LDB2</i>      | NM_001290    | rs10508507 | 1.28E-03 | royalblue | 0.71305 |        |
| <i>LFNG</i>      | NM_001040168 | rs9663489  | 1.39E-02 | royalblue | 0.52882 |        |
| <i>LFNG</i>      | NM_002304    | rs9663489  | 1.39E-02 | royalblue | 0.83186 |        |
| <i>LIME1</i>     | NM_017806    | rs17828306 | 1.22E-03 | royalblue | 0.16590 |        |
| <i>LOC124512</i> | XM_940962    | NA         | NA       | royalblue | 0.62658 |        |
| <i>LOC138046</i> | NM_173848    | NA         | NA       | royalblue | 0.85339 |        |
| <i>LOC143543</i> | NR_002197    | NA         | NA       | royalblue | 0.14175 |        |
| <i>LOC150223</i> | NM_001017964 | NA         | NA       | royalblue | 0.40521 |        |
| <i>LOC158160</i> | NM_001031744 | NA         | NA       | royalblue | 0.67974 |        |
| <i>LOC158160</i> | NM_182829    | NA         | NA       | royalblue | 0.75054 |        |
| <i>LOC283377</i> | NM_207344    | NA         | NA       | royalblue | 0.71877 |        |
| <i>LOC283755</i> | NM_001024682 | NA         | NA       | royalblue | 0.43138 |        |
| <i>LOC283871</i> | NM_001042371 | NA         | NA       | royalblue | 0.32625 |        |
| <i>LOC284434</i> | NM_001007525 | NA         | NA       | royalblue | 0.88700 |        |
| <i>LOC349136</i> | NM_198285    | NA         | NA       | royalblue | 0.83635 |        |
| <i>LOC401152</i> | NM_001001701 | NA         | NA       | royalblue | 0.57259 |        |
| <i>LOC497190</i> | NM_001011880 | NA         | NA       | royalblue | 0.80311 |        |
| <i>LOC51334</i>  | NM_016644    | NA         | NA       | royalblue | 0.81570 |        |
| <i>LOC650000</i> | XM_942166    | NA         | NA       | royalblue | 0.26555 |        |
| <i>LOC92196</i>  | NM_001017920 | NA         | NA       | royalblue | 0.52754 |        |
| <i>LOX</i>       | NM_002317    | rs2715954  | 2.53E-02 | royalblue | 0.83505 |        |
| <i>LRFN5</i>     | NM_152447    | rs7955255  | 1.45E-03 | royalblue | 0.28214 | autism |
| <i>LRRC4C</i>    | NM_020929    | rs3783167  | 2.13E-04 | royalblue | 0.41310 |        |
| <i>LRRTM4</i>    | NM_024993    | rs17100458 | 1.90E-03 | royalblue | 0.60477 |        |
| <i>LSS</i>       | NM_001001438 | rs2839159  | 6.83E-04 | royalblue | 0.16660 |        |
| <i>LTB4DH</i>    | NM_012212    | NA         | NA       | royalblue | 0.70171 |        |
| <i>LTBP3</i>     | NM_021070    | rs11735072 | 2.52E-02 | royalblue | 0.89999 |        |
| <i>LY96</i>      | NM_015364    | rs2134837  | 8.66E-04 | royalblue | 0.72435 |        |
| <i>LYPD1</i>     | NM_144586    | rs6596148  | 2.00E-02 | royalblue | 0.41829 |        |
| <i>M-RIP</i>     | NM_201274    | NA         | NA       | royalblue | 0.61448 |        |
| <i>MAFB</i>      | NM_005461    | rs17456364 | 9.15E-03 | royalblue | 0.92763 |        |
| <i>MAGI1</i>     | NM_004742    | rs11131036 | 7.78E-04 | royalblue | 0.32765 |        |
| <i>MAGI3</i>     | NM_020965    | NA         | NA       | royalblue | 0.53597 |        |
| <i>MAMDC2</i>    | NM_153267    | rs7173049  | 7.74E-04 | royalblue | 0.92846 |        |
| <i>MAP3K14</i>   | NM_003954    | rs9369223  | 5.00E-03 | royalblue | 0.78817 |        |
| <i>MAP4K2</i>    | NM_004579    | rs17180532 | 3.75E-02 | royalblue | 0.79499 |        |
| <i>MAP7</i>      | NM_003980    | rs10496744 | 3.40E-03 | royalblue | 0.39092 |        |
| <i>MAPT</i>      | NM_016834    | rs10742587 | 2.09E-03 | royalblue | 0.54169 |        |
| <i>MASS1</i>     | NM_032119    | rs490812   | 1.44E-05 | royalblue | 0.36945 |        |
| <i>MATR3</i>     | NM_199189    | rs4825011  | 2.48E-02 | royalblue | 0.55868 |        |
| <i>MBNL2</i>     | NM_207304    | rs17685664 | 5.46E-04 | royalblue | 0.42968 |        |
| <i>MBOAT2</i>    | NM_138799    | rs11715608 | 8.31E-04 | royalblue | 0.51771 |        |
| <i>MC5R</i>      | NM_005913    | rs2114199  | 3.17E-03 | royalblue | 0.47872 |        |
| <i>MDGA1</i>     | NM_153487    | rs16994165 | 1.04E-03 | royalblue | 0.61957 |        |
| <i>ME3</i>       | NM_006680    | rs1529952  | 2.79E-04 | royalblue | 0.42604 |        |
| <i>MEGF10</i>    | NM_032446    | rs17165035 | 3.03E-03 | royalblue | 0.81471 |        |
| <i>METRN</i>     | NM_024042    | rs12222447 | 3.62E-03 | royalblue | 0.79524 |        |
| <i>MGC15416</i>  | NM_138418    | NA         | NA       | royalblue | 0.42310 |        |

Supplementary Table 6

|                 |              |            |          |           |         |
|-----------------|--------------|------------|----------|-----------|---------|
| <i>MGC26856</i> | NM_152779    | NA         | NA       | royalblue | 0.48114 |
| <i>MGC3101</i>  | NM_024043    | rs2142195  | 2.46E-02 | royalblue | 0.87803 |
| <i>MGC34761</i> | NM_173619    | NA         | NA       | royalblue | 0.48029 |
| <i>MGC5242</i>  | NM_024033    | NA         | NA       | royalblue | 0.55366 |
| <i>MGC61571</i> | NM_182523    | NA         | NA       | royalblue | 0.32343 |
| <i>MGC70863</i> | NM_203302    | NA         | NA       | royalblue | 0.51703 |
| <i>MGEA5</i>    | NM_012215    | rs11164767 | 6.55E-04 | royalblue | 0.82541 |
| <i>MICB</i>     | NM_005931    | rs1279007  | 1.57E-02 | royalblue | 0.10283 |
| <i>mimitin</i>  | NM_174889    | NA         | NA       | royalblue | 0.39432 |
| <i>MKKS</i>     | NM_170784    | rs280502   | 3.39E-02 | royalblue | 0.23307 |
| <i>MLL3</i>     | NM_170606    | rs11687663 | 3.96E-04 | royalblue | 0.51251 |
| <i>MLLT1</i>    | NM_005934    | rs749005   | 4.38E-03 | royalblue | 0.55018 |
| <i>MMP16</i>    | NM_022564    | NA         | NA       | royalblue | 0.25584 |
| <i>MMRN1</i>    | NM_007351    | rs7068816  | 1.11E-02 | royalblue | 0.87610 |
| <i>MN1</i>      | NM_002430    | rs9512503  | 1.41E-03 | royalblue | 0.54851 |
| <i>MND1</i>     | NM_032117    | rs1881690  | 7.96E-04 | royalblue | 0.58302 |
| <i>MOBK12B</i>  | NM_024761    | rs1555453  | 3.00E-03 | royalblue | 0.90020 |
| <i>MPP4</i>     | NM_033066    | rs7519922  | 1.01E-01 | royalblue | 0.97093 |
| <i>MPP6</i>     | NM_016447    | rs1910962  | 3.46E-03 | royalblue | 0.62128 |
| <i>MPPED2</i>   | NM_001584    | rs4422383  | 2.46E-03 | royalblue | 0.72691 |
| <i>MRE11A</i>   | NM_005590    | rs11107798 | 3.57E-02 | royalblue | 0.20992 |
| <i>MRFAP1L1</i> | NM_152301    | NA         | NA       | royalblue | 0.72111 |
| <i>MRPL19</i>   | NM_014763    | rs2013022  | 3.24E-02 | royalblue | 0.32319 |
| <i>MRPL24</i>   | NM_024540    | rs799761   | 1.58E-02 | royalblue | 0.63786 |
| <i>MRPL35</i>   | NM_145644    | rs10735255 | 1.01E-02 | royalblue | 0.79672 |
| <i>MRPS18A</i>  | NM_018135    | rs1175222  | 9.94E-03 | royalblue | 0.56928 |
| <i>MRPS34</i>   | NM_023936    | rs1124200  | 4.46E-03 | royalblue | 0.47859 |
| <i>MRRF</i>     | NM_138777    | rs1011151  | 1.48E-03 | royalblue | 0.65995 |
| <i>MT1F</i>     | NM_005949    | rs373532   | 3.49E-02 | royalblue | 0.58412 |
| <i>MT1H</i>     | NM_005951    | rs1900418  | 3.10E-02 | royalblue | 0.12596 |
| <i>MTFR1</i>    | NM_014637    | rs4856953  | 1.02E-02 | royalblue | 0.33024 |
| <i>MTG1</i>     | NM_138384    | rs1467334  | 2.58E-02 | royalblue | 0.66056 |
| <i>MTMR2</i>    | NM_201281    | rs6834248  | 4.90E-03 | royalblue | 0.59506 |
| <i>MTSS1</i>    | NM_014751    | rs314946   | 7.77E-05 | royalblue | 0.83108 |
| <i>MTTP</i>     | NM_000253    | rs4727484  | 9.33E-03 | royalblue | 0.50030 |
| <i>MVK</i>      | NM_000431    | rs1036214  | 1.01E-02 | royalblue | 0.73232 |
| <i>MYBPHL</i>   | NM_001010985 | rs7654972  | 1.09E-02 | royalblue | 0.80025 |
| <i>MYCBP</i>    | NM_012333    | rs2317512  | 4.22E-02 | royalblue | 0.61399 |
| <i>MYLIP</i>    | NM_013262    | rs10803414 | 1.93E-03 | royalblue | 0.42818 |
| <i>MYLK</i>     | NM_005965    | NA         | NA       | royalblue | 0.50983 |
| <i>MYO5C</i>    | NM_018728    | rs2282751  | 9.49E-04 | royalblue | 0.62655 |
| <i>MYOHD1</i>   | NM_001033580 | NA         | NA       | royalblue | 0.52771 |
| <i>MYT1</i>     | NM_004535    | rs3755827  | 7.47E-04 | royalblue | 0.97880 |
| <i>NANOS1</i>   | NM_199461    | rs10787899 | 4.68E-02 | royalblue | 0.46305 |
| <i>NCAM1</i>    | NM_001076682 | rs4839202  | 7.48E-04 | royalblue | 0.28550 |
| <i>NCAM1</i>    | NM_181351    | rs4839202  | 7.48E-04 | royalblue | 0.63430 |
| <i>NCAM2</i>    | NM_004540    | rs12582514 | 2.64E-04 | royalblue | 0.55480 |
| <i>NCOA7</i>    | NM_181782    | rs10818964 | 7.06E-03 | royalblue | 0.59482 |
| <i>NEDD4L</i>   | NM_015277    | rs12606138 | 6.48E-04 | royalblue | 0.84439 |



Supplementary Table 6

|                 |              |            |          |           |         |        |
|-----------------|--------------|------------|----------|-----------|---------|--------|
| <i>NEXN</i>     | NM_144573    | rs4708333  | 8.30E-04 | royalblue | 0.61750 |        |
| <i>NF2</i>      | NM_181828    | rs2831462  | 8.61E-05 | royalblue | 0.39105 |        |
| <i>NF2</i>      | NM_181831    | rs2831462  | 8.61E-05 | royalblue | 0.38071 |        |
| <i>NFIA</i>     | NM_005595    | rs7078432  | 3.23E-03 | royalblue | 0.45607 |        |
| <i>NFIC</i>     | NM_005597    | rs16844401 | 2.61E-03 | royalblue | 0.19780 |        |
| <i>NFIL3</i>    | NM_005384    | rs883121   | 7.10E-03 | royalblue | 0.53365 |        |
| <i>NFKB2</i>    | NM_002502    | rs4338031  | 2.79E-02 | royalblue | 0.23255 |        |
| <i>NINJ1</i>    | NM_004148    | rs43059    | 3.36E-02 | royalblue | 0.47104 |        |
| <i>NME1</i>     | NM_198175    | rs11702684 | 1.83E-03 | royalblue | 0.60916 |        |
| <i>NME2</i>     | NM_001018138 | rs11702684 | 1.83E-03 | royalblue | 0.33499 |        |
| <i>NME4</i>     | NM_005009    | rs7749710  | 2.85E-02 | royalblue | 0.74389 |        |
| <i>NMNAT3</i>   | NM_178177    | rs12641953 | 4.40E-05 | royalblue | 0.64403 |        |
| <i>NNAT</i>     | NM_005386    | rs7988209  | 1.93E-02 | royalblue | 0.89942 |        |
| <i>NNAT</i>     | NM_005386    | rs7988209  | 1.93E-02 | royalblue | 0.94594 |        |
| <i>NP</i>       | NM_000270    | NA         | NA       | royalblue | 0.77939 |        |
| <i>NPAS2</i>    | NM_002518    | rs17611664 | 2.65E-03 | royalblue | 0.44314 | autism |
| <i>NPPA</i>     | NM_006172    | rs210920   | 1.57E-02 | royalblue | 0.50646 |        |
| <i>NQO1</i>     | NM_000903    | rs17425781 | 5.38E-03 | royalblue | 0.96466 |        |
| <i>NR2E1</i>    | NM_003269    | rs537111   | 5.40E-05 | royalblue | 0.48943 |        |
| <i>NRGN</i>     | NM_006176    | rs1011151  | 1.48E-03 | royalblue | 0.67603 |        |
| <i>NRN1</i>     | NM_016588    | rs10775385 | 4.14E-03 | royalblue | 0.56383 |        |
| <i>NTHL1</i>    | NM_002528    | rs2108636  | 3.73E-03 | royalblue | 0.39391 |        |
| <i>NTNG2</i>    | NM_032536    | rs1377296  | 8.24E-03 | royalblue | 0.43804 |        |
| <i>NUDT22</i>   | NM_032344    | rs1059440  | 3.07E-03 | royalblue | 0.64778 |        |
| <i>NUP155</i>   | NM_004298    | rs2843964  | 3.45E-03 | royalblue | 0.39475 |        |
| <i>NXN</i>      | NM_022463    | rs7937869  | 1.25E-03 | royalblue | 0.76642 |        |
| <i>NYD-SP18</i> | NM_032599    | NA         | NA       | royalblue | 0.30179 |        |
| <i>OACT2</i>    | XM_938724    | NA         | NA       | royalblue | 0.49147 |        |
| <i>OASL</i>     | NM_003733    | rs2064570  | 1.05E-02 | royalblue | 0.11806 |        |
| <i>OLFML3</i>   | NM_020190    | rs352074   | 2.39E-03 | royalblue | 0.92055 |        |
| <i>OLIG2</i>    | NM_005806    | rs1539849  | 2.47E-02 | royalblue | 0.81282 |        |
| <i>OPCML</i>    | NM_001012393 | rs9321351  | 8.08E-05 | royalblue | 0.30727 |        |
| <i>OPRS1</i>    | NM_147160    | NA         | NA       | royalblue | 0.51255 |        |
| <i>OTOF</i>     | NM_194248    | rs12031946 | 6.41E-04 | royalblue | 0.14000 |        |
| <i>OXCT2</i>    | NM_022120    | rs16869484 | 1.46E-02 | royalblue | 0.44959 |        |
| <i>P2RX5</i>    | NM_175081    | rs12455601 | 2.10E-02 | royalblue | 0.20512 |        |
| <i>P2RY13</i>   | NM_176894    | rs17204376 | 6.22E-02 | royalblue | 0.17482 |        |
| <i>PAICS</i>    | NM_006452    | rs10160419 | 1.18E-02 | royalblue | 0.65587 |        |
| <i>PALM</i>     | NM_002579    | rs12222447 | 3.62E-03 | royalblue | 0.53863 |        |
| <i>PAPLN</i>    | NM_173462    | rs6919752  | 2.19E-02 | royalblue | 0.66029 |        |
| <i>PAPSS2</i>   | NM_004670    | rs12704506 | 2.99E-02 | royalblue | 0.71273 |        |
| <i>PARVB</i>    | NM_013327    | rs1981008  | 4.49E-03 | royalblue | 0.31013 |        |
| <i>PBX1</i>     | NM_002585    | rs3736200  | 9.21E-03 | royalblue | 0.50516 |        |
| <i>PC-3</i>     | NM_001044264 | NA         | NA       | royalblue | 0.12494 |        |
| <i>PCDH17</i>   | NM_014459    | NA         | NA       | royalblue | 0.44513 |        |
| <i>PCDH9</i>    | NM_020403    | rs10492203 | 5.23E-04 | royalblue | 0.34035 | autism |
| <i>PCDHA2</i>   | NM_031495    | rs16910093 | 1.87E-02 | royalblue | 0.38611 |        |
| <i>PCDHB2</i>   | NM_018936    | rs11762357 | 1.14E-01 | royalblue | 0.91771 |        |
| <i>PCDHB4</i>   | NM_018938    | rs7722330  | 2.45E-01 | royalblue | 0.69190 |        |

Supplementary Table 6

|                 |              |            |          |           |         |        |
|-----------------|--------------|------------|----------|-----------|---------|--------|
| <i>PCDHB9</i>   | NM_019119    | rs11924964 | 1.62E-01 | royalblue | 0.36368 |        |
| <i>PCDHGC3</i>  | NM_002588    | rs1584783  | 5.70E-05 | royalblue | 0.13160 |        |
| <i>PCGF2</i>    | NM_007144    | rs1994582  | 8.85E-03 | royalblue | 0.91965 |        |
| <i>PCNA</i>     | NM_182649    | rs4765803  | 4.53E-04 | royalblue | 0.26867 |        |
| <i>PCSK1N</i>   | NM_013271    | NA         | NA       | royalblue | 0.93686 |        |
| <i>PCYT2</i>    | NM_002861    | rs1549118  | 2.16E-03 | royalblue | 0.50080 |        |
| <i>PDCD8</i>    | NM_004208    | NA         | NA       | royalblue | 0.78635 |        |
| <i>PDCD8</i>    | NM_004208    | NA         | NA       | royalblue | 0.37480 |        |
| <i>PDE8B</i>    | NM_001029851 | rs1176811  | 1.63E-03 | royalblue | 0.20888 |        |
| <i>PDGFD</i>    | NM_025208    | rs7543626  | 3.26E-04 | royalblue | 0.95325 |        |
| <i>PDGFD</i>    | NM_025208    | rs7543626  | 3.26E-04 | royalblue | 0.94471 |        |
| <i>PDGFRB</i>   | NM_002609    | rs6865659  | 3.97E-02 | royalblue | 0.76143 |        |
| <i>PDIA5</i>    | NM_006810    | rs2717233  | 1.79E-02 | royalblue | 0.96050 |        |
| <i>PDK3</i>     | NM_005391    | NA         | NA       | royalblue | 0.44936 |        |
| <i>PELI2</i>    | NM_021255    | rs159076   | 9.14E-04 | royalblue | 0.98418 |        |
| <i>PGBD5</i>    | NM_024554    | rs1715826  | 6.87E-02 | royalblue | 0.86597 |        |
| <i>PGM5</i>     | XM_936702    | NA         | NA       | royalblue | 0.34160 |        |
| <i>PHKA2</i>    | NM_000292    | NA         | NA       | royalblue | 0.66290 |        |
| <i>PIPOX</i>    | NM_016518    | rs1394764  | 3.89E-03 | royalblue | 0.40822 |        |
| <i>PKIB</i>     | NM_032471    | rs7973103  | 2.61E-03 | royalblue | 0.88122 |        |
| <i>PKM2</i>     | NM_002654    | rs12883168 | 5.01E-03 | royalblue | 0.35973 |        |
| <i>PLA2G12A</i> | NM_030821    | rs2158844  | 1.48E-03 | royalblue | 0.47095 |        |
| <i>PLA2G3</i>   | NM_015715    | rs12547428 | 6.04E-03 | royalblue | 0.83161 |        |
| <i>PLCB4</i>    | NM_000933    | rs7780856  | 9.27E-04 | royalblue | 0.33254 |        |
| <i>PLEKHA1</i>  | NM_001001974 | rs10934622 | 9.94E-05 | royalblue | 0.24507 |        |
| <i>PLEKHG4</i>  | NM_015432    | rs4883777  | 4.45E-02 | royalblue | 0.46538 |        |
| <i>PLTP</i>     | NM_006227    | rs1979470  | 1.64E-02 | royalblue | 0.92722 |        |
| <i>PLXNC1</i>   | NM_005761    | rs10991869 | 6.66E-03 | royalblue | 0.49323 |        |
| <i>PNCK</i>     | NM_198452    | NA         | NA       | royalblue | 0.45049 |        |
| <i>PNKP</i>     | NM_007254    | rs17745017 | 3.69E-02 | royalblue | 0.64858 |        |
| <i>PNOC</i>     | NM_006228    | rs2092018  | 2.59E-03 | royalblue | 0.94234 |        |
| <i>POLA2</i>    | NM_002689    | rs11923135 | 2.07E-02 | royalblue | 0.72620 |        |
| <i>POLE4</i>    | NM_019896    | rs2134837  | 8.66E-04 | royalblue | 0.73141 |        |
| <i>POLR2J</i>   | NM_006234    | rs17548007 | 3.13E-02 | royalblue | 0.33499 |        |
| <i>POLR3G</i>   | NM_006467    | rs11743030 | 4.05E-06 | royalblue | 0.19167 |        |
| <i>POLR3K</i>   | NM_016310    | rs11542478 | 1.10E-02 | royalblue | 0.49862 |        |
| <i>POU3F4</i>   | NM_000307    | NA         | NA       | royalblue | 0.36288 |        |
| <i>PPARGC1A</i> | NM_013261    | rs4346460  | 1.56E-03 | royalblue | 0.55649 |        |
| <i>PPGB</i>     | NM_000308    | NA         | NA       | royalblue | 0.65200 |        |
| <i>PPM1B</i>    | NM_001033556 | rs1984192  | 5.50E-04 | royalblue | 0.26349 |        |
| <i>PPM1G</i>    | NM_177983    | rs4923447  | 1.03E-02 | royalblue | 0.21624 |        |
| <i>PPY</i>      | NM_002722    | rs7292804  | 3.12E-02 | royalblue | 0.58718 |        |
| <i>PRDM16</i>   | NM_022114    | rs8078781  | 1.59E-04 | royalblue | 0.54541 |        |
| <i>PRIM1</i>    | NM_000946    | rs7174662  | 5.01E-04 | royalblue | 0.74663 |        |
| <i>PRIM2A</i>   | NM_000947    | NA         | NA       | royalblue | 0.30386 |        |
| <i>PRKCB1</i>   | NM_002738    | NA         | NA       | royalblue | 0.84335 | autism |
| <i>PRKCB1</i>   | NM_212535    | NA         | NA       | royalblue | 0.38975 |        |
| <i>PRKCB1</i>   | NM_212535    | NA         | NA       | royalblue | 0.57941 |        |
| <i>PRKCQ</i>    | NM_006257    | rs4813802  | 1.63E-04 | royalblue | 0.51633 |        |

Supplementary Table 6

|                |              |            |          |           |         |        |
|----------------|--------------|------------|----------|-----------|---------|--------|
| <i>PRKX</i>    | NM_005044    | NA         | NA       | royalblue | 0.56530 |        |
| <i>PRPS2</i>   | NM_002765    | NA         | NA       | royalblue | 0.62776 |        |
| <i>PRRX1</i>   | NM_006902    | rs4131005  | 1.86E-03 | royalblue | 0.41739 |        |
| <i>PSD3</i>    | NM_206909    | rs2717756  | 3.20E-04 | royalblue | 0.41028 |        |
| <i>PSMC3IP</i> | NM_016556    | rs4290385  | 3.28E-03 | royalblue | 0.41667 |        |
| <i>PTGS1</i>   | NM_080591    | rs11785137 | 6.57E-02 | royalblue | 0.70313 |        |
| <i>PTK2B</i>   | NM_173176    | rs967144   | 1.52E-03 | royalblue | 0.37498 |        |
| <i>PTPRK</i>   | NM_002844    | rs9827714  | 2.48E-04 | royalblue | 0.62817 |        |
| <i>PTPRO</i>   | NM_030671    | rs4416821  | 2.73E-03 | royalblue | 0.88774 |        |
| <i>PTPRT</i>   | NM_007050    | rs3783167  | 2.13E-04 | royalblue | 0.67231 |        |
| <i>PXN</i>     | NM_002859    | rs1688615  | 1.33E-03 | royalblue | 0.23889 |        |
| <i>PYGB</i>    | NM_002862    | rs12893752 | 8.55E-03 | royalblue | 0.43978 |        |
| <i>PYGL</i>    | NM_002863    | rs913465   | 3.20E-03 | royalblue | 0.19669 |        |
| <i>QPCTL</i>   | NM_017659    | rs3914729  | 1.70E-03 | royalblue | 0.80748 |        |
| <i>RAB32</i>   | NM_006834    | rs2673862  | 2.98E-02 | royalblue | 0.53385 |        |
| <i>RAD51L3</i> | NM_002878    | rs4422383  | 2.46E-03 | royalblue | 0.25969 |        |
| <i>RAD51L3</i> | NM_002878    | rs4422383  | 2.46E-03 | royalblue | 0.50378 |        |
| <i>RAD54B</i>  | NM_012415    | rs11626041 | 5.00E-03 | royalblue | 0.63254 |        |
| <i>RANBP1</i>  | NM_002882    | rs2717756  | 3.20E-04 | royalblue | 0.46191 |        |
| <i>RANGAP1</i> | NM_002883    | rs704787   | 1.07E-02 | royalblue | 0.90291 |        |
| <i>RARRES3</i> | NM_004585    | rs10274542 | 2.63E-02 | royalblue | 0.96740 |        |
| <i>RASA3</i>   | NM_007368    | rs9855853  | 7.41E-04 | royalblue | 0.64338 |        |
| <i>RASAL2</i>  | NM_004841    | rs3116565  | 7.72E-02 | royalblue | 0.33363 |        |
| <i>RASD1</i>   | NM_016084    | rs12408879 | 1.49E-02 | royalblue | 0.97743 |        |
| <i>RASGRF2</i> | NM_006909    | rs12574041 | 4.77E-04 | royalblue | 0.76943 |        |
| <i>RASGRP3</i> | NM_170672    | rs10941060 | 6.61E-03 | royalblue | 0.42296 |        |
| <i>RASL11B</i> | NM_023940    | rs6838718  | 5.14E-03 | royalblue | 0.60806 |        |
| <i>RBM33</i>   | NM_001008408 | NA         | NA       | royalblue | 0.61194 |        |
| <i>RBMS2</i>   | NM_002898    | rs1461796  | 1.11E-03 | royalblue | 0.56783 |        |
| <i>RBP1</i>    | NM_002899    | rs9698057  | 6.58E-03 | royalblue | 0.84744 |        |
| <i>RCBTB2</i>  | NM_001268    | rs12902281 | 1.29E-02 | royalblue | 0.81455 |        |
| <i>RCOR2</i>   | NM_173587    | rs4253945  | 4.53E-02 | royalblue | 0.54539 |        |
| <i>RDBP</i>    | NM_002904    | rs631108   | 2.14E-03 | royalblue | 0.57851 |        |
| <i>RDH5</i>    | NM_002905    | rs17117895 | 8.40E-04 | royalblue | 0.79465 |        |
| <i>RECQL</i>   | NM_002907    | rs12582514 | 2.64E-04 | royalblue | 0.34324 |        |
| <i>REEP4</i>   | NM_025232    | rs10022239 | 5.45E-03 | royalblue | 0.43565 |        |
| <i>RERE</i>    | NM_012102    | rs10758979 | 3.28E-03 | royalblue | 0.36297 |        |
| <i>RERE</i>    | NM_012102    | rs10758979 | 3.28E-03 | royalblue | 0.40661 |        |
| <i>RFC2</i>    | NM_181471    | rs11626364 | 1.12E-02 | royalblue | 0.61809 |        |
| <i>RGS12</i>   | NM_002926    | rs9854706  | 2.71E-03 | royalblue | 0.79442 |        |
| <i>RGS19</i>   | NM_005873    | rs11668315 | 1.08E-02 | royalblue | 0.82343 |        |
| <i>RHBDL1</i>  | NM_003961    | rs2606246  | 9.69E-03 | royalblue | 0.58708 |        |
| <i>RIC3</i>    | NM_024557    | rs6638761  | 3.62E-03 | royalblue | 0.62611 |        |
| <i>RIMS3</i>   | NM_014747    | rs887496   | 1.09E-02 | royalblue | 0.92791 | autism |
| <i>RNF128</i>  | NM_024539    | NA         | NA       | royalblue | 0.60002 |        |
| <i>ROBO2</i>   | NM_002942    | rs10162548 | 1.37E-03 | royalblue | 0.84665 |        |
| <i>ROM1</i>    | NM_000327    | rs7827230  | 1.68E-02 | royalblue | 0.54295 |        |
| <i>RPL13</i>   | NM_033251    | rs9310061  | 4.85E-02 | royalblue | 0.52016 |        |
| <i>RPL14</i>   | NM_001034996 | rs2852753  | 2.88E-02 | royalblue | 0.19890 |        |

Supplementary Table 6

|                 |              |            |          |           |         |        |
|-----------------|--------------|------------|----------|-----------|---------|--------|
| <i>RPL23A</i>   | NM_000984    | rs13435868 | 2.54E-02 | royalblue | 0.33125 |        |
| <i>RPL36</i>    | NM_015414    | rs1430004  | 9.11E-03 | royalblue | 0.45015 |        |
| <i>RPL8</i>     | NM_033301    | rs445122   | 1.02E-01 | royalblue | 0.86477 |        |
| <i>RPP25</i>    | NM_017793    | rs1481853  | 4.93E-03 | royalblue | 0.80286 |        |
| <i>RPS24</i>    | NM_001026    | rs228513   | 1.18E-02 | royalblue | 0.67025 |        |
| <i>RPS6KA2</i>  | NM_021135    | rs355186   | 2.61E-03 | royalblue | 0.40305 | autism |
| <i>RPS6KA2</i>  | NM_021135    | rs355186   | 2.61E-03 | royalblue | 0.66595 |        |
| <i>RRAGB</i>    | NM_006064    | NA         | NA       | royalblue | 0.67387 |        |
| <i>RSBN1</i>    | NM_018364    | rs9374425  | 3.99E-03 | royalblue | 0.86623 |        |
| <i>RSU1</i>     | NM_152724    | rs4321183  | 9.42E-04 | royalblue | 0.27206 |        |
| <i>RTKN</i>     | NM_001015056 | rs6700161  | 2.10E-02 | royalblue | 0.42532 |        |
| <i>RTN1</i>     | NM_021136    | rs6850334  | 2.73E-05 | royalblue | 0.62568 |        |
| <i>RUVBL1</i>   | NM_003707    | rs3807120  | 5.20E-04 | royalblue | 0.82142 |        |
| <i>S100A11</i>  | NM_005620    | rs12209310 | 5.99E-02 | royalblue | 0.73503 |        |
| <i>S100A13</i>  | NM_001024210 | rs2071262  | 5.24E-03 | royalblue | 0.22408 |        |
| <i>SAMD9L</i>   | NM_152703    | rs1374475  | 2.70E-03 | royalblue | 0.51128 |        |
| <i>SATB1</i>    | NM_002971    | rs4832433  | 2.86E-03 | royalblue | 0.12690 |        |
| <i>SCD5</i>     | NM_001037582 | rs11139500 | 1.35E-03 | royalblue | 0.35749 |        |
| <i>SCFD2</i>    | NM_152540    | rs2397376  | 4.77E-04 | royalblue | 0.52420 | autism |
| <i>SCGN</i>     | NM_006998    | rs4787774  | 2.93E-03 | royalblue | 0.94059 |        |
| <i>SCLY</i>     | NM_016510    | rs2152556  | 6.56E-02 | royalblue | 0.42837 |        |
| <i>SCUBE2</i>   | NM_020974    | rs11715608 | 8.31E-04 | royalblue | 0.53262 |        |
| <i>SELENBP1</i> | NM_003944    | rs11938874 | 8.23E-03 | royalblue | 0.71884 |        |
| <i>SEMA5B</i>   | NM_001031702 | rs10934622 | 9.94E-05 | royalblue | 0.98899 |        |
| <i>SERINC2</i>  | NM_178865    | rs9567440  | 2.15E-02 | royalblue | 0.24671 |        |
| <i>SERPINA3</i> | NM_001085    | rs279968   | 1.04E-02 | royalblue | 0.85798 |        |
| <i>SERTAD4</i>  | NM_019605    | rs1473696  | 6.71E-02 | royalblue | 0.51253 |        |
| <i>SESN3</i>    | NM_144665    | rs11021062 | 3.33E-04 | royalblue | 0.36373 |        |
| <i>SETBP1</i>   | NM_015559    | rs764444   | 9.46E-04 | royalblue | 0.48310 |        |
| <i>SEZ6</i>     | NM_178860    | rs9809320  | 1.75E-02 | royalblue | 0.43073 |        |
| <i>SFXN2</i>    | NM_178858    | rs9655780  | 4.57E-02 | royalblue | 0.38208 |        |
| <i>SGK</i>      | NM_005627    | NA         | NA       | royalblue | 0.80440 |        |
| <i>SH3BGRL2</i> | NM_031469    | rs4945473  | 3.91E-03 | royalblue | 0.96889 |        |
| <i>SH3D19</i>   | NM_001009555 | rs10952377 | 4.47E-03 | royalblue | 0.48195 |        |
| <i>SH3PXD2B</i> | NM_001017995 | rs17283355 | 5.62E-03 | royalblue | 0.40234 |        |
| <i>SHC1</i>     | NM_183001    | rs2239466  | 2.27E-03 | royalblue | 0.42501 |        |
| <i>SHD</i>      | NM_020209    | rs12248154 | 4.03E-03 | royalblue | 0.80325 |        |
| <i>SHKBP1</i>   | NM_138392    | rs393569   | 1.14E-02 | royalblue | 0.42026 |        |
| <i>SHQ1</i>     | NM_018130    | rs7618979  | 3.44E-03 | royalblue | 0.61898 |        |
| <i>SIPA1</i>    | NM_1532538   | NA         | NA       | royalblue | 0.12950 |        |
| <i>SIPA1</i>    | NM_1532538   | NA         | NA       | royalblue | 0.43116 |        |
| <i>SKP2</i>     | NM_005983    | rs4833144  | 1.24E-04 | royalblue | 0.66039 |        |
| <i>SKP2</i>     | NM_032637    | rs4833144  | 1.24E-04 | royalblue | 0.53215 |        |
| <i>SLC13A5</i>  | NM_177550    | rs6597220  | 2.26E-02 | royalblue | 0.84157 |        |
| <i>SLC16A9</i>  | NM_194298    | rs6011530  | 1.02E-03 | royalblue | 0.90572 |        |
| <i>SLC17A8</i>  | NM_139319    | rs7016814  | 5.29E-03 | royalblue | 0.34195 |        |
| <i>SLC19A1</i>  | NM_003056    | NA         | NA       | royalblue | 0.51488 |        |
| <i>SLC22A18</i> | NM_002555    | rs11251532 | 3.96E-03 | royalblue | 0.83015 |        |
| <i>SLC25A10</i> | NM_012140    | rs11622293 | 4.00E-03 | royalblue | 0.50534 |        |

Supplementary Table 6

|                   |           |            |          |           |         |        |
|-------------------|-----------|------------|----------|-----------|---------|--------|
| <i>SLC26A6</i>    | NM_134426 | rs752870   | 3.68E-02 | royalblue | 0.30717 |        |
| <i>SLC26A6</i>    | NM_134426 | rs752870   | 3.68E-02 | royalblue | 0.14009 |        |
| <i>SLC26A7</i>    | NM_052832 | rs9294508  | 2.68E-03 | royalblue | 0.55932 |        |
| <i>SLC29A1</i>    | NM_004955 | rs4942369  | 8.99E-03 | royalblue | 0.39297 |        |
| <i>SLC29A2</i>    | NM_001532 | rs264682   | 5.46E-02 | royalblue | 0.30603 |        |
| <i>SLC2A13</i>    | NM_052885 | rs2154778  | 8.11E-04 | royalblue | 0.25733 |        |
| <i>SLC2A5</i>     | NM_003039 | rs11715608 | 8.31E-04 | royalblue | 0.81716 |        |
| <i>SLC2A6</i>     | NM_017585 | rs4625063  | 1.04E-03 | royalblue | 0.81130 |        |
| <i>SLC35F2</i>    | NM_017515 | rs502398   | 6.69E-05 | royalblue | 0.53903 |        |
| <i>SLC38A1</i>    | NM_030674 | rs718798   | 1.35E-03 | royalblue | 0.55155 |        |
| <i>SLC38A1</i>    | NM_030674 | rs718798   | 1.35E-03 | royalblue | 0.43452 |        |
| <i>SLC43A3</i>    | NM_017611 | rs10489618 | 3.84E-02 | royalblue | 0.42454 |        |
| <i>SLC43A3</i>    | NM_199329 | rs10489618 | 3.84E-02 | royalblue | 0.12804 |        |
| <i>SLC44A1</i>    | NM_022109 | NA         | NA       | royalblue | 0.92744 |        |
| <i>SLC44A5</i>    | NM_152697 | rs2160880  | 1.85E-03 | royalblue | 0.59638 |        |
| <i>SLC6A11</i>    | NM_014229 | rs1807318  | 3.84E-04 | royalblue | 0.14264 |        |
| <i>SLC6A20</i>    | NM_020208 | rs13033787 | 1.09E-02 | royalblue | 0.10989 |        |
| <i>SLC6A20</i>    | NM_020208 | rs13033787 | 1.09E-02 | royalblue | 0.48470 |        |
| <i>SLC8A3</i>     | NM_183002 | rs17086457 | 8.19E-04 | royalblue | 0.63020 |        |
| <i>SLC9A9</i>     | NM_173653 | rs879740   | 4.60E-03 | royalblue | 0.84129 | autism |
| <i>SLCO4A1</i>    | NM_016354 | rs1574119  | 7.14E-03 | royalblue | 0.45441 |        |
| <i>SMAD6</i>      | NM_005585 | rs10132229 | 9.16E-03 | royalblue | 0.44392 |        |
| <i>SMOC2</i>      | NM_022138 | rs10936537 | 2.50E-05 | royalblue | 0.71663 |        |
| <i>SMYD3</i>      | NM_022743 | rs10924537 | 2.01E-02 | royalblue | 0.79387 |        |
| <i>SNCA</i>       | NM_000345 | rs17731311 | 1.02E-03 | royalblue | 0.78856 |        |
| <i>SNCA</i>       | NM_007308 | rs17731311 | 1.02E-03 | royalblue | 0.89367 |        |
| <i>SNF1LK</i>     | NM_173354 | NA         | NA       | royalblue | 0.68980 |        |
| <i>SNTG1</i>      | NM_018967 | rs1028145  | 8.24E-05 | royalblue | 0.74060 |        |
| <i>SNX5</i>       | NM_152227 | rs7119188  | 5.06E-04 | royalblue | 0.76742 |        |
| <i>SOCS2</i>      | NM_003877 | rs1015197  | 7.48E-03 | royalblue | 0.88713 |        |
| <i>SORD</i>       | NM_003104 | rs1027413  | 2.09E-02 | royalblue | 0.48750 |        |
| <i>SORT1</i>      | NM_002959 | rs1811388  | 3.70E-03 | royalblue | 0.76989 |        |
| <i>SPAG9</i>      | NM_172345 | NA         | NA       | royalblue | 0.52347 |        |
| <i>SPATA13</i>    | NM_153023 | rs2828169  | 1.35E-03 | royalblue | 0.23555 |        |
| <i>SPATA6</i>     | NM_019073 | rs2255532  | 1.51E-03 | royalblue | 0.62632 |        |
| <i>SPC25</i>      | NM_020675 | rs13215678 | 1.92E-02 | royalblue | 0.52052 |        |
| <i>SPEN</i>       | NM_015001 | rs17487930 | 1.01E-02 | royalblue | 0.55765 |        |
| <i>SPON1</i>      | NM_006108 | rs11023030 | 1.12E-03 | royalblue | 0.98731 |        |
| <i>SRD5A1</i>     | NM_001047 | rs1054060  | 4.04E-03 | royalblue | 0.67696 |        |
| <i>SRPX2</i>      | NM_014467 | NA         | NA       | royalblue | 0.78862 |        |
| <i>SSBP3</i>      | NM_018070 | rs2126756  | 7.34E-03 | royalblue | 0.71864 |        |
| <i>SSH2</i>       | NM_033389 | rs859202   | 5.28E-04 | royalblue | 0.57575 |        |
| <i>SSSCA1</i>     | NM_006396 | rs11735072 | 2.52E-02 | royalblue | 0.54935 |        |
| <i>ST18</i>       | NM_014682 | rs10418719 | 8.32E-04 | royalblue | 0.84101 |        |
| <i>ST3GAL6</i>    | NM_006100 | rs11613360 | 3.74E-03 | royalblue | 0.52512 |        |
| <i>ST6GALNAC5</i> | NM_030965 | rs10162548 | 1.37E-03 | royalblue | 0.34181 |        |
| <i>STAC2</i>      | NM_198993 | rs9292557  | 1.94E-03 | royalblue | 0.44235 |        |
| <i>STAT4</i>      | NM_003151 | rs7601754  | 5.94E-03 | royalblue | 0.44836 |        |
| <i>STC1</i>       | NM_003155 | rs2828169  | 1.35E-03 | royalblue | 0.90289 |        |

Supplementary Table 6

|                |              |            |          |           |         |
|----------------|--------------|------------|----------|-----------|---------|
| <i>STIM1</i>   | NM_003156    | rs13338087 | 2.44E-03 | royalblue | 0.43799 |
| <i>STXBP6</i>  | NM_014178    | rs9553499  | 2.13E-03 | royalblue | 0.98761 |
| <i>SULF1</i>   | NM_015170    | rs902726   | 1.23E-03 | royalblue | 0.96785 |
| <i>SUSD4</i>   | NM_001037175 | rs851212   | 1.69E-02 | royalblue | 0.64704 |
| <i>SYDE1</i>   | NM_033025    | rs433463   | 6.55E-03 | royalblue | 0.64918 |
| <i>SYT6</i>    | NM_205848    | rs12201804 | 2.28E-03 | royalblue | 0.92277 |
| <i>SYTL5</i>   | NM_138780    | NA         | NA       | royalblue | 0.48422 |
| <i>TAC3</i>    | NM_001006667 | NA         | NA       | royalblue | 0.85804 |
| <i>TAGLN2</i>  | NM_003564    | rs1432679  | 1.85E-02 | royalblue | 0.73951 |
| <i>TARBP2</i>  | NM_134324    | rs2456207  | 4.36E-03 | royalblue | 0.53124 |
| <i>TBC1D9</i>  | NM_015130    | rs253438   | 2.11E-04 | royalblue | 0.50010 |
| <i>TCEB3</i>   | NM_003198    | rs9965582  | 1.61E-03 | royalblue | 0.47487 |
| <i>TCF4</i>    | NM_003199    | rs8017705  | 3.36E-03 | royalblue | 0.55462 |
| <i>TCN2</i>    | NM_000355    | rs2175835  | 1.03E-02 | royalblue | 0.33154 |
| <i>TCP1</i>    | NM_030752    | rs1604643  | 2.52E-03 | royalblue | 0.60985 |
| <i>TEAD4</i>   | NM_003213    | rs8078781  | 1.59E-04 | royalblue | 0.17707 |
| <i>TEAD4</i>   | NM_201441    | rs8078781  | 1.59E-04 | royalblue | 0.59790 |
| <i>TF</i>      | NM_001063    | rs6430516  | 3.38E-02 | royalblue | 1.00000 |
| <i>TFB1M</i>   | NM_016020    | rs2209354  | 9.46E-04 | royalblue | 0.63214 |
| <i>TFPI</i>    | NM_006287    | rs172818   | 1.03E-03 | royalblue | 0.81167 |
| <i>TFPI</i>    | NM_001032281 | rs322405   | 8.35E-03 | royalblue | 0.56206 |
| <i>TGFB111</i> | NM_015927    | rs207410   | 2.15E-02 | royalblue | 0.43863 |
| <i>THBS4</i>   | NM_003248    | rs7171517  | 2.38E-03 | royalblue | 0.52057 |
| <i>THG1L</i>   | NM_017872    | rs9307938  | 3.87E-06 | royalblue | 0.23898 |
| <i>TIAM2</i>   | NM_001010927 | rs2209354  | 9.46E-04 | royalblue | 0.97464 |
| <i>TIMM8A</i>  | NM_004085    | NA         | NA       | royalblue | 0.19996 |
| <i>TJP2</i>    | NM_004817    | rs212165   | 2.00E-03 | royalblue | 0.16068 |
| <i>TLE4</i>    | NM_007005    | rs4842935  | 3.19E-03 | royalblue | 0.34166 |
| <i>TM4SF1</i>  | NM_014220    | rs10935749 | 8.41E-02 | royalblue | 0.97038 |
| <i>TM4SF18</i> | NM_138786    | rs9831865  | 7.15E-03 | royalblue | 0.68914 |
| <i>TMEM100</i> | NM_018286    | rs6561644  | 2.03E-02 | royalblue | 0.25008 |
| <i>TMEM109</i> | NM_024092    | rs1570023  | 6.84E-02 | royalblue | 0.82149 |
| <i>TMEM154</i> | NM_152680    | rs10752611 | 4.22E-02 | royalblue | 0.86057 |
| <i>TMEM46</i>  | NM_001007538 | NA         | NA       | royalblue | 0.90694 |
| <i>TMEM48</i>  | NM_018087    | rs17232701 | 1.79E-03 | royalblue | 0.53202 |
| <i>TMEM51</i>  | NM_018022    | rs6921502  | 4.85E-03 | royalblue | 0.45939 |
| <i>TMEM55A</i> | NM_018710    | rs17265668 | 4.76E-03 | royalblue | 0.43637 |
| <i>TMEM64</i>  | NM_001008495 | rs10010423 | 2.32E-02 | royalblue | 0.40550 |
| <i>TMEM71</i>  | NM_144649    | rs10165601 | 9.66E-03 | royalblue | 0.41829 |
| <i>TMEM86A</i> | NM_153347    | rs801521   | 2.36E-03 | royalblue | 0.31155 |
| <i>TMEM88</i>  | NM_203411    | rs7202021  | 7.38E-03 | royalblue | 0.36695 |
| <i>TMEM91</i>  | NM_001042595 | rs6609437  | 2.19E-02 | royalblue | 0.33119 |
| <i>TMEM97</i>  | NM_014573    | rs2116227  | 5.35E-03 | royalblue | 0.90303 |
| <i>TMPRSS5</i> | NM_030770    | rs6537756  | 2.18E-02 | royalblue | 0.67864 |
| <i>TMPRSS7</i> | XM_938469    | NA         | NA       | royalblue | 0.25868 |
| <i>TMTC2</i>   | NM_152588    | rs1079242  | 1.06E-03 | royalblue | 0.58720 |
| <i>TMTC4</i>   | NM_032813    | rs6706188  | 3.31E-03 | royalblue | 0.59321 |
| <i>TMTC4</i>   | NM_032813    | rs6706188  | 3.31E-03 | royalblue | 0.63819 |
| <i>TNFAIP8</i> | NM_001077654 | rs2782209  | 2.02E-03 | royalblue | 0.44496 |

Supplementary Table 6

|                  |              |            |          |           |         |
|------------------|--------------|------------|----------|-----------|---------|
| <i>TNFRSF10A</i> | NM_003844    | rs5970701  | 2.73E-03 | royalblue | 0.33935 |
| <i>TNRC4</i>     | NM_007185    | NA         | NA       | royalblue | 0.89344 |
| <i>TNRC9</i>     | NM_001080430 | NA         | NA       | royalblue | 0.90432 |
| <i>TNS1</i>      | NM_022648    | rs3791943  | 2.91E-03 | royalblue | 0.81444 |
| <i>TNS3</i>      | NM_022748    | rs7324484  | 1.04E-03 | royalblue | 0.80304 |
| <i>TOLLIP</i>    | NM_019009    | rs4975596  | 1.69E-03 | royalblue | 0.62127 |
| <i>TP53I11</i>   | NM_006034    | rs718798   | 1.35E-03 | royalblue | 0.34425 |
| <i>TPM2</i>      | NM_003289    | rs12471144 | 3.83E-03 | royalblue | 0.89733 |
| <i>TPM3</i>      | NM_153649    | rs2870518  | 1.16E-02 | royalblue | 0.55227 |
| <i>TPP1</i>      | NM_000391    | rs2555141  | 2.76E-04 | royalblue | 0.90899 |
| <i>TRAF7</i>     | NM_032271    | rs6972752  | 7.25E-03 | royalblue | 0.23664 |
| <i>TRIM13</i>    | NM_001007278 | rs6987448  | 2.62E-03 | royalblue | 0.31509 |
| <i>TRIM5</i>     | NM_033034    | rs1430004  | 9.11E-03 | royalblue | 0.53867 |
| <i>TRIM5</i>     | NM_033093    | rs1430004  | 9.11E-03 | royalblue | 0.68832 |
| <i>TRIM52</i>    | NM_032765    | rs767002   | 7.90E-02 | royalblue | 0.25519 |
| <i>TRIP10</i>    | NM_004240    | rs1054060  | 4.04E-03 | royalblue | 0.64130 |
| <i>TRO</i>       | NM_177557    | NA         | NA       | royalblue | 0.53699 |
| <i>TRPM3</i>     | NM_001007470 | rs1192250  | 1.34E-03 | royalblue | 0.49640 |
| <i>TRUB2</i>     | NM_015679    | rs7301892  | 3.88E-04 | royalblue | 0.27925 |
| <i>TSPAN14</i>   | NM_030927    | rs12828323 | 8.19E-03 | royalblue | 0.36964 |
| <i>TSPAN15</i>   | NM_012339    | rs1002171  | 8.07E-03 | royalblue | 0.60119 |
| <i>TSPYL2</i>    | NM_022117    | NA         | NA       | royalblue | 0.51863 |
| <i>TSRC1</i>     | NM_025008    | NA         | NA       | royalblue | 0.50291 |
| <i>TSRC1</i>     | NM_025008    | NA         | NA       | royalblue | 0.33227 |
| <i>TTC14</i>     | NM_133462    | rs966299   | 6.80E-02 | royalblue | 0.40826 |
| <i>TTC14</i>     | NM_133462    | rs966299   | 6.80E-02 | royalblue | 0.32345 |
| <i>TTLL12</i>    | NM_015140    | rs9999533  | 8.95E-03 | royalblue | 0.55786 |
| <i>TTLL3</i>     | NM_015644    | NA         | NA       | royalblue | 0.23517 |
| <i>TXNIP</i>     | NM_006472    | rs5966481  | 7.94E-02 | royalblue | 0.52626 |
| <i>UBE1</i>      | NM_153280    | NA         | NA       | royalblue | 0.26894 |
| <i>UBE2L6</i>    | NM_198183    | rs7544695  | 9.77E-03 | royalblue | 0.27960 |
| <i>UCHL5</i>     | NM_015984    | rs2286896  | 8.31E-02 | royalblue | 0.69498 |
| <i>UIP1</i>      | NM_207107    | NA         | NA       | royalblue | 0.35943 |
| <i>UNG</i>       | NM_080911    | rs4397377  | 1.43E-02 | royalblue | 0.43485 |
| <i>UNQ3045</i>   | NM_207409    | NA         | NA       | royalblue | 0.45937 |
| <i>UNQ5810</i>   | NM_207384    | NA         | NA       | royalblue | 0.48433 |
| <i>UPB1</i>      | NM_016327    | rs7218952  | 1.98E-03 | royalblue | 0.48889 |
| <i>URP2</i>      | NM_031471    | NA         | NA       | royalblue | 0.14234 |
| <i>VISA</i>      | NM_020746    | NA         | NA       | royalblue | 0.31798 |
| <i>VLDLR</i>     | NM_001018056 | rs16870061 | 6.02E-03 | royalblue | 0.71924 |
| <i>VMP</i>       | NM_080723    | NA         | NA       | royalblue | 0.81329 |
| <i>VPS13B</i>    | NM_017890    | rs1567663  | 1.52E-03 | royalblue | 0.25087 |
| <i>VPS13D</i>    | NM_015378    | rs16858854 | 3.01E-03 | royalblue | 0.45468 |
| <i>VPS41</i>     | NM_014396    | rs1393109  | 1.17E-03 | royalblue | 0.46096 |
| <i>VPS41</i>     | NM_014396    | rs1393109  | 1.17E-03 | royalblue | 0.28934 |
| <i>VRK1</i>      | NM_003384    | rs772161   | 1.19E-03 | royalblue | 0.63769 |
| <i>VWCE</i>      | NM_152718    | rs13379701 | 2.08E-02 | royalblue | 0.50015 |
| <i>WBSCR17</i>   | NM_022479    | rs1544442  | 1.08E-03 | royalblue | 0.59474 |
| <i>WBSCR27</i>   | NM_152559    | rs7099452  | 2.00E-02 | royalblue | 0.47921 |

Supplementary Table 6

|                 |                 |            |          |           |         |
|-----------------|-----------------|------------|----------|-----------|---------|
| <i>WDR12</i>    | NM_018256       | rs17406900 | 2.45E-01 | royalblue | 0.90662 |
| <i>WDR67</i>    | NM_145647       | rs10934622 | 9.94E-05 | royalblue | 0.36036 |
| <i>WNK2</i>     | NM_006648       | rs4379388  | 1.23E-03 | royalblue | 0.70345 |
| <i>WNK4</i>     | NM_032387       | rs2609463  | 6.34E-03 | royalblue | 0.85975 |
| <i>XKR8</i>     | NM_018053       | rs1389155  | 7.18E-03 | royalblue | 0.56024 |
| <i>XRCC3</i>    | NM_005432       | rs12314194 | 3.33E-03 | royalblue | 0.65242 |
| <i>XTP3TPA</i>  | NM_024096       | NA         | NA       | royalblue | 0.66651 |
| <i>YAF2</i>     | NM_001012424    | NA         | NA       | royalblue | 0.63185 |
| <i>YWHAB</i>    | NM_003404       | rs7558605  | 1.43E-02 | royalblue | 0.54893 |
| <i>ZMYND11</i>  | NM_212479       | rs727056   | 2.01E-03 | royalblue | 0.32596 |
| <i>ZNF10</i>    | NM_015394       | rs10488211 | 1.78E-02 | royalblue | 0.55750 |
| <i>ZNF135</i>   | NM_003436       | rs4557294  | 3.45E-03 | royalblue | 0.61018 |
| <i>ZNF235</i>   | NM_004234       | rs6987448  | 2.62E-03 | royalblue | 0.39828 |
| <i>ZNF254</i>   | NM_004876       | NA         | NA       | royalblue | 0.48030 |
| <i>ZNF264</i>   | NM_003417       | rs6551665  | 1.34E-03 | royalblue | 0.37854 |
| <i>ZNF274</i>   | NM_016324       | rs7145302  | 2.64E-02 | royalblue | 0.70198 |
| <i>ZNF287</i>   | NM_020653       | rs12740413 | 3.85E-03 | royalblue | 0.45904 |
| <i>ZNF300</i>   | NM_052860       | rs5970014  | 4.51E-02 | royalblue | 0.51747 |
| <i>ZNF346</i>   | NM_012279       | rs7615453  | 7.38E-03 | royalblue | 0.21528 |
| <i>ZNF350</i>   | NM_021632       | rs950844   | 1.89E-02 | royalblue | 0.46468 |
| <i>ZNF395</i>   | NM_018660       | rs2092018  | 2.59E-03 | royalblue | 0.87731 |
| <i>ZNF471</i>   | NM_020813       | rs17291829 | 2.46E-02 | royalblue | 0.44677 |
| <i>ZNF493</i>   | NM_001076678    | rs7003897  | 2.76E-03 | royalblue | 0.13266 |
| <i>ZNF533</i>   | NM_152520       | NA         | NA       | royalblue | 0.21841 |
| <i>ZNF585A</i>  | NM_199126       | rs1359186  | 5.54E-03 | royalblue | 0.64284 |
| <i>ZNF713</i>   | NM_182633       | rs17150526 | 9.71E-03 | royalblue | 0.26980 |
| <i>ZSCAN2</i>   | NM_001007072    | rs9602198  | 2.10E-03 | royalblue | 0.21041 |
| <i>ZSCAN2</i>   | NM_017894       | rs12998947 | 6.99E-03 | royalblue | 0.13354 |
| <i>ZWILCH</i>   | NM_017975       | rs8052896  | 8.45E-03 | royalblue | 0.53741 |
|                 | 4-Mar NM_178450 | NA         | NA       | salmon    | 0.98132 |
|                 | 4-Mar NM_178450 | NA         | NA       | salmon    | 0.75655 |
|                 | 4-Mar XM_938009 | NA         | NA       | salmon    | 0.98178 |
| <i>ABCC3</i>    | NM_020037       | NA         | NA       | salmon    | 0.73405 |
| <i>ABCE1</i>    | NM_001040876    | rs471172   | 9.45E-02 | salmon    | 0.77419 |
| <i>ACYP2</i>    | NM_138448       | rs1498821  | 3.94E-04 | salmon    | 0.71230 |
| <i>ALS2CR13</i> | NM_173511       | NA         | NA       | salmon    | 0.71367 |
| <i>AMMECR1</i>  | NM_001025580    | NA         | NA       | salmon    | 0.77389 |
| <i>AMMECR1</i>  | NM_001025580    | NA         | NA       | salmon    | 0.84120 |
| <i>ANG</i>      | NM_001145       | rs10811336 | 6.91E-04 | salmon    | 0.92163 |
| <i>ANTXR2</i>   | NM_058172       | rs2123268  | 4.99E-03 | salmon    | 0.48048 |
| <i>ANXA2</i>    | NM_001002857    | rs10515989 | 6.29E-03 | salmon    | 0.93777 |
| <i>APBA2</i>    | NM_005503       | rs11015249 | 4.52E-03 | salmon    | 0.55555 |
| <i>APCDD1</i>   | NM_153000       | rs10946418 | 2.38E-03 | salmon    | 0.81527 |
| <i>APLP1</i>    | NM_005166       | rs325833   | 1.03E-02 | salmon    | 0.46205 |
| <i>AQP11</i>    | NM_173039       | rs12630466 | 1.87E-03 | salmon    | 0.80031 |
| <i>ARHGDI3</i>  | NM_001175       | rs5980109  | 1.83E-03 | salmon    | 0.79818 |
| <i>ARSG</i>     | NM_014960       | rs2286614  | 1.30E-03 | salmon    | 0.49571 |
| <i>ARSJ</i>     | NM_024590       | rs8453     | 4.20E-03 | salmon    | 0.97663 |
| <i>ARX</i>      | NM_139058       | NA         | NA       | salmon    | 0.79918 |

autism &amp; epilepsy



Supplementary Table 6

|                  |              |            |          |        |         |          |
|------------------|--------------|------------|----------|--------|---------|----------|
| <i>B3GALT4</i>   | NM_003782    | rs1187061  | 9.45E-03 | salmon | 0.51525 |          |
| <i>B3GNT1</i>    | NM_006577    | NA         | NA       | salmon | 0.62362 |          |
| <i>BAZ1A</i>     | NM_182648    | rs5971861  | 4.99E-03 | salmon | 0.67610 |          |
| <i>BCCIP</i>     | NM_078468    | rs6534554  | 7.29E-02 | salmon | 0.71209 |          |
| <i>BCL11A</i>    | NM_138559    | rs7071102  | 6.66E-03 | salmon | 0.88197 |          |
| <i>BCL11B</i>    | NM_022898    | rs10893131 | 5.51E-03 | salmon | 0.89832 |          |
| <i>BLM</i>       | NM_000057    | rs4552364  | 2.42E-03 | salmon | 0.47282 |          |
| <i>BMPR1B</i>    | NM_001203    | rs749458   | 8.79E-04 | salmon | 0.54202 |          |
| <i>BTN3A1</i>    | NM_007048    | rs9512503  | 1.41E-03 | salmon | 0.77830 |          |
| <i>BXDC2</i>     | NM_018321    | NA         | NA       | salmon | 0.74051 |          |
| <i>BYSL</i>      | NM_004053    | rs665657   | 6.82E-03 | salmon | 0.82212 |          |
| <i>C10orf107</i> | NM_173554    | rs11520658 | 8.13E-03 | salmon | 0.76347 |          |
| <i>C10orf32</i>  | NM_144591    | rs1449045  | 1.46E-02 | salmon | 0.90634 |          |
| <i>C10orf65</i>  | NM_138413    | NA         | NA       | salmon | 0.73803 |          |
| <i>C14orf130</i> | NM_175748    | NA         | NA       | salmon | 0.65870 |          |
| <i>C14orf44</i>  | NM_152445    | NA         | NA       | salmon | 0.48368 |          |
| <i>C1QTNF4</i>   | NM_031909    | rs1410117  | 3.98E-03 | salmon | 0.49941 |          |
| <i>C21orf62</i>  | NM_019596    | rs4799438  | 1.08E-02 | salmon | 0.85738 |          |
| <i>C2orf11</i>   | NM_144629    | NA         | NA       | salmon | 0.91255 |          |
| <i>C4orf9</i>    | NM_003703    | NA         | NA       | salmon | 0.61649 |          |
| <i>C5orf4</i>    | NM_016348    | NA         | NA       | salmon | 0.88803 |          |
| <i>C6orf134</i>  | NM_024909    | NA         | NA       | salmon | 0.89256 |          |
| <i>C8orf70</i>   | NM_016010    | NA         | NA       | salmon | 0.61180 |          |
| <i>C9orf45</i>   | NM_030814    | NA         | NA       | salmon | 0.69264 |          |
| <i>C9orf88</i>   | NM_022833    | rs12414590 | 1.73E-03 | salmon | 0.53171 |          |
| <i>CALCOCO1</i>  | NM_020898    | rs8030739  | 2.47E-03 | salmon | 0.40905 |          |
| <i>CAMK2D</i>    | NM_172115    | rs987694   | 1.13E-03 | salmon | 0.75686 |          |
| <i>CAMK2D</i>    | NM_172128    | rs987694   | 1.13E-03 | salmon | 0.68906 |          |
| <i>CAMTA1</i>    | NM_015215    | rs12448409 | 5.66E-06 | salmon | 0.97286 |          |
| <i>CAPN2</i>     | NM_001748    | rs751128   | 1.38E-02 | salmon | 0.58404 |          |
| <i>CASC1</i>     | NM_018272    | rs12893752 | 8.55E-03 | salmon | 0.60935 |          |
| <i>CD74</i>      | NM_001025158 | rs11797944 | 7.37E-03 | salmon | 0.51594 |          |
| <i>CD74</i>      | NM_004355    | rs11797944 | 7.37E-03 | salmon | 0.52091 |          |
| <i>CDCA1</i>     | NM_145697    | rs211002   | 4.48E-03 | salmon | 0.40388 |          |
| <i>CDK2</i>      | NM_001798    | rs11003452 | 1.17E-02 | salmon | 0.67420 |          |
| <i>CGI-115</i>   | NM_016052    | NA         | NA       | salmon | 0.88561 |          |
| <i>CHI3L2</i>    | NM_004000    | rs2289321  | 1.75E-03 | salmon | 0.96728 |          |
| <i>CMKOR1</i>    | NM_020311    | rs6689433  | 3.09E-02 | salmon | 0.96233 |          |
| <i>CNAP1</i>     | NM_014865    | NA         | NA       | salmon | 0.38820 |          |
| <i>CNIH3</i>     | NM_152495    | rs4654060  | 2.50E-02 | salmon | 0.82846 |          |
| <i>CSNK1D</i>    | NM_139062    | rs9343544  | 9.36E-03 | salmon | 0.53336 |          |
| <i>CTNNAL1</i>   | NM_003798    | rs7782005  | 4.21E-03 | salmon | 0.80483 |          |
| <i>CXCR7</i>     | NM_001047841 | NA         | NA       | salmon | 0.97111 |          |
| <i>CXorf44</i>   | NM_138362    | NA         | NA       | salmon | 0.89882 |          |
| <i>DCX</i>       | NM_178151    | NA         | NA       | salmon | 0.84994 | epilepsy |
| <i>DDIT4</i>     | NM_019058    | rs10506680 | 9.80E-02 | salmon | 0.66947 |          |
| <i>DDX54</i>     | NM_024072    | rs11102329 | 4.76E-03 | salmon | 0.58515 |          |
| <i>DHCR24</i>    | NM_014762    | rs4239673  | 7.21E-03 | salmon | 0.77958 |          |
| <i>DHX37</i>     | NM_032656    | rs736456   | 3.32E-03 | salmon | 0.70093 |          |

Supplementary Table 6

|                 |              |            |          |        |         |                   |
|-----------------|--------------|------------|----------|--------|---------|-------------------|
| <i>DIAPH3</i>   | NM_030932    | rs6850334  | 2.73E-05 | salmon | 0.45042 |                   |
| <i>DNAJB9</i>   | NM_012328    | rs6594323  | 7.59E-03 | salmon | 0.85848 |                   |
| <i>DTL</i>      | NM_016448    | rs3738449  | 1.17E-01 | salmon | 0.33101 |                   |
| <i>ELAVL3</i>   | NM_001420    | rs2454803  | 2.37E-02 | salmon | 0.71460 |                   |
| <i>EMP1</i>     | NM_001423    | rs7740162  | 1.42E-03 | salmon | 0.72328 |                   |
| <i>EPB41L1</i>  | NM_012156    | rs4829329  | 7.06E-03 | salmon | 0.57391 |                   |
| <i>ETFB</i>     | NM_001014763 | rs4802787  | 2.64E-03 | salmon | 0.79335 |                   |
| <i>ETV4</i>     | NM_001986    | rs7981122  | 4.30E-03 | salmon | 0.85576 |                   |
| <i>ETV4</i>     | NM_001986    | rs7981122  | 4.30E-03 | salmon | 0.84733 |                   |
| <i>F2RL1</i>    | NM_005242    | rs4324976  | 1.38E-02 | salmon | 0.64101 |                   |
| <i>FAM129B</i>  | NM_001035534 | rs12414590 | 1.73E-03 | salmon | 0.66752 |                   |
| <i>FAM14A</i>   | NM_032036    | NA         | NA       | salmon | 0.75356 |                   |
| <i>FGF11</i>    | NM_004112    | rs6463669  | 3.78E-03 | salmon | 0.66248 |                   |
| <i>FHOD1</i>    | NM_013241    | rs17184725 | 5.24E-02 | salmon | 0.65471 |                   |
| <i>FLJ13391</i> | NM_032181    | NA         | NA       | salmon | 0.82589 |                   |
| <i>FLJ20152</i> | NM_019000    | NA         | NA       | salmon | 0.84710 |                   |
| <i>FLJ30046</i> | NM_144595    | NA         | NA       | salmon | 0.83241 |                   |
| <i>FLJ37440</i> | NM_153214    | NA         | NA       | salmon | 0.49987 |                   |
| <i>FLJ45557</i> | NM_001039762 | NA         | NA       | salmon | 0.55340 |                   |
| <i>FLJ90166</i> | NM_153360    | NA         | NA       | salmon | 0.94776 |                   |
| <i>FMNL3</i>    | NM_198900    | rs7405268  | 1.54E-02 | salmon | 0.61261 |                   |
| <i>FOSL1</i>    | NM_005438    | rs10878503 | 6.50E-02 | salmon | 0.71448 |                   |
| <i>FSTL1</i>    | NM_007085    | rs2781107  | 1.33E-02 | salmon | 0.55509 |                   |
| <i>GABRB3</i>   | XM_937254    | NA         | NA       | salmon | 0.56570 | autism & epilepsy |
| <i>GADD45G</i>  | NM_006705    | rs2013116  | 6.88E-03 | salmon | 0.83415 |                   |
| <i>GDAP1L1</i>  | NM_024034    | rs6672120  | 1.14E-02 | salmon | 0.79711 |                   |
| <i>GNG4</i>     | NM_004485    | rs6431586  | 3.45E-04 | salmon | 0.63124 |                   |
| <i>GNL3</i>     | NM_014366    | rs37787    | 7.65E-03 | salmon | 0.83226 |                   |
| <i>GNL3</i>     | NM_206826    | rs37787    | 7.65E-03 | salmon | 0.82868 |                   |
| <i>GPATCH4</i>  | NM_182679    | rs4352688  | 1.24E-01 | salmon | 0.72914 |                   |
| <i>GPATCH4</i>  | NM_182679    | rs4352688  | 1.24E-01 | salmon | 0.81275 |                   |
| <i>GRWD1</i>    | NM_031485    | rs1288592  | 6.73E-04 | salmon | 0.86156 |                   |
| <i>GSG2</i>     | NM_031965    | rs13270179 | 4.41E-03 | salmon | 0.56404 |                   |
| <i>GSH2</i>     | NM_133267    | NA         | NA       | salmon | 0.34012 |                   |
| <i>HAS3</i>     | NM_005329    | rs7753849  | 4.68E-04 | salmon | 0.80382 |                   |
| <i>HCAP-G</i>   | NM_022346    | NA         | NA       | salmon | 0.47803 |                   |
| <i>HCP5</i>     | NM_006674    | rs2253204  | 1.34E-02 | salmon | 0.84225 |                   |
| <i>HELLS</i>    | NM_018063    | rs9516775  | 1.68E-02 | salmon | 0.57236 |                   |
| <i>HEY2</i>     | NM_012259    | rs9398785  | 1.50E-02 | salmon | 0.55092 |                   |
| <i>HGF</i>      | NM_001010932 | rs6473199  | 6.57E-03 | salmon | 0.62579 |                   |
| <i>HHAT</i>     | NM_018194    | rs2223630  | 2.17E-02 | salmon | 0.43211 |                   |
| <i>HLA-DMB</i>  | NM_002118    | rs154973   | 8.12E-03 | salmon | 0.84728 |                   |
| <i>HLA-DRA</i>  | NM_019111    | rs648166   | 1.71E-03 | salmon | 0.85527 |                   |
| <i>HLA-DRB3</i> | NM_022555    | NA         | NA       | salmon | 0.69819 |                   |
| <i>HMFN0839</i> | NM_032717    | NA         | NA       | salmon | 0.69401 |                   |
| <i>HOMER2</i>   | NM_004839    | rs9986815  | 1.09E-03 | salmon | 1.00000 |                   |
| <i>HSP90AA1</i> | NM_001017963 | rs6539053  | 1.50E-03 | salmon | 0.68034 |                   |
| <i>IFI44L</i>   | NM_006820    | rs7071575  | 2.75E-04 | salmon | 0.70305 |                   |
| <i>IGF2BP2</i>  | NM_006548    | rs2603724  | 1.46E-02 | salmon | 0.78063 |                   |

Supplementary Table 6

|                  |              |            |          |        |         |
|------------------|--------------|------------|----------|--------|---------|
| <i>IGF2BP3</i>   | NM_006547    | rs10757418 | 9.84E-04 | salmon | 0.92406 |
| <i>IKIP</i>      | NM_201612    | NA         | NA       | salmon | 0.51712 |
| <i>IL1RAP</i>    | NM_134470    | rs6434455  | 3.67E-03 | salmon | 0.58537 |
| <i>IL4R</i>      | NM_000418    | rs967144   | 1.52E-03 | salmon | 0.95427 |
| <i>INTS6</i>     | NM_001039938 | rs17504439 | 7.67E-04 | salmon | 0.48921 |
| <i>IPO4</i>      | NM_024658    | rs11564334 | 1.22E-02 | salmon | 0.66025 |
| <i>ISG20</i>     | NM_002201    | rs1010308  | 1.49E-02 | salmon | 0.63798 |
| <i>ISGF3G</i>    | NM_006084    | NA         | NA       | salmon | 0.92284 |
| <i>JPH1</i>      | NM_020647    | rs2688607  | 7.30E-04 | salmon | 0.89738 |
| <i>KCNB1</i>     | NM_004975    | rs7324484  | 1.04E-03 | salmon | 0.62952 |
| <i>KCNJ16</i>    | NM_018658    | rs17827524 | 2.65E-03 | salmon | 0.68655 |
| <i>KCNMA1</i>    | NM_002247    | rs7071575  | 2.75E-04 | salmon | 0.53816 |
| <i>KIAA0427</i>  | NM_014772    | rs9819635  | 2.10E-03 | salmon | 0.81690 |
| <i>KIAA0690</i>  | NM_015179    | NA         | NA       | salmon | 0.57220 |
| <i>KIF11</i>     | NM_004523    | rs203132   | 1.89E-03 | salmon | 0.39985 |
| <i>KIF21B</i>    | NM_017596    | rs4915471  | 5.01E-03 | salmon | 0.55293 |
| <i>KLF11</i>     | XM_938887    | NA         | NA       | salmon | 0.62089 |
| <i>KNTC1</i>     | NM_014708    | rs2809898  | 5.07E-03 | salmon | 0.54279 |
| <i>Kua</i>       | NM_199129    | NA         | NA       | salmon | 0.72219 |
| <i>LEPREL2</i>   | NM_014262    | rs10401027 | 3.77E-04 | salmon | 0.67706 |
| <i>LHPP</i>      | NM_022126    | rs10818964 | 7.06E-03 | salmon | 0.67243 |
| <i>LIN7A</i>     | NM_004664    | rs2373478  | 1.24E-03 | salmon | 0.55906 |
| <i>LMO3</i>      | NM_018640    | rs12221081 | 4.45E-03 | salmon | 0.97339 |
| <i>LNK</i>       | NM_005475    | NA         | NA       | salmon | 0.93082 |
| <i>LOC113179</i> | NM_138422    | NA         | NA       | salmon | 0.42524 |
| <i>LOC144404</i> | XM_0848521   | NA         | NA       | salmon | 0.33531 |
| <i>LOC150084</i> | NM_001080444 | NA         | NA       | salmon | 0.83929 |
| <i>LOC153222</i> | NM_153607    | NA         | NA       | salmon | 0.87445 |
| <i>LOC201229</i> | XM_942296    | NA         | NA       | salmon | 0.46903 |
| <i>LOC352909</i> | NM_001031802 | NA         | NA       | salmon | 0.33653 |
| <i>LOC389816</i> | NM_001013653 | NA         | NA       | salmon | 0.84849 |
| <i>LOC389816</i> | XM_939320    | NA         | NA       | salmon | 0.82633 |
| <i>LOC619208</i> | NM_001033564 | NA         | NA       | salmon | 0.49499 |
| <i>LOC643995</i> | XM_930156    | NA         | NA       | salmon | 0.68003 |
| <i>LOC90639</i>  | NM_001031617 | NA         | NA       | salmon | 0.49426 |
| <i>LPL</i>       | NM_000237    | rs12874295 | 8.48E-03 | salmon | 0.82479 |
| <i>LRRC8C</i>    | NM_032270    | rs490812   | 1.44E-05 | salmon | 0.88658 |
| <i>LTV1</i>      | NM_032860    | rs9386051  | 7.83E-03 | salmon | 0.72841 |
| <i>LYAR</i>      | NM_017816    | rs456859   | 7.47E-03 | salmon | 0.48200 |
| <i>MAP4</i>      | NM_030885    | rs1959545  | 3.01E-03 | salmon | 0.97603 |
| <i>MAPKAP1</i>   | NM_001006618 | rs4646703  | 1.03E-02 | salmon | 0.90456 |
| <i>MAST1</i>     | NM_014975    | rs1024580  | 2.01E-03 | salmon | 0.50024 |
| <i>MCM8</i>      | NM_032485    | rs13257249 | 3.89E-03 | salmon | 0.44410 |
| <i>MEIS2</i>     | NM_170677    | rs4244559  | 1.03E-03 | salmon | 0.77905 |
| <i>MEIS2</i>     | NM_020149    | NA         | NA       | salmon | 0.97647 |
| <i>MGC52110</i>  | NM_001008215 | NA         | NA       | salmon | 0.89903 |
| <i>MLC1</i>      | NM_139202    | rs9535207  | 2.98E-04 | salmon | 0.53774 |
| <i>MLLT7</i>     | NM_005938    | NA         | NA       | salmon | 0.69350 |
| <i>MMP24</i>     | NM_006690    | rs10954906 | 1.42E-03 | salmon | 0.69888 |

Supplementary Table 6

|                |              |            |          |        |         |                   |
|----------------|--------------|------------|----------|--------|---------|-------------------|
| <i>MSH5</i>    | XM_936150    | NA         | NA       | salmon | 0.65947 |                   |
| <i>MST150</i>  | NM_032947    | NA         | NA       | salmon | 0.76353 |                   |
| <i>MSX1</i>    | NM_002448    | rs2570583  | 1.09E-02 | salmon | 0.97243 |                   |
| <i>MT</i>      | NM_173467    | NA         | NA       | salmon | 0.46417 |                   |
| <i>MTHFD1L</i> | NM_015440    | rs11687663 | 3.96E-04 | salmon | 0.82986 |                   |
| <i>MX1</i>     | NM_002462    | rs497561   | 5.03E-03 | salmon | 0.29578 |                   |
| <i>MYCBP2</i>  | NM_015057    | rs1176811  | 1.63E-03 | salmon | 0.63331 |                   |
| <i>MYCN</i>    | NM_005378    | rs3008725  | 1.73E-02 | salmon | 0.76307 |                   |
| <i>MYOM2</i>   | NM_003970    | rs2108636  | 3.73E-03 | salmon | 0.81869 |                   |
| <i>NCALD</i>   | NM_001040626 | rs17035144 | 9.06E-04 | salmon | 0.95430 |                   |
| <i>NCALD</i>   | NM_032041    | rs4135064  | 2.67E-03 | salmon | 0.94279 |                   |
| <i>NDUFV3</i>  | NM_021075    | rs6463175  | 8.12E-03 | salmon | 0.49423 |                   |
| <i>NEFM</i>    | NM_005382    | rs9507503  | 6.28E-03 | salmon | 0.89801 |                   |
| <i>NELL2</i>   | NM_006159    | rs9533761  | 1.46E-03 | salmon | 0.52441 |                   |
| <i>NES</i>     | NM_006617    | rs4621673  | 3.35E-02 | salmon | 0.83028 |                   |
| <i>NKX2-2</i>  | NM_002509    | rs6576599  | 2.41E-02 | salmon | 0.80805 |                   |
| <i>NKX3-1</i>  | NM_006167    | rs1041350  | 9.81E-03 | salmon | 0.45269 |                   |
| <i>NOC2L</i>   | NM_015658    | rs570869   | 9.34E-03 | salmon | 0.59845 |                   |
| <i>NOL1</i>    | NM_006170    | NA         | NA       | salmon | 0.71634 |                   |
| <i>NOL1</i>    | NM_006170    | NA         | NA       | salmon | 0.65180 |                   |
| <i>NOL3</i>    | NM_003946    | rs10498525 | 1.72E-02 | salmon | 0.43478 |                   |
| <i>NOL6</i>    | NM_139235    | rs6462481  | 2.99E-03 | salmon | 0.83917 |                   |
| <i>NOV</i>     | NM_002514    | rs10984184 | 1.01E-01 | salmon | 0.69417 |                   |
| <i>NPC1</i>    | NM_000271    | rs727919   | 2.33E-03 | salmon | 0.51486 |                   |
| <i>NPDC1</i>   | NM_015392    | rs3763662  | 4.10E-03 | salmon | 0.62475 |                   |
| <i>NPTXR</i>   | NM_058178    | NA         | NA       | salmon | 0.44449 |                   |
| <i>NUSAP1</i>  | NM_018454    | rs4237674  | 4.20E-03 | salmon | 0.37018 |                   |
| <i>PARP6</i>   | NM_020213    | NA         | NA       | salmon | 0.80289 |                   |
| <i>PAX6</i>    | NM_001604    | rs10011864 | 4.49E-03 | salmon | 0.59321 |                   |
| <i>PBXIP1</i>  | NM_020524    | rs2239466  | 2.27E-03 | salmon | 0.69929 |                   |
| <i>PDLIM7</i>  | NM_213636    | rs10798623 | 9.50E-02 | salmon | 0.73872 |                   |
| <i>PHF19</i>   | NM_015651    | rs2897737  | 3.36E-02 | salmon | 0.95616 |                   |
| <i>PHF19</i>   | NM_001009936 | rs7841293  | 4.90E-02 | salmon | 0.85547 |                   |
| <i>PHLDA2</i>  | NM_003311    | rs11719615 | 4.78E-03 | salmon | 0.63826 |                   |
| <i>PIF1</i>    | NM_025049    | rs10409409 | 1.57E-03 | salmon | 0.69034 |                   |
| <i>PINK1</i>   | NM_032409    | rs579096   | 1.65E-04 | salmon | 0.87914 |                   |
| <i>PLA2G7</i>  | NM_005084    | rs1413077  | 2.50E-02 | salmon | 0.38034 |                   |
| <i>PLAUR</i>   | NM_001005376 | rs12429253 | 7.70E-03 | salmon | 0.95433 | autism & epilepsy |
| <i>PLAUR</i>   | NM_002659    | rs12429253 | 7.70E-03 | salmon | 0.87118 | autism & epilepsy |
| <i>PLCD1</i>   | NM_006225    | rs17127036 | 1.66E-02 | salmon | 0.52409 |                   |
| <i>PLCL2</i>   | NM_015184    | rs2959618  | 1.92E-03 | salmon | 0.73783 |                   |
| <i>PLEK</i>    | NM_002664    | rs872369   | 2.73E-03 | salmon | 0.87541 |                   |
| <i>PMM2</i>    | NM_000303    | rs4562389  | 5.38E-03 | salmon | 0.67486 |                   |
| <i>POP1</i>    | NM_015029    | rs1441383  | 3.46E-03 | salmon | 0.45185 |                   |
| <i>PPP1R1C</i> | XM_945023    | NA         | NA       | salmon | 0.60424 |                   |
| <i>PRKCDBP</i> | NM_145040    | rs1548842  | 1.35E-03 | salmon | 0.73180 |                   |
| <i>PRMT2</i>   | NM_001535    | rs1077216  | 1.10E-03 | salmon | 0.88581 |                   |
| <i>PRMT2</i>   | NM_206962    | rs1077216  | 1.10E-03 | salmon | 0.80562 |                   |
| <i>PROK2</i>   | NM_021935    | rs12154743 | 9.38E-03 | salmon | 0.51246 |                   |

Supplementary Table 6

|                 |              |            |          |        |         |        |
|-----------------|--------------|------------|----------|--------|---------|--------|
| <i>PRSS23</i>   | NM_007173    | rs1560977  | 1.01E-02 | salmon | 0.84301 |        |
| <i>PSCD1</i>    | NM_017456    | NA         | NA       | salmon | 0.81073 |        |
| <i>PSD</i>      | NM_002779    | rs6978452  | 6.41E-03 | salmon | 0.21459 |        |
| <i>PTPLA</i>    | NM_014241    | rs11683808 | 5.07E-03 | salmon | 0.80567 |        |
| <i>PUS7</i>     | NM_019042    | rs156135   | 2.06E-02 | salmon | 0.82625 |        |
| <i>PVRL3</i>    | NM_015480    | rs7124625  | 1.00E-02 | salmon | 0.90854 |        |
| <i>RAB7L1</i>   | NM_003929    | rs947211   | 7.99E-02 | salmon | 0.91503 |        |
| <i>RAD51</i>    | NM_002875    | rs10512692 | 6.11E-03 | salmon | 0.88891 |        |
| <i>RASEF</i>    | NM_152573    | rs13144896 | 1.33E-02 | salmon | 0.74918 |        |
| <i>RBBP8</i>    | NM_203291    | rs2520355  | 6.82E-04 | salmon | 0.95570 |        |
| <i>RCOR3</i>    | NM_018254    | rs6540679  | 2.26E-01 | salmon | 0.84761 |        |
| <i>RECQL4</i>   | NM_004260    | rs1718075  | 8.40E-02 | salmon | 0.46480 |        |
| <i>RFC3</i>     | NM_181558    | rs10954906 | 1.42E-03 | salmon | 0.79851 |        |
| <i>FGMA</i>     | NM_020211    | rs2013116  | 6.88E-03 | salmon | 0.83559 |        |
| <i>RGN</i>      | NM_152869    | NA         | NA       | salmon | 0.59588 |        |
| <i>RGS16</i>    | NM_002928    | rs3849612  | 2.82E-02 | salmon | 0.80081 |        |
| <i>RGS20</i>    | NM_170587    | rs930185   | 4.24E-03 | salmon | 0.69872 |        |
| <i>RHOJ</i>     | NM_020663    | rs1467422  | 6.27E-04 | salmon | 0.65120 |        |
| <i>RN7SK</i>    | NR_001445    | NA         | NA       | salmon | 0.58946 |        |
| <i>RNF150</i>   | NM_020724    | rs5954988  | 3.49E-03 | salmon | 0.79538 |        |
| <i>RNU3IP2</i>  | NM_004704    | NA         | NA       | salmon | 0.72446 |        |
| <i>S100A16</i>  | NM_080388    | rs2071262  | 5.24E-03 | salmon | 0.84171 |        |
| <i>SAP18</i>    | NM_005870    | rs2073854  | 3.23E-03 | salmon | 0.94200 |        |
| <i>SBK1</i>     | NM_001024401 | rs2614048  | 1.98E-03 | salmon | 0.91863 |        |
| <i>SCG3</i>     | NM_013243    | rs9296619  | 1.78E-02 | salmon | 0.83956 |        |
| <i>SDC2</i>     | NM_002998    | rs16894821 | 7.60E-03 | salmon | 0.66776 | autism |
| <i>SERPINF1</i> | NM_002615    | rs4876121  | 1.76E-02 | salmon | 0.79012 |        |
| <i>SLC40A1</i>  | NM_014585    | rs6733858  | 2.60E-02 | salmon | 0.79669 |        |
| <i>SLC4A7</i>   | NM_003615    | rs10506018 | 4.81E-03 | salmon | 0.77635 |        |
| <i>SMPD3</i>    | NM_018667    | rs9541141  | 1.01E-02 | salmon | 0.70910 |        |
| <i>SNAP25</i>   | NM_130811    | rs11249984 | 8.36E-04 | salmon | 0.40333 |        |
| <i>SOX13</i>    | NM_005686    | rs2037679  | 2.76E-02 | salmon | 0.71844 |        |
| <i>SOX4</i>     | NM_003107    | rs7280944  | 5.01E-03 | salmon | 0.89086 |        |
| <i>SPRED3</i>   | NM_001039616 | rs717091   | 2.07E-03 | salmon | 0.73945 |        |
| <i>SPTAN1</i>   | NM_003127    | rs4750717  | 6.40E-03 | salmon | 0.55663 |        |
| <i>SRGAP3</i>   | NM_001033117 | rs11715608 | 8.31E-04 | salmon | 0.85984 |        |
| <i>SRPK2</i>    | NM_182691    | rs3866247  | 4.42E-03 | salmon | 0.96340 |        |
| <i>ST7</i>      | NM_018412    | rs1999930  | 1.34E-04 | salmon | 0.88852 | autism |
| <i>STAT1</i>    | NM_139266    | rs3771300  | 1.83E-02 | salmon | 0.71207 |        |
| <i>STK32A</i>   | NM_145001    | rs2166819  | 1.32E-02 | salmon | 0.77908 |        |
| <i>STON1</i>    | NM_006873    | rs2255532  | 1.51E-03 | salmon | 0.82733 |        |
| <i>STOX2</i>    | NM_020225    | rs1978953  | 3.64E-02 | salmon | 0.69556 |        |
| <i>STS-1</i>    | NM_032873    | NA         | NA       | salmon | 0.96614 |        |
| <i>SVIL</i>     | NM_003174    | rs2394180  | 9.99E-04 | salmon | 0.84637 |        |
| <i>SVIL</i>     | NM_003174    | rs2394180  | 9.99E-04 | salmon | 0.93986 |        |
| <i>SYT17</i>    | NM_016524    | rs2503349  | 2.70E-04 | salmon | 0.83780 | autism |
| <i>SYTL2</i>    | NM_206929    | rs4907105  | 8.62E-03 | salmon | 0.84778 |        |
| <i>TACC1</i>    | NM_006283    | rs10512692 | 6.11E-03 | salmon | 0.84849 |        |
| <i>TBC1D14</i>  | NM_020773    | rs6054715  | 7.17E-04 | salmon | 0.66292 |        |

Supplementary Table 6

|                 |              |            |          |          |         |
|-----------------|--------------|------------|----------|----------|---------|
| <i>TBL1X</i>    | NM_005647    | NA         | NA       | salmon   | 0.84236 |
| <i>TFPI2</i>    | NM_006528    | rs17750365 | 1.01E-02 | salmon   | 0.76847 |
| <i>TGFB111</i>  | NM_015927    | rs207410   | 2.15E-02 | salmon   | 0.86932 |
| <i>TGIF</i>     | NM_003244    | rs10758256 | 6.29E-03 | salmon   | 0.49926 |
| <i>TGIF1</i>    | NM_170695    | rs10758256 | 6.29E-03 | salmon   | 0.74785 |
| <i>TH</i>       | NM_000360    | rs6972752  | 7.25E-03 | salmon   | 0.64362 |
| <i>THBS2</i>    | NM_003247    | rs551037   | 2.35E-03 | salmon   | 0.78008 |
| <i>THOC4</i>    | NM_005782    | rs1549118  | 2.16E-03 | salmon   | 0.63803 |
| <i>TKTL1</i>    | NM_012253    | NA         | NA       | salmon   | 0.91999 |
| <i>TLR4</i>     | NM_138557    | NA         | NA       | salmon   | 0.91387 |
| <i>TM4SF11</i>  | NM_015993    | NA         | NA       | salmon   | 0.86520 |
| <i>TMC7</i>     | NM_024847    | rs16979870 | 6.88E-03 | salmon   | 0.87167 |
| <i>TMEM16A</i>  | NM_018043    | NA         | NA       | salmon   | 0.93179 |
| <i>TMEM35</i>   | NM_021637    | NA         | NA       | salmon   | 0.79791 |
| <i>TNC</i>      | NM_002160    | rs10934301 | 1.61E-03 | salmon   | 0.55511 |
| <i>TNFRSF21</i> | NM_014452    | rs2426147  | 2.64E-03 | salmon   | 0.90915 |
| <i>TOB2</i>     | NM_016272    | rs1506174  | 1.34E-03 | salmon   | 0.32136 |
| <i>TOMM34</i>   | NM_006809    | rs9533529  | 1.84E-02 | salmon   | 0.78136 |
| <i>TOMM40</i>   | NM_006114    | rs12196609 | 2.43E-02 | salmon   | 0.78454 |
| <i>TPMT</i>     | NM_000367    | rs1495754  | 6.08E-03 | salmon   | 0.72482 |
| <i>TPST1</i>    | NM_003596    | rs10513964 | 5.92E-03 | salmon   | 0.86478 |
| <i>TRIB1</i>    | NM_025195    | rs2402851  | 1.94E-02 | salmon   | 0.96180 |
| <i>TRIM36</i>   | NM_001017397 | rs4613914  | 4.28E-04 | salmon   | 0.86121 |
| <i>TRIM36</i>   | NM_001017397 | rs4613914  | 4.28E-04 | salmon   | 0.92847 |
| <i>TSC22D3</i>  | NM_001015881 | NA         | NA       | salmon   | 0.61198 |
| <i>TSC22D3</i>  | NM_004089    | NA         | NA       | salmon   | 0.88458 |
| <i>TSC22D3</i>  | NM_004089    | NA         | NA       | salmon   | 0.96028 |
| <i>TTC9B</i>    | NM_152479    | rs6063100  | 1.39E-02 | salmon   | 0.86675 |
| <i>TUBB2C</i>   | NM_006088    | rs4520207  | 4.82E-03 | salmon   | 0.85794 |
| <i>UHRF1</i>    | NM_013282    | rs966062   | 9.36E-03 | salmon   | 0.53790 |
| <i>UNQ470</i>   | NM_198573    | NA         | NA       | salmon   | 0.79361 |
| <i>VAMP2</i>    | NM_014232    | rs2149111  | 1.36E-02 | salmon   | 0.81648 |
| <i>VEGF</i>     | NM_001025366 | rs17641380 | 1.36E-02 | salmon   | 0.71280 |
| <i>WDR1</i>     | NM_017491    | rs17439103 | 2.79E-04 | salmon   | 0.60314 |
| <i>WDR74</i>    | NM_018093    | rs7254212  | 1.74E-02 | salmon   | 0.82226 |
| <i>YPEL1</i>    | NM_013313    | rs8043036  | 2.42E-03 | salmon   | 0.88443 |
| <i>YPEL3</i>    | NM_031477    | rs2137856  | 1.50E-03 | salmon   | 0.90524 |
| <i>ZBTB5</i>    | NM_014872    | rs2835624  | 1.01E-02 | salmon   | 0.72806 |
| <i>ZNF291</i>   | NM_020843    | NA         | NA       | salmon   | 0.82769 |
| <i>ZNF397</i>   | NM_032347    | rs35043    | 3.34E-03 | salmon   | 0.80096 |
| <i>ZNF440L</i>  | NM_001012753 | NA         | NA       | salmon   | 0.62010 |
| <i>ZNF442</i>   | NM_030824    | rs220000   | 1.48E-02 | salmon   | 0.71809 |
| <i>ZNF540</i>   | NM_152606    | rs4812854  | 4.78E-03 | salmon   | 0.55366 |
| <i>ZNF627</i>   | NM_145295    | rs1016322  | 6.70E-03 | salmon   | 0.77215 |
| <i>ZNF655</i>   | NM_024061    | rs992708   | 1.48E-02 | salmon   | 0.21460 |
| <i>ZSCAN2</i>   | NM_181877    | rs9602198  | 2.10E-03 | salmon   | 0.75076 |
| <i>ZWINT</i>    | NM_001005413 | rs32617    | 1.30E-02 | salmon   | 0.85296 |
| <i>ABCC1</i>    | NM_019900    | rs17487930 | 1.01E-02 | seagreen | 0.02230 |
| <i>AMY2B</i>    | NM_020978    | rs2399931  | 4.14E-03 | seagreen | 0.00499 |

Supplementary Table 6

|                   |              |            |          |          |         |        |
|-------------------|--------------|------------|----------|----------|---------|--------|
| <i>AMZ2</i>       | NM_001033574 | rs1059440  | 3.07E-03 | seagreen | 0.00038 |        |
| <i>APOBEC3F</i>   | NM_001006666 | rs11759115 | 9.81E-03 | seagreen | 0.00115 |        |
| <i>BAI1</i>       | NM_001702    | rs1422711  | 2.22E-02 | seagreen | 0.36767 |        |
| <i>C10orf35</i>   | NM_145306    | rs1132845  | 9.57E-03 | seagreen | 0.77039 |        |
| <i>C14orf140</i>  | NM_024643    | NA         | NA       | seagreen | 0.37269 |        |
| <i>C1orf158</i>   | NM_152290    | rs917580   | 2.02E-02 | seagreen | 0.32146 |        |
| <i>C6orf190</i>   | NM_001010923 | NA         | NA       | seagreen | 0.00623 |        |
| <i>CDK6</i>       | NM_001259    | rs2035115  | 2.21E-03 | seagreen | 0.84633 |        |
| <i>CNN1</i>       | NM_001299    | rs7931254  | 1.71E-03 | seagreen | 0.42400 |        |
| <i>CYP4F8</i>     | NM_007253    | rs4416821  | 2.73E-03 | seagreen | 0.01739 |        |
| <i>DCTN1</i>      | NM_004082    | rs732765   | 5.08E-02 | seagreen | 0.02104 |        |
| <i>DICER1</i>     | NM_030621    | rs10992489 | 5.27E-03 | seagreen | 0.00035 |        |
| <i>FBN2</i>       | NM_001999    | rs6917351  | 1.89E-03 | seagreen | 0.82747 |        |
| <i>FLJ10916</i>   | NM_018271    | NA         | NA       | seagreen | 0.20050 |        |
| <i>FLJ20581</i>   | NM_017888    | NA         | NA       | seagreen | 0.01097 |        |
| <i>FLNB</i>       | NM_001457    | rs12598492 | 2.35E-03 | seagreen | 0.32058 |        |
| <i>GPC4</i>       | NM_001448    | NA         | NA       | seagreen | 0.98521 |        |
| <i>HAK</i>        | NM_052947    | NA         | NA       | seagreen | 1.00000 |        |
| <i>HSD17B6</i>    | NM_003725    | rs7174662  | 5.01E-04 | seagreen | 0.27573 |        |
| <i>HSF4</i>       | NM_001538    | rs2371382  | 9.10E-02 | seagreen | 0.01387 |        |
| <i>HSPE1</i>      | NM_002157    | rs12027362 | 1.12E-01 | seagreen | 0.03565 |        |
| <i>INHA</i>       | NM_002191    | rs7547751  | 4.46E-02 | seagreen | 0.23255 |        |
| <i>LMO1</i>       | NM_002315    | rs6640047  | 1.13E-03 | seagreen | 0.82261 |        |
| <i>LOC606724</i>  | NR_002454    | NA         | NA       | seagreen | 0.00660 |        |
| <i>MFAP5</i>      | NM_003480    | rs7257704  | 4.56E-03 | seagreen | 0.69590 |        |
| <i>NDUFV3</i>     | NM_001001503 | rs6463175  | 8.12E-03 | seagreen | 0.03218 |        |
| <i>NOS1AP</i>     | NM_014697    | rs6781001  | 3.08E-03 | seagreen | 0.19964 | autism |
| <i>NTSR2</i>      | NM_012344    | rs1296025  | 4.06E-03 | seagreen | 0.09813 |        |
| <i>NXT2</i>       | NM_018698    | NA         | NA       | seagreen | 0.00820 |        |
| <i>OPRL1</i>      | NM_000913    | rs1491963  | 5.12E-03 | seagreen | 0.33712 |        |
| <i>OR4P4</i>      | NM_001004124 | rs1909749  | 1.13E-02 | seagreen | 0.00028 |        |
| <i>OXGR1</i>      | NM_080818    | rs11188059 | 1.84E-02 | seagreen | 0.01759 |        |
| <i>PAFAH1B2</i>   | NM_002572    | rs1064583  | 1.48E-04 | seagreen | 0.07759 |        |
| <i>PCNXL2</i>     | NM_024938    | NA         | NA       | seagreen | 0.04576 |        |
| <i>PHF12</i>      | NM_020889    | rs1426891  | 1.57E-03 | seagreen | 0.04062 |        |
| <i>PPFIA2</i>     | NM_003625    | rs12574041 | 4.77E-04 | seagreen | 0.21532 |        |
| <i>PRG-3</i>      | NM_207299    | NA         | NA       | seagreen | 0.35402 |        |
| <i>PTPRN</i>      | NM_002846    | rs11892648 | 7.99E-03 | seagreen | 0.19927 |        |
| <i>RECQL5</i>     | NM_001003715 | rs3846030  | 2.55E-02 | seagreen | 0.07140 |        |
| <i>RP1-32F7.2</i> | NM_173698    | NA         | NA       | seagreen | 0.00853 |        |
| <i>RTN1</i>       | NM_206852    | rs11603417 | 9.13E-05 | seagreen | 0.81129 |        |
| <i>SLC13A3</i>    | NM_001011554 | rs1340649  | 4.04E-05 | seagreen | 0.00169 |        |
| <i>SLC7A5</i>     | NM_003486    | rs1124611  | 1.43E-02 | seagreen | 0.83376 |        |
| <i>SMOX</i>       | NM_175842    | rs12601993 | 3.04E-03 | seagreen | 0.02322 |        |
| <i>SORCS1</i>     | NM_001013031 | rs6643458  | 5.10E-05 | seagreen | 0.77451 |        |
| <i>SORCS1</i>     | NM_052918    | rs6643458  | 5.10E-05 | seagreen | 0.79837 |        |
| <i>SPAG1</i>      | NM_003114    | rs11765661 | 5.04E-03 | seagreen | 0.00846 |        |
| <i>SYNGR3</i>     | NM_004209    | rs901494   | 1.68E-02 | seagreen | 0.46483 |        |
| <i>THAP7</i>      | NM_030573    | rs9368091  | 2.99E-03 | seagreen | 0.00282 |        |

Supplementary Table 6

|                  |                    |            |          |          |         |          |
|------------------|--------------------|------------|----------|----------|---------|----------|
| <i>THBS1</i>     | NM_003246          | rs13302352 | 2.28E-04 | seagreen | 0.68910 |          |
| <i>TPPP</i>      | NM_007030          | rs7937869  | 1.25E-03 | seagreen | 0.17118 |          |
| <i>WDHD1</i>     | NM_001008396       | rs2126756  | 7.34E-03 | seagreen | 0.06769 |          |
| <i>WISP1</i>     | NM_080838          | rs1982342  | 8.98E-03 | seagreen | 0.02322 |          |
| <i>WNT9B</i>     | NM_003396          | rs441328   | 1.04E-02 | seagreen | 0.00073 |          |
| <i>ZDHHC22</i>   | NM_174976          | rs720863   | 1.90E-02 | seagreen | 0.02584 |          |
| <i>ZNF655</i>    | NM_001009958       | rs992708   | 1.48E-02 | seagreen | 0.00378 |          |
|                  | 8-Sep NM_001011553 | NA         | NA       | skyblue  | 0.05990 |          |
| <i>ABHD5</i>     | NM_016006          | rs766117   | 8.23E-03 | skyblue  | 0.26517 |          |
| <i>ACVR2B</i>    | NM_001106          | rs9838614  | 4.95E-03 | skyblue  | 0.01247 |          |
| <i>ADCY8</i>     | NM_001115          | rs1478091  | 1.06E-03 | skyblue  | 0.26477 |          |
| <i>AKAP6</i>     | NM_004274          | rs2124748  | 3.20E-05 | skyblue  | 0.25756 |          |
| <i>ANKRD40</i>   | NM_052855          | rs2839040  | 1.91E-02 | skyblue  | 0.20513 |          |
| <i>AP1G2</i>     | NM_003917          | rs7873393  | 3.21E-02 | skyblue  | 0.21649 |          |
| <i>AQP3</i>      | NM_004925          | rs12154760 | 1.49E-02 | skyblue  | 0.07939 |          |
| <i>ARF1</i>      | NM_001024226       | rs3820624  | 8.24E-02 | skyblue  | 0.14592 |          |
| <i>ARHGAP28</i>  | NM_001010000       | rs10492951 | 2.73E-03 | skyblue  | 0.11585 |          |
| <i>ATE1</i>      | NM_007041          | rs720203   | 9.18E-03 | skyblue  | 0.32088 |          |
| <i>B3GALT3</i>   | NM_033169          | rs1784597  | 3.04E-02 | skyblue  | 0.26280 |          |
| <i>BCR</i>       | NM_004327          | rs6452027  | 7.50E-04 | skyblue  | 0.02520 |          |
| <i>BHLHB5</i>    | NM_152414          | NA         | NA       | skyblue  | 0.26635 |          |
| <i>BLOC1S2</i>   | NM_001001342       | rs2749065  | 6.47E-03 | skyblue  | 0.23401 |          |
| <i>BRF1</i>      | NM_001519          | rs3822292  | 1.19E-02 | skyblue  | 0.24689 |          |
| <i>C14orf118</i> | NM_017926          | rs2083868  | 8.13E-03 | skyblue  | 0.39946 |          |
| <i>C14orf150</i> | NM_001008726       | NA         | NA       | skyblue  | 0.02577 |          |
| <i>C20orf46</i>  | NM_018354          | rs6078117  | 5.46E-03 | skyblue  | 0.38391 |          |
| <i>C21orf55</i>  | NM_001040192       | NA         | NA       | skyblue  | 0.09277 |          |
| <i>C21orf58</i>  | NM_058180          | rs929693   | 7.99E-03 | skyblue  | 0.07326 |          |
| <i>C3orf28</i>   | NM_014367          | NA         | NA       | skyblue  | 0.29588 |          |
| <i>C6orf157</i>  | NM_198920          | NA         | NA       | skyblue  | 0.03076 |          |
| <i>C9orf50</i>   | NM_199350          | rs3780695  | 1.95E-02 | skyblue  | 0.03081 |          |
| <i>C9orf95</i>   | NM_017881          | rs17105732 | 1.86E-03 | skyblue  | 0.18398 |          |
| <i>CACHD1</i>    | NM_020925          | rs17767008 | 2.02E-03 | skyblue  | 0.87904 |          |
| <i>CACNB4</i>    | NM_001005747       | rs2870518  | 1.16E-02 | skyblue  | 0.03272 | epilepsy |
| <i>CADPS</i>     | NM_003716          | rs7084300  | 1.44E-04 | skyblue  | 0.14643 |          |
| <i>CAPN11</i>    | NM_007058          | rs7326252  | 1.49E-04 | skyblue  | 0.07095 |          |
| <i>CAPN3</i>     | NM_173087          | rs6072705  | 3.47E-03 | skyblue  | 0.25808 |          |
| <i>CAPN9</i>     | NM_016452          | rs12038826 | 7.60E-03 | skyblue  | 0.04582 |          |
| <i>CAPS</i>      | NM_004058          | rs32566    | 8.67E-03 | skyblue  | 0.03947 |          |
| <i>CBFA2T2</i>   | NM_001032999       | rs1902334  | 5.48E-04 | skyblue  | 0.01482 |          |
| <i>CCDC57</i>    | NM_198082          | rs4853333  | 9.60E-03 | skyblue  | 0.37558 |          |
| <i>CDC14A</i>    | NM_033313          | rs4851346  | 2.71E-03 | skyblue  | 0.15644 |          |
| <i>CDCA7</i>     | NM_031942          | rs4233164  | 1.74E-02 | skyblue  | 0.63719 |          |
| <i>CDH17</i>     | NM_004063          | rs6834248  | 4.90E-03 | skyblue  | 0.00697 |          |
| <i>CDH26</i>     | NM_021810          | rs9856128  | 2.04E-02 | skyblue  | 0.06585 |          |
| <i>CEL</i>       | NM_001807          | rs2073821  | 7.06E-03 | skyblue  | 0.19338 |          |
| <i>CLK1</i>      | NM_001024646       | NA         | NA       | skyblue  | 0.62582 |          |
| <i>COG3</i>      | NM_031431          | rs10421474 | 3.38E-03 | skyblue  | 0.16091 |          |
| <i>COL1A1</i>    | NM_000088          | rs7699135  | 5.17E-03 | skyblue  | 0.46640 |          |



Supplementary Table 6

|                 |              |            |          |         |         |          |
|-----------------|--------------|------------|----------|---------|---------|----------|
| <i>COL6A2</i>   | NM_001849    | rs131100   | 1.02E-02 | skyblue | 0.18970 |          |
| <i>CORT</i>     | NM_001302    | rs10946418 | 2.38E-03 | skyblue | 0.35747 |          |
| <i>CPA1</i>     | NM_001868    | rs7793239  | 2.51E-02 | skyblue | 0.00313 |          |
| <i>CPB1</i>     | NM_001871    | rs1546632  | 4.81E-04 | skyblue | 0.04056 |          |
| <i>CRELD1</i>   | NM_001031717 | rs1859586  | 2.45E-03 | skyblue | 0.03429 |          |
| <i>CSMD3</i>    | NM_052900    | rs11259844 | 3.54E-04 | skyblue | 0.24636 |          |
| <i>CXXC6</i>    | NM_030625    | NA         | NA       | skyblue | 0.83912 |          |
| <i>DAPK2</i>    | NM_014326    | rs1286831  | 6.00E-04 | skyblue | 0.08446 |          |
| <i>DHRS8</i>    | NM_016245    | NA         | NA       | skyblue | 0.52774 |          |
| <i>DIDO1</i>    | NM_080796    | rs10510858 | 6.33E-03 | skyblue | 0.10632 |          |
| <i>DNAJB4</i>   | NM_007034    | rs1207868  | 2.88E-02 | skyblue | 0.04560 |          |
| <i>DSG1</i>     | NM_001942    | rs9554090  | 6.33E-03 | skyblue | 0.04349 |          |
| <i>DUSP26</i>   | NM_024025    | rs11009311 | 8.60E-03 | skyblue | 0.43060 |          |
| <i>DYNLT3</i>   | NM_006520    | NA         | NA       | skyblue | 0.12074 |          |
| <i>EAF2</i>     | NM_018456    | rs1078305  | 8.18E-03 | skyblue | 0.13685 |          |
| <i>ECHDC1</i>   | NM_018479    | rs10101666 | 2.07E-03 | skyblue | 0.04171 |          |
| <i>EFNA4</i>    | NM_182690    | rs11156577 | 1.11E-04 | skyblue | 0.27332 |          |
| <i>ELMO2</i>    | NM_133171    | rs11082688 | 1.18E-02 | skyblue | 0.25495 |          |
| <i>ENAH</i>     | NM_018212    | rs2203733  | 2.03E-02 | skyblue | 0.72381 |          |
| <i>EPB41</i>    | NM_203343    | rs13098112 | 2.76E-03 | skyblue | 0.06772 |          |
| <i>EPB41L4B</i> | NM_018424    | rs10505135 | 3.90E-03 | skyblue | 0.19608 |          |
| <i>FAIM</i>     | NM_001033031 | rs10106218 | 1.82E-03 | skyblue | 0.05623 |          |
| <i>FAM49B</i>   | NM_016623    | rs2480452  | 2.05E-03 | skyblue | 0.07145 |          |
| <i>FBXO44</i>   | NM_001014765 | rs2561624  | 2.30E-03 | skyblue | 0.01829 |          |
| <i>FBXO44</i>   | NM_183412    | rs2561624  | 2.30E-03 | skyblue | 0.37070 |          |
| <i>FGF12</i>    | NM_004113    | rs4687332  | 5.50E-03 | skyblue | 0.33850 |          |
| <i>FLJ22531</i> | NM_024650    | NA         | NA       | skyblue | 0.75234 |          |
| <i>FLJ23588</i> | NM_198856    | NA         | NA       | skyblue | 0.00699 |          |
| <i>FLJ25006</i> | NM_144610    | NA         | NA       | skyblue | 0.47534 |          |
| <i>FLJ32679</i> | NM_001012452 | NA         | NA       | skyblue | 0.10248 |          |
| <i>FLJ42957</i> | NM_207436    | NA         | NA       | skyblue | 0.09137 |          |
| <i>FLJ90834</i> | NM_173578    | NA         | NA       | skyblue | 0.01163 |          |
| <i>FPGT</i>     | NM_003838    | rs920901   | 4.85E-02 | skyblue | 0.15943 |          |
| <i>FRYL</i>     | NM_015030    | rs1460200  | 1.12E-03 | skyblue | 0.20533 |          |
| <i>FUT5</i>     | NM_002034    | rs2222831  | 5.19E-03 | skyblue | 0.05521 |          |
| <i>GABRG2</i>   | NM_000816    | rs1722636  | 1.20E-02 | skyblue | 0.17979 | epilepsy |
| <i>GADD45B</i>  | NM_015675    | rs17793630 | 1.95E-02 | skyblue | 0.08566 |          |
| <i>GALNT2</i>   | NM_004481    | rs940339   | 3.52E-02 | skyblue | 0.08265 |          |
| <i>GCGR</i>     | NM_000160    | NA         | NA       | skyblue | 0.08951 |          |
| <i>GDNF</i>     | NM_000514    | rs744713   | 6.45E-03 | skyblue | 0.02054 |          |
| <i>GMPPB</i>    | NM_021971    | rs9296619  | 1.78E-02 | skyblue | 0.61166 |          |
| <i>GMPPR2</i>   | NM_016576    | rs2828169  | 1.35E-03 | skyblue | 0.45972 |          |
| <i>GPR124</i>   | NM_032777    | rs6733157  | 1.89E-02 | skyblue | 0.00862 |          |
| <i>GPT</i>      | NM_005309    | rs1527237  | 1.29E-01 | skyblue | 0.05714 |          |
| <i>HBM</i>      | NM_001003938 | rs7502120  | 6.14E-03 | skyblue | 0.04102 |          |
| <i>HCG3</i>     | NM_001001394 | NA         | NA       | skyblue | 0.02255 |          |
| <i>HERC2P2</i>  | XR_000517    | NA         | NA       | skyblue | 0.05304 |          |
| <i>HIP1R</i>    | NM_003959    | rs11199183 | 3.25E-02 | skyblue | 0.07081 |          |
| <i>HLA-DRB6</i> | NR_001298    | rs2858814  | 5.43E-02 | skyblue | 0.17807 |          |

Supplementary Table 6

|                  |              |            |          |         |         |
|------------------|--------------|------------|----------|---------|---------|
| <i>ID12</i>      | NM_033261    | rs9951158  | 1.49E-02 | skyblue | 0.01285 |
| <i>IL15</i>      | NM_172174    | rs4662472  | 2.42E-02 | skyblue | 0.41505 |
| <i>IRX1</i>      | NM_024337    | rs2880892  | 1.71E-04 | skyblue | 0.10693 |
| <i>IRX2</i>      | NM_033267    | rs956764   | 2.69E-03 | skyblue | 0.02182 |
| <i>ITGA1</i>     | NM_181501    | rs2456207  | 4.36E-03 | skyblue | 0.02917 |
| <i>KCNAB3</i>    | NM_004732    | rs4787079  | 4.27E-03 | skyblue | 0.09065 |
| <i>KCNK10</i>    | NM_138317    | rs645063   | 4.75E-03 | skyblue | 0.25997 |
| <i>KIAA0802</i>  | NM_015210    | rs7257704  | 4.56E-03 | skyblue | 0.09051 |
| <i>KIAA0961</i>  | NM_014898    | NA         | NA       | skyblue | 0.04947 |
| <i>KIF13A</i>    | NM_022113    | rs7119188  | 5.06E-04 | skyblue | 0.07885 |
| <i>KIF3A</i>     | NM_007054    | rs4837492  | 1.08E-03 | skyblue | 0.28328 |
| <i>KITLG</i>     | NM_000899    | rs9300794  | 6.56E-03 | skyblue | 0.53465 |
| <i>L3MBTL</i>    | NM_015478    | NA         | NA       | skyblue | 0.48279 |
| <i>LCE1F</i>     | NM_178354    | rs2536085  | 9.59E-03 | skyblue | 0.01902 |
| <i>LCOR</i>      | NM_032440    | rs10892901 | 3.08E-03 | skyblue | 0.52461 |
| <i>LGI1</i>      | NM_005097    | rs11626041 | 5.00E-03 | skyblue | 0.17581 |
| <i>LILRA2</i>    | NM_006866    | rs272407   | 1.37E-02 | skyblue | 0.00822 |
| <i>LMNB1</i>     | NM_005573    | rs1946053  | 3.38E-02 | skyblue | 0.49466 |
| <i>LOC113444</i> | NM_138428    | NA         | NA       | skyblue | 0.10205 |
| <i>LOC388503</i> | NM_001013640 | NA         | NA       | skyblue | 0.36880 |
| <i>LOC400707</i> | NM_001013673 | NA         | NA       | skyblue | 0.02342 |
| <i>LOC401286</i> | NM_001023565 | NA         | NA       | skyblue | 0.24963 |
| <i>LOC440350</i> | NM_001018122 | NA         | NA       | skyblue | 0.24679 |
| <i>LOC440926</i> | NR_002315    | rs7607927  | 1.75E-03 | skyblue | 0.33817 |
| <i>LOC643196</i> | XM_931397    | NA         | NA       | skyblue | 0.18584 |
| <i>LOC644890</i> | XM_927975    | NA         | NA       | skyblue | 0.04444 |
| <i>LOC654084</i> | XM_938984    | NA         | NA       | skyblue | 0.82360 |
| <i>LOC727936</i> | NM_001080393 | NA         | NA       | skyblue | 0.07679 |
| <i>LSS</i>       | NM_001001438 | rs2839159  | 6.83E-04 | skyblue | 0.10273 |
| <i>LST1</i>      | NM_205837    | rs942343   | 5.09E-02 | skyblue | 0.05458 |
| <i>LTB4R2</i>    | NM_019839    | rs10966105 | 7.85E-03 | skyblue | 0.05512 |
| <i>MAFG</i>      | NM_002359    | rs2302944  | 6.24E-03 | skyblue | 0.24263 |
| <i>MFAP2</i>     | NM_017459    | rs2188015  | 2.23E-03 | skyblue | 0.00819 |
| <i>MGC14141</i>  | NM_032928    | NA         | NA       | skyblue | 0.61005 |
| <i>MGC23280</i>  | NM_144683    | NA         | NA       | skyblue | 0.26640 |
| <i>MGC23985</i>  | NM_206966    | NA         | NA       | skyblue | 0.01398 |
| <i>MGC2408</i>   | NM_032331    | rs17139    | 9.80E-03 | skyblue | 0.15013 |
| <i>MGC33486</i>  | XM_938846    | NA         | NA       | skyblue | 0.02993 |
| <i>MGC33887</i>  | NM_145036    | rs6011530  | 1.02E-03 | skyblue | 0.41525 |
| <i>MPP3</i>      | NM_001932    | rs10888650 | 7.90E-04 | skyblue | 0.34459 |
| <i>MRPL1</i>     | NM_020236    | rs1344085  | 1.39E-03 | skyblue | 0.19782 |
| <i>MTMR3</i>     | NM_153050    | rs11840398 | 1.32E-03 | skyblue | 0.90643 |
| <i>MXRA8</i>     | NM_032348    | rs2734791  | 4.55E-02 | skyblue | 0.86061 |
| <i>NET1</i>      | NM_005863    | rs1386067  | 5.06E-03 | skyblue | 0.22548 |
| <i>NFATC3</i>    | NM_173163    | rs11077554 | 5.15E-03 | skyblue | 0.09754 |
| <i>NIPBL</i>     | NM_015384    | rs13288123 | 1.27E-03 | skyblue | 0.09184 |
| <i>NKIRAS2</i>   | NM_001001349 | rs2835624  | 1.01E-02 | skyblue | 0.02445 |
| <i>NOL6</i>      | NM_022917    | rs6462481  | 2.99E-03 | skyblue | 0.03578 |
| <i>NRXN3</i>     | NM_004796    | rs10793345 | 1.70E-04 | skyblue | 0.55777 |

Supplementary Table 6

|                   |              |            |          |         |         |          |
|-------------------|--------------|------------|----------|---------|---------|----------|
| <i>NUDCD1</i>     | NM_032869    | rs7076021  | 1.68E-03 | skyblue | 0.05420 |          |
| <i>ODZ3</i>       | NM_001080477 | rs4651255  | 1.26E-03 | skyblue | 0.28323 |          |
| <i>OPHN1</i>      | NM_002547    | NA         | NA       | skyblue | 0.79492 | autism   |
| <i>OVCA2</i>      | NM_080822    | rs1331297  | 4.26E-03 | skyblue | 0.07273 |          |
| <i>PAP2</i>       | NM_001010861 | NA         | NA       | skyblue | 0.34573 |          |
| <i>PAP2D</i>      | NM_001037317 | NA         | NA       | skyblue | 0.20209 |          |
| <i>PBOV1</i>      | NM_021635    | rs16840318 | 3.75E-02 | skyblue | 0.11026 |          |
| <i>PCDHA6</i>     | NM_031849    | rs6577995  | 5.22E-03 | skyblue | 0.07333 |          |
| <i>PCDHB12</i>    | NM_018932    | rs1382020  | 1.81E-01 | skyblue | 0.83470 |          |
| <i>PCDHB13</i>    | NM_018933    | rs5907996  | 5.94E-02 | skyblue | 0.85591 |          |
| <i>PCDHB18</i>    | NR_001281    | rs2471083  | 4.36E-02 | skyblue | 1.00000 |          |
| <i>PCDHGA10</i>   | NM_032090    | rs988446   | 5.78E-02 | skyblue | 0.07556 |          |
| <i>PCDHGB4</i>    | NM_032098    | rs9698057  | 6.58E-03 | skyblue | 0.10638 |          |
| <i>PI16</i>       | NM_153370    | rs7146299  | 1.13E-02 | skyblue | 0.05884 |          |
| <i>PMP22</i>      | NM_000304    | rs12774668 | 4.83E-03 | skyblue | 0.03771 |          |
| <i>POLR2J2</i>    | NM_145325    | NA         | NA       | skyblue | 0.16300 |          |
| <i>POLR3H</i>     | NM_001018051 | NA         | NA       | skyblue | 0.04747 |          |
| <i>PPM1B</i>      | NM_001033557 | rs1984192  | 5.50E-04 | skyblue | 0.35811 |          |
| <i>PPM1L</i>      | NM_139245    | rs11962721 | 6.53E-03 | skyblue | 0.08616 |          |
| <i>PRLR</i>       | NM_000949    | rs2701516  | 1.79E-04 | skyblue | 0.00761 |          |
| <i>RALGPS2</i>    | NM_018037    | NA         | NA       | skyblue | 0.02808 |          |
| <i>RCCD1</i>      | NM_033544    | rs2622629  | 3.07E-02 | skyblue | 0.00947 |          |
| <i>RCE1</i>       | NM_001032279 | rs2180448  | 9.40E-03 | skyblue | 0.21646 |          |
| <i>REP15</i>      | NM_001029874 | rs3806624  | 2.98E-02 | skyblue | 0.04269 |          |
| <i>RG9MTD1</i>    | NM_017819    | rs11190790 | 3.29E-02 | skyblue | 0.04202 |          |
| <i>RHBDF2</i>     | NM_024599    | rs2161675  | 9.49E-03 | skyblue | 0.02204 |          |
| <i>RIF1</i>       | NM_018151    | rs6464268  | 1.27E-02 | skyblue | 0.10567 |          |
| <i>RRBP1</i>      | NM_001042576 | rs4504735  | 1.34E-03 | skyblue | 0.17836 |          |
| <i>RSC1A1</i>     | NM_006511    | rs1558139  | 4.30E-02 | skyblue | 0.23472 |          |
| <i>RSU1</i>       | NM_152724    | rs4321183  | 9.42E-04 | skyblue | 0.09868 |          |
| <i>SAA2</i>       | NM_030754    | rs4832551  | 3.05E-02 | skyblue | 0.06162 |          |
| <i>SCGB1D2</i>    | NM_006551    | rs12450534 | 8.80E-03 | skyblue | 0.01319 |          |
| <i>SCN3A</i>      | NM_006922    | rs3820390  | 1.03E-02 | skyblue | 0.05161 |          |
| <i>SDC3</i>       | XM_944729    | NA         | NA       | skyblue | 0.01169 |          |
| <i>SEC24B</i>     | NM_006323    | rs1019753  | 7.01E-03 | skyblue | 0.25544 |          |
| <i>SEMA4A</i>     | NM_022367    | rs1294092  | 2.59E-02 | skyblue | 0.04976 |          |
| <i>SERINC3</i>    | NM_198941    | rs225436   | 3.99E-03 | skyblue | 0.01015 |          |
| <i>SFTPD</i>      | NM_003019    | rs224912   | 1.12E-03 | skyblue | 0.02359 |          |
| <i>SH2D3C</i>     | NM_005489    | rs11018376 | 4.55E-03 | skyblue | 0.04060 |          |
| <i>SLC12A5</i>    | NM_020708    | rs2297198  | 4.00E-03 | skyblue | 0.44642 | epilepsy |
| <i>SLC22A18AS</i> | NM_007105    | rs11251532 | 3.96E-03 | skyblue | 0.10006 |          |
| <i>SLC25A45</i>   | NM_001077241 | rs2073801  | 2.58E-03 | skyblue | 0.05424 |          |
| <i>SLC26A7</i>    | NM_134266    | rs9294508  | 2.68E-03 | skyblue | 0.02488 |          |
| <i>SLC35F3</i>    | XM_939358    | NA         | NA       | skyblue | 0.03185 |          |
| <i>SLC36A3</i>    | NM_181774    | rs3810715  | 2.04E-02 | skyblue | 0.05075 |          |
| <i>SMAD1</i>      | NM_001003688 | rs7707452  | 1.37E-02 | skyblue | 0.18746 |          |
| <i>SMC1L1</i>     | NM_006306    | NA         | NA       | skyblue | 0.56802 |          |
| <i>SNRP70</i>     | NM_001009820 | NA         | NA       | skyblue | 0.35249 |          |
| <i>SNX12</i>      | NM_013346    | NA         | NA       | skyblue | 0.03873 |          |

Supplementary Table 6

|                  |              |            |          |         |         |
|------------------|--------------|------------|----------|---------|---------|
| <i>SNX15</i>     | NM_013306    | rs10277011 | 2.06E-02 | skyblue | 0.22729 |
| <i>SOCS5</i>     | NM_014011    | rs6827925  | 4.00E-03 | skyblue | 0.32974 |
| <i>SPRN</i>      | NM_001012508 | rs2024704  | 1.33E-03 | skyblue | 0.02687 |
| <i>SPTBN4</i>    | NM_025213    | rs6429566  | 4.80E-03 | skyblue | 0.23511 |
| <i>SREBF1</i>    | NM_001005291 | rs11683808 | 5.07E-03 | skyblue | 0.01491 |
| <i>SS18</i>      | NM_005637    | rs6452027  | 7.50E-04 | skyblue | 0.10155 |
| <i>STRN</i>      | NM_003162    | rs13288123 | 1.27E-03 | skyblue | 0.07991 |
| <i>SULF2</i>     | NM_018837    | rs2428684  | 4.57E-03 | skyblue | 0.70869 |
| <i>TAF5L</i>     | NM_014409    | rs6701445  | 1.03E-02 | skyblue | 0.06093 |
| <i>TDRD1</i>     | NM_198795    | rs763229   | 6.19E-04 | skyblue | 0.01959 |
| <i>TGFBR2</i>    | NM_001024847 | rs586594   | 1.15E-03 | skyblue | 0.02763 |
| <i>TMEM53</i>    | NM_024587    | rs718798   | 1.35E-03 | skyblue | 0.38763 |
| <i>TMSB4Y</i>    | NM_004202    | NA         | NA       | skyblue | 0.00359 |
| <i>TNFRSF6B</i>  | NM_032945    | rs1533356  | 6.28E-03 | skyblue | 0.51027 |
| <i>TOM1L2</i>    | NM_144678    | NA         | NA       | skyblue | 0.28240 |
| <i>TOP1P2</i>    | NR_001283    | rs4452416  | 6.48E-03 | skyblue | 0.03835 |
| <i>TPD52</i>     | NM_001025253 | rs6473199  | 6.57E-03 | skyblue | 0.00483 |
| <i>TPTE2</i>     | NM_130785    | rs16979870 | 6.88E-03 | skyblue | 0.01243 |
| <i>TRAK1</i>     | NM_001042646 | rs729559   | 3.22E-03 | skyblue | 0.45455 |
| <i>TRHR</i>      | NM_003301    | rs3098728  | 1.00E-03 | skyblue | 0.01362 |
| <i>TRIM56</i>    | NM_030961    | rs1567663  | 1.52E-03 | skyblue | 0.12064 |
| <i>TRIM6</i>     | NM_001003818 | rs732007   | 1.07E-03 | skyblue | 0.01042 |
| <i>UNQ2541</i>   | NM_203347    | NA         | NA       | skyblue | 0.07830 |
| <i>USP20</i>     | NM_006676    | rs12547913 | 6.95E-03 | skyblue | 0.00899 |
| <i>VIP</i>       | NM_003381    | rs3757070  | 4.09E-03 | skyblue | 0.08354 |
| <i>WDSOF1</i>    | NM_015420    | NA         | NA       | skyblue | 0.01429 |
| <i>XRN1</i>      | NM_019001    | rs1422711  | 2.22E-02 | skyblue | 0.90981 |
| <i>ZNF33A</i>    | NM_006974    | rs8113143  | 6.69E-03 | skyblue | 0.98787 |
| <i>ZNF544</i>    | NM_014480    | rs2127047  | 1.90E-02 | skyblue | 0.01317 |
| <i>ZNF561</i>    | NM_152289    | rs7072434  | 6.86E-03 | skyblue | 0.15207 |
| <i>ZNF580</i>    | NM_207115    | rs8051621  | 8.52E-03 | skyblue | 0.02712 |
| <i>ZNF596</i>    | NM_001042416 | rs727056   | 2.01E-03 | skyblue | 0.09486 |
| <i>ZNF805</i>    | NM_001023563 | rs6858066  | 7.16E-03 | skyblue | 0.52821 |
| <i>ZNF83</i>     | NM_018300    | rs10401904 | 6.68E-03 | skyblue | 0.70830 |
| <i>ACSS1</i>     | NM_032501    | rs10946735 | 4.77E-03 | tan     | 0.02613 |
| <i>ACTN2</i>     | NM_001103    | rs10925206 | 5.69E-03 | tan     | 0.34095 |
| <i>C10orf79</i>  | NM_025145    | rs6726474  | 3.39E-03 | tan     | 0.03666 |
| <i>C10orf87</i>  | NM_144587    | NA         | NA       | tan     | 0.02696 |
| <i>C14orf103</i> | NM_018036    | NA         | NA       | tan     | 0.04379 |
| <i>C8orf42</i>   | NM_175075    | rs4742002  | 5.89E-05 | tan     | 0.80976 |
| <i>C8orf45</i>   | NM_173518    | rs10146772 | 1.07E-02 | tan     | 0.53917 |
| <i>CAMKV</i>     | NM_024046    | rs10940390 | 2.67E-02 | tan     | 0.76019 |
| <i>CDK5RAP3</i>  | NM_176095    | NA         | NA       | tan     | 0.34069 |
| <i>CLTA</i>      | NM_007096    | rs4833144  | 1.24E-04 | tan     | 0.04113 |
| <i>CRABP1</i>    | NM_004378    | rs2914143  | 8.05E-03 | tan     | 0.00500 |
| <i>CSAD</i>      | NM_015989    | rs627860   | 1.22E-03 | tan     | 0.75026 |
| <i>CSTF1</i>     | NM_001033522 | rs17117895 | 8.40E-04 | tan     | 0.06732 |
| <i>DENND1B</i>   | NM_144977    | rs2488389  | 3.20E-03 | tan     | 0.01784 |
| <i>DKK3</i>      | NM_013253    | rs279141   | 2.87E-03 | tan     | 0.79896 |

Supplementary Table 6

|                  |                 |            |          |           |         |
|------------------|-----------------|------------|----------|-----------|---------|
| <i>DMD</i>       | NM_004006       | NA         | NA       | tan       | 0.04801 |
| <i>EGFR</i>      | NM_201284       | rs1461796  | 1.11E-03 | tan       | 0.01020 |
| <i>FAM81A</i>    | NM_152450       | rs2964206  | 2.22E-03 | tan       | 0.05683 |
| <i>FLJ45803</i>  | NM_207429       | NA         | NA       | tan       | 0.06684 |
| <i>FNDC1</i>     | NM_032532       | rs2932988  | 4.58E-03 | tan       | 0.05811 |
| <i>GAD1</i>      | NM_000817       | rs16858988 | 6.89E-02 | tan       | 0.84719 |
| <i>GJB3</i>      | NM_001005752    | rs6457797  | 1.34E-02 | tan       | 0.01514 |
| <i>GNAO1</i>     | NM_138736       | rs930185   | 4.24E-03 | tan       | 0.00641 |
| <i>GOLGA8A</i>   | NM_181077       | rs533873   | 1.94E-03 | tan       | 0.48111 |
| <i>GSDML</i>     | NM_018530       | NA         | NA       | tan       | 0.70629 |
| <i>IL15RA</i>    | NM_172200       | rs7007868  | 5.01E-03 | tan       | 0.00083 |
| <i>KCNH3</i>     | NM_012284       | rs4774557  | 1.66E-03 | tan       | 0.30153 |
| <i>KLK3</i>      | NM_001030050    | rs10888939 | 3.92E-03 | tan       | 0.00221 |
| <i>LHX5</i>      | NM_022363       | rs4839202  | 7.48E-04 | tan       | 0.03776 |
| <i>LOC653319</i> | NM_001040715    | NA         | NA       | tan       | 0.71787 |
| <i>LOC653745</i> | XM_929376       | NA         | NA       | tan       | 0.03771 |
| <i>LYPD5</i>     | NM_001031749    | rs4609919  | 1.79E-02 | tan       | 0.00083 |
| <i>MAGI2</i>     | NM_012301       | rs10793345 | 1.70E-04 | tan       | 0.00120 |
| <i>MEG3</i>      | XR_000943       | NA         | NA       | tan       | 0.56132 |
| <i>MITF</i>      | NM_198159       | rs7905556  | 1.96E-02 | tan       | 0.04232 |
| <i>MMP19</i>     | NM_001032360    | NA         | NA       | tan       | 0.06208 |
| <i>NAP1L1</i>    | NM_139207       | rs1374879  | 1.14E-02 | tan       | 0.05554 |
| <i>NEDD9</i>     | NM_182966       | rs2242451  | 3.01E-03 | tan       | 0.00159 |
| <i>NFATC2IP</i>  | NM_032815       | rs2057954  | 1.04E-02 | tan       | 0.00054 |
| <i>NFKBIZ</i>    | NM_001005474    | rs10076146 | 2.85E-02 | tan       | 0.95790 |
| <i>OSBPL1A</i>   | NM_018030       | rs12590446 | 6.77E-04 | tan       | 0.00050 |
| <i>PC</i>        | NM_000920       | rs10492203 | 5.23E-04 | tan       | 0.02399 |
| <i>PH-4</i>      | NM_017732       | NA         | NA       | tan       | 0.41831 |
| <i>PICALM</i>    | NM_007166       | rs7000150  | 5.01E-03 | tan       | 0.03637 |
| <i>PPARG</i>     | NM_138712       | rs11787776 | 4.51E-03 | tan       | 0.66480 |
| <i>PSMD4</i>     | NM_153822       | NA         | NA       | tan       | 0.03278 |
| <i>PSPH</i>      | NM_004577       | rs10888939 | 3.92E-03 | tan       | 0.45221 |
| <i>RASGRF1</i>   | NM_153815       | rs11643648 | 6.88E-04 | tan       | 0.00073 |
| <i>RCN3</i>      | NM_020650       | rs8003961  | 1.82E-03 | tan       | 0.00327 |
| <i>SEC14L4</i>   | NM_174977       | rs13098112 | 2.76E-03 | tan       | 0.00772 |
| <i>SF1</i>       | NM_201997       | rs8039508  | 4.09E-02 | tan       | 0.44750 |
| <i>SLC25A19</i>  | NM_021734       | rs6452722  | 2.57E-02 | tan       | 0.14339 |
| <i>SLN</i>       | NM_003063       | rs1028220  | 3.13E-02 | tan       | 0.37238 |
| <i>SORD</i>      | NM_003104       | rs1027413  | 2.09E-02 | tan       | 0.04088 |
| <i>SSTR2</i>     | NM_001050       | rs11581095 | 6.06E-03 | tan       | 0.33865 |
| <i>TAF5L</i>     | NM_001025247    | rs2273574  | 1.01E-01 | tan       | 0.00488 |
| <i>TBC1D3B</i>   | NM_001001417    | rs7034481  | 2.50E-02 | tan       | 0.56719 |
| <i>TMEM17</i>    | NM_198276       | rs12422918 | 5.14E-03 | tan       | 0.79254 |
| <i>USP49</i>     | NM_018561       | rs4632397  | 1.20E-03 | tan       | 0.30823 |
| <i>WHSC1L1</i>   | NM_023034       | rs8113143  | 6.69E-03 | tan       | 0.02256 |
| <i>WSB1</i>      | NM_134265       | rs337475   | 3.36E-04 | tan       | 1.00000 |
| <i>XRN1</i>      | NM_001042604    | rs1422711  | 2.22E-02 | tan       | 0.01764 |
| <i>ZNF96</i>     | NM_014724       | NA         | NA       | tan       | 0.11647 |
|                  | 6-Sep NM_002688 | NA         | NA       | turquoise | 0.15315 |

Supplementary Table 6

|                  |              |            |          |           |         |          |
|------------------|--------------|------------|----------|-----------|---------|----------|
| <i>A4GALT</i>    | NM_017436    | rs10742587 | 2.09E-03 | turquoise | 0.13917 |          |
| <i>ACADS</i>     | NM_000017    | rs10892559 | 1.97E-02 | turquoise | 0.36021 |          |
| <i>ACTG2</i>     | NM_001615    | rs10081518 | 2.16E-03 | turquoise | 0.81377 |          |
| <i>ADAMTS1</i>   | NM_006988    | rs9554090  | 6.33E-03 | turquoise | 0.20727 |          |
| <i>ADORA1</i>    | NM_000674    | rs12135643 | 2.43E-02 | turquoise | 0.01796 |          |
| <i>ADORA2A</i>   | NM_000675    | rs2531860  | 1.38E-03 | turquoise | 0.11663 | autism   |
| <i>ADRA1B</i>    | NM_000679    | rs7624303  | 9.13E-03 | turquoise | 0.03233 |          |
| <i>APC</i>       | NM_000038    | rs475620   | 2.34E-03 | turquoise | 0.03440 | autism   |
| <i>ARID4A</i>    | NM_002892    | rs10747826 | 2.33E-02 | turquoise | 0.26396 |          |
| <i>ARID4A</i>    | NM_023000    | rs10747826 | 2.33E-02 | turquoise | 0.26374 |          |
| <i>ARID5A</i>    | NM_212481    | rs2579502  | 7.23E-03 | turquoise | 0.08685 |          |
| <i>ARID5A</i>    | NM_212481    | rs2579502  | 7.23E-03 | turquoise | 0.03499 |          |
| <i>ARL4</i>      | NM_005738    | rs2075508  | 2.61E-02 | turquoise | 0.75831 |          |
| <i>B3GAT2</i>    | NM_080742    | rs10780684 | 9.94E-04 | turquoise | 0.74612 |          |
| <i>BARD1</i>     | NM_000465    | rs10932568 | 4.44E-02 | turquoise | 0.72988 |          |
| <i>BRUNOL4</i>   | XM_943559    | NA         | NA       | turquoise | 0.87869 |          |
| <i>BTG3</i>      | NM_006806    | rs7036338  | 1.77E-02 | turquoise | 0.04945 |          |
| <i>C10orf132</i> | NM_001010917 | NA         | NA       | turquoise | 0.36218 |          |
| <i>C16orf60</i>  | NM_018455    | NA         | NA       | turquoise | 0.82299 |          |
| <i>C1orf108</i>  | NM_024595    | NA         | NA       | turquoise | 0.14327 |          |
| <i>C1orf88</i>   | NM_181643    | rs6542368  | 1.12E-02 | turquoise | 0.23827 |          |
| <i>C20orf133</i> | NM_001033086 | NA         | NA       | turquoise | 0.51662 |          |
| <i>C21orf88</i>  | NM_153754    | NA         | NA       | turquoise | 0.11214 |          |
| <i>C8orf46</i>   | NM_152765    | rs981369   | 8.29E-03 | turquoise | 0.21840 |          |
| <i>CA4</i>       | NM_000717    | rs6025643  | 1.37E-02 | turquoise | 0.11063 |          |
| <i>CACNA1C</i>   | NM_000719    | rs12985186 | 1.69E-04 | turquoise | 0.36768 | autism   |
| <i>CACNG2</i>    | NM_006078    | rs7120564  | 1.17E-03 | turquoise | 0.33753 | epilepsy |
| <i>CADPS</i>     | NM_183394    | rs7084300  | 1.44E-04 | turquoise | 0.76126 |          |
| <i>CAMK2G</i>    | NM_172169    | rs2242258  | 1.30E-03 | turquoise | 0.87942 |          |
| <i>CAST1</i>     | NM_015576    | NA         | NA       | turquoise | 0.75749 |          |
| <i>CCDC3</i>     | NM_031455    | rs13145438 | 8.10E-04 | turquoise | 0.47533 |          |
| <i>CCDC65</i>    | NM_033124    | rs698334   | 1.06E-03 | turquoise | 0.10778 |          |
| <i>CCKBR</i>     | NM_176875    | rs749005   | 4.38E-03 | turquoise | 0.32642 |          |
| <i>CCR7</i>      | NM_001838    | rs1077644  | 1.27E-03 | turquoise | 0.09344 |          |
| <i>CD247</i>     | NM_198053    | rs3820390  | 1.03E-02 | turquoise | 0.21660 |          |
| <i>CDCA4</i>     | NM_017955    | rs3924892  | 1.64E-02 | turquoise | 0.92693 |          |
| <i>CDKN2B</i>    | NM_078487    | rs7954180  | 7.51E-03 | turquoise | 0.04235 |          |
| <i>CDKN2C</i>    | NM_001262    | rs1341980  | 2.14E-02 | turquoise | 0.28940 |          |
| <i>CEACAM1</i>   | NM_001024912 | rs10165893 | 7.51E-04 | turquoise | 0.24260 |          |
| <i>CENPF</i>     | NM_016343    | rs1505374  | 8.92E-02 | turquoise | 0.72912 |          |
| <i>CHN2</i>      | NM_004067    | rs1958979  | 1.19E-03 | turquoise | 0.86788 |          |
| <i>CLTB</i>      | NM_007097    | rs1321776  | 1.23E-02 | turquoise | 0.31528 |          |
| <i>CNTNAP4</i>   | NM_033401    | rs2134837  | 8.66E-04 | turquoise | 0.74841 |          |
| <i>COL1A2</i>    | NM_000089    | rs11107845 | 4.18E-03 | turquoise | 0.79038 |          |
| <i>COL23A1</i>   | NM_173465    | rs625820   | 1.32E-02 | turquoise | 0.24625 |          |
| <i>COLQ</i>      | NM_080540    | NA         | NA       | turquoise | 0.20556 |          |
| <i>COMTD1</i>    | NM_144589    | rs720863   | 1.90E-02 | turquoise | 0.34791 |          |
| <i>CPA4</i>      | NM_016352    | rs1487608  | 3.32E-03 | turquoise | 0.62393 |          |
| <i>CPNE6</i>     | NM_006032    | rs1041350  | 9.81E-03 | turquoise | 0.44674 |          |

Supplementary Table 6

|                  |              |            |          |           |         |        |
|------------------|--------------|------------|----------|-----------|---------|--------|
| <i>CRMP1</i>     | NM_001014809 | rs13257249 | 3.89E-03 | turquoise | 0.79979 |        |
| <i>CTNNA2</i>    | NM_004389    | rs12574041 | 4.77E-04 | turquoise | 0.95179 |        |
| <i>CXCR4</i>     | NM_003467    | rs322240   | 4.82E-02 | turquoise | 0.12363 |        |
| <i>CXXC4</i>     | NM_025212    | rs1890227  | 3.09E-03 | turquoise | 0.19057 |        |
| <i>CYP26B1</i>   | NM_019885    | rs17780422 | 1.28E-03 | turquoise | 1.00000 |        |
| <i>CYP27B1</i>   | NM_000785    | rs12586157 | 1.48E-03 | turquoise | 0.03951 |        |
| <i>CYP2J2</i>    | NM_000775    | rs6842739  | 2.98E-03 | turquoise | 0.13751 |        |
| <i>DDX31</i>     | NM_138620    | rs4645436  | 2.58E-03 | turquoise | 0.09836 |        |
| <i>DISP2</i>     | NM_033510    | rs1002675  | 6.21E-04 | turquoise | 0.14309 |        |
| <i>DOT1L</i>     | NM_032482    | rs7127900  | 4.58E-03 | turquoise | 0.08545 |        |
| <i>DRD3</i>      | NM_000796    | rs10787493 | 1.50E-02 | turquoise | 0.71878 |        |
| <i>DSCAML1</i>   | NM_020693    | rs10934301 | 1.61E-03 | turquoise | 0.14395 |        |
| <i>DYRK1B</i>    | NM_006484    | rs6066149  | 2.75E-03 | turquoise | 0.14725 |        |
| <i>ECM2</i>      | NM_001393    | rs203132   | 1.89E-03 | turquoise | 0.53204 |        |
| <i>EEF1D</i>     | NM_032378    | rs13419007 | 3.63E-02 | turquoise | 0.25604 |        |
| <i>ELK4</i>      | NM_001973    | rs6661827  | 1.42E-02 | turquoise | 0.08153 |        |
| <i>ELL3</i>      | NM_025165    | rs7000214  | 1.70E-03 | turquoise | 0.19425 |        |
| <i>EMILIN1</i>   | NM_007046    | rs9554090  | 6.33E-03 | turquoise | 0.33183 |        |
| <i>EPAS1</i>     | NM_001430    | rs2839159  | 6.83E-04 | turquoise | 0.09788 |        |
| <i>EPHB1</i>     | NM_004441    | rs1364407  | 3.93E-03 | turquoise | 0.37119 |        |
| <i>ESPN</i>      | NM_031475    | rs9931078  | 4.00E-03 | turquoise | 0.03973 |        |
| <i>EZH2</i>      | NM_004456    | rs1995392  | 2.07E-03 | turquoise | 0.65362 |        |
| <i>FAIM</i>      | NM_001033030 | rs10106218 | 1.82E-03 | turquoise | 0.19339 |        |
| <i>FAM19A2</i>   | NM_178539    | rs13064050 | 5.02E-03 | turquoise | 0.27662 |        |
| <i>FAM5C</i>     | NM_199051    | rs16861729 | 3.76E-03 | turquoise | 0.05740 |        |
| <i>FBXO15</i>    | NM_152676    | rs11931604 | 3.70E-02 | turquoise | 0.56088 |        |
| <i>FLJ20097</i>  | NM_017667    | NA         | NA       | turquoise | 0.13880 |        |
| <i>FLJ23588</i>  | NM_022785    | NA         | NA       | turquoise | 0.37346 |        |
| <i>FLJ30596</i>  | NM_153013    | NA         | NA       | turquoise | 0.80010 |        |
| <i>FLJ32206</i>  | NM_152497    | NA         | NA       | turquoise | 0.23745 |        |
| <i>FLJ33590</i>  | NM_173821    | NA         | NA       | turquoise | 0.27038 |        |
| <i>FLRT2</i>     | NM_013231    | rs2011360  | 9.75E-04 | turquoise | 0.52125 |        |
| <i>FN5</i>       | NM_020179    | NA         | NA       | turquoise | 0.12201 |        |
| <i>FRAT1</i>     | NM_005479    | rs4735521  | 1.75E-02 | turquoise | 0.14324 |        |
| <i>FRMPD4</i>    | NM_014728    | NA         | NA       | turquoise | 0.34981 | autism |
| <i>FSTL5</i>     | NM_020116    | rs1936075  | 6.98E-05 | turquoise | 0.80066 |        |
| <i>GAD1</i>      | NM_013445    | rs16858988 | 6.89E-02 | turquoise | 0.85042 |        |
| <i>GAL</i>       | NM_015973    | rs12681862 | 1.04E-02 | turquoise | 0.89592 |        |
| <i>GALNTL2</i>   | NM_054110    | rs10803414 | 1.93E-03 | turquoise | 0.73972 |        |
| <i>GCHFR</i>     | NM_005258    | rs1393109  | 1.17E-03 | turquoise | 0.49289 |        |
| <i>GRIK1</i>     | NM_000830    | rs2394180  | 9.99E-04 | turquoise | 0.23625 |        |
| <i>GRIK1</i>     | NM_000830    | rs2394180  | 9.99E-04 | turquoise | 0.31449 |        |
| <i>GRIN1</i>     | NM_007327    | rs11776870 | 2.45E-03 | turquoise | 0.66966 |        |
| <i>GRM3</i>      | NM_000840    | rs2213468  | 1.14E-03 | turquoise | 0.77517 |        |
| <i>GRRP1</i>     | NM_024869    | rs2830038  | 6.21E-05 | turquoise | 0.15181 |        |
| <i>HERC6</i>     | NM_001013005 | NA         | NA       | turquoise | 0.67360 |        |
| <i>HIST1H2BD</i> | NM_138720    | rs16930371 | 8.98E-03 | turquoise | 0.12120 |        |
| <i>HIST1H2BG</i> | NM_003518    | rs768039   | 1.08E-02 | turquoise | 0.04054 |        |
| <i>HIST1H4H</i>  | NM_003543    | rs11247870 | 7.51E-03 | turquoise | 0.09402 |        |

Supplementary Table 6

|                  |              |            |          |           |         |        |
|------------------|--------------|------------|----------|-----------|---------|--------|
| <i>HOMER1</i>    | NM_004272    | rs11594398 | 2.12E-03 | turquoise | 0.10336 |        |
| <i>HPCAL4</i>    | NM_016257    | rs10483056 | 1.71E-03 | turquoise | 0.27359 |        |
| <i>HS3ST5</i>    | NM_153612    | rs12201804 | 2.28E-03 | turquoise | 0.40373 | autism |
| <i>IER2</i>      | NM_004907    | rs401326   | 1.14E-02 | turquoise | 0.13476 |        |
| <i>IFIT3</i>     | NM_001031683 | rs11203078 | 1.70E-02 | turquoise | 0.25968 |        |
| <i>IGFBP7</i>    | NM_001553    | rs11852448 | 1.04E-03 | turquoise | 0.76714 |        |
| <i>IGSF21</i>    | NM_032880    | rs2717756  | 3.20E-04 | turquoise | 0.75065 |        |
| <i>IKIP</i>      | NM_153687    | NA         | NA       | turquoise | 0.18512 |        |
| <i>IL1RAPL1</i>  | NM_014271    | NA         | NA       | turquoise | 0.32161 | autism |
| <i>IQCG</i>      | NM_032263    | rs1455357  | 7.94E-02 | turquoise | 0.39674 |        |
| <i>IRF5</i>      | NM_002200    | NA         | NA       | turquoise | 0.37698 |        |
| <i>ITGB8</i>     | NM_002214    | rs4982360  | 8.06E-04 | turquoise | 0.24216 |        |
| <i>JAKMIP2</i>   | NM_014790    | rs2373177  | 2.16E-04 | turquoise | 0.12724 |        |
| <i>JPH3</i>      | NM_020655    | rs10735255 | 1.01E-02 | turquoise | 0.95447 |        |
| <i>JPH4</i>      | NM_032452    | rs3794764  | 2.81E-03 | turquoise | 0.32220 |        |
| <i>JUP</i>       | NM_002230    | rs9306949  | 1.63E-03 | turquoise | 0.21402 |        |
| <i>KBTBD7</i>    | NM_032138    | rs2293690  | 2.67E-02 | turquoise | 0.07389 |        |
| <i>KCNT1</i>     | NM_020822    | rs545617   | 2.30E-03 | turquoise | 0.26290 |        |
| <i>KCTD16</i>    | NM_020768    | rs17409    | 3.18E-03 | turquoise | 0.33925 |        |
| <i>KIAA0368</i>  | NM_001080398 | rs11195623 | 1.06E-03 | turquoise | 0.63698 |        |
| <i>KIAA0460</i>  | NM_015203    | NA         | NA       | turquoise | 0.05302 |        |
| <i>KIAA1576</i>  | NM_020927    | NA         | NA       | turquoise | 0.29287 |        |
| <i>KIAA1904</i>  | NM_052906    | NA         | NA       | turquoise | 0.41784 |        |
| <i>KIF15</i>     | NM_020242    | rs6508902  | 1.67E-03 | turquoise | 0.46578 |        |
| <i>KLHL3</i>     | NM_017415    | rs1123819  | 6.72E-03 | turquoise | 0.33883 |        |
| <i>LAT2</i>      | NM_022040    | NA         | NA       | turquoise | 0.05651 |        |
| <i>LIAS</i>      | NM_194451    | rs2638863  | 5.33E-03 | turquoise | 0.10319 |        |
| <i>LIMK2</i>     | NM_001031801 | rs953326   | 2.56E-03 | turquoise | 0.38803 |        |
| <i>LIMK2</i>     | NM_001031801 | rs953326   | 2.56E-03 | turquoise | 0.48742 |        |
| <i>LIMK2</i>     | NM_016733    | rs953326   | 2.56E-03 | turquoise | 0.37666 |        |
| <i>LOC649387</i> | XM_945040    | NA         | NA       | turquoise | 0.41063 |        |
| <i>LOC728269</i> | NM_001080790 | NA         | NA       | turquoise | 0.02830 |        |
| <i>LOC90167</i>  | NM_194277    | NA         | NA       | turquoise | 0.73243 |        |
| <i>LOXL4</i>     | NM_032211    | rs2282432  | 1.89E-03 | turquoise | 0.46891 |        |
| <i>LRRRC6</i>    | NM_012472    | rs9419204  | 3.32E-04 | turquoise | 0.28271 |        |
| <i>LRRN6A</i>    | NM_032808    | NA         | NA       | turquoise | 0.66862 |        |
| <i>MED8</i>      | NM_001001651 | NA         | NA       | turquoise | 0.68395 |        |
| <i>MFSD4</i>     | NM_181644    | rs12080053 | 6.38E-03 | turquoise | 0.04146 |        |
| <i>MGC13024</i>  | NM_152288    | NA         | NA       | turquoise | 0.09362 |        |
| <i>MGC13057</i>  | NM_032321    | NA         | NA       | turquoise | 0.44906 |        |
| <i>MGC33530</i>  | NM_182546    | NA         | NA       | turquoise | 0.40416 |        |
| <i>MMP28</i>     | NM_001032278 | rs4867304  | 6.85E-03 | turquoise | 0.86057 |        |
| <i>MTUS1</i>     | NM_020749    | rs7241299  | 1.26E-02 | turquoise | 0.32881 |        |
| <i>MXI1</i>      | NM_005962    | rs11613438 | 6.58E-03 | turquoise | 0.72506 |        |
| <i>MYH9</i>      | NM_002473    | rs13219307 | 6.54E-03 | turquoise | 0.61476 |        |
| <i>MYT1L</i>     | NM_015025    | rs7568465  | 2.41E-03 | turquoise | 0.47875 |        |
| <i>NAPB</i>      | NM_022080    | rs10757418 | 9.84E-04 | turquoise | 0.92974 |        |
| <i>NDRG1</i>     | NM_006096    | rs6986474  | 4.53E-03 | turquoise | 0.22424 |        |
| <i>NDRG4</i>     | NM_020465    | rs890632   | 1.36E-03 | turquoise | 0.11369 |        |



Supplementary Table 6

|                     |              |            |          |           |         |        |
|---------------------|--------------|------------|----------|-----------|---------|--------|
| <i>NEDD4</i>        | NM_006154    | rs7236804  | 3.46E-03 | turquoise | 0.05014 |        |
| <i>NEK11</i>        | NM_145910    | rs1605327  | 2.31E-02 | turquoise | 0.77362 |        |
| <i>NGEF</i>         | NM_019850    | rs12409696 | 2.19E-02 | turquoise | 0.07612 |        |
| <i>NIN</i>          | NM_016350    | rs2282751  | 9.49E-04 | turquoise | 0.19363 |        |
| <i>NIN</i>          | NM_182945    | NA         | NA       | turquoise | 0.16697 |        |
| <i>NMU</i>          | NM_006681    | rs991335   | 1.99E-02 | turquoise | 0.26299 |        |
| <i>NOTCH4</i>       | NM_004557    | rs5927970  | 8.70E-04 | turquoise | 0.08194 |        |
| <i>NOX3</i>         | NM_015718    | rs1885560  | 1.33E-03 | turquoise | 0.38646 |        |
| <i>NRP2</i>         | NM_018534    | rs2241153  | 2.00E-02 | turquoise | 0.20784 |        |
| <i>NRP2</i>         | NM_201264    | rs849575   | 3.75E-02 | turquoise | 0.21111 |        |
| <i>NRXN1</i>        | NM_138735    | rs739431   | 8.66E-04 | turquoise | 0.59804 | autism |
| <i>NTN4</i>         | NM_021229    | rs4538949  | 3.16E-03 | turquoise | 0.79270 |        |
| <i>NUP188</i>       | NM_015354    | rs10014141 | 1.10E-02 | turquoise | 0.75462 |        |
| <i>NUP98</i>        | NM_139131    | rs8046065  | 2.38E-03 | turquoise | 0.09913 |        |
| <i>OLFM1</i>        | NM_006334    | rs2317349  | 5.99E-02 | turquoise | 0.25052 |        |
| <i>OLFM4</i>        | NM_006418    | rs7586951  | 3.12E-02 | turquoise | 0.33050 |        |
| <i>OLFML2A</i>      | NM_182487    | rs2299542  | 1.64E-02 | turquoise | 0.36614 |        |
| <i>OR111</i>        | NM_001004713 | rs268379   | 1.31E-03 | turquoise | 0.01775 |        |
| <i>PABPC5</i>       | NM_080832    | NA         | NA       | turquoise | 0.03782 |        |
| <i>PACIN1</i>       | NM_020804    | rs558317   | 2.00E-04 | turquoise | 0.78831 |        |
| <i>PCDH7</i>        | NM_002589    | rs2313742  | 2.10E-04 | turquoise | 0.07805 |        |
| <i>PCGF6</i>        | NM_032154    | rs4946582  | 3.63E-03 | turquoise | 0.03308 |        |
| <i>PDE4D</i>        | NM_006203    | rs1080256  | 6.99E-05 | turquoise | 0.67906 |        |
| <i>PDE4DIP</i>      | NM_001002811 | rs1422711  | 2.22E-02 | turquoise | 0.17797 |        |
| <i>PDGFRA</i>       | NM_006206    | rs2133471  | 4.41E-03 | turquoise | 0.22592 |        |
| <i>PDLIM1</i>       | NM_020992    | rs12640523 | 3.49E-04 | turquoise | 0.68041 |        |
| <i>PDZRN3</i>       | XM_946222    | NA         | NA       | turquoise | 0.12154 |        |
| <i>PIM3</i>         | NM_001001852 | rs9591249  | 1.63E-02 | turquoise | 0.37432 |        |
| <i>PKNOX2</i>       | NM_022062    | rs6758687  | 4.42E-03 | turquoise | 0.23918 |        |
| <i>PLCD4</i>        | NM_032726    | rs11806418 | 4.69E-02 | turquoise | 0.40090 |        |
| <i>PLCXD3</i>       | NM_001005473 | rs12584909 | 3.64E-04 | turquoise | 0.30004 |        |
| <i>PLEKHA6</i>      | NM_014935    | rs6722215  | 7.79E-03 | turquoise | 0.47288 |        |
| <i>PPAPDC3</i>      | NM_032728    | rs2260983  | 7.12E-03 | turquoise | 0.15656 |        |
| <i>PPP2R2C</i>      | NM_181876    | rs1428986  | 1.31E-03 | turquoise | 0.97416 |        |
| <i>PPP2R2C</i>      | NM_181876    | rs1428986  | 1.31E-03 | turquoise | 0.82257 |        |
| <i>PPT2</i>         | NM_138717    | rs1531746  | 2.37E-02 | turquoise | 0.09789 |        |
| <i>PRG-3</i>        | NM_017753    | NA         | NA       | turquoise | 0.69859 |        |
| <i>PRKDC</i>        | NM_006904    | rs8092993  | 5.16E-03 | turquoise | 0.43998 |        |
| <i>PROCR</i>        | NM_006404    | rs7845697  | 9.22E-03 | turquoise | 0.21491 |        |
| <i>PTDSR</i>        | NM_015167    | NA         | NA       | turquoise | 0.63540 |        |
| <i>PTHR2</i>        | NM_005048    | NA         | NA       | turquoise | 0.85976 |        |
| <i>PUS1</i>         | NM_001002019 | rs4863907  | 2.93E-02 | turquoise | 0.08134 |        |
| <i>RAB33B</i>       | NM_031296    | rs2471083  | 4.36E-02 | turquoise | 0.17645 |        |
| <i>RARRES1</i>      | NM_206963    | rs10515809 | 3.13E-02 | turquoise | 0.65362 |        |
| <i>RGC32</i>        | NM_014059    | NA         | NA       | turquoise | 0.88424 |        |
| <i>RGS9BP</i>       | NM_207391    | rs1952566  | 5.27E-02 | turquoise | 0.19283 |        |
| <i>RIMBP2</i>       | NM_015347    | rs3021211  | 1.18E-03 | turquoise | 0.37645 |        |
| <i>RLN3</i>         | NM_080864    | rs11718142 | 1.16E-02 | turquoise | 0.18293 |        |
| <i>RP13-15M17.2</i> | NM_001010866 | NA         | NA       | turquoise | 0.13350 |        |

Supplementary Table 6

|                 |              |            |          |           |         |        |
|-----------------|--------------|------------|----------|-----------|---------|--------|
| <i>RUNX2</i>    | NM_001024630 | rs875511   | 5.38E-03 | turquoise | 0.27036 |        |
| <i>SCARA3</i>   | NM_182826    | rs929620   | 1.23E-02 | turquoise | 0.77825 |        |
| <i>SEMA3A</i>   | NM_006080    | rs12057062 | 4.63E-03 | turquoise | 0.70395 |        |
| <i>SH3GL3</i>   | NM_003027    | rs1079242  | 1.06E-03 | turquoise | 0.50793 |        |
| <i>SHB</i>      | NM_003028    | rs7081464  | 1.72E-03 | turquoise | 0.79650 |        |
| <i>SLC22A15</i> | NM_018420    | rs12202641 | 1.70E-04 | turquoise | 0.82080 |        |
| <i>SLC22A5</i>  | NM_003060    | rs10988554 | 1.14E-02 | turquoise | 0.40618 |        |
| <i>SLC36A1</i>  | NM_078483    | rs4134337  | 1.56E-02 | turquoise | 0.13509 |        |
| <i>SLC5A3</i>   | NM_006933    | rs5971861  | 4.99E-03 | turquoise | 0.06634 |        |
| <i>SLC9A6</i>   | NM_006359    | NA         | NA       | turquoise | 0.76356 | autism |
| <i>SLITRK5</i>  | NM_015567    | rs1414007  | 1.10E-02 | turquoise | 0.18504 |        |
| <i>SMC2</i>     | NM_001042550 | rs2725762  | 2.61E-02 | turquoise | 0.20995 |        |
| <i>SMC4</i>     | NM_001002800 | rs1898871  | 4.37E-02 | turquoise | 0.65605 |        |
| <i>SNX10</i>    | NM_013322    | rs2830038  | 6.21E-05 | turquoise | 0.19253 |        |
| <i>SORCS1</i>   | NM_001013031 | rs6643458  | 5.10E-05 | turquoise | 0.53771 |        |
| <i>SP4</i>      | NM_003112    | rs10437776 | 2.43E-03 | turquoise | 0.28952 |        |
| <i>SPARCL1</i>  | NM_004684    | rs2142195  | 2.46E-02 | turquoise | 0.31149 |        |
| <i>SPATA20</i>  | NM_022827    | rs2965069  | 1.04E-03 | turquoise | 0.64664 |        |
| <i>SPC24</i>    | NM_182513    | rs1547222  | 2.21E-02 | turquoise | 0.82161 |        |
| <i>SPTBN4</i>   | NM_025213    | rs6429566  | 4.80E-03 | turquoise | 0.55979 |        |
| <i>ST3GAL1</i>  | NM_173344    | rs7628262  | 1.36E-02 | turquoise | 0.67113 |        |
| <i>STAMBPL1</i> | NM_020799    | rs1370018  | 9.49E-03 | turquoise | 0.41173 |        |
| <i>STARD10</i>  | NM_006645    | rs1727668  | 5.62E-03 | turquoise | 0.23136 |        |
| <i>STK6P</i>    | NR_001587    | NA         | NA       | turquoise | 0.03309 |        |
| <i>STX1A</i>    | NM_004603    | rs10868936 | 3.18E-02 | turquoise | 0.22042 |        |
| <i>SULT4A1</i>  | NM_176874    | NA         | NA       | turquoise | 0.45431 |        |
| <i>SYT13</i>    | NM_020826    | rs12712937 | 3.03E-03 | turquoise | 0.63419 |        |
| <i>TAGLN</i>    | NM_003186    | rs2145357  | 2.99E-03 | turquoise | 0.95182 |        |
| <i>TBC1D17</i>  | NM_024682    | rs4811794  | 7.05E-02 | turquoise | 0.09011 |        |
| <i>TCBA1</i>    | NM_153355    | NA         | NA       | turquoise | 0.40657 |        |
| <i>TESC</i>     | NM_017899    | rs763229   | 6.19E-04 | turquoise | 0.88237 |        |
| <i>THAP8</i>    | NM_152658    | rs7955255  | 1.45E-03 | turquoise | 0.06400 |        |
| <i>TMEM107</i>  | NM_032354    | rs2149111  | 1.36E-02 | turquoise | 0.82122 |        |
| <i>TMIE</i>     | NM_147196    | rs17118127 | 4.87E-03 | turquoise | 0.11361 |        |
| <i>TOP2A</i>    | NM_001067    | rs2942382  | 3.35E-03 | turquoise | 0.82402 |        |
| <i>TP53INP1</i> | NM_033285    | rs11854727 | 2.92E-03 | turquoise | 0.41755 |        |
| <i>TRAF4</i>    | NM_004295    | rs2339940  | 1.46E-02 | turquoise | 0.04734 |        |
| <i>TRSPAP1</i>  | NR_003109    | NA         | NA       | turquoise | 0.18838 |        |
| <i>TXNDC4</i>   | NM_015051    | NA         | NA       | turquoise | 0.12807 |        |
| <i>VASP</i>     | NM_001008736 | NA         | NA       | turquoise | 0.32599 |        |
| <i>VAV3</i>     | NM_006113    | rs8676     | 3.88E-03 | turquoise | 0.13341 |        |
| <i>VAX1</i>     | NM_199131    | rs10774538 | 1.20E-02 | turquoise | 0.25947 |        |
| <i>WDR31</i>    | NM_145241    | rs3827739  | 3.63E-02 | turquoise | 0.13433 |        |
| <i>WDR69</i>    | NM_178821    | rs13405511 | 4.91E-02 | turquoise | 0.87089 |        |
| <i>WDRPUH</i>   | NM_145054    | rs2654718  | 2.71E-03 | turquoise | 0.31704 |        |
| <i>WTIP</i>     | NM_001080436 | rs4989895  | 1.27E-02 | turquoise | 0.14338 |        |
| <i>WTIP</i>     | XM_059037    | NA         | NA       | turquoise | 0.12504 |        |
| <i>XKR4</i>     | NM_052898    | rs860324   | 8.88E-04 | turquoise | 0.77753 |        |
| <i>YBX2</i>     | NM_015982    | rs724940   | 1.79E-02 | turquoise | 0.20420 |        |

Supplementary Table 6

|                  |                 |            |          |           |         |        |
|------------------|-----------------|------------|----------|-----------|---------|--------|
| <i>YPEL2</i>     | NM_001005404    | rs2133471  | 4.41E-03 | turquoise | 0.27501 |        |
| <i>ZNF167</i>    | NM_025169       | rs6932104  | 1.35E-02 | turquoise | 0.10628 |        |
| <i>ZNF323</i>    | NM_030899       | rs2831524  | 2.91E-03 | turquoise | 0.07212 |        |
| <i>ZNF404</i>    | NM_001033719    | rs2015487  | 8.89E-02 | turquoise | 0.59636 |        |
| <i>ZNF425</i>    | NM_001001661    | rs10935663 | 2.96E-02 | turquoise | 0.17798 |        |
| <i>ZNF575</i>    | NM_174945       | rs9591249  | 1.63E-02 | turquoise | 0.06755 |        |
| <i>ZNF658</i>    | NM_033160       | rs9369223  | 5.00E-03 | turquoise | 0.14385 |        |
|                  | 4-Sep NM_019106 | NA         | NA       | yellow    | 0.92147 |        |
| <i>ABAT</i>      | NM_020686       | rs7257704  | 4.56E-03 | yellow    | 0.97071 |        |
| <i>ABHD14A</i>   | NM_015407       | rs6499586  | 1.02E-02 | yellow    | 0.68906 |        |
| <i>ADA</i>       | NM_000022       | rs7214096  | 8.86E-03 | yellow    | 0.84753 | autism |
| <i>ADAM12</i>    | NM_021641       | rs9491849  | 4.77E-05 | yellow    | 0.79961 |        |
| <i>AGT</i>       | NM_000029       | rs7582313  | 8.84E-02 | yellow    | 0.95374 |        |
| <i>AKR1C3</i>    | NM_003739       | rs5961642  | 2.79E-03 | yellow    | 0.92197 |        |
| <i>ALK</i>       | NM_004304       | rs2394180  | 9.99E-04 | yellow    | 0.91102 |        |
| <i>ANKS1B</i>    | NM_181670       | rs1474620  | 1.64E-03 | yellow    | 0.83118 |        |
| <i>APEX2</i>     | NM_014481       | NA         | NA       | yellow    | 0.86816 |        |
| <i>APOBEC3B</i>  | NM_004900       | rs12908846 | 8.60E-03 | yellow    | 0.89315 |        |
| <i>APRT</i>      | NM_001030018    | rs9300794  | 6.56E-03 | yellow    | 0.76910 |        |
| <i>AQP4</i>      | NM_004028       | rs10485011 | 1.02E-02 | yellow    | 0.84114 |        |
| <i>ATAD3A</i>    | NM_018188       | rs7602332  | 2.50E-03 | yellow    | 0.74883 |        |
| <i>ATCAY</i>     | NM_033064       | rs6052147  | 2.63E-03 | yellow    | 0.88374 |        |
| <i>ATP1B2</i>    | NM_001678       | rs6108011  | 2.68E-02 | yellow    | 0.91642 |        |
| <i>AXIN2</i>     | NM_004655       | rs1981138  | 1.67E-02 | yellow    | 0.85625 |        |
| <i>BAIAP3</i>    | NM_003933       | rs1538721  | 1.48E-03 | yellow    | 0.95635 |        |
| <i>BAZ2B</i>     | NM_013450       | rs9833196  | 8.31E-04 | yellow    | 0.76298 |        |
| <i>BCAN</i>      | NM_198427       | rs11971331 | 3.29E-02 | yellow    | 0.93133 |        |
| <i>BCAR3</i>     | NM_003567       | rs11107845 | 4.18E-03 | yellow    | 0.74369 |        |
| <i>BCL11A</i>    | NM_022893       | rs7071102  | 6.66E-03 | yellow    | 0.84798 |        |
| <i>BCL11A</i>    | NM_138553       | NA         | NA       | yellow    | 0.85864 |        |
| <i>BEX2</i>      | NM_032621       | NA         | NA       | yellow    | 0.87221 |        |
| <i>BID</i>       | NM_001196       | rs11057006 | 6.42E-03 | yellow    | 0.76240 |        |
| <i>BID</i>       | NM_197967       | rs11057006 | 6.42E-03 | yellow    | 0.75120 |        |
| <i>BOP1</i>      | NM_015201       | rs4681527  | 2.57E-02 | yellow    | 0.95826 |        |
| <i>BRI3BP</i>    | NM_080626       | rs2611428  | 4.50E-03 | yellow    | 0.74823 |        |
| <i>BTG1</i>      | NM_001731       | rs1957082  | 2.29E-02 | yellow    | 0.91089 |        |
| <i>C14orf149</i> | NM_144581       | rs2412907  | 9.49E-04 | yellow    | 0.93888 |        |
| <i>C15orf23</i>  | NM_033286       | rs4530278  | 4.17E-03 | yellow    | 0.95384 |        |
| <i>C15orf27</i>  | NM_152335       | rs2955742  | 3.09E-03 | yellow    | 0.84136 |        |
| <i>C18orf56</i>  | NM_001012716    | rs7298096  | 1.07E-02 | yellow    | 0.64253 |        |
| <i>C19orf4</i>   | NM_012109       | NA         | NA       | yellow    | 0.89725 |        |
| <i>C1orf24</i>   | NM_022083       | NA         | NA       | yellow    | 0.93490 |        |
| <i>C1QL1</i>     | NM_006688       | rs11577388 | 5.16E-03 | yellow    | 0.73679 |        |
| <i>C20orf27</i>  | NM_017874       | NA         | NA       | yellow    | 0.82128 |        |
| <i>C3orf26</i>   | NM_032359       | rs11765661 | 5.04E-03 | yellow    | 0.86136 |        |
| <i>C4orf34</i>   | NM_174921       | rs2836850  | 5.12E-04 | yellow    | 0.88064 |        |
| <i>C6orf153</i>  | NM_033112       | NA         | NA       | yellow    | 0.82235 |        |
| <i>C8orf4</i>    | NM_020130       | rs7972858  | 8.65E-03 | yellow    | 0.80722 |        |
| <i>CAMK2B</i>    | NM_172080       | rs7326252  | 1.49E-04 | yellow    | 0.73581 |        |

Supplementary Table 6

|                 |              |            |          |        |         |        |
|-----------------|--------------|------------|----------|--------|---------|--------|
| <i>CASP3</i>    | NM_032991    | rs11683056 | 5.15E-02 | yellow | 0.89805 |        |
| <i>CASP7</i>    | NM_033339    | rs546464   | 1.13E-03 | yellow | 0.75630 |        |
| <i>CCPG1</i>    | NM_004748    | rs17832328 | 4.52E-03 | yellow | 0.97058 |        |
| <i>CD151</i>    | NM_004357    | rs11908221 | 9.26E-03 | yellow | 0.95819 |        |
| <i>CD151</i>    | NM_139030    | rs11908221 | 9.26E-03 | yellow | 0.75077 |        |
| <i>CD38</i>     | NM_001775    | rs13193457 | 2.41E-03 | yellow | 0.90643 |        |
| <i>CD97</i>     | NM_078481    | rs13081924 | 1.52E-02 | yellow | 0.82799 |        |
| <i>CEBPD</i>    | NM_005195    | rs9535207  | 2.98E-04 | yellow | 0.91879 |        |
| <i>CEP68</i>    | NM_015147    | rs17750984 | 1.23E-02 | yellow | 0.76325 |        |
| <i>CEP70</i>    | NM_024491    | rs6954902  | 1.26E-02 | yellow | 0.87786 |        |
| <i>CGI-96</i>   | NM_015703    | NA         | NA       | yellow | 0.83159 |        |
| <i>CHEK1</i>    | NM_001274    | rs13015323 | 9.11E-03 | yellow | 0.93074 |        |
| <i>CLIC1</i>    | NM_001288    | rs7787057  | 1.24E-02 | yellow | 0.94956 |        |
| <i>CLU</i>      | NM_001831    | rs11074865 | 5.19E-02 | yellow | 0.86774 |        |
| <i>COPS6</i>    | NM_006833    | rs1335270  | 6.02E-03 | yellow | 0.63919 |        |
| <i>CPT1C</i>    | NM_152359    | rs930185   | 4.24E-03 | yellow | 0.82217 |        |
| <i>CPVL</i>     | NM_031311    | rs4893602  | 4.60E-04 | yellow | 0.79952 |        |
| <i>CREG1</i>    | NM_003851    | rs221726   | 7.09E-02 | yellow | 0.97744 |        |
| <i>CRYL1</i>    | NM_015974    | rs11739635 | 3.90E-03 | yellow | 0.90290 |        |
| <i>CSMD2</i>    | NM_052896    | rs923881   | 1.80E-03 | yellow | 0.75691 |        |
| <i>CSNK1E</i>   | NM_152221    | rs7146299  | 1.13E-02 | yellow | 0.69281 |        |
| <i>CSPG5</i>    | NM_006574    | rs698334   | 1.06E-03 | yellow | 0.88602 |        |
| <i>CTSC</i>     | NM_001814    | rs645063   | 4.75E-03 | yellow | 0.95820 |        |
| <i>CTSC</i>     | NM_001814    | rs645063   | 4.75E-03 | yellow | 0.97696 |        |
| <i>CUGBP2</i>   | NM_006561    | NA         | NA       | yellow | 0.90792 |        |
| <i>CYB5R2</i>   | NM_016229    | rs12448409 | 5.66E-06 | yellow | 0.79528 |        |
| <i>CYP21A2</i>  | NM_000500    | rs12454634 | 3.11E-03 | yellow | 0.90302 |        |
| <i>CYP26A1</i>  | NM_057157    | rs10786069 | 1.66E-02 | yellow | 0.86692 |        |
| <i>CYP46A1</i>  | NM_006668    | rs1441383  | 3.46E-03 | yellow | 0.86818 |        |
| <i>CYP4V2</i>   | NM_207352    | rs2595381  | 3.61E-02 | yellow | 0.83475 |        |
| <i>D4S234E</i>  | NM_014392    | rs350181   | 3.32E-03 | yellow | 0.99452 |        |
| <i>DBX2</i>     | NM_001004329 | rs766117   | 8.23E-03 | yellow | 0.88951 |        |
| <i>DCAMKL1</i>  | NM_004734    | NA         | NA       | yellow | 0.95896 |        |
| <i>DDX10</i>    | NM_004398    | rs1999487  | 4.23E-03 | yellow | 0.80163 |        |
| <i>DLEC1</i>    | NM_007337    | rs11070241 | 4.65E-03 | yellow | 0.91058 |        |
| <i>DLX1</i>     | NM_178120    | rs13390848 | 5.30E-02 | yellow | 0.95686 | autism |
| <i>DLX1</i>     | NM_001038493 | rs13390848 | 5.30E-02 | yellow | 0.70319 |        |
| <i>DMRT2</i>    | NM_181872    | rs789029   | 4.51E-03 | yellow | 0.59767 |        |
| <i>DNASE2</i>   | NM_001375    | rs1469217  | 5.93E-03 | yellow | 0.81671 |        |
| <i>DSU</i>      | NM_018000    | NA         | NA       | yellow | 0.93223 |        |
| <i>EDN3</i>     | NM_207033    | rs1755834  | 1.03E-03 | yellow | 0.82254 |        |
| <i>ELAVL3</i>   | NM_001420    | rs2454803  | 2.37E-02 | yellow | 0.94428 |        |
| <i>ELAVL4</i>   | NM_021952    | rs6944602  | 5.99E-03 | yellow | 0.92221 |        |
| <i>Ells1</i>    | NM_152793    | NA         | NA       | yellow | 0.97658 |        |
| <i>EMG1</i>     | NM_006331    | rs2149642  | 3.22E-03 | yellow | 0.65829 |        |
| <i>EML1</i>     | NM_004434    | rs17418706 | 1.67E-04 | yellow | 0.97495 |        |
| <i>EML1</i>     | NM_004434    | rs17418706 | 1.67E-04 | yellow | 0.91521 |        |
| <i>EPB41L4B</i> | NM_019114    | rs10505135 | 3.90E-03 | yellow | 0.82053 |        |
| <i>FAM20C</i>   | NM_020223    | rs11991825 | 7.61E-03 | yellow | 0.56696 |        |

Supplementary Table 6

|                  |              |            |          |        |         |
|------------------|--------------|------------|----------|--------|---------|
| <i>FASN</i>      | NM_004104    | rs17098287 | 3.30E-03 | yellow | 0.80986 |
| <i>FBN3</i>      | NM_032447    | rs4747647  | 1.20E-02 | yellow | 0.86801 |
| <i>FLJ13912</i>  | NM_022770    | NA         | NA       | yellow | 0.86869 |
| <i>FLJ90805</i>  | NM_173633    | NA         | NA       | yellow | 0.89959 |
| <i>FLYWCH1</i>   | NM_032296    | rs11719615 | 4.78E-03 | yellow | 0.84026 |
| <i>FOLR1</i>     | NM_016724    | rs1043149  | 4.19E-02 | yellow | 0.96943 |
| <i>FOLR1</i>     | NM_016724    | rs1043149  | 4.19E-02 | yellow | 0.98240 |
| <i>FYN</i>       | NM_153047    | rs475620   | 2.34E-03 | yellow | 0.83070 |
| <i>FZD9</i>      | NM_003508    | rs17731153 | 1.57E-04 | yellow | 0.88383 |
| <i>G3BP1</i>     | NM_198395    | rs4725434  | 9.55E-04 | yellow | 0.79723 |
| <i>G6PD</i>      | NM_000402    | NA         | NA       | yellow | 0.83309 |
| <i>GAP43</i>     | NM_002045    | rs10934301 | 1.61E-03 | yellow | 0.79960 |
| <i>GAS6</i>      | NM_000820    | rs4608128  | 3.36E-03 | yellow | 0.91584 |
| <i>GAS6</i>      | XM_942084    | NA         | NA       | yellow | 0.95645 |
| <i>GATS</i>      | NM_178831    | rs2157372  | 9.21E-03 | yellow | 0.97118 |
| <i>GDPD5</i>     | NM_030792    | rs1789250  | 9.51E-04 | yellow | 0.94691 |
| <i>GLT25D1</i>   | NM_024656    | rs878545   | 6.43E-03 | yellow | 0.89155 |
| <i>GLYCTK</i>    | NM_145262    | rs11973288 | 2.41E-02 | yellow | 0.83866 |
| <i>GPNMB</i>     | NM_001005340 | rs7864583  | 4.09E-03 | yellow | 0.92908 |
| <i>GPNMB</i>     | NM_002510    | rs7864583  | 4.09E-03 | yellow | 0.97661 |
| <i>GPR37L1</i>   | NM_004767    | rs3795596  | 1.61E-01 | yellow | 0.96299 |
| <i>GYG2</i>      | NM_003918    | NA         | NA       | yellow | 0.90166 |
| <i>H2AFY</i>     | NM_138609    | rs9857979  | 8.80E-04 | yellow | 0.81026 |
| <i>HLA-E</i>     | NM_005516    | rs4867276  | 5.35E-03 | yellow | 0.81200 |
| <i>HMMR</i>      | NM_012484    | rs4856711  | 3.15E-02 | yellow | 0.79406 |
| <i>HPRT1</i>     | NM_000194    | NA         | NA       | yellow | 0.94236 |
| <i>HSA9761</i>   | NM_014473    | NA         | NA       | yellow | 0.83741 |
| <i>IBRDC1</i>    | NM_152553    | NA         | NA       | yellow | 0.83739 |
| <i>ID1</i>       | NM_181353    | rs7997640  | 6.64E-03 | yellow | 0.77972 |
| <i>IER3</i>      | NM_052815    | NA         | NA       | yellow | 0.92507 |
| <i>IGFBP5</i>    | NM_000599    | rs2067041  | 6.96E-02 | yellow | 0.89647 |
| <i>IGSF3</i>     | NM_001542    | rs6703791  | 1.82E-02 | yellow | 0.93000 |
| <i>IGSF4B</i>    | NM_021189    | NA         | NA       | yellow | 0.89952 |
| <i>IL1RAP</i>    | NM_002182    | rs6434455  | 3.67E-03 | yellow | 0.79888 |
| <i>IRAK1</i>     | NM_001025243 | NA         | NA       | yellow | 0.84202 |
| <i>ITGA3</i>     | NM_002204    | rs875511   | 5.38E-03 | yellow | 0.81280 |
| <i>ITGB4</i>     | NM_001005619 | rs1351419  | 4.06E-04 | yellow | 0.80956 |
| <i>KCNIP1</i>    | NM_014592    | rs7591026  | 6.64E-03 | yellow | 0.74305 |
| <i>KCNJ13</i>    | NM_002242    | rs7564410  | 3.17E-01 | yellow | 0.80115 |
| <i>KCNK2</i>     | NM_001017424 | rs17274552 | 1.30E-02 | yellow | 0.70120 |
| <i>KIAA0256</i>  | NM_014701    | NA         | NA       | yellow | 0.92540 |
| <i>KIAA0828</i>  | NM_015328    | NA         | NA       | yellow | 0.84713 |
| <i>KIDINS220</i> | NM_020738    | rs688523   | 3.62E-03 | yellow | 0.82249 |
| <i>KIF3C</i>     | NM_002254    | rs4307059  | 1.07E-05 | yellow | 0.75204 |
| <i>KLF12</i>     | NM_007249    | rs10879852 | 1.42E-03 | yellow | 0.93327 |
| <i>LAMA2</i>     | NM_000426    | rs3807120  | 5.20E-04 | yellow | 0.82479 |
| <i>LGR4</i>      | NM_018490    | rs10506018 | 4.81E-03 | yellow | 0.83109 |
| <i>LIX1</i>      | NM_153234    | rs9556658  | 4.81E-03 | yellow | 0.85941 |
| <i>LOC144501</i> | NM_182507    | NA         | NA       | yellow | 0.84337 |

Supplementary Table 6

|                  |              |            |          |        |         |        |
|------------------|--------------|------------|----------|--------|---------|--------|
| <i>LOC285016</i> | NM_001002919 | NA         | NA       | yellow | 0.88476 |        |
| <i>LOC388419</i> | NM_001080466 | NA         | NA       | yellow | 0.87030 |        |
| <i>LOC402055</i> | NM_001013694 | NA         | NA       | yellow | 0.74430 |        |
| <i>LOC91689</i>  | NM_033318    | NA         | NA       | yellow | 0.92233 |        |
| <i>LPHN1</i>     | NM_014921    | rs724015   | 7.97E-03 | yellow | 0.86811 |        |
| <i>LY6H</i>      | NM_002347    | rs1476736  | 4.14E-02 | yellow | 0.92973 |        |
| <i>LY6H</i>      | XM_937329    | NA         | NA       | yellow | 0.92641 |        |
| <i>MAP6</i>      | NM_207577    | rs2134837  | 8.66E-04 | yellow | 0.82739 |        |
| <i>MAPK10</i>    | NM_138980    | rs3860946  | 3.01E-03 | yellow | 0.98562 |        |
| <i>MAPK10</i>    | NM_138980    | rs3860946  | 3.01E-03 | yellow | 0.88207 |        |
| <i>MAPK10</i>    | NM_138980    | rs3860946  | 3.01E-03 | yellow | 0.86712 |        |
| <i>MAPK4</i>     | NM_002747    | rs2839159  | 6.83E-04 | yellow | 0.84139 |        |
| <i>MAPKAP1</i>   | NM_001006618 | rs4646703  | 1.03E-02 | yellow | 0.65359 |        |
| <i>MAPT</i>      | NM_016841    | rs10742587 | 2.09E-03 | yellow | 1.00000 |        |
| <i>METTL7A</i>   | NM_014033    | rs2498472  | 2.44E-02 | yellow | 0.75340 |        |
| <i>MOAP1</i>     | NM_022151    | rs12594014 | 1.40E-02 | yellow | 0.85670 |        |
| <i>MRCL3</i>     | NM_006471    | NA         | NA       | yellow | 0.80601 |        |
| <i>MRPL12</i>    | NM_002949    | rs10162548 | 1.37E-03 | yellow | 0.79110 |        |
| <i>MRRF</i>      | NM_138777    | rs1011151  | 1.48E-03 | yellow | 0.84313 |        |
| <i>MTHFD1</i>    | NM_005956    | rs1002446  | 2.32E-03 | yellow | 0.83367 |        |
| <i>MUM1</i>      | NM_032853    | rs10809917 | 2.22E-03 | yellow | 0.75411 |        |
| <i>MVD</i>       | NM_002461    | rs4932449  | 1.87E-02 | yellow | 0.84228 |        |
| <i>MXD4</i>      | NM_006454    | rs17659078 | 6.92E-03 | yellow | 0.92930 |        |
| <i>MYO5A</i>     | NM_000259    | rs913465   | 3.20E-03 | yellow | 0.81440 |        |
| <i>MYOHD1</i>    | NM_001033580 | NA         | NA       | yellow | 0.74298 |        |
| <i>NCOA1</i>     | NM_147223    | rs2975186  | 1.78E-03 | yellow | 0.95359 |        |
| <i>NCOA3</i>     | NM_006534    | rs10493120 | 4.23E-03 | yellow | 0.87024 |        |
| <i>NDVIP1</i>    | NM_030571    | rs891989   | 2.61E-02 | yellow | 0.80672 |        |
| <i>NEFL</i>      | NM_006158    | rs10248878 | 6.66E-03 | yellow | 0.92577 |        |
| <i>NETO1</i>     | NM_153181    | rs10997574 | 1.36E-03 | yellow | 0.97115 |        |
| <i>NETO1</i>     | NM_138999    | rs6566663  | 1.53E-03 | yellow | 0.95578 |        |
| <i>NME1</i>      | NM_000269    | rs11702684 | 1.83E-03 | yellow | 0.70074 |        |
| <i>NME1</i>      | NM_198175    | rs11702684 | 1.83E-03 | yellow | 0.89473 |        |
| <i>NRXN2</i>     | NM_015080    | rs1034505  | 3.37E-03 | yellow | 0.92006 |        |
| <i>NSDHL</i>     | NM_015922    | NA         | NA       | yellow | 0.91969 |        |
| <i>NT5E</i>      | NM_002526    | rs10735255 | 1.01E-02 | yellow | 0.85844 |        |
| <i>OLFM2</i>     | NM_058164    | rs3786095  | 1.84E-04 | yellow | 0.66330 |        |
| <i>OMG</i>       | NM_002544    | rs17309356 | 6.70E-03 | yellow | 0.95697 |        |
| <i>OSBPL10</i>   | NM_017784    | rs17508455 | 4.07E-04 | yellow | 0.76324 |        |
| <i>P2RX4</i>     | NM_175568    | NA         | NA       | yellow | 0.78902 |        |
| <i>PA2G4</i>     | NM_006191    | rs354211   | 4.79E-03 | yellow | 0.79799 |        |
| <i>PAK1</i>      | NM_002576    | rs1176811  | 1.63E-03 | yellow | 0.94299 |        |
| <i>PAQR6</i>     | NM_024897    | rs1444676  | 4.40E-02 | yellow | 0.90991 |        |
| <i>PAQR6</i>     | NM_198406    | rs1444676  | 4.40E-02 | yellow | 0.95025 |        |
| <i>PCDH9</i>     | NM_020403    | rs10492203 | 5.23E-04 | yellow | 0.70446 | autism |
| <i>PCOLCE2</i>   | NM_013363    | rs9484795  | 3.31E-02 | yellow | 0.84013 |        |
| <i>PCP4</i>      | NM_006198    | rs3783167  | 2.13E-04 | yellow | 0.93724 |        |
| <i>PDLIM3</i>    | NM_014476    | rs9832000  | 2.27E-02 | yellow | 0.91617 |        |
| <i>PFKP</i>      | NM_002627    | rs2551043  | 3.62E-03 | yellow | 0.85092 |        |

Supplementary Table 6

|                    |              |            |          |        |         |        |
|--------------------|--------------|------------|----------|--------|---------|--------|
| <i>PHKG1</i>       | NM_006213    | rs3741414  | 1.07E-02 | yellow | 0.88957 |        |
| <i>PHYHIPL</i>     | NM_032439    | rs7071102  | 6.66E-03 | yellow | 0.99707 |        |
| <i>PKM2</i>        | NM_182470    | rs12883168 | 5.01E-03 | yellow | 0.58066 |        |
| <i>PLEKHA7</i>     | NM_175058    | rs4321183  | 9.42E-04 | yellow | 0.87637 |        |
| <i>PLS1</i>        | NM_002670    | rs358660   | 1.12E-02 | yellow | 0.97380 |        |
| <i>PLTP</i>        | NM_006227    | rs1979470  | 1.64E-02 | yellow | 0.88437 |        |
| <i>PODXL2</i>      | NM_015720    | rs11242001 | 6.85E-03 | yellow | 0.94131 |        |
| <i>PPP1R13B</i>    | NM_015316    | rs7543626  | 3.26E-04 | yellow | 0.85473 |        |
| <i>PPP1R1B</i>     | NM_181505    | rs8096947  | 2.56E-02 | yellow | 0.94222 |        |
| <i>PPP2R2B</i>     | NM_181676    | rs2272714  | 5.79E-03 | yellow | 0.90092 |        |
| <i>PPP2R2B</i>     | NM_181676    | rs2272714  | 5.79E-03 | yellow | 0.86443 |        |
| <i>PRG2</i>        | NM_024888    | NA         | NA       | yellow | 0.84548 |        |
| <i>PRODH</i>       | NM_016335    | rs13278771 | 1.55E-02 | yellow | 0.90419 |        |
| <i>PRPH</i>        | NM_006262    | rs12902281 | 1.29E-02 | yellow | 0.81378 |        |
| <i>PRRX1</i>       | NM_022716    | rs4131005  | 1.86E-03 | yellow | 0.76744 |        |
| <i>PSMC3IP</i>     | NM_016556    | rs4290385  | 3.28E-03 | yellow | 0.83482 |        |
| <i>PSRC1</i>       | NM_001005290 | rs7654972  | 1.09E-02 | yellow | 0.85442 |        |
| <i>PTGDS</i>       | NM_000954    | rs13405108 | 6.17E-03 | yellow | 0.97393 |        |
| <i>PTP4A3</i>      | NM_007079    | rs10935427 | 5.83E-03 | yellow | 0.93688 |        |
| <i>PTP4A3</i>      | NM_007079    | rs10935427 | 5.83E-03 | yellow | 0.86897 |        |
| <i>PTPRF</i>       | NM_130440    | rs1175222  | 9.94E-03 | yellow | 0.86507 |        |
| <i>PTPRO</i>       | NM_030670    | rs4416821  | 2.73E-03 | yellow | 0.83102 |        |
| <i>PTPRT</i>       | NM_133170    | rs3783167  | 2.13E-04 | yellow | 0.76729 |        |
| <i>RAFTLIN</i>     | NM_015150    | NA         | NA       | yellow | 0.94348 |        |
| <i>BBPMS</i>       | NM_001008712 | rs4422383  | 2.46E-03 | yellow | 0.79703 |        |
| <i>RDH10</i>       | NM_172037    | rs9894295  | 9.47E-04 | yellow | 0.75886 |        |
| <i>RFC4</i>        | NM_002916    | rs322407   | 2.11E-03 | yellow | 0.94242 |        |
| <i>RFC4</i>        | NM_002916    | rs322407   | 2.11E-03 | yellow | 0.90149 |        |
| <i>RFC5</i>        | NM_007370    | rs6703791  | 1.82E-02 | yellow | 0.88099 |        |
| <i>RGS17</i>       | NM_012419    | rs755763   | 2.95E-03 | yellow | 0.92150 |        |
| <i>RIPK2</i>       | NM_003821    | rs17015982 | 5.05E-03 | yellow | 0.72315 |        |
| <i>RND3</i>        | NM_005168    | rs1844895  | 1.48E-02 | yellow | 0.86584 |        |
| <i>RNF128</i>      | NM_194463    | NA         | NA       | yellow | 0.74921 |        |
| <i>RP11-19J3.3</i> | NM_001012267 | NA         | NA       | yellow | 0.70445 |        |
| <i>RPIP8</i>       | NM_006695    | NA         | NA       | yellow | 0.97271 |        |
| <i>RPL29</i>       | NM_000992    | rs1789597  | 2.94E-02 | yellow | 0.91034 |        |
| <i>RPL6</i>        | NM_001024662 | rs4627009  | 4.46E-03 | yellow | 0.86237 |        |
| <i>RPS7</i>        | NM_001011    | rs17636496 | 2.72E-02 | yellow | 0.84917 |        |
| <i>RRAGB</i>       | NM_006064    | NA         | NA       | yellow | 0.99039 |        |
| <i>RTN3</i>        | NM_201430    | rs2150031  | 6.09E-04 | yellow | 0.96064 |        |
| <i>RUVBL2</i>      | NM_006666    | rs11714003 | 1.47E-03 | yellow | 0.87819 |        |
| <i>SERPINH1</i>    | NM_001235    | rs4746136  | 1.80E-02 | yellow | 0.79507 |        |
| <i>SEZ6L2</i>      | NM_201575    | rs7640634  | 1.64E-02 | yellow | 0.92493 | autism |
| <i>SHC1</i>        | NM_003029    | rs2239466  | 2.27E-03 | yellow | 0.80506 |        |
| <i>SHMT1</i>       | NM_148918    | rs1178339  | 1.34E-04 | yellow | 0.93532 |        |
| <i>SLC11A2</i>     | NM_000617    | rs10257300 | 9.30E-03 | yellow | 0.93303 |        |
| <i>SLC16A6</i>     | NM_004694    | rs2244625  | 2.78E-03 | yellow | 0.64555 |        |
| <i>SLC1A5</i>      | NM_005628    | rs6499586  | 1.02E-02 | yellow | 0.78478 |        |
| <i>SLC23A2</i>     | NM_005116    | rs6712088  | 3.32E-03 | yellow | 0.68222 |        |

Supplementary Table 6

|                 |              |            |          |        |         |          |
|-----------------|--------------|------------|----------|--------|---------|----------|
| <i>SLC38A3</i>  | NM_006841    | rs739431   | 8.66E-04 | yellow | 0.85704 |          |
| <i>SLC39A12</i> | NM_152725    | rs7788359  | 5.73E-03 | yellow | 0.85639 |          |
| <i>SLC44A3</i>  | NM_152369    | rs4379388  | 1.23E-03 | yellow | 0.96196 |          |
| <i>SLC5A6</i>   | NM_021095    | rs11564037 | 7.57E-03 | yellow | 0.93200 |          |
| <i>SLC6A1</i>   | NM_003042    | rs985157   | 3.11E-03 | yellow | 0.81542 |          |
| <i>SLD5</i>     | NM_032336    | NA         | NA       | yellow | 0.75517 |          |
| <i>SLITL2</i>   | NM_138440    | NA         | NA       | yellow | 0.96856 |          |
| <i>SMS</i>      | NM_004595    | NA         | NA       | yellow | 0.97045 |          |
| <i>SNAI2</i>    | NM_003068    | rs4793772  | 2.21E-02 | yellow | 0.80846 |          |
| <i>SNN</i>      | NM_003498    | rs17221495 | 1.68E-02 | yellow | 0.66908 |          |
| <i>SNRK</i>     | NM_017719    | rs6073692  | 5.17E-03 | yellow | 0.79750 |          |
| <i>SNTA1</i>    | NM_003098    | rs1278947  | 2.95E-02 | yellow | 0.95661 |          |
| <i>SPOCK2</i>   | NM_014767    | rs3780610  | 2.24E-02 | yellow | 0.89562 |          |
| <i>SRC</i>      | NM_005417    | rs2834772  | 4.08E-03 | yellow | 0.83167 |          |
| <i>SRM</i>      | NM_003132    | rs7194545  | 5.96E-03 | yellow | 0.77807 |          |
| <i>SRPX</i>     | NM_006307    | NA         | NA       | yellow | 0.90987 |          |
| <i>SSBP3</i>    | NM_145716    | rs2126756  | 7.34E-03 | yellow | 0.75918 |          |
| <i>STC2</i>     | NM_003714    | rs17726121 | 6.87E-03 | yellow | 0.90706 |          |
| <i>SUV39H1</i>  | NM_003173    | NA         | NA       | yellow | 0.77285 |          |
| <i>SYN1</i>     | NM_006950    | NA         | NA       | yellow | 0.82835 | epilepsy |
| <i>TBRG4</i>    | NM_004749    | rs6775113  | 4.72E-03 | yellow | 0.63005 |          |
| <i>TBRG4</i>    | NM_030900    | rs6775113  | 4.72E-03 | yellow | 0.90861 |          |
| <i>TBX2</i>     | NM_005994    | rs2968217  | 2.91E-03 | yellow | 0.79205 |          |
| <i>THOP1</i>    | NM_003249    | rs4765996  | 2.33E-03 | yellow | 0.84624 |          |
| <i>TIMP4</i>    | NM_003256    | rs2438583  | 2.47E-02 | yellow | 0.80103 |          |
| <i>TLE2</i>     | NM_003260    | rs8078781  | 1.59E-04 | yellow | 0.95116 |          |
| <i>TMEM108</i>  | NM_023943    | rs10093875 | 1.13E-03 | yellow | 0.73267 |          |
| <i>TRIM47</i>   | NM_033452    | rs1967880  | 2.43E-02 | yellow | 0.86358 |          |
| <i>TTYH2</i>    | NM_052869    | rs10784893 | 1.04E-02 | yellow | 0.86872 |          |
| <i>TUBG1</i>    | NM_001070    | rs4290385  | 3.28E-03 | yellow | 0.98632 |          |
| <i>TUBG1</i>    | NM_001070    | rs4290385  | 3.28E-03 | yellow | 0.86444 |          |
| <i>TXNDC5</i>   | NM_022085    | NA         | NA       | yellow | 0.90540 |          |
| <i>UCP2</i>     | NM_003355    | rs1328855  | 5.23E-03 | yellow | 0.79964 |          |
| <i>VARS</i>     | NM_006295    | rs1951688  | 5.61E-03 | yellow | 0.78475 |          |
| <i>VASH1</i>    | NM_014909    | rs308927   | 6.64E-03 | yellow | 0.95108 | autism   |
| <i>VSNL1</i>    | NM_003385    | rs4504735  | 1.34E-03 | yellow | 0.77687 |          |
| <i>WDFY2</i>    | NM_052950    | rs1261117  | 4.60E-03 | yellow | 0.92541 |          |
| <i>WDR34</i>    | NM_052844    | rs6486676  | 1.41E-03 | yellow | 0.72632 |          |
| <i>WNT7A</i>    | NM_004625    | rs4757211  | 2.21E-03 | yellow | 0.63803 |          |
| <i>YPEL4</i>    | NM_145008    | rs950844   | 1.89E-02 | yellow | 0.86005 |          |
| <i>ZDHHC16</i>  | NM_032327    | rs1441383  | 3.46E-03 | yellow | 0.84710 |          |
| <i>ZFP37</i>    | NM_003408    | rs987694   | 1.13E-03 | yellow | 0.89434 |          |
| <i>ZNF177</i>   | NM_003451    | rs2168856  | 1.27E-02 | yellow | 0.91226 |          |
| <i>ZNF274</i>   | NM_016324    | rs7145302  | 2.64E-02 | yellow | 0.79652 |          |
| <i>ZNF447</i>   | NM_023926    | NA         | NA       | yellow | 0.93013 |          |
| <i>ZNF484</i>   | NM_031486    | rs10992489 | 5.27E-03 | yellow | 0.79262 |          |
| <i>ZNF545</i>   | NM_133466    | NA         | NA       | yellow | 0.82785 |          |
| <i>ZNF573</i>   | NM_152360    | rs7558605  | 1.43E-02 | yellow | 0.80801 |          |
| <i>ZNF706</i>   | NM_001042511 | rs7306825  | 1.60E-03 | yellow | 0.83390 |          |



Supplementary Table 6

|               |           |           |          |        |         |
|---------------|-----------|-----------|----------|--------|---------|
| <i>ZNF706</i> | NM_016096 | rs7306825 | 1.60E-03 | yellow | 0.90069 |
| <i>ZWILCH</i> | NR_003105 | rs8052896 | 8.45E-03 | yellow | 0.91128 |

**Supplementary Table 7****Gene ontology of ASD-related modules****Black Module**

| <b>Category</b> | <b>Term</b>                                                                                          | <b>Pvalue</b> |
|-----------------|------------------------------------------------------------------------------------------------------|---------------|
| GOTERM_BP_ALL   | GO:0002504~antigen processing and presentation of peptide or polysaccharide antigen via MHC class II | 2.61E-08      |
| GOTERM_BP_ALL   | GO:0007242~intracellular signaling cascade                                                           | 6.18E-08      |
| GOTERM_MF_ALL   | GO:0005515~protein binding                                                                           | 2.13E-07      |
| GOTERM_BP_ALL   | GO:0009966~regulation of signal transduction                                                         | 4.53E-07      |
| GOTERM_BP_ALL   | GO:0010646~regulation of cell communication                                                          | 7.00E-07      |
| GOTERM_BP_ALL   | GO:0042325~regulation of phosphorylation                                                             | 1.03E-06      |
| GOTERM_BP_ALL   | GO:0043549~regulation of kinase activity                                                             | 1.68E-06      |
| GOTERM_MF_ALL   | GO:0032395~MHC class II receptor activity                                                            | 1.85E-06      |
| GOTERM_CC_ALL   | GO:0044459~plasma membrane part                                                                      | 2.11E-06      |
| GOTERM_BP_ALL   | GO:0051174~regulation of phosphorus metabolic process                                                | 2.11E-06      |
| GOTERM_BP_ALL   | GO:0019220~regulation of phosphate metabolic process                                                 | 2.11E-06      |
| GOTERM_CC_ALL   | GO:0042613~MHC class II protein complex                                                              | 3.00E-06      |
| GOTERM_BP_ALL   | GO:0051338~regulation of transferase activity                                                        | 3.29E-06      |
| GOTERM_BP_ALL   | GO:0045859~regulation of protein kinase activity                                                     | 3.51E-06      |
| GOTERM_BP_ALL   | GO:0043407~negative regulation of MAP kinase activity                                                | 5.07E-06      |
| GOTERM_BP_ALL   | GO:0006469~negative regulation of protein kinase activity                                            | 7.11E-06      |
| KEGG_PATHWAY    | hsa04672:Intestinal immune network for IgA production                                                | 7.15E-06      |
| GOTERM_BP_ALL   | GO:0007243~protein kinase cascade                                                                    | 8.45E-06      |
| GOTERM_BP_ALL   | GO:0033673~negative regulation of kinase activity                                                    | 9.66E-06      |
| GOTERM_BP_ALL   | GO:0000165~MAPKKK cascade                                                                            | 1.15E-05      |
| GOTERM_BP_ALL   | GO:0048869~cellular developmental process                                                            | 1.17E-05      |
| GOTERM_BP_ALL   | GO:0030154~cell differentiation                                                                      | 1.51E-05      |
| GOTERM_BP_ALL   | GO:0051348~negative regulation of transferase activity                                               | 1.72E-05      |
| GOTERM_MF_ALL   | GO:0019887~protein kinase regulator activity                                                         | 2.09E-05      |
| GOTERM_BP_ALL   | GO:0006796~phosphate metabolic process                                                               | 2.53E-05      |
| GOTERM_BP_ALL   | GO:0006793~phosphorus metabolic process                                                              | 2.53E-05      |
| GOTERM_MF_ALL   | GO:0019900~kinase binding                                                                            | 4.05E-05      |
| KEGG_PATHWAY    | hsa04010:MAPK signaling pathway                                                                      | 4.13E-05      |
| GOTERM_BP_ALL   | GO:0048731~system development                                                                        | 4.18E-05      |

Supplementary Table 7

|                                |                                                                                              |          |
|--------------------------------|----------------------------------------------------------------------------------------------|----------|
| GENETIC_ASSOCIATION_DB_DISEASE | measles                                                                                      | 4.92E-05 |
| GOTERM_BP_ALL                  | GO:0048856~anatomical structure development                                                  | 5.22E-05 |
| GOTERM_MF_ALL                  | GO:0004860~protein kinase inhibitor activity                                                 | 5.92E-05 |
| GOTERM_MF_ALL                  | GO:0019207~kinase regulator activity                                                         | 6.50E-05 |
| GOTERM_MF_ALL                  | GO:0019210~kinase inhibitor activity                                                         | 6.95E-05 |
| GOTERM_MF_ALL                  | GO:0004672~protein kinase activity                                                           | 7.15E-05 |
| GOTERM_BP_ALL                  | GO:0048519~negative regulation of biological process                                         | 7.80E-05 |
| GOTERM_BP_ALL                  | GO:0043405~regulation of MAP kinase activity                                                 | 8.08E-05 |
| GOTERM_BP_ALL                  | GO:0044092~negative regulation of molecular function                                         | 8.41E-05 |
| GOTERM_BP_ALL                  | GO:0048518~positive regulation of biological process                                         | 8.70E-05 |
| GOTERM_MF_ALL                  | GO:0016301~kinase activity                                                                   | 9.02E-05 |
| GOTERM_BP_ALL                  | GO:0048468~cell development                                                                  | 1.08E-04 |
| GOTERM_MF_ALL                  | GO:0019901~protein kinase binding                                                            | 1.19E-04 |
| GOTERM_BP_ALL                  | GO:0007165~signal transduction                                                               | 1.28E-04 |
| GOTERM_BP_ALL                  | GO:0048522~positive regulation of cellular process                                           | 1.37E-04 |
| GOTERM_BP_ALL                  | GO:0045785~positive regulation of cell adhesion                                              | 1.41E-04 |
| GOTERM_BP_ALL                  | GO:0006468~protein amino acid phosphorylation                                                | 1.63E-04 |
| GOTERM_BP_ALL                  | GO:0016043~cellular component organization                                                   | 1.64E-04 |
| GOTERM_BP_ALL                  | GO:0009653~anatomical structure morphogenesis                                                | 1.66E-04 |
| GOTERM_CC_ALL                  | GO:0005886~plasma membrane                                                                   | 1.77E-04 |
| GOTERM_BP_ALL                  | GO:0019882~antigen processing and presentation                                               | 1.94E-04 |
| GOTERM_BP_ALL                  | GO:0042326~negative regulation of phosphorylation                                            | 1.96E-04 |
| GOTERM_MF_ALL                  | GO:0016772~transferase activity, transferring phosphorus-containing groups                   | 2.15E-04 |
| GOTERM_BP_ALL                  | GO:0048514~blood vessel morphogenesis                                                        | 2.21E-04 |
| GENETIC_ASSOCIATION_DB_DISEASE | bipolar disorder                                                                             | 2.50E-04 |
| GOTERM_BP_ALL                  | GO:0010563~negative regulation of phosphorus metabolic process                               | 2.84E-04 |
| GOTERM_BP_ALL                  | GO:0045936~negative regulation of phosphate metabolic process                                | 2.84E-04 |
| GOTERM_BP_ALL                  | GO:0001666~response to hypoxia                                                               | 2.91E-04 |
| KEGG_PATHWAY                   | hsa05310:Asthma                                                                              | 2.95E-04 |
| GOTERM_BP_ALL                  | GO:0032502~developmental process                                                             | 2.98E-04 |
| KEGG_PATHWAY                   | hsa04612:Antigen processing and presentation                                                 | 3.36E-04 |
| KEGG_PATHWAY                   | hsa05410:Hypertrophic cardiomyopathy (HCM)                                                   | 3.36E-04 |
| GOTERM_BP_ALL                  | GO:0042221~response to chemical stimulus                                                     | 3.37E-04 |
| GOTERM_BP_ALL                  | GO:0019886~antigen processing and presentation of exogenous peptide antigen via MHC class II | 3.81E-04 |
| GOTERM_BP_ALL                  | GO:0002495~antigen processing and presentation of peptide antigen via MHC class II           | 3.81E-04 |

Supplementary Table 7

|                                |                                                                             |          |
|--------------------------------|-----------------------------------------------------------------------------|----------|
| GOTERM_BP_ALL                  | GO:0070482~response to oxygen levels                                        | 4.14E-04 |
| GOTERM_BP_ALL                  | GO:0051239~regulation of multicellular organismal process                   | 4.35E-04 |
| GOTERM_BP_ALL                  | GO:0007275~multicellular organismal development                             | 4.69E-04 |
| GOTERM_MF_ALL                  | GO:0016773~phosphotransferase activity, alcohol group as acceptor           | 4.76E-04 |
| GOTERM_CC_ALL                  | GO:0044464~cell part                                                        | 5.08E-04 |
| GOTERM_CC_ALL                  | GO:0005623~cell                                                             | 5.15E-04 |
| KEGG_PATHWAY                   | hsa05416:Viral myocarditis                                                  | 5.18E-04 |
| GOTERM_BP_ALL                  | GO:0048583~regulation of response to stimulus                               | 5.58E-04 |
| GOTERM_BP_ALL                  | GO:0050732~negative regulation of peptidyl-tyrosine phosphorylation         | 5.63E-04 |
| GOTERM_CC_ALL                  | GO:0042611~MHC protein complex                                              | 6.10E-04 |
| GOTERM_BP_ALL                  | GO:0007154~cell communication                                               | 6.16E-04 |
| GOTERM_MF_ALL                  | GO:0005488~binding                                                          | 6.71E-04 |
| GOTERM_BP_ALL                  | GO:0048585~negative regulation of response to stimulus                      | 6.93E-04 |
| GOTERM_CC_ALL                  | GO:0030054~cell junction                                                    | 7.17E-04 |
| GOTERM_MF_ALL                  | GO:0005102~receptor binding                                                 | 7.26E-04 |
| KEGG_PATHWAY                   | hsa05330:Allograft rejection                                                | 7.52E-04 |
| GOTERM_BP_ALL                  | GO:0065009~regulation of molecular function                                 | 7.78E-04 |
| GOTERM_BP_ALL                  | GO:0001568~blood vessel development                                         | 9.30E-04 |
| GOTERM_BP_ALL                  | GO:0043086~negative regulation of catalytic activity                        | 9.75E-04 |
| GOTERM_BP_ALL                  | GO:0016310~phosphorylation                                                  | 9.81E-04 |
| GOTERM_BP_ALL                  | GO:0048513~organ development                                                | 1.03E-03 |
| GENETIC_ASSOCIATION_DB_DISEASE | leukemia                                                                    | 1.04E-03 |
| GOTERM_MF_ALL                  | GO:0019899~enzyme binding                                                   | 1.05E-03 |
| GOTERM_BP_ALL                  | GO:0002478~antigen processing and presentation of exogenous peptide antigen | 1.08E-03 |
| GOTERM_MF_ALL                  | GO:0008092~cytoskeletal protein binding                                     | 1.11E-03 |
| KEGG_PATHWAY                   | hsa05332:Graft-versus-host disease                                          | 1.12E-03 |
| GOTERM_BP_ALL                  | GO:0048699~generation of neurons                                            | 1.14E-03 |
| GOTERM_BP_ALL                  | GO:0048523~negative regulation of cellular process                          | 1.15E-03 |
| GOTERM_BP_ALL                  | GO:0001944~vasculature development                                          | 1.17E-03 |
| GOTERM_MF_ALL                  | GO:0004674~protein serine/threonine kinase activity                         | 1.22E-03 |
| GOTERM_BP_ALL                  | GO:0022008~neurogenesis                                                     | 1.24E-03 |
| GOTERM_CC_ALL                  | GO:0048471~perinuclear region of cytoplasm                                  | 1.25E-03 |
| GOTERM_BP_ALL                  | GO:0042594~response to starvation                                           | 1.28E-03 |
| GENETIC_ASSOCIATION_DB_DISEASE | infection, post allograft                                                   | 1.29E-03 |
| GENETIC_ASSOCIATION_DB_DISEASE | berylliosis                                                                 | 1.29E-03 |

Supplementary Table 7

|                                |                                                                      |          |
|--------------------------------|----------------------------------------------------------------------|----------|
| GOTERM_CC_ALL                  | GO:0031252~cell leading edge                                         | 1.34E-03 |
| GOTERM_BP_ALL                  | GO:0022607~cellular component assembly                               | 1.42E-03 |
| GOTERM_BP_ALL                  | GO:0043412~biopolymer modification                                   | 1.43E-03 |
| GOTERM_BP_ALL                  | GO:0050790~regulation of catalytic activity                          | 1.45E-03 |
| GOTERM_BP_ALL                  | GO:0031100~organ regeneration                                        | 1.50E-03 |
| GOTERM_BP_ALL                  | GO:0032879~regulation of localization                                | 1.50E-03 |
| GOTERM_MF_ALL                  | GO:0030234~enzyme regulator activity                                 | 1.58E-03 |
| GOTERM_BP_ALL                  | GO:0031669~cellular response to nutrient levels                      | 1.58E-03 |
| GOTERM_BP_ALL                  | GO:0050794~regulation of cellular process                            | 1.58E-03 |
| KEGG_PATHWAY                   | hsa04940:Type I diabetes mellitus                                    | 1.60E-03 |
| KEGG_PATHWAY                   | hsa05200:Pathways in cancer                                          | 1.66E-03 |
| GOTERM_BP_ALL                  | GO:0009967~positive regulation of signal transduction                | 1.73E-03 |
| GOTERM_BP_ALL                  | GO:0010647~positive regulation of cell communication                 | 1.80E-03 |
| GOTERM_BP_ALL                  | GO:0050789~regulation of biological process                          | 1.85E-03 |
| KEGG_PATHWAY                   | hsa04144:Endocytosis                                                 | 1.86E-03 |
| GOTERM_BP_ALL                  | GO:0030182~neuron differentiation                                    | 2.04E-03 |
| GOTERM_BP_ALL                  | GO:0006950~response to stress                                        | 2.06E-03 |
| GOTERM_BP_ALL                  | GO:0031099~regeneration                                              | 2.22E-03 |
| GOTERM_BP_ALL                  | GO:0019884~antigen processing and presentation of exogenous antigen  | 2.27E-03 |
| GOTERM_BP_ALL                  | GO:0006928~cell motion                                               | 2.29E-03 |
| GOTERM_BP_ALL                  | GO:0050896~response to stimulus                                      | 2.41E-03 |
| GOTERM_BP_ALL                  | GO:0042127~regulation of cell proliferation                          | 2.53E-03 |
| GOTERM_BP_ALL                  | GO:0043687~post-translational protein modification                   | 2.70E-03 |
| GENETIC_ASSOCIATION_DB_DISEASE | cardiomyopathy                                                       | 2.73E-03 |
| GOTERM_CC_ALL                  | GO:0005625~soluble fraction                                          | 2.75E-03 |
| GOTERM_BP_ALL                  | GO:0046627~negative regulation of insulin receptor signaling pathway | 2.80E-03 |
| GOTERM_CC_ALL                  | GO:0005912~adherens junction                                         | 2.87E-03 |
| GOTERM_BP_ALL                  | GO:0001933~negative regulation of protein amino acid phosphorylation | 2.93E-03 |
| GOTERM_BP_ALL                  | GO:0007399~nervous system development                                | 3.14E-03 |
| GENETIC_ASSOCIATION_DB_DISEASE | antiphospholipid syndrome                                            | 3.19E-03 |
| GOTERM_CC_ALL                  | GO:0009898~internal side of plasma membrane                          | 3.19E-03 |
| GOTERM_BP_ALL                  | GO:0009267~cellular response to starvation                           | 3.30E-03 |
| KEGG_PATHWAY                   | hsa04510:Focal adhesion                                              | 3.34E-03 |
| GOTERM_CC_ALL                  | GO:0042995~cell projection                                           | 3.37E-03 |
| GOTERM_BP_ALL                  | GO:0035295~tube development                                          | 3.56E-03 |

Supplementary Table 7

|                                |                                                                             |          |
|--------------------------------|-----------------------------------------------------------------------------|----------|
| GOTERM_BP_ALL                  | GO:0070271~protein complex biogenesis                                       | 3.69E-03 |
| GOTERM_BP_ALL                  | GO:0006461~protein complex assembly                                         | 3.69E-03 |
| GOTERM_BP_ALL                  | GO:0043067~regulation of programmed cell death                              | 3.77E-03 |
| GOTERM_BP_ALL                  | GO:0007169~transmembrane receptor protein tyrosine kinase signaling pathway | 3.80E-03 |
| GOTERM_BP_ALL                  | GO:0010941~regulation of cell death                                         | 3.90E-03 |
| GENETIC_ASSOCIATION_DB_DISEASE | hepatosplenic schistosomiasis japonica                                      | 3.91E-03 |
| KEGG_PATHWAY                   | hsa05320:Autoimmune thyroid disease                                         | 3.98E-03 |
| GOTERM_MF_ALL                  | GO:0030291~protein serine/threonine kinase inhibitor activity               | 3.98E-03 |
| GENETIC_ASSOCIATION_DB_DISEASE | hepatocellular carcinoma                                                    | 4.06E-03 |
| GOTERM_MF_ALL                  | GO:0004713~protein tyrosine kinase activity                                 | 4.11E-03 |
| GOTERM_BP_ALL                  | GO:0065007~biological regulation                                            | 4.14E-03 |
| GOTERM_CC_ALL                  | GO:0005924~cell-substrate adherens junction                                 | 4.33E-03 |
| GOTERM_BP_ALL                  | GO:0008285~negative regulation of cell proliferation                        | 4.37E-03 |
| GOTERM_BP_ALL                  | GO:0044085~cellular component biogenesis                                    | 4.53E-03 |
| GOTERM_BP_ALL                  | GO:0009987~cellular process                                                 | 4.54E-03 |
| GOTERM_BP_ALL                  | GO:0002376~immune system process                                            | 4.57E-03 |
| KEGG_PATHWAY                   | hsa05412:Arrhythmogenic right ventricular cardiomyopathy (ARVC)             | 4.85E-03 |
| GOTERM_BP_ALL                  | GO:0030155~regulation of cell adhesion                                      | 4.93E-03 |
| GOTERM_BP_ALL                  | GO:0050793~regulation of developmental process                              | 4.98E-03 |
| GOTERM_MF_ALL                  | GO:0032555~purine ribonucleotide binding                                    | 4.99E-03 |
| GOTERM_MF_ALL                  | GO:0032553~ribonucleotide binding                                           | 4.99E-03 |
| GOTERM_BP_ALL                  | GO:0006464~protein modification process                                     | 5.18E-03 |
| GOTERM_BP_ALL                  | GO:0009628~response to abiotic stimulus                                     | 5.23E-03 |
| GOTERM_BP_ALL                  | GO:0033554~cellular response to stress                                      | 5.23E-03 |
| GOTERM_BP_ALL                  | GO:0046626~regulation of insulin receptor signaling pathway                 | 5.63E-03 |
| GOTERM_BP_ALL                  | GO:0048584~positive regulation of response to stimulus                      | 5.67E-03 |
| GOTERM_BP_ALL                  | GO:0007267~cell-cell signaling                                              | 5.73E-03 |
| GOTERM_CC_ALL                  | GO:0070161~anchoring junction                                               | 5.76E-03 |
| GOTERM_CC_ALL                  | GO:0030055~cell-substrate junction                                          | 5.87E-03 |
| GOTERM_BP_ALL                  | GO:0044057~regulation of system process                                     | 6.05E-03 |
| GOTERM_BP_ALL                  | GO:0007167~enzyme linked receptor protein signaling pathway                 | 6.09E-03 |
| GOTERM_BP_ALL                  | GO:0048666~neuron development                                               | 6.09E-03 |
| GOTERM_BP_ALL                  | GO:0042981~regulation of apoptosis                                          | 6.29E-03 |
| GENETIC_ASSOCIATION_DB_DISEASE | scleroderma; jaundice                                                       | 6.41E-03 |
| GOTERM_BP_ALL                  | GO:0000188~inactivation of MAPK activity                                    | 6.53E-03 |

Supplementary Table 7

|                                |                                                                     |          |
|--------------------------------|---------------------------------------------------------------------|----------|
| GOTERM_MF_ALL                  | GO:0022843~voltage-gated cation channel activity                    | 6.65E-03 |
| GOTERM_CC_ALL                  | GO:0045121~membrane raft                                            | 6.78E-03 |
| GOTERM_BP_ALL                  | GO:0051674~localization of cell                                     | 7.05E-03 |
| GOTERM_BP_ALL                  | GO:0048870~cell motility                                            | 7.05E-03 |
| GOTERM_BP_ALL                  | GO:0007010~cytoskeleton organization                                | 7.11E-03 |
| GOTERM_BP_ALL                  | GO:0002682~regulation of immune system process                      | 7.14E-03 |
| GOTERM_BP_ALL                  | GO:0051716~cellular response to stimulus                            | 7.22E-03 |
| GOTERM_BP_ALL                  | GO:0001570~vasculogenesis                                           | 7.43E-03 |
| GOTERM_BP_ALL                  | GO:0045059~positive thymic T cell selection                         | 7.45E-03 |
| KEGG_PATHWAY                   | hsa05221:Acute myeloid leukemia                                     | 7.61E-03 |
| GOTERM_BP_ALL                  | GO:0048646~anatomical structure formation involved in morphogenesis | 7.66E-03 |
| GOTERM_BP_ALL                  | GO:0016477~cell migration                                           | 7.77E-03 |
| GOTERM_BP_ALL                  | GO:0001525~angiogenesis                                             | 7.83E-03 |
| GOTERM_BP_ALL                  | GO:0031668~cellular response to extracellular stimulus              | 8.09E-03 |
| GOTERM_BP_ALL                  | GO:0009888~tissue development                                       | 8.13E-03 |
| GOTERM_CC_ALL                  | GO:0001726~ruffle                                                   | 8.48E-03 |
| GOTERM_MF_ALL                  | GO:0008047~enzyme activator activity                                | 8.66E-03 |
| GOTERM_BP_ALL                  | GO:0043065~positive regulation of apoptosis                         | 8.71E-03 |
| GOTERM_BP_ALL                  | GO:0040011~locomotion                                               | 9.01E-03 |
| KEGG_PATHWAY                   | hsa05222:Small cell lung cancer                                     | 9.02E-03 |
| GOTERM_CC_ALL                  | GO:0005737~cytoplasm                                                | 9.12E-03 |
| GOTERM_BP_ALL                  | GO:0043068~positive regulation of programmed cell death             | 9.22E-03 |
| GENETIC_ASSOCIATION_DB_DISEASE | cirrhosis, primary biliary                                          | 9.45E-03 |
| GENETIC_ASSOCIATION_DB_DISEASE | cytokine resposne                                                   | 9.45E-03 |
| GENETIC_ASSOCIATION_DB_DISEASE | Plasmodium falciparum infection                                     | 9.45E-03 |
| GENETIC_ASSOCIATION_DB_DISEASE | leishmaniasis                                                       | 9.45E-03 |
| GENETIC_ASSOCIATION_DB_DISEASE | mediterranean visceral leishmaniasis                                | 9.45E-03 |
| GOTERM_BP_ALL                  | GO:0010942~positive regulation of cell death                        | 9.65E-03 |
| GENETIC_ASSOCIATION_DB_DISEASE | retinopathy, diabetic                                               | 9.92E-03 |
| GOTERM_BP_ALL                  | GO:0001822~kidney development                                       | 1.06E-02 |
| GOTERM_MF_ALL                  | GO:0017076~purine nucleotide binding                                | 1.14E-02 |
| GOTERM_BP_ALL                  | GO:0010033~response to organic substance                            | 1.14E-02 |
| GOTERM_BP_ALL                  | GO:0030030~cell projection organization                             | 1.16E-02 |
| GOTERM_BP_ALL                  | GO:0048511~rhythmic process                                         | 1.17E-02 |
| KEGG_PATHWAY                   | hsa05414:Dilated cardiomyopathy                                     | 1.19E-02 |

Supplementary Table 7

|                                |                                                                   |          |
|--------------------------------|-------------------------------------------------------------------|----------|
| GOTERM_MF_ALL                  | GO:0032947~protein complex scaffold                               | 1.20E-02 |
| GOTERM_MF_ALL                  | GO:0050998~nitric-oxide synthase binding                          | 1.23E-02 |
| GENETIC_ASSOCIATION_DB_DISEASE | endometriosis                                                     | 1.24E-02 |
| GOTERM_BP_ALL                  | GO:0043368~positive T cell selection                              | 1.24E-02 |
| GOTERM_BP_ALL                  | GO:0045597~positive regulation of cell differentiation            | 1.25E-02 |
| GOTERM_BP_ALL                  | GO:0045595~regulation of cell differentiation                     | 1.26E-02 |
| GOTERM_MF_ALL                  | GO:0005070~SH3/SH2 adaptor activity                               | 1.37E-02 |
| GOTERM_CC_ALL                  | GO:0005925~focal adhesion                                         | 1.38E-02 |
| GOTERM_CC_ALL                  | GO:0043005~neuron projection                                      | 1.38E-02 |
| KEGG_PATHWAY                   | hsa05322:Systemic lupus erythematosus                             | 1.39E-02 |
| GOTERM_BP_ALL                  | GO:0033674~positive regulation of kinase activity                 | 1.40E-02 |
| GOTERM_BP_ALL                  | GO:0008284~positive regulation of cell proliferation              | 1.43E-02 |
| GENETIC_ASSOCIATION_DB_DISEASE | nasopharyngeal cancer                                             | 1.48E-02 |
| GOTERM_CC_ALL                  | GO:0031226~intrinsic to plasma membrane                           | 1.48E-02 |
| GOTERM_BP_ALL                  | GO:0065003~macromolecular complex assembly                        | 1.49E-02 |
| GOTERM_BP_ALL                  | GO:0031667~response to nutrient levels                            | 1.52E-02 |
| GOTERM_BP_ALL                  | GO:0051051~negative regulation of transport                       | 1.54E-02 |
| GOTERM_BP_ALL                  | GO:0048732~gland development                                      | 1.54E-02 |
| GOTERM_BP_ALL                  | GO:0030029~actin filament-based process                           | 1.61E-02 |
| GOTERM_BP_ALL                  | GO:0001932~regulation of protein amino acid phosphorylation       | 1.61E-02 |
| GOTERM_BP_ALL                  | GO:0043933~macromolecular complex subunit organization            | 1.62E-02 |
| GOTERM_BP_ALL                  | GO:0030097~hemopoiesis                                            | 1.67E-02 |
| GOTERM_BP_ALL                  | GO:0007610~behavior                                               | 1.67E-02 |
| GOTERM_BP_ALL                  | GO:0048002~antigen processing and presentation of peptide antigen | 1.67E-02 |
| GOTERM_BP_ALL                  | GO:0009893~positive regulation of metabolic process               | 1.70E-02 |
| GOTERM_MF_ALL                  | GO:0003779~actin binding                                          | 1.70E-02 |
| GOTERM_BP_ALL                  | GO:0045580~regulation of T cell differentiation                   | 1.72E-02 |
| GOTERM_BP_ALL                  | GO:0030705~cytoskeleton-dependent intracellular transport         | 1.72E-02 |
| GOTERM_BP_ALL                  | GO:0007166~cell surface receptor linked signal transduction       | 1.73E-02 |
| GENETIC_ASSOCIATION_DB_DISEASE | celiac disease                                                    | 1.78E-02 |
| GOTERM_BP_ALL                  | GO:0051347~positive regulation of transferase activity            | 1.79E-02 |
| GOTERM_CC_ALL                  | GO:0005887~integral to plasma membrane                            | 1.83E-02 |
| GOTERM_BP_ALL                  | GO:0044093~positive regulation of molecular function              | 1.84E-02 |
| GOTERM_BP_ALL                  | GO:0045768~positive regulation of anti-apoptosis                  | 1.84E-02 |
| GOTERM_BP_ALL                  | GO:0022409~positive regulation of cell-cell adhesion              | 1.85E-02 |



Supplementary Table 7

|                                |                                                                                  |          |
|--------------------------------|----------------------------------------------------------------------------------|----------|
| GOTERM_BP_ALL                  | GO:0002520~immune system development                                             | 1.86E-02 |
| GOTERM_BP_ALL                  | GO:0001655~urogenital system development                                         | 1.98E-02 |
| GOTERM_BP_ALL                  | GO:0007568~aging                                                                 | 1.98E-02 |
| KEGG_PATHWAY                   | hsa04514:Cell adhesion molecules (CAMs)                                          | 2.01E-02 |
| GOTERM_BP_ALL                  | GO:0000904~cell morphogenesis involved in differentiation                        | 2.03E-02 |
| GOTERM_BP_ALL                  | GO:0006917~induction of apoptosis                                                | 2.04E-02 |
| GOTERM_BP_ALL                  | GO:0051049~regulation of transport                                               | 2.04E-02 |
| GOTERM_BP_ALL                  | GO:0007611~learning or memory                                                    | 2.06E-02 |
| GOTERM_BP_ALL                  | GO:0000902~cell morphogenesis                                                    | 2.07E-02 |
| GOTERM_BP_ALL                  | GO:0012502~induction of programmed cell death                                    | 2.08E-02 |
| GOTERM_BP_ALL                  | GO:0032989~cellular component morphogenesis                                      | 2.12E-02 |
| GOTERM_BP_ALL                  | GO:0006955~immune response                                                       | 2.12E-02 |
| GOTERM_CC_ALL                  | GO:0032587~ruffle membrane                                                       | 2.18E-02 |
| GOTERM_BP_ALL                  | GO:0031116~positive regulation of microtubule polymerization                     | 2.20E-02 |
| GOTERM_BP_ALL                  | GO:0008354~germ cell migration                                                   | 2.20E-02 |
| GOTERM_BP_ALL                  | GO:0045596~negative regulation of cell differentiation                           | 2.20E-02 |
| GOTERM_BP_ALL                  | GO:0043085~positive regulation of catalytic activity                             | 2.29E-02 |
| GOTERM_MF_ALL                  | GO:0005524~ATP binding                                                           | 2.32E-02 |
| GOTERM_BP_ALL                  | GO:0051249~regulation of lymphocyte activation                                   | 2.35E-02 |
| GOTERM_MF_ALL                  | GO:0000166~nucleotide binding                                                    | 2.37E-02 |
| GOTERM_BP_ALL                  | GO:0001936~regulation of endothelial cell proliferation                          | 2.39E-02 |
| GOTERM_BP_ALL                  | GO:0009887~organ morphogenesis                                                   | 2.40E-02 |
| GENETIC_ASSOCIATION_DB_DISEASE | autism                                                                           | 2.45E-02 |
| GOTERM_BP_ALL                  | GO:0042493~response to drug                                                      | 2.45E-02 |
| GENETIC_ASSOCIATION_DB_DISEASE | Crohn's disease ulcerative colitis                                               | 2.46E-02 |
| GOTERM_BP_ALL                  | GO:0006996~organelle organization                                                | 2.47E-02 |
| GOTERM_BP_ALL                  | GO:0050863~regulation of T cell activation                                       | 2.50E-02 |
| GOTERM_BP_ALL                  | GO:0016311~dephosphorylation                                                     | 2.51E-02 |
| GOTERM_BP_ALL                  | GO:0000278~mitotic cell cycle                                                    | 2.51E-02 |
| GOTERM_MF_ALL                  | GO:0033549~MAP kinase phosphatase activity                                       | 2.52E-02 |
| GOTERM_MF_ALL                  | GO:0017017~MAP kinase tyrosine/serine/threonine phosphatase activity             | 2.52E-02 |
| GOTERM_MF_ALL                  | GO:0004857~enzyme inhibitor activity                                             | 2.56E-02 |
| GOTERM_BP_ALL                  | GO:0031112~positive regulation of microtubule polymerization or depolymerization | 2.56E-02 |
| GOTERM_BP_ALL                  | GO:0031113~regulation of microtubule polymerization                              | 2.56E-02 |
| GOTERM_BP_ALL                  | GO:0045061~thymic T cell selection                                               | 2.56E-02 |

Supplementary Table 7

|                                |                                                              |          |
|--------------------------------|--------------------------------------------------------------|----------|
| GOTERM_CC_ALL                  | GO:0005622~intracellular                                     | 2.58E-02 |
| GOTERM_BP_ALL                  | GO:0007067~mitosis                                           | 2.59E-02 |
| GOTERM_BP_ALL                  | GO:0000280~nuclear division                                  | 2.59E-02 |
| GOTERM_BP_ALL                  | GO:0046324~regulation of glucose import                      | 2.60E-02 |
| GOTERM_BP_ALL                  | GO:0009719~response to endogenous stimulus                   | 2.62E-02 |
| GOTERM_BP_ALL                  | GO:0051146~striated muscle cell differentiation              | 2.63E-02 |
| GOTERM_BP_ALL                  | GO:0003018~vascular process in circulatory system            | 2.63E-02 |
| GOTERM_CC_ALL                  | GO:0044424~intracellular part                                | 2.64E-02 |
| GOTERM_BP_ALL                  | GO:0022403~cell cycle phase                                  | 2.65E-02 |
| GOTERM_BP_ALL                  | GO:0051093~negative regulation of developmental process      | 2.67E-02 |
| GOTERM_BP_ALL                  | GO:0051301~cell division                                     | 2.69E-02 |
| GOTERM_BP_ALL                  | GO:0030036~actin cytoskeleton organization                   | 2.72E-02 |
| GOTERM_BP_ALL                  | GO:0000087~M phase of mitotic cell cycle                     | 2.72E-02 |
| GOTERM_BP_ALL                  | GO:0051726~regulation of cell cycle                          | 2.74E-02 |
| GOTERM_BP_ALL                  | GO:0042692~muscle cell differentiation                       | 2.79E-02 |
| GOTERM_BP_ALL                  | GO:0014070~response to organic cyclic substance              | 2.79E-02 |
| GOTERM_BP_ALL                  | GO:0010827~regulation of glucose transport                   | 2.81E-02 |
| GOTERM_MF_ALL                  | GO:0032559~adenyl ribonucleotide binding                     | 2.82E-02 |
| GOTERM_BP_ALL                  | GO:0009991~response to extracellular stimulus                | 2.86E-02 |
| GOTERM_BP_ALL                  | GO:0045860~positive regulation of protein kinase activity    | 2.86E-02 |
| GENETIC_ASSOCIATION_DB_DISEASE | psoriasis                                                    | 2.92E-02 |
| GOTERM_CC_ALL                  | GO:0005811~lipid particle                                    | 2.93E-02 |
| GOTERM_BP_ALL                  | GO:0031098~stress-activated protein kinase signaling pathway | 2.93E-02 |
| GOTERM_BP_ALL                  | GO:0048534~hemopoietic or lymphoid organ development         | 3.00E-02 |
| GENETIC_ASSOCIATION_DB_DISEASE | prostate cancer                                              | 3.01E-02 |
| GOTERM_BP_ALL                  | GO:0001657~ureteric bud development                          | 3.03E-02 |
| GOTERM_MF_ALL                  | GO:0030674~protein binding, bridging                         | 3.03E-02 |
| GENETIC_ASSOCIATION_DB_DISEASE | graft-versus-host disease                                    | 3.07E-02 |
| GOTERM_MF_ALL                  | GO:0005244~voltage-gated ion channel activity                | 3.08E-02 |
| GOTERM_MF_ALL                  | GO:0022832~voltage-gated channel activity                    | 3.08E-02 |
| GOTERM_BP_ALL                  | GO:0051704~multi-organism process                            | 3.10E-02 |
| GOTERM_MF_ALL                  | GO:0022836~gated channel activity                            | 3.13E-02 |
| GENETIC_ASSOCIATION_DB_DISEASE | biliary atresia                                              | 3.18E-02 |
| GOTERM_MF_ALL                  | GO:0016740~transferase activity                              | 3.21E-02 |
| GOTERM_BP_ALL                  | GO:0048285~organelle fission                                 | 3.24E-02 |

Supplementary Table 7

|                                |                                                                    |          |
|--------------------------------|--------------------------------------------------------------------|----------|
| GOTERM_BP_ALL                  | GO:0045767~regulation of anti-apoptosis                            | 3.26E-02 |
| GOTERM_BP_ALL                  | GO:0045619~regulation of lymphocyte differentiation                | 3.26E-02 |
| GOTERM_BP_ALL                  | GO:0030879~mammary gland development                               | 3.26E-02 |
| GOTERM_BP_ALL                  | GO:0040012~regulation of locomotion                                | 3.27E-02 |
| GOTERM_CC_ALL                  | GO:0031941~filamentous actin                                       | 3.33E-02 |
| GOTERM_BP_ALL                  | GO:0051270~regulation of cell motion                               | 3.37E-02 |
| GOTERM_BP_ALL                  | GO:0048545~response to steroid hormone stimulus                    | 3.37E-02 |
| GOTERM_MF_ALL                  | GO:0005261~cation channel activity                                 | 3.52E-02 |
| GOTERM_MF_ALL                  | GO:0060090~molecular adaptor activity                              | 3.52E-02 |
| GOTERM_CC_ALL                  | GO:0031410~cytoplasmic vesicle                                     | 3.55E-02 |
| GOTERM_BP_ALL                  | GO:0032501~multicellular organismal process                        | 3.64E-02 |
| GOTERM_BP_ALL                  | GO:0010604~positive regulation of macromolecule metabolic process  | 3.66E-02 |
| GENETIC_ASSOCIATION_DB_DISEASE | obesity                                                            | 3.67E-02 |
| GOTERM_BP_ALL                  | GO:0051241~negative regulation of multicellular organismal process | 3.73E-02 |
| GOTERM_MF_ALL                  | GO:0016538~cyclin-dependent protein kinase regulator activity      | 3.74E-02 |
| GENETIC_ASSOCIATION_DB_DISEASE | diabetes mellitus                                                  | 3.76E-02 |
| GOTERM_BP_ALL                  | GO:0002684~positive regulation of immune system process            | 3.82E-02 |
| GOTERM_MF_ALL                  | GO:0008176~tRNA (guanine-N7-)-methyltransferase activity           | 3.83E-02 |
| GENETIC_ASSOCIATION_DB_DISEASE | kidney cancer                                                      | 3.85E-02 |
| GOTERM_BP_ALL                  | GO:0001765~membrane raft formation                                 | 3.86E-02 |
| GOTERM_BP_ALL                  | GO:0051365~cellular response to potassium ion starvation           | 3.86E-02 |
| GOTERM_MF_ALL                  | GO:0019992~diacylglycerol binding                                  | 3.87E-02 |
| GOTERM_BP_ALL                  | GO:0002694~regulation of leukocyte activation                      | 3.94E-02 |
| GOTERM_CC_ALL                  | GO:0034702~ion channel complex                                     | 3.94E-02 |
| GOTERM_BP_ALL                  | GO:0050730~regulation of peptidyl-tyrosine phosphorylation         | 3.97E-02 |
| GENETIC_ASSOCIATION_DB_DISEASE | Alzheimer's Disease                                                | 4.05E-02 |
| GOTERM_MF_ALL                  | GO:0004714~transmembrane receptor protein tyrosine kinase activity | 4.06E-02 |
| GOTERM_BP_ALL                  | GO:0007017~microtubule-based process                               | 4.09E-02 |
| GOTERM_BP_ALL                  | GO:0007155~cell adhesion                                           | 4.16E-02 |
| GOTERM_BP_ALL                  | GO:0051094~positive regulation of developmental process            | 4.16E-02 |
| GOTERM_BP_ALL                  | GO:0009790~embryonic development                                   | 4.16E-02 |
| GOTERM_MF_ALL                  | GO:0005003~ephrin receptor activity                                | 4.19E-02 |
| GOTERM_CC_ALL                  | GO:0044456~synapse part                                            | 4.19E-02 |
| GOTERM_BP_ALL                  | GO:0022610~biological adhesion                                     | 4.21E-02 |
| GOTERM_BP_ALL                  | GO:0030324~lung development                                        | 4.26E-02 |

Supplementary Table 7

|                                |                                                                   |          |
|--------------------------------|-------------------------------------------------------------------|----------|
| GOTERM_MF_ALL                  | GO:0004725~protein tyrosine phosphatase activity                  | 4.30E-02 |
| GOTERM_BP_ALL                  | GO:0048609~reproductive process in a multicellular organism       | 4.30E-02 |
| GOTERM_BP_ALL                  | GO:0032504~multicellular organism reproduction                    | 4.30E-02 |
| GOTERM_BP_ALL                  | GO:0010035~response to inorganic substance                        | 4.34E-02 |
| GOTERM_MF_ALL                  | GO:0008138~protein tyrosine/serine/threonine phosphatase activity | 4.45E-02 |
| GOTERM_BP_ALL                  | GO:0030334~regulation of cell migration                           | 4.52E-02 |
| GENETIC_ASSOCIATION_DB_DISEASE | multiple sclerosis                                                | 4.55E-02 |
| GOTERM_BP_ALL                  | GO:0006916~anti-apoptosis                                         | 4.55E-02 |
| GENETIC_ASSOCIATION_DB_DISEASE | nephropathy in other diseases                                     | 4.57E-02 |
| GOTERM_BP_ALL                  | GO:0030323~respiratory tube development                           | 4.58E-02 |
| KEGG_PATHWAY                   | hsa04722:Neurotrophin signaling pathway                           | 4.60E-02 |
| GOTERM_BP_ALL                  | GO:0043069~negative regulation of programmed cell death           | 4.61E-02 |
| GOTERM_MF_ALL                  | GO:0001883~purine nucleoside binding                              | 4.64E-02 |
| GOTERM_MF_ALL                  | GO:0030295~protein kinase activator activity                      | 4.65E-02 |
| GOTERM_MF_ALL                  | GO:0046873~metal ion transmembrane transporter activity           | 4.65E-02 |
| GOTERM_BP_ALL                  | GO:0060548~negative regulation of cell death                      | 4.66E-02 |
| GOTERM_BP_ALL                  | GO:0001937~negative regulation of endothelial cell proliferation  | 4.72E-02 |
| GOTERM_BP_ALL                  | GO:0044087~regulation of cellular component biogenesis            | 4.73E-02 |
| GOTERM_BP_ALL                  | GO:0050678~regulation of epithelial cell proliferation            | 4.76E-02 |
| GOTERM_BP_ALL                  | GO:0051179~localization                                           | 4.89E-02 |

### Pink Module

| Category      | Term                                    | PValue   |
|---------------|-----------------------------------------|----------|
| GOTERM_CC_ALL | GO:0000793~condensed chromosome         | 3.88E-06 |
| GOTERM_CC_ALL | GO:0012505~endomembrane system          | 6.03E-06 |
| GOTERM_CC_ALL | GO:0005694~chromosome                   | 8.27E-06 |
| GOTERM_MF_ALL | GO:0008092~cytoskeletal protein binding | 1.26E-05 |
| GOTERM_BP_ALL | GO:0007049~cell cycle                   | 2.29E-05 |
| GOTERM_CC_ALL | GO:0005737~cytoplasm                    | 3.05E-05 |
| GOTERM_CC_ALL | GO:0044427~chromosomal part             | 4.46E-05 |
| GOTERM_CC_ALL | GO:0042995~cell projection              | 1.04E-04 |
| GOTERM_CC_ALL | GO:0044459~plasma membrane part         | 1.15E-04 |
| GOTERM_CC_ALL | GO:0044446~intracellular organelle part | 1.76E-04 |

Supplementary Table 7

|               |                                                             |          |
|---------------|-------------------------------------------------------------|----------|
| GOTERM_BP_ALL | GO:0022402~cell cycle process                               | 2.01E-04 |
| GOTERM_MF_ALL | GO:0005515~protein binding                                  | 2.12E-04 |
| GOTERM_MF_ALL | GO:0003779~actin binding                                    | 2.21E-04 |
| GOTERM_CC_ALL | GO:0044422~organelle part                                   | 2.58E-04 |
| GOTERM_BP_ALL | GO:0007059~chromosome segregation                           | 2.73E-04 |
| GOTERM_BP_ALL | GO:0022403~cell cycle phase                                 | 3.12E-04 |
| GOTERM_CC_ALL | GO:0044464~cell part                                        | 3.32E-04 |
| GOTERM_CC_ALL | GO:0044424~intracellular part                               | 3.33E-04 |
| GOTERM_CC_ALL | GO:0044432~endoplasmic reticulum part                       | 3.37E-04 |
| GOTERM_CC_ALL | GO:0005623~cell                                             | 3.40E-04 |
| GOTERM_CC_ALL | GO:0031252~cell leading edge                                | 3.79E-04 |
| GOTERM_MF_ALL | GO:0001882~nucleoside binding                               | 4.80E-04 |
| GOTERM_CC_ALL | GO:0043228~non-membrane-bounded organelle                   | 4.80E-04 |
| GOTERM_CC_ALL | GO:0043232~intracellular non-membrane-bounded organelle     | 4.80E-04 |
| GOTERM_MF_ALL | GO:0030554~adenyl nucleotide binding                        | 4.81E-04 |
| GOTERM_BP_ALL | GO:0016043~cellular component organization                  | 4.83E-04 |
| GOTERM_CC_ALL | GO:0044444~cytoplasmic part                                 | 5.53E-04 |
| GOTERM_MF_ALL | GO:0001883~purine nucleoside binding                        | 5.72E-04 |
| GOTERM_CC_ALL | GO:0005789~endoplasmic reticulum membrane                   | 5.93E-04 |
| GOTERM_CC_ALL | GO:0042175~nuclear envelope-endoplasmic reticulum network   | 6.18E-04 |
| GOTERM_MF_ALL | GO:0005516~calmodulin binding                               | 6.72E-04 |
| GOTERM_CC_ALL | GO:0044428~nuclear part                                     | 7.24E-04 |
| GOTERM_CC_ALL | GO:0000228~nuclear chromosome                               | 7.98E-04 |
| GOTERM_CC_ALL | GO:0005622~intracellular                                    | 8.33E-04 |
| GOTERM_MF_ALL | GO:0032559~adenyl ribonucleotide binding                    | 8.78E-04 |
| GOTERM_CC_ALL | GO:0005886~plasma membrane                                  | 9.52E-04 |
| GOTERM_BP_ALL | GO:0006297~nucleotide-excision repair, DNA gap filling      | 1.04E-03 |
| GOTERM_MF_ALL | GO:0005524~ATP binding                                      | 1.20E-03 |
| GOTERM_BP_ALL | GO:0006260~DNA replication                                  | 1.26E-03 |
| GOTERM_MF_ALL | GO:0017076~purine nucleotide binding                        | 1.28E-03 |
| GOTERM_CC_ALL | GO:0005829~cytosol                                          | 1.32E-03 |
| GOTERM_BP_ALL | GO:0007167~enzyme linked receptor protein signaling pathway | 1.46E-03 |
| GOTERM_CC_ALL | GO:0000794~condensed nuclear chromosome                     | 1.92E-03 |
| GOTERM_MF_ALL | GO:0032553~ribonucleotide binding                           | 2.11E-03 |
| GOTERM_MF_ALL | GO:0032555~purine ribonucleotide binding                    | 2.11E-03 |

Supplementary Table 7

|               |                                                                             |          |
|---------------|-----------------------------------------------------------------------------|----------|
| GOTERM_BP_ALL | GO:0000226~microtubule cytoskeleton organization                            | 2.12E-03 |
| KEGG_PATHWAY  | hsa03030:DNA replication                                                    | 2.13E-03 |
| GOTERM_CC_ALL | GO:0043005~neuron projection                                                | 2.28E-03 |
| GOTERM_BP_ALL | GO:0000278~mitotic cell cycle                                               | 2.47E-03 |
| GOTERM_CC_ALL | GO:0000775~chromosome, centromeric region                                   | 2.54E-03 |
| GOTERM_BP_ALL | GO:0000279~M phase                                                          | 2.79E-03 |
| GOTERM_BP_ALL | GO:0042490~mechanoreceptor differentiation                                  | 2.80E-03 |
| GOTERM_BP_ALL | GO:0007017~microtubule-based process                                        | 2.86E-03 |
| GOTERM_CC_ALL | GO:0031981~nuclear lumen                                                    | 2.90E-03 |
| GOTERM_CC_ALL | GO:0000267~cell fraction                                                    | 3.46E-03 |
| GOTERM_CC_ALL | GO:0043025~cell soma                                                        | 3.47E-03 |
| GOTERM_CC_ALL | GO:0031227~intrinsic to endoplasmic reticulum membrane                      | 3.57E-03 |
| GOTERM_CC_ALL | GO:0070013~intracellular organelle lumen                                    | 3.99E-03 |
| GOTERM_MF_ALL | GO:0016772~transferase activity, transferring phosphorus-containing groups  | 4.21E-03 |
| GOTERM_BP_ALL | GO:0006996~organelle organization                                           | 4.27E-03 |
| GOTERM_CC_ALL | GO:0031090~organelle membrane                                               | 4.40E-03 |
| GOTERM_CC_ALL | GO:0043233~organelle lumen                                                  | 4.47E-03 |
| GOTERM_CC_ALL | GO:0000779~condensed chromosome, centromeric region                         | 4.90E-03 |
| GOTERM_BP_ALL | GO:0007169~transmembrane receptor protein tyrosine kinase signaling pathway | 5.39E-03 |
| GOTERM_BP_ALL | GO:0006305~DNA alkylation                                                   | 5.91E-03 |
| GOTERM_BP_ALL | GO:0006306~DNA methylation                                                  | 5.91E-03 |
| GOTERM_BP_ALL | GO:0060113~inner ear receptor cell differentiation                          | 5.91E-03 |
| GOTERM_BP_ALL | GO:0006519~cellular amino acid and derivative metabolic process             | 6.04E-03 |
| GOTERM_MF_ALL | GO:0005509~calcium ion binding                                              | 6.31E-03 |
| GOTERM_CC_ALL | GO:0005654~nucleoplasm                                                      | 6.52E-03 |
| GOTERM_CC_ALL | GO:0045202~synapse                                                          | 6.57E-03 |
| GOTERM_CC_ALL | GO:0005624~membrane fraction                                                | 6.90E-03 |
| GOTERM_MF_ALL | GO:0016301~kinase activity                                                  | 6.94E-03 |
| GOTERM_MF_ALL | GO:0000166~nucleotide binding                                               | 7.07E-03 |
| GOTERM_MF_ALL | GO:0005488~binding                                                          | 7.10E-03 |
| GOTERM_CC_ALL | GO:0000777~condensed chromosome kinetochore                                 | 7.28E-03 |
| GOTERM_CC_ALL | GO:0031974~membrane-enclosed lumen                                          | 7.61E-03 |
| GOTERM_BP_ALL | GO:0032989~cellular component morphogenesis                                 | 8.06E-03 |
| GOTERM_CC_ALL | GO:0030054~cell junction                                                    | 8.35E-03 |
| GOTERM_MF_ALL | GO:0015171~amino acid transmembrane transporter activity                    | 8.57E-03 |

Supplementary Table 7

|               |                                                                                     |          |
|---------------|-------------------------------------------------------------------------------------|----------|
| KEGG_PATHWAY  | hsa00561:Glycerolipid metabolism                                                    | 9.10E-03 |
| GOTERM_CC_ALL | GO:0005626~insoluble fraction                                                       | 9.11E-03 |
| GOTERM_BP_ALL | GO:0046903~secretion                                                                | 9.39E-03 |
| GOTERM_BP_ALL | GO:0000731~DNA synthesis during DNA repair                                          | 9.44E-03 |
| GOTERM_BP_ALL | GO:0050910~detection of mechanical stimulus involved in sensory perception of sound | 9.44E-03 |
| GOTERM_CC_ALL | GO:0005635~nuclear envelope                                                         | 9.68E-03 |
| GOTERM_BP_ALL | GO:0007010~cytoskeleton organization                                                | 1.01E-02 |
| GOTERM_BP_ALL | GO:0007589~body fluid secretion                                                     | 1.01E-02 |
| GOTERM_CC_ALL | GO:0030496~midbody                                                                  | 1.03E-02 |
| GOTERM_BP_ALL | GO:0009308~amine metabolic process                                                  | 1.10E-02 |
| GOTERM_BP_ALL | GO:0044106~cellular amine metabolic process                                         | 1.10E-02 |
| GOTERM_CC_ALL | GO:0031300~intrinsic to organelle membrane                                          | 1.11E-02 |
| GOTERM_CC_ALL | GO:0000776~kinetochore                                                              | 1.12E-02 |
| GOTERM_MF_ALL | GO:0003824~catalytic activity                                                       | 1.14E-02 |
| GOTERM_BP_ALL | GO:0006259~DNA metabolic process                                                    | 1.19E-02 |
| GOTERM_CC_ALL | GO:0030425~dendrite                                                                 | 1.27E-02 |
| GOTERM_BP_ALL | GO:0009064~glutamine family amino acid metabolic process                            | 1.31E-02 |
| GOTERM_BP_ALL | GO:0051129~negative regulation of cellular component organization                   | 1.32E-02 |
| GOTERM_BP_ALL | GO:0051321~meiotic cell cycle                                                       | 1.32E-02 |
| GOTERM_MF_ALL | GO:0016773~phosphotransferase activity, alcohol group as acceptor                   | 1.36E-02 |
| GOTERM_BP_ALL | GO:0006793~phosphorus metabolic process                                             | 1.37E-02 |
| GOTERM_BP_ALL | GO:0006796~phosphate metabolic process                                              | 1.37E-02 |
| GOTERM_BP_ALL | GO:0006468~protein amino acid phosphorylation                                       | 1.37E-02 |
| GOTERM_CC_ALL | GO:0001726~ruffle                                                                   | 1.42E-02 |
| GOTERM_BP_ALL | GO:0048285~organelle fission                                                        | 1.44E-02 |
| GOTERM_CC_ALL | GO:0033267~axon part                                                                | 1.48E-02 |
| GOTERM_CC_ALL | GO:0043229~intracellular organelle                                                  | 1.48E-02 |
| GOTERM_BP_ALL | GO:0051320~S phase                                                                  | 1.53E-02 |
| GOTERM_BP_ALL | GO:0000084~S phase of mitotic cell cycle                                            | 1.53E-02 |
| GOTERM_CC_ALL | GO:0005856~cytoskeleton                                                             | 1.59E-02 |
| GOTERM_BP_ALL | GO:0051329~interphase of mitotic cell cycle                                         | 1.63E-02 |
| GOTERM_BP_ALL | GO:0006865~amino acid transport                                                     | 1.63E-02 |
| GOTERM_CC_ALL | GO:0043226~organelle                                                                | 1.66E-02 |
| GOTERM_MF_ALL | GO:0046943~carboxylic acid transmembrane transporter activity                       | 1.68E-02 |
| GOTERM_BP_ALL | GO:0000910~cytokinesis                                                              | 1.68E-02 |

Supplementary Table 7

|                                |                                                                            |          |
|--------------------------------|----------------------------------------------------------------------------|----------|
| GOTERM_BP_ALL                  | GO:0043412~biopolymer modification                                         | 1.69E-02 |
| GOTERM_MF_ALL                  | GO:0030234~enzyme regulator activity                                       | 1.70E-02 |
| GOTERM_BP_ALL                  | GO:0009987~cellular process                                                | 1.72E-02 |
| GOTERM_BP_ALL                  | GO:0048839~inner ear development                                           | 1.73E-02 |
| KEGG_PATHWAY                   | hsa04360:Axon guidance                                                     | 1.74E-02 |
| GOTERM_MF_ALL                  | GO:0005342~organic acid transmembrane transporter activity                 | 1.80E-02 |
| GOTERM_MF_ALL                  | GO:0051020~GTPase binding                                                  | 1.86E-02 |
| GOTERM_BP_ALL                  | GO:0046942~carboxylic acid transport                                       | 1.86E-02 |
| GOTERM_BP_ALL                  | GO:0007127~meiosis I                                                       | 1.89E-02 |
| GOTERM_MF_ALL                  | GO:0008047~enzyme activator activity                                       | 1.91E-02 |
| GOTERM_CC_ALL                  | GO:0030424~axon                                                            | 1.91E-02 |
| GOTERM_CC_ALL                  | GO:0005657~replication fork                                                | 1.92E-02 |
| GOTERM_BP_ALL                  | GO:0006520~cellular amino acid metabolic process                           | 1.93E-02 |
| GOTERM_BP_ALL                  | GO:0015849~organic acid transport                                          | 1.96E-02 |
| GOTERM_MF_ALL                  | GO:0030695~GTPase regulator activity                                       | 1.97E-02 |
| GOTERM_CC_ALL                  | GO:0030027~lamellipodium                                                   | 1.98E-02 |
| GOTERM_BP_ALL                  | GO:0051325~interphase                                                      | 1.99E-02 |
| GOTERM_BP_ALL                  | GO:0043583~ear development                                                 | 2.02E-02 |
| GOTERM_BP_ALL                  | GO:0007268~synaptic transmission                                           | 2.06E-02 |
| GOTERM_CC_ALL                  | GO:0016020~membrane                                                        | 2.06E-02 |
| GOTERM_MF_ALL                  | GO:0016740~transferase activity                                            | 2.09E-02 |
| GOTERM_BP_ALL                  | GO:0007051~spindle organization                                            | 2.11E-02 |
| GOTERM_BP_ALL                  | GO:0006304~DNA modification                                                | 2.12E-02 |
| GOTERM_MF_ALL                  | GO:0046873~metal ion transmembrane transporter activity                    | 2.12E-02 |
| GENETIC_ASSOCIATION_DB_DISEASE | schizophrenia                                                              | 2.13E-02 |
| GOTERM_MF_ALL                  | GO:0005272~sodium channel activity                                         | 2.14E-02 |
| GOTERM_CC_ALL                  | GO:0005954~calcium- and calmodulin-dependent protein kinase complex        | 2.20E-02 |
| GOTERM_BP_ALL                  | GO:0043687~post-translational protein modification                         | 2.24E-02 |
| KEGG_PATHWAY                   | hsa00564:Glycerophospholipid metabolism                                    | 2.53E-02 |
| GOTERM_MF_ALL                  | GO:0060589~nucleoside-triphosphatase regulator activity                    | 2.59E-02 |
| GOTERM_CC_ALL                  | GO:0005887~integral to plasma membrane                                     | 2.67E-02 |
| KEGG_PATHWAY                   | hsa03430:Mismatch repair                                                   | 2.72E-02 |
| GOTERM_BP_ALL                  | GO:0015813~L-glutamate transport                                           | 2.75E-02 |
| GOTERM_BP_ALL                  | GO:0050974~detection of mechanical stimulus involved in sensory perception | 2.75E-02 |
| GOTERM_BP_ALL                  | GO:0051327~M phase of meiotic cell cycle                                   | 2.82E-02 |



Supplementary Table 7

|               |                                                                                                            |          |
|---------------|------------------------------------------------------------------------------------------------------------|----------|
| GOTERM_BP_ALL | GO:0007126~meiosis                                                                                         | 2.82E-02 |
| GOTERM_MF_ALL | GO:0042803~protein homodimerization activity                                                               | 2.85E-02 |
| GOTERM_CC_ALL | GO:0043198~dendritic shaft                                                                                 | 2.90E-02 |
| GOTERM_BP_ALL | GO:0006464~protein modification process                                                                    | 2.94E-02 |
| GOTERM_BP_ALL | GO:0000902~cell morphogenesis                                                                              | 2.97E-02 |
| GOTERM_BP_ALL | GO:0051179~localization                                                                                    | 3.05E-02 |
| GOTERM_CC_ALL | GO:0043679~nerve terminal                                                                                  | 3.06E-02 |
| GOTERM_MF_ALL | GO:0005275~amine transmembrane transporter activity                                                        | 3.11E-02 |
| GOTERM_MF_ALL | GO:0005261~cation channel activity                                                                         | 3.16E-02 |
| GOTERM_CC_ALL | GO:0031226~intrinsic to plasma membrane                                                                    | 3.19E-02 |
| GOTERM_CC_ALL | GO:0005663~DNA replication factor C complex                                                                | 3.19E-02 |
| GOTERM_CC_ALL | GO:0009986~cell surface                                                                                    | 3.24E-02 |
| GOTERM_CC_ALL | GO:0044454~nuclear chromosome part                                                                         | 3.30E-02 |
| GOTERM_MF_ALL | GO:0046983~protein dimerization activity                                                                   | 3.33E-02 |
| GOTERM_BP_ALL | GO:0006268~DNA unwinding during replication                                                                | 3.37E-02 |
| GOTERM_BP_ALL | GO:0010171~body morphogenesis                                                                              | 3.37E-02 |
| GOTERM_BP_ALL | GO:0000280~nuclear division                                                                                | 3.44E-02 |
| GOTERM_BP_ALL | GO:0007067~mitosis                                                                                         | 3.44E-02 |
| GOTERM_MF_ALL | GO:0022892~substrate-specific transporter activity                                                         | 3.45E-02 |
| GOTERM_BP_ALL | GO:0000087~M phase of mitotic cell cycle                                                                   | 3.72E-02 |
| GOTERM_MF_ALL | GO:0004143~diacylglycerol kinase activity                                                                  | 3.75E-02 |
| GOTERM_BP_ALL | GO:0048015~phosphoinositide-mediated signaling                                                             | 3.77E-02 |
| GOTERM_MF_ALL | GO:0022891~substrate-specific transmembrane transporter activity                                           | 3.79E-02 |
| GOTERM_BP_ALL | GO:0010721~negative regulation of cell development                                                         | 3.79E-02 |
| GOTERM_BP_ALL | GO:0000070~mitotic sister chromatid segregation                                                            | 3.80E-02 |
| GOTERM_BP_ALL | GO:0007205~activation of protein kinase C activity by G-protein coupled receptor protein signaling pathway | 3.80E-02 |
| GOTERM_BP_ALL | GO:0040029~regulation of gene expression, epigenetic                                                       | 3.88E-02 |
| GOTERM_BP_ALL | GO:0050000~chromosome localization                                                                         | 4.05E-02 |
| GOTERM_BP_ALL | GO:0051303~establishment of chromosome localization                                                        | 4.05E-02 |
| GOTERM_BP_ALL | GO:0015800~acidic amino acid transport                                                                     | 4.05E-02 |
| GOTERM_MF_ALL | GO:0015179~L-amino acid transmembrane transporter activity                                                 | 4.17E-02 |
| GOTERM_BP_ALL | GO:0000819~sister chromatid segregation                                                                    | 4.21E-02 |
| GOTERM_CC_ALL | GO:0016323~basolateral plasma membrane                                                                     | 4.21E-02 |
| GOTERM_BP_ALL | GO:0016310~phosphorylation                                                                                 | 4.25E-02 |
| GOTERM_BP_ALL | GO:0033043~regulation of organelle organization                                                            | 4.38E-02 |

Supplementary Table 7

|                                |                                                                    |          |
|--------------------------------|--------------------------------------------------------------------|----------|
| GOTERM_BP_ALL                  | GO:0007173~epidermal growth factor receptor signaling pathway      | 4.44E-02 |
| GOTERM_BP_ALL                  | GO:0048468~cell development                                        | 4.44E-02 |
| GOTERM_BP_ALL                  | GO:0006333~chromatin assembly or disassembly                       | 4.70E-02 |
| GENETIC_ASSOCIATION_DB_DISEASE | temperament                                                        | 4.75E-02 |
| GOTERM_BP_ALL                  | GO:0050982~detection of mechanical stimulus                        | 4.79E-02 |
| GOTERM_BP_ALL                  | GO:0008634~negative regulation of survival gene product expression | 4.81E-02 |
| GOTERM_BP_ALL                  | GO:0010632~regulation of epithelial cell migration                 | 4.81E-02 |
| GOTERM_BP_ALL                  | GO:0031503~protein complex localization                            | 4.81E-02 |
| GOTERM_BP_ALL                  | GO:0015810~aspartate transport                                     | 4.81E-02 |
| GOTERM_CC_ALL                  | GO:0043231~intracellular membrane-bounded organelle                | 4.86E-02 |
| GOTERM_BP_ALL                  | GO:0051338~regulation of transferase activity                      | 4.88E-02 |
| GOTERM_BP_ALL                  | GO:0001764~neuron migration                                        | 4.88E-02 |
| GOTERM_CC_ALL                  | GO:0044425~membrane part                                           | 4.99E-02 |

**Royal blue Module**

| <b>Category</b> | <b>Term</b>                                     | <b>PValue</b> |
|-----------------|-------------------------------------------------|---------------|
| GOTERM_BP_ALL   | GO:0007155~cell adhesion                        | 7.42E-06      |
| GOTERM_BP_ALL   | GO:0022610~biological adhesion                  | 7.76E-06      |
| KEGG_PATHWAY    | hsa00230:Purine metabolism                      | 1.11E-04      |
| GOTERM_BP_ALL   | GO:0007399~nervous system development           | 2.21E-04      |
| GOTERM_BP_ALL   | GO:0048731~system development                   | 2.56E-04      |
| GOTERM_CC_ALL   | GO:0005578~proteinaceous extracellular matrix   | 3.88E-04      |
| GOTERM_CC_ALL   | GO:0044459~plasma membrane part                 | 4.61E-04      |
| GOTERM_CC_ALL   | GO:0031012~extracellular matrix                 | 6.03E-04      |
| GOTERM_BP_ALL   | GO:0048856~anatomical structure development     | 6.18E-04      |
| GOTERM_MF_ALL   | GO:0005509~calcium ion binding                  | 6.93E-04      |
| GOTERM_MF_ALL   | GO:0005515~protein binding                      | 7.55E-04      |
| GOTERM_BP_ALL   | GO:0032502~developmental process                | 1.16E-03      |
| GOTERM_BP_ALL   | GO:0007275~multicellular organismal development | 1.34E-03      |
| GOTERM_BP_ALL   | GO:0005996~monosaccharide metabolic process     | 1.87E-03      |
| GOTERM_BP_ALL   | GO:0022008~neurogenesis                         | 2.30E-03      |
| GOTERM_BP_ALL   | GO:0042445~hormone metabolic process            | 2.30E-03      |
| GOTERM_BP_ALL   | GO:0006979~response to oxidative stress         | 2.54E-03      |

Supplementary Table 7

|                                |                                                                            |          |
|--------------------------------|----------------------------------------------------------------------------|----------|
| GOTERM_BP_ALL                  | GO:0001755~neural crest cell migration                                     | 2.56E-03 |
| GOTERM_BP_ALL                  | GO:0014033~neural crest cell differentiation                               | 2.74E-03 |
| GOTERM_BP_ALL                  | GO:0014032~neural crest cell development                                   | 2.74E-03 |
| GOTERM_CC_ALL                  | GO:0005886~plasma membrane                                                 | 2.84E-03 |
| GOTERM_BP_ALL                  | GO:0006006~glucose metabolic process                                       | 3.02E-03 |
| GOTERM_BP_ALL                  | GO:0030182~neuron differentiation                                          | 4.12E-03 |
| GOTERM_MF_ALL                  | GO:0016772~transferase activity, transferring phosphorus-containing groups | 4.36E-03 |
| GOTERM_BP_ALL                  | GO:0044275~cellular carbohydrate catabolic process                         | 4.45E-03 |
| GOTERM_BP_ALL                  | GO:0019318~hexose metabolic process                                        | 5.04E-03 |
| GOTERM_BP_ALL                  | GO:0001667~ameboidal cell migration                                        | 5.06E-03 |
| GOTERM_BP_ALL                  | GO:0007167~enzyme linked receptor protein signaling pathway                | 5.10E-03 |
| GOTERM_MF_ALL                  | GO:0005488~binding                                                         | 5.56E-03 |
| GOTERM_CC_ALL                  | GO:0044421~extracellular region part                                       | 5.58E-03 |
| GOTERM_CC_ALL                  | GO:0048471~perinuclear region of cytoplasm                                 | 5.75E-03 |
| GOTERM_BP_ALL                  | GO:0048699~generation of neurons                                           | 5.96E-03 |
| GOTERM_BP_ALL                  | GO:0045597~positive regulation of cell differentiation                     | 6.25E-03 |
| GOTERM_BP_ALL                  | GO:0014031~mesenchymal cell development                                    | 6.82E-03 |
| GOTERM_BP_ALL                  | GO:0048762~mesenchymal cell differentiation                                | 6.82E-03 |
| GOTERM_BP_ALL                  | GO:0060485~mesenchyme development                                          | 7.60E-03 |
| GOTERM_BP_ALL                  | GO:0016051~carbohydrate biosynthetic process                               | 8.86E-03 |
| GOTERM_MF_ALL                  | GO:0016779~nucleotidyltransferase activity                                 | 9.01E-03 |
| GOTERM_CC_ALL                  | GO:0031225~anchored to membrane                                            | 9.37E-03 |
| GOTERM_MF_ALL                  | GO:0008013~beta-catenin binding                                            | 9.62E-03 |
| GOTERM_BP_ALL                  | GO:0046164~alcohol catabolic process                                       | 9.79E-03 |
| GENETIC_ASSOCIATION_DB_DISEASE | colorectal cancer                                                          | 1.02E-02 |
| GOTERM_BP_ALL                  | GO:0006720~isoprenoid metabolic process                                    | 1.08E-02 |
| GOTERM_BP_ALL                  | GO:0034599~cellular response to oxidative stress                           | 1.08E-02 |
| GOTERM_MF_ALL                  | GO:0005102~receptor binding                                                | 1.14E-02 |
| GOTERM_BP_ALL                  | GO:0051094~positive regulation of developmental process                    | 1.22E-02 |
| GOTERM_BP_ALL                  | GO:0040012~regulation of locomotion                                        | 1.23E-02 |
| GOTERM_MF_ALL                  | GO:0016740~transferase activity                                            | 1.29E-02 |
| GOTERM_BP_ALL                  | GO:0009890~negative regulation of biosynthetic process                     | 1.30E-02 |
| GOTERM_BP_ALL                  | GO:0046165~alcohol biosynthetic process                                    | 1.35E-02 |
| GOTERM_CC_ALL                  | GO:0046658~anchored to plasma membrane                                     | 1.38E-02 |
| GOTERM_MF_ALL                  | GO:0016918~retinal binding                                                 | 1.42E-02 |

Supplementary Table 7

|               |                                                                                     |          |
|---------------|-------------------------------------------------------------------------------------|----------|
| GOTERM_BP_ALL | GO:0006066~alcohol metabolic process                                                | 1.44E-02 |
| GOTERM_BP_ALL | GO:0010646~regulation of cell communication                                         | 1.44E-02 |
| GOTERM_BP_ALL | GO:0007156~homophilic cell adhesion                                                 | 1.45E-02 |
| GOTERM_BP_ALL | GO:0010817~regulation of hormone levels                                             | 1.49E-02 |
| KEGG_PATHWAY  | hsa00240:Pyrimidine metabolism                                                      | 1.49E-02 |
| GOTERM_BP_ALL | GO:0031327~negative regulation of cellular biosynthetic process                     | 1.54E-02 |
| GOTERM_BP_ALL | GO:0006310~DNA recombination                                                        | 1.57E-02 |
| GOTERM_BP_ALL | GO:0007178~transmembrane receptor protein serine/threonine kinase signaling pathway | 1.57E-02 |
| GOTERM_CC_ALL | GO:0019898~extrinsic to membrane                                                    | 1.62E-02 |
| GOTERM_CC_ALL | GO:0005593~FACIT collagen                                                           | 1.73E-02 |
| GOTERM_MF_ALL | GO:0015291~secondary active transmembrane transporter activity                      | 1.74E-02 |
| GOTERM_BP_ALL | GO:0006776~vitamin A metabolic process                                              | 1.84E-02 |
| GOTERM_BP_ALL | GO:0001523~retinoid metabolic process                                               | 1.84E-02 |
| GOTERM_BP_ALL | GO:0016101~diterpenoid metabolic process                                            | 1.84E-02 |
| GOTERM_BP_ALL | GO:0030334~regulation of cell migration                                             | 1.91E-02 |
| GOTERM_BP_ALL | GO:0009892~negative regulation of metabolic process                                 | 1.92E-02 |
| GOTERM_MF_ALL | GO:0005083~small GTPase regulator activity                                          | 2.09E-02 |
| GOTERM_BP_ALL | GO:0006275~regulation of DNA replication                                            | 2.12E-02 |
| GOTERM_BP_ALL | GO:0030278~regulation of ossification                                               | 2.25E-02 |
| GOTERM_CC_ALL | GO:0044420~extracellular matrix part                                                | 2.26E-02 |
| GOTERM_BP_ALL | GO:0016052~carbohydrate catabolic process                                           | 2.26E-02 |
| GOTERM_BP_ALL | GO:0007263~nitric oxide mediated signal transduction                                | 2.30E-02 |
| GOTERM_MF_ALL | GO:0008092~cytoskeletal protein binding                                             | 2.42E-02 |
| GOTERM_BP_ALL | GO:0046364~monosaccharide biosynthetic process                                      | 2.43E-02 |
| GOTERM_BP_ALL | GO:0045669~positive regulation of osteoblast differentiation                        | 2.45E-02 |
| GOTERM_BP_ALL | GO:0006695~cholesterol biosynthetic process                                         | 2.45E-02 |
| GOTERM_BP_ALL | GO:0006721~terpenoid metabolic process                                              | 2.45E-02 |
| GOTERM_CC_ALL | GO:0031226~intrinsic to plasma membrane                                             | 2.45E-02 |
| GOTERM_MF_ALL | GO:0005201~extracellular matrix structural constituent                              | 2.53E-02 |
| GOTERM_MF_ALL | GO:0060589~nucleoside-triphosphatase regulator activity                             | 2.59E-02 |
| GOTERM_MF_ALL | GO:0070568~guanylyltransferase activity                                             | 2.62E-02 |
| GOTERM_BP_ALL | GO:0051270~regulation of cell motion                                                | 2.64E-02 |
| GOTERM_MF_ALL | GO:0050681~androgen receptor binding                                                | 2.64E-02 |
| GOTERM_BP_ALL | GO:0031324~negative regulation of cellular metabolic process                        | 2.71E-02 |
| GOTERM_BP_ALL | GO:0010558~negative regulation of macromolecule biosynthetic process                | 2.72E-02 |

Supplementary Table 7

|                                |                                                                             |          |
|--------------------------------|-----------------------------------------------------------------------------|----------|
| GOTERM_BP_ALL                  | GO:0051130~positive regulation of cellular component organization           | 3.09E-02 |
| GOTERM_BP_ALL                  | GO:0051052~regulation of DNA metabolic process                              | 3.16E-02 |
| GOTERM_BP_ALL                  | GO:0009966~regulation of signal transduction                                | 3.19E-02 |
| GOTERM_BP_ALL                  | GO:0050850~positive regulation of calcium-mediated signaling                | 3.31E-02 |
| GOTERM_BP_ALL                  | GO:0019320~hexose catabolic process                                         | 3.32E-02 |
| GOTERM_MF_ALL                  | GO:0030695~GTPase regulator activity                                        | 3.36E-02 |
| GOTERM_BP_ALL                  | GO:0050793~regulation of developmental process                              | 3.37E-02 |
| GOTERM_BP_ALL                  | GO:0042476~odontogenesis                                                    | 3.40E-02 |
| GOTERM_CC_ALL                  | GO:0005606~laminin-1 complex                                                | 3.42E-02 |
| GOTERM_MF_ALL                  | GO:0016301~kinase activity                                                  | 3.44E-02 |
| GOTERM_BP_ALL                  | GO:0034637~cellular carbohydrate biosynthetic process                       | 3.55E-02 |
| GOTERM_MF_ALL                  | GO:0005536~glucose binding                                                  | 3.56E-02 |
| GOTERM_BP_ALL                  | GO:0045859~regulation of protein kinase activity                            | 3.69E-02 |
| GOTERM_BP_ALL                  | GO:0046365~monosaccharide catabolic process                                 | 3.80E-02 |
| GOTERM_BP_ALL                  | GO:0009987~cellular process                                                 | 3.85E-02 |
| GOTERM_MF_ALL                  | GO:0008134~transcription factor binding                                     | 3.90E-02 |
| GOTERM_MF_ALL                  | GO:0051427~hormone receptor binding                                         | 3.91E-02 |
| GOTERM_BP_ALL                  | GO:0007169~transmembrane receptor protein tyrosine kinase signaling pathway | 3.98E-02 |
| KEGG_PATHWAY                   | hsa03440:Homologous recombination                                           | 4.07E-02 |
| GOTERM_MF_ALL                  | GO:0019205~nucleobase, nucleoside, nucleotide kinase activity               | 4.07E-02 |
| GOTERM_CC_ALL                  | GO:0005737~cytoplasm                                                        | 4.35E-02 |
| KEGG_PATHWAY                   | hsa00620:Pyruvate metabolism                                                | 4.40E-02 |
| GOTERM_CC_ALL                  | GO:0030934~anchoring collagen                                               | 4.43E-02 |
| GOTERM_BP_ALL                  | GO:0030501~positive regulation of bone mineralization                       | 4.51E-02 |
| GENETIC_ASSOCIATION_DB_DISEASE | cerebrovascular disease                                                     | 4.56E-02 |
| GOTERM_CC_ALL                  | GO:0043232~intracellular non-membrane-bounded organelle                     | 4.58E-02 |
| GOTERM_CC_ALL                  | GO:0043228~non-membrane-bounded organelle                                   | 4.58E-02 |
| GOTERM_BP_ALL                  | GO:0007179~transforming growth factor beta receptor signaling pathway       | 4.59E-02 |
| GOTERM_BP_ALL                  | GO:0051338~regulation of transferase activity                               | 4.65E-02 |
| GOTERM_BP_ALL                  | GO:0048869~cellular developmental process                                   | 4.78E-02 |
| GOTERM_CC_ALL                  | GO:0005576~extracellular region                                             | 4.90E-02 |
| GOTERM_BP_ALL                  | GO:0000302~response to reactive oxygen species                              | 4.90E-02 |
| GOTERM_BP_ALL                  | GO:0034754~cellular hormone metabolic process                               | 4.93E-02 |
| GOTERM_BP_ALL                  | GO:0008284~positive regulation of cell proliferation                        | 4.97E-02 |
| GENETIC_ASSOCIATION_DB_DISEASE | <i>schizophrenia</i>                                                        | 5.86E-02 |

Supplementary Table 7

**Turquoise Module**

| <b>Category</b> | <b>Term</b>                                                      | <b>PValue</b> |
|-----------------|------------------------------------------------------------------|---------------|
| GOTERM_CC_ALL   | GO:0043005~neuron projection                                     | 1.27E-06      |
| GOTERM_BP_ALL   | GO:0007399~nervous system development                            | 5.41E-06      |
| GOTERM_BP_ALL   | GO:0019226~transmission of nerve impulse                         | 9.69E-06      |
| GOTERM_BP_ALL   | GO:0000904~cell morphogenesis involved in differentiation        | 1.47E-05      |
| GOTERM_CC_ALL   | GO:0042995~cell projection                                       | 1.69E-05      |
| GOTERM_BP_ALL   | GO:0048812~neuron projection morphogenesis                       | 1.81E-05      |
| GOTERM_BP_ALL   | GO:0048468~cell development                                      | 2.02E-05      |
| GOTERM_BP_ALL   | GO:0031175~neuron projection development                         | 2.37E-05      |
| GOTERM_BP_ALL   | GO:0065008~regulation of biological quality                      | 2.45E-05      |
| GOTERM_CC_ALL   | GO:0030424~axon                                                  | 2.57E-05      |
| GOTERM_BP_ALL   | GO:0007268~synaptic transmission                                 | 2.67E-05      |
| GOTERM_BP_ALL   | GO:0044057~regulation of system process                          | 3.33E-05      |
| GOTERM_BP_ALL   | GO:0007409~axonogenesis                                          | 3.62E-05      |
| GOTERM_BP_ALL   | GO:0030030~cell projection organization                          | 6.80E-05      |
| GOTERM_BP_ALL   | GO:0048858~cell projection morphogenesis                         | 7.20E-05      |
| GOTERM_BP_ALL   | GO:0048667~cell morphogenesis involved in neuron differentiation | 7.52E-05      |
| GOTERM_BP_ALL   | GO:0051239~regulation of multicellular organismal process        | 1.07E-04      |
| GOTERM_BP_ALL   | GO:0048666~neuron development                                    | 1.09E-04      |
| GOTERM_BP_ALL   | GO:0032990~cell part morphogenesis                               | 1.10E-04      |
| GOTERM_BP_ALL   | GO:0048731~system development                                    | 1.24E-04      |
| GOTERM_CC_ALL   | GO:0045202~synapse                                               | 1.30E-04      |
| GOTERM_BP_ALL   | GO:0000902~cell morphogenesis                                    | 1.83E-04      |
| GOTERM_MF_ALL   | GO:0046982~protein heterodimerization activity                   | 2.01E-04      |
| GOTERM_CC_ALL   | GO:0030425~dendrite                                              | 2.07E-04      |
| GOTERM_BP_ALL   | GO:0032412~regulation of ion transmembrane transporter activity  | 2.30E-04      |
| GOTERM_BP_ALL   | GO:0048519~negative regulation of biological process             | 2.32E-04      |
| GOTERM_BP_ALL   | GO:0048856~anatomical structure development                      | 2.35E-04      |
| GOTERM_BP_ALL   | GO:0060134~prepulse inhibition                                   | 2.35E-04      |
| GOTERM_BP_ALL   | GO:0034765~regulation of ion transmembrane transport             | 2.71E-04      |
| GOTERM_BP_ALL   | GO:0022898~regulation of transmembrane transporter activity      | 3.17E-04      |

Supplementary Table 7

|               |                                                                     |          |
|---------------|---------------------------------------------------------------------|----------|
| GOTERM_BP_ALL | GO:0048523~negative regulation of cellular process                  | 3.46E-04 |
| GOTERM_BP_ALL | GO:0007275~multicellular organismal development                     | 3.68E-04 |
| GOTERM_BP_ALL | GO:0034762~regulation of transmembrane transport                    | 3.69E-04 |
| GOTERM_BP_ALL | GO:0032501~multicellular organismal process                         | 4.20E-04 |
| GOTERM_BP_ALL | GO:0007154~cell communication                                       | 4.28E-04 |
| GOTERM_CC_ALL | GO:0042734~presynaptic membrane                                     | 4.67E-04 |
| GOTERM_BP_ALL | GO:0032989~cellular component morphogenesis                         | 5.31E-04 |
| GOTERM_BP_ALL | GO:0007267~cell-cell signaling                                      | 5.84E-04 |
| GOTERM_BP_ALL | GO:0022008~neurogenesis                                             | 5.96E-04 |
| GOTERM_BP_ALL | GO:0008285~negative regulation of cell proliferation                | 7.19E-04 |
| GOTERM_BP_ALL | GO:0007610~behavior                                                 | 7.92E-04 |
| GOTERM_BP_ALL | GO:0032409~regulation of transporter activity                       | 8.09E-04 |
| GOTERM_MF_ALL | GO:0005246~calcium channel regulator activity                       | 8.61E-04 |
| GOTERM_BP_ALL | GO:0001964~startle response                                         | 1.04E-03 |
| GOTERM_BP_ALL | GO:0042592~homeostatic process                                      | 1.25E-03 |
| GOTERM_BP_ALL | GO:0032502~developmental process                                    | 1.28E-03 |
| GOTERM_BP_ALL | GO:0030182~neuron differentiation                                   | 1.39E-03 |
| GOTERM_BP_ALL | GO:0043269~regulation of ion transport                              | 1.56E-03 |
| GOTERM_BP_ALL | GO:0050804~regulation of synaptic transmission                      | 1.58E-03 |
| GOTERM_BP_ALL | GO:0060079~regulation of excitatory postsynaptic membrane potential | 1.74E-03 |
| GOTERM_BP_ALL | GO:0001975~response to amphetamine                                  | 1.74E-03 |
| GOTERM_BP_ALL | GO:0016043~cellular component organization                          | 1.83E-03 |
| GOTERM_CC_ALL | GO:0014069~postsynaptic density                                     | 1.95E-03 |
| GOTERM_BP_ALL | GO:0009416~response to light stimulus                               | 1.96E-03 |
| GOTERM_BP_ALL | GO:0048699~generation of neurons                                    | 1.96E-03 |
| GOTERM_MF_ALL | GO:0046983~protein dimerization activity                            | 1.99E-03 |
| GOTERM_BP_ALL | GO:0030154~cell differentiation                                     | 2.00E-03 |
| GOTERM_BP_ALL | GO:0050801~ion homeostasis                                          | 2.05E-03 |
| GOTERM_BP_ALL | GO:0007626~locomotory behavior                                      | 2.09E-03 |
| GOTERM_BP_ALL | GO:0048878~chemical homeostasis                                     | 2.14E-03 |
| GOTERM_BP_ALL | GO:0051899~membrane depolarization                                  | 2.21E-03 |
| GOTERM_BP_ALL | GO:0007411~axon guidance                                            | 2.34E-03 |
| GOTERM_BP_ALL | GO:0051969~regulation of transmission of nerve impulse              | 2.40E-03 |
| GOTERM_CC_ALL | GO:0044463~cell projection part                                     | 2.50E-03 |
| GOTERM_BP_ALL | GO:0055074~calcium ion homeostasis                                  | 2.62E-03 |

Supplementary Table 7

|               |                                                                   |          |
|---------------|-------------------------------------------------------------------|----------|
| GOTERM_BP_ALL | GO:0008016~regulation of heart contraction                        | 2.78E-03 |
| GOTERM_BP_ALL | GO:0050877~neurological system process                            | 2.88E-03 |
| GOTERM_BP_ALL | GO:0031644~regulation of neurological system process              | 3.02E-03 |
| GOTERM_BP_ALL | GO:0060078~regulation of postsynaptic membrane potential          | 3.07E-03 |
| GOTERM_BP_ALL | GO:0010959~regulation of metal ion transport                      | 3.68E-03 |
| GOTERM_CC_ALL | GO:0044459~plasma membrane part                                   | 3.80E-03 |
| GOTERM_CC_ALL | GO:0005856~cytoskeleton                                           | 3.82E-03 |
| GOTERM_BP_ALL | GO:0032102~negative regulation of response to external stimulus   | 3.84E-03 |
| GOTERM_MF_ALL | GO:0035254~glutamate receptor binding                             | 3.86E-03 |
| GOTERM_BP_ALL | GO:0048869~cellular developmental process                         | 3.88E-03 |
| GOTERM_BP_ALL | GO:0009314~response to radiation                                  | 4.10E-03 |
| GOTERM_CC_ALL | GO:0005626~insoluble fraction                                     | 4.11E-03 |
| GOTERM_BP_ALL | GO:0065007~biological regulation                                  | 4.17E-03 |
| GOTERM_BP_ALL | GO:0009653~anatomical structure morphogenesis                     | 4.27E-03 |
| GOTERM_BP_ALL | GO:0030534~adult behavior                                         | 4.30E-03 |
| GOTERM_BP_ALL | GO:0008542~visual learning                                        | 4.38E-03 |
| GOTERM_BP_ALL | GO:0003008~system process                                         | 4.43E-03 |
| GOTERM_BP_ALL | GO:0055065~metal ion homeostasis                                  | 4.47E-03 |
| GOTERM_BP_ALL | GO:0032879~regulation of localization                             | 4.54E-03 |
| GOTERM_CC_ALL | GO:0033267~axon part                                              | 4.55E-03 |
| GOTERM_MF_ALL | GO:0030674~protein binding, bridging                              | 4.65E-03 |
| GOTERM_MF_ALL | GO:0016247~channel regulator activity                             | 4.92E-03 |
| GOTERM_BP_ALL | GO:0030856~regulation of epithelial cell differentiation          | 5.41E-03 |
| GOTERM_BP_ALL | GO:0030858~positive regulation of epithelial cell differentiation | 5.58E-03 |
| GOTERM_CC_ALL | GO:0005624~membrane fraction                                      | 6.04E-03 |
| GOTERM_BP_ALL | GO:0016192~vesicle-mediated transport                             | 6.38E-03 |
| GOTERM_CC_ALL | GO:0005813~centrosome                                             | 6.42E-03 |
| GOTERM_BP_ALL | GO:0007632~visual behavior                                        | 6.58E-03 |
| GOTERM_BP_ALL | GO:0006939~smooth muscle contraction                              | 7.22E-03 |
| GOTERM_BP_ALL | GO:0009628~response to abiotic stimulus                           | 7.48E-03 |
| KEGG_PATHWAY  | hsa04020:Calcium signaling pathway                                | 7.66E-03 |
| GOTERM_BP_ALL | GO:0006873~cellular ion homeostasis                               | 7.78E-03 |
| GOTERM_CC_ALL | GO:0031252~cell leading edge                                      | 7.82E-03 |
| GOTERM_BP_ALL | GO:0007417~central nervous system development                     | 7.85E-03 |
| GOTERM_BP_ALL | GO:0006874~cellular calcium ion homeostasis                       | 8.50E-03 |



Supplementary Table 7

|                                |                                                                           |          |
|--------------------------------|---------------------------------------------------------------------------|----------|
| GOTERM_BP_ALL                  | GO:0008217~regulation of blood pressure                                   | 8.64E-03 |
| GOTERM_BP_ALL                  | GO:0055082~cellular chemical homeostasis                                  | 8.73E-03 |
| GOTERM_BP_ALL                  | GO:0040011~locomotion                                                     | 8.74E-03 |
| GOTERM_BP_ALL                  | GO:0006816~calcium ion transport                                          | 8.84E-03 |
| GOTERM_CC_ALL                  | GO:0031253~cell projection membrane                                       | 8.86E-03 |
| GOTERM_BP_ALL                  | GO:0051049~regulation of transport                                        | 9.21E-03 |
| GOTERM_MF_ALL                  | GO:0003682~chromatin binding                                              | 9.39E-03 |
| GOTERM_BP_ALL                  | GO:0019932~second-messenger-mediated signaling                            | 9.60E-03 |
| GOTERM_CC_ALL                  | GO:0005913~cell-cell adherens junction                                    | 9.80E-03 |
| GOTERM_BP_ALL                  | GO:0060081~membrane hyperpolarization                                     | 9.98E-03 |
| GOTERM_BP_ALL                  | GO:0007631~feeding behavior                                               | 1.03E-02 |
| GOTERM_BP_ALL                  | GO:0055080~cation homeostasis                                             | 1.03E-02 |
| GOTERM_BP_ALL                  | GO:0055066~di-, tri-valent inorganic cation homeostasis                   | 1.05E-02 |
| GOTERM_BP_ALL                  | GO:0007050~cell cycle arrest                                              | 1.06E-02 |
| GOTERM_CC_ALL                  | GO:0044456~synapse part                                                   | 1.09E-02 |
| GOTERM_BP_ALL                  | GO:0042127~regulation of cell proliferation                               | 1.12E-02 |
| GOTERM_BP_ALL                  | GO:0001525~angiogenesis                                                   | 1.15E-02 |
| GOTERM_BP_ALL                  | GO:0043576~regulation of respiratory gaseous exchange                     | 1.17E-02 |
| GOTERM_BP_ALL                  | GO:0007229~integrin-mediated signaling pathway                            | 1.20E-02 |
| GOTERM_BP_ALL                  | GO:0006875~cellular metal ion homeostasis                                 | 1.21E-02 |
| GOTERM_BP_ALL                  | GO:0007204~elevation of cytosolic calcium ion concentration               | 1.23E-02 |
| GOTERM_BP_ALL                  | GO:0010648~negative regulation of cell communication                      | 1.25E-02 |
| GOTERM_BP_ALL                  | GO:0046903~secretion                                                      | 1.25E-02 |
| GOTERM_CC_ALL                  | GO:0005887~integral to plasma membrane                                    | 1.27E-02 |
| GENETIC_ASSOCIATION_DB_DISEASE | panic disorder                                                            | 1.28E-02 |
| GOTERM_BP_ALL                  | GO:0006323~DNA packaging                                                  | 1.28E-02 |
| GOTERM_CC_ALL                  | GO:0005815~microtubule organizing center                                  | 1.29E-02 |
| GOTERM_BP_ALL                  | GO:0001568~blood vessel development                                       | 1.30E-02 |
| GOTERM_BP_ALL                  | GO:0060341~regulation of cellular localization                            | 1.30E-02 |
| GOTERM_BP_ALL                  | GO:0048646~anatomical structure formation involved in morphogenesis       | 1.36E-02 |
| GOTERM_BP_ALL                  | GO:0014075~response to amine stimulus                                     | 1.36E-02 |
| GOTERM_MF_ALL                  | GO:0008092~cytoskeletal protein binding                                   | 1.38E-02 |
| GOTERM_BP_ALL                  | GO:0019725~cellular homeostasis                                           | 1.44E-02 |
| GOTERM_BP_ALL                  | GO:0001944~vasculature development                                        | 1.50E-02 |
| GENETIC_ASSOCIATION_DB_DISEASE | attention deficit disorder conduct disorder oppositional defiant disorder | 1.56E-02 |

Supplementary Table 7

|               |                                                                  |          |
|---------------|------------------------------------------------------------------|----------|
| KEGG_PATHWAY  | hsa05412:Arrhythmogenic right ventricular cardiomyopathy (ARVC)  | 1.57E-02 |
| GOTERM_BP_ALL | GO:0051480~cytosolic calcium ion homeostasis                     | 1.59E-02 |
| GOTERM_CC_ALL | GO:0000267~cell fraction                                         | 1.59E-02 |
| GOTERM_CC_ALL | GO:0031226~intrinsic to plasma membrane                          | 1.64E-02 |
| GOTERM_BP_ALL | GO:0051276~chromosome organization                               | 1.69E-02 |
| GOTERM_MF_ALL | GO:0005515~protein binding                                       | 1.70E-02 |
| GOTERM_BP_ALL | GO:0050789~regulation of biological process                      | 1.72E-02 |
| GOTERM_BP_ALL | GO:0043062~extracellular structure organization                  | 1.74E-02 |
| GOTERM_BP_ALL | GO:0014072~response to isoquinoline alkaloid                     | 1.75E-02 |
| GOTERM_BP_ALL | GO:0043278~response to morphine                                  | 1.75E-02 |
| GOTERM_BP_ALL | GO:0048514~blood vessel morphogenesis                            | 1.79E-02 |
| GOTERM_BP_ALL | GO:0010646~regulation of cell communication                      | 1.81E-02 |
| GOTERM_BP_ALL | GO:0014070~response to organic cyclic substance                  | 1.82E-02 |
| GOTERM_BP_ALL | GO:0006928~cell motion                                           | 1.90E-02 |
| GOTERM_CC_ALL | GO:0015629~actin cytoskeleton                                    | 1.95E-02 |
| GOTERM_BP_ALL | GO:0060402~calcium ion transport into cytosol                    | 1.97E-02 |
| GOTERM_BP_ALL | GO:0032228~regulation of synaptic transmission, GABAergic        | 1.97E-02 |
| GOTERM_CC_ALL | GO:0031982~vesicle                                               | 1.98E-02 |
| GOTERM_BP_ALL | GO:0043065~positive regulation of apoptosis                      | 2.06E-02 |
| GOTERM_CC_ALL | GO:0044427~chromosomal part                                      | 2.13E-02 |
| GOTERM_BP_ALL | GO:0043068~positive regulation of programmed cell death          | 2.16E-02 |
| GOTERM_BP_ALL | GO:0060401~cytosolic calcium ion transport                       | 2.20E-02 |
| GOTERM_BP_ALL | GO:0010942~positive regulation of cell death                     | 2.23E-02 |
| GOTERM_BP_ALL | GO:0015674~di-, tri-valent inorganic cation transport            | 2.32E-02 |
| GOTERM_BP_ALL | GO:0051966~regulation of synaptic transmission, glutamatergic    | 2.44E-02 |
| GOTERM_CC_ALL | GO:0045211~postsynaptic membrane                                 | 2.44E-02 |
| GOTERM_CC_ALL | GO:0031988~membrane-bounded vesicle                              | 2.47E-02 |
| GOTERM_BP_ALL | GO:0030005~cellular di-, tri-valent inorganic cation homeostasis | 2.48E-02 |
| GOTERM_BP_ALL | GO:0009896~positive regulation of catabolic process              | 2.50E-02 |
| GOTERM_CC_ALL | GO:0031012~extracellular matrix                                  | 2.57E-02 |
| GOTERM_BP_ALL | GO:0016477~cell migration                                        | 2.59E-02 |
| KEGG_PATHWAY  | hsa04360:Axon guidance                                           | 2.62E-02 |
| GOTERM_BP_ALL | GO:0022402~cell cycle process                                    | 2.64E-02 |
| GOTERM_CC_ALL | GO:0005694~chromosome                                            | 2.66E-02 |
| GOTERM_BP_ALL | GO:0043279~response to alkaloid                                  | 2.78E-02 |

Supplementary Table 7

|                                |                                                         |          |
|--------------------------------|---------------------------------------------------------|----------|
| GOTERM_BP_ALL                  | GO:0007155~cell adhesion                                | 2.80E-02 |
| GOTERM_BP_ALL                  | GO:0022610~biological adhesion                          | 2.83E-02 |
| GOTERM_BP_ALL                  | GO:0001775~cell activation                              | 2.85E-02 |
| GOTERM_BP_ALL                  | GO:0051051~negative regulation of transport             | 2.87E-02 |
| GOTERM_CC_ALL                  | GO:0031410~cytoplasmic vesicle                          | 2.89E-02 |
| GOTERM_BP_ALL                  | GO:0008015~blood circulation                            | 2.90E-02 |
| GOTERM_BP_ALL                  | GO:0003013~circulatory system process                   | 2.90E-02 |
| GOTERM_BP_ALL                  | GO:0051179~localization                                 | 3.09E-02 |
| GOTERM_BP_ALL                  | GO:0030001~metal ion transport                          | 3.15E-02 |
| GOTERM_BP_ALL                  | GO:0048518~positive regulation of biological process    | 3.16E-02 |
| GOTERM_BP_ALL                  | GO:0042133~neurotransmitter metabolic process           | 3.21E-02 |
| GOTERM_BP_ALL                  | GO:0002027~regulation of heart rate                     | 3.21E-02 |
| GENETIC_ASSOCIATION_DB_DISEASE | anxiety response                                        | 3.41E-02 |
| GOTERM_CC_ALL                  | GO:0031256~leading edge membrane                        | 3.41E-02 |
| GOTERM_CC_ALL                  | GO:0044430~cytoskeletal part                            | 3.44E-02 |
| GOTERM_CC_ALL                  | GO:0012505~endomembrane system                          | 3.46E-02 |
| GOTERM_BP_ALL                  | GO:0009719~response to endogenous stimulus              | 3.51E-02 |
| GOTERM_BP_ALL                  | GO:0009894~regulation of catabolic process              | 3.53E-02 |
| GOTERM_BP_ALL                  | GO:0022403~cell cycle phase                             | 3.56E-02 |
| GOTERM_BP_ALL                  | GO:0040012~regulation of locomotion                     | 3.62E-02 |
| GOTERM_CC_ALL                  | GO:0043232~intracellular non-membrane-bounded organelle | 3.69E-02 |
| GOTERM_CC_ALL                  | GO:0043228~non-membrane-bounded organelle               | 3.69E-02 |
| GOTERM_BP_ALL                  | GO:0051588~regulation of neurotransmitter transport     | 3.77E-02 |
| GOTERM_BP_ALL                  | GO:0030073~insulin secretion                            | 3.77E-02 |
| GOTERM_BP_ALL                  | GO:0048585~negative regulation of response to stimulus  | 3.88E-02 |
| GOTERM_BP_ALL                  | GO:0007612~learning                                     | 4.03E-02 |
| GOTERM_BP_ALL                  | GO:0045785~positive regulation of cell adhesion         | 4.03E-02 |
| GOTERM_BP_ALL                  | GO:0007215~glutamate signaling pathway                  | 4.07E-02 |
| GOTERM_BP_ALL                  | GO:0030261~chromosome condensation                      | 4.07E-02 |
| GOTERM_CC_ALL                  | GO:0016023~cytoplasmic membrane-bounded vesicle         | 4.11E-02 |
| GOTERM_BP_ALL                  | GO:0030198~extracellular matrix organization            | 4.13E-02 |
| GOTERM_CC_ALL                  | GO:0005578~proteinaceous extracellular matrix           | 4.21E-02 |
| GOTERM_BP_ALL                  | GO:0030003~cellular cation homeostasis                  | 4.21E-02 |
| GOTERM_BP_ALL                  | GO:0006812~cation transport                             | 4.26E-02 |
| GOTERM_BP_ALL                  | GO:0003014~renal system process                         | 4.37E-02 |

## Supplementary Table 7

|               |                                                                    |          |
|---------------|--------------------------------------------------------------------|----------|
| GOTERM_BP_ALL | GO:0050905~neuromuscular process                                   | 4.38E-02 |
| GOTERM_BP_ALL | GO:0051674~localization of cell                                    | 4.44E-02 |
| GOTERM_BP_ALL | GO:0048870~cell motility                                           | 4.44E-02 |
| GOTERM_BP_ALL | GO:0007346~regulation of mitotic cell cycle                        | 4.45E-02 |
| GOTERM_CC_ALL | GO:0005912~adherens junction                                       | 4.47E-02 |
| GOTERM_BP_ALL | GO:0045595~regulation of cell differentiation                      | 4.54E-02 |
| GOTERM_BP_ALL | GO:0045732~positive regulation of protein catabolic process        | 4.68E-02 |
| GOTERM_MF_ALL | GO:0004714~transmembrane receptor protein tyrosine kinase activity | 4.72E-02 |
| GOTERM_MF_ALL | GO:0001609~adenosine receptor activity, G-protein coupled          | 4.74E-02 |
| GOTERM_BP_ALL | GO:0010243~response to organic nitrogen                            | 4.74E-02 |
| KEGG_PATHWAY  | hsa04080:Neuroactive ligand-receptor interaction                   | 4.79E-02 |
| GOTERM_BP_ALL | GO:0007389~pattern specification process                           | 4.86E-02 |
| GOTERM_BP_ALL | GO:0032101~regulation of response to external stimulus             | 4.89E-02 |
| GOTERM_CC_ALL | GO:0030133~transport vesicle                                       | 4.97E-02 |

**Supplementary Table 8****Sequences of primers utilized in qRT-PCR and in situ hybridization****qRT-PCR**

| <b>Gene Symbol</b>  | <b>Forward</b>         | <b>Reverse</b>         |
|---------------------|------------------------|------------------------|
| <i>AHI1</i>         | AGCAAGCAGGCAGAAAAGTC   | GCATTCGGCAGCTCTTAAC    |
| <i>AUTS2</i>        | GCTGCAGCTCATGACAGAGA   | CCGAGCCTCAGTGTTCCAGAT  |
| <i>CACNA1C</i>      | CCAGGGAGGCAGTTCCAC     | TGGTGACCTCGATGAACTTG   |
| <i>DHCR7</i>        | CATTGACATCTGCCATGACC   | ACAGGTCCTTCTGGTGGTTG   |
| <i>FZD9</i>         | CCATCTCCCCTAATGAGCCT   | CTGCATCCCCTAGAGACAGC   |
| <i>GABRB3</i>       | TCAGCCACTCGATTGTCAAG   | CATGGTTTCCGAAGTCAACA   |
| <i>LIMK1</i>        | TGTTCTCCTTTGGGATCGTC   | CTCCCAGAAACCTCTGTCCA   |
| <i>MECP2</i>        | CACGGAAGCTTAAGCAAAGG   | CATTAGGGTCCAGGGATGTG   |
| <i>NLGN3</i>        | TGTTTTTGGGGTTCCTATGG   | GGCCTTGGTGTGAATGAACT   |
| <i>NRXN1</i>        | GGATTCTTCAATGGCGATGT   | TTCAGGCTTGGGTGACTACC   |
| <i>NRXN3 2/3 5'</i> | TCTATCGTCCCCTGTTTCC    | ACCAAGATGCCATCCTTCAC   |
| <i>NRXN3 1 5'</i>   | CCTCACCAGATGGCTTCATT   | TTGTGCCACTGGTTGTCATT   |
| <i>NRXN3 All 3'</i> | TTGTTGAATGTGAGCCGAGT   | GGCGTACAGGAGGATCAAGA   |
| <i>PTEN</i>         | CGGTGTCATAATGTCTTTCAGC | TGAAGGCGTATACAGGAACAAT |
| <i>SHANK3</i>       | CAGCAGCTGAACAAGGACAC   | GGCCTCACCGAGTACGAG     |
| <i>TSC1</i>         | ACCCAGGTGTTTGAATTGGA   | GGTCTTGGTCTCACCGTTGT   |
| <i>UBE3A</i>        | CATTTCCACAGCCCTCAGTT   | GACGACATTGAAGCTAGCCG   |

**in situ hybridization**

| <b>Gene Symbol</b> | <b>Forward</b>                 | <b>Reverse</b>                 |
|--------------------|--------------------------------|--------------------------------|
| <i>NRXN1</i>       | GGGAAAAATTGGAGTTAAGTTTAATGTTGG | GTGCTAGTAGCCAGGGTCGTGGTAGTCTCC |
| <i>NRXN3</i>       | GAGCTTGGCAGCTCGAGAGGAGAATGTGGC | GGGCTTCCTCCTACATAGAAGAAGTCGTCC |
